# Supplementary material for: Global Profiling of Carbohydrate Active Enzymes in Human Gut Microbiome
Source: PubMed Central journal article supplement (PMC4636310; doi:10.1371/journal.pone.0142038), 2015-11-06
Supplement: pone.0142038.s006.pdf [file pone.0142038.s006.pdf]

| <b>CAZyme_family</b> | <b>Presence_percentage_in samples_analyzed</b> |
|----------------------|------------------------------------------------|
| GH29                 | 100.00                                         |
| GH23                 | 100.00                                         |
| GT4                  | 100.00                                         |
| GH36                 | 100.00                                         |
| GH2                  | 100.00                                         |
| GT28                 | 100.00                                         |
| GH28                 | 100.00                                         |
| GH73                 | 100.00                                         |
| GT5                  | 100.00                                         |
| GH18                 | 100.00                                         |
| GH3                  | 100.00                                         |
| GH31                 | 100.00                                         |
| GH77                 | 100.00                                         |
| GH43                 | 100.00                                         |
| GH51                 | 100.00                                         |
| GT35                 | 100.00                                         |
| GT2                  | 100.00                                         |
| GT51                 | 100.00                                         |
| GH32                 | 100.00                                         |
| GH13                 | 100.00                                         |
| CE4                  | 100.00                                         |
| GH5                  | 99.78                                          |
| CE1                  | 99.78                                          |
| CE9                  | 99.78                                          |
| GH20                 | 99.78                                          |
| GH25                 | 99.78                                          |
| GH35                 | 99.78                                          |
| GT30                 | 99.78                                          |
| GH92                 | 99.55                                          |
| GH95                 | 99.55                                          |
| CE10                 | 99.55                                          |
| GH1                  | 99.33                                          |
| GT26                 | 99.33                                          |
| GH127                | 99.33                                          |
| GH112                | 99.33                                          |
| CE11                 | 99.33                                          |
| GH72                 | 99.11                                          |
| GH24                 | 99.11                                          |
| GT9                  | 99.11                                          |
| CE8                  | 99.11                                          |
| GT19                 | 98.88                                          |
| GH78                 | 98.66                                          |
| GH33                 | 98.66                                          |
| GH125                | 98.66                                          |
| GH38                 | 98.44                                          |
| GT8                  | 98.44                                          |
| GH30                 | 98.44                                          |
| GH42                 | 98.21                                          |
| GH16                 | 97.77                                          |
| GH105                | 97.54                                          |
| GH63                 | 97.54                                          |
| GH65                 | 97.54                                          |
| GH94                 | 97.32                                          |
| GH84                 | 97.32                                          |

|       |       |
|-------|-------|
| GT83  | 97.10 |
| GH89  | 97.10 |
| GH109 | 96.88 |
| GH27  | 96.88 |
| GH4   | 96.88 |
| GH97  | 96.65 |
| GH88  | 96.65 |
| GH53  | 96.43 |
| CE7   | 96.43 |
| GH106 | 95.76 |
| PL1   | 95.76 |
| GH115 | 95.76 |
| GH130 | 95.54 |
| GH57  | 95.09 |
| CE12  | 95.09 |
| GT32  | 95.09 |
| GT3   | 94.42 |
| GH110 | 94.20 |
| GH10  | 93.97 |
| GH9   | 93.75 |
| PL10  | 93.53 |
| GH26  | 92.86 |
| PL11  | 92.63 |
| GH67  | 92.63 |
| PL9   | 91.96 |
| GH123 | 91.52 |
| GH8   | 91.29 |
| PL8   | 91.07 |
| GT11  | 90.63 |
| CE2   | 89.51 |
| GT1   | 88.39 |
| GT47  | 87.72 |
| GH117 | 87.72 |
| GT20  | 87.28 |
| GH66  | 85.27 |
