# Supplementary material for: Global Profiling of Carbohydrate Active Enzymes in Human Gut Microbiome
Source: PubMed Central journal article supplement (PMC4636310; doi:10.1371/journal.pone.0142038), 2015-11-06
Supplement: pone.0142038.s007.pdf [file pone.0142038.s007.pdf]

| CAZY_group | IN-CH-1 | IN-CH-2 | IN-CH-3 | IN-CH-4 | IN-CH-5 | IN-CH-6 | IN-CH-7 | IN-CH-8 | IN-CH-9 | IN-IN-1 | IN-CH-10 | IN-CH-11 | AM-AD-10 | AM-AD-11 | AM-AD-12 | AM-AD-13 | AM-AD-14 | AM-AD-15 | AM-AD-16 | AM-AD-17 |
|------------|---------|---------|---------|---------|---------|---------|---------|---------|---------|---------|----------|----------|----------|----------|----------|----------|----------|----------|----------|----------|
| GH29       | 0.60    | 0.58    | 0.53    | 0.55    | 0.51    | 0.39    | 0.43    | 0.30    | 0.29    | 0.40    | 0.14     | 0.48     | 0.67     | 0.86     | 0.11     | 0.50     | 0.67     | 0.61     | 0.53     | 0.40     |
| PL4        | 0.00    | 0.00    | 0.00    | 0.00    | 0.00    | 0.00    | 0.00    | 0.00    | 0.00    | 0.00    | 0.00     | 0.00     | 0.00     | 0.00     | 0.00     | 0.00     | 0.01     | 0.00     | 0.00     | 0.00     |
| GH23       | 0.45    | 0.86    | 0.61    | 1.31    | 0.62    | 0.45    | 0.59    | 1.07    | 0.80    | 0.64    | 0.99     | 0.98     | 1.20     | 1.42     | 0.49     | 1.18     | 1.20     | 1.38     | 1.18     | 1.14     |
| CE6        | 0.30    | 0.16    | 0.26    | 0.18    | 0.11    | 0.21    | 0.21    | 0.12    | 0.16    | 0.21    | 0.00     | 0.15     | 0.01     | 0.05     | 0.00     | 0.00     | 0.04     | 0.04     | 0.00     | 0.00     |
| GH72       | 0.04    | 0.19    | 0.05    | 0.11    | 0.06    | 0.13    | 0.07    | 0.18    | 0.11    | 0.06    | 0.14     | 0.13     | 0.21     | 0.10     | 0.02     | 0.13     | 0.17     | 0.14     | 0.15     | 0.08     |
| GH114      | 0.00    | 0.00    | 0.00    | 0.00    | 0.00    | 0.00    | 0.00    | 0.00    | 0.00    | 0.00    | 0.00     | 0.00     | 0.00     | 0.00     | 0.00     | 0.01     | 0.00     | 0.00     | 0.00     | 0.00     |
| GH78       | 0.13    | 0.23    | 0.13    | 0.44    | 0.06    | 0.11    | 0.25    | 0.09    | 0.16    | 0.12    | 0.00     | 0.28     | 0.67     | 1.06     | 0.18     | 0.41     | 0.96     | 1.00     | 0.61     | 0.62     |
| PL19       | 0.00    | 0.00    | 0.00    | 0.00    | 0.00    | 0.00    | 0.00    | 0.00    | 0.00    | 0.00    | 0.00     | 0.00     | 0.00     | 0.00     | 0.00     | 0.00     | 0.00     | 0.00     | 0.00     | 0.00     |
| GT27       | 0.00    | 0.00    | 0.00    | 0.00    | 0.00    | 0.00    | 0.00    | 0.00    | 0.00    | 0.00    | 0.07     | 0.00     | 0.00     | 0.00     | 0.00     | 0.00     | 0.00     | 0.00     | 0.00     | 0.00     |
| GH5        | 0.69    | 0.49    | 0.59    | 0.42    | 0.28    | 0.69    | 0.63    | 0.33    | 0.44    | 0.48    | 0.28     | 0.49     | 0.60     | 0.45     | 0.08     | 0.39     | 0.59     | 0.44     | 0.28     | 0.50     |
| GT40       | 0.00    | 0.00    | 0.00    | 0.00    | 0.00    | 0.00    | 0.00    | 0.00    | 0.00    | 0.00    | 0.00     | 0.00     | 0.00     | 0.00     | 0.00     | 0.00     | 0.00     | 0.00     | 0.00     | 0.00     |
| CE13       | 0.00    | 0.00    | 0.00    | 0.00    | 0.00    | 0.00    | 0.00    | 0.00    | 0.00    | 0.00    | 0.00     | 0.00     | 0.00     | 0.00     | 0.00     | 0.00     | 0.01     | 0.00     | 0.00     | 0.00     |
| GT37       | 0.00    | 0.00    | 0.00    | 0.00    | 0.00    | 0.00    | 0.00    | 0.00    | 0.00    | 0.00    | 0.00     | 0.00     | 0.00     | 0.00     | 0.00     | 0.00     | 0.00     | 0.00     | 0.00     | 0.00     |
| GH33       | 0.00    | 0.05    | 0.05    | 0.11    | 0.06    | 0.00    | 0.01    | 0.06    | 0.07    | 0.04    | 0.35     | 0.00     | 0.24     | 0.26     | 0.06     | 0.21     | 0.19     | 0.24     | 0.22     | 0.11     |
| GT65       | 0.00    | 0.00    | 0.00    | 0.00    | 0.00    | 0.00    | 0.00    | 0.00    | 0.00    | 0.00    | 0.00     | 0.00     | 0.00     | 0.00     | 0.00     | 0.00     | 0.00     | 0.00     | 0.00     | 0.00     |
| GH86       | 0.00    | 0.00    | 0.00    | 0.00    | 0.00    | 0.00    | 0.00    | 0.00    | 0.00    | 0.00    | 0.00     | 0.00     | 0.00     | 0.00     | 0.00     | 0.01     | 0.01     | 0.00     | 0.00     | 0.00     |
| GH123      | 0.09    | 0.05    | 0.10    | 0.07    | 0.00    | 0.06    | 0.04    | 0.09    | 0.07    | 0.06    | 0.00     | 0.08     | 0.10     | 0.13     | 0.02     | 0.10     | 0.17     | 0.17     | 0.09     | 0.04     |
| GH96       | 0.00    | 0.00    | 0.00    | 0.00    | 0.00    | 0.00    | 0.00    | 0.00    | 0.00    | 0.00    | 0.00     | 0.00     | 0.00     | 0.00     | 0.00     | 0.00     | 0.00     | 0.00     | 0.00     | 0.00     |
| GH14       | 0.00    | 0.00    | 0.00    | 0.00    | 0.00    | 0.00    | 0.00    | 0.00    | 0.00    | 0.00    | 0.00     | 0.00     | 0.00     | 0.00     | 0.00     | 0.00     | 0.00     | 0.00     | 0.00     | 0.00     |
| CE3        | 0.00    | 0.00    | 0.00    | 0.00    | 0.00    | 0.00    | 0.01    | 0.00    | 0.00    | 0.00    | 0.00     | 0.00     | 0.01     | 0.00     | 0.00     | 0.00     | 0.01     | 0.00     | 0.00     | 0.00     |
| PL10       | 0.17    | 0.04    | 0.19    | 0.24    | 0.11    | 0.28    | 0.24    | 0.09    | 0.16    | 0.27    | 0.00     | 0.18     | 0.04     | 0.13     | 0.03     | 0.02     | 0.09     | 0.05     | 0.07     | 0.07     |
| GT48       | 0.00    | 0.00    | 0.00    | 0.00    | 0.00    | 0.00    | 0.00    | 0.00    | 0.00    | 0.00    | 0.00     | 0.00     | 0.00     | 0.00     | 0.00     | 0.00     | 0.00     | 0.00     | 0.00     | 0.00     |
| PL6        | 0.00    | 0.00    | 0.00    | 0.00    | 0.00    | 0.00    | 0.00    | 0.00    | 0.00    | 0.00    | 0.00     | 0.00     | 0.00     | 0.00     | 0.00     | 0.00     | 0.00     | 0.00     | 0.01     | 0.00     |
| GT83       | 0.11    | 0.12    | 0.26    | 0.15    | 0.11    | 0.06    | 0.10    | 0.24    | 0.05    | 0.23    | 0.21     | 0.18     | 0.09     | 0.08     | 0.02     | 0.07     | 0.10     | 0.07     | 0.08     | 0.05     |
| GH126      | 0.00    | 0.00    | 0.00    | 0.00    | 0.00    | 0.00    | 0.00    | 0.00    | 0.00    | 0.00    | 0.00     | 0.00     | 0.00     | 0.00     | 0.00     | 0.00     | 0.00     | 0.00     | 0.00     | 0.00     |
| GH9        | 0.06    | 0.04    | 0.03    | 0.11    | 0.00    | 0.02    | 0.03    | 0.03    | 0.07    | 0.12    | 0.00     | 0.16     | 0.31     | 0.15     | 0.05     | 0.20     | 0.12     | 0.13     | 0.14     | 0.39     |
| GH75       | 0.00    | 0.00    | 0.00    | 0.00    | 0.00    | 0.00    | 0.00    | 0.00    | 0.00    | 0.00    | 0.00     | 0.00     | 0.00     | 0.00     | 0.00     | 0.00     | 0.00     | 0.00     | 0.00     | 0.00     |
| GT71       | 0.00    | 0.00    | 0.00    | 0.00    | 0.00    | 0.00    | 0.00    | 0.00    | 0.00    | 0.00    | 0.00     | 0.00     | 0.00     | 0.00     | 0.00     | 0.00     | 0.00     | 0.00     | 0.00     | 0.00     |
| GH46       | 0.00    | 0.00    | 0.00    | 0.00    | 0.00    | 0.00    | 0.00    | 0.00    | 0.00    | 0.00    | 0.00     | 0.00     | 0.01     | 0.00     | 0.00     | 0.00     | 0.00     | 0.00     | 0.00     | 0.00     |
| GT61       | 0.00    | 0.00    | 0.00    | 0.00    | 0.00    | 0.00    | 0.00    | 0.00    | 0.00    | 0.00    | 0.00     | 0.00     | 0.00     | 0.00     | 0.00     | 0.00     | 0.00     | 0.00     | 0.00     | 0.00     |
| GT3        | 0.32    | 0.18    | 0.14    | 0.35    | 0.06    | 0.24    | 0.18    | 0.18    | 0.09    | 0.19    | 0.00     | 0.28     | 0.27     | 0.16     | 0.03     | 0.13     | 0.24     | 0.30     | 0.12     | 0.12     |
| PL3        | 0.00    | 0.00    | 0.00    | 0.00    | 0.00    | 0.00    | 0.00    | 0.00    | 0.00    | 0.00    | 0.00     | 0.00     | 0.00     | 0.00     | 0.00     | 0.00     | 0.00     | 0.00     | 0.00     | 0.00     |
| GH108      | 0.04    | 0.00    | 0.02    | 0.00    | 0.00    | 0.02    | 0.01    | 0.00    | 0.00    | 0.04    | 0.00     | 0.00     | 0.01     | 0.05     | 0.01     | 0.04     | 0.03     | 0.04     | 0.03     | 0.07     |
| GT56       | 0.00    | 0.00    | 0.00    | 0.00    | 0.00    | 0.00    | 0.01    | 0.12    | 0.00    | 0.00    | 0.14     | 0.03     | 0.00     | 0.00     | 0.00     | 0.00     | 0.00     | 0.00     | 0.00     | 0.00     |
| PL11       | 0.00    | 0.02    | 0.02    | 0.02    | 0.00    | 0.07    | 0.03    | 0.03    | 0.04    | 0.00    | 0.00     | 0.07     | 0.06     | 0.21     | 0.01     | 0.03     | 0.23     | 0.15     | 0.11     | 0.13     |
| GH45       | 0.00    | 0.00    | 0.00    | 0.00    | 0.00    | 0.00    | 0.00    | 0.00    | 0.00    | 0.00    | 0.00     | 0.00     | 0.00     | 0.00     | 0.00     | 0.00     | 0.01     | 0.00     | 0.00     | 0.00     |
| GT34       | 0.00    | 0.00    | 0.00    | 0.00    | 0.00    | 0.00    | 0.00    | 0.00    | 0.00    | 0.00    | 0.00     | 0.02     | 0.01     | 0.00     | 0.00     | 0.00     | 0.01     | 0.00     | 0.00     | 0.00     |
| PL14       | 0.00    | 0.00    | 0.00    | 0.00    | 0.00    | 0.00    | 0.00    | 0.00    | 0.00    | 0.00    | 0.00     | 0.00     | 0.00     | 0.00     | 0.00     | 0.00     | 0.00     | 0.00     | 0.00     | 0.00     |
| GH19       | 0.00    | 0.00    | 0.00    | 0.00    | 0.00    | 0.00    | 0.01    | 0.00    | 0.02    | 0.00    | 0.00     | 0.03     | 0.01     | 0.01     | 0.00     | 0.00     | 0.01     | 0.01     | 0.01     | 0.00     |
| GH118      | 0.00    | 0.00    | 0.00    | 0.00    | 0.00    | 0.00    | 0.00    | 0.00    | 0.00    | 0.00    | 0.00     | 0.00     | 0.00     | 0.00     | 0.00     | 0.00     | 0.00     | 0.00     | 0.00     | 0.00     |
| GH82       | 0.00    | 0.00    | 0.00    | 0.00    | 0.00    | 0.00    | 0.00    | 0.00    | 0.00    | 0.00    | 0.00     | 0.00     | 0.00     | 0.00     | 0.00     | 0.00     | 0.00     | 0.00     | 0.00     | 0.00     |
| GH76       | 0.00    | 0.00    | 0.00    | 0.00    | 0.00    | 0.00    | 0.00    | 0.00    | 0.00    | 0.00    | 0.00     | 0.02     | 0.14     | 0.20     | 0.03     | 0.13     | 0.13     | 0.13     | 0.12     | 0.12     |
| GT4        | 1.62    | 1.51    | 1.47    | 1.51    | 1.96    | 1.51    | 1.25    | 1.58    | 1.81    | 1.48    | 0.57     | 1.44     | 2.07     | 2.50     | 0.48     | 1.46     | 2.26     | 2.32     | 2.15     | 1.67     |
| GT87       | 0.00    | 0.00    | 0.00    | 0.00    | 0.00    | 0.00    | 0.00    | 0.03    | 0.00    | 0.02    | 0.00     | 0.00     | 0.01     | 0.00     | 0.00     | 0.00     | 0.01     | 0.01     | 0.01     | 0.00     |
| GH24       | 0.41    | 0.30    | 0.35    | 0.35    | 0.39    | 0.49    | 0.17    | 0.27    | 0.24    | 0.37    | 0.28     | 0.25     | 0.15     | 0.10     | 0.04     | 0.14     | 0.08     | 0.08     | 0.10     | 0.05     |
| GH90       | 0.00    | 0.00    | 0.00    | 0.00    | 0.00    | 0.00    | 0.00    | 0.00    | 0.00    | 0.00    | 0.00     | 0.00     | 0.00     | 0.00     | 0.00     | 0.00     | 0.00     | 0.00     | 0.00     | 0.00     |
| GH57       | 0.15    | 0.14    | 0.14    | 0.35    | 0.00    | 0.13    | 0.10    | 0.06    | 0.29    | 0.25    | 0.00     | 0.15     | 0.28     | 0.19     | 0.02     | 0.11     | 0.14     | 0.14     | 0.11     | 0.08     |
| GH36       | 1.08    | 0.93    | 0.75    | 0.80    | 1.52    | 0.78    | 0.92    | 1.07    | 0.97    | 0.89    | 0.28     | 0.90     | 0.87     | 0.88     | 0.18     | 0.56     | 0.95     | 0.84     | 0.69     | 0.51     |
| GT46       | 0.00    | 0.00    | 0.00    | 0.00    | 0.00    | 0.00    | 0.00    | 0.00    | 0.00    | 0.00    | 0.00     | 0.00     | 0.00     | 0.00     | 0.00     | 0.00     | 0.00     | 0.00     | 0.00     | 0.00     |
| GH66       | 0.13    | 0.07    | 0.03    | 0.04    | 0.11    | 0.15    | 0.03    | 0.12    | 0.15    | 0.10    | 0.00     | 0.05     | 0.03     | 0.06     | 0.01     | 0.02     | 0.03     | 0.03     | 0.02     | 0.01     |



| CAZY_group | IN-CH-1 | IN-CH-2 | IN-CH-3 | IN-CH-4 | IN-CH-5 | IN-CH-6 | IN-CH-7 | IN-CH-8 | IN-CH-9 | IN-IN-1 | IN-CH-10 | IN-CH-11 | AM-AD-10 | AM-AD-11 | AM-AD-12 | AM-AD-13 | AM-AD-14 | AM-AD-15 | AM-AD-16 | AM-AD-17 |
|------------|---------|---------|---------|---------|---------|---------|---------|---------|---------|---------|----------|----------|----------|----------|----------|----------|----------|----------|----------|----------|
| GT76       | 0.00    | 0.00    | 0.00    | 0.00    | 0.00    | 0.00    | 0.00    | 0.00    | 0.00    | 0.00    | 0.00     | 0.00     | 0.00     | 0.00     | 0.00     | 0.00     | 0.01     | 0.00     | 0.00     | 0.00     |
| GT32       | 0.09    | 0.09    | 0.03    | 0.04    | 0.00    | 0.07    | 0.04    | 0.00    | 0.07    | 0.02    | 0.00     | 0.02     | 0.12     | 0.11     | 0.02     | 0.06     | 0.09     | 0.15     | 0.08     | 0.04     |
| GT47       | 0.17    | 0.11    | 0.03    | 0.07    | 0.00    | 0.04    | 0.03    | 0.15    | 0.07    | 0.15    | 0.07     | 0.03     | 0.06     | 0.09     | 0.02     | 0.06     | 0.07     | 0.07     | 0.08     | 0.06     |
| GH84       | 0.19    | 0.18    | 0.19    | 0.18    | 0.06    | 0.07    | 0.14    | 0.18    | 0.16    | 0.25    | 0.07     | 0.10     | 0.11     | 0.11     | 0.03     | 0.08     | 0.13     | 0.07     | 0.11     | 0.06     |
| GH83       | 0.00    | 0.00    | 0.00    | 0.00    | 0.00    | 0.00    | 0.00    | 0.00    | 0.00    | 0.00    | 0.00     | 0.00     | 0.00     | 0.00     | 0.00     | 0.00     | 0.00     | 0.00     | 0.00     | 0.00     |
| GT59       | 0.00    | 0.00    | 0.00    | 0.00    | 0.00    | 0.00    | 0.00    | 0.00    | 0.00    | 0.00    | 0.00     | 0.00     | 0.00     | 0.00     | 0.00     | 0.00     | 0.00     | 0.00     | 0.00     | 0.01     |
| GH34       | 0.00    | 0.00    | 0.00    | 0.00    | 0.00    | 0.00    | 0.00    | 0.00    | 0.00    | 0.00    | 0.00     | 0.00     | 0.00     | 0.00     | 0.00     | 0.00     | 0.00     | 0.00     | 0.00     | 0.00     |
| GT14       | 0.04    | 0.00    | 0.02    | 0.02    | 0.06    | 0.06    | 0.01    | 0.09    | 0.09    | 0.04    | 0.00     | 0.05     | 0.02     | 0.02     | 0.01     | 0.01     | 0.02     | 0.02     | 0.04     | 0.02     |
| GH47       | 0.00    | 0.00    | 0.00    | 0.00    | 0.00    | 0.00    | 0.00    | 0.00    | 0.00    | 0.00    | 0.00     | 0.00     | 0.00     | 0.00     | 0.00     | 0.00     | 0.01     | 0.01     | 0.00     | 0.03     |
| GH97       | 1.17    | 0.86    | 1.17    | 0.93    | 0.84    | 1.34    | 1.12    | 0.86    | 0.93    | 1.12    | 0.00     | 0.97     | 0.71     | 0.93     | 0.07     | 0.53     | 0.68     | 0.82     | 0.61     | 0.58     |
| GH50       | 0.00    | 0.00    | 0.00    | 0.00    | 0.00    | 0.00    | 0.00    | 0.00    | 0.00    | 0.02    | 0.00     | 0.02     | 0.01     | 0.06     | 0.00     | 0.00     | 0.05     | 0.09     | 0.01     | 0.02     |
| GT26       | 0.15    | 0.21    | 0.24    | 0.31    | 0.11    | 0.32    | 0.17    | 0.24    | 0.24    | 0.12    | 0.00     | 0.18     | 0.21     | 0.17     | 0.06     | 0.19     | 0.21     | 0.20     | 0.19     | 0.13     |
| GH18       | 0.19    | 0.37    | 0.19    | 0.33    | 0.39    | 0.09    | 0.08    | 0.27    | 0.15    | 0.12    | 0.35     | 0.36     | 0.75     | 0.85     | 0.15     | 0.53     | 0.79     | 0.72     | 0.64     | 0.53     |
| GH37       | 0.00    | 0.00    | 0.00    | 0.00    | 0.00    | 0.00    | 0.03    | 0.06    | 0.00    | 0.00    | 0.07     | 0.02     | 0.01     | 0.00     | 0.00     | 0.00     | 0.02     | 0.01     | 0.00     | 0.00     |
| PL13       | 0.00    | 0.00    | 0.00    | 0.00    | 0.00    | 0.00    | 0.00    | 0.00    | 0.00    | 0.00    | 0.00     | 0.00     | 0.02     | 0.04     | 0.01     | 0.02     | 0.03     | 0.03     | 0.01     | 0.00     |
| GH27       | 0.32    | 0.23    | 0.14    | 0.22    | 0.11    | 0.17    | 0.15    | 0.15    | 0.16    | 0.21    | 0.00     | 0.21     | 0.41     | 0.31     | 0.05     | 0.23     | 0.27     | 0.29     | 0.20     | 0.16     |
| GT54       | 0.00    | 0.00    | 0.00    | 0.00    | 0.00    | 0.00    | 0.00    | 0.00    | 0.00    | 0.00    | 0.00     | 0.00     | 0.00     | 0.00     | 0.00     | 0.00     | 0.00     | 0.00     | 0.00     | 0.00     |
| GT91       | 0.00    | 0.00    | 0.00    | 0.00    | 0.00    | 0.00    | 0.00    | 0.00    | 0.00    | 0.00    | 0.00     | 0.00     | 0.00     | 0.00     | 0.00     | 0.00     | 0.00     | 0.00     | 0.00     | 0.00     |
| GT72       | 0.00    | 0.00    | 0.00    | 0.00    | 0.00    | 0.00    | 0.00    | 0.00    | 0.00    | 0.00    | 0.00     | 0.00     | 0.00     | 0.00     | 0.00     | 0.00     | 0.00     | 0.00     | 0.00     | 0.00     |
| GH67       | 0.15    | 0.09    | 0.08    | 0.11    | 0.17    | 0.11    | 0.13    | 0.09    | 0.15    | 0.15    | 0.00     | 0.08     | 0.06     | 0.06     | 0.00     | 0.04     | 0.04     | 0.06     | 0.03     | 0.07     |
| GH12       | 0.00    | 0.00    | 0.00    | 0.00    | 0.00    | 0.00    | 0.00    | 0.00    | 0.02    | 0.00    | 0.00     | 0.00     | 0.00     | 0.00     | 0.00     | 0.00     | 0.00     | 0.00     | 0.00     | 0.00     |
| GH91       | 0.00    | 0.00    | 0.00    | 0.00    | 0.00    | 0.00    | 0.00    | 0.00    | 0.02    | 0.00    | 0.00     | 0.00     | 0.04     | 0.06     | 0.00     | 0.01     | 0.03     | 0.03     | 0.03     | 0.01     |
| GT69       | 0.00    | 0.00    | 0.00    | 0.00    | 0.00    | 0.00    | 0.00    | 0.00    | 0.00    | 0.00    | 0.00     | 0.00     | 0.00     | 0.00     | 0.00     | 0.00     | 0.00     | 0.00     | 0.00     | 0.00     |
| GH106      | 0.13    | 0.21    | 0.16    | 0.29    | 0.17    | 0.21    | 0.21    | 0.12    | 0.13    | 0.19    | 0.00     | 0.33     | 0.12     | 0.35     | 0.05     | 0.08     | 0.25     | 0.18     | 0.21     | 0.19     |
| GT62       | 0.00    | 0.00    | 0.00    | 0.00    | 0.00    | 0.00    | 0.00    | 0.00    | 0.00    | 0.00    | 0.00     | 0.00     | 0.00     | 0.00     | 0.00     | 0.00     | 0.00     | 0.00     | 0.00     | 0.00     |
| GH17       | 0.00    | 0.00    | 0.00    | 0.00    | 0.00    | 0.00    | 0.00    | 0.00    | 0.00    | 0.00    | 0.00     | 0.00     | 0.00     | 0.00     | 0.00     | 0.00     | 0.01     | 0.00     | 0.00     | 0.01     |
| GH88       | 0.11    | 0.16    | 0.14    | 0.07    | 0.17    | 0.13    | 0.15    | 0.09    | 0.07    | 0.10    | 0.00     | 0.08     | 0.31     | 0.45     | 0.07     | 0.17     | 0.37     | 0.32     | 0.30     | 0.18     |
| CE5        | 0.00    | 0.00    | 0.00    | 0.00    | 0.00    | 0.00    | 0.00    | 0.00    | 0.00    | 0.00    | 0.00     | 0.00     | 0.00     | 0.00     | 0.00     | 0.00     | 0.00     | 0.00     | 0.00     | 0.00     |
| GT8        | 0.11    | 0.14    | 0.02    | 0.07    | 0.17    | 0.06    | 0.06    | 0.18    | 0.31    | 0.06    | 0.35     | 0.07     | 0.12     | 0.09     | 0.01     | 0.08     | 0.07     | 0.11     | 0.07     | 0.12     |
| GT50       | 0.00    | 0.00    | 0.00    | 0.00    | 0.00    | 0.00    | 0.00    | 0.00    | 0.00    | 0.00    | 0.00     | 0.00     | 0.00     | 0.00     | 0.00     | 0.00     | 0.00     | 0.00     | 0.00     | 0.00     |
| GT20       | 0.00    | 0.00    | 0.00    | 0.00    | 0.00    | 0.00    | 0.00    | 0.03    | 0.00    | 0.00    | 0.00     | 0.02     | 0.08     | 0.09     | 0.02     | 0.03     | 0.07     | 0.09     | 0.05     | 0.07     |
| PL9        | 0.00    | 0.04    | 0.00    | 0.02    | 0.22    | 0.00    | 0.01    | 0.09    | 0.15    | 0.00    | 0.00     | 0.02     | 0.05     | 0.10     | 0.02     | 0.09     | 0.14     | 0.14     | 0.13     | 0.10     |
| GH55       | 0.00    | 0.00    | 0.00    | 0.02    | 0.06    | 0.00    | 0.00    | 0.00    | 0.00    | 0.00    | 0.00     | 0.02     | 0.01     | 0.03     | 0.00     | 0.05     | 0.03     | 0.04     | 0.01     | 0.04     |
| GH64       | 0.02    | 0.00    | 0.00    | 0.00    | 0.00    | 0.00    | 0.00    | 0.00    | 0.00    | 0.00    | 0.00     | 0.00     | 0.00     | 0.00     | 0.00     | 0.00     | 0.02     | 0.02     | 0.01     | 0.00     |
| GH127      | 0.45    | 0.26    | 0.40    | 0.24    | 0.11    | 0.28    | 0.31    | 0.39    | 0.46    | 0.27    | 0.14     | 0.39     | 0.25     | 0.34     | 0.07     | 0.20     | 0.34     | 0.30     | 0.17     | 0.19     |
| GH103      | 0.00    | 0.02    | 0.00    | 0.00    | 0.00    | 0.00    | 0.00    | 0.00    | 0.00    | 0.00    | 0.07     | 0.02     | 0.00     | 0.00     | 0.00     | 0.00     | 0.00     | 0.00     | 0.01     | 0.00     |
| GH3        | 2.61    | 2.32    | 2.34    | 2.32    | 2.13    | 2.54    | 2.14    | 1.67    | 1.93    | 2.33    | 0.71     | 2.62     | 2.73     | 3.01     | 0.64     | 2.00     | 2.59     | 2.96     | 2.33     | 2.42     |
| GT45       | 0.00    | 0.00    | 0.00    | 0.00    | 0.00    | 0.00    | 0.00    | 0.00    | 0.00    | 0.00    | 0.00     | 0.00     | 0.00     | 0.00     | 0.00     | 0.00     | 0.00     | 0.00     | 0.00     | 0.00     |
| GT74       | 0.00    | 0.00    | 0.00    | 0.00    | 0.00    | 0.00    | 0.00    | 0.00    | 0.00    | 0.00    | 0.00     | 0.00     | 0.00     | 0.00     | 0.00     | 0.00     | 0.00     | 0.00     | 0.00     | 0.00     |
| GT90       | 0.00    | 0.00    | 0.00    | 0.00    | 0.00    | 0.00    | 0.00    | 0.00    | 0.00    | 0.02    | 0.00     | 0.00     | 0.00     | 0.00     | 0.00     | 0.00     | 0.00     | 0.01     | 0.00     | 0.02     |
| GH116      | 0.00    | 0.00    | 0.00    | 0.00    | 0.00    | 0.00    | 0.00    | 0.00    | 0.00    | 0.00    | 0.00     | 0.02     | 0.02     | 0.09     | 0.02     | 0.04     | 0.05     | 0.05     | 0.05     | 0.03     |
| GH31       | 0.95    | 0.86    | 0.82    | 0.69    | 0.90    | 0.77    | 0.76    | 0.60    | 0.73    | 0.81    | 0.50     | 1.13     | 1.08     | 1.18     | 0.23     | 0.70     | 1.04     | 0.96     | 0.84     | 0.86     |
| GT12       | 0.00    | 0.00    | 0.00    | 0.00    | 0.00    | 0.00    | 0.00    | 0.00    | 0.00    | 0.00    | 0.00     | 0.00     | 0.00     | 0.00     | 0.00     | 0.00     | 0.00     | 0.00     | 0.00     | 0.00     |
| CE1        | 0.32    | 0.30    | 0.19    | 0.38    | 0.34    | 0.21    | 0.10    | 0.12    | 0.24    | 0.29    | 0.14     | 0.28     | 0.32     | 0.42     | 0.06     | 0.21     | 0.35     | 0.42     | 0.22     | 0.35     |
| GH121      | 0.00    | 0.00    | 0.00    | 0.00    | 0.00    | 0.00    | 0.00    | 0.00    | 0.02    | 0.00    | 0.00     | 0.00     | 0.00     | 0.03     | 0.00     | 0.00     | 0.00     | 0.01     | 0.00     | 0.00     |
| GH79       | 0.00    | 0.00    | 0.02    | 0.00    | 0.00    | 0.00    | 0.00    | 0.00    | 0.00    | 0.00    | 0.00     | 0.00     | 0.00     | 0.00     | 0.00     | 0.00     | 0.01     | 0.00     | 0.00     | 0.00     |
| GT73       | 0.00    | 0.00    | 0.00    | 0.00    | 0.00    | 0.00    | 0.00    | 0.03    | 0.00    | 0.00    | 0.00     | 0.00     | 0.00     | 0.00     | 0.00     | 0.00     | 0.00     | 0.00     | 0.00     | 0.00     |
| GH77       | 0.52    | 0.51    | 0.46    | 0.55    | 0.90    | 0.37    | 0.27    | 0.69    | 0.55    | 0.31    | 0.35     | 0.56     | 0.66     | 0.69     | 0.24     | 0.54     | 0.70     | 0.67     | 0.62     | 0.36     |
| PL17       | 0.00    | 0.00    | 0.00    | 0.00    | 0.00    | 0.00    | 0.00    | 0.00    | 0.00    | 0.00    | 0.00     | 0.00     | 0.00     | 0.01     | 0.00     | 0.00     | 0.00     | 0.00     | 0.01     | 0.00     |
| PL8        | 0.13    | 0.07    | 0.05    | 0.00    | 0.00    | 0.07    | 0.07    | 0.06    | 0.04    | 0.06    | 0.00     | 0.00     | 0.25     | 0.39     | 0.07     | 0.19     | 0.20     | 0.22     | 0.25     | 0.14     |

| CAZY_group | IN-CH-1 | IN-CH-2 | IN-CH-3 | IN-CH-4 | IN-CH-5 | IN-CH-6 | IN-CH-7 | IN-CH-8 | IN-CH-9 | IN-IN-1 | IN-CH-10 | IN-CH-11 | AM-AD-10 | AM-AD-11 | AM-AD-12 | AM-AD-13 | AM-AD-14 | AM-AD-15 | AM-AD-16 | AM-AD-17 |
|------------|---------|---------|---------|---------|---------|---------|---------|---------|---------|---------|----------|----------|----------|----------|----------|----------|----------|----------|----------|----------|
| CE9        | 0.26    | 0.28    | 0.16    | 0.20    | 0.45    | 0.07    | 0.15    | 0.33    | 0.31    | 0.08    | 0.21     | 0.26     | 0.30     | 0.44     | 0.14     | 0.26     | 0.38     | 0.36     | 0.34     | 0.29     |
| CE15       | 0.00    | 0.00    | 0.00    | 0.00    | 0.00    | 0.00    | 0.00    | 0.00    | 0.00    | 0.00    | 0.00     | 0.00     | 0.01     | 0.02     | 0.01     | 0.00     | 0.02     | 0.02     | 0.01     | 0.02     |
| GT79       | 0.00    | 0.00    | 0.00    | 0.00    | 0.00    | 0.00    | 0.00    | 0.00    | 0.00    | 0.00    | 0.00     | 0.00     | 0.00     | 0.00     | 0.00     | 0.00     | 0.00     | 0.00     | 0.00     | 0.00     |
| GT10       | 0.02    | 0.00    | 0.00    | 0.04    | 0.00    | 0.00    | 0.00    | 0.00    | 0.02    | 0.00    | 0.00     | 0.02     | 0.01     | 0.00     | 0.00     | 0.01     | 0.01     | 0.01     | 0.02     | 0.00     |
| GH119      | 0.00    | 0.00    | 0.00    | 0.00    | 0.00    | 0.00    | 0.00    | 0.00    | 0.00    | 0.00    | 0.00     | 0.00     | 0.00     | 0.00     | 0.00     | 0.00     | 0.00     | 0.00     | 0.00     | 0.00     |
| GH16       | 0.19    | 0.09    | 0.16    | 0.15    | 0.11    | 0.19    | 0.18    | 0.27    | 0.18    | 0.15    | 0.00     | 0.16     | 0.27     | 0.29     | 0.03     | 0.15     | 0.19     | 0.26     | 0.20     | 0.11     |
| GH43       | 2.81    | 2.06    | 2.47    | 1.39    | 1.80    | 2.52    | 1.98    | 1.58    | 2.01    | 2.27    | 0.14     | 1.92     | 2.07     | 2.68     | 0.32     | 1.00     | 1.83     | 2.14     | 1.40     | 1.37     |
| GH51       | 0.95    | 0.60    | 0.91    | 0.69    | 0.62    | 0.99    | 0.88    | 0.60    | 0.71    | 0.67    | 0.21     | 0.67     | 0.48     | 0.70     | 0.08     | 0.32     | 0.56     | 0.59     | 0.43     | 0.26     |
| GT35       | 0.60    | 1.14    | 0.55    | 0.77    | 0.90    | 0.67    | 0.50    | 0.75    | 0.57    | 0.52    | 0.50     | 0.74     | 1.35     | 1.14     | 0.36     | 0.96     | 1.33     | 1.02     | 0.99     | 0.86     |
| GT25       | 0.00    | 0.00    | 0.00    | 0.00    | 0.00    | 0.00    | 0.00    | 0.03    | 0.00    | 0.00    | 0.00     | 0.00     | 0.00     | 0.02     | 0.00     | 0.00     | 0.00     | 0.00     | 0.01     | 0.00     |
| GT2        | 4.77    | 5.19    | 4.46    | 4.80    | 4.94    | 4.35    | 3.88    | 5.55    | 4.72    | 4.43    | 3.12     | 5.46     | 5.11     | 5.28     | 1.08     | 3.65     | 4.83     | 5.06     | 4.60     | 3.26     |
| GT51       | 1.14    | 1.09    | 1.01    | 1.37    | 0.95    | 1.01    | 1.11    | 1.73    | 1.51    | 1.10    | 0.78     | 1.18     | 1.02     | 1.06     | 0.25     | 0.83     | 0.99     | 0.81     | 0.83     | 0.69     |
| GH107      | 0.00    | 0.00    | 0.00    | 0.00    | 0.00    | 0.00    | 0.00    | 0.00    | 0.00    | 0.00    | 0.00     | 0.00     | 0.00     | 0.00     | 0.00     | 0.00     | 0.00     | 0.00     | 0.00     | 0.00     |
| GH7        | 0.00    | 0.00    | 0.00    | 0.00    | 0.00    | 0.00    | 0.00    | 0.00    | 0.00    | 0.00    | 0.00     | 0.00     | 0.00     | 0.00     | 0.00     | 0.00     | 0.00     | 0.00     | 0.00     | 0.00     |
| GT7        | 0.00    | 0.00    | 0.00    | 0.00    | 0.00    | 0.00    | 0.00    | 0.00    | 0.00    | 0.00    | 0.00     | 0.00     | 0.00     | 0.00     | 0.00     | 0.00     | 0.00     | 0.00     | 0.00     | 0.00     |
| GT36       | 0.00    | 0.00    | 0.00    | 0.00    | 0.00    | 0.00    | 0.00    | 0.00    | 0.00    | 0.00    | 0.00     | 0.00     | 0.00     | 0.00     | 0.00     | 0.00     | 0.00     | 0.00     | 0.00     | 0.00     |
| PL7        | 0.00    | 0.00    | 0.00    | 0.00    | 0.00    | 0.00    | 0.00    | 0.00    | 0.00    | 0.00    | 0.00     | 0.00     | 0.00     | 0.00     | 0.00     | 0.00     | 0.00     | 0.00     | 0.00     | 0.00     |
| GH110      | 0.04    | 0.02    | 0.10    | 0.07    | 0.00    | 0.04    | 0.04    | 0.03    | 0.05    | 0.08    | 0.00     | 0.05     | 0.15     | 0.12     | 0.03     | 0.10     | 0.06     | 0.10     | 0.12     | 0.04     |
| GT21       | 0.00    | 0.00    | 0.00    | 0.00    | 0.00    | 0.00    | 0.00    | 0.00    | 0.00    | 0.00    | 0.00     | 0.00     | 0.00     | 0.00     | 0.00     | 0.00     | 0.00     | 0.00     | 0.00     | 0.00     |
| GH62       | 0.00    | 0.00    | 0.00    | 0.00    | 0.00    | 0.00    | 0.00    | 0.00    | 0.00    | 0.00    | 0.00     | 0.00     | 0.00     | 0.00     | 0.00     | 0.00     | 0.00     | 0.00     | 0.00     | 0.00     |
| GH125      | 0.09    | 0.14    | 0.16    | 0.11    | 0.06    | 0.09    | 0.07    | 0.12    | 0.11    | 0.10    | 0.07     | 0.21     | 0.17     | 0.14     | 0.03     | 0.17     | 0.13     | 0.17     | 0.14     | 0.12     |
| GH117      | 0.02    | 0.05    | 0.02    | 0.02    | 0.00    | 0.02    | 0.00    | 0.00    | 0.04    | 0.02    | 0.00     | 0.00     | 0.12     | 0.10     | 0.02     | 0.02     | 0.10     | 0.09     | 0.08     | 0.03     |
| GH68       | 0.00    | 0.00    | 0.00    | 0.00    | 0.00    | 0.00    | 0.00    | 0.00    | 0.05    | 0.00    | 0.00     | 0.00     | 0.00     | 0.00     | 0.00     | 0.00     | 0.00     | 0.00     | 0.00     | 0.00     |
| GH85       | 0.15    | 0.19    | 0.11    | 0.09    | 0.11    | 0.06    | 0.03    | 0.12    | 0.05    | 0.08    | 0.14     | 0.02     | 0.03     | 0.01     | 0.01     | 0.01     | 0.04     | 0.01     | 0.02     | 0.01     |
| GH92       | 0.93    | 1.02    | 0.98    | 1.26    | 0.62    | 0.71    | 0.60    | 0.48    | 0.69    | 0.98    | 0.00     | 0.98     | 1.45     | 2.01     | 0.28     | 0.68     | 1.52     | 1.59     | 1.33     | 0.96     |
| GH40       | 0.00    | 0.00    | 0.00    | 0.00    | 0.00    | 0.00    | 0.00    | 0.00    | 0.00    | 0.00    | 0.00     | 0.00     | 0.00     | 0.00     | 0.00     | 0.00     | 0.00     | 0.00     | 0.00     | 0.00     |
| GT49       | 0.00    | 0.00    | 0.00    | 0.00    | 0.00    | 0.00    | 0.00    | 0.00    | 0.00    | 0.00    | 0.00     | 0.00     | 0.00     | 0.00     | 0.00     | 0.00     | 0.00     | 0.00     | 0.00     | 0.01     |
| GH112      | 0.02    | 0.16    | 0.05    | 0.07    | 0.17    | 0.07    | 0.04    | 0.06    | 0.04    | 0.02    | 0.07     | 0.15     | 0.11     | 0.26     | 0.09     | 0.21     | 0.26     | 0.17     | 0.24     | 0.16     |
| GT67       | 0.00    | 0.00    | 0.00    | 0.00    | 0.00    | 0.00    | 0.00    | 0.00    | 0.00    | 0.00    | 0.00     | 0.00     | 0.00     | 0.00     | 0.00     | 0.00     | 0.00     | 0.00     | 0.00     | 0.00     |
| CE8        | 0.28    | 0.25    | 0.18    | 0.15    | 0.17    | 0.26    | 0.25    | 0.15    | 0.16    | 0.10    | 0.07     | 0.20     | 0.19     | 0.27     | 0.03     | 0.15     | 0.23     | 0.17     | 0.24     | 0.17     |
| GT86       | 0.00    | 0.00    | 0.00    | 0.00    | 0.00    | 0.00    | 0.00    | 0.00    | 0.00    | 0.00    | 0.00     | 0.00     | 0.00     | 0.00     | 0.00     | 0.00     | 0.00     | 0.00     | 0.00     | 0.00     |
| GH101      | 0.00    | 0.00    | 0.00    | 0.00    | 0.00    | 0.00    | 0.00    | 0.00    | 0.00    | 0.00    | 0.00     | 0.00     | 0.02     | 0.07     | 0.00     | 0.03     | 0.02     | 0.01     | 0.00     | 0.00     |
| GH81       | 0.00    | 0.00    | 0.00    | 0.00    | 0.00    | 0.00    | 0.00    | 0.00    | 0.00    | 0.00    | 0.00     | 0.02     | 0.00     | 0.01     | 0.00     | 0.02     | 0.01     | 0.01     | 0.01     | 0.00     |
| GT93       | 0.00    | 0.00    | 0.00    | 0.00    | 0.00    | 0.00    | 0.00    | 0.00    | 0.00    | 0.00    | 0.00     | 0.00     | 0.00     | 0.00     | 0.00     | 0.00     | 0.00     | 0.00     | 0.00     | 0.00     |
| GT63       | 0.00    | 0.00    | 0.00    | 0.00    | 0.00    | 0.00    | 0.00    | 0.00    | 0.00    | 0.00    | 0.00     | 0.00     | 0.00     | 0.00     | 0.00     | 0.00     | 0.00     | 0.00     | 0.00     | 0.00     |
| CE11       | 0.35    | 0.44    | 0.37    | 0.24    | 0.17    | 0.35    | 0.36    | 0.33    | 0.44    | 0.44    | 0.07     | 0.43     | 0.29     | 0.27     | 0.09     | 0.19     | 0.17     | 0.19     | 0.18     | 0.14     |
| GT19       | 0.32    | 0.21    | 0.21    | 0.18    | 0.17    | 0.24    | 0.22    | 0.24    | 0.31    | 0.35    | 0.07     | 0.34     | 0.14     | 0.12     | 0.03     | 0.10     | 0.11     | 0.11     | 0.10     | 0.08     |
| GT33       | 0.00    | 0.00    | 0.00    | 0.00    | 0.00    | 0.00    | 0.00    | 0.00    | 0.00    | 0.00    | 0.00     | 0.00     | 0.00     | 0.00     | 0.00     | 0.00     | 0.00     | 0.00     | 0.00     | 0.00     |
| GH21       | 0.00    | 0.00    | 0.00    | 0.00    | 0.00    | 0.00    | 0.00    | 0.00    | 0.00    | 0.00    | 0.00     | 0.00     | 0.00     | 0.00     | 0.00     | 0.00     | 0.00     | 0.00     | 0.00     | 0.00     |
| GT68       | 0.00    | 0.00    | 0.00    | 0.00    | 0.00    | 0.00    | 0.00    | 0.00    | 0.00    | 0.00    | 0.00     | 0.00     | 0.00     | 0.00     | 0.00     | 0.00     | 0.00     | 0.00     | 0.00     | 0.00     |
| GH89       | 0.24    | 0.19    | 0.22    | 0.13    | 0.06    | 0.17    | 0.14    | 0.21    | 0.16    | 0.25    | 0.00     | 0.26     | 0.24     | 0.30     | 0.07     | 0.11     | 0.25     | 0.19     | 0.21     | 0.11     |
| GT82       | 0.00    | 0.00    | 0.00    | 0.00    | 0.00    | 0.00    | 0.00    | 0.00    | 0.00    | 0.00    | 0.00     | 0.00     | 0.01     | 0.00     | 0.00     | 0.00     | 0.00     | 0.00     | 0.00     | 0.00     |
| GH30       | 0.13    | 0.16    | 0.05    | 0.07    | 0.06    | 0.15    | 0.11    | 0.15    | 0.11    | 0.10    | 0.00     | 0.15     | 0.18     | 0.27     | 0.04     | 0.07     | 0.19     | 0.35     | 0.14     | 0.14     |
| GH20       | 1.27    | 0.95    | 1.19    | 0.93    | 0.95    | 0.86    | 0.91    | 0.72    | 0.71    | 1.02    | 0.35     | 0.77     | 1.07     | 1.56     | 0.20     | 0.85     | 1.08     | 1.01     | 0.96     | 0.58     |
| GH52       | 0.00    | 0.00    | 0.00    | 0.00    | 0.00    | 0.00    | 0.00    | 0.00    | 0.00    | 0.00    | 0.00     | 0.00     | 0.00     | 0.00     | 0.00     | 0.00     | 0.00     | 0.00     | 0.00     | 0.00     |
| GT84       | 0.00    | 0.00    | 0.00    | 0.00    | 0.00    | 0.00    | 0.00    | 0.18    | 0.00    | 0.00    | 0.00     | 0.00     | 0.14     | 0.05     | 0.00     | 0.02     | 0.00     | 0.06     | 0.02     | 0.03     |
| GT15       | 0.00    | 0.00    | 0.00    | 0.00    | 0.00    | 0.00    | 0.00    | 0.00    | 0.00    | 0.00    | 0.00     | 0.00     | 0.00     | 0.00     | 0.00     | 0.00     | 0.00     | 0.00     | 0.00     | 0.00     |
| GH93       | 0.00    | 0.00    | 0.00    | 0.00    | 0.00    | 0.00    | 0.00    | 0.00    | 0.00    | 0.00    | 0.00     | 0.00     | 0.00     | 0.01     | 0.01     | 0.00     | 0.00     | 0.00     | 0.01     | 0.00     |
| PL16       | 0.00    | 0.00    | 0.00    | 0.00    | 0.00    | 0.00    | 0.00    | 0.00    | 0.00    | 0.00    | 0.00     | 0.00     | 0.00     | 0.00     | 0.00     | 0.00     | 0.00     | 0.00     | 0.00     | 0.00     |
| GH26       | 0.11    | 0.12    | 0.06    | 0.11    | 0.00    | 0.09    | 0.07    | 0.06    | 0.15    | 0.02    | 0.00     | 0.13     | 0.15     | 0.14     | 0.02     | 0.14     | 0.18     | 0.17     | 0.09     | 0.15     |



| CAZY_group | IN-CH-1 | IN-CH-2 | IN-CH-3 | IN-CH-4 | IN-CH-5 | IN-CH-6 | IN-CH-7 | IN-CH-8 | IN-CH-9 | IN-IN-1 | IN-CH-10 | IN-CH-11 | AM-AD-10 | AM-AD-11 | AM-AD-12 | AM-AD-13 | AM-AD-14 | AM-AD-15 | AM-AD-16 | AM-AD-17 |
|------------|---------|---------|---------|---------|---------|---------|---------|---------|---------|---------|----------|----------|----------|----------|----------|----------|----------|----------|----------|----------|
| GT75       | 0.00    | 0.00    | 0.00    | 0.00    | 0.00    | 0.00    | 0.00    | 0.00    | 0.00    | 0.00    | 0.00     | 0.00     | 0.00     | 0.00     | 0.00     | 0.00     | 0.00     | 0.00     | 0.00     | 0.00     |
| GH53       | 0.24    | 0.18    | 0.10    | 0.11    | 0.11    | 0.11    | 0.17    | 0.33    | 0.27    | 0.12    | 0.00     | 0.20     | 0.22     | 0.15     | 0.05     | 0.12     | 0.23     | 0.12     | 0.10     | 0.12     |
| GT88       | 0.00    | 0.00    | 0.00    | 0.00    | 0.00    | 0.00    | 0.00    | 0.00    | 0.00    | 0.00    | 0.00     | 0.00     | 0.00     | 0.00     | 0.00     | 0.00     | 0.00     | 0.00     | 0.00     | 0.00     |
| GT24       | 0.00    | 0.00    | 0.00    | 0.00    | 0.00    | 0.00    | 0.00    | 0.00    | 0.00    | 0.00    | 0.00     | 0.00     | 0.00     | 0.00     | 0.00     | 0.00     | 0.00     | 0.00     | 0.00     | 0.01     |
| GT81       | 0.00    | 0.00    | 0.00    | 0.00    | 0.00    | 0.00    | 0.00    | 0.00    | 0.00    | 0.00    | 0.00     | 0.00     | 0.00     | 0.00     | 0.00     | 0.00     | 0.00     | 0.00     | 0.00     | 0.00     |
| GH4        | 0.00    | 0.05    | 0.03    | 0.02    | 0.06    | 0.00    | 0.04    | 0.36    | 0.18    | 0.02    | 0.35     | 0.23     | 0.14     | 0.15     | 0.04     | 0.09     | 0.09     | 0.16     | 0.10     | 0.11     |
| GT78       | 0.00    | 0.00    | 0.00    | 0.00    | 0.00    | 0.00    | 0.00    | 0.00    | 0.00    | 0.00    | 0.00     | 0.00     | 0.00     | 0.00     | 0.00     | 0.00     | 0.00     | 0.00     | 0.00     | 0.00     |
| GH8        | 0.15    | 0.11    | 0.10    | 0.07    | 0.06    | 0.06    | 0.06    | 0.12    | 0.02    | 0.08    | 0.07     | 0.08     | 0.11     | 0.06     | 0.01     | 0.05     | 0.05     | 0.07     | 0.05     | 0.05     |
| GH70       | 0.00    | 0.02    | 0.00    | 0.00    | 0.00    | 0.00    | 0.00    | 0.27    | 0.42    | 0.00    | 0.00     | 0.00     | 0.00     | 0.00     | 0.00     | 0.00     | 0.00     | 0.00     | 0.00     | 0.00     |
| GH122      | 0.00    | 0.00    | 0.00    | 0.00    | 0.00    | 0.00    | 0.00    | 0.00    | 0.00    | 0.00    | 0.00     | 0.00     | 0.00     | 0.00     | 0.00     | 0.00     | 0.00     | 0.00     | 0.00     | 0.00     |
| GH74       | 0.00    | 0.00    | 0.03    | 0.04    | 0.00    | 0.00    | 0.00    | 0.00    | 0.00    | 0.00    | 0.00     | 0.00     | 0.05     | 0.02     | 0.00     | 0.03     | 0.06     | 0.02     | 0.02     | 0.05     |
| GT41       | 0.00    | 0.00    | 0.00    | 0.00    | 0.00    | 0.00    | 0.00    | 0.03    | 0.00    | 0.00    | 0.00     | 0.08     | 0.01     | 0.01     | 0.01     | 0.00     | 0.01     | 0.01     | 0.02     | 0.01     |
| PL1        | 0.13    | 0.07    | 0.10    | 0.18    | 0.34    | 0.21    | 0.11    | 0.09    | 0.24    | 0.12    | 0.00     | 0.11     | 0.27     | 0.38     | 0.04     | 0.17     | 0.34     | 0.41     | 0.17     | 0.21     |
| GH15       | 0.00    | 0.00    | 0.00    | 0.00    | 0.00    | 0.00    | 0.00    | 0.00    | 0.00    | 0.00    | 0.00     | 0.00     | 0.04     | 0.08     | 0.00     | 0.00     | 0.03     | 0.07     | 0.02     | 0.04     |
| GH32       | 0.71    | 0.51    | 0.67    | 0.33    | 0.79    | 0.58    | 0.48    | 0.98    | 0.75    | 0.62    | 0.21     | 0.49     | 0.50     | 0.60     | 0.08     | 0.35     | 0.58     | 0.47     | 0.32     | 0.26     |
| GH44       | 0.00    | 0.00    | 0.00    | 0.00    | 0.00    | 0.00    | 0.00    | 0.00    | 0.00    | 0.00    | 0.00     | 0.00     | 0.01     | 0.01     | 0.00     | 0.00     | 0.01     | 0.00     | 0.00     | 0.00     |
| GT6        | 0.00    | 0.00    | 0.00    | 0.00    | 0.00    | 0.00    | 0.00    | 0.00    | 0.00    | 0.00    | 0.00     | 0.00     | 0.01     | 0.02     | 0.01     | 0.00     | 0.01     | 0.01     | 0.01     | 0.00     |
| GH13       | 3.09    | 3.82    | 2.31    | 3.87    | 3.59    | 2.63    | 2.34    | 4.06    | 3.57    | 2.62    | 1.92     | 3.00     | 3.47     | 3.86     | 1.01     | 2.84     | 3.81     | 3.38     | 3.08     | 2.76     |
| GT80       | 0.00    | 0.00    | 0.00    | 0.00    | 0.06    | 0.00    | 0.01    | 0.03    | 0.00    | 0.00    | 0.14     | 0.03     | 0.02     | 0.01     | 0.01     | 0.03     | 0.04     | 0.03     | 0.02     | 0.01     |
| GH71       | 0.00    | 0.00    | 0.00    | 0.00    | 0.00    | 0.00    | 0.00    | 0.00    | 0.00    | 0.00    | 0.00     | 0.00     | 0.00     | 0.00     | 0.00     | 0.00     | 0.00     | 0.00     | 0.00     | 0.00     |
| GH63       | 0.06    | 0.12    | 0.08    | 0.09    | 0.28    | 0.06    | 0.03    | 0.15    | 0.02    | 0.02    | 0.07     | 0.02     | 0.04     | 0.09     | 0.02     | 0.06     | 0.09     | 0.09     | 0.04     | 0.14     |
| PL21       | 0.00    | 0.00    | 0.00    | 0.00    | 0.00    | 0.00    | 0.00    | 0.00    | 0.00    | 0.00    | 0.00     | 0.00     | 0.00     | 0.03     | 0.00     | 0.00     | 0.01     | 0.00     | 0.01     | 0.00     |
| GH65       | 0.00    | 0.02    | 0.00    | 0.02    | 0.06    | 0.04    | 0.03    | 0.15    | 0.05    | 0.00    | 0.07     | 0.10     | 0.18     | 0.21     | 0.06     | 0.11     | 0.18     | 0.23     | 0.22     | 0.19     |
| CE4        | 0.39    | 0.44    | 0.32    | 0.51    | 0.45    | 0.30    | 0.39    | 0.54    | 0.31    | 0.29    | 0.14     | 0.44     | 0.73     | 0.72     | 0.16     | 0.53     | 0.77     | 0.62     | 0.57     | 0.52     |
| CE14       | 0.00    | 0.02    | 0.00    | 0.00    | 0.00    | 0.00    | 0.01    | 0.00    | 0.04    | 0.00    | 0.00     | 0.03     | 0.02     | 0.03     | 0.00     | 0.01     | 0.01     | 0.01     | 0.01     | 0.00     |
| GH115      | 0.22    | 0.25    | 0.35    | 0.15    | 0.06    | 0.17    | 0.29    | 0.15    | 0.22    | 0.19    | 0.00     | 0.16     | 0.24     | 0.33     | 0.04     | 0.17     | 0.23     | 0.25     | 0.12     | 0.22     |
| GH104      | 0.00    | 0.00    | 0.00    | 0.00    | 0.00    | 0.00    | 0.03    | 0.06    | 0.00    | 0.00    | 0.00     | 0.00     | 0.00     | 0.00     | 0.00     | 0.00     | 0.00     | 0.00     | 0.00     | 0.00     |
| GH111      | 0.00    | 0.00    | 0.00    | 0.00    | 0.00    | 0.00    | 0.00    | 0.00    | 0.00    | 0.00    | 0.00     | 0.00     | 0.00     | 0.00     | 0.00     | 0.00     | 0.00     | 0.00     | 0.00     | 0.00     |
| GH95       | 0.82    | 0.49    | 0.82    | 0.60    | 0.67    | 0.62    | 0.70    | 0.45    | 0.46    | 0.83    | 0.00     | 0.44     | 0.62     | 0.82     | 0.09     | 0.29     | 0.50     | 0.48     | 0.49     | 0.36     |
| GT70       | 0.00    | 0.00    | 0.00    | 0.00    | 0.00    | 0.00    | 0.00    | 0.00    | 0.00    | 0.00    | 0.00     | 0.00     | 0.00     | 0.00     | 0.00     | 0.00     | 0.00     | 0.00     | 0.00     | 0.00     |
| CE10       | 0.02    | 0.05    | 0.05    | 0.09    | 0.06    | 0.04    | 0.03    | 0.06    | 0.09    | 0.06    | 0.28     | 0.16     | 0.12     | 0.15     | 0.04     | 0.17     | 0.12     | 0.25     | 0.17     | 0.19     |
| GH10       | 0.24    | 0.16    | 0.24    | 0.11    | 0.06    | 0.06    | 0.13    | 0.15    | 0.13    | 0.23    | 0.00     | 0.18     | 0.14     | 0.15     | 0.01     | 0.06     | 0.15     | 0.17     | 0.07     | 0.10     |
| GH130      | 0.24    | 0.25    | 0.24    | 0.27    | 0.17    | 0.28    | 0.24    | 0.15    | 0.22    | 0.15    | 0.00     | 0.29     | 0.38     | 0.41     | 0.07     | 0.14     | 0.34     | 0.30     | 0.23     | 0.16     |
| PL20       | 0.00    | 0.00    | 0.00    | 0.00    | 0.00    | 0.00    | 0.00    | 0.00    | 0.00    | 0.00    | 0.00     | 0.00     | 0.00     | 0.00     | 0.00     | 0.00     | 0.00     | 0.00     | 0.00     | 0.00     |
| GH69       | 0.00    | 0.00    | 0.00    | 0.00    | 0.00    | 0.00    | 0.00    | 0.00    | 0.00    | 0.00    | 0.00     | 0.00     | 0.00     | 0.00     | 0.00     | 0.00     | 0.00     | 0.00     | 0.00     | 0.00     |
| PL2        | 0.00    | 0.00    | 0.00    | 0.00    | 0.00    | 0.00    | 0.00    | 0.00    | 0.00    | 0.00    | 0.00     | 0.00     | 0.00     | 0.00     | 0.00     | 0.00     | 0.00     | 0.00     | 0.00     | 0.00     |
| GH49       | 0.00    | 0.00    | 0.00    | 0.00    | 0.00    | 0.00    | 0.00    | 0.00    | 0.00    | 0.00    | 0.00     | 0.00     | 0.00     | 0.00     | 0.00     | 0.00     | 0.00     | 0.00     | 0.00     | 0.00     |
| GH25       | 0.71    | 0.77    | 0.77    | 0.55    | 0.84    | 0.77    | 0.77    | 1.07    | 1.00    | 0.75    | 0.00     | 0.66     | 0.43     | 0.48     | 0.14     | 0.32     | 0.45     | 0.44     | 0.46     | 0.42     |
| GH59       | 0.00    | 0.00    | 0.00    | 0.00    | 0.00    | 0.00    | 0.00    | 0.00    | 0.00    | 0.00    | 0.00     | 0.00     | 0.06     | 0.02     | 0.00     | 0.02     | 0.02     | 0.02     | 0.02     | 0.03     |
| GH35       | 0.35    | 0.25    | 0.38    | 0.22    | 0.28    | 0.32    | 0.36    | 0.21    | 0.20    | 0.25    | 0.21     | 0.29     | 0.37     | 0.41     | 0.05     | 0.23     | 0.35     | 0.29     | 0.30     | 0.19     |
| GT39       | 0.00    | 0.02    | 0.00    | 0.00    | 0.00    | 0.00    | 0.00    | 0.00    | 0.00    | 0.00    | 0.00     | 0.00     | 0.01     | 0.01     | 0.01     | 0.02     | 0.01     | 0.00     | 0.02     | 0.01     |
| GT57       | 0.00    | 0.00    | 0.00    | 0.00    | 0.00    | 0.00    | 0.00    | 0.00    | 0.00    | 0.00    | 0.00     | 0.00     | 0.00     | 0.00     | 0.00     | 0.00     | 0.00     | 0.00     | 0.00     | 0.00     |
| GH129      | 0.00    | 0.00    | 0.00    | 0.00    | 0.00    | 0.00    | 0.00    | 0.00    | 0.00    | 0.00    | 0.07     | 0.00     | 0.00     | 0.00     | 0.00     | 0.00     | 0.02     | 0.01     | 0.00     | 0.00     |
| GT22       | 0.00    | 0.00    | 0.00    | 0.00    | 0.00    | 0.00    | 0.00    | 0.00    | 0.00    | 0.00    | 0.00     | 0.00     | 0.00     | 0.00     | 0.00     | 0.00     | 0.00     | 0.00     | 0.00     | 0.03     |
| PL12       | 0.02    | 0.02    | 0.02    | 0.02    | 0.00    | 0.02    | 0.00    | 0.00    | 0.00    | 0.02    | 0.00     | 0.02     | 0.09     | 0.19     | 0.02     | 0.03     | 0.11     | 0.09     | 0.07     | 0.00     |
| PL18       | 0.00    | 0.00    | 0.00    | 0.00    | 0.00    | 0.00    | 0.00    | 0.00    | 0.00    | 0.00    | 0.00     | 0.00     | 0.00     | 0.00     | 0.00     | 0.00     | 0.00     | 0.00     | 0.00     | 0.00     |
| GT92       | 0.00    | 0.00    | 0.00    | 0.00    | 0.00    | 0.00    | 0.00    | 0.00    | 0.00    | 0.00    | 0.00     | 0.00     | 0.00     | 0.00     | 0.00     | 0.00     | 0.00     | 0.00     | 0.00     | 0.00     |
| GT44       | 0.00    | 0.00    | 0.00    | 0.00    | 0.00    | 0.00    | 0.00    | 0.00    | 0.00    | 0.00    | 0.00     | 0.00     | 0.01     | 0.00     | 0.00     | 0.00     | 0.00     | 0.00     | 0.00     | 0.00     |
| GT29       | 0.00    | 0.00    | 0.00    | 0.00    | 0.00    | 0.00    | 0.00    | 0.00    | 0.00    | 0.00    | 0.00     | 0.00     | 0.00     | 0.00     | 0.00     | 0.00     | 0.00     | 0.00     | 0.00     | 0.00     |
| GT13       | 0.00    | 0.00    | 0.00    | 0.00    | 0.00    | 0.00    | 0.00    | 0.00    | 0.00    | 0.00    | 0.00     | 0.00     | 0.00     | 0.00     | 0.00     | 0.00     | 0.00     | 0.01     | 0.00     | 0.01     |

| CAZY_group | IN-CH-1 | IN-CH-2 | IN-CH-3 | IN-CH-4 | IN-CH-5 | IN-CH-6 | IN-CH-7 | IN-CH-8 | IN-CH-9 | IN-IN-1 | IN-CH-10 | IN-CH-11 | AM-AD-10 | AM-AD-11 | AM-AD-12 | AM-AD-13 | AM-AD-14 | AM-AD-15 | AM-AD-16 | AM-AD-17 |
|------------|---------|---------|---------|---------|---------|---------|---------|---------|---------|---------|----------|----------|----------|----------|----------|----------|----------|----------|----------|----------|
| GT52       | 0.00    | 0.00    | 0.00    | 0.00    | 0.00    | 0.00    | 0.00    | 0.00    | 0.00    | 0.00    | 0.00     | 0.00     | 0.00     | 0.00     | 0.00     | 0.00     | 0.00     | 0.00     | 0.00     | 0.00     |
| GT64       | 0.00    | 0.00    | 0.00    | 0.00    | 0.00    | 0.00    | 0.00    | 0.00    | 0.00    | 0.00    | 0.00     | 0.00     | 0.00     | 0.00     | 0.00     | 0.00     | 0.00     | 0.00     | 0.00     | 0.00     |
| GT85       | 0.00    | 0.00    | 0.00    | 0.00    | 0.00    | 0.00    | 0.00    | 0.00    | 0.00    | 0.00    | 0.00     | 0.00     | 0.00     | 0.00     | 0.00     | 0.00     | 0.00     | 0.00     | 0.00     | 0.00     |
| GT16       | 0.00    | 0.00    | 0.00    | 0.00    | 0.00    | 0.00    | 0.00    | 0.00    | 0.00    | 0.00    | 0.00     | 0.00     | 0.00     | 0.00     | 0.00     | 0.00     | 0.00     | 0.00     | 0.00     | 0.00     |
| GH56       | 0.00    | 0.00    | 0.00    | 0.00    | 0.00    | 0.00    | 0.00    | 0.00    | 0.00    | 0.00    | 0.00     | 0.00     | 0.00     | 0.00     | 0.00     | 0.00     | 0.00     | 0.00     | 0.00     | 0.00     |
| GT60       | 0.00    | 0.00    | 0.00    | 0.00    | 0.00    | 0.00    | 0.00    | 0.00    | 0.00    | 0.00    | 0.00     | 0.00     | 0.00     | 0.00     | 0.00     | 0.00     | 0.00     | 0.00     | 0.00     | 0.00     |
| GH41       | 0.00    | 0.00    | 0.00    | 0.00    | 0.00    | 0.00    | 0.00    | 0.00    | 0.00    | 0.00    | 0.00     | 0.00     | 0.00     | 0.00     | 0.00     | 0.00     | 0.00     | 0.00     | 0.00     | 0.00     |
| CE7        | 0.15    | 0.12    | 0.24    | 0.13    | 0.34    | 0.21    | 0.22    | 0.30    | 0.22    | 0.12    | 0.00     | 0.13     | 0.05     | 0.13     | 0.02     | 0.04     | 0.10     | 0.09     | 0.05     | 0.07     |
| GH39       | 0.02    | 0.02    | 0.00    | 0.00    | 0.00    | 0.00    | 0.00    | 0.00    | 0.02    | 0.00    | 0.00     | 0.05     | 0.07     | 0.06     | 0.01     | 0.01     | 0.05     | 0.05     | 0.03     | 0.04     |
| GT30       | 0.37    | 0.28    | 0.42    | 0.31    | 0.28    | 0.26    | 0.25    | 0.36    | 0.33    | 0.48    | 0.14     | 0.43     | 0.29     | 0.24     | 0.05     | 0.19     | 0.19     | 0.21     | 0.19     | 0.19     |
| PL15       | 0.02    | 0.09    | 0.02    | 0.00    | 0.00    | 0.04    | 0.00    | 0.00    | 0.00    | 0.04    | 0.00     | 0.03     | 0.05     | 0.12     | 0.02     | 0.03     | 0.13     | 0.06     | 0.08     | 0.02     |
| GH102      | 0.00    | 0.02    | 0.02    | 0.00    | 0.00    | 0.02    | 0.03    | 0.06    | 0.04    | 0.02    | 0.14     | 0.02     | 0.00     | 0.00     | 0.01     | 0.00     | 0.00     | 0.00     | 0.02     | 0.00     |

| CAZY_group | AM-AD-18 | AM-AD-19 | AM-AD-20 | AM-AD-21 | AM-AD-22 | AM-AD-23 | AM-AD-24 | AM-AD-25 | AM-AD-26 | AM-AD-27 | AM-AD-28 | AM-AD-29 | AM-AD-3 | AM-AD-30 | AM-AD-31 | AM-AD-32 | AM-AD-33 |
|------------|----------|----------|----------|----------|----------|----------|----------|----------|----------|----------|----------|----------|---------|----------|----------|----------|----------|
| GH29       | 0.67     | 0.74     | 0.36     | 0.64     | 0.72     | 0.83     | 0.85     | 1.15     | 0.62     | 0.89     | 0.75     | 0.97     | 0.95    | 1.07     | 1.03     | 0.58     | 0.64     |
| PL4        | 0.00     | 0.00     | 0.00     | 0.01     | 0.00     | 0.01     | 0.00     | 0.00     | 0.00     | 0.02     | 0.00     | 0.00     | 0.00    | 0.01     | 0.00     | 0.01     | 0.00     |
| GH23       | 1.22     | 1.23     | 1.30     | 1.10     | 1.16     | 1.24     | 1.45     | 1.46     | 1.34     | 1.20     | 1.45     | 1.90     | 1.16    | 1.20     | 1.31     | 1.41     | 1.33     |
| CE6        | 0.00     | 0.06     | 0.03     | 0.02     | 0.04     | 0.04     | 0.04     | 0.06     | 0.01     | 0.03     | 0.06     | 0.06     | 0.05    | 0.07     | 0.03     | 0.03     | 0.04     |
| GH72       | 0.14     | 0.14     | 0.22     | 0.13     | 0.15     | 0.16     | 0.20     | 0.09     | 0.12     | 0.16     | 0.21     | 0.25     | 0.15    | 0.15     | 0.24     | 0.04     | 0.11     |
| GH114      | 0.00     | 0.00     | 0.00     | 0.00     | 0.00     | 0.00     | 0.00     | 0.00     | 0.01     | 0.00     | 0.00     | 0.00     | 0.00    | 0.00     | 0.00     | 0.00     | 0.00     |
| GH78       | 0.77     | 0.94     | 0.50     | 1.01     | 1.23     | 0.93     | 1.14     | 1.59     | 0.62     | 1.39     | 0.91     | 1.04     | 1.10    | 1.48     | 1.63     | 0.89     | 0.94     |
| PL19       | 0.00     | 0.00     | 0.00     | 0.00     | 0.00     | 0.00     | 0.00     | 0.00     | 0.00     | 0.00     | 0.00     | 0.00     | 0.00    | 0.00     | 0.00     | 0.00     | 0.00     |
| GT27       | 0.00     | 0.00     | 0.01     | 0.00     | 0.00     | 0.00     | 0.00     | 0.00     | 0.00     | 0.00     | 0.00     | 0.00     | 0.00    | 0.00     | 0.00     | 0.00     | 0.00     |
| GH5        | 0.28     | 0.32     | 0.41     | 0.39     | 0.60     | 0.74     | 0.33     | 0.23     | 0.17     | 0.76     | 0.58     | 0.60     | 0.59    | 0.98     | 0.74     | 0.63     | 0.50     |
| GT40       | 0.00     | 0.00     | 0.00     | 0.00     | 0.00     | 0.00     | 0.00     | 0.00     | 0.00     | 0.00     | 0.00     | 0.00     | 0.00    | 0.00     | 0.00     | 0.00     | 0.00     |
| CE13       | 0.01     | 0.00     | 0.01     | 0.00     | 0.00     | 0.00     | 0.00     | 0.00     | 0.00     | 0.00     | 0.00     | 0.00     | 0.00    | 0.00     | 0.01     | 0.00     | 0.00     |
| GT37       | 0.00     | 0.00     | 0.00     | 0.00     | 0.00     | 0.00     | 0.00     | 0.00     | 0.00     | 0.00     | 0.00     | 0.00     | 0.00    | 0.00     | 0.00     | 0.00     | 0.00     |
| GH33       | 0.15     | 0.28     | 0.11     | 0.23     | 0.23     | 0.31     | 0.30     | 0.27     | 0.20     | 0.28     | 0.30     | 0.42     | 0.25    | 0.40     | 0.30     | 0.22     | 0.24     |
| GT65       | 0.00     | 0.00     | 0.00     | 0.00     | 0.00     | 0.00     | 0.00     | 0.00     | 0.00     | 0.00     | 0.00     | 0.00     | 0.00    | 0.00     | 0.00     | 0.00     | 0.00     |
| GH86       | 0.00     | 0.01     | 0.00     | 0.01     | 0.01     | 0.00     | 0.00     | 0.00     | 0.00     | 0.00     | 0.00     | 0.03     | 0.00    | 0.00     | 0.01     | 0.00     | 0.00     |
| GH123      | 0.11     | 0.15     | 0.04     | 0.11     | 0.15     | 0.11     | 0.23     | 0.22     | 0.17     | 0.16     | 0.09     | 0.14     | 0.15    | 0.23     | 0.16     | 0.16     | 0.12     |
| GH96       | 0.00     | 0.00     | 0.00     | 0.00     | 0.00     | 0.00     | 0.00     | 0.00     | 0.00     | 0.00     | 0.00     | 0.00     | 0.00    | 0.00     | 0.00     | 0.00     | 0.00     |
| GH14       | 0.00     | 0.00     | 0.00     | 0.00     | 0.00     | 0.00     | 0.00     | 0.00     | 0.00     | 0.00     | 0.00     | 0.00     | 0.00    | 0.00     | 0.00     | 0.00     | 0.00     |
| CE3        | 0.02     | 0.00     | 0.00     | 0.00     | 0.00     | 0.00     | 0.00     | 0.00     | 0.00     | 0.00     | 0.00     | 0.00     | 0.00    | 0.00     | 0.01     | 0.00     | 0.00     |
| PL10       | 0.03     | 0.13     | 0.06     | 0.07     | 0.12     | 0.14     | 0.18     | 0.10     | 0.11     | 0.12     | 0.08     | 0.11     | 0.09    | 0.15     | 0.11     | 0.10     | 0.06     |
| GT48       | 0.00     | 0.00     | 0.00     | 0.00     | 0.00     | 0.00     | 0.00     | 0.00     | 0.00     | 0.00     | 0.00     | 0.00     | 0.00    | 0.00     | 0.00     | 0.00     | 0.00     |
| PL6        | 0.00     | 0.01     | 0.00     | 0.00     | 0.02     | 0.00     | 0.01     | 0.00     | 0.00     | 0.01     | 0.00     | 0.00     | 0.00    | 0.00     | 0.00     | 0.00     | 0.00     |
| GT83       | 0.08     | 0.15     | 0.06     | 0.07     | 0.11     | 0.04     | 0.21     | 0.11     | 0.04     | 0.11     | 0.15     | 0.17     | 0.12    | 0.14     | 0.09     | 0.12     | 0.10     |
| GH126      | 0.00     | 0.00     | 0.00     | 0.00     | 0.00     | 0.00     | 0.00     | 0.00     | 0.00     | 0.00     | 0.00     | 0.00     | 0.00    | 0.00     | 0.00     | 0.00     | 0.00     |
| GH9        | 0.19     | 0.07     | 0.17     | 0.15     | 0.20     | 0.14     | 0.14     | 0.14     | 0.15     | 0.37     | 0.28     | 0.33     | 0.33    | 0.28     | 0.23     | 0.14     | 0.24     |
| GH75       | 0.00     | 0.00     | 0.00     | 0.00     | 0.00     | 0.00     | 0.00     | 0.00     | 0.00     | 0.00     | 0.00     | 0.00     | 0.00    | 0.00     | 0.00     | 0.00     | 0.00     |
| GT71       | 0.00     | 0.00     | 0.00     | 0.00     | 0.00     | 0.00     | 0.00     | 0.00     | 0.00     | 0.00     | 0.00     | 0.00     | 0.00    | 0.00     | 0.00     | 0.00     | 0.00     |
| GH46       | 0.00     | 0.00     | 0.00     | 0.00     | 0.00     | 0.00     | 0.00     | 0.00     | 0.00     | 0.01     | 0.00     | 0.00     | 0.00    | 0.00     | 0.00     | 0.00     | 0.00     |
| GT61       | 0.00     | 0.00     | 0.00     | 0.00     | 0.00     | 0.00     | 0.00     | 0.00     | 0.00     | 0.00     | 0.00     | 0.00     | 0.00    | 0.00     | 0.00     | 0.00     | 0.00     |
| GT3        | 0.11     | 0.22     | 0.03     | 0.20     | 0.24     | 0.13     | 0.44     | 0.19     | 0.36     | 0.30     | 0.29     | 0.36     | 0.28    | 0.17     | 0.31     | 0.24     | 0.35     |
| PL3        | 0.00     | 0.00     | 0.00     | 0.00     | 0.00     | 0.00     | 0.00     | 0.00     | 0.00     | 0.00     | 0.00     | 0.01     | 0.00    | 0.00     | 0.00     | 0.01     | 0.00     |
| GH108      | 0.04     | 0.06     | 0.02     | 0.02     | 0.04     | 0.03     | 0.04     | 0.07     | 0.01     | 0.03     | 0.01     | 0.03     | 0.02    | 0.06     | 0.04     | 0.02     | 0.03     |
| GT56       | 0.00     | 0.00     | 0.00     | 0.00     | 0.00     | 0.00     | 0.00     | 0.00     | 0.00     | 0.00     | 0.00     | 0.01     | 0.00    | 0.00     | 0.00     | 0.02     | 0.00     |
| PL11       | 0.10     | 0.22     | 0.09     | 0.14     | 0.10     | 0.25     | 0.21     | 0.22     | 0.12     | 0.22     | 0.09     | 0.18     | 0.11    | 0.30     | 0.21     | 0.29     | 0.13     |
| GH45       | 0.00     | 0.00     | 0.00     | 0.01     | 0.00     | 0.00     | 0.01     | 0.00     | 0.00     | 0.00     | 0.00     | 0.00     | 0.00    | 0.00     | 0.00     | 0.00     | 0.00     |
| GT34       | 0.00     | 0.00     | 0.00     | 0.00     | 0.00     | 0.00     | 0.00     | 0.00     | 0.00     | 0.00     | 0.00     | 0.03     | 0.00    | 0.00     | 0.00     | 0.00     | 0.01     |
| PL14       | 0.00     | 0.00     | 0.00     | 0.00     | 0.00     | 0.00     | 0.00     | 0.00     | 0.00     | 0.00     | 0.00     | 0.00     | 0.00    | 0.00     | 0.00     | 0.00     | 0.00     |
| GH19       | 0.01     | 0.00     | 0.01     | 0.01     | 0.01     | 0.02     | 0.00     | 0.01     | 0.01     | 0.01     | 0.01     | 0.01     | 0.01    | 0.01     | 0.01     | 0.04     | 0.00     |
| GH118      | 0.00     | 0.00     | 0.00     | 0.00     | 0.00     | 0.00     | 0.00     | 0.00     | 0.00     | 0.00     | 0.00     | 0.00     | 0.00    | 0.00     | 0.00     | 0.00     | 0.00     |
| GH82       | 0.00     | 0.00     | 0.00     | 0.00     | 0.00     | 0.00     | 0.00     | 0.00     | 0.00     | 0.00     | 0.00     | 0.00     | 0.00    | 0.00     | 0.00     | 0.00     | 0.00     |
| GH76       | 0.09     | 0.13     | 0.07     | 0.19     | 0.28     | 0.29     | 0.26     | 0.55     | 0.06     | 0.27     | 0.26     | 0.34     | 0.26    | 0.28     | 0.20     | 0.17     | 0.24     |
| GT4        | 1.63     | 2.09     | 2.01     | 1.95     | 2.48     | 2.38     | 2.37     | 2.28     | 2.22     | 2.58     | 2.50     | 2.97     | 2.60    | 2.28     | 2.74     | 2.17     | 2.10     |
| GT87       | 0.01     | 0.01     | 0.00     | 0.01     | 0.01     | 0.02     | 0.01     | 0.00     | 0.00     | 0.00     | 0.01     | 0.00     | 0.01    | 0.01     | 0.01     | 0.00     | 0.00     |
| GH24       | 0.10     | 0.13     | 0.09     | 0.13     | 0.13     | 0.07     | 0.18     | 0.30     | 0.20     | 0.14     | 0.12     | 0.13     | 0.10    | 0.23     | 0.12     | 0.21     | 0.15     |
| GH90       | 0.00     | 0.00     | 0.00     | 0.00     | 0.00     | 0.00     | 0.00     | 0.00     | 0.00     | 0.00     | 0.00     | 0.00     | 0.00    | 0.00     | 0.00     | 0.00     | 0.00     |
| GH57       | 0.06     | 0.11     | 0.03     | 0.23     | 0.15     | 0.16     | 0.34     | 0.22     | 0.25     | 0.19     | 0.13     | 0.25     | 0.26    | 0.18     | 0.17     | 0.10     | 0.17     |
| GH36       | 0.73     | 0.67     | 1.02     | 0.66     | 0.99     | 0.96     | 0.86     | 0.80     | 0.69     | 1.10     | 1.04     | 1.26     | 1.00    | 1.01     | 1.26     | 0.97     | 0.76     |
| GT46       | 0.00     | 0.00     | 0.00     | 0.00     | 0.00     | 0.00     | 0.00     | 0.00     | 0.00     | 0.00     | 0.00     | 0.00     | 0.00    | 0.00     | 0.00     | 0.00     | 0.00     |
| GH66       | 0.02     | 0.03     | 0.01     | 0.03     | 0.08     | 0.05     | 0.02     | 0.11     | 0.02     | 0.08     | 0.00     | 0.05     | 0.07    | 0.05     | 0.04     | 0.01     | 0.04     |



| CAZY_group | AM-AD-18 | AM-AD-19 | AM-AD-20 | AM-AD-21 | AM-AD-22 | AM-AD-23 | AM-AD-24 | AM-AD-25 | AM-AD-26 | AM-AD-27 | AM-AD-28 | AM-AD-29 | AM-AD-3 | AM-AD-30 | AM-AD-31 | AM-AD-32 | AM-AD-33 |
|------------|----------|----------|----------|----------|----------|----------|----------|----------|----------|----------|----------|----------|---------|----------|----------|----------|----------|
| GT76       | 0.00     | 0.00     | 0.01     | 0.00     | 0.00     | 0.00     | 0.00     | 0.00     | 0.00     | 0.00     | 0.00     | 0.00     | 0.00    | 0.00     | 0.00     | 0.00     | 0.00     |
| GT32       | 0.04     | 0.06     | 0.07     | 0.08     | 0.14     | 0.11     | 0.08     | 0.11     | 0.06     | 0.12     | 0.15     | 0.13     | 0.21    | 0.12     | 0.11     | 0.06     | 0.11     |
| GT47       | 0.06     | 0.07     | 0.07     | 0.08     | 0.09     | 0.04     | 0.04     | 0.01     | 0.07     | 0.08     | 0.09     | 0.10     | 0.08    | 0.12     | 0.11     | 0.10     | 0.07     |
| GH84       | 0.09     | 0.09     | 0.05     | 0.09     | 0.11     | 0.19     | 0.11     | 0.14     | 0.06     | 0.11     | 0.26     | 0.25     | 0.09    | 0.13     | 0.13     | 0.09     | 0.10     |
| GH83       | 0.00     | 0.00     | 0.00     | 0.00     | 0.00     | 0.00     | 0.00     | 0.00     | 0.00     | 0.00     | 0.00     | 0.00     | 0.00    | 0.00     | 0.00     | 0.00     | 0.00     |
| GT59       | 0.00     | 0.00     | 0.00     | 0.00     | 0.00     | 0.00     | 0.00     | 0.00     | 0.00     | 0.00     | 0.00     | 0.00     | 0.00    | 0.00     | 0.00     | 0.00     | 0.00     |
| GH34       | 0.00     | 0.00     | 0.00     | 0.00     | 0.00     | 0.00     | 0.00     | 0.00     | 0.00     | 0.00     | 0.00     | 0.00     | 0.00    | 0.00     | 0.00     | 0.00     | 0.00     |
| GT14       | 0.00     | 0.00     | 0.02     | 0.02     | 0.03     | 0.04     | 0.03     | 0.04     | 0.01     | 0.05     | 0.07     | 0.06     | 0.04    | 0.05     | 0.04     | 0.02     | 0.03     |
| GH47       | 0.00     | 0.01     | 0.01     | 0.00     | 0.00     | 0.01     | 0.00     | 0.00     | 0.00     | 0.00     | 0.00     | 0.00     | 0.00    | 0.00     | 0.00     | 0.00     | 0.00     |
| GH97       | 0.31     | 0.88     | 0.32     | 0.76     | 1.12     | 0.83     | 1.03     | 1.87     | 0.99     | 1.22     | 0.79     | 1.21     | 1.30    | 1.24     | 1.33     | 0.64     | 0.81     |
| GH50       | 0.02     | 0.06     | 0.00     | 0.03     | 0.06     | 0.06     | 0.04     | 0.11     | 0.01     | 0.13     | 0.01     | 0.06     | 0.06    | 0.09     | 0.11     | 0.01     | 0.08     |
| GT26       | 0.16     | 0.16     | 0.30     | 0.18     | 0.19     | 0.27     | 0.19     | 0.16     | 0.20     | 0.24     | 0.19     | 0.32     | 0.18    | 0.25     | 0.33     | 0.21     | 0.22     |
| GH18       | 0.67     | 0.51     | 0.59     | 0.65     | 0.80     | 0.77     | 0.51     | 1.18     | 0.41     | 0.89     | 0.85     | 0.96     | 0.70    | 0.79     | 0.75     | 0.58     | 0.61     |
| GH37       | 0.00     | 0.03     | 0.00     | 0.01     | 0.01     | 0.01     | 0.02     | 0.00     | 0.01     | 0.02     | 0.00     | 0.00     | 0.01    | 0.00     | 0.05     | 0.05     | 0.01     |
| PL13       | 0.01     | 0.05     | 0.01     | 0.03     | 0.06     | 0.05     | 0.03     | 0.11     | 0.07     | 0.06     | 0.03     | 0.05     | 0.07    | 0.08     | 0.09     | 0.02     | 0.03     |
| GH27       | 0.13     | 0.16     | 0.13     | 0.21     | 0.27     | 0.27     | 0.28     | 0.27     | 0.28     | 0.41     | 0.28     | 0.43     | 0.35    | 0.35     | 0.47     | 0.25     | 0.23     |
| GT54       | 0.00     | 0.00     | 0.00     | 0.00     | 0.00     | 0.00     | 0.00     | 0.00     | 0.00     | 0.00     | 0.00     | 0.00     | 0.00    | 0.00     | 0.00     | 0.00     | 0.00     |
| GT91       | 0.00     | 0.00     | 0.00     | 0.00     | 0.00     | 0.00     | 0.00     | 0.00     | 0.00     | 0.00     | 0.00     | 0.00     | 0.00    | 0.00     | 0.00     | 0.00     | 0.00     |
| GT72       | 0.00     | 0.00     | 0.00     | 0.00     | 0.00     | 0.00     | 0.00     | 0.00     | 0.00     | 0.00     | 0.00     | 0.00     | 0.00    | 0.00     | 0.00     | 0.00     | 0.00     |
| GH67       | 0.01     | 0.07     | 0.05     | 0.09     | 0.05     | 0.07     | 0.11     | 0.11     | 0.12     | 0.15     | 0.06     | 0.05     | 0.09    | 0.14     | 0.10     | 0.07     | 0.06     |
| GH12       | 0.00     | 0.00     | 0.00     | 0.00     | 0.00     | 0.00     | 0.00     | 0.00     | 0.00     | 0.01     | 0.00     | 0.00     | 0.00    | 0.00     | 0.00     | 0.00     | 0.00     |
| GH91       | 0.01     | 0.01     | 0.01     | 0.03     | 0.04     | 0.01     | 0.02     | 0.09     | 0.01     | 0.05     | 0.02     | 0.01     | 0.01    | 0.09     | 0.05     | 0.01     | 0.01     |
| GT69       | 0.00     | 0.00     | 0.00     | 0.00     | 0.00     | 0.00     | 0.00     | 0.00     | 0.00     | 0.00     | 0.00     | 0.00     | 0.00    | 0.00     | 0.00     | 0.00     | 0.00     |
| GH106      | 0.12     | 0.25     | 0.06     | 0.19     | 0.29     | 0.28     | 0.38     | 0.59     | 0.28     | 0.37     | 0.14     | 0.24     | 0.33    | 0.45     | 0.52     | 0.26     | 0.29     |
| GT62       | 0.00     | 0.00     | 0.00     | 0.00     | 0.00     | 0.00     | 0.00     | 0.00     | 0.00     | 0.00     | 0.00     | 0.00     | 0.00    | 0.00     | 0.00     | 0.00     | 0.00     |
| GH17       | 0.00     | 0.00     | 0.00     | 0.00     | 0.01     | 0.00     | 0.00     | 0.00     | 0.00     | 0.00     | 0.00     | 0.00     | 0.00    | 0.00     | 0.00     | 0.00     | 0.00     |
| GH88       | 0.22     | 0.41     | 0.17     | 0.37     | 0.45     | 0.33     | 0.47     | 0.63     | 0.41     | 0.46     | 0.23     | 0.46     | 0.41    | 0.62     | 0.65     | 0.29     | 0.37     |
| CE5        | 0.00     | 0.00     | 0.00     | 0.00     | 0.00     | 0.00     | 0.00     | 0.00     | 0.00     | 0.00     | 0.00     | 0.00     | 0.00    | 0.00     | 0.00     | 0.00     | 0.00     |
| GT8        | 0.06     | 0.09     | 0.12     | 0.06     | 0.07     | 0.16     | 0.09     | 0.04     | 0.17     | 0.16     | 0.17     | 0.29     | 0.12    | 0.07     | 0.18     | 0.13     | 0.10     |
| GT50       | 0.00     | 0.00     | 0.00     | 0.00     | 0.00     | 0.00     | 0.00     | 0.00     | 0.00     | 0.00     | 0.00     | 0.00     | 0.00    | 0.00     | 0.00     | 0.00     | 0.00     |
| GT20       | 0.05     | 0.10     | 0.02     | 0.10     | 0.11     | 0.06     | 0.11     | 0.20     | 0.12     | 0.10     | 0.02     | 0.03     | 0.08    | 0.15     | 0.12     | 0.10     | 0.12     |
| PL9        | 0.05     | 0.08     | 0.10     | 0.15     | 0.10     | 0.05     | 0.02     | 0.17     | 0.12     | 0.12     | 0.06     | 0.06     | 0.10    | 0.21     | 0.11     | 0.07     | 0.08     |
| GH55       | 0.04     | 0.03     | 0.01     | 0.02     | 0.05     | 0.04     | 0.02     | 0.01     | 0.01     | 0.08     | 0.06     | 0.08     | 0.02    | 0.05     | 0.01     | 0.05     | 0.02     |
| GH64       | 0.00     | 0.00     | 0.01     | 0.00     | 0.00     | 0.00     | 0.00     | 0.00     | 0.00     | 0.00     | 0.00     | 0.00     | 0.00    | 0.00     | 0.00     | 0.00     | 0.00     |
| GH127      | 0.27     | 0.27     | 0.29     | 0.19     | 0.39     | 0.38     | 0.42     | 0.47     | 0.19     | 0.41     | 0.39     | 0.47     | 0.39    | 0.47     | 0.49     | 0.41     | 0.33     |
| GH103      | 0.00     | 0.00     | 0.01     | 0.00     | 0.00     | 0.00     | 0.00     | 0.00     | 0.00     | 0.00     | 0.00     | 0.00     | 0.00    | 0.00     | 0.01     | 0.05     | 0.00     |
| GH3        | 2.11     | 2.34     | 2.72     | 2.79     | 3.54     | 3.39     | 2.78     | 3.50     | 2.73     | 3.80     | 3.48     | 4.75     | 2.91    | 4.40     | 4.16     | 2.74     | 3.02     |
| GT45       | 0.00     | 0.00     | 0.00     | 0.00     | 0.00     | 0.00     | 0.00     | 0.00     | 0.00     | 0.00     | 0.00     | 0.00     | 0.00    | 0.00     | 0.00     | 0.00     | 0.00     |
| GT74       | 0.00     | 0.00     | 0.00     | 0.00     | 0.00     | 0.00     | 0.00     | 0.00     | 0.00     | 0.00     | 0.00     | 0.00     | 0.00    | 0.00     | 0.00     | 0.00     | 0.00     |
| GT90       | 0.00     | 0.00     | 0.00     | 0.00     | 0.00     | 0.00     | 0.01     | 0.00     | 0.00     | 0.00     | 0.00     | 0.00     | 0.00    | 0.01     | 0.00     | 0.00     | 0.00     |
| GH116      | 0.04     | 0.04     | 0.02     | 0.09     | 0.08     | 0.02     | 0.07     | 0.06     | 0.12     | 0.06     | 0.14     | 0.15     | 0.07    | 0.12     | 0.09     | 0.04     | 0.06     |
| GH31       | 0.83     | 0.79     | 0.99     | 0.96     | 1.28     | 1.30     | 0.95     | 1.56     | 0.90     | 1.37     | 1.24     | 1.59     | 1.07    | 1.38     | 1.46     | 1.03     | 1.01     |
| GT12       | 0.00     | 0.00     | 0.00     | 0.00     | 0.00     | 0.00     | 0.00     | 0.00     | 0.00     | 0.00     | 0.00     | 0.00     | 0.00    | 0.00     | 0.00     | 0.00     | 0.00     |
| CE1        | 0.24     | 0.30     | 0.20     | 0.43     | 0.42     | 0.33     | 0.43     | 0.46     | 0.35     | 0.43     | 0.48     | 0.60     | 0.45    | 0.51     | 0.53     | 0.26     | 0.39     |
| GH121      | 0.00     | 0.00     | 0.01     | 0.00     | 0.01     | 0.00     | 0.00     | 0.00     | 0.00     | 0.00     | 0.05     | 0.10     | 0.00    | 0.00     | 0.02     | 0.00     | 0.00     |
| GH79       | 0.01     | 0.00     | 0.01     | 0.01     | 0.00     | 0.04     | 0.00     | 0.00     | 0.00     | 0.02     | 0.01     | 0.03     | 0.00    | 0.00     | 0.00     | 0.01     | 0.01     |
| GT73       | 0.00     | 0.00     | 0.00     | 0.00     | 0.00     | 0.00     | 0.00     | 0.00     | 0.00     | 0.00     | 0.00     | 0.00     | 0.00    | 0.00     | 0.00     | 0.01     | 0.00     |
| GH77       | 0.65     | 0.59     | 0.98     | 0.63     | 0.66     | 0.93     | 0.46     | 0.53     | 0.58     | 0.71     | 0.79     | 0.87     | 0.70    | 0.67     | 0.73     | 0.62     | 0.65     |
| PL17       | 0.01     | 0.01     | 0.00     | 0.01     | 0.01     | 0.00     | 0.00     | 0.00     | 0.00     | 0.01     | 0.00     | 0.00     | 0.01    | 0.01     | 0.01     | 0.01     | 0.00     |
| PL8        | 0.14     | 0.30     | 0.06     | 0.27     | 0.40     | 0.19     | 0.33     | 0.75     | 0.40     | 0.45     | 0.15     | 0.28     | 0.26    | 0.37     | 0.43     | 0.14     | 0.28     |

| CAZY_group | AM-AD-18 | AM-AD-19 | AM-AD-20 | AM-AD-21 | AM-AD-22 | AM-AD-23 | AM-AD-24 | AM-AD-25 | AM-AD-26 | AM-AD-27 | AM-AD-28 | AM-AD-29 | AM-AD-3 | AM-AD-30 | AM-AD-31 | AM-AD-32 | AM-AD-33 |
|------------|----------|----------|----------|----------|----------|----------|----------|----------|----------|----------|----------|----------|---------|----------|----------|----------|----------|
| CE9        | 0.41     | 0.42     | 0.45     | 0.36     | 0.42     | 0.54     | 0.25     | 0.53     | 0.28     | 0.41     | 0.43     | 0.50     | 0.39    | 0.56     | 0.43     | 0.33     | 0.25     |
| CE15       | 0.03     | 0.03     | 0.01     | 0.01     | 0.01     | 0.03     | 0.01     | 0.01     | 0.02     | 0.02     | 0.00     | 0.04     | 0.02    | 0.01     | 0.02     | 0.00     | 0.03     |
| GT79       | 0.00     | 0.00     | 0.00     | 0.00     | 0.00     | 0.00     | 0.00     | 0.00     | 0.00     | 0.00     | 0.00     | 0.00     | 0.00    | 0.00     | 0.00     | 0.00     | 0.00     |
| GT10       | 0.00     | 0.01     | 0.00     | 0.00     | 0.01     | 0.00     | 0.03     | 0.00     | 0.01     | 0.02     | 0.01     | 0.01     | 0.00    | 0.00     | 0.01     | 0.02     | 0.01     |
| GH119      | 0.00     | 0.00     | 0.00     | 0.00     | 0.00     | 0.00     | 0.00     | 0.00     | 0.00     | 0.00     | 0.00     | 0.00     | 0.00    | 0.00     | 0.00     | 0.00     | 0.00     |
| GH16       | 0.09     | 0.18     | 0.15     | 0.15     | 0.30     | 0.22     | 0.23     | 0.43     | 0.16     | 0.32     | 0.15     | 0.25     | 0.28    | 0.32     | 0.34     | 0.26     | 0.14     |
| GH43       | 1.04     | 1.93     | 1.36     | 1.68     | 2.53     | 2.24     | 2.35     | 3.69     | 1.50     | 2.96     | 2.63     | 3.64     | 2.83    | 3.72     | 3.22     | 2.06     | 2.14     |
| GH51       | 0.42     | 0.48     | 0.46     | 0.46     | 0.67     | 0.76     | 0.55     | 0.72     | 0.27     | 0.61     | 0.63     | 0.89     | 0.65    | 0.94     | 0.91     | 0.73     | 0.55     |
| GT35       | 1.11     | 0.80     | 1.67     | 1.08     | 1.05     | 1.36     | 0.62     | 0.62     | 0.64     | 1.10     | 1.21     | 1.29     | 1.15    | 1.19     | 1.26     | 1.23     | 0.96     |
| GT25       | 0.00     | 0.00     | 0.03     | 0.01     | 0.00     | 0.01     | 0.00     | 0.01     | 0.00     | 0.00     | 0.02     | 0.04     | 0.00    | 0.00     | 0.00     | 0.02     | 0.00     |
| GT2        | 3.93     | 4.34     | 4.70     | 4.79     | 5.25     | 5.76     | 4.58     | 4.48     | 5.07     | 5.61     | 5.48     | 6.38     | 5.47    | 5.40     | 6.01     | 4.98     | 4.94     |
| GT51       | 0.70     | 1.01     | 1.00     | 0.97     | 1.08     | 1.13     | 1.11     | 1.09     | 1.21     | 1.17     | 0.96     | 1.39     | 1.01    | 1.21     | 1.23     | 1.13     | 1.08     |
| GH107      | 0.00     | 0.00     | 0.00     | 0.00     | 0.00     | 0.00     | 0.00     | 0.00     | 0.00     | 0.00     | 0.00     | 0.00     | 0.00    | 0.00     | 0.00     | 0.00     | 0.00     |
| GH7        | 0.00     | 0.00     | 0.00     | 0.00     | 0.00     | 0.00     | 0.00     | 0.00     | 0.00     | 0.00     | 0.00     | 0.00     | 0.00    | 0.00     | 0.00     | 0.00     | 0.00     |
| GT7        | 0.00     | 0.00     | 0.00     | 0.00     | 0.00     | 0.00     | 0.00     | 0.00     | 0.00     | 0.00     | 0.00     | 0.00     | 0.00    | 0.00     | 0.00     | 0.00     | 0.00     |
| GT36       | 0.00     | 0.00     | 0.00     | 0.00     | 0.00     | 0.00     | 0.00     | 0.00     | 0.00     | 0.00     | 0.00     | 0.00     | 0.00    | 0.00     | 0.00     | 0.00     | 0.00     |
| PL7        | 0.00     | 0.00     | 0.01     | 0.00     | 0.00     | 0.00     | 0.00     | 0.00     | 0.00     | 0.00     | 0.00     | 0.00     | 0.00    | 0.00     | 0.00     | 0.01     | 0.00     |
| GH110      | 0.05     | 0.12     | 0.03     | 0.13     | 0.11     | 0.12     | 0.11     | 0.23     | 0.09     | 0.15     | 0.16     | 0.18     | 0.16    | 0.18     | 0.13     | 0.13     | 0.07     |
| GT21       | 0.00     | 0.00     | 0.00     | 0.00     | 0.00     | 0.00     | 0.00     | 0.00     | 0.00     | 0.00     | 0.00     | 0.00     | 0.00    | 0.00     | 0.00     | 0.00     | 0.00     |
| GH62       | 0.00     | 0.00     | 0.00     | 0.00     | 0.00     | 0.00     | 0.00     | 0.00     | 0.00     | 0.00     | 0.00     | 0.00     | 0.00    | 0.00     | 0.00     | 0.00     | 0.00     |
| GH125      | 0.10     | 0.18     | 0.07     | 0.19     | 0.27     | 0.16     | 0.20     | 0.32     | 0.19     | 0.25     | 0.26     | 0.41     | 0.18    | 0.29     | 0.27     | 0.10     | 0.28     |
| GH117      | 0.03     | 0.04     | 0.01     | 0.08     | 0.07     | 0.10     | 0.13     | 0.19     | 0.12     | 0.14     | 0.05     | 0.13     | 0.07    | 0.17     | 0.15     | 0.10     | 0.13     |
| GH68       | 0.00     | 0.01     | 0.00     | 0.00     | 0.00     | 0.00     | 0.00     | 0.00     | 0.00     | 0.00     | 0.00     | 0.00     | 0.00    | 0.00     | 0.00     | 0.00     | 0.00     |
| GH85       | 0.01     | 0.01     | 0.02     | 0.00     | 0.03     | 0.02     | 0.02     | 0.02     | 0.00     | 0.02     | 0.07     | 0.04     | 0.06    | 0.03     | 0.02     | 0.00     | 0.01     |
| GH92       | 0.80     | 1.67     | 0.46     | 1.66     | 2.12     | 1.50     | 2.32     | 3.82     | 1.80     | 2.34     | 1.76     | 2.68     | 2.20    | 2.66     | 2.50     | 1.38     | 2.00     |
| GH40       | 0.00     | 0.00     | 0.00     | 0.00     | 0.00     | 0.00     | 0.00     | 0.00     | 0.00     | 0.00     | 0.00     | 0.00     | 0.00    | 0.00     | 0.00     | 0.00     | 0.00     |
| GT49       | 0.00     | 0.00     | 0.00     | 0.00     | 0.00     | 0.00     | 0.00     | 0.00     | 0.00     | 0.00     | 0.00     | 0.00     | 0.00    | 0.00     | 0.00     | 0.00     | 0.00     |
| GH112      | 0.29     | 0.13     | 0.24     | 0.15     | 0.19     | 0.30     | 0.05     | 0.09     | 0.07     | 0.25     | 0.22     | 0.40     | 0.12    | 0.15     | 0.20     | 0.32     | 0.12     |
| GT67       | 0.00     | 0.00     | 0.00     | 0.00     | 0.00     | 0.00     | 0.00     | 0.00     | 0.00     | 0.00     | 0.00     | 0.00     | 0.00    | 0.00     | 0.00     | 0.00     | 0.00     |
| CE8        | 0.06     | 0.28     | 0.20     | 0.22     | 0.24     | 0.32     | 0.25     | 0.24     | 0.26     | 0.32     | 0.12     | 0.15     | 0.25    | 0.38     | 0.26     | 0.23     | 0.19     |
| GT86       | 0.00     | 0.00     | 0.00     | 0.00     | 0.00     | 0.00     | 0.00     | 0.00     | 0.00     | 0.00     | 0.00     | 0.00     | 0.00    | 0.00     | 0.00     | 0.00     | 0.00     |
| GH101      | 0.01     | 0.00     | 0.06     | 0.00     | 0.01     | 0.03     | 0.00     | 0.00     | 0.00     | 0.00     | 0.02     | 0.14     | 0.00    | 0.00     | 0.01     | 0.00     | 0.00     |
| GH81       | 0.01     | 0.00     | 0.01     | 0.00     | 0.02     | 0.01     | 0.00     | 0.00     | 0.00     | 0.01     | 0.01     | 0.03     | 0.00    | 0.00     | 0.00     | 0.01     | 0.00     |
| GT93       | 0.00     | 0.00     | 0.00     | 0.00     | 0.00     | 0.00     | 0.00     | 0.00     | 0.00     | 0.00     | 0.00     | 0.00     | 0.00    | 0.00     | 0.00     | 0.00     | 0.00     |
| GT63       | 0.00     | 0.00     | 0.00     | 0.00     | 0.00     | 0.00     | 0.00     | 0.00     | 0.00     | 0.00     | 0.00     | 0.00     | 0.00    | 0.00     | 0.00     | 0.00     | 0.00     |
| CE11       | 0.16     | 0.26     | 0.17     | 0.20     | 0.24     | 0.27     | 0.34     | 0.23     | 0.36     | 0.24     | 0.27     | 0.38     | 0.26    | 0.26     | 0.30     | 0.28     | 0.24     |
| GT19       | 0.06     | 0.13     | 0.07     | 0.10     | 0.13     | 0.13     | 0.23     | 0.24     | 0.17     | 0.15     | 0.12     | 0.15     | 0.18    | 0.17     | 0.17     | 0.12     | 0.15     |
| GT33       | 0.00     | 0.00     | 0.00     | 0.00     | 0.00     | 0.00     | 0.00     | 0.00     | 0.00     | 0.00     | 0.00     | 0.00     | 0.00    | 0.00     | 0.00     | 0.00     | 0.00     |
| GH21       | 0.00     | 0.00     | 0.00     | 0.00     | 0.00     | 0.00     | 0.00     | 0.00     | 0.00     | 0.00     | 0.00     | 0.00     | 0.00    | 0.00     | 0.00     | 0.00     | 0.00     |
| GT68       | 0.00     | 0.00     | 0.00     | 0.00     | 0.00     | 0.00     | 0.00     | 0.00     | 0.00     | 0.00     | 0.00     | 0.00     | 0.00    | 0.00     | 0.00     | 0.00     | 0.00     |
| GH89       | 0.16     | 0.22     | 0.09     | 0.20     | 0.23     | 0.30     | 0.33     | 0.46     | 0.28     | 0.25     | 0.20     | 0.23     | 0.23    | 0.43     | 0.35     | 0.20     | 0.15     |
| GT82       | 0.00     | 0.00     | 0.00     | 0.00     | 0.00     | 0.00     | 0.00     | 0.00     | 0.00     | 0.00     | 0.00     | 0.00     | 0.00    | 0.00     | 0.00     | 0.00     | 0.00     |
| GH30       | 0.16     | 0.26     | 0.17     | 0.19     | 0.35     | 0.23     | 0.23     | 0.33     | 0.20     | 0.29     | 0.35     | 0.46     | 0.23    | 0.31     | 0.37     | 0.19     | 0.18     |
| GH20       | 0.84     | 1.28     | 0.44     | 0.99     | 1.20     | 1.31     | 1.55     | 2.77     | 1.30     | 1.87     | 1.16     | 1.64     | 1.51    | 2.06     | 1.86     | 0.94     | 1.48     |
| GH52       | 0.00     | 0.00     | 0.00     | 0.00     | 0.00     | 0.00     | 0.00     | 0.00     | 0.00     | 0.00     | 0.00     | 0.00     | 0.00    | 0.00     | 0.00     | 0.00     | 0.00     |
| GT84       | 0.02     | 0.00     | 0.01     | 0.03     | 0.04     | 0.04     | 0.00     | 0.00     | 0.02     | 0.00     | 0.01     | 0.03     | 0.08    | 0.00     | 0.02     | 0.00     | 0.02     |
| GT15       | 0.00     | 0.00     | 0.00     | 0.00     | 0.00     | 0.00     | 0.00     | 0.00     | 0.00     | 0.00     | 0.00     | 0.00     | 0.00    | 0.00     | 0.00     | 0.00     | 0.00     |
| GH93       | 0.00     | 0.00     | 0.00     | 0.00     | 0.01     | 0.02     | 0.01     | 0.00     | 0.00     | 0.01     | 0.02     | 0.00     | 0.01    | 0.02     | 0.01     | 0.00     | 0.00     |
| PL16       | 0.00     | 0.00     | 0.00     | 0.00     | 0.00     | 0.00     | 0.00     | 0.00     | 0.00     | 0.00     | 0.00     | 0.00     | 0.00    | 0.00     | 0.00     | 0.00     | 0.00     |
| GH26       | 0.08     | 0.08     | 0.12     | 0.13     | 0.15     | 0.18     | 0.12     | 0.03     | 0.05     | 0.23     | 0.20     | 0.23     | 0.21    | 0.14     | 0.22     | 0.27     | 0.12     |



| CAZY_group | AM-AD-18 | AM-AD-19 | AM-AD-20 | AM-AD-21 | AM-AD-22 | AM-AD-23 | AM-AD-24 | AM-AD-25 | AM-AD-26 | AM-AD-27 | AM-AD-28 | AM-AD-29 | AM-AD-3 | AM-AD-30 | AM-AD-31 | AM-AD-32 | AM-AD-33 |
|------------|----------|----------|----------|----------|----------|----------|----------|----------|----------|----------|----------|----------|---------|----------|----------|----------|----------|
| GT52       | 0.00     | 0.00     | 0.00     | 0.00     | 0.00     | 0.00     | 0.00     | 0.00     | 0.00     | 0.00     | 0.00     | 0.00     | 0.00    | 0.00     | 0.00     | 0.00     | 0.00     |
| GT64       | 0.00     | 0.00     | 0.00     | 0.00     | 0.00     | 0.00     | 0.00     | 0.00     | 0.00     | 0.00     | 0.00     | 0.00     | 0.00    | 0.00     | 0.00     | 0.00     | 0.00     |
| GT85       | 0.00     | 0.00     | 0.00     | 0.00     | 0.00     | 0.00     | 0.00     | 0.00     | 0.00     | 0.00     | 0.00     | 0.00     | 0.00    | 0.00     | 0.00     | 0.00     | 0.00     |
| GT16       | 0.00     | 0.00     | 0.00     | 0.00     | 0.00     | 0.00     | 0.00     | 0.00     | 0.00     | 0.00     | 0.00     | 0.00     | 0.00    | 0.00     | 0.00     | 0.00     | 0.00     |
| GH56       | 0.00     | 0.00     | 0.00     | 0.00     | 0.00     | 0.00     | 0.00     | 0.00     | 0.00     | 0.00     | 0.00     | 0.00     | 0.00    | 0.00     | 0.00     | 0.00     | 0.00     |
| GT60       | 0.00     | 0.00     | 0.00     | 0.00     | 0.00     | 0.00     | 0.00     | 0.00     | 0.00     | 0.00     | 0.00     | 0.00     | 0.00    | 0.00     | 0.00     | 0.00     | 0.00     |
| GH41       | 0.00     | 0.00     | 0.00     | 0.00     | 0.00     | 0.00     | 0.00     | 0.00     | 0.00     | 0.00     | 0.00     | 0.00     | 0.00    | 0.00     | 0.00     | 0.00     | 0.00     |
| CE7        | 0.09     | 0.17     | 0.05     | 0.07     | 0.14     | 0.08     | 0.10     | 0.16     | 0.07     | 0.10     | 0.05     | 0.11     | 0.09    | 0.24     | 0.21     | 0.08     | 0.13     |
| GH39       | 0.04     | 0.05     | 0.03     | 0.06     | 0.02     | 0.06     | 0.03     | 0.06     | 0.01     | 0.05     | 0.09     | 0.09     | 0.02    | 0.10     | 0.04     | 0.08     | 0.06     |
| GT30       | 0.16     | 0.21     | 0.17     | 0.23     | 0.29     | 0.25     | 0.41     | 0.42     | 0.42     | 0.31     | 0.28     | 0.28     | 0.29    | 0.26     | 0.30     | 0.27     | 0.30     |
| PL15       | 0.06     | 0.19     | 0.03     | 0.08     | 0.17     | 0.11     | 0.13     | 0.32     | 0.06     | 0.15     | 0.08     | 0.13     | 0.15    | 0.21     | 0.17     | 0.10     | 0.11     |
| GH102      | 0.01     | 0.01     | 0.03     | 0.01     | 0.01     | 0.04     | 0.01     | 0.00     | 0.01     | 0.01     | 0.01     | 0.01     | 0.00    | 0.00     | 0.00     | 0.01     | 0.00     |



| CAZY_group | AM-AD-34 | AM-AD-35 | AM-AD-37 | AM-AD-38 | AM-AD-39 | AM-AD-4 | AM-AD-40 | AM-AD-41 | AM-AD-42 | AM-AD-43 | AM-AD-44 | AM-AD-45 | AM-AD-46 | AM-AD-47 | AM-AD-48 | AM-AD-49 | AM-AD-5 |
|------------|----------|----------|----------|----------|----------|---------|----------|----------|----------|----------|----------|----------|----------|----------|----------|----------|---------|
| GH29       | 0.87     | 0.93     | 0.64     | 1.00     | 0.87     | 0.73    | 0.78     | 0.64     | 0.95     | 0.79     | 0.81     | 0.72     | 0.85     | 1.12     | 0.89     | 0.66     | 0.90    |
| PL4        | 0.00     | 0.00     | 0.00     | 0.02     | 0.00     | 0.00    | 0.00     | 0.00     | 0.00     | 0.00     | 0.00     | 0.00     | 0.00     | 0.00     | 0.01     | 0.00     | 0.00    |
| GH23       | 1.27     | 1.19     | 1.14     | 1.54     | 1.85     | 1.39    | 1.54     | 1.04     | 1.46     | 1.33     | 1.52     | 1.13     | 1.34     | 1.61     | 1.27     | 1.22     | 1.35    |
| CE6        | 0.06     | 0.03     | 0.05     | 0.01     | 0.04     | 0.02    | 0.01     | 0.01     | 0.00     | 0.05     | 0.02     | 0.05     | 0.07     | 0.07     | 0.07     | 0.03     | 0.08    |
| GH72       | 0.16     | 0.18     | 0.15     | 0.27     | 0.19     | 0.12    | 0.16     | 0.13     | 0.24     | 0.17     | 0.11     | 0.20     | 0.14     | 0.19     | 0.14     | 0.15     | 0.15    |
| GH114      | 0.00     | 0.00     | 0.00     | 0.00     | 0.00     | 0.00    | 0.00     | 0.00     | 0.00     | 0.00     | 0.00     | 0.00     | 0.00     | 0.00     | 0.00     | 0.00     | 0.00    |
| GH78       | 0.98     | 1.31     | 0.78     | 0.96     | 1.50     | 1.10    | 0.88     | 0.96     | 0.86     | 0.86     | 0.86     | 0.90     | 1.03     | 1.23     | 1.28     | 0.77     | 0.92    |
| PL19       | 0.00     | 0.00     | 0.00     | 0.00     | 0.00     | 0.00    | 0.00     | 0.00     | 0.00     | 0.00     | 0.00     | 0.00     | 0.00     | 0.00     | 0.00     | 0.00     | 0.00    |
| GT27       | 0.00     | 0.00     | 0.00     | 0.00     | 0.00     | 0.00    | 0.00     | 0.00     | 0.00     | 0.00     | 0.00     | 0.00     | 0.00     | 0.00     | 0.00     | 0.00     | 0.00    |
| GH5        | 0.31     | 0.40     | 0.33     | 0.56     | 0.56     | 0.42    | 0.40     | 0.70     | 0.46     | 0.60     | 0.21     | 0.42     | 0.57     | 0.59     | 0.63     | 0.45     | 0.72    |
| GT40       | 0.00     | 0.00     | 0.00     | 0.00     | 0.00     | 0.00    | 0.00     | 0.00     | 0.00     | 0.00     | 0.00     | 0.00     | 0.00     | 0.00     | 0.00     | 0.00     | 0.00    |
| CE13       | 0.00     | 0.00     | 0.00     | 0.01     | 0.00     | 0.00    | 0.00     | 0.00     | 0.00     | 0.00     | 0.00     | 0.00     | 0.00     | 0.00     | 0.01     | 0.00     | 0.00    |
| GT37       | 0.00     | 0.00     | 0.00     | 0.00     | 0.00     | 0.00    | 0.00     | 0.00     | 0.00     | 0.00     | 0.00     | 0.00     | 0.00     | 0.00     | 0.00     | 0.00     | 0.00    |
| GH33       | 0.33     | 0.28     | 0.23     | 0.26     | 0.43     | 0.34    | 0.30     | 0.18     | 0.24     | 0.22     | 0.33     | 0.19     | 0.20     | 0.39     | 0.24     | 0.16     | 0.37    |
| GT65       | 0.00     | 0.00     | 0.00     | 0.00     | 0.00     | 0.00    | 0.00     | 0.00     | 0.00     | 0.00     | 0.00     | 0.00     | 0.00     | 0.00     | 0.00     | 0.00     | 0.00    |
| GH86       | 0.00     | 0.00     | 0.01     | 0.01     | 0.02     | 0.01    | 0.00     | 0.00     | 0.00     | 0.00     | 0.00     | 0.00     | 0.01     | 0.00     | 0.00     | 0.01     | 0.00    |
| GH123      | 0.10     | 0.18     | 0.17     | 0.11     | 0.21     | 0.10    | 0.17     | 0.14     | 0.19     | 0.15     | 0.12     | 0.16     | 0.12     | 0.18     | 0.11     | 0.07     | 0.17    |
| GH96       | 0.00     | 0.00     | 0.00     | 0.00     | 0.00     | 0.00    | 0.00     | 0.00     | 0.00     | 0.00     | 0.00     | 0.00     | 0.00     | 0.00     | 0.00     | 0.00     | 0.00    |
| GH14       | 0.00     | 0.00     | 0.00     | 0.00     | 0.00     | 0.01    | 0.00     | 0.00     | 0.00     | 0.00     | 0.00     | 0.00     | 0.00     | 0.00     | 0.00     | 0.00     | 0.00    |
| CE3        | 0.00     | 0.00     | 0.00     | 0.00     | 0.00     | 0.00    | 0.00     | 0.00     | 0.00     | 0.00     | 0.00     | 0.00     | 0.00     | 0.00     | 0.00     | 0.00     | 0.00    |
| PL10       | 0.05     | 0.15     | 0.02     | 0.12     | 0.10     | 0.08    | 0.19     | 0.09     | 0.10     | 0.06     | 0.11     | 0.10     | 0.06     | 0.13     | 0.12     | 0.04     | 0.14    |
| GT48       | 0.00     | 0.00     | 0.00     | 0.00     | 0.00     | 0.00    | 0.00     | 0.00     | 0.00     | 0.00     | 0.00     | 0.00     | 0.00     | 0.00     | 0.00     | 0.00     | 0.00    |
| PL6        | 0.00     | 0.01     | 0.02     | 0.00     | 0.00     | 0.00    | 0.00     | 0.00     | 0.00     | 0.00     | 0.00     | 0.00     | 0.01     | 0.00     | 0.01     | 0.00     | 0.02    |
| GT83       | 0.17     | 0.09     | 0.05     | 0.13     | 0.19     | 0.16    | 0.14     | 0.07     | 0.10     | 0.10     | 0.12     | 0.25     | 0.13     | 0.12     | 0.13     | 0.06     | 0.17    |
| GH126      | 0.00     | 0.00     | 0.00     | 0.00     | 0.00     | 0.00    | 0.00     | 0.00     | 0.00     | 0.00     | 0.00     | 0.00     | 0.00     | 0.00     | 0.00     | 0.00     | 0.00    |
| GH9        | 0.12     | 0.18     | 0.10     | 0.16     | 0.35     | 0.32    | 0.09     | 0.09     | 0.24     | 0.21     | 0.09     | 0.09     | 0.12     | 0.17     | 0.24     | 0.20     | 0.12    |
| GH75       | 0.00     | 0.00     | 0.00     | 0.00     | 0.00     | 0.00    | 0.00     | 0.00     | 0.00     | 0.00     | 0.00     | 0.00     | 0.00     | 0.00     | 0.00     | 0.00     | 0.00    |
| GT71       | 0.00     | 0.00     | 0.00     | 0.00     | 0.00     | 0.00    | 0.00     | 0.00     | 0.00     | 0.00     | 0.00     | 0.00     | 0.00     | 0.00     | 0.00     | 0.00     | 0.00    |
| GH46       | 0.00     | 0.00     | 0.00     | 0.01     | 0.00     | 0.00    | 0.00     | 0.00     | 0.00     | 0.00     | 0.00     | 0.00     | 0.00     | 0.00     | 0.00     | 0.00     | 0.00    |
| GT61       | 0.00     | 0.00     | 0.00     | 0.00     | 0.00     | 0.00    | 0.00     | 0.00     | 0.00     | 0.00     | 0.00     | 0.00     | 0.00     | 0.00     | 0.00     | 0.00     | 0.00    |
| GT3        | 0.19     | 0.38     | 0.21     | 0.40     | 0.31     | 0.38    | 0.52     | 0.22     | 0.49     | 0.30     | 0.20     | 0.29     | 0.28     | 0.38     | 0.30     | 0.17     | 0.42    |
| PL3        | 0.00     | 0.00     | 0.00     | 0.00     | 0.00     | 0.00    | 0.00     | 0.00     | 0.00     | 0.00     | 0.00     | 0.00     | 0.00     | 0.00     | 0.00     | 0.00     | 0.00    |
| GH108      | 0.03     | 0.06     | 0.03     | 0.03     | 0.04     | 0.04    | 0.01     | 0.05     | 0.03     | 0.03     | 0.02     | 0.00     | 0.02     | 0.04     | 0.02     | 0.04     | 0.03    |
| GT56       | 0.00     | 0.00     | 0.00     | 0.00     | 0.00     | 0.00    | 0.00     | 0.00     | 0.00     | 0.00     | 0.01     | 0.00     | 0.00     | 0.00     | 0.00     | 0.00     | 0.00    |
| PL11       | 0.17     | 0.24     | 0.17     | 0.24     | 0.17     | 0.10    | 0.19     | 0.14     | 0.10     | 0.10     | 0.09     | 0.14     | 0.13     | 0.29     | 0.15     | 0.11     | 0.16    |
| GH45       | 0.00     | 0.00     | 0.01     | 0.01     | 0.00     | 0.00    | 0.00     | 0.00     | 0.00     | 0.00     | 0.00     | 0.00     | 0.00     | 0.01     | 0.00     | 0.00     | 0.01    |
| GT34       | 0.00     | 0.00     | 0.00     | 0.00     | 0.00     | 0.00    | 0.00     | 0.00     | 0.00     | 0.00     | 0.00     | 0.00     | 0.00     | 0.00     | 0.00     | 0.00     | 0.00    |
| PL14       | 0.00     | 0.00     | 0.00     | 0.00     | 0.00     | 0.00    | 0.00     | 0.00     | 0.00     | 0.00     | 0.00     | 0.00     | 0.00     | 0.00     | 0.00     | 0.00     | 0.00    |
| GH19       | 0.01     | 0.00     | 0.01     | 0.02     | 0.02     | 0.01    | 0.03     | 0.01     | 0.00     | 0.01     | 0.01     | 0.00     | 0.00     | 0.01     | 0.00     | 0.02     | 0.01    |
| GH118      | 0.00     | 0.00     | 0.00     | 0.00     | 0.00     | 0.00    | 0.00     | 0.00     | 0.00     | 0.00     | 0.00     | 0.00     | 0.00     | 0.00     | 0.00     | 0.00     | 0.00    |
| GH82       | 0.00     | 0.00     | 0.00     | 0.00     | 0.00     | 0.00    | 0.00     | 0.00     | 0.00     | 0.00     | 0.00     | 0.00     | 0.00     | 0.00     | 0.00     | 0.00     | 0.00    |
| GH76       | 0.17     | 0.23     | 0.30     | 0.19     | 0.60     | 0.22    | 0.17     | 0.23     | 0.15     | 0.25     | 0.15     | 0.23     | 0.22     | 0.36     | 0.24     | 0.11     | 0.20    |
| GT4        | 2.28     | 2.12     | 2.22     | 2.44     | 3.40     | 1.95    | 2.77     | 2.16     | 2.31     | 2.09     | 1.76     | 2.63     | 2.21     | 3.11     | 2.90     | 1.61     | 2.77    |
| GT87       | 0.01     | 0.00     | 0.01     | 0.01     | 0.00     | 0.01    | 0.00     | 0.01     | 0.00     | 0.01     | 0.01     | 0.00     | 0.02     | 0.00     | 0.00     | 0.01     | 0.00    |
| GH24       | 0.13     | 0.11     | 0.14     | 0.13     | 0.19     | 0.12    | 0.13     | 0.10     | 0.12     | 0.10     | 0.18     | 0.10     | 0.20     | 0.16     | 0.12     | 0.08     | 0.12    |
| GH90       | 0.00     | 0.00     | 0.00     | 0.00     | 0.00     | 0.00    | 0.00     | 0.00     | 0.00     | 0.00     | 0.00     | 0.00     | 0.00     | 0.00     | 0.00     | 0.00     | 0.00    |
| GH57       | 0.13     | 0.26     | 0.12     | 0.24     | 0.23     | 0.21    | 0.16     | 0.15     | 0.27     | 0.17     | 0.11     | 0.14     | 0.24     | 0.18     | 0.26     | 0.10     | 0.22    |
| GH36       | 0.90     | 0.78     | 0.72     | 1.19     | 1.05     | 0.83    | 1.05     | 0.97     | 0.77     | 0.73     | 0.59     | 0.88     | 1.00     | 1.02     | 1.09     | 0.64     | 0.78    |
| GT46       | 0.00     | 0.00     | 0.00     | 0.00     | 0.00     | 0.00    | 0.00     | 0.00     | 0.00     | 0.00     | 0.00     | 0.00     | 0.00     | 0.00     | 0.00     | 0.00     | 0.00    |
| GH66       | 0.05     | 0.05     | 0.04     | 0.07     | 0.04     | 0.02    | 0.00     | 0.03     | 0.03     | 0.05     | 0.04     | 0.01     | 0.04     | 0.03     | 0.05     | 0.03     | 0.03    |



| CAZY_group | AM-AD-34 | AM-AD-35 | AM-AD-37 | AM-AD-38 | AM-AD-39 | AM-AD-4 | AM-AD-40 | AM-AD-41 | AM-AD-42 | AM-AD-43 | AM-AD-44 | AM-AD-45 | AM-AD-46 | AM-AD-47 | AM-AD-48 | AM-AD-49 | AM-AD-5 |
|------------|----------|----------|----------|----------|----------|---------|----------|----------|----------|----------|----------|----------|----------|----------|----------|----------|---------|
| GT76       | 0.00     | 0.00     | 0.00     | 0.00     | 0.00     | 0.00    | 0.00     | 0.00     | 0.00     | 0.00     | 0.00     | 0.00     | 0.00     | 0.00     | 0.00     | 0.00     | 0.00    |
| GT32       | 0.10     | 0.09     | 0.12     | 0.10     | 0.19     | 0.10    | 0.13     | 0.09     | 0.07     | 0.08     | 0.05     | 0.10     | 0.16     | 0.12     | 0.13     | 0.10     | 0.10    |
| GT47       | 0.08     | 0.10     | 0.11     | 0.09     | 0.10     | 0.10    | 0.09     | 0.05     | 0.09     | 0.06     | 0.08     | 0.05     | 0.09     | 0.11     | 0.11     | 0.07     | 0.05    |
| GH84       | 0.16     | 0.16     | 0.11     | 0.08     | 0.16     | 0.10    | 0.17     | 0.09     | 0.21     | 0.13     | 0.07     | 0.10     | 0.12     | 0.11     | 0.13     | 0.08     | 0.09    |
| GH83       | 0.00     | 0.00     | 0.00     | 0.00     | 0.00     | 0.00    | 0.00     | 0.00     | 0.00     | 0.00     | 0.00     | 0.00     | 0.00     | 0.00     | 0.00     | 0.00     | 0.00    |
| GT59       | 0.00     | 0.00     | 0.00     | 0.00     | 0.00     | 0.00    | 0.00     | 0.00     | 0.00     | 0.00     | 0.00     | 0.00     | 0.00     | 0.00     | 0.00     | 0.00     | 0.00    |
| GH34       | 0.00     | 0.00     | 0.00     | 0.00     | 0.00     | 0.00    | 0.00     | 0.00     | 0.00     | 0.00     | 0.00     | 0.00     | 0.00     | 0.00     | 0.00     | 0.00     | 0.00    |
| GT14       | 0.02     | 0.03     | 0.04     | 0.02     | 0.12     | 0.04    | 0.01     | 0.02     | 0.07     | 0.01     | 0.01     | 0.03     | 0.00     | 0.06     | 0.03     | 0.03     | 0.08    |
| GH47       | 0.00     | 0.00     | 0.00     | 0.00     | 0.00     | 0.00    | 0.00     | 0.00     | 0.00     | 0.00     | 0.00     | 0.00     | 0.00     | 0.00     | 0.00     | 0.00     | 0.00    |
| GH97       | 0.98     | 1.40     | 0.78     | 1.26     | 1.79     | 0.75    | 1.12     | 0.74     | 0.96     | 0.85     | 0.68     | 1.04     | 1.08     | 1.15     | 1.31     | 0.57     | 1.19    |
| GH50       | 0.08     | 0.06     | 0.04     | 0.03     | 0.02     | 0.12    | 0.00     | 0.09     | 0.00     | 0.07     | 0.07     | 0.06     | 0.10     | 0.10     | 0.07     | 0.06     | 0.09    |
| GT26       | 0.23     | 0.22     | 0.22     | 0.27     | 0.27     | 0.16    | 0.24     | 0.13     | 0.24     | 0.21     | 0.21     | 0.20     | 0.23     | 0.27     | 0.24     | 0.18     | 0.18    |
| GH18       | 0.63     | 0.87     | 0.71     | 0.87     | 1.22     | 0.70    | 0.56     | 0.63     | 0.55     | 0.73     | 0.57     | 0.59     | 0.75     | 0.83     | 0.72     | 0.51     | 0.85    |
| GH37       | 0.00     | 0.03     | 0.01     | 0.03     | 0.04     | 0.02    | 0.00     | 0.02     | 0.00     | 0.00     | 0.03     | 0.00     | 0.00     | 0.00     | 0.01     | 0.00     | 0.00    |
| PL13       | 0.04     | 0.08     | 0.04     | 0.07     | 0.14     | 0.04    | 0.06     | 0.03     | 0.04     | 0.03     | 0.02     | 0.08     | 0.02     | 0.08     | 0.06     | 0.02     | 0.09    |
| GH27       | 0.27     | 0.29     | 0.27     | 0.41     | 0.43     | 0.28    | 0.46     | 0.24     | 0.27     | 0.33     | 0.23     | 0.27     | 0.19     | 0.40     | 0.35     | 0.18     | 0.24    |
| GT54       | 0.00     | 0.00     | 0.00     | 0.00     | 0.00     | 0.00    | 0.00     | 0.00     | 0.00     | 0.00     | 0.00     | 0.00     | 0.00     | 0.00     | 0.00     | 0.00     | 0.00    |
| GT91       | 0.00     | 0.00     | 0.00     | 0.00     | 0.00     | 0.00    | 0.00     | 0.00     | 0.00     | 0.00     | 0.00     | 0.00     | 0.00     | 0.00     | 0.00     | 0.00     | 0.00    |
| GT72       | 0.00     | 0.00     | 0.00     | 0.00     | 0.00     | 0.00    | 0.00     | 0.00     | 0.00     | 0.00     | 0.00     | 0.00     | 0.00     | 0.00     | 0.00     | 0.00     | 0.00    |
| GH67       | 0.08     | 0.12     | 0.11     | 0.06     | 0.08     | 0.04    | 0.07     | 0.07     | 0.07     | 0.07     | 0.07     | 0.08     | 0.07     | 0.16     | 0.12     | 0.07     | 0.12    |
| GH12       | 0.00     | 0.00     | 0.00     | 0.00     | 0.00     | 0.00    | 0.00     | 0.00     | 0.00     | 0.01     | 0.00     | 0.00     | 0.00     | 0.00     | 0.00     | 0.00     | 0.00    |
| GH91       | 0.03     | 0.03     | 0.04     | 0.07     | 0.00     | 0.01    | 0.01     | 0.02     | 0.03     | 0.04     | 0.05     | 0.03     | 0.01     | 0.06     | 0.02     | 0.01     | 0.02    |
| GT69       | 0.00     | 0.00     | 0.00     | 0.00     | 0.00     | 0.00    | 0.00     | 0.00     | 0.00     | 0.00     | 0.00     | 0.00     | 0.00     | 0.00     | 0.00     | 0.00     | 0.00    |
| GH106      | 0.21     | 0.37     | 0.28     | 0.37     | 0.41     | 0.40    | 0.24     | 0.30     | 0.18     | 0.24     | 0.29     | 0.24     | 0.52     | 0.38     | 0.31     | 0.18     | 0.37    |
| GT62       | 0.00     | 0.00     | 0.00     | 0.00     | 0.00     | 0.00    | 0.00     | 0.00     | 0.00     | 0.00     | 0.00     | 0.00     | 0.00     | 0.00     | 0.00     | 0.00     | 0.00    |
| GH17       | 0.00     | 0.00     | 0.00     | 0.00     | 0.00     | 0.00    | 0.01     | 0.00     | 0.00     | 0.00     | 0.00     | 0.00     | 0.00     | 0.00     | 0.00     | 0.00     | 0.00    |
| GH88       | 0.37     | 0.54     | 0.35     | 0.51     | 0.68     | 0.31    | 0.52     | 0.31     | 0.34     | 0.28     | 0.37     | 0.48     | 0.35     | 0.59     | 0.49     | 0.21     | 0.44    |
| CE5        | 0.00     | 0.00     | 0.00     | 0.00     | 0.00     | 0.00    | 0.00     | 0.00     | 0.00     | 0.00     | 0.00     | 0.00     | 0.00     | 0.00     | 0.00     | 0.00     | 0.00    |
| GT8        | 0.12     | 0.09     | 0.13     | 0.08     | 0.21     | 0.10    | 0.07     | 0.12     | 0.24     | 0.13     | 0.08     | 0.16     | 0.07     | 0.13     | 0.15     | 0.05     | 0.21    |
| GT50       | 0.00     | 0.00     | 0.00     | 0.00     | 0.00     | 0.00    | 0.00     | 0.00     | 0.00     | 0.00     | 0.00     | 0.00     | 0.00     | 0.00     | 0.00     | 0.00     | 0.00    |
| GT20       | 0.10     | 0.13     | 0.07     | 0.13     | 0.16     | 0.06    | 0.01     | 0.08     | 0.09     | 0.10     | 0.06     | 0.10     | 0.11     | 0.10     | 0.07     | 0.06     | 0.11    |
| PL9        | 0.05     | 0.07     | 0.12     | 0.10     | 0.10     | 0.10    | 0.01     | 0.13     | 0.04     | 0.06     | 0.05     | 0.05     | 0.05     | 0.13     | 0.06     | 0.07     | 0.04    |
| GH55       | 0.01     | 0.01     | 0.01     | 0.06     | 0.06     | 0.01    | 0.09     | 0.03     | 0.01     | 0.01     | 0.01     | 0.04     | 0.03     | 0.02     | 0.03     | 0.02     | 0.04    |
| GH64       | 0.00     | 0.00     | 0.00     | 0.00     | 0.00     | 0.00    | 0.01     | 0.00     | 0.00     | 0.00     | 0.00     | 0.00     | 0.00     | 0.00     | 0.01     | 0.00     | 0.00    |
| GH127      | 0.30     | 0.33     | 0.24     | 0.37     | 0.54     | 0.34    | 0.37     | 0.29     | 0.36     | 0.30     | 0.28     | 0.46     | 0.37     | 0.47     | 0.46     | 0.24     | 0.36    |
| GH103      | 0.01     | 0.00     | 0.00     | 0.00     | 0.00     | 0.00    | 0.00     | 0.00     | 0.00     | 0.00     | 0.01     | 0.01     | 0.00     | 0.00     | 0.00     | 0.01     | 0.01    |
| GH3        | 2.90     | 3.17     | 2.46     | 4.01     | 4.41     | 2.74    | 2.93     | 2.47     | 3.23     | 2.68     | 2.36     | 3.29     | 3.14     | 3.30     | 3.57     | 2.55     | 3.09    |
| GT45       | 0.00     | 0.00     | 0.00     | 0.00     | 0.00     | 0.00    | 0.00     | 0.00     | 0.00     | 0.00     | 0.00     | 0.00     | 0.00     | 0.00     | 0.00     | 0.00     | 0.00    |
| GT74       | 0.00     | 0.00     | 0.00     | 0.00     | 0.00     | 0.00    | 0.00     | 0.00     | 0.00     | 0.00     | 0.00     | 0.00     | 0.00     | 0.00     | 0.00     | 0.00     | 0.00    |
| GT90       | 0.00     | 0.00     | 0.00     | 0.01     | 0.00     | 0.00    | 0.00     | 0.00     | 0.01     | 0.01     | 0.00     | 0.00     | 0.00     | 0.01     | 0.00     | 0.00     | 0.00    |
| GH116      | 0.08     | 0.11     | 0.03     | 0.08     | 0.21     | 0.05    | 0.04     | 0.03     | 0.18     | 0.04     | 0.04     | 0.00     | 0.05     | 0.10     | 0.11     | 0.08     | 0.10    |
| GH31       | 1.35     | 1.11     | 1.09     | 1.50     | 1.79     | 0.94    | 1.25     | 1.00     | 0.96     | 1.01     | 0.96     | 0.87     | 0.97     | 1.35     | 1.15     | 0.80     | 1.16    |
| GT12       | 0.00     | 0.00     | 0.00     | 0.00     | 0.00     | 0.00    | 0.00     | 0.00     | 0.00     | 0.00     | 0.00     | 0.00     | 0.00     | 0.00     | 0.00     | 0.00     | 0.00    |
| CE1        | 0.40     | 0.38     | 0.34     | 0.43     | 0.74     | 0.26    | 0.35     | 0.34     | 0.67     | 0.41     | 0.29     | 0.57     | 0.52     | 0.44     | 0.51     | 0.34     | 0.42    |
| GH121      | 0.00     | 0.00     | 0.00     | 0.02     | 0.00     | 0.00    | 0.09     | 0.00     | 0.00     | 0.00     | 0.00     | 0.00     | 0.01     | 0.00     | 0.02     | 0.05     | 0.00    |
| GH79       | 0.00     | 0.00     | 0.01     | 0.00     | 0.00     | 0.01    | 0.00     | 0.00     | 0.00     | 0.00     | 0.00     | 0.00     | 0.00     | 0.00     | 0.00     | 0.00     | 0.00    |
| GT73       | 0.00     | 0.00     | 0.00     | 0.00     | 0.00     | 0.00    | 0.00     | 0.00     | 0.00     | 0.00     | 0.00     | 0.00     | 0.00     | 0.00     | 0.00     | 0.00     | 0.00    |
| GH77       | 0.65     | 0.42     | 0.69     | 0.82     | 0.99     | 0.51    | 0.91     | 0.66     | 0.52     | 0.58     | 0.47     | 0.56     | 0.60     | 0.86     | 0.82     | 0.52     | 0.51    |
| PL17       | 0.00     | 0.00     | 0.00     | 0.00     | 0.00     | 0.03    | 0.06     | 0.01     | 0.00     | 0.01     | 0.00     | 0.01     | 0.03     | 0.00     | 0.00     | 0.00     | 0.00    |
| PL8        | 0.30     | 0.49     | 0.16     | 0.35     | 0.56     | 0.13    | 0.36     | 0.22     | 0.38     | 0.27     | 0.32     | 0.40     | 0.18     | 0.32     | 0.31     | 0.19     | 0.28    |

| CAZY_group | AM-AD-34 | AM-AD-35 | AM-AD-37 | AM-AD-38 | AM-AD-39 | AM-AD-4 | AM-AD-40 | AM-AD-41 | AM-AD-42 | AM-AD-43 | AM-AD-44 | AM-AD-45 | AM-AD-46 | AM-AD-47 | AM-AD-48 | AM-AD-49 | AM-AD-5 |
|------------|----------|----------|----------|----------|----------|---------|----------|----------|----------|----------|----------|----------|----------|----------|----------|----------|---------|
| CE9        | 0.44     | 0.36     | 0.40     | 0.44     | 0.64     | 0.28    | 0.42     | 0.41     | 0.31     | 0.33     | 0.40     | 0.33     | 0.30     | 0.53     | 0.32     | 0.34     | 0.31    |
| CE15       | 0.01     | 0.03     | 0.00     | 0.03     | 0.06     | 0.01    | 0.01     | 0.02     | 0.01     | 0.02     | 0.03     | 0.01     | 0.02     | 0.07     | 0.02     | 0.02     | 0.04    |
| GT79       | 0.00     | 0.00     | 0.00     | 0.00     | 0.00     | 0.00    | 0.00     | 0.00     | 0.00     | 0.00     | 0.00     | 0.00     | 0.00     | 0.00     | 0.00     | 0.00     | 0.00    |
| GT10       | 0.01     | 0.00     | 0.01     | 0.00     | 0.04     | 0.01    | 0.04     | 0.01     | 0.00     | 0.01     | 0.00     | 0.00     | 0.00     | 0.01     | 0.01     | 0.01     | 0.02    |
| GH119      | 0.00     | 0.00     | 0.00     | 0.00     | 0.00     | 0.00    | 0.00     | 0.00     | 0.00     | 0.00     | 0.00     | 0.00     | 0.00     | 0.00     | 0.00     | 0.00     | 0.00    |
| GH16       | 0.26     | 0.27     | 0.13     | 0.20     | 0.39     | 0.22    | 0.24     | 0.22     | 0.24     | 0.21     | 0.18     | 0.28     | 0.21     | 0.21     | 0.31     | 0.16     | 0.18    |
| GH43       | 2.21     | 2.76     | 1.85     | 2.65     | 3.73     | 1.76    | 2.10     | 1.93     | 2.32     | 2.02     | 1.75     | 2.23     | 2.12     | 2.45     | 3.01     | 1.74     | 2.52    |
| GH51       | 0.60     | 0.74     | 0.51     | 0.77     | 1.07     | 0.56    | 0.72     | 0.52     | 0.70     | 0.58     | 0.59     | 0.58     | 0.78     | 0.78     | 0.67     | 0.45     | 0.65    |
| GT35       | 0.87     | 0.78     | 1.12     | 1.42     | 1.13     | 0.97    | 1.08     | 1.04     | 0.75     | 1.12     | 0.86     | 0.80     | 1.00     | 1.12     | 1.37     | 1.08     | 0.81    |
| GT25       | 0.01     | 0.00     | 0.00     | 0.00     | 0.02     | 0.01    | 0.00     | 0.01     | 0.00     | 0.00     | 0.00     | 0.01     | 0.00     | 0.00     | 0.00     | 0.00     | 0.02    |
| GT2        | 4.49     | 4.26     | 4.47     | 6.04     | 6.76     | 4.55    | 5.97     | 4.65     | 5.08     | 4.71     | 3.80     | 5.56     | 5.33     | 6.07     | 6.06     | 3.93     | 5.61    |
| GT51       | 1.22     | 1.06     | 1.04     | 1.10     | 1.53     | 1.13    | 1.18     | 1.04     | 1.12     | 0.99     | 0.82     | 1.09     | 1.25     | 1.17     | 1.21     | 0.71     | 1.21    |
| GH107      | 0.00     | 0.00     | 0.00     | 0.00     | 0.00     | 0.00    | 0.00     | 0.00     | 0.00     | 0.00     | 0.00     | 0.00     | 0.00     | 0.00     | 0.00     | 0.00     | 0.00    |
| GH7        | 0.00     | 0.00     | 0.00     | 0.00     | 0.00     | 0.00    | 0.00     | 0.00     | 0.00     | 0.00     | 0.00     | 0.00     | 0.00     | 0.00     | 0.00     | 0.00     | 0.00    |
| GT7        | 0.00     | 0.00     | 0.00     | 0.00     | 0.00     | 0.00    | 0.00     | 0.00     | 0.00     | 0.00     | 0.00     | 0.00     | 0.00     | 0.00     | 0.00     | 0.00     | 0.00    |
| GT36       | 0.00     | 0.00     | 0.00     | 0.00     | 0.00     | 0.00    | 0.00     | 0.00     | 0.00     | 0.00     | 0.00     | 0.00     | 0.00     | 0.00     | 0.00     | 0.00     | 0.00    |
| PL7        | 0.00     | 0.00     | 0.00     | 0.00     | 0.00     | 0.00    | 0.01     | 0.00     | 0.00     | 0.00     | 0.00     | 0.00     | 0.00     | 0.00     | 0.00     | 0.00     | 0.00    |
| GH110      | 0.14     | 0.14     | 0.16     | 0.11     | 0.21     | 0.13    | 0.13     | 0.10     | 0.12     | 0.12     | 0.13     | 0.15     | 0.08     | 0.16     | 0.15     | 0.05     | 0.13    |
| GT21       | 0.00     | 0.00     | 0.00     | 0.00     | 0.00     | 0.00    | 0.00     | 0.00     | 0.00     | 0.00     | 0.00     | 0.00     | 0.00     | 0.00     | 0.00     | 0.00     | 0.00    |
| GH62       | 0.00     | 0.00     | 0.00     | 0.00     | 0.00     | 0.00    | 0.00     | 0.00     | 0.00     | 0.00     | 0.00     | 0.00     | 0.00     | 0.00     | 0.00     | 0.00     | 0.00    |
| GH125      | 0.20     | 0.29     | 0.19     | 0.27     | 0.39     | 0.16    | 0.22     | 0.18     | 0.19     | 0.14     | 0.23     | 0.25     | 0.23     | 0.25     | 0.30     | 0.17     | 0.21    |
| GH117      | 0.14     | 0.16     | 0.04     | 0.07     | 0.19     | 0.07    | 0.12     | 0.09     | 0.07     | 0.07     | 0.06     | 0.09     | 0.10     | 0.11     | 0.11     | 0.08     | 0.10    |
| GH68       | 0.00     | 0.00     | 0.00     | 0.00     | 0.00     | 0.00    | 0.00     | 0.00     | 0.00     | 0.00     | 0.00     | 0.00     | 0.00     | 0.00     | 0.00     | 0.00     | 0.00    |
| GH85       | 0.00     | 0.00     | 0.02     | 0.03     | 0.00     | 0.00    | 0.09     | 0.02     | 0.01     | 0.01     | 0.00     | 0.06     | 0.04     | 0.00     | 0.01     | 0.00     | 0.00    |
| GH92       | 1.94     | 2.66     | 1.59     | 2.04     | 3.48     | 1.48    | 2.20     | 1.71     | 1.69     | 1.77     | 1.53     | 2.12     | 1.68     | 2.47     | 2.27     | 1.33     | 2.21    |
| GH40       | 0.00     | 0.00     | 0.00     | 0.00     | 0.00     | 0.00    | 0.00     | 0.00     | 0.00     | 0.00     | 0.00     | 0.00     | 0.00     | 0.00     | 0.00     | 0.00     | 0.00    |
| GT49       | 0.00     | 0.00     | 0.00     | 0.00     | 0.00     | 0.00    | 0.00     | 0.00     | 0.00     | 0.00     | 0.00     | 0.00     | 0.00     | 0.00     | 0.00     | 0.00     | 0.00    |
| GH112      | 0.17     | 0.03     | 0.15     | 0.30     | 0.19     | 0.16    | 0.32     | 0.15     | 0.25     | 0.13     | 0.23     | 0.24     | 0.20     | 0.22     | 0.21     | 0.14     | 0.14    |
| GT67       | 0.00     | 0.00     | 0.00     | 0.00     | 0.00     | 0.00    | 0.00     | 0.00     | 0.00     | 0.00     | 0.00     | 0.00     | 0.00     | 0.00     | 0.00     | 0.00     | 0.00    |
| CE8        | 0.20     | 0.19     | 0.16     | 0.32     | 0.21     | 0.16    | 0.22     | 0.18     | 0.18     | 0.17     | 0.18     | 0.25     | 0.17     | 0.23     | 0.29     | 0.15     | 0.26    |
| GT86       | 0.00     | 0.00     | 0.00     | 0.00     | 0.00     | 0.00    | 0.00     | 0.00     | 0.00     | 0.00     | 0.00     | 0.00     | 0.00     | 0.00     | 0.00     | 0.00     | 0.00    |
| GH101      | 0.01     | 0.00     | 0.01     | 0.06     | 0.00     | 0.02    | 0.14     | 0.01     | 0.00     | 0.00     | 0.02     | 0.00     | 0.04     | 0.00     | 0.02     | 0.02     | 0.00    |
| GH81       | 0.00     | 0.00     | 0.00     | 0.01     | 0.00     | 0.00    | 0.04     | 0.01     | 0.00     | 0.00     | 0.01     | 0.00     | 0.00     | 0.00     | 0.02     | 0.00     | 0.00    |
| GT93       | 0.00     | 0.00     | 0.00     | 0.00     | 0.00     | 0.00    | 0.00     | 0.00     | 0.00     | 0.00     | 0.00     | 0.00     | 0.00     | 0.00     | 0.00     | 0.00     | 0.00    |
| GT63       | 0.00     | 0.00     | 0.00     | 0.00     | 0.00     | 0.00    | 0.00     | 0.00     | 0.00     | 0.00     | 0.00     | 0.00     | 0.00     | 0.00     | 0.00     | 0.00     | 0.00    |
| CE11       | 0.34     | 0.24     | 0.21     | 0.29     | 0.41     | 0.24    | 0.35     | 0.19     | 0.36     | 0.28     | 0.24     | 0.38     | 0.33     | 0.30     | 0.33     | 0.20     | 0.30    |
| GT19       | 0.24     | 0.24     | 0.10     | 0.10     | 0.21     | 0.13    | 0.22     | 0.14     | 0.16     | 0.13     | 0.12     | 0.19     | 0.21     | 0.20     | 0.19     | 0.12     | 0.16    |
| GT33       | 0.00     | 0.00     | 0.00     | 0.00     | 0.00     | 0.00    | 0.00     | 0.00     | 0.00     | 0.00     | 0.00     | 0.00     | 0.00     | 0.00     | 0.00     | 0.00     | 0.00    |
| GH21       | 0.00     | 0.00     | 0.00     | 0.00     | 0.00     | 0.00    | 0.00     | 0.00     | 0.00     | 0.00     | 0.00     | 0.00     | 0.00     | 0.00     | 0.00     | 0.00     | 0.00    |
| GT68       | 0.00     | 0.00     | 0.00     | 0.00     | 0.00     | 0.00    | 0.00     | 0.00     | 0.00     | 0.00     | 0.00     | 0.00     | 0.00     | 0.00     | 0.00     | 0.00     | 0.00    |
| GH89       | 0.25     | 0.39     | 0.19     | 0.24     | 0.21     | 0.18    | 0.32     | 0.27     | 0.16     | 0.33     | 0.15     | 0.28     | 0.21     | 0.41     | 0.18     | 0.18     | 0.28    |
| GT82       | 0.00     | 0.00     | 0.00     | 0.00     | 0.00     | 0.00    | 0.00     | 0.00     | 0.00     | 0.00     | 0.00     | 0.00     | 0.01     | 0.00     | 0.00     | 0.00     | 0.00    |
| GH30       | 0.29     | 0.33     | 0.21     | 0.31     | 0.33     | 0.17    | 0.30     | 0.23     | 0.31     | 0.18     | 0.27     | 0.23     | 0.25     | 0.27     | 0.34     | 0.16     | 0.24    |
| GH20       | 1.43     | 1.45     | 1.15     | 1.45     | 2.66     | 1.16    | 1.47     | 1.26     | 1.38     | 1.31     | 1.21     | 1.58     | 1.44     | 2.09     | 1.48     | 0.95     | 1.64    |
| GH52       | 0.00     | 0.00     | 0.00     | 0.00     | 0.00     | 0.00    | 0.00     | 0.00     | 0.00     | 0.00     | 0.00     | 0.00     | 0.00     | 0.00     | 0.00     | 0.00     | 0.00    |
| GT84       | 0.00     | 0.04     | 0.01     | 0.00     | 0.00     | 0.09    | 0.00     | 0.01     | 0.09     | 0.06     | 0.01     | 0.00     | 0.00     | 0.10     | 0.06     | 0.11     | 0.01    |
| GT15       | 0.00     | 0.00     | 0.00     | 0.00     | 0.00     | 0.00    | 0.00     | 0.00     | 0.00     | 0.00     | 0.00     | 0.00     | 0.00     | 0.00     | 0.00     | 0.00     | 0.00    |
| GH93       | 0.00     | 0.00     | 0.01     | 0.00     | 0.06     | 0.01    | 0.00     | 0.01     | 0.00     | 0.00     | 0.01     | 0.00     | 0.00     | 0.01     | 0.01     | 0.01     | 0.00    |
| PL16       | 0.00     | 0.00     | 0.00     | 0.00     | 0.00     | 0.00    | 0.00     | 0.00     | 0.00     | 0.00     | 0.00     | 0.00     | 0.00     | 0.00     | 0.00     | 0.00     | 0.00    |
| GH26       | 0.09     | 0.10     | 0.09     | 0.21     | 0.27     | 0.16    | 0.07     | 0.20     | 0.13     | 0.16     | 0.12     | 0.18     | 0.16     | 0.13     | 0.23     | 0.07     | 0.27    |





| CAZY_group | AM-AD-50 | AM-AD-51 | AM-AD-52 | AM-AD-53 | AM-AD-54 | AM-AD-55 | AM-AD-56 | AM-AD-57 | AM-AD-58 | AM-AD-59 | AM-AD-6 | AM-AD-60 | AM-AD-61 | AM-AD-62 |
|------------|----------|----------|----------|----------|----------|----------|----------|----------|----------|----------|---------|----------|----------|----------|
| GH29       | 0.63     | 1.02     | 0.85     | 0.71     | 0.76     | 0.97     | 0.75     | 1.28     | 0.43     | 0.85     | 1.50    | 0.45     | 1.31     | 0.77     |
| PL4        | 0.00     | 0.00     | 0.00     | 0.00     | 0.00     | 0.00     | 0.00     | 0.00     | 0.00     | 0.00     | 0.00    | 0.00     | 0.00     | 0.00     |
| GH23       | 1.09     | 1.37     | 1.40     | 1.24     | 1.05     | 1.38     | 1.32     | 1.54     | 1.26     | 1.45     | 1.57    | 1.15     | 1.69     | 1.15     |
| CE6        | 0.01     | 0.04     | 0.01     | 0.02     | 0.02     | 0.06     | 0.04     | 0.05     | 0.06     | 0.11     | 0.14    | 0.00     | 0.03     | 0.03     |
| GH72       | 0.19     | 0.13     | 0.16     | 0.13     | 0.13     | 0.15     | 0.13     | 0.12     | 0.11     | 0.09     | 0.14    | 0.14     | 0.10     | 0.13     |
| GH114      | 0.00     | 0.00     | 0.00     | 0.01     | 0.00     | 0.00     | 0.00     | 0.00     | 0.00     | 0.00     | 0.00    | 0.00     | 0.00     | 0.01     |
| GH78       | 0.66     | 1.23     | 0.72     | 0.81     | 0.93     | 1.81     | 0.96     | 1.69     | 0.68     | 1.35     | 2.09    | 0.62     | 1.34     | 1.09     |
| PL19       | 0.00     | 0.00     | 0.00     | 0.00     | 0.00     | 0.00     | 0.00     | 0.00     | 0.00     | 0.00     | 0.00    | 0.00     | 0.00     | 0.00     |
| GT27       | 0.00     | 0.00     | 0.00     | 0.00     | 0.00     | 0.00     | 0.00     | 0.00     | 0.00     | 0.00     | 0.00    | 0.00     | 0.00     | 0.00     |
| GH5        | 0.41     | 0.45     | 0.59     | 0.41     | 0.53     | 0.18     | 0.45     | 0.42     | 0.09     | 0.47     | 1.12    | 0.39     | 0.39     | 0.59     |
| GT40       | 0.00     | 0.00     | 0.00     | 0.00     | 0.00     | 0.00     | 0.00     | 0.00     | 0.00     | 0.00     | 0.00    | 0.00     | 0.00     | 0.00     |
| CE13       | 0.01     | 0.01     | 0.00     | 0.00     | 0.00     | 0.00     | 0.00     | 0.01     | 0.00     | 0.00     | 0.00    | 0.00     | 0.00     | 0.01     |
| GT37       | 0.00     | 0.00     | 0.00     | 0.00     | 0.00     | 0.00     | 0.00     | 0.00     | 0.00     | 0.00     | 0.00    | 0.00     | 0.00     | 0.00     |
| GH33       | 0.31     | 0.46     | 0.20     | 0.17     | 0.15     | 0.36     | 0.29     | 0.50     | 0.26     | 0.27     | 0.41    | 0.16     | 0.44     | 0.22     |
| GT65       | 0.00     | 0.00     | 0.00     | 0.00     | 0.00     | 0.00     | 0.00     | 0.00     | 0.00     | 0.00     | 0.00    | 0.00     | 0.00     | 0.00     |
| GH86       | 0.01     | 0.01     | 0.00     | 0.01     | 0.00     | 0.00     | 0.01     | 0.00     | 0.00     | 0.01     | 0.00    | 0.00     | 0.00     | 0.00     |
| GH123      | 0.06     | 0.21     | 0.11     | 0.12     | 0.08     | 0.17     | 0.13     | 0.28     | 0.09     | 0.14     | 0.25    | 0.10     | 0.24     | 0.17     |
| GH96       | 0.00     | 0.00     | 0.00     | 0.00     | 0.00     | 0.00     | 0.00     | 0.00     | 0.00     | 0.00     | 0.00    | 0.00     | 0.00     | 0.00     |
| GH14       | 0.01     | 0.00     | 0.00     | 0.00     | 0.00     | 0.00     | 0.00     | 0.00     | 0.00     | 0.00     | 0.00    | 0.00     | 0.00     | 0.00     |
| CE3        | 0.01     | 0.00     | 0.00     | 0.00     | 0.00     | 0.00     | 0.00     | 0.00     | 0.00     | 0.00     | 0.00    | 0.00     | 0.00     | 0.00     |
| PL10       | 0.06     | 0.16     | 0.14     | 0.13     | 0.09     | 0.15     | 0.11     | 0.24     | 0.15     | 0.16     | 0.20    | 0.03     | 0.13     | 0.12     |
| GT48       | 0.00     | 0.00     | 0.00     | 0.00     | 0.00     | 0.00     | 0.00     | 0.00     | 0.00     | 0.00     | 0.00    | 0.00     | 0.00     | 0.00     |
| PL6        | 0.00     | 0.00     | 0.00     | 0.00     | 0.00     | 0.00     | 0.03     | 0.00     | 0.00     | 0.01     | 0.02    | 0.00     | 0.00     | 0.00     |
| GT83       | 0.04     | 0.13     | 0.03     | 0.08     | 0.09     | 0.17     | 0.11     | 0.27     | 0.09     | 0.05     | 0.23    | 0.05     | 0.29     | 0.12     |
| GH126      | 0.00     | 0.00     | 0.00     | 0.00     | 0.00     | 0.00     | 0.00     | 0.00     | 0.00     | 0.00     | 0.00    | 0.00     | 0.00     | 0.00     |
| GH9        | 0.24     | 0.30     | 0.28     | 0.16     | 0.28     | 0.08     | 0.17     | 0.11     | 0.09     | 0.19     | 0.32    | 0.20     | 0.29     | 0.15     |
| GH75       | 0.00     | 0.00     | 0.00     | 0.00     | 0.00     | 0.00     | 0.00     | 0.00     | 0.00     | 0.00     | 0.00    | 0.00     | 0.00     | 0.00     |
| GT71       | 0.00     | 0.00     | 0.00     | 0.00     | 0.00     | 0.00     | 0.00     | 0.00     | 0.00     | 0.00     | 0.00    | 0.00     | 0.00     | 0.00     |
| GH46       | 0.01     | 0.01     | 0.00     | 0.00     | 0.00     | 0.00     | 0.00     | 0.00     | 0.00     | 0.00     | 0.00    | 0.00     | 0.00     | 0.00     |
| GT61       | 0.00     | 0.00     | 0.00     | 0.00     | 0.00     | 0.00     | 0.00     | 0.00     | 0.00     | 0.00     | 0.00    | 0.00     | 0.00     | 0.00     |
| GT3        | 0.12     | 0.33     | 0.24     | 0.14     | 0.25     | 0.33     | 0.27     | 0.50     | 0.15     | 0.22     | 0.23    | 0.18     | 0.51     | 0.27     |
| PL3        | 0.00     | 0.00     | 0.00     | 0.01     | 0.00     | 0.00     | 0.00     | 0.00     | 0.00     | 0.01     | 0.00    | 0.00     | 0.00     | 0.00     |
| GH108      | 0.02     | 0.04     | 0.02     | 0.04     | 0.02     | 0.03     | 0.03     | 0.03     | 0.02     | 0.07     | 0.07    | 0.01     | 0.06     | 0.03     |
| GT56       | 0.00     | 0.00     | 0.00     | 0.00     | 0.00     | 0.00     | 0.00     | 0.00     | 0.00     | 0.00     | 0.00    | 0.00     | 0.00     | 0.00     |
| PL11       | 0.11     | 0.15     | 0.25     | 0.13     | 0.15     | 0.29     | 0.17     | 0.36     | 0.11     | 0.16     | 0.41    | 0.07     | 0.21     | 0.23     |
| GH45       | 0.00     | 0.00     | 0.00     | 0.01     | 0.00     | 0.00     | 0.00     | 0.00     | 0.00     | 0.00     | 0.00    | 0.00     | 0.00     | 0.00     |
| GT34       | 0.01     | 0.00     | 0.01     | 0.00     | 0.00     | 0.00     | 0.00     | 0.00     | 0.00     | 0.00     | 0.00    | 0.00     | 0.00     | 0.00     |
| PL14       | 0.00     | 0.00     | 0.00     | 0.00     | 0.00     | 0.00     | 0.00     | 0.00     | 0.00     | 0.00     | 0.00    | 0.00     | 0.00     | 0.00     |
| GH19       | 0.00     | 0.00     | 0.00     | 0.01     | 0.00     | 0.02     | 0.04     | 0.00     | 0.02     | 0.01     | 0.00    | 0.00     | 0.01     | 0.01     |
| GH118      | 0.00     | 0.00     | 0.00     | 0.00     | 0.00     | 0.00     | 0.00     | 0.00     | 0.00     | 0.00     | 0.00    | 0.00     | 0.00     | 0.00     |
| GH82       | 0.00     | 0.00     | 0.00     | 0.00     | 0.00     | 0.00     | 0.00     | 0.00     | 0.00     | 0.00     | 0.00    | 0.00     | 0.00     | 0.00     |
| GH76       | 0.06     | 0.27     | 0.15     | 0.20     | 0.18     | 0.52     | 0.16     | 0.45     | 0.15     | 0.32     | 0.75    | 0.13     | 0.38     | 0.20     |
| GT4        | 1.86     | 3.11     | 2.36     | 1.84     | 2.07     | 2.61     | 2.33     | 2.47     | 1.96     | 1.99     | 3.19    | 1.78     | 3.13     | 2.16     |
| GT87       | 0.00     | 0.00     | 0.01     | 0.00     | 0.00     | 0.00     | 0.00     | 0.00     | 0.02     | 0.00     | 0.00    | 0.00     | 0.00     | 0.00     |
| GH24       | 0.09     | 0.10     | 0.06     | 0.08     | 0.12     | 0.17     | 0.14     | 0.18     | 0.19     | 0.12     | 0.20    | 0.09     | 0.06     | 0.11     |
| GH90       | 0.00     | 0.00     | 0.00     | 0.00     | 0.00     | 0.00     | 0.00     | 0.00     | 0.00     | 0.00     | 0.00    | 0.00     | 0.00     | 0.00     |
| GH57       | 0.09     | 0.22     | 0.18     | 0.17     | 0.23     | 0.18     | 0.22     | 0.35     | 0.07     | 0.21     | 0.25    | 0.16     | 0.24     | 0.16     |
| GH36       | 0.94     | 1.14     | 1.06     | 0.62     | 0.71     | 1.09     | 1.02     | 1.11     | 0.48     | 0.69     | 1.39    | 0.72     | 0.99     | 0.81     |
| GT46       | 0.00     | 0.00     | 0.00     | 0.00     | 0.00     | 0.00     | 0.00     | 0.00     | 0.00     | 0.00     | 0.00    | 0.00     | 0.00     | 0.00     |
| GH66       | 0.01     | 0.05     | 0.03     | 0.04     | 0.03     | 0.08     | 0.04     | 0.09     | 0.00     | 0.06     | 0.14    | 0.01     | 0.04     | 0.03     |





| CAZY_group | AM-AD-50 | AM-AD-51 | AM-AD-52 | AM-AD-53 | AM-AD-54 | AM-AD-55 | AM-AD-56 | AM-AD-57 | AM-AD-58 | AM-AD-59 | AM-AD-6 | AM-AD-60 | AM-AD-61 | AM-AD-62 |
|------------|----------|----------|----------|----------|----------|----------|----------|----------|----------|----------|---------|----------|----------|----------|
| GT76       | 0.00     | 0.00     | 0.00     | 0.00     | 0.00     | 0.00     | 0.00     | 0.00     | 0.00     | 0.00     | 0.00    | 0.00     | 0.00     | 0.00     |
| GT32       | 0.08     | 0.13     | 0.13     | 0.13     | 0.06     | 0.07     | 0.20     | 0.12     | 0.10     | 0.09     | 0.04    | 0.09     | 0.07     | 0.18     |
| GT47       | 0.12     | 0.13     | 0.09     | 0.09     | 0.07     | 0.06     | 0.03     | 0.08     | 0.08     | 0.00     | 0.07    | 0.05     | 0.05     | 0.04     |
| GH84       | 0.09     | 0.11     | 0.09     | 0.13     | 0.11     | 0.11     | 0.18     | 0.16     | 0.21     | 0.11     | 0.05    | 0.14     | 0.08     | 0.15     |
| GH83       | 0.00     | 0.00     | 0.00     | 0.00     | 0.00     | 0.00     | 0.00     | 0.00     | 0.00     | 0.00     | 0.00    | 0.00     | 0.00     | 0.00     |
| GT59       | 0.00     | 0.00     | 0.00     | 0.00     | 0.00     | 0.00     | 0.00     | 0.00     | 0.00     | 0.00     | 0.00    | 0.00     | 0.00     | 0.00     |
| GH34       | 0.00     | 0.00     | 0.00     | 0.00     | 0.00     | 0.00     | 0.00     | 0.00     | 0.00     | 0.00     | 0.00    | 0.00     | 0.00     | 0.00     |
| GT14       | 0.03     | 0.04     | 0.02     | 0.01     | 0.03     | 0.03     | 0.01     | 0.08     | 0.00     | 0.06     | 0.07    | 0.02     | 0.04     | 0.03     |
| GH47       | 0.00     | 0.00     | 0.00     | 0.00     | 0.00     | 0.00     | 0.00     | 0.00     | 0.00     | 0.00     | 0.00    | 0.00     | 0.00     | 0.00     |
| GH97       | 0.29     | 1.36     | 0.88     | 0.67     | 1.12     | 1.84     | 0.81     | 1.65     | 0.56     | 1.41     | 2.21    | 0.44     | 1.43     | 1.04     |
| GH50       | 0.02     | 0.11     | 0.00     | 0.05     | 0.05     | 0.15     | 0.08     | 0.12     | 0.00     | 0.11     | 0.32    | 0.00     | 0.06     | 0.07     |
| GT26       | 0.19     | 0.25     | 0.18     | 0.15     | 0.21     | 0.18     | 0.18     | 0.16     | 0.24     | 0.14     | 0.27    | 0.15     | 0.23     | 0.20     |
| GH18       | 0.56     | 0.83     | 0.79     | 0.54     | 0.54     | 0.85     | 0.64     | 0.98     | 0.52     | 0.85     | 1.25    | 0.74     | 0.81     | 0.67     |
| GH37       | 0.00     | 0.02     | 0.01     | 0.00     | 0.01     | 0.00     | 0.03     | 0.02     | 0.00     | 0.00     | 0.00    | 0.01     | 0.01     | 0.04     |
| PL13       | 0.01     | 0.10     | 0.03     | 0.02     | 0.02     | 0.09     | 0.05     | 0.13     | 0.02     | 0.14     | 0.20    | 0.02     | 0.08     | 0.08     |
| GH27       | 0.26     | 0.46     | 0.31     | 0.25     | 0.27     | 0.39     | 0.28     | 0.47     | 0.20     | 0.33     | 0.43    | 0.24     | 0.56     | 0.29     |
| GT54       | 0.00     | 0.00     | 0.00     | 0.00     | 0.00     | 0.00     | 0.00     | 0.00     | 0.00     | 0.00     | 0.00    | 0.00     | 0.00     | 0.00     |
| GT91       | 0.00     | 0.00     | 0.00     | 0.00     | 0.00     | 0.00     | 0.00     | 0.00     | 0.00     | 0.00     | 0.00    | 0.00     | 0.00     | 0.00     |
| GT72       | 0.00     | 0.00     | 0.00     | 0.00     | 0.00     | 0.00     | 0.00     | 0.00     | 0.00     | 0.00     | 0.00    | 0.00     | 0.00     | 0.00     |
| GH67       | 0.06     | 0.11     | 0.09     | 0.07     | 0.09     | 0.06     | 0.07     | 0.11     | 0.04     | 0.15     | 0.16    | 0.06     | 0.13     | 0.08     |
| GH12       | 0.00     | 0.00     | 0.00     | 0.01     | 0.00     | 0.00     | 0.00     | 0.00     | 0.00     | 0.00     | 0.00    | 0.00     | 0.00     | 0.00     |
| GH91       | 0.02     | 0.04     | 0.02     | 0.03     | 0.02     | 0.03     | 0.07     | 0.01     | 0.02     | 0.01     | 0.02    | 0.02     | 0.06     | 0.06     |
| GT69       | 0.00     | 0.00     | 0.00     | 0.00     | 0.00     | 0.00     | 0.00     | 0.00     | 0.00     | 0.00     | 0.00    | 0.00     | 0.00     | 0.00     |
| GH106      | 0.18     | 0.33     | 0.39     | 0.27     | 0.24     | 0.73     | 0.45     | 0.52     | 0.09     | 0.46     | 0.71    | 0.10     | 0.39     | 0.29     |
| GT62       | 0.00     | 0.00     | 0.00     | 0.00     | 0.00     | 0.00     | 0.00     | 0.00     | 0.00     | 0.00     | 0.00    | 0.00     | 0.00     | 0.00     |
| GH17       | 0.00     | 0.00     | 0.00     | 0.00     | 0.00     | 0.00     | 0.00     | 0.00     | 0.00     | 0.00     | 0.00    | 0.00     | 0.00     | 0.00     |
| GH88       | 0.17     | 0.63     | 0.36     | 0.37     | 0.41     | 0.70     | 0.45     | 0.83     | 0.20     | 0.47     | 0.89    | 0.22     | 0.77     | 0.52     |
| CE5        | 0.00     | 0.00     | 0.00     | 0.00     | 0.00     | 0.00     | 0.00     | 0.00     | 0.00     | 0.00     | 0.00    | 0.00     | 0.00     | 0.00     |
| GT8        | 0.16     | 0.21     | 0.20     | 0.06     | 0.10     | 0.05     | 0.14     | 0.10     | 0.06     | 0.09     | 0.16    | 0.12     | 0.11     | 0.13     |
| GT50       | 0.00     | 0.00     | 0.00     | 0.00     | 0.00     | 0.00     | 0.00     | 0.00     | 0.00     | 0.00     | 0.00    | 0.00     | 0.00     | 0.00     |
| GT20       | 0.05     | 0.13     | 0.07     | 0.08     | 0.06     | 0.11     | 0.08     | 0.23     | 0.07     | 0.05     | 0.16    | 0.06     | 0.19     | 0.10     |
| PL9        | 0.11     | 0.10     | 0.12     | 0.08     | 0.07     | 0.09     | 0.13     | 0.12     | 0.13     | 0.06     | 0.11    | 0.04     | 0.09     | 0.14     |
| GH55       | 0.02     | 0.05     | 0.02     | 0.04     | 0.05     | 0.02     | 0.01     | 0.01     | 0.02     | 0.05     | 0.07    | 0.07     | 0.19     | 0.03     |
| GH64       | 0.00     | 0.00     | 0.00     | 0.01     | 0.00     | 0.00     | 0.00     | 0.00     | 0.00     | 0.00     | 0.00    | 0.01     | 0.01     | 0.00     |
| GH127      | 0.33     | 0.41     | 0.43     | 0.20     | 0.40     | 0.32     | 0.27     | 0.61     | 0.13     | 0.36     | 0.55    | 0.19     | 0.42     | 0.37     |
| GH103      | 0.00     | 0.00     | 0.01     | 0.01     | 0.00     | 0.02     | 0.01     | 0.00     | 0.00     | 0.00     | 0.00    | 0.00     | 0.00     | 0.00     |
| GH3        | 2.61     | 3.61     | 2.90     | 2.90     | 2.90     | 3.26     | 2.76     | 4.17     | 2.13     | 3.68     | 5.28    | 2.28     | 4.32     | 2.92     |
| GT45       | 0.00     | 0.00     | 0.00     | 0.00     | 0.00     | 0.00     | 0.00     | 0.00     | 0.00     | 0.00     | 0.00    | 0.00     | 0.00     | 0.00     |
| GT74       | 0.00     | 0.00     | 0.00     | 0.00     | 0.00     | 0.00     | 0.00     | 0.00     | 0.00     | 0.00     | 0.00    | 0.00     | 0.00     | 0.00     |
| GT90       | 0.00     | 0.01     | 0.00     | 0.00     | 0.00     | 0.00     | 0.00     | 0.00     | 0.00     | 0.00     | 0.02    | 0.00     | 0.00     | 0.00     |
| GH116      | 0.02     | 0.04     | 0.06     | 0.04     | 0.09     | 0.06     | 0.07     | 0.09     | 0.07     | 0.07     | 0.11    | 0.02     | 0.20     | 0.06     |
| GH31       | 1.10     | 1.22     | 1.23     | 0.73     | 1.10     | 1.24     | 1.05     | 1.20     | 0.81     | 1.33     | 1.59    | 0.81     | 1.42     | 1.09     |
| GT12       | 0.00     | 0.00     | 0.00     | 0.00     | 0.00     | 0.00     | 0.00     | 0.00     | 0.00     | 0.00     | 0.00    | 0.00     | 0.00     | 0.00     |
| CE1        | 0.22     | 0.47     | 0.37     | 0.29     | 0.41     | 0.43     | 0.32     | 0.50     | 0.26     | 0.37     | 0.82    | 0.26     | 0.62     | 0.38     |
| GH121      | 0.04     | 0.00     | 0.05     | 0.00     | 0.00     | 0.00     | 0.00     | 0.00     | 0.00     | 0.00     | 0.00    | 0.00     | 0.00     | 0.00     |
| GH79       | 0.00     | 0.02     | 0.00     | 0.00     | 0.00     | 0.00     | 0.00     | 0.00     | 0.00     | 0.00     | 0.00    | 0.00     | 0.00     | 0.00     |
| GT73       | 0.00     | 0.00     | 0.00     | 0.00     | 0.00     | 0.00     | 0.00     | 0.00     | 0.00     | 0.00     | 0.00    | 0.00     | 0.00     | 0.00     |
| GH77       | 0.92     | 0.71     | 0.71     | 0.54     | 0.57     | 0.49     | 0.75     | 0.59     | 0.52     | 0.69     | 0.86    | 0.67     | 0.85     | 0.58     |
| PL17       | 0.00     | 0.01     | 0.00     | 0.00     | 0.01     | 0.02     | 0.00     | 0.00     | 0.00     | 0.00     | 0.02    | 0.00     | 0.00     | 0.00     |
| PL8        | 0.11     | 0.38     | 0.36     | 0.24     | 0.22     | 0.43     | 0.28     | 0.60     | 0.17     | 0.36     | 0.55    | 0.13     | 0.42     | 0.35     |

| CAZY_group | AM-AD-50 | AM-AD-51 | AM-AD-52 | AM-AD-53 | AM-AD-54 | AM-AD-55 | AM-AD-56 | AM-AD-57 | AM-AD-58 | AM-AD-59 | AM-AD-6 | AM-AD-60 | AM-AD-61 | AM-AD-62 |
|------------|----------|----------|----------|----------|----------|----------|----------|----------|----------|----------|---------|----------|----------|----------|
| CE9        | 0.42     | 0.46     | 0.38     | 0.30     | 0.26     | 0.59     | 0.38     | 0.45     | 0.41     | 0.38     | 0.52    | 0.24     | 0.48     | 0.38     |
| CE15       | 0.00     | 0.01     | 0.04     | 0.00     | 0.01     | 0.02     | 0.01     | 0.04     | 0.02     | 0.06     | 0.00    | 0.01     | 0.01     | 0.01     |
| GT79       | 0.00     | 0.00     | 0.00     | 0.00     | 0.00     | 0.00     | 0.00     | 0.00     | 0.00     | 0.00     | 0.00    | 0.00     | 0.00     | 0.00     |
| GT10       | 0.01     | 0.01     | 0.01     | 0.01     | 0.01     | 0.02     | 0.02     | 0.02     | 0.02     | 0.00     | 0.02    | 0.01     | 0.00     | 0.01     |
| GH119      | 0.00     | 0.00     | 0.00     | 0.00     | 0.00     | 0.00     | 0.00     | 0.00     | 0.00     | 0.00     | 0.00    | 0.00     | 0.00     | 0.00     |
| GH16       | 0.12     | 0.40     | 0.18     | 0.25     | 0.24     | 0.27     | 0.18     | 0.37     | 0.09     | 0.23     | 0.23    | 0.21     | 0.43     | 0.26     |
| GH43       | 1.71     | 2.47     | 2.74     | 1.57     | 2.26     | 3.07     | 1.64     | 3.57     | 1.13     | 3.32     | 4.96    | 1.25     | 2.79     | 2.44     |
| GH51       | 0.71     | 0.65     | 0.81     | 0.43     | 0.68     | 0.70     | 0.53     | 0.79     | 0.35     | 0.59     | 1.12    | 0.40     | 0.81     | 0.68     |
| GT35       | 1.50     | 1.09     | 1.39     | 0.84     | 0.96     | 0.64     | 0.95     | 0.59     | 0.80     | 0.74     | 0.68    | 1.28     | 1.11     | 0.85     |
| GT25       | 0.00     | 0.00     | 0.00     | 0.00     | 0.00     | 0.02     | 0.01     | 0.00     | 0.00     | 0.00     | 0.02    | 0.00     | 0.00     | 0.01     |
| GT2        | 4.95     | 6.00     | 5.29     | 3.94     | 4.44     | 4.96     | 4.78     | 6.04     | 3.66     | 4.63     | 6.46    | 4.31     | 6.15     | 4.99     |
| GT51       | 0.82     | 1.16     | 1.13     | 0.93     | 0.91     | 1.09     | 1.25     | 1.43     | 0.74     | 0.95     | 1.12    | 0.81     | 1.11     | 1.16     |
| GH107      | 0.00     | 0.00     | 0.00     | 0.00     | 0.00     | 0.00     | 0.00     | 0.00     | 0.00     | 0.00     | 0.00    | 0.00     | 0.00     | 0.00     |
| GH7        | 0.00     | 0.00     | 0.00     | 0.00     | 0.00     | 0.00     | 0.00     | 0.00     | 0.00     | 0.00     | 0.00    | 0.00     | 0.00     | 0.00     |
| GT7        | 0.00     | 0.00     | 0.00     | 0.00     | 0.00     | 0.00     | 0.00     | 0.00     | 0.00     | 0.00     | 0.00    | 0.00     | 0.00     | 0.00     |
| GT36       | 0.00     | 0.00     | 0.00     | 0.00     | 0.00     | 0.00     | 0.00     | 0.00     | 0.00     | 0.00     | 0.00    | 0.00     | 0.00     | 0.00     |
| PL7        | 0.00     | 0.00     | 0.00     | 0.00     | 0.00     | 0.00     | 0.00     | 0.00     | 0.00     | 0.00     | 0.00    | 0.00     | 0.00     | 0.00     |
| GH110      | 0.09     | 0.16     | 0.14     | 0.11     | 0.11     | 0.26     | 0.14     | 0.28     | 0.07     | 0.10     | 0.34    | 0.08     | 0.18     | 0.15     |
| GT21       | 0.00     | 0.00     | 0.00     | 0.00     | 0.00     | 0.00     | 0.00     | 0.00     | 0.00     | 0.00     | 0.00    | 0.00     | 0.00     | 0.00     |
| GH62       | 0.00     | 0.00     | 0.00     | 0.00     | 0.00     | 0.00     | 0.00     | 0.00     | 0.00     | 0.00     | 0.00    | 0.00     | 0.00     | 0.00     |
| GH125      | 0.09     | 0.32     | 0.22     | 0.16     | 0.17     | 0.41     | 0.24     | 0.41     | 0.09     | 0.28     | 0.57    | 0.10     | 0.32     | 0.20     |
| GH117      | 0.05     | 0.13     | 0.09     | 0.12     | 0.08     | 0.18     | 0.11     | 0.21     | 0.09     | 0.14     | 0.16    | 0.06     | 0.19     | 0.12     |
| GH68       | 0.00     | 0.00     | 0.00     | 0.00     | 0.00     | 0.00     | 0.00     | 0.00     | 0.00     | 0.00     | 0.00    | 0.00     | 0.00     | 0.00     |
| GH85       | 0.05     | 0.03     | 0.03     | 0.01     | 0.05     | 0.00     | 0.01     | 0.00     | 0.00     | 0.00     | 0.00    | 0.00     | 0.03     | 0.03     |
| GH92       | 0.80     | 2.50     | 1.99     | 1.28     | 1.80     | 3.86     | 1.74     | 3.88     | 1.37     | 2.55     | 5.28    | 0.88     | 3.07     | 2.14     |
| GH40       | 0.00     | 0.00     | 0.00     | 0.00     | 0.00     | 0.00     | 0.00     | 0.00     | 0.00     | 0.00     | 0.00    | 0.00     | 0.00     | 0.00     |
| GT49       | 0.00     | 0.01     | 0.00     | 0.00     | 0.00     | 0.00     | 0.00     | 0.00     | 0.00     | 0.00     | 0.00    | 0.00     | 0.00     | 0.00     |
| GH112      | 0.24     | 0.19     | 0.14     | 0.18     | 0.11     | 0.11     | 0.17     | 0.11     | 0.19     | 0.20     | 0.11    | 0.17     | 0.11     | 0.15     |
| GT67       | 0.00     | 0.00     | 0.00     | 0.00     | 0.00     | 0.00     | 0.00     | 0.00     | 0.00     | 0.00     | 0.00    | 0.00     | 0.00     | 0.00     |
| CE8        | 0.18     | 0.33     | 0.30     | 0.23     | 0.18     | 0.27     | 0.23     | 0.41     | 0.19     | 0.35     | 0.41    | 0.09     | 0.23     | 0.26     |
| GT86       | 0.00     | 0.00     | 0.00     | 0.00     | 0.00     | 0.00     | 0.00     | 0.00     | 0.00     | 0.00     | 0.00    | 0.00     | 0.00     | 0.00     |
| GH101      | 0.05     | 0.00     | 0.05     | 0.00     | 0.00     | 0.02     | 0.00     | 0.00     | 0.00     | 0.00     | 0.00    | 0.01     | 0.00     | 0.00     |
| GH81       | 0.00     | 0.00     | 0.01     | 0.02     | 0.01     | 0.00     | 0.00     | 0.00     | 0.00     | 0.00     | 0.00    | 0.02     | 0.04     | 0.00     |
| GT93       | 0.00     | 0.00     | 0.00     | 0.00     | 0.00     | 0.00     | 0.00     | 0.00     | 0.00     | 0.00     | 0.00    | 0.00     | 0.00     | 0.00     |
| GT63       | 0.00     | 0.00     | 0.00     | 0.00     | 0.00     | 0.00     | 0.00     | 0.00     | 0.00     | 0.00     | 0.00    | 0.00     | 0.00     | 0.00     |
| CE11       | 0.16     | 0.32     | 0.25     | 0.21     | 0.30     | 0.35     | 0.26     | 0.51     | 0.26     | 0.26     | 0.34    | 0.20     | 0.38     | 0.24     |
| GT19       | 0.10     | 0.17     | 0.14     | 0.13     | 0.14     | 0.24     | 0.21     | 0.28     | 0.15     | 0.21     | 0.27    | 0.08     | 0.25     | 0.19     |
| GT33       | 0.00     | 0.00     | 0.00     | 0.00     | 0.00     | 0.00     | 0.00     | 0.00     | 0.00     | 0.00     | 0.00    | 0.00     | 0.00     | 0.00     |
| GH21       | 0.00     | 0.00     | 0.00     | 0.00     | 0.00     | 0.00     | 0.00     | 0.00     | 0.00     | 0.00     | 0.00    | 0.00     | 0.00     | 0.00     |
| GT68       | 0.00     | 0.00     | 0.00     | 0.00     | 0.00     | 0.00     | 0.00     | 0.00     | 0.00     | 0.00     | 0.00    | 0.00     | 0.00     | 0.00     |
| GH89       | 0.09     | 0.31     | 0.27     | 0.28     | 0.27     | 0.39     | 0.29     | 0.42     | 0.17     | 0.37     | 0.61    | 0.17     | 0.42     | 0.31     |
| GT82       | 0.00     | 0.00     | 0.00     | 0.00     | 0.00     | 0.00     | 0.00     | 0.01     | 0.00     | 0.00     | 0.00    | 0.00     | 0.00     | 0.00     |
| GH30       | 0.19     | 0.22     | 0.30     | 0.23     | 0.18     | 0.43     | 0.22     | 0.40     | 0.19     | 0.35     | 0.57    | 0.13     | 0.33     | 0.31     |
| GH20       | 0.76     | 1.98     | 1.28     | 1.21     | 1.14     | 2.23     | 1.37     | 2.67     | 0.83     | 1.40     | 2.98    | 0.73     | 2.49     | 1.40     |
| GH52       | 0.00     | 0.00     | 0.00     | 0.00     | 0.00     | 0.00     | 0.00     | 0.00     | 0.00     | 0.00     | 0.00    | 0.00     | 0.00     | 0.00     |
| GT84       | 0.12     | 0.06     | 0.10     | 0.03     | 0.08     | 0.00     | 0.09     | 0.02     | 0.00     | 0.02     | 0.00    | 0.07     | 0.01     | 0.03     |
| GT15       | 0.00     | 0.00     | 0.00     | 0.00     | 0.00     | 0.00     | 0.00     | 0.00     | 0.00     | 0.00     | 0.00    | 0.00     | 0.00     | 0.00     |
| GH93       | 0.00     | 0.00     | 0.00     | 0.00     | 0.00     | 0.02     | 0.01     | 0.01     | 0.00     | 0.00     | 0.00    | 0.00     | 0.00     | 0.01     |
| PL16       | 0.00     | 0.00     | 0.00     | 0.00     | 0.00     | 0.00     | 0.00     | 0.00     | 0.00     | 0.00     | 0.00    | 0.00     | 0.00     | 0.00     |
| GH26       | 0.12     | 0.16     | 0.20     | 0.11     | 0.20     | 0.08     | 0.18     | 0.11     | 0.04     | 0.09     | 0.25    | 0.11     | 0.08     | 0.20     |



| CAZY_group | AM-AD-50 | AM-AD-51 | AM-AD-52 | AM-AD-53 | AM-AD-54 | AM-AD-55 | AM-AD-56 | AM-AD-57 | AM-AD-58 | AM-AD-59 | AM-AD-6 | AM-AD-60 | AM-AD-61 | AM-AD-62 |
|------------|----------|----------|----------|----------|----------|----------|----------|----------|----------|----------|---------|----------|----------|----------|
| GT52       | 0.00     | 0.00     | 0.00     | 0.00     | 0.00     | 0.00     | 0.00     | 0.00     | 0.00     | 0.00     | 0.00    | 0.00     | 0.00     | 0.00     |
| GT64       | 0.00     | 0.00     | 0.00     | 0.00     | 0.00     | 0.00     | 0.00     | 0.00     | 0.00     | 0.00     | 0.00    | 0.00     | 0.00     | 0.00     |
| GT85       | 0.00     | 0.00     | 0.00     | 0.00     | 0.00     | 0.00     | 0.00     | 0.00     | 0.00     | 0.00     | 0.00    | 0.00     | 0.00     | 0.00     |
| GT16       | 0.00     | 0.00     | 0.00     | 0.00     | 0.00     | 0.00     | 0.00     | 0.00     | 0.00     | 0.00     | 0.00    | 0.00     | 0.00     | 0.00     |
| GH56       | 0.00     | 0.00     | 0.00     | 0.00     | 0.00     | 0.00     | 0.00     | 0.00     | 0.00     | 0.00     | 0.00    | 0.00     | 0.00     | 0.00     |
| GT60       | 0.00     | 0.00     | 0.00     | 0.00     | 0.00     | 0.00     | 0.00     | 0.00     | 0.00     | 0.00     | 0.00    | 0.00     | 0.00     | 0.00     |
| GH41       | 0.00     | 0.00     | 0.00     | 0.00     | 0.00     | 0.00     | 0.00     | 0.00     | 0.00     | 0.00     | 0.00    | 0.00     | 0.00     | 0.00     |
| CE7        | 0.06     | 0.17     | 0.10     | 0.10     | 0.08     | 0.21     | 0.13     | 0.15     | 0.06     | 0.15     | 0.23    | 0.04     | 0.15     | 0.11     |
| GH39       | 0.09     | 0.10     | 0.05     | 0.05     | 0.02     | 0.00     | 0.04     | 0.00     | 0.02     | 0.01     | 0.02    | 0.03     | 0.08     | 0.04     |
| GT30       | 0.14     | 0.39     | 0.31     | 0.19     | 0.22     | 0.43     | 0.32     | 0.51     | 0.33     | 0.30     | 0.55    | 0.19     | 0.43     | 0.34     |
| PL15       | 0.03     | 0.14     | 0.07     | 0.16     | 0.07     | 0.26     | 0.11     | 0.22     | 0.07     | 0.22     | 0.50    | 0.04     | 0.13     | 0.13     |
| GH102      | 0.01     | 0.01     | 0.00     | 0.04     | 0.00     | 0.00     | 0.02     | 0.00     | 0.00     | 0.01     | 0.00    | 0.00     | 0.00     | 0.01     |

| CAZY_group | AM-AD-63 | AM-AD-64 | AM-AD-65 | AM-AD-66 | AM-AD-67 | AM-AD-68 | AM-AD-69 | AM-AD-7 | AM-AD-70 | AM-AD-71 | AM-AD-72 | AM-AD-73 | AM-AD-74 |
|------------|----------|----------|----------|----------|----------|----------|----------|---------|----------|----------|----------|----------|----------|
| GH29       | 0.81     | 1.03     | 1.48     | 1.19     | 1.08     | 0.95     | 0.85     | 0.87    | 0.58     | 0.94     | 0.74     | 0.55     | 1.18     |
| PL4        | 0.00     | 0.00     | 0.00     | 0.00     | 0.00     | 0.00     | 0.00     | 0.00    | 0.00     | 0.00     | 0.00     | 0.00     | 0.00     |
| GH23       | 1.21     | 1.53     | 1.51     | 1.92     | 1.69     | 1.35     | 1.29     | 1.31    | 1.03     | 1.55     | 1.18     | 1.20     | 1.34     |
| CE6        | 0.04     | 0.08     | 0.08     | 0.07     | 0.05     | 0.09     | 0.03     | 0.04    | 0.02     | 0.03     | 0.03     | 0.05     | 0.07     |
| GH72       | 0.14     | 0.23     | 0.18     | 0.22     | 0.17     | 0.16     | 0.12     | 0.25    | 0.16     | 0.21     | 0.15     | 0.13     | 0.11     |
| GH114      | 0.01     | 0.00     | 0.00     | 0.00     | 0.00     | 0.00     | 0.00     | 0.00    | 0.00     | 0.00     | 0.00     | 0.00     | 0.01     |
| GH78       | 0.80     | 0.78     | 1.77     | 1.77     | 1.23     | 1.66     | 1.14     | 0.89    | 1.02     | 0.78     | 1.12     | 1.06     | 1.32     |
| PL19       | 0.00     | 0.00     | 0.00     | 0.00     | 0.00     | 0.00     | 0.00     | 0.00    | 0.00     | 0.00     | 0.00     | 0.00     | 0.00     |
| GT27       | 0.00     | 0.00     | 0.00     | 0.00     | 0.00     | 0.00     | 0.00     | 0.00    | 0.00     | 0.00     | 0.00     | 0.00     | 0.00     |
| GH5        | 0.40     | 0.29     | 0.78     | 0.86     | 0.72     | 0.67     | 0.71     | 0.53    | 0.27     | 0.31     | 0.71     | 0.38     | 0.22     |
| GT40       | 0.00     | 0.00     | 0.00     | 0.00     | 0.00     | 0.00     | 0.00     | 0.00    | 0.00     | 0.00     | 0.00     | 0.00     | 0.00     |
| CE13       | 0.00     | 0.00     | 0.00     | 0.00     | 0.00     | 0.00     | 0.00     | 0.00    | 0.00     | 0.00     | 0.00     | 0.00     | 0.00     |
| GT37       | 0.00     | 0.00     | 0.00     | 0.00     | 0.00     | 0.00     | 0.00     | 0.00    | 0.00     | 0.00     | 0.00     | 0.00     | 0.00     |
| GH33       | 0.15     | 0.52     | 0.45     | 0.47     | 0.34     | 0.38     | 0.23     | 0.23    | 0.13     | 0.38     | 0.28     | 0.16     | 0.46     |
| GT65       | 0.00     | 0.00     | 0.00     | 0.00     | 0.00     | 0.00     | 0.00     | 0.00    | 0.00     | 0.00     | 0.00     | 0.00     | 0.00     |
| GH86       | 0.00     | 0.00     | 0.01     | 0.00     | 0.00     | 0.00     | 0.00     | 0.00    | 0.00     | 0.00     | 0.00     | 0.01     | 0.01     |
| GH123      | 0.09     | 0.27     | 0.37     | 0.15     | 0.22     | 0.15     | 0.16     | 0.14    | 0.06     | 0.08     | 0.13     | 0.15     | 0.25     |
| GH96       | 0.00     | 0.00     | 0.00     | 0.00     | 0.00     | 0.00     | 0.00     | 0.00    | 0.00     | 0.00     | 0.00     | 0.00     | 0.00     |
| GH14       | 0.00     | 0.00     | 0.00     | 0.00     | 0.00     | 0.00     | 0.00     | 0.00    | 0.00     | 0.00     | 0.00     | 0.00     | 0.00     |
| CE3        | 0.00     | 0.00     | 0.00     | 0.00     | 0.00     | 0.00     | 0.00     | 0.00    | 0.02     | 0.00     | 0.00     | 0.00     | 0.00     |
| PL10       | 0.11     | 0.08     | 0.14     | 0.17     | 0.19     | 0.15     | 0.19     | 0.12    | 0.09     | 0.16     | 0.14     | 0.11     | 0.16     |
| GT48       | 0.00     | 0.00     | 0.00     | 0.00     | 0.00     | 0.00     | 0.00     | 0.00    | 0.00     | 0.00     | 0.00     | 0.00     | 0.00     |
| PL6        | 0.00     | 0.00     | 0.00     | 0.07     | 0.01     | 0.00     | 0.00     | 0.00    | 0.01     | 0.00     | 0.00     | 0.00     | 0.01     |
| GT83       | 0.12     | 0.17     | 0.25     | 0.18     | 0.14     | 0.22     | 0.20     | 0.10    | 0.11     | 0.18     | 0.08     | 0.07     | 0.34     |
| GH126      | 0.00     | 0.00     | 0.00     | 0.00     | 0.00     | 0.00     | 0.00     | 0.00    | 0.00     | 0.00     | 0.00     | 0.00     | 0.00     |
| GH9        | 0.17     | 0.02     | 0.16     | 0.25     | 0.32     | 0.19     | 0.38     | 0.09    | 0.08     | 0.13     | 0.23     | 0.47     | 0.08     |
| GH75       | 0.00     | 0.00     | 0.00     | 0.00     | 0.00     | 0.00     | 0.00     | 0.00    | 0.00     | 0.00     | 0.00     | 0.01     | 0.00     |
| GT71       | 0.00     | 0.00     | 0.00     | 0.00     | 0.00     | 0.00     | 0.00     | 0.00    | 0.00     | 0.00     | 0.00     | 0.00     | 0.00     |
| GH46       | 0.01     | 0.00     | 0.00     | 0.00     | 0.00     | 0.00     | 0.00     | 0.00    | 0.00     | 0.00     | 0.00     | 0.00     | 0.00     |
| GT61       | 0.00     | 0.00     | 0.00     | 0.00     | 0.00     | 0.00     | 0.00     | 0.00    | 0.00     | 0.00     | 0.00     | 0.00     | 0.00     |
| GT3        | 0.21     | 0.21     | 0.38     | 0.22     | 0.47     | 0.38     | 0.24     | 0.33    | 0.20     | 0.13     | 0.20     | 0.40     | 0.48     |
| PL3        | 0.00     | 0.00     | 0.00     | 0.00     | 0.00     | 0.00     | 0.00     | 0.00    | 0.00     | 0.00     | 0.00     | 0.00     | 0.00     |
| GH108      | 0.04     | 0.00     | 0.07     | 0.03     | 0.04     | 0.02     | 0.05     | 0.01    | 0.02     | 0.12     | 0.02     | 0.04     | 0.04     |
| GT56       | 0.00     | 0.00     | 0.00     | 0.00     | 0.00     | 0.00     | 0.00     | 0.00    | 0.00     | 0.00     | 0.00     | 0.00     | 0.00     |
| PL11       | 0.12     | 0.21     | 0.24     | 0.30     | 0.30     | 0.33     | 0.16     | 0.18    | 0.17     | 0.13     | 0.18     | 0.11     | 0.18     |
| GH45       | 0.01     | 0.00     | 0.00     | 0.00     | 0.00     | 0.00     | 0.00     | 0.00    | 0.00     | 0.00     | 0.00     | 0.00     | 0.01     |
| GT34       | 0.00     | 0.02     | 0.00     | 0.00     | 0.00     | 0.00     | 0.00     | 0.00    | 0.00     | 0.00     | 0.00     | 0.00     | 0.00     |
| PL14       | 0.00     | 0.00     | 0.00     | 0.00     | 0.00     | 0.00     | 0.00     | 0.00    | 0.00     | 0.00     | 0.00     | 0.00     | 0.00     |
| GH19       | 0.00     | 0.04     | 0.00     | 0.02     | 0.02     | 0.00     | 0.00     | 0.01    | 0.00     | 0.00     | 0.00     | 0.00     | 0.00     |
| GH118      | 0.00     | 0.00     | 0.00     | 0.00     | 0.00     | 0.00     | 0.00     | 0.00    | 0.00     | 0.00     | 0.00     | 0.00     | 0.00     |
| GH82       | 0.00     | 0.00     | 0.00     | 0.00     | 0.00     | 0.00     | 0.00     | 0.00    | 0.00     | 0.00     | 0.00     | 0.00     | 0.00     |
| GH76       | 0.17     | 0.33     | 0.43     | 0.42     | 0.39     | 0.30     | 0.35     | 0.16    | 0.11     | 0.16     | 0.17     | 0.15     | 0.33     |
| GT4        | 2.04     | 2.66     | 3.15     | 3.75     | 2.94     | 2.92     | 2.62     | 2.33    | 1.98     | 2.49     | 2.47     | 1.86     | 2.41     |
| GT87       | 0.01     | 0.02     | 0.00     | 0.02     | 0.02     | 0.01     | 0.01     | 0.00    | 0.00     | 0.00     | 0.01     | 0.00     | 0.01     |
| GH24       | 0.13     | 0.23     | 0.18     | 0.12     | 0.12     | 0.18     | 0.22     | 0.15    | 0.15     | 0.10     | 0.12     | 0.13     | 0.18     |
| GH90       | 0.00     | 0.00     | 0.00     | 0.00     | 0.00     | 0.00     | 0.00     | 0.00    | 0.00     | 0.00     | 0.00     | 0.00     | 0.00     |
| GH57       | 0.19     | 0.12     | 0.28     | 0.20     | 0.29     | 0.23     | 0.29     | 0.18    | 0.12     | 0.16     | 0.17     | 0.18     | 0.21     |
| GH36       | 0.75     | 0.99     | 0.96     | 1.14     | 1.04     | 1.09     | 0.91     | 0.71    | 0.64     | 0.96     | 0.92     | 0.75     | 0.82     |
| GT46       | 0.00     | 0.00     | 0.00     | 0.00     | 0.00     | 0.00     | 0.00     | 0.00    | 0.00     | 0.00     | 0.00     | 0.00     | 0.00     |
| GH66       | 0.05     | 0.04     | 0.04     | 0.05     | 0.10     | 0.07     | 0.09     | 0.04    | 0.03     | 0.03     | 0.07     | 0.04     | 0.02     |



| CAZY_group | AM-AD-63 | AM-AD-64 | AM-AD-65 | AM-AD-66 | AM-AD-67 | AM-AD-68 | AM-AD-69 | AM-AD-7 | AM-AD-70 | AM-AD-71 | AM-AD-72 | AM-AD-73 | AM-AD-74 |
|------------|----------|----------|----------|----------|----------|----------|----------|---------|----------|----------|----------|----------|----------|
| GT76       | 0.00     | 0.00     | 0.00     | 0.00     | 0.00     | 0.00     | 0.00     | 0.00    | 0.00     | 0.00     | 0.00     | 0.00     | 0.00     |
| GT32       | 0.14     | 0.08     | 0.16     | 0.10     | 0.10     | 0.10     | 0.14     | 0.16    | 0.12     | 0.09     | 0.08     | 0.09     | 0.08     |
| GT47       | 0.09     | 0.08     | 0.07     | 0.12     | 0.07     | 0.09     | 0.09     | 0.05    | 0.10     | 0.08     | 0.05     | 0.07     | 0.06     |
| GH84       | 0.14     | 0.19     | 0.12     | 0.15     | 0.11     | 0.14     | 0.11     | 0.08    | 0.08     | 0.08     | 0.16     | 0.12     | 0.04     |
| GH83       | 0.00     | 0.00     | 0.00     | 0.00     | 0.00     | 0.00     | 0.00     | 0.00    | 0.00     | 0.00     | 0.00     | 0.00     | 0.00     |
| GT59       | 0.00     | 0.00     | 0.00     | 0.00     | 0.00     | 0.00     | 0.00     | 0.00    | 0.00     | 0.00     | 0.00     | 0.00     | 0.00     |
| GH34       | 0.00     | 0.00     | 0.00     | 0.00     | 0.00     | 0.00     | 0.00     | 0.00    | 0.00     | 0.00     | 0.00     | 0.00     | 0.00     |
| GT14       | 0.03     | 0.02     | 0.06     | 0.07     | 0.04     | 0.03     | 0.04     | 0.03    | 0.01     | 0.00     | 0.04     | 0.01     | 0.01     |
| GH47       | 0.00     | 0.02     | 0.00     | 0.00     | 0.00     | 0.00     | 0.00     | 0.00    | 0.01     | 0.00     | 0.00     | 0.00     | 0.00     |
| GH97       | 0.81     | 0.97     | 2.14     | 1.78     | 1.86     | 1.72     | 1.43     | 0.86    | 0.61     | 0.68     | 1.05     | 0.94     | 1.30     |
| GH50       | 0.05     | 0.14     | 0.13     | 0.12     | 0.13     | 0.13     | 0.13     | 0.07    | 0.08     | 0.03     | 0.00     | 0.07     | 0.08     |
| GT26       | 0.16     | 0.23     | 0.28     | 0.45     | 0.32     | 0.25     | 0.24     | 0.28    | 0.16     | 0.25     | 0.22     | 0.15     | 0.22     |
| GH18       | 0.60     | 0.89     | 0.77     | 1.21     | 0.84     | 0.83     | 0.75     | 0.73    | 0.42     | 0.87     | 0.63     | 0.53     | 0.62     |
| GH37       | 0.00     | 0.00     | 0.03     | 0.00     | 0.00     | 0.02     | 0.00     | 0.03    | 0.00     | 0.00     | 0.00     | 0.00     | 0.02     |
| PL13       | 0.05     | 0.06     | 0.07     | 0.12     | 0.08     | 0.08     | 0.05     | 0.04    | 0.02     | 0.05     | 0.06     | 0.08     | 0.07     |
| GH27       | 0.22     | 0.31     | 0.57     | 0.39     | 0.41     | 0.25     | 0.26     | 0.27    | 0.21     | 0.36     | 0.26     | 0.19     | 0.33     |
| GT54       | 0.00     | 0.00     | 0.00     | 0.00     | 0.00     | 0.00     | 0.00     | 0.00    | 0.00     | 0.00     | 0.00     | 0.00     | 0.00     |
| GT91       | 0.00     | 0.00     | 0.00     | 0.00     | 0.00     | 0.00     | 0.00     | 0.00    | 0.00     | 0.00     | 0.00     | 0.00     | 0.00     |
| GT72       | 0.00     | 0.00     | 0.00     | 0.00     | 0.00     | 0.00     | 0.00     | 0.00    | 0.00     | 0.00     | 0.00     | 0.00     | 0.00     |
| GH67       | 0.12     | 0.06     | 0.12     | 0.24     | 0.13     | 0.09     | 0.06     | 0.09    | 0.05     | 0.05     | 0.10     | 0.06     | 0.15     |
| GH12       | 0.00     | 0.00     | 0.00     | 0.00     | 0.00     | 0.00     | 0.00     | 0.00    | 0.00     | 0.00     | 0.00     | 0.00     | 0.00     |
| GH91       | 0.01     | 0.00     | 0.07     | 0.17     | 0.03     | 0.04     | 0.05     | 0.02    | 0.02     | 0.05     | 0.03     | 0.02     | 0.06     |
| GT69       | 0.00     | 0.00     | 0.00     | 0.00     | 0.00     | 0.00     | 0.00     | 0.00    | 0.00     | 0.00     | 0.00     | 0.00     | 0.00     |
| GH106      | 0.21     | 0.25     | 0.56     | 0.76     | 0.42     | 0.92     | 0.29     | 0.30    | 0.30     | 0.23     | 0.29     | 0.29     | 0.46     |
| GT62       | 0.00     | 0.00     | 0.00     | 0.00     | 0.00     | 0.00     | 0.00     | 0.00    | 0.00     | 0.00     | 0.00     | 0.00     | 0.00     |
| GH17       | 0.00     | 0.00     | 0.00     | 0.00     | 0.00     | 0.00     | 0.00     | 0.00    | 0.01     | 0.00     | 0.00     | 0.00     | 0.00     |
| GH88       | 0.36     | 0.54     | 0.74     | 0.81     | 0.65     | 0.57     | 0.33     | 0.28    | 0.20     | 0.31     | 0.50     | 0.36     | 0.56     |
| CE5        | 0.00     | 0.00     | 0.00     | 0.00     | 0.00     | 0.00     | 0.00     | 0.00    | 0.00     | 0.00     | 0.00     | 0.00     | 0.00     |
| GT8        | 0.11     | 0.14     | 0.08     | 0.34     | 0.14     | 0.05     | 0.15     | 0.20    | 0.08     | 0.16     | 0.05     | 0.10     | 0.15     |
| GT50       | 0.00     | 0.00     | 0.00     | 0.00     | 0.00     | 0.00     | 0.00     | 0.00    | 0.00     | 0.00     | 0.00     | 0.00     | 0.00     |
| GT20       | 0.06     | 0.06     | 0.16     | 0.18     | 0.15     | 0.09     | 0.11     | 0.14    | 0.08     | 0.08     | 0.06     | 0.12     | 0.14     |
| PL9        | 0.04     | 0.04     | 0.17     | 0.20     | 0.06     | 0.07     | 0.15     | 0.18    | 0.05     | 0.20     | 0.10     | 0.09     | 0.05     |
| GH55       | 0.03     | 0.02     | 0.05     | 0.05     | 0.04     | 0.05     | 0.03     | 0.03    | 0.03     | 0.07     | 0.03     | 0.02     | 0.01     |
| GH64       | 0.00     | 0.00     | 0.00     | 0.00     | 0.00     | 0.00     | 0.00     | 0.01    | 0.00     | 0.00     | 0.00     | 0.01     | 0.00     |
| GH127      | 0.27     | 0.37     | 0.52     | 0.52     | 0.47     | 0.46     | 0.52     | 0.41    | 0.30     | 0.49     | 0.35     | 0.25     | 0.41     |
| GH103      | 0.00     | 0.00     | 0.01     | 0.02     | 0.01     | 0.00     | 0.00     | 0.00    | 0.00     | 0.00     | 0.00     | 0.00     | 0.00     |
| GH3        | 2.75     | 2.97     | 4.40     | 5.04     | 4.53     | 3.57     | 3.31     | 2.79    | 2.09     | 3.99     | 3.00     | 2.39     | 2.68     |
| GT45       | 0.00     | 0.00     | 0.00     | 0.00     | 0.00     | 0.00     | 0.00     | 0.00    | 0.00     | 0.00     | 0.00     | 0.00     | 0.00     |
| GT74       | 0.00     | 0.00     | 0.00     | 0.00     | 0.00     | 0.00     | 0.00     | 0.00    | 0.00     | 0.00     | 0.00     | 0.00     | 0.00     |
| GT90       | 0.00     | 0.00     | 0.01     | 0.02     | 0.00     | 0.00     | 0.00     | 0.00    | 0.00     | 0.00     | 0.00     | 0.00     | 0.00     |
| GH116      | 0.09     | 0.00     | 0.18     | 0.18     | 0.13     | 0.14     | 0.10     | 0.06    | 0.03     | 0.08     | 0.06     | 0.04     | 0.09     |
| GH31       | 1.12     | 1.01     | 1.49     | 1.87     | 1.38     | 1.26     | 1.17     | 0.90    | 0.91     | 1.25     | 1.13     | 0.69     | 0.95     |
| GT12       | 0.00     | 0.00     | 0.00     | 0.00     | 0.00     | 0.00     | 0.00     | 0.00    | 0.00     | 0.00     | 0.00     | 0.00     | 0.00     |
| CE1        | 0.37     | 0.33     | 0.55     | 0.79     | 0.54     | 0.57     | 0.48     | 0.41    | 0.37     | 0.51     | 0.45     | 0.34     | 0.41     |
| GH121      | 0.00     | 0.00     | 0.00     | 0.00     | 0.00     | 0.00     | 0.00     | 0.00    | 0.00     | 0.00     | 0.00     | 0.00     | 0.00     |
| GH79       | 0.00     | 0.00     | 0.00     | 0.00     | 0.00     | 0.00     | 0.00     | 0.00    | 0.01     | 0.01     | 0.00     | 0.00     | 0.00     |
| GT73       | 0.00     | 0.00     | 0.00     | 0.00     | 0.00     | 0.00     | 0.00     | 0.00    | 0.00     | 0.00     | 0.00     | 0.00     | 0.00     |
| GH77       | 0.57     | 0.54     | 0.70     | 0.87     | 0.73     | 0.73     | 0.53     | 0.62    | 0.62     | 0.74     | 0.56     | 0.59     | 0.40     |
| PL17       | 0.00     | 0.00     | 0.02     | 0.02     | 0.00     | 0.00     | 0.00     | 0.00    | 0.00     | 0.00     | 0.00     | 0.00     | 0.00     |
| PL8        | 0.28     | 0.21     | 0.60     | 0.57     | 0.56     | 0.43     | 0.52     | 0.15    | 0.12     | 0.28     | 0.25     | 0.26     | 0.47     |

| CAZY_group | AM-AD-63 | AM-AD-64 | AM-AD-65 | AM-AD-66 | AM-AD-67 | AM-AD-68 | AM-AD-69 | AM-AD-7 | AM-AD-70 | AM-AD-71 | AM-AD-72 | AM-AD-73 | AM-AD-74 |      |
|------------|----------|----------|----------|----------|----------|----------|----------|---------|----------|----------|----------|----------|----------|------|
| CE9        |          | 0.34     | 0.39     | 0.48     | 0.71     | 0.38     | 0.37     | 0.30    | 0.32     | 0.27     | 0.40     | 0.34     | 0.27     | 0.28 |
| CE15       |          | 0.04     | 0.00     | 0.03     | 0.02     | 0.04     | 0.05     | 0.02    | 0.01     | 0.00     | 0.02     | 0.03     | 0.05     | 0.02 |
| GT79       |          | 0.00     | 0.00     | 0.00     | 0.00     | 0.00     | 0.00     | 0.00    | 0.00     | 0.00     | 0.00     | 0.00     | 0.00     | 0.00 |
| GT10       |          | 0.00     | 0.02     | 0.00     | 0.00     | 0.00     | 0.00     | 0.01    | 0.00     | 0.00     | 0.00     | 0.00     | 0.01     | 0.02 |
| GH119      |          | 0.00     | 0.00     | 0.00     | 0.00     | 0.00     | 0.00     | 0.00    | 0.00     | 0.00     | 0.00     | 0.00     | 0.00     | 0.00 |
| GH16       |          | 0.18     | 0.39     | 0.38     | 0.44     | 0.32     | 0.26     | 0.26    | 0.23     | 0.12     | 0.26     | 0.21     | 0.10     | 0.34 |
| GH43       |          | 1.98     | 2.17     | 3.86     | 4.76     | 3.99     | 3.36     | 3.23    | 2.10     | 1.76     | 2.36     | 2.38     | 1.64     | 2.24 |
| GH51       |          | 0.43     | 0.68     | 0.92     | 1.18     | 0.82     | 0.72     | 0.73    | 0.66     | 0.47     | 0.69     | 0.62     | 0.47     | 0.69 |
| GT35       |          | 0.98     | 1.14     | 0.79     | 1.29     | 1.02     | 0.90     | 0.90    | 1.27     | 0.82     | 1.55     | 1.07     | 0.81     | 0.55 |
| GT25       |          | 0.00     | 0.00     | 0.00     | 0.03     | 0.00     | 0.00     | 0.00    | 0.00     | 0.00     | 0.00     | 0.00     | 0.00     | 0.02 |
| GT2        |          | 4.67     | 4.86     | 6.48     | 7.63     | 6.30     | 5.55     | 5.46    | 5.26     | 3.96     | 5.76     | 4.91     | 4.07     | 4.82 |
| GT51       |          | 0.91     | 1.22     | 1.49     | 1.29     | 1.38     | 1.34     | 1.13    | 1.26     | 0.81     | 1.44     | 1.08     | 0.91     | 1.46 |
| GH107      |          | 0.00     | 0.00     | 0.00     | 0.00     | 0.00     | 0.00     | 0.00    | 0.00     | 0.00     | 0.00     | 0.00     | 0.00     | 0.00 |
| GH7        |          | 0.00     | 0.00     | 0.00     | 0.00     | 0.00     | 0.00     | 0.00    | 0.00     | 0.00     | 0.00     | 0.00     | 0.00     | 0.00 |
| GT7        |          | 0.00     | 0.00     | 0.00     | 0.00     | 0.00     | 0.00     | 0.00    | 0.00     | 0.00     | 0.00     | 0.00     | 0.00     | 0.00 |
| GT36       |          | 0.00     | 0.00     | 0.00     | 0.00     | 0.00     | 0.00     | 0.00    | 0.00     | 0.00     | 0.00     | 0.00     | 0.00     | 0.00 |
| PL7        |          | 0.00     | 0.00     | 0.00     | 0.00     | 0.00     | 0.00     | 0.00    | 0.00     | 0.00     | 0.00     | 0.00     | 0.00     | 0.00 |
| GH110      |          | 0.15     | 0.16     | 0.14     | 0.25     | 0.15     | 0.10     | 0.15    | 0.09     | 0.06     | 0.08     | 0.13     | 0.06     | 0.29 |
| GT21       |          | 0.00     | 0.00     | 0.00     | 0.00     | 0.00     | 0.00     | 0.00    | 0.00     | 0.00     | 0.00     | 0.00     | 0.00     | 0.00 |
| GH62       |          | 0.00     | 0.00     | 0.00     | 0.00     | 0.00     | 0.01     | 0.00    | 0.00     | 0.00     | 0.00     | 0.00     | 0.00     | 0.00 |
| GH125      |          | 0.18     | 0.23     | 0.38     | 0.22     | 0.34     | 0.34     | 0.21    | 0.17     | 0.09     | 0.20     | 0.23     | 0.18     | 0.27 |
| GH117      |          | 0.08     | 0.14     | 0.21     | 0.17     | 0.16     | 0.15     | 0.10    | 0.10     | 0.06     | 0.12     | 0.11     | 0.09     | 0.16 |
| GH68       |          | 0.00     | 0.00     | 0.00     | 0.00     | 0.00     | 0.00     | 0.00    | 0.00     | 0.00     | 0.00     | 0.00     | 0.00     | 0.00 |
| GH85       |          | 0.01     | 0.00     | 0.02     | 0.03     | 0.01     | 0.04     | 0.00    | 0.09     | 0.01     | 0.03     | 0.05     | 0.01     | 0.01 |
| GH92       |          | 1.81     | 2.31     | 3.72     | 2.96     | 3.47     | 3.10     | 3.05    | 1.74     | 1.55     | 1.45     | 2.05     | 1.75     | 3.42 |
| GH40       |          | 0.00     | 0.00     | 0.00     | 0.00     | 0.00     | 0.00     | 0.00    | 0.00     | 0.00     | 0.00     | 0.00     | 0.00     | 0.00 |
| GT49       |          | 0.00     | 0.00     | 0.00     | 0.00     | 0.00     | 0.00     | 0.00    | 0.00     | 0.00     | 0.00     | 0.00     | 0.00     | 0.00 |
| GH112      |          | 0.16     | 0.14     | 0.10     | 0.42     | 0.11     | 0.09     | 0.15    | 0.12     | 0.16     | 0.35     | 0.15     | 0.12     | 0.05 |
| GT67       |          | 0.00     | 0.00     | 0.00     | 0.00     | 0.00     | 0.00     | 0.00    | 0.00     | 0.00     | 0.00     | 0.00     | 0.00     | 0.00 |
| CE8        |          | 0.15     | 0.25     | 0.34     | 0.57     | 0.32     | 0.20     | 0.34    | 0.24     | 0.13     | 0.30     | 0.22     | 0.26     | 0.15 |
| GT86       |          | 0.00     | 0.00     | 0.00     | 0.00     | 0.00     | 0.00     | 0.00    | 0.00     | 0.00     | 0.00     | 0.00     | 0.00     | 0.00 |
| GH101      |          | 0.00     | 0.02     | 0.00     | 0.00     | 0.00     | 0.02     | 0.00    | 0.00     | 0.02     | 0.03     | 0.00     | 0.01     | 0.00 |
| GH81       |          | 0.01     | 0.00     | 0.00     | 0.00     | 0.01     | 0.00     | 0.00    | 0.05     | 0.02     | 0.02     | 0.00     | 0.01     | 0.00 |
| GT93       |          | 0.00     | 0.00     | 0.00     | 0.00     | 0.00     | 0.00     | 0.00    | 0.00     | 0.00     | 0.00     | 0.00     | 0.00     | 0.00 |
| GT63       |          | 0.00     | 0.00     | 0.00     | 0.00     | 0.00     | 0.00     | 0.00    | 0.00     | 0.00     | 0.00     | 0.00     | 0.00     | 0.00 |
| CE11       |          | 0.26     | 0.25     | 0.45     | 0.22     | 0.39     | 0.45     | 0.31    | 0.28     | 0.24     | 0.30     | 0.28     | 0.27     | 0.40 |
| GT19       |          | 0.15     | 0.06     | 0.26     | 0.17     | 0.20     | 0.27     | 0.21    | 0.20     | 0.16     | 0.15     | 0.19     | 0.18     | 0.28 |
| GT33       |          | 0.00     | 0.00     | 0.00     | 0.00     | 0.00     | 0.00     | 0.00    | 0.00     | 0.00     | 0.00     | 0.00     | 0.00     | 0.00 |
| GH21       |          | 0.00     | 0.00     | 0.00     | 0.00     | 0.00     | 0.00     | 0.00    | 0.00     | 0.00     | 0.00     | 0.00     | 0.00     | 0.00 |
| GT68       |          | 0.00     | 0.00     | 0.00     | 0.00     | 0.00     | 0.00     | 0.00    | 0.00     | 0.00     | 0.00     | 0.00     | 0.00     | 0.00 |
| GH89       |          | 0.22     | 0.43     | 0.45     | 0.45     | 0.29     | 0.31     | 0.33    | 0.21     | 0.20     | 0.15     | 0.22     | 0.25     | 0.34 |
| GT82       |          | 0.01     | 0.00     | 0.00     | 0.00     | 0.00     | 0.00     | 0.00    | 0.00     | 0.00     | 0.00     | 0.01     | 0.01     | 0.00 |
| GH30       |          | 0.19     | 0.12     | 0.45     | 0.29     | 0.42     | 0.37     | 0.32    | 0.20     | 0.14     | 0.26     | 0.34     | 0.24     | 0.26 |
| GH20       |          | 1.14     | 1.84     | 2.80     | 2.22     | 2.17     | 2.06     | 1.46    | 1.40     | 0.91     | 1.45     | 1.16     | 1.17     | 2.48 |
| GH52       |          | 0.00     | 0.00     | 0.00     | 0.00     | 0.00     | 0.00     | 0.00    | 0.00     | 0.00     | 0.00     | 0.00     | 0.00     | 0.00 |
| GT84       |          | 0.12     | 0.00     | 0.04     | 0.02     | 0.06     | 0.00     | 0.08    | 0.15     | 0.00     | 0.00     | 0.02     | 0.02     | 0.00 |
| GT15       |          | 0.00     | 0.00     | 0.00     | 0.00     | 0.00     | 0.00     | 0.00    | 0.00     | 0.00     | 0.00     | 0.00     | 0.00     | 0.00 |
| GH93       |          | 0.00     | 0.00     | 0.01     | 0.05     | 0.01     | 0.04     | 0.02    | 0.00     | 0.00     | 0.02     | 0.01     | 0.00     | 0.00 |
| PL16       |          | 0.00     | 0.00     | 0.00     | 0.00     | 0.00     | 0.00     | 0.00    | 0.00     | 0.00     | 0.00     | 0.00     | 0.00     | 0.00 |
| GH26       |          | 0.12     | 0.10     | 0.19     | 0.22     | 0.27     | 0.21     | 0.16    | 0.13     | 0.02     | 0.13     | 0.20     | 0.09     | 0.13 |





| CAZY_group | AM-AD-63 | AM-AD-64 | AM-AD-65 | AM-AD-66 | AM-AD-67 | AM-AD-68 | AM-AD-69 | AM-AD-7 | AM-AD-70 | AM-AD-71 | AM-AD-72 | AM-AD-73 | AM-AD-74 |
|------------|----------|----------|----------|----------|----------|----------|----------|---------|----------|----------|----------|----------|----------|
| GT52       |          | 0.00     | 0.00     | 0.00     | 0.00     | 0.00     | 0.00     | 0.00    | 0.00     | 0.00     | 0.00     | 0.00     | 0.00     |
| GT64       |          | 0.00     | 0.00     | 0.00     | 0.00     | 0.00     | 0.00     | 0.00    | 0.00     | 0.00     | 0.00     | 0.00     | 0.00     |
| GT85       |          | 0.00     | 0.00     | 0.00     | 0.00     | 0.00     | 0.00     | 0.00    | 0.00     | 0.00     | 0.00     | 0.00     | 0.00     |
| GT16       |          | 0.00     | 0.00     | 0.00     | 0.00     | 0.00     | 0.00     | 0.00    | 0.00     | 0.00     | 0.00     | 0.00     | 0.00     |
| GH56       |          | 0.00     | 0.00     | 0.00     | 0.00     | 0.00     | 0.00     | 0.00    | 0.00     | 0.00     | 0.00     | 0.00     | 0.00     |
| GT60       |          | 0.00     | 0.00     | 0.00     | 0.00     | 0.00     | 0.00     | 0.00    | 0.00     | 0.00     | 0.00     | 0.00     | 0.00     |
| GH41       |          | 0.00     | 0.00     | 0.00     | 0.00     | 0.00     | 0.00     | 0.00    | 0.00     | 0.00     | 0.00     | 0.00     | 0.00     |
| CE7        |          | 0.12     | 0.08     | 0.17     | 0.20     | 0.17     | 0.27     | 0.13    | 0.10     | 0.11     | 0.08     | 0.15     | 0.11     |
| GH39       |          | 0.06     | 0.02     | 0.13     | 0.17     | 0.08     | 0.12     | 0.01    | 0.06     | 0.01     | 0.21     | 0.04     | 0.06     |
| GT30       |          | 0.26     | 0.33     | 0.55     | 0.32     | 0.41     | 0.50     | 0.36    | 0.26     | 0.29     | 0.38     | 0.28     | 0.35     |
| PL15       |          | 0.18     | 0.10     | 0.24     | 0.25     | 0.18     | 0.19     | 0.13    | 0.17     | 0.16     | 0.10     | 0.08     | 0.09     |
| GH102      |          | 0.01     | 0.00     | 0.00     | 0.00     | 0.00     | 0.01     | 0.00    | 0.01     | 0.01     | 0.00     | 0.02     | 0.00     |

| CAZY_group | AM-AD-75 | AM-AD-76 | AM-AD-77 | AM-AD-78 | AM-AD-79 | AM-AD-8 | AM-AD-80 | AM-AD-81 | AM-AD-82 | AM-AD-83 | AM-AD-84 | AM-AD-85 | AM-AD-86 |      |
|------------|----------|----------|----------|----------|----------|---------|----------|----------|----------|----------|----------|----------|----------|------|
| GH29       | 0.61     | 0.62     | 0.63     | 0.63     | 0.63     | 1.13    | 0.92     | 0.52     | 0.54     | 0.34     | 0.74     | 0.70     | 0.56     | 0.82 |
| PL4        | 0.00     | 0.00     | 0.00     | 0.00     | 0.00     | 0.01    | 0.00     | 0.00     | 0.00     | 0.00     | 0.00     | 0.00     | 0.00     | 0.00 |
| GH23       | 1.20     | 1.25     | 1.01     | 1.06     | 1.08     | 1.08    | 1.35     | 1.15     | 1.32     | 1.72     | 1.10     | 1.20     | 0.97     | 1.51 |
| CE6        | 0.02     | 0.04     | 0.02     | 0.02     | 0.06     | 0.09    | 0.09     | 0.00     | 0.03     | 0.00     | 0.04     | 0.03     | 0.11     | 0.05 |
| GH72       | 0.16     | 0.15     | 0.12     | 0.15     | 0.15     | 0.12    | 0.14     | 0.17     | 0.18     | 0.11     | 0.10     | 0.10     | 0.06     | 0.13 |
| GH114      | 0.00     | 0.00     | 0.00     | 0.00     | 0.00     | 0.00    | 0.00     | 0.00     | 0.00     | 0.00     | 0.00     | 0.00     | 0.00     | 0.00 |
| GH78       | 0.87     | 0.92     | 0.93     | 0.70     | 1.20     | 1.11    | 0.77     | 0.78     | 0.29     | 0.80     | 0.80     | 1.06     | 0.55     |      |
| PL19       | 0.00     | 0.00     | 0.00     | 0.00     | 0.00     | 0.00    | 0.00     | 0.00     | 0.00     | 0.00     | 0.00     | 0.00     | 0.00     | 0.00 |
| GT27       | 0.00     | 0.00     | 0.00     | 0.01     | 0.00     | 0.00    | 0.00     | 0.00     | 0.00     | 0.00     | 0.00     | 0.00     | 0.00     | 0.00 |
| GH5        | 0.34     | 0.58     | 0.57     | 0.32     | 0.60     | 0.18    | 0.39     | 0.35     | 0.26     | 0.30     | 0.39     | 0.32     | 0.30     |      |
| GT40       | 0.00     | 0.00     | 0.00     | 0.00     | 0.00     | 0.00    | 0.00     | 0.00     | 0.00     | 0.00     | 0.00     | 0.00     | 0.00     | 0.00 |
| CE13       | 0.00     | 0.00     | 0.00     | 0.00     | 0.00     | 0.00    | 0.00     | 0.01     | 0.00     | 0.00     | 0.00     | 0.00     | 0.00     | 0.00 |
| GT37       | 0.00     | 0.00     | 0.00     | 0.00     | 0.00     | 0.00    | 0.00     | 0.00     | 0.00     | 0.00     | 0.00     | 0.00     | 0.00     | 0.00 |
| GH33       | 0.17     | 0.24     | 0.22     | 0.19     | 0.33     | 0.22    | 0.14     | 0.25     | 0.09     | 0.19     | 0.28     | 0.24     | 0.33     |      |
| GT65       | 0.00     | 0.00     | 0.00     | 0.00     | 0.00     | 0.00    | 0.00     | 0.00     | 0.00     | 0.00     | 0.00     | 0.00     | 0.00     | 0.00 |
| GH86       | 0.00     | 0.00     | 0.02     | 0.00     | 0.03     | 0.00    | 0.00     | 0.01     | 0.00     | 0.00     | 0.00     | 0.00     | 0.00     | 0.00 |
| GH123      | 0.09     | 0.09     | 0.13     | 0.12     | 0.14     | 0.15    | 0.12     | 0.08     | 0.02     | 0.13     | 0.14     | 0.09     | 0.13     |      |
| GH96       | 0.00     | 0.00     | 0.00     | 0.00     | 0.00     | 0.00    | 0.00     | 0.00     | 0.00     | 0.00     | 0.00     | 0.00     | 0.00     | 0.00 |
| GH14       | 0.00     | 0.00     | 0.00     | 0.00     | 0.00     | 0.00    | 0.00     | 0.00     | 0.00     | 0.00     | 0.00     | 0.00     | 0.00     | 0.00 |
| CE3        | 0.00     | 0.01     | 0.00     | 0.00     | 0.00     | 0.00    | 0.00     | 0.00     | 0.00     | 0.00     | 0.00     | 0.00     | 0.00     | 0.00 |
| PL10       | 0.09     | 0.07     | 0.10     | 0.11     | 0.11     | 0.34    | 0.04     | 0.03     | 0.01     | 0.09     | 0.08     | 0.13     | 0.13     |      |
| GT48       | 0.00     | 0.00     | 0.00     | 0.00     | 0.00     | 0.00    | 0.00     | 0.00     | 0.00     | 0.00     | 0.00     | 0.00     | 0.00     | 0.00 |
| PL6        | 0.00     | 0.00     | 0.01     | 0.00     | 0.00     | 0.00    | 0.00     | 0.00     | 0.00     | 0.00     | 0.00     | 0.00     | 0.00     | 0.00 |
| GT83       | 0.08     | 0.07     | 0.05     | 0.12     | 0.08     | 0.22    | 0.08     | 0.09     | 0.03     | 0.09     | 0.17     | 0.06     | 0.13     |      |
| GH126      | 0.00     | 0.00     | 0.00     | 0.00     | 0.00     | 0.00    | 0.00     | 0.00     | 0.00     | 0.00     | 0.00     | 0.00     | 0.00     | 0.00 |
| GH9        | 0.10     | 0.35     | 0.14     | 0.14     | 0.23     | 0.03    | 0.09     | 0.19     | 0.10     | 0.11     | 0.08     | 0.02     | 0.13     |      |
| GH75       | 0.00     | 0.00     | 0.00     | 0.00     | 0.00     | 0.00    | 0.00     | 0.00     | 0.00     | 0.00     | 0.00     | 0.00     | 0.00     | 0.00 |
| GT71       | 0.00     | 0.00     | 0.00     | 0.00     | 0.00     | 0.00    | 0.00     | 0.00     | 0.00     | 0.00     | 0.00     | 0.00     | 0.00     | 0.00 |
| GH46       | 0.00     | 0.00     | 0.00     | 0.00     | 0.00     | 0.00    | 0.00     | 0.01     | 0.00     | 0.00     | 0.00     | 0.00     | 0.00     | 0.00 |
| GT61       | 0.01     | 0.00     | 0.00     | 0.00     | 0.00     | 0.00    | 0.00     | 0.00     | 0.00     | 0.00     | 0.00     | 0.00     | 0.00     | 0.00 |
| GT3        | 0.15     | 0.08     | 0.28     | 0.14     | 0.17     | 0.03    | 0.22     | 0.11     | 0.11     | 0.17     | 0.26     | 0.06     | 0.22     |      |
| PL3        | 0.00     | 0.00     | 0.00     | 0.00     | 0.00     | 0.00    | 0.00     | 0.00     | 0.00     | 0.00     | 0.00     | 0.00     | 0.00     | 0.00 |
| GH108      | 0.02     | 0.03     | 0.03     | 0.04     | 0.03     | 0.00    | 0.03     | 0.02     | 0.01     | 0.06     | 0.03     | 0.04     | 0.03     |      |
| GT56       | 0.01     | 0.01     | 0.00     | 0.00     | 0.00     | 0.09    | 0.00     | 0.00     | 0.02     | 0.00     | 0.00     | 0.00     | 0.00     | 0.00 |
| PL11       | 0.14     | 0.20     | 0.23     | 0.11     | 0.27     | 0.31    | 0.09     | 0.12     | 0.02     | 0.08     | 0.19     | 0.24     | 0.18     |      |
| GH45       | 0.00     | 0.01     | 0.00     | 0.01     | 0.00     | 0.00    | 0.00     | 0.01     | 0.00     | 0.00     | 0.00     | 0.00     | 0.00     | 0.00 |
| GT34       | 0.01     | 0.01     | 0.00     | 0.01     | 0.00     | 0.00    | 0.00     | 0.00     | 0.00     | 0.00     | 0.00     | 0.00     | 0.00     | 0.00 |
| PL14       | 0.00     | 0.00     | 0.00     | 0.00     | 0.00     | 0.00    | 0.00     | 0.00     | 0.00     | 0.00     | 0.00     | 0.00     | 0.00     | 0.00 |
| GH19       | 0.02     | 0.01     | 0.01     | 0.01     | 0.02     | 0.09    | 0.01     | 0.02     | 0.01     | 0.01     | 0.00     | 0.00     | 0.00     | 0.00 |
| GH118      | 0.00     | 0.00     | 0.00     | 0.00     | 0.00     | 0.00    | 0.00     | 0.00     | 0.00     | 0.00     | 0.00     | 0.00     | 0.00     | 0.00 |
| GH82       | 0.00     | 0.00     | 0.00     | 0.00     | 0.00     | 0.00    | 0.00     | 0.00     | 0.00     | 0.00     | 0.00     | 0.00     | 0.00     | 0.00 |
| GH76       | 0.13     | 0.15     | 0.21     | 0.19     | 0.42     | 0.25    | 0.09     | 0.21     | 0.09     | 0.15     | 0.20     | 0.37     | 0.08     |      |
| GT4        | 2.15     | 1.89     | 1.96     | 1.96     | 2.22     | 1.78    | 1.71     | 1.93     | 1.48     | 1.91     | 1.86     | 1.94     | 2.30     |      |
| GT87       | 0.00     | 0.00     | 0.00     | 0.01     | 0.01     | 0.00    | 0.01     | 0.00     | 0.01     | 0.01     | 0.01     | 0.00     | 0.02     |      |
| GH24       | 0.14     | 0.22     | 0.10     | 0.09     | 0.22     | 0.28    | 0.10     | 0.12     | 0.08     | 0.11     | 0.16     | 0.13     | 0.17     |      |
| GH90       | 0.01     | 0.00     | 0.00     | 0.00     | 0.00     | 0.00    | 0.00     | 0.00     | 0.00     | 0.00     | 0.00     | 0.00     | 0.00     | 0.00 |
| GH57       | 0.07     | 0.07     | 0.15     | 0.15     | 0.15     | 0.15    | 0.11     | 0.08     | 0.06     | 0.11     | 0.18     | 0.09     | 0.15     |      |
| GH36       | 0.97     | 0.94     | 1.00     | 0.71     | 1.01     | 0.95    | 0.70     | 0.66     | 0.57     | 0.69     | 0.76     | 0.80     | 0.88     |      |
| GT46       | 0.00     | 0.00     | 0.00     | 0.00     | 0.00     | 0.00    | 0.00     | 0.00     | 0.00     | 0.00     | 0.00     | 0.00     | 0.00     | 0.00 |
| GH66       | 0.04     | 0.03     | 0.02     | 0.02     | 0.09     | 0.06    | 0.03     | 0.07     | 0.00     | 0.03     | 0.02     | 0.09     | 0.05     |      |



| CAZY_group | AM-AD-75 | AM-AD-76 | AM-AD-77 | AM-AD-78 | AM-AD-79 | AM-AD-8 | AM-AD-80 | AM-AD-81 | AM-AD-82 | AM-AD-83 | AM-AD-84 | AM-AD-85 | AM-AD-86 |
|------------|----------|----------|----------|----------|----------|---------|----------|----------|----------|----------|----------|----------|----------|
| GT76       | 0.00     | 0.00     | 0.01     | 0.00     | 0.00     | 0.00    | 0.00     | 0.00     | 0.00     | 0.00     | 0.00     | 0.00     | 0.00     |
| GT32       | 0.05     | 0.10     | 0.07     | 0.09     | 0.08     | 0.08    | 0.03     | 0.07     | 0.05     | 0.07     | 0.03     | 0.03     | 0.06     |
| GT47       | 0.08     | 0.08     | 0.07     | 0.07     | 0.08     | 0.08    | 0.06     | 0.10     | 0.07     | 0.15     | 0.09     | 0.06     | 0.04     |
| GH84       | 0.13     | 0.07     | 0.10     | 0.14     | 0.14     | 0.18    | 0.06     | 0.15     | 0.15     | 0.00     | 0.12     | 0.07     | 0.19     |
| GH83       | 0.00     | 0.00     | 0.00     | 0.00     | 0.00     | 0.00    | 0.00     | 0.00     | 0.00     | 0.00     | 0.00     | 0.00     | 0.00     |
| GT59       | 0.00     | 0.00     | 0.00     | 0.00     | 0.00     | 0.00    | 0.00     | 0.00     | 0.00     | 0.00     | 0.00     | 0.00     | 0.00     |
| GH34       | 0.00     | 0.00     | 0.00     | 0.00     | 0.00     | 0.00    | 0.00     | 0.00     | 0.00     | 0.00     | 0.00     | 0.00     | 0.00     |
| GT14       | 0.02     | 0.03     | 0.02     | 0.03     | 0.09     | 0.00    | 0.03     | 0.03     | 0.03     | 0.00     | 0.01     | 0.03     | 0.02     |
| GH47       | 0.00     | 0.00     | 0.00     | 0.02     | 0.00     | 0.00    | 0.00     | 0.00     | 0.00     | 0.00     | 0.00     | 0.01     | 0.00     |
| GH97       | 0.70     | 0.49     | 0.87     | 0.68     | 1.42     | 0.98    | 0.39     | 0.80     | 0.32     | 0.71     | 0.78     | 0.97     | 1.07     |
| GH50       | 0.06     | 0.04     | 0.07     | 0.03     | 0.09     | 0.09    | 0.02     | 0.02     | 0.02     | 0.00     | 0.07     | 0.09     | 0.19     |
| GT26       | 0.22     | 0.29     | 0.21     | 0.17     | 0.18     | 0.12    | 0.17     | 0.27     | 0.15     | 0.20     | 0.16     | 0.11     | 0.15     |
| GH18       | 0.61     | 0.61     | 0.59     | 0.51     | 0.91     | 0.83    | 0.57     | 0.71     | 0.54     | 0.45     | 0.47     | 0.95     | 0.77     |
| GH37       | 0.02     | 0.02     | 0.03     | 0.02     | 0.00     | 0.09    | 0.01     | 0.00     | 0.00     | 0.01     | 0.00     | 0.00     | 0.00     |
| PL13       | 0.03     | 0.02     | 0.05     | 0.04     | 0.05     | 0.06    | 0.02     | 0.03     | 0.01     | 0.01     | 0.03     | 0.09     | 0.00     |
| GH27       | 0.21     | 0.23     | 0.26     | 0.23     | 0.28     | 0.18    | 0.24     | 0.25     | 0.12     | 0.26     | 0.22     | 0.26     | 0.22     |
| GT54       | 0.00     | 0.00     | 0.00     | 0.00     | 0.00     | 0.00    | 0.00     | 0.00     | 0.00     | 0.00     | 0.00     | 0.00     | 0.00     |
| GT91       | 0.00     | 0.00     | 0.00     | 0.00     | 0.00     | 0.00    | 0.00     | 0.00     | 0.00     | 0.00     | 0.00     | 0.00     | 0.00     |
| GT72       | 0.00     | 0.00     | 0.00     | 0.00     | 0.00     | 0.00    | 0.00     | 0.00     | 0.00     | 0.00     | 0.00     | 0.00     | 0.00     |
| GH67       | 0.07     | 0.10     | 0.05     | 0.08     | 0.09     | 0.18    | 0.04     | 0.03     | 0.01     | 0.09     | 0.10     | 0.06     | 0.05     |
| GH12       | 0.00     | 0.00     | 0.00     | 0.00     | 0.00     | 0.00    | 0.00     | 0.00     | 0.00     | 0.00     | 0.00     | 0.00     | 0.00     |
| GH91       | 0.03     | 0.01     | 0.01     | 0.02     | 0.06     | 0.03    | 0.01     | 0.03     | 0.00     | 0.08     | 0.03     | 0.04     | 0.05     |
| GT69       | 0.00     | 0.00     | 0.00     | 0.00     | 0.00     | 0.00    | 0.00     | 0.00     | 0.00     | 0.00     | 0.00     | 0.00     | 0.00     |
| GH106      | 0.18     | 0.27     | 0.26     | 0.18     | 0.36     | 0.34    | 0.16     | 0.24     | 0.03     | 0.20     | 0.30     | 0.43     | 0.12     |
| GT62       | 0.00     | 0.00     | 0.00     | 0.00     | 0.00     | 0.00    | 0.00     | 0.00     | 0.00     | 0.00     | 0.00     | 0.00     | 0.00     |
| GH17       | 0.01     | 0.00     | 0.00     | 0.02     | 0.00     | 0.00    | 0.01     | 0.00     | 0.00     | 0.00     | 0.00     | 0.00     | 0.00     |
| GH88       | 0.33     | 0.39     | 0.36     | 0.38     | 0.56     | 0.37    | 0.20     | 0.21     | 0.10     | 0.30     | 0.39     | 0.50     | 0.53     |
| CE5        | 0.00     | 0.00     | 0.00     | 0.00     | 0.00     | 0.00    | 0.00     | 0.00     | 0.00     | 0.00     | 0.00     | 0.00     | 0.00     |
| GT8        | 0.09     | 0.12     | 0.09     | 0.13     | 0.07     | 0.09    | 0.12     | 0.11     | 0.14     | 0.09     | 0.10     | 0.22     | 0.28     |
| GT50       | 0.00     | 0.00     | 0.00     | 0.00     | 0.00     | 0.00    | 0.00     | 0.00     | 0.00     | 0.00     | 0.00     | 0.00     | 0.00     |
| GT20       | 0.08     | 0.07     | 0.06     | 0.11     | 0.13     | 0.09    | 0.05     | 0.03     | 0.03     | 0.10     | 0.10     | 0.04     | 0.10     |
| PL9        | 0.05     | 0.06     | 0.15     | 0.10     | 0.20     | 0.03    | 0.05     | 0.09     | 0.07     | 0.01     | 0.10     | 0.15     | 0.08     |
| GH55       | 0.01     | 0.01     | 0.05     | 0.01     | 0.06     | 0.00    | 0.01     | 0.10     | 0.02     | 0.01     | 0.01     | 0.00     | 0.05     |
| GH64       | 0.01     | 0.00     | 0.01     | 0.00     | 0.00     | 0.00    | 0.01     | 0.01     | 0.00     | 0.00     | 0.00     | 0.00     | 0.02     |
| GH127      | 0.34     | 0.34     | 0.31     | 0.27     | 0.42     | 0.52    | 0.28     | 0.23     | 0.20     | 0.30     | 0.37     | 0.15     | 0.27     |
| GH103      | 0.01     | 0.00     | 0.00     | 0.00     | 0.00     | 0.06    | 0.01     | 0.00     | 0.01     | 0.00     | 0.00     | 0.00     | 0.02     |
| GH3        | 3.01     | 3.43     | 2.65     | 2.55     | 4.36     | 2.58    | 2.24     | 2.63     | 2.00     | 2.42     | 2.57     | 2.91     | 2.95     |
| GT45       | 0.00     | 0.00     | 0.00     | 0.00     | 0.00     | 0.00    | 0.00     | 0.00     | 0.00     | 0.00     | 0.00     | 0.00     | 0.00     |
| GT74       | 0.00     | 0.00     | 0.00     | 0.00     | 0.00     | 0.00    | 0.00     | 0.00     | 0.00     | 0.00     | 0.00     | 0.00     | 0.00     |
| GT90       | 0.00     | 0.01     | 0.01     | 0.01     | 0.00     | 0.00    | 0.00     | 0.00     | 0.00     | 0.00     | 0.00     | 0.00     | 0.00     |
| GH116      | 0.04     | 0.01     | 0.03     | 0.07     | 0.11     | 0.00    | 0.05     | 0.06     | 0.02     | 0.08     | 0.03     | 0.04     | 0.05     |
| GH31       | 1.14     | 1.20     | 0.84     | 1.04     | 1.60     | 0.95    | 0.81     | 1.16     | 1.01     | 0.98     | 0.84     | 1.27     | 1.10     |
| GT12       | 0.00     | 0.00     | 0.00     | 0.00     | 0.00     | 0.00    | 0.00     | 0.00     | 0.00     | 0.00     | 0.00     | 0.00     | 0.00     |
| CE1        | 0.29     | 0.29     | 0.36     | 0.37     | 0.59     | 0.22    | 0.31     | 0.31     | 0.27     | 0.29     | 0.36     | 0.37     | 0.72     |
| GH121      | 0.04     | 0.01     | 0.00     | 0.03     | 0.00     | 0.06    | 0.05     | 0.00     | 0.00     | 0.00     | 0.00     | 0.00     | 0.00     |
| GH79       | 0.00     | 0.02     | 0.00     | 0.02     | 0.00     | 0.00    | 0.00     | 0.00     | 0.00     | 0.01     | 0.00     | 0.00     | 0.00     |
| GT73       | 0.01     | 0.00     | 0.00     | 0.00     | 0.00     | 0.00    | 0.00     | 0.00     | 0.00     | 0.00     | 0.00     | 0.00     | 0.00     |
| GH77       | 0.80     | 0.79     | 0.71     | 0.51     | 0.65     | 0.37    | 0.66     | 0.77     | 0.83     | 0.54     | 0.46     | 0.60     | 0.53     |
| PL17       | 0.01     | 0.00     | 0.00     | 0.03     | 0.00     | 0.00    | 0.00     | 0.00     | 0.02     | 0.00     | 0.00     | 0.02     | 0.00     |
| PL8        | 0.17     | 0.16     | 0.29     | 0.32     | 0.59     | 0.15    | 0.13     | 0.33     | 0.07     | 0.28     | 0.27     | 0.28     | 0.57     |

| CAZY_group | AM-AD-75 | AM-AD-76 | AM-AD-77 | AM-AD-78 | AM-AD-79 | AM-AD-8 | AM-AD-80 | AM-AD-81 | AM-AD-82 | AM-AD-83 | AM-AD-84 | AM-AD-85 | AM-AD-86 |      |
|------------|----------|----------|----------|----------|----------|---------|----------|----------|----------|----------|----------|----------|----------|------|
| CE9        |          | 0.40     | 0.37     | 0.38     | 0.33     | 0.47    | 0.68     | 0.27     | 0.50     | 0.41     | 0.30     | 0.28     | 0.56     | 0.38 |
| CE15       |          | 0.02     | 0.00     | 0.00     | 0.03     | 0.02    | 0.00     | 0.01     | 0.01     | 0.01     | 0.00     | 0.01     | 0.00     | 0.00 |
| GT79       |          | 0.00     | 0.00     | 0.00     | 0.00     | 0.00    | 0.00     | 0.00     | 0.00     | 0.00     | 0.00     | 0.00     | 0.00     | 0.00 |
| GT10       |          | 0.01     | 0.00     | 0.02     | 0.01     | 0.00    | 0.00     | 0.01     | 0.01     | 0.00     | 0.00     | 0.03     | 0.02     | 0.00 |
| GH119      |          | 0.00     | 0.00     | 0.00     | 0.00     | 0.00    | 0.00     | 0.00     | 0.00     | 0.00     | 0.00     | 0.00     | 0.00     | 0.00 |
| GH16       |          | 0.13     | 0.19     | 0.18     | 0.19     | 0.28    | 0.22     | 0.13     | 0.17     | 0.05     | 0.26     | 0.16     | 0.24     | 0.37 |
| GH43       |          | 1.83     | 1.87     | 1.73     | 2.05     | 3.35    | 2.03     | 1.42     | 1.80     | 0.88     | 1.56     | 2.01     | 2.45     | 2.46 |
| GH51       |          | 0.64     | 0.58     | 0.41     | 0.65     | 0.64    | 0.58     | 0.46     | 0.43     | 0.33     | 0.59     | 0.58     | 0.47     | 0.42 |
| GT35       |          | 1.17     | 1.13     | 0.96     | 0.93     | 1.03    | 1.14     | 1.07     | 1.10     | 1.11     | 0.84     | 0.81     | 1.01     | 0.88 |
| GT25       |          | 0.00     | 0.00     | 0.00     | 0.00     | 0.00    | 0.00     | 0.01     | 0.00     | 0.02     | 0.00     | 0.00     | 0.00     | 0.05 |
| GT2        |          | 4.98     | 4.81     | 4.31     | 4.22     | 4.79    | 3.72     | 4.11     | 4.62     | 3.95     | 4.30     | 3.89     | 3.81     | 5.24 |
| GT51       |          | 1.03     | 0.95     | 0.89     | 0.92     | 1.00    | 0.95     | 0.76     | 0.97     | 0.92     | 1.00     | 0.89     | 0.93     | 1.11 |
| GH107      |          | 0.00     | 0.00     | 0.00     | 0.00     | 0.00    | 0.00     | 0.00     | 0.00     | 0.00     | 0.00     | 0.00     | 0.00     | 0.00 |
| GH7        |          | 0.00     | 0.00     | 0.00     | 0.00     | 0.00    | 0.00     | 0.00     | 0.00     | 0.00     | 0.00     | 0.00     | 0.00     | 0.00 |
| GT7        |          | 0.00     | 0.00     | 0.00     | 0.00     | 0.00    | 0.00     | 0.00     | 0.00     | 0.00     | 0.00     | 0.00     | 0.00     | 0.00 |
| GT36       |          | 0.00     | 0.00     | 0.00     | 0.00     | 0.00    | 0.00     | 0.00     | 0.00     | 0.00     | 0.00     | 0.00     | 0.00     | 0.00 |
| PL7        |          | 0.00     | 0.00     | 0.00     | 0.00     | 0.00    | 0.00     | 0.00     | 0.00     | 0.00     | 0.00     | 0.00     | 0.00     | 0.00 |
| GH110      |          | 0.09     | 0.07     | 0.07     | 0.13     | 0.27    | 0.09     | 0.05     | 0.12     | 0.01     | 0.10     | 0.12     | 0.06     | 0.13 |
| GT21       |          | 0.00     | 0.00     | 0.00     | 0.00     | 0.00    | 0.00     | 0.00     | 0.00     | 0.00     | 0.00     | 0.00     | 0.00     | 0.00 |
| GH62       |          | 0.00     | 0.00     | 0.00     | 0.00     | 0.00    | 0.00     | 0.01     | 0.01     | 0.00     | 0.00     | 0.00     | 0.00     | 0.00 |
| GH125      |          | 0.14     | 0.15     | 0.13     | 0.17     | 0.22    | 0.12     | 0.12     | 0.18     | 0.10     | 0.11     | 0.18     | 0.19     | 0.17 |
| GH117      |          | 0.08     | 0.07     | 0.08     | 0.08     | 0.13    | 0.09     | 0.05     | 0.07     | 0.02     | 0.15     | 0.12     | 0.06     | 0.10 |
| GH68       |          | 0.00     | 0.00     | 0.00     | 0.00     | 0.00    | 0.00     | 0.00     | 0.00     | 0.00     | 0.00     | 0.00     | 0.00     | 0.00 |
| GH85       |          | 0.02     | 0.03     | 0.05     | 0.01     | 0.01    | 0.00     | 0.03     | 0.00     | 0.02     | 0.00     | 0.01     | 0.06     | 0.05 |
| GH92       |          | 1.18     | 1.24     | 1.63     | 1.53     | 2.49    | 1.45     | 0.94     | 1.70     | 0.76     | 1.14     | 1.90     | 2.15     | 1.83 |
| GH40       |          | 0.00     | 0.00     | 0.00     | 0.00     | 0.00    | 0.00     | 0.00     | 0.00     | 0.00     | 0.00     | 0.00     | 0.00     | 0.00 |
| GT49       |          | 0.00     | 0.00     | 0.00     | 0.01     | 0.00    | 0.00     | 0.00     | 0.00     | 0.00     | 0.00     | 0.00     | 0.00     | 0.00 |
| GH112      |          | 0.30     | 0.26     | 0.20     | 0.16     | 0.20    | 0.12     | 0.20     | 0.21     | 0.28     | 0.20     | 0.10     | 0.41     | 0.22 |
| GT67       |          | 0.00     | 0.00     | 0.00     | 0.00     | 0.00    | 0.00     | 0.00     | 0.00     | 0.00     | 0.00     | 0.00     | 0.00     | 0.00 |
| CE8        |          | 0.16     | 0.21     | 0.28     | 0.21     | 0.38    | 0.34     | 0.15     | 0.16     | 0.14     | 0.14     | 0.16     | 0.13     | 0.27 |
| GT86       |          | 0.00     | 0.00     | 0.00     | 0.00     | 0.00    | 0.00     | 0.00     | 0.00     | 0.00     | 0.00     | 0.00     | 0.00     | 0.00 |
| GH101      |          | 0.11     | 0.03     | 0.01     | 0.00     | 0.02    | 0.00     | 0.02     | 0.02     | 0.00     | 0.02     | 0.01     | 0.15     | 0.05 |
| GH81       |          | 0.01     | 0.01     | 0.01     | 0.00     | 0.01    | 0.00     | 0.02     | 0.01     | 0.01     | 0.00     | 0.00     | 0.00     | 0.00 |
| GT93       |          | 0.00     | 0.00     | 0.00     | 0.00     | 0.00    | 0.00     | 0.00     | 0.00     | 0.00     | 0.00     | 0.00     | 0.00     | 0.00 |
| GT63       |          | 0.00     | 0.00     | 0.00     | 0.00     | 0.00    | 0.00     | 0.00     | 0.00     | 0.00     | 0.00     | 0.00     | 0.00     | 0.00 |
| CE11       |          | 0.20     | 0.20     | 0.20     | 0.25     | 0.22    | 0.31     | 0.22     | 0.19     | 0.19     | 0.28     | 0.28     | 0.13     | 0.33 |
| GT19       |          | 0.10     | 0.09     | 0.13     | 0.13     | 0.10    | 0.22     | 0.13     | 0.11     | 0.08     | 0.17     | 0.20     | 0.09     | 0.22 |
| GT33       |          | 0.00     | 0.00     | 0.00     | 0.00     | 0.00    | 0.00     | 0.00     | 0.00     | 0.00     | 0.00     | 0.00     | 0.00     | 0.00 |
| GH21       |          | 0.00     | 0.00     | 0.00     | 0.00     | 0.00    | 0.00     | 0.00     | 0.00     | 0.00     | 0.00     | 0.00     | 0.00     | 0.00 |
| GT68       |          | 0.00     | 0.00     | 0.00     | 0.00     | 0.00    | 0.00     | 0.00     | 0.00     | 0.00     | 0.00     | 0.00     | 0.00     | 0.00 |
| GH89       |          | 0.20     | 0.15     | 0.31     | 0.26     | 0.47    | 0.34     | 0.11     | 0.20     | 0.08     | 0.25     | 0.24     | 0.45     | 0.23 |
| GT82       |          | 0.00     | 0.00     | 0.00     | 0.00     | 0.00    | 0.00     | 0.00     | 0.00     | 0.00     | 0.00     | 0.00     | 0.00     | 0.00 |
| GH30       |          | 0.19     | 0.23     | 0.18     | 0.20     | 0.44    | 0.46     | 0.17     | 0.21     | 0.06     | 0.13     | 0.15     | 0.30     | 0.42 |
| GH20       |          | 1.03     | 0.92     | 1.16     | 1.16     | 1.71    | 1.29     | 0.85     | 1.24     | 0.42     | 1.11     | 1.26     | 1.08     | 1.10 |
| GH52       |          | 0.00     | 0.00     | 0.00     | 0.00     | 0.00    | 0.00     | 0.00     | 0.00     | 0.00     | 0.00     | 0.00     | 0.00     | 0.00 |
| GT84       |          | 0.01     | 0.04     | 0.01     | 0.03     | 0.00    | 0.00     | 0.01     | 0.00     | 0.00     | 0.00     | 0.01     | 0.00     | 0.00 |
| GT15       |          | 0.00     | 0.00     | 0.00     | 0.00     | 0.00    | 0.00     | 0.00     | 0.00     | 0.00     | 0.00     | 0.00     | 0.00     | 0.00 |
| GH93       |          | 0.01     | 0.00     | 0.01     | 0.00     | 0.01    | 0.00     | 0.02     | 0.01     | 0.01     | 0.00     | 0.00     | 0.00     | 0.00 |
| PL16       |          | 0.00     | 0.00     | 0.00     | 0.00     | 0.00    | 0.00     | 0.00     | 0.00     | 0.00     | 0.00     | 0.00     | 0.00     | 0.00 |
| GH26       |          | 0.08     | 0.20     | 0.15     | 0.08     | 0.15    | 0.00     | 0.10     | 0.09     | 0.05     | 0.08     | 0.12     | 0.04     | 0.18 |



| CAZY_group | AM-AD-75 | AM-AD-76 | AM-AD-77 | AM-AD-78 | AM-AD-79 | AM-AD-8 | AM-AD-80 | AM-AD-81 | AM-AD-82 | AM-AD-83 | AM-AD-84 | AM-AD-85 | AM-AD-86 |
|------------|----------|----------|----------|----------|----------|---------|----------|----------|----------|----------|----------|----------|----------|
| GT52       |          | 0.00     | 0.00     | 0.00     | 0.00     | 0.00    | 0.00     | 0.00     | 0.00     | 0.02     | 0.00     | 0.00     | 0.00     |
| GT64       |          | 0.00     | 0.00     | 0.00     | 0.00     | 0.00    | 0.00     | 0.00     | 0.00     | 0.00     | 0.00     | 0.00     | 0.00     |
| GT85       |          | 0.00     | 0.00     | 0.00     | 0.00     | 0.00    | 0.00     | 0.00     | 0.00     | 0.00     | 0.00     | 0.00     | 0.00     |
| GT16       |          | 0.00     | 0.00     | 0.00     | 0.00     | 0.00    | 0.00     | 0.00     | 0.00     | 0.00     | 0.00     | 0.00     | 0.00     |
| GH56       |          | 0.00     | 0.00     | 0.00     | 0.00     | 0.00    | 0.00     | 0.00     | 0.00     | 0.00     | 0.00     | 0.00     | 0.00     |
| GT60       |          | 0.00     | 0.00     | 0.00     | 0.00     | 0.00    | 0.00     | 0.00     | 0.00     | 0.00     | 0.00     | 0.00     | 0.00     |
| GH41       |          | 0.00     | 0.00     | 0.00     | 0.00     | 0.00    | 0.00     | 0.00     | 0.00     | 0.00     | 0.00     | 0.00     | 0.00     |
| CE7        |          | 0.12     | 0.12     | 0.09     | 0.09     | 0.14    | 0.12     | 0.04     | 0.10     | 0.10     | 0.04     | 0.09     | 0.06     |
| GH39       |          | 0.06     | 0.06     | 0.06     | 0.06     | 0.05    | 0.03     | 0.04     | 0.02     | 0.02     | 0.02     | 0.02     | 0.02     |
| GT30       |          | 0.19     | 0.16     | 0.24     | 0.19     | 0.28    | 0.40     | 0.23     | 0.22     | 0.15     | 0.24     | 0.31     | 0.22     |
| PL15       |          | 0.06     | 0.16     | 0.14     | 0.09     | 0.20    | 0.22     | 0.06     | 0.07     | 0.03     | 0.10     | 0.15     | 0.26     |
| GH102      |          | 0.02     | 0.01     | 0.01     | 0.02     | 0.00    | 0.00     | 0.00     | 0.00     | 0.06     | 0.00     | 0.01     | 0.00     |



| CAZY_group | AM-AD-87 | AM-AD-88 | AM-AD-89 | AM-AD-9 | AM-AD-90 | AM-AD-91 | AM-AD-92 | DA-AD-1 | DA-AD-10 | DA-AD-11 | DA-AD-12 | DA-AD-13 | DA-AD-14 |
|------------|----------|----------|----------|---------|----------|----------|----------|---------|----------|----------|----------|----------|----------|
| GH29       | 0.66     | 0.69     | 0.61     | 0.93    | 1.12     | 0.85     | 0.68     | 0.70    | 0.61     | 0.58     | 0.57     | 1.58     | 0.64     |
| PL4        | 0.00     | 0.00     | 0.00     | 0.00    | 0.00     | 0.00     | 0.00     | 0.00    | 0.00     | 0.00     | 0.00     | 0.00     | 0.00     |
| GH23       | 1.25     | 1.40     | 1.30     | 1.32    | 1.40     | 1.20     | 1.34     | 1.29    | 1.28     | 1.24     | 0.78     | 1.52     | 0.99     |
| CE6        | 0.02     | 0.02     | 0.02     | 0.09    | 0.08     | 0.02     | 0.04     | 0.07    | 0.00     | 0.03     | 0.05     | 0.03     | 0.02     |
| GH72       | 0.14     | 0.17     | 0.15     | 0.15    | 0.17     | 0.12     | 0.17     | 0.22    | 0.26     | 0.26     | 0.10     | 0.06     | 0.08     |
| GH114      | 0.00     | 0.00     | 0.00     | 0.00    | 0.00     | 0.00     | 0.00     | 0.00    | 0.00     | 0.00     | 0.00     | 0.00     | 0.00     |
| GH78       | 1.04     | 1.29     | 0.78     | 1.44    | 1.28     | 0.85     | 1.13     | 0.73    | 0.38     | 0.76     | 0.38     | 1.18     | 0.51     |
| PL19       | 0.00     | 0.00     | 0.00     | 0.00    | 0.00     | 0.00     | 0.00     | 0.00    | 0.00     | 0.00     | 0.00     | 0.00     | 0.00     |
| GT27       | 0.00     | 0.00     | 0.00     | 0.00    | 0.00     | 0.00     | 0.00     | 0.00    | 0.00     | 0.00     | 0.00     | 0.00     | 0.00     |
| GH5        | 0.46     | 0.59     | 0.37     | 0.21    | 0.37     | 0.18     | 0.50     | 0.57    | 0.93     | 0.39     | 0.47     | 0.39     | 0.40     |
| GT40       | 0.00     | 0.00     | 0.00     | 0.00    | 0.00     | 0.00     | 0.00     | 0.00    | 0.00     | 0.00     | 0.00     | 0.00     | 0.00     |
| CE13       | 0.00     | 0.00     | 0.00     | 0.00    | 0.00     | 0.00     | 0.00     | 0.00    | 0.00     | 0.00     | 0.00     | 0.00     | 0.00     |
| GT37       | 0.00     | 0.00     | 0.00     | 0.00    | 0.00     | 0.00     | 0.00     | 0.00    | 0.00     | 0.00     | 0.00     | 0.00     | 0.00     |
| GH33       | 0.17     | 0.15     | 0.20     | 0.39    | 0.52     | 0.51     | 0.28     | 0.13    | 0.13     | 0.26     | 0.21     | 0.20     | 0.24     |
| GT65       | 0.00     | 0.00     | 0.00     | 0.00    | 0.00     | 0.00     | 0.00     | 0.00    | 0.00     | 0.00     | 0.00     | 0.00     | 0.00     |
| GH86       | 0.00     | 0.00     | 0.00     | 0.00    | 0.00     | 0.00     | 0.00     | 0.01    | 0.00     | 0.00     | 0.00     | 0.00     | 0.00     |
| GH123      | 0.09     | 0.17     | 0.05     | 0.30    | 0.19     | 0.12     | 0.15     | 0.13    | 0.06     | 0.08     | 0.11     | 0.17     | 0.05     |
| GH96       | 0.00     | 0.00     | 0.00     | 0.00    | 0.00     | 0.00     | 0.00     | 0.00    | 0.00     | 0.00     | 0.00     | 0.00     | 0.00     |
| GH14       | 0.00     | 0.00     | 0.00     | 0.00    | 0.00     | 0.00     | 0.00     | 0.00    | 0.00     | 0.00     | 0.00     | 0.00     | 0.00     |
| CE3        | 0.00     | 0.00     | 0.00     | 0.00    | 0.00     | 0.00     | 0.00     | 0.00    | 0.00     | 0.00     | 0.00     | 0.00     | 0.00     |
| PL10       | 0.07     | 0.18     | 0.11     | 0.09    | 0.08     | 0.30     | 0.11     | 0.10    | 0.13     | 0.05     | 0.07     | 0.11     | 0.05     |
| GT48       | 0.00     | 0.00     | 0.00     | 0.00    | 0.00     | 0.00     | 0.00     | 0.00    | 0.00     | 0.00     | 0.00     | 0.00     | 0.00     |
| PL6        | 0.00     | 0.00     | 0.01     | 0.00    | 0.00     | 0.00     | 0.00     | 0.00    | 0.00     | 0.00     | 0.00     | 0.00     | 0.00     |
| GT83       | 0.09     | 0.12     | 0.06     | 0.12    | 0.19     | 0.25     | 0.08     | 0.11    | 0.00     | 0.05     | 0.05     | 0.08     | 0.07     |
| GH126      | 0.00     | 0.00     | 0.00     | 0.00    | 0.00     | 0.00     | 0.00     | 0.00    | 0.00     | 0.00     | 0.00     | 0.00     | 0.00     |
| GH9        | 0.11     | 0.21     | 0.05     | 0.00    | 0.22     | 0.18     | 0.17     | 0.10    | 1.06     | 0.29     | 0.12     | 0.20     | 0.20     |
| GH75       | 0.00     | 0.00     | 0.00     | 0.00    | 0.00     | 0.00     | 0.00     | 0.00    | 0.00     | 0.00     | 0.00     | 0.00     | 0.00     |
| GT71       | 0.00     | 0.00     | 0.00     | 0.00    | 0.00     | 0.00     | 0.00     | 0.00    | 0.00     | 0.00     | 0.00     | 0.00     | 0.00     |
| GH46       | 0.00     | 0.00     | 0.00     | 0.00    | 0.00     | 0.00     | 0.01     | 0.00    | 0.00     | 0.00     | 0.00     | 0.00     | 0.00     |
| GT61       | 0.00     | 0.00     | 0.00     | 0.00    | 0.00     | 0.00     | 0.00     | 0.00    | 0.00     | 0.00     | 0.00     | 0.00     | 0.00     |
| GT3        | 0.26     | 0.29     | 0.19     | 0.24    | 0.45     | 0.14     | 0.21     | 0.20    | 0.16     | 0.29     | 0.16     | 0.31     | 0.17     |
| PL3        | 0.00     | 0.00     | 0.00     | 0.00    | 0.00     | 0.00     | 0.00     | 0.00    | 0.00     | 0.00     | 0.00     | 0.00     | 0.00     |
| GH108      | 0.04     | 0.06     | 0.02     | 0.00    | 0.06     | 0.09     | 0.06     | 0.02    | 0.06     | 0.03     | 0.00     | 0.00     | 0.01     |
| GT56       | 0.00     | 0.00     | 0.00     | 0.00    | 0.00     | 0.00     | 0.00     | 0.00    | 0.00     | 0.03     | 0.00     | 0.00     | 0.00     |
| PL11       | 0.18     | 0.18     | 0.20     | 0.66    | 0.18     | 0.16     | 0.11     | 0.10    | 0.06     | 0.11     | 0.07     | 0.17     | 0.06     |
| GH45       | 0.00     | 0.00     | 0.00     | 0.00    | 0.00     | 0.00     | 0.00     | 0.00    | 0.00     | 0.00     | 0.00     | 0.00     | 0.00     |
| GT34       | 0.00     | 0.00     | 0.01     | 0.00    | 0.00     | 0.00     | 0.00     | 0.00    | 0.03     | 0.00     | 0.00     | 0.00     | 0.00     |
| PL14       | 0.00     | 0.00     | 0.00     | 0.00    | 0.00     | 0.00     | 0.00     | 0.00    | 0.00     | 0.00     | 0.00     | 0.00     | 0.00     |
| GH19       | 0.00     | 0.00     | 0.00     | 0.00    | 0.01     | 0.00     | 0.00     | 0.00    | 0.00     | 0.03     | 0.00     | 0.00     | 0.00     |
| GH118      | 0.00     | 0.00     | 0.00     | 0.00    | 0.00     | 0.00     | 0.00     | 0.00    | 0.00     | 0.00     | 0.00     | 0.00     | 0.00     |
| GH82       | 0.00     | 0.00     | 0.00     | 0.00    | 0.00     | 0.00     | 0.00     | 0.00    | 0.00     | 0.00     | 0.00     | 0.00     | 0.00     |
| GH76       | 0.23     | 0.09     | 0.09     | 0.72    | 0.35     | 0.23     | 0.14     | 0.14    | 0.10     | 0.11     | 0.03     | 0.06     | 0.07     |
| GT4        | 1.69     | 2.40     | 2.27     | 2.16    | 2.65     | 1.45     | 2.28     | 2.65    | 1.73     | 1.95     | 1.41     | 2.28     | 1.61     |
| GT87       | 0.00     | 0.00     | 0.00     | 0.03    | 0.01     | 0.00     | 0.01     | 0.03    | 0.00     | 0.00     | 0.00     | 0.00     | 0.00     |
| GH24       | 0.13     | 0.20     | 0.09     | 0.18    | 0.15     | 0.30     | 0.09     | 0.09    | 0.03     | 0.08     | 0.05     | 0.08     | 0.09     |
| GH90       | 0.00     | 0.00     | 0.00     | 0.00    | 0.00     | 0.00     | 0.00     | 0.00    | 0.00     | 0.00     | 0.00     | 0.00     | 0.00     |
| GH57       | 0.14     | 0.21     | 0.14     | 0.15    | 0.25     | 0.16     | 0.15     | 0.15    | 0.06     | 0.18     | 0.17     | 0.17     | 0.15     |
| GH36       | 0.66     | 0.95     | 0.58     | 0.90    | 1.01     | 0.90     | 0.92     | 0.74    | 1.18     | 0.84     | 0.45     | 0.73     | 0.59     |
| GT46       | 0.00     | 0.00     | 0.00     | 0.00    | 0.00     | 0.00     | 0.00     | 0.00    | 0.00     | 0.00     | 0.00     | 0.00     | 0.00     |
| GH66       | 0.06     | 0.02     | 0.02     | 0.12    | 0.05     | 0.00     | 0.05     | 0.03    | 0.03     | 0.03     | 0.04     | 0.06     | 0.00     |

| CAZY_group | AM-AD-87 | AM-AD-88 | AM-AD-89 | AM-AD-9 | AM-AD-90 | AM-AD-91 | AM-AD-92 | DA-AD-1 | DA-AD-10 | DA-AD-11 | DA-AD-12 | DA-AD-13 | DA-AD-14 |
|------------|----------|----------|----------|---------|----------|----------|----------|---------|----------|----------|----------|----------|----------|
| GH48       | 0.00     | 0.00     | 0.00     | 0.00    | 0.00     | 0.00     | 0.00     | 0.00    | 0.00     | 0.00     | 0.00     | 0.00     | 0.00     |
| GT53       | 0.00     | 0.00     | 0.00     | 0.00    | 0.00     | 0.00     | 0.00     | 0.00    | 0.00     | 0.00     | 0.00     | 0.00     | 0.00     |
| GH60       | 0.00     | 0.00     | 0.00     | 0.00    | 0.00     | 0.00     | 0.00     | 0.00    | 0.00     | 0.00     | 0.00     | 0.00     | 0.00     |
| GT31       | 0.00     | 0.00     | 0.00     | 0.00    | 0.00     | 0.00     | 0.00     | 0.00    | 0.00     | 0.00     | 0.00     | 0.00     | 0.00     |
| GH105      | 0.45     | 0.66     | 0.49     | 1.14    | 0.85     | 0.64     | 0.60     | 0.49    | 0.58     | 0.55     | 0.28     | 1.15     | 0.26     |
| GT23       | 0.00     | 0.02     | 0.02     | 0.00    | 0.02     | 0.00     | 0.01     | 0.01    | 0.06     | 0.00     | 0.01     | 0.03     | 0.00     |
| GH11       | 0.00     | 0.00     | 0.00     | 0.00    | 0.00     | 0.00     | 0.00     | 0.01    | 0.00     | 0.06     | 0.00     | 0.03     | 0.01     |
| GT38       | 0.00     | 0.00     | 0.00     | 0.00    | 0.00     | 0.00     | 0.00     | 0.00    | 0.00     | 0.00     | 0.00     | 0.00     | 0.00     |
| GT43       | 0.00     | 0.00     | 0.00     | 0.00    | 0.00     | 0.00     | 0.00     | 0.00    | 0.00     | 0.00     | 0.00     | 0.00     | 0.00     |
| GH99       | 0.01     | 0.00     | 0.00     | 0.03    | 0.02     | 0.00     | 0.00     | 0.00    | 0.00     | 0.00     | 0.00     | 0.00     | 0.00     |
| GH38       | 0.33     | 0.62     | 0.22     | 0.39    | 0.33     | 0.12     | 0.35     | 0.20    | 0.26     | 0.21     | 0.05     | 0.45     | 0.20     |
| GH109      | 0.26     | 0.26     | 0.12     | 0.42    | 0.41     | 0.30     | 0.24     | 0.25    | 0.13     | 0.29     | 0.19     | 0.54     | 0.20     |
| GH2        | 4.41     | 5.61     | 3.81     | 6.10    | 5.68     | 4.28     | 4.56     | 4.44    | 3.87     | 4.50     | 2.33     | 6.87     | 3.16     |
| GT28       | 0.36     | 0.47     | 0.61     | 0.42    | 0.50     | 0.35     | 0.56     | 0.32    | 0.77     | 0.53     | 0.39     | 0.37     | 0.40     |
| GH42       | 0.14     | 0.29     | 0.14     | 0.21    | 0.36     | 0.16     | 0.28     | 0.20    | 0.58     | 0.45     | 0.07     | 0.25     | 0.14     |
| GT58       | 0.00     | 0.00     | 0.00     | 0.00    | 0.00     | 0.00     | 0.00     | 0.00    | 0.00     | 0.00     | 0.00     | 0.00     | 0.00     |
| GH61       | 0.00     | 0.00     | 0.00     | 0.00    | 0.00     | 0.00     | 0.00     | 0.00    | 0.00     | 0.00     | 0.00     | 0.00     | 0.00     |
| GH80       | 0.00     | 0.00     | 0.00     | 0.00    | 0.00     | 0.00     | 0.00     | 0.00    | 0.00     | 0.00     | 0.00     | 0.00     | 0.00     |
| GH98       | 0.00     | 0.00     | 0.00     | 0.00    | 0.00     | 0.00     | 0.00     | 0.02    | 0.00     | 0.03     | 0.00     | 0.00     | 0.00     |
| GH6        | 0.00     | 0.00     | 0.00     | 0.00    | 0.00     | 0.00     | 0.00     | 0.00    | 0.00     | 0.00     | 0.00     | 0.00     | 0.00     |
| GT1        | 0.02     | 0.03     | 0.07     | 0.06    | 0.03     | 0.07     | 0.02     | 0.06    | 0.13     | 0.05     | 0.06     | 0.03     | 0.00     |
| GH28       | 0.75     | 0.78     | 0.79     | 1.26    | 1.12     | 0.78     | 0.99     | 0.92    | 0.96     | 0.84     | 0.48     | 1.30     | 0.44     |
| GT42       | 0.00     | 0.00     | 0.00     | 0.00    | 0.00     | 0.00     | 0.00     | 0.00    | 0.00     | 0.00     | 0.00     | 0.00     | 0.00     |
| GH128      | 0.00     | 0.00     | 0.00     | 0.00    | 0.00     | 0.00     | 0.00     | 0.00    | 0.00     | 0.00     | 0.00     | 0.00     | 0.00     |
| CE12       | 0.09     | 0.14     | 0.24     | 0.15    | 0.19     | 0.00     | 0.13     | 0.12    | 0.26     | 0.16     | 0.05     | 0.06     | 0.05     |
| CE16       | 0.00     | 0.00     | 0.00     | 0.00    | 0.00     | 0.00     | 0.00     | 0.00    | 0.00     | 0.00     | 0.00     | 0.00     | 0.00     |
| GT89       | 0.00     | 0.00     | 0.00     | 0.00    | 0.00     | 0.00     | 0.00     | 0.00    | 0.00     | 0.00     | 0.00     | 0.00     | 0.00     |
| GT11       | 0.07     | 0.03     | 0.08     | 0.06    | 0.11     | 0.07     | 0.09     | 0.15    | 0.10     | 0.05     | 0.04     | 0.11     | 0.03     |
| GT77       | 0.00     | 0.00     | 0.00     | 0.00    | 0.00     | 0.00     | 0.00     | 0.00    | 0.03     | 0.00     | 0.00     | 0.00     | 0.00     |
| GT55       | 0.00     | 0.00     | 0.00     | 0.00    | 0.00     | 0.00     | 0.00     | 0.00    | 0.00     | 0.00     | 0.00     | 0.00     | 0.00     |
| GT18       | 0.00     | 0.00     | 0.00     | 0.00    | 0.00     | 0.00     | 0.00     | 0.00    | 0.00     | 0.00     | 0.00     | 0.00     | 0.00     |
| GH87       | 0.00     | 0.02     | 0.04     | 0.00    | 0.01     | 0.00     | 0.00     | 0.00    | 0.00     | 0.00     | 0.00     | 0.00     | 0.00     |
| PL5        | 0.00     | 0.00     | 0.00     | 0.00    | 0.00     | 0.00     | 0.00     | 0.00    | 0.00     | 0.00     | 0.00     | 0.00     | 0.00     |
| GH22       | 0.00     | 0.00     | 0.01     | 0.00    | 0.00     | 0.00     | 0.00     | 0.00    | 0.00     | 0.00     | 0.00     | 0.00     | 0.00     |
| CE2        | 0.14     | 0.15     | 0.08     | 0.03    | 0.10     | 0.05     | 0.09     | 0.03    | 0.22     | 0.08     | 0.05     | 0.06     | 0.08     |
| GH120      | 0.08     | 0.12     | 0.08     | 0.00    | 0.00     | 0.07     | 0.05     | 0.11    | 0.10     | 0.08     | 0.06     | 0.00     | 0.05     |
| GH73       | 0.48     | 0.78     | 0.59     | 0.48    | 0.77     | 0.48     | 0.72     | 0.55    | 1.09     | 0.58     | 0.44     | 0.62     | 0.54     |
| GT17       | 0.01     | 0.00     | 0.00     | 0.00    | 0.00     | 0.00     | 0.03     | 0.03    | 0.00     | 0.00     | 0.01     | 0.00     | 0.00     |
| GH124      | 0.00     | 0.00     | 0.00     | 0.00    | 0.00     | 0.00     | 0.00     | 0.00    | 0.00     | 0.00     | 0.00     | 0.00     | 0.00     |
| GH54       | 0.00     | 0.00     | 0.00     | 0.00    | 0.00     | 0.00     | 0.00     | 0.00    | 0.00     | 0.00     | 0.01     | 0.00     | 0.00     |
| GH100      | 0.00     | 0.00     | 0.00     | 0.00    | 0.00     | 0.00     | 0.00     | 0.00    | 0.00     | 0.00     | 0.00     | 0.00     | 0.00     |
| GH113      | 0.02     | 0.03     | 0.01     | 0.00    | 0.03     | 0.02     | 0.06     | 0.03    | 0.10     | 0.08     | 0.02     | 0.08     | 0.04     |
| GT5        | 0.52     | 0.42     | 0.46     | 0.18    | 0.55     | 0.41     | 0.63     | 0.53    | 0.80     | 0.42     | 0.41     | 0.42     | 0.45     |
| GH94       | 0.50     | 0.54     | 0.43     | 0.18    | 0.55     | 0.35     | 0.61     | 0.41    | 1.41     | 0.76     | 0.41     | 0.62     | 0.43     |
| GT66       | 0.00     | 0.00     | 0.00     | 0.00    | 0.00     | 0.00     | 0.00     | 0.01    | 0.00     | 0.00     | 0.00     | 0.00     | 0.02     |
| GT94       | 0.00     | 0.00     | 0.00     | 0.00    | 0.00     | 0.00     | 0.00     | 0.00    | 0.00     | 0.00     | 0.00     | 0.00     | 0.00     |
| GH58       | 0.00     | 0.00     | 0.00     | 0.00    | 0.00     | 0.00     | 0.00     | 0.00    | 0.00     | 0.00     | 0.00     | 0.00     | 0.00     |
| GH1        | 0.46     | 0.35     | 0.72     | 0.06    | 0.58     | 0.35     | 0.54     | 0.65    | 0.67     | 1.16     | 0.33     | 0.25     | 0.31     |
| PL22       | 0.00     | 0.00     | 0.00     | 0.00    | 0.00     | 0.00     | 0.00     | 0.00    | 0.00     | 0.03     | 0.00     | 0.00     | 0.00     |

| CAZY_group | AM-AD-87 | AM-AD-88 | AM-AD-89 | AM-AD-9 | AM-AD-90 | AM-AD-91 | AM-AD-92 | DA-AD-1 | DA-AD-10 | DA-AD-11 | DA-AD-12 | DA-AD-13 | DA-AD-14 |
|------------|----------|----------|----------|---------|----------|----------|----------|---------|----------|----------|----------|----------|----------|
| GT76       | 0.00     | 0.00     | 0.00     | 0.00    | 0.00     | 0.00     | 0.00     | 0.00    | 0.00     | 0.00     | 0.00     | 0.00     | 0.00     |
| GT32       | 0.06     | 0.12     | 0.04     | 0.00    | 0.00     | 0.11     | 0.05     | 0.09    | 0.11     | 0.03     | 0.05     | 0.10     | 0.08     |
| GT47       | 0.03     | 0.06     | 0.09     | 0.06    | 0.09     | 0.09     | 0.05     | 0.07    | 0.08     | 0.03     | 0.03     | 0.07     | 0.00     |
| GH84       | 0.08     | 0.08     | 0.11     | 0.09    | 0.20     | 0.09     | 0.07     | 0.09    | 0.10     | 0.13     | 0.10     | 0.23     | 0.10     |
| GH83       | 0.00     | 0.00     | 0.00     | 0.00    | 0.00     | 0.00     | 0.00     | 0.00    | 0.00     | 0.00     | 0.00     | 0.00     | 0.00     |
| GT59       | 0.00     | 0.00     | 0.00     | 0.00    | 0.00     | 0.00     | 0.00     | 0.00    | 0.00     | 0.00     | 0.00     | 0.00     | 0.00     |
| GH34       | 0.00     | 0.00     | 0.00     | 0.00    | 0.00     | 0.00     | 0.00     | 0.00    | 0.00     | 0.00     | 0.00     | 0.00     | 0.00     |
| GT14       | 0.01     | 0.00     | 0.02     | 0.03    | 0.03     | 0.00     | 0.02     | 0.01    | 0.06     | 0.05     | 0.03     | 0.08     | 0.01     |
| GH47       | 0.00     | 0.00     | 0.00     | 0.00    | 0.00     | 0.00     | 0.00     | 0.00    | 0.00     | 0.00     | 0.00     | 0.00     | 0.00     |
| GH97       | 0.69     | 1.08     | 0.56     | 1.86    | 1.54     | 1.11     | 0.96     | 0.82    | 1.11     | 0.77     | 1.00     | 0.37     | 1.72     |
| GH50       | 0.02     | 0.05     | 0.04     | 0.27    | 0.07     | 0.00     | 0.08     | 0.03    | 0.00     | 0.03     | 0.00     | 0.03     | 0.00     |
| GT26       | 0.17     | 0.20     | 0.21     | 0.27    | 0.15     | 0.09     | 0.19     | 0.20    | 0.32     | 0.32     | 0.16     | 0.23     | 0.21     |
| GH18       | 0.52     | 0.71     | 0.69     | 1.11    | 0.98     | 0.55     | 0.66     | 0.65    | 0.51     | 0.42     | 0.36     | 0.68     | 0.44     |
| GH37       | 0.00     | 0.00     | 0.02     | 0.00    | 0.01     | 0.00     | 0.01     | 0.00    | 0.00     | 0.00     | 0.05     | 0.00     | 0.00     |
| PL13       | 0.06     | 0.05     | 0.04     | 0.09    | 0.08     | 0.09     | 0.05     | 0.01    | 0.03     | 0.00     | 0.01     | 0.11     | 0.01     |
| GH27       | 0.19     | 0.26     | 0.29     | 0.45    | 0.40     | 0.25     | 0.25     | 0.20    | 0.29     | 0.18     | 0.18     | 0.25     | 0.18     |
| GT54       | 0.00     | 0.00     | 0.00     | 0.00    | 0.00     | 0.00     | 0.00     | 0.00    | 0.00     | 0.00     | 0.00     | 0.00     | 0.00     |
| GT91       | 0.00     | 0.00     | 0.00     | 0.00    | 0.00     | 0.00     | 0.00     | 0.00    | 0.00     | 0.00     | 0.00     | 0.00     | 0.00     |
| GT72       | 0.00     | 0.00     | 0.00     | 0.00    | 0.00     | 0.00     | 0.00     | 0.00    | 0.00     | 0.00     | 0.00     | 0.00     | 0.00     |
| GH67       | 0.06     | 0.06     | 0.08     | 0.09    | 0.05     | 0.05     | 0.12     | 0.09    | 0.03     | 0.08     | 0.08     | 0.11     | 0.05     |
| GH12       | 0.00     | 0.00     | 0.00     | 0.00    | 0.00     | 0.00     | 0.00     | 0.00    | 0.00     | 0.00     | 0.00     | 0.00     | 0.00     |
| GH91       | 0.02     | 0.06     | 0.02     | 0.00    | 0.01     | 0.00     | 0.05     | 0.02    | 0.03     | 0.00     | 0.02     | 0.06     | 0.02     |
| GT69       | 0.00     | 0.00     | 0.00     | 0.00    | 0.00     | 0.00     | 0.00     | 0.00    | 0.00     | 0.00     | 0.00     | 0.00     | 0.00     |
| GH106      | 0.18     | 0.24     | 0.24     | 0.42    | 0.28     | 0.30     | 0.24     | 0.26    | 0.22     | 0.26     | 0.11     | 0.37     | 0.09     |
| GT62       | 0.00     | 0.00     | 0.00     | 0.00    | 0.00     | 0.00     | 0.00     | 0.00    | 0.00     | 0.00     | 0.00     | 0.00     | 0.00     |
| GH17       | 0.00     | 0.00     | 0.02     | 0.00    | 0.00     | 0.00     | 0.00     | 0.00    | 0.01     | 0.00     | 0.00     | 0.00     | 0.00     |
| GH88       | 0.42     | 0.41     | 0.14     | 0.78    | 0.66     | 0.37     | 0.48     | 0.21    | 0.35     | 0.39     | 0.10     | 0.82     | 0.22     |
| CE5        | 0.00     | 0.00     | 0.00     | 0.00    | 0.00     | 0.00     | 0.00     | 0.00    | 0.00     | 0.00     | 0.00     | 0.00     | 0.00     |
| GT8        | 0.03     | 0.15     | 0.18     | 0.06    | 0.15     | 0.02     | 0.09     | 0.14    | 0.10     | 0.11     | 0.08     | 0.11     | 0.05     |
| GT50       | 0.00     | 0.00     | 0.00     | 0.00    | 0.00     | 0.00     | 0.00     | 0.00    | 0.00     | 0.00     | 0.00     | 0.00     | 0.00     |
| GT20       | 0.11     | 0.12     | 0.08     | 0.09    | 0.17     | 0.16     | 0.08     | 0.08    | 0.06     | 0.08     | 0.06     | 0.17     | 0.05     |
| PL9        | 0.04     | 0.09     | 0.14     | 0.12    | 0.14     | 0.02     | 0.06     | 0.13    | 0.22     | 0.13     | 0.01     | 0.08     | 0.00     |
| GH55       | 0.02     | 0.02     | 0.04     | 0.00    | 0.07     | 0.12     | 0.08     | 0.01    | 0.10     | 0.05     | 0.00     | 0.06     | 0.01     |
| GH64       | 0.00     | 0.00     | 0.02     | 0.00    | 0.00     | 0.00     | 0.00     | 0.01    | 0.00     | 0.00     | 0.01     | 0.00     | 0.00     |
| GH127      | 0.26     | 0.35     | 0.21     | 0.42    | 0.48     | 0.35     | 0.34     | 0.42    | 0.22     | 0.34     | 0.17     | 0.56     | 0.32     |
| GH103      | 0.00     | 0.00     | 0.02     | 0.00    | 0.00     | 0.00     | 0.00     | 0.00    | 0.00     | 0.00     | 0.03     | 0.01     | 0.00     |
| GH3        | 2.88     | 4.58     | 2.21     | 3.34    | 3.58     | 3.34     | 3.21     | 2.77    | 3.26     | 2.92     | 1.52     | 4.42     | 2.12     |
| GT45       | 0.00     | 0.00     | 0.00     | 0.00    | 0.00     | 0.00     | 0.00     | 0.00    | 0.00     | 0.00     | 0.00     | 0.00     | 0.00     |
| GT74       | 0.00     | 0.00     | 0.00     | 0.00    | 0.00     | 0.00     | 0.00     | 0.00    | 0.00     | 0.00     | 0.00     | 0.00     | 0.00     |
| GT90       | 0.00     | 0.00     | 0.00     | 0.00    | 0.00     | 0.00     | 0.00     | 0.01    | 0.00     | 0.00     | 0.00     | 0.00     | 0.00     |
| GH116      | 0.06     | 0.05     | 0.01     | 0.00    | 0.05     | 0.07     | 0.03     | 0.03    | 0.13     | 0.16     | 0.05     | 0.20     | 0.07     |
| GH31       | 0.90     | 1.47     | 0.77     | 1.26    | 1.44     | 0.69     | 0.98     | 0.87    | 1.50     | 1.40     | 0.58     | 1.46     | 0.84     |
| GT12       | 0.00     | 0.00     | 0.00     | 0.00    | 0.00     | 0.00     | 0.00     | 0.00    | 0.00     | 0.00     | 0.00     | 0.00     | 0.00     |
| CE1        | 0.46     | 0.57     | 0.30     | 0.36    | 0.65     | 0.32     | 0.43     | 0.43    | 0.70     | 0.53     | 0.28     | 0.45     | 0.35     |
| GH121      | 0.02     | 0.00     | 0.00     | 0.00    | 0.00     | 0.00     | 0.00     | 0.00    | 0.00     | 0.00     | 0.05     | 0.00     | 0.00     |
| GH79       | 0.00     | 0.00     | 0.00     | 0.00    | 0.00     | 0.00     | 0.00     | 0.00    | 0.01     | 0.00     | 0.00     | 0.00     | 0.00     |
| GT73       | 0.00     | 0.00     | 0.00     | 0.00    | 0.00     | 0.00     | 0.00     | 0.00    | 0.00     | 0.00     | 0.01     | 0.00     | 0.00     |
| GH77       | 0.55     | 0.65     | 0.65     | 0.48    | 0.67     | 0.62     | 0.71     | 0.91    | 1.15     | 0.79     | 0.43     | 0.68     | 0.61     |
| PL17       | 0.00     | 0.00     | 0.01     | 0.00    | 0.00     | 0.00     | 0.00     | 0.01    | 0.00     | 0.00     | 0.00     | 0.00     | 0.01     |
| PL8        | 0.24     | 0.41     | 0.12     | 0.30    | 0.43     | 0.51     | 0.24     | 0.13    | 0.06     | 0.18     | 0.06     | 0.59     | 0.18     |

| CAZY_group | AM-AD-87 | AM-AD-88 | AM-AD-89 | AM-AD-9 | AM-AD-90 | AM-AD-91 | AM-AD-92 | DA-AD-1 | DA-AD-10 | DA-AD-11 | DA-AD-12 | DA-AD-13 | DA-AD-14 |      |
|------------|----------|----------|----------|---------|----------|----------|----------|---------|----------|----------|----------|----------|----------|------|
| CE9        |          | 0.36     | 0.27     | 0.31    | 0.45     | 0.42     | 0.30     | 0.38    | 0.26     | 0.22     | 0.34     | 0.21     | 0.54     | 0.23 |
| CE15       |          | 0.01     | 0.05     | 0.00    | 0.00     | 0.03     | 0.00     | 0.02    | 0.00     | 0.00     | 0.03     | 0.02     | 0.00     | 0.01 |
| GT79       |          | 0.00     | 0.00     | 0.00    | 0.00     | 0.00     | 0.00     | 0.00    | 0.00     | 0.00     | 0.00     | 0.00     | 0.00     | 0.00 |
| GT10       |          | 0.00     | 0.00     | 0.00    | 0.00     | 0.01     | 0.00     | 0.01    | 0.00     | 0.00     | 0.00     | 0.01     | 0.00     | 0.01 |
| GH119      |          | 0.00     | 0.00     | 0.00    | 0.00     | 0.00     | 0.00     | 0.00    | 0.00     | 0.00     | 0.00     | 0.00     | 0.00     | 0.00 |
| GH16       |          | 0.18     | 0.20     | 0.21    | 0.33     | 0.22     | 0.23     | 0.24    | 0.15     | 0.19     | 0.18     | 0.10     | 0.28     | 0.18 |
| GH43       |          | 1.70     | 2.46     | 1.74    | 3.55     | 2.85     | 1.59     | 2.28    | 1.83     | 2.85     | 2.58     | 1.36     | 3.94     | 1.33 |
| GH51       |          | 0.56     | 0.81     | 0.47    | 0.84     | 0.80     | 0.71     | 0.65    | 0.63     | 0.80     | 0.66     | 0.29     | 0.87     | 0.48 |
| GT35       |          | 0.96     | 1.01     | 0.98    | 0.69     | 0.95     | 0.67     | 1.12    | 1.35     | 1.28     | 0.82     | 0.80     | 0.73     | 0.84 |
| GT25       |          | 0.00     | 0.00     | 0.00    | 0.00     | 0.00     | 0.00     | 0.00    | 0.00     | 0.03     | 0.00     | 0.00     | 0.03     | 0.00 |
| GT2        |          | 4.22     | 5.07     | 4.66    | 3.85     | 5.36     | 4.12     | 4.86    | 6.74     | 5.66     | 4.32     | 3.12     | 5.46     | 3.94 |
| GT51       |          | 1.08     | 1.17     | 0.93    | 1.05     | 1.18     | 0.97     | 1.05    | 1.16     | 1.06     | 1.24     | 0.72     | 1.15     | 0.84 |
| GH107      |          | 0.00     | 0.00     | 0.00    | 0.00     | 0.00     | 0.00     | 0.00    | 0.00     | 0.00     | 0.00     | 0.00     | 0.00     | 0.00 |
| GH7        |          | 0.00     | 0.00     | 0.00    | 0.00     | 0.00     | 0.00     | 0.00    | 0.00     | 0.00     | 0.00     | 0.00     | 0.00     | 0.00 |
| GT7        |          | 0.00     | 0.00     | 0.00    | 0.00     | 0.00     | 0.00     | 0.00    | 0.00     | 0.00     | 0.00     | 0.00     | 0.00     | 0.00 |
| GT36       |          | 0.00     | 0.00     | 0.00    | 0.00     | 0.00     | 0.00     | 0.00    | 0.00     | 0.00     | 0.00     | 0.00     | 0.00     | 0.00 |
| PL7        |          | 0.00     | 0.00     | 0.00    | 0.00     | 0.00     | 0.00     | 0.00    | 0.00     | 0.00     | 0.00     | 0.00     | 0.00     | 0.00 |
| GH110      |          | 0.06     | 0.12     | 0.11    | 0.12     | 0.22     | 0.16     | 0.08    | 0.15     | 0.10     | 0.11     | 0.09     | 0.31     | 0.15 |
| GT21       |          | 0.00     | 0.00     | 0.00    | 0.00     | 0.00     | 0.00     | 0.00    | 0.00     | 0.00     | 0.00     | 0.00     | 0.00     | 0.00 |
| GH62       |          | 0.00     | 0.00     | 0.00    | 0.00     | 0.01     | 0.00     | 0.00    | 0.00     | 0.00     | 0.00     | 0.00     | 0.00     | 0.00 |
| GH125      |          | 0.21     | 0.23     | 0.13    | 0.39     | 0.37     | 0.21     | 0.22    | 0.11     | 0.19     | 0.18     | 0.08     | 0.34     | 0.08 |
| GH117      |          | 0.08     | 0.08     | 0.02    | 0.09     | 0.19     | 0.16     | 0.14    | 0.06     | 0.13     | 0.08     | 0.02     | 0.14     | 0.05 |
| GH68       |          | 0.00     | 0.00     | 0.00    | 0.00     | 0.00     | 0.00     | 0.00    | 0.00     | 0.00     | 0.00     | 0.00     | 0.00     | 0.00 |
| GH85       |          | 0.02     | 0.11     | 0.02    | 0.03     | 0.06     | 0.00     | 0.01    | 0.03     | 0.03     | 0.03     | 0.00     | 0.03     | 0.00 |
| GH92       |          | 1.77     | 1.77     | 1.20    | 4.39     | 3.08     | 1.84     | 1.64    | 1.40     | 1.02     | 1.71     | 0.65     | 2.20     | 1.07 |
| GH40       |          | 0.00     | 0.00     | 0.00    | 0.00     | 0.00     | 0.00     | 0.00    | 0.00     | 0.00     | 0.00     | 0.00     | 0.00     | 0.00 |
| GT49       |          | 0.00     | 0.00     | 0.00    | 0.00     | 0.00     | 0.00     | 0.00    | 0.00     | 0.00     | 0.00     | 0.00     | 0.00     | 0.00 |
| GH112      |          | 0.26     | 0.23     | 0.24    | 0.12     | 0.18     | 0.28     | 0.19    | 0.19     | 0.26     | 0.13     | 0.12     | 0.25     | 0.09 |
| GT67       |          | 0.00     | 0.00     | 0.00    | 0.00     | 0.00     | 0.00     | 0.00    | 0.00     | 0.00     | 0.00     | 0.00     | 0.00     | 0.00 |
| CE8        |          | 0.15     | 0.33     | 0.28    | 0.33     | 0.28     | 0.23     | 0.20    | 0.22     | 0.19     | 0.26     | 0.13     | 0.39     | 0.15 |
| GT86       |          | 0.00     | 0.00     | 0.00    | 0.00     | 0.00     | 0.00     | 0.00    | 0.00     | 0.00     | 0.00     | 0.00     | 0.00     | 0.00 |
| GH101      |          | 0.02     | 0.00     | 0.02    | 0.00     | 0.05     | 0.05     | 0.00    | 0.00     | 0.00     | 0.00     | 0.00     | 0.00     | 0.00 |
| GH81       |          | 0.01     | 0.00     | 0.03    | 0.00     | 0.00     | 0.00     | 0.01    | 0.01     | 0.00     | 0.00     | 0.00     | 0.00     | 0.00 |
| GT93       |          | 0.00     | 0.00     | 0.00    | 0.00     | 0.00     | 0.00     | 0.00    | 0.00     | 0.00     | 0.00     | 0.00     | 0.00     | 0.00 |
| GT63       |          | 0.00     | 0.00     | 0.00    | 0.00     | 0.00     | 0.00     | 0.00    | 0.00     | 0.00     | 0.00     | 0.00     | 0.00     | 0.00 |
| CE11       |          | 0.26     | 0.29     | 0.16    | 0.33     | 0.36     | 0.30     | 0.25    | 0.23     | 0.16     | 0.29     | 0.18     | 0.14     | 0.21 |
| GT19       |          | 0.18     | 0.20     | 0.11    | 0.24     | 0.24     | 0.12     | 0.12    | 0.19     | 0.06     | 0.13     | 0.09     | 0.20     | 0.11 |
| GT33       |          | 0.00     | 0.00     | 0.00    | 0.00     | 0.00     | 0.00     | 0.00    | 0.00     | 0.00     | 0.00     | 0.00     | 0.00     | 0.00 |
| GH21       |          | 0.00     | 0.00     | 0.00    | 0.00     | 0.00     | 0.00     | 0.00    | 0.00     | 0.00     | 0.00     | 0.00     | 0.00     | 0.00 |
| GT68       |          | 0.00     | 0.00     | 0.00    | 0.00     | 0.00     | 0.00     | 0.00    | 0.00     | 0.00     | 0.00     | 0.00     | 0.00     | 0.00 |
| GH89       |          | 0.21     | 0.21     | 0.18    | 0.48     | 0.42     | 0.21     | 0.23    | 0.26     | 0.13     | 0.21     | 0.13     | 0.31     | 0.15 |
| GT82       |          | 0.00     | 0.00     | 0.00    | 0.00     | 0.00     | 0.00     | 0.00    | 0.00     | 0.00     | 0.00     | 0.00     | 0.00     | 0.01 |
| GH30       |          | 0.26     | 0.24     | 0.17    | 0.36     | 0.40     | 0.41     | 0.27    | 0.14     | 0.38     | 0.26     | 0.08     | 0.34     | 0.10 |
| GH20       |          | 1.16     | 1.20     | 0.91    | 1.92     | 2.06     | 1.38     | 1.25    | 1.07     | 0.64     | 0.97     | 0.67     | 2.20     | 0.82 |
| GH52       |          | 0.00     | 0.00     | 0.00    | 0.00     | 0.00     | 0.00     | 0.00    | 0.00     | 0.00     | 0.00     | 0.00     | 0.00     | 0.00 |
| GT84       |          | 0.01     | 0.00     | 0.08    | 0.00     | 0.00     | 0.00     | 0.04    | 0.08     | 0.00     | 0.05     | 0.03     | 0.00     | 0.07 |
| GT15       |          | 0.00     | 0.00     | 0.00    | 0.00     | 0.00     | 0.00     | 0.00    | 0.00     | 0.00     | 0.00     | 0.00     | 0.00     | 0.00 |
| GH93       |          | 0.02     | 0.00     | 0.00    | 0.03     | 0.00     | 0.00     | 0.01    | 0.00     | 0.00     | 0.00     | 0.00     | 0.00     | 0.00 |
| PL16       |          | 0.00     | 0.00     | 0.00    | 0.00     | 0.00     | 0.00     | 0.00    | 0.00     | 0.00     | 0.00     | 0.00     | 0.00     | 0.00 |
| GH26       |          | 0.14     | 0.24     | 0.11    | 0.06     | 0.12     | 0.09     | 0.15    | 0.03     | 0.35     | 0.03     | 0.10     | 0.17     | 0.10 |



| CAZY_group | AM-AD-87 | AM-AD-88 | AM-AD-89 | AM-AD-9 | AM-AD-90 | AM-AD-91 | AM-AD-92 | DA-AD-1 | DA-AD-10 | DA-AD-11 | DA-AD-12 | DA-AD-13 | DA-AD-14 |
|------------|----------|----------|----------|---------|----------|----------|----------|---------|----------|----------|----------|----------|----------|
| GT52       |          | 0.00     | 0.00     | 0.00    | 0.00     | 0.00     | 0.00     | 0.00    | 0.00     | 0.00     | 0.00     | 0.00     | 0.00     |
| GT64       |          | 0.00     | 0.00     | 0.00    | 0.00     | 0.00     | 0.00     | 0.00    | 0.00     | 0.00     | 0.00     | 0.00     | 0.00     |
| GT85       |          | 0.00     | 0.00     | 0.00    | 0.00     | 0.00     | 0.00     | 0.00    | 0.00     | 0.00     | 0.00     | 0.00     | 0.00     |
| GT16       |          | 0.00     | 0.00     | 0.00    | 0.00     | 0.00     | 0.00     | 0.00    | 0.00     | 0.00     | 0.00     | 0.00     | 0.00     |
| GH56       |          | 0.00     | 0.00     | 0.00    | 0.00     | 0.00     | 0.00     | 0.00    | 0.00     | 0.00     | 0.00     | 0.00     | 0.00     |
| GT60       |          | 0.00     | 0.00     | 0.00    | 0.00     | 0.00     | 0.00     | 0.00    | 0.00     | 0.00     | 0.00     | 0.00     | 0.00     |
| GH41       |          | 0.00     | 0.00     | 0.00    | 0.00     | 0.00     | 0.00     | 0.00    | 0.00     | 0.00     | 0.00     | 0.00     | 0.00     |
| CE7        |          | 0.15     | 0.11     | 0.07    | 0.18     | 0.17     | 0.09     | 0.14    | 0.12     | 0.10     | 0.08     | 0.05     | 0.11     |
| GH39       |          | 0.02     | 0.05     | 0.05    | 0.00     | 0.12     | 0.12     | 0.04    | 0.06     | 0.06     | 0.11     | 0.02     | 0.14     |
| GT30       |          | 0.32     | 0.36     | 0.19    | 0.51     | 0.34     | 0.37     | 0.28    | 0.30     | 0.19     | 0.26     | 0.18     | 0.34     |
| PL15       |          | 0.15     | 0.11     | 0.05    | 0.21     | 0.29     | 0.14     | 0.12    | 0.08     | 0.10     | 0.00     | 0.03     | 0.28     |
| GH102      |          | 0.00     | 0.00     | 0.02    | 0.00     | 0.01     | 0.00     | 0.00    | 0.07     | 0.00     | 0.03     | 0.01     | 0.00     |

| CAZY_group | DA-AD-15 | DA-AD-16 | DA-AD-17 | DA-AD-18 | DA-AD-19 | DA-AD-2 | DA-AD-20 | DA-AD-21 | DA-AD-22 | DA-AD-23 | DA-AD-24 | DA-AD-25 | DA-AD-26 |
|------------|----------|----------|----------|----------|----------|---------|----------|----------|----------|----------|----------|----------|----------|
| GH29       | 0.58     | 0.63     | 0.39     | 0.69     | 1.56     | 0.80    | 0.64     | 0.50     | 0.74     | 0.55     | 0.28     | 0.51     | 0.85     |
| PL4        | 0.00     | 0.00     | 0.00     | 0.00     | 0.00     | 0.00    | 0.01     | 0.00     | 0.00     | 0.00     | 0.00     | 0.00     | 0.00     |
| GH23       | 0.79     | 1.04     | 0.99     | 1.27     | 0.87     | 1.55    | 1.52     | 1.06     | 1.24     | 0.48     | 0.97     | 0.89     | 1.09     |
| CE6        | 0.02     | 0.00     | 0.01     | 0.00     | 0.12     | 0.03    | 0.02     | 0.01     | 0.01     | 0.00     | 0.08     | 0.00     | 0.04     |
| GH72       | 0.05     | 0.09     | 0.09     | 0.09     | 0.17     | 0.15    | 0.07     | 0.05     | 0.16     | 0.24     | 0.04     | 0.13     | 0.19     |
| GH114      | 0.00     | 0.00     | 0.00     | 0.00     | 0.00     | 0.00    | 0.00     | 0.00     | 0.00     | 0.00     | 0.00     | 0.00     | 0.00     |
| GH78       | 0.59     | 0.77     | 0.71     | 0.90     | 0.46     | 0.86    | 1.05     | 0.62     | 1.26     | 0.27     | 0.00     | 0.79     | 0.55     |
| PL19       | 0.00     | 0.00     | 0.00     | 0.00     | 0.00     | 0.00    | 0.00     | 0.00     | 0.00     | 0.00     | 0.00     | 0.00     | 0.00     |
| GT27       | 0.00     | 0.00     | 0.00     | 0.00     | 0.00     | 0.00    | 0.00     | 0.00     | 0.00     | 0.00     | 0.00     | 0.00     | 0.00     |
| GH5        | 0.51     | 0.63     | 0.39     | 0.93     | 0.58     | 0.38    | 0.52     | 0.25     | 0.55     | 0.58     | 0.77     | 0.87     | 0.48     |
| GT40       | 0.00     | 0.00     | 0.00     | 0.00     | 0.00     | 0.00    | 0.00     | 0.00     | 0.00     | 0.00     | 0.00     | 0.00     | 0.00     |
| CE13       | 0.00     | 0.00     | 0.00     | 0.00     | 0.00     | 0.00    | 0.00     | 0.00     | 0.00     | 0.00     | 0.00     | 0.00     | 0.00     |
| GT37       | 0.00     | 0.00     | 0.00     | 0.00     | 0.00     | 0.00    | 0.00     | 0.00     | 0.00     | 0.00     | 0.00     | 0.00     | 0.00     |
| GH33       | 0.17     | 0.09     | 0.20     | 0.18     | 0.12     | 0.33    | 0.29     | 0.09     | 0.23     | 0.14     | 0.04     | 0.11     | 0.19     |
| GT65       | 0.00     | 0.00     | 0.00     | 0.00     | 0.00     | 0.00    | 0.00     | 0.00     | 0.00     | 0.00     | 0.00     | 0.00     | 0.00     |
| GH86       | 0.00     | 0.00     | 0.00     | 0.00     | 0.00     | 0.00    | 0.00     | 0.00     | 0.00     | 0.00     | 0.00     | 0.00     | 0.01     |
| GH123      | 0.08     | 0.06     | 0.09     | 0.12     | 0.12     | 0.23    | 0.20     | 0.09     | 0.12     | 0.03     | 0.04     | 0.08     | 0.11     |
| GH96       | 0.00     | 0.00     | 0.00     | 0.00     | 0.00     | 0.00    | 0.00     | 0.00     | 0.00     | 0.00     | 0.00     | 0.00     | 0.00     |
| GH14       | 0.00     | 0.00     | 0.00     | 0.00     | 0.00     | 0.00    | 0.00     | 0.00     | 0.00     | 0.00     | 0.00     | 0.00     | 0.00     |
| CE3        | 0.00     | 0.00     | 0.00     | 0.00     | 0.00     | 0.00    | 0.00     | 0.00     | 0.00     | 0.00     | 0.00     | 0.00     | 0.00     |
| PL10       | 0.04     | 0.12     | 0.11     | 0.09     | 0.29     | 0.11    | 0.07     | 0.08     | 0.25     | 0.10     | 0.04     | 0.11     | 0.09     |
| GT48       | 0.00     | 0.00     | 0.00     | 0.00     | 0.00     | 0.00    | 0.00     | 0.00     | 0.00     | 0.00     | 0.00     | 0.00     | 0.00     |
| PL6        | 0.00     | 0.00     | 0.00     | 0.00     | 0.00     | 0.00    | 0.00     | 0.00     | 0.00     | 0.00     | 0.00     | 0.00     | 0.00     |
| GT83       | 0.03     | 0.15     | 0.11     | 0.00     | 0.12     | 0.07    | 0.05     | 0.13     | 0.17     | 0.00     | 0.00     | 0.06     | 0.10     |
| GH126      | 0.00     | 0.00     | 0.00     | 0.00     | 0.00     | 0.00    | 0.00     | 0.00     | 0.00     | 0.00     | 0.00     | 0.00     | 0.00     |
| GH9        | 0.22     | 0.33     | 0.10     | 0.45     | 0.00     | 0.29    | 0.25     | 0.12     | 0.22     | 0.17     | 0.40     | 0.40     | 0.12     |
| GH75       | 0.00     | 0.00     | 0.00     | 0.00     | 0.00     | 0.00    | 0.00     | 0.00     | 0.00     | 0.00     | 0.00     | 0.00     | 0.00     |
| GT71       | 0.00     | 0.00     | 0.00     | 0.00     | 0.00     | 0.00    | 0.00     | 0.00     | 0.00     | 0.00     | 0.00     | 0.00     | 0.00     |
| GH46       | 0.01     | 0.00     | 0.00     | 0.00     | 0.00     | 0.00    | 0.00     | 0.00     | 0.00     | 0.00     | 0.00     | 0.00     | 0.00     |
| GT61       | 0.00     | 0.00     | 0.00     | 0.00     | 0.00     | 0.00    | 0.00     | 0.00     | 0.00     | 0.00     | 0.00     | 0.00     | 0.00     |
| GT3        | 0.11     | 0.42     | 0.15     | 0.60     | 0.17     | 0.21    | 0.22     | 0.15     | 0.23     | 0.21     | 0.00     | 0.21     | 0.28     |
| PL3        | 0.00     | 0.00     | 0.00     | 0.00     | 0.00     | 0.00    | 0.00     | 0.00     | 0.00     | 0.00     | 0.00     | 0.00     | 0.00     |
| GH108      | 0.01     | 0.06     | 0.04     | 0.00     | 0.12     | 0.01    | 0.07     | 0.03     | 0.01     | 0.00     | 0.00     | 0.06     | 0.05     |
| GT56       | 0.01     | 0.00     | 0.00     | 0.00     | 0.00     | 0.00    | 0.00     | 0.00     | 0.00     | 0.00     | 0.00     | 0.00     | 0.01     |
| PL11       | 0.09     | 0.12     | 0.15     | 0.06     | 0.12     | 0.06    | 0.22     | 0.06     | 0.25     | 0.00     | 0.04     | 0.04     | 0.09     |
| GH45       | 0.00     | 0.00     | 0.00     | 0.00     | 0.06     | 0.00    | 0.00     | 0.00     | 0.00     | 0.00     | 0.00     | 0.00     | 0.00     |
| GT34       | 0.00     | 0.00     | 0.00     | 0.00     | 0.00     | 0.01    | 0.00     | 0.00     | 0.00     | 0.00     | 0.00     | 0.00     | 0.00     |
| PL14       | 0.00     | 0.00     | 0.00     | 0.00     | 0.00     | 0.00    | 0.00     | 0.00     | 0.00     | 0.00     | 0.00     | 0.00     | 0.00     |
| GH19       | 0.01     | 0.00     | 0.00     | 0.00     | 0.06     | 0.00    | 0.00     | 0.00     | 0.00     | 0.00     | 0.04     | 0.00     | 0.00     |
| GH118      | 0.00     | 0.00     | 0.00     | 0.00     | 0.00     | 0.00    | 0.00     | 0.00     | 0.00     | 0.00     | 0.00     | 0.00     | 0.00     |
| GH82       | 0.00     | 0.00     | 0.00     | 0.00     | 0.00     | 0.00    | 0.00     | 0.00     | 0.00     | 0.00     | 0.00     | 0.00     | 0.00     |
| GH76       | 0.12     | 0.18     | 0.18     | 0.06     | 0.06     | 0.16    | 0.27     | 0.14     | 0.31     | 0.00     | 0.00     | 0.08     | 0.09     |
| GT4        | 1.69     | 1.97     | 1.59     | 1.66     | 2.90     | 2.28    | 1.89     | 1.61     | 2.34     | 1.51     | 1.01     | 2.03     | 2.02     |
| GT87       | 0.00     | 0.00     | 0.01     | 0.00     | 0.00     | 0.00    | 0.00     | 0.00     | 0.00     | 0.00     | 0.00     | 0.00     | 0.01     |
| GH24       | 0.09     | 0.09     | 0.09     | 0.18     | 0.35     | 0.13    | 0.05     | 0.08     | 0.12     | 0.10     | 0.04     | 0.04     | 0.23     |
| GH90       | 0.00     | 0.00     | 0.00     | 0.00     | 0.00     | 0.00    | 0.00     | 0.00     | 0.00     | 0.00     | 0.00     | 0.00     | 0.00     |
| GH57       | 0.10     | 0.09     | 0.07     | 0.18     | 0.23     | 0.18    | 0.25     | 0.06     | 0.19     | 0.10     | 0.16     | 0.09     | 0.17     |
| GH36       | 0.67     | 1.07     | 0.80     | 1.03     | 0.81     | 0.76    | 0.93     | 0.56     | 0.76     | 1.06     | 0.60     | 0.62     | 0.70     |
| GT46       | 0.00     | 0.00     | 0.00     | 0.00     | 0.00     | 0.00    | 0.00     | 0.00     | 0.00     | 0.00     | 0.00     | 0.00     | 0.00     |
| GH66       | 0.01     | 0.03     | 0.05     | 0.03     | 0.00     | 0.05    | 0.02     | 0.00     | 0.06     | 0.00     | 0.04     | 0.04     | 0.03     |





| CAZY_group | DA-AD-15 | DA-AD-16 | DA-AD-17 | DA-AD-18 | DA-AD-19 | DA-AD-2 | DA-AD-20 | DA-AD-21 | DA-AD-22 | DA-AD-23 | DA-AD-24 | DA-AD-25 | DA-AD-26 |
|------------|----------|----------|----------|----------|----------|---------|----------|----------|----------|----------|----------|----------|----------|
| GT76       | 0.00     | 0.00     | 0.00     | 0.00     | 0.00     | 0.00    | 0.00     | 0.00     | 0.00     | 0.00     | 0.00     | 0.00     | 0.00     |
| GT32       | 0.09     | 0.09     | 0.09     | 0.09     | 0.00     | 0.06    | 0.16     | 0.07     | 0.02     | 0.09     | 0.17     | 0.04     | 0.08     |
| GT47       | 0.00     | 0.06     | 0.04     | 0.06     | 0.12     | 0.07    | 0.07     | 0.02     | 0.06     | 0.00     | 0.00     | 0.00     | 0.04     |
| GH84       | 0.08     | 0.18     | 0.11     | 0.12     | 0.17     | 0.05    | 0.10     | 0.05     | 0.12     | 0.10     | 0.00     | 0.13     | 0.18     |
| GH83       | 0.00     | 0.00     | 0.00     | 0.00     | 0.00     | 0.00    | 0.00     | 0.00     | 0.00     | 0.00     | 0.00     | 0.00     | 0.00     |
| GT59       | 0.00     | 0.00     | 0.00     | 0.00     | 0.00     | 0.00    | 0.00     | 0.00     | 0.00     | 0.00     | 0.00     | 0.00     | 0.00     |
| GH34       | 0.00     | 0.00     | 0.00     | 0.00     | 0.00     | 0.00    | 0.00     | 0.00     | 0.00     | 0.00     | 0.00     | 0.00     | 0.00     |
| GT14       | 0.04     | 0.06     | 0.03     | 0.03     | 0.00     | 0.08    | 0.10     | 0.01     | 0.01     | 0.00     | 0.04     | 0.02     | 0.07     |
| GH47       | 0.00     | 0.00     | 0.00     | 0.00     | 0.00     | 0.00    | 0.00     | 0.00     | 0.00     | 0.00     | 0.00     | 0.00     | 0.00     |
| GH97       | 0.56     | 1.04     | 0.79     | 1.54     | 0.87     | 0.92    | 1.01     | 0.82     | 0.97     | 0.48     | 0.24     | 0.87     | 0.96     |
| GH50       | 0.02     | 0.00     | 0.02     | 0.00     | 0.00     | 0.02    | 0.10     | 0.01     | 0.06     | 0.00     | 0.00     | 0.06     | 0.00     |
| GT26       | 0.23     | 0.30     | 0.16     | 0.15     | 0.46     | 0.09    | 0.07     | 0.17     | 0.25     | 0.14     | 0.44     | 0.15     | 0.19     |
| GH18       | 0.60     | 0.45     | 0.62     | 0.48     | 0.41     | 0.56    | 0.74     | 0.42     | 0.58     | 0.51     | 0.24     | 0.60     | 0.51     |
| GH37       | 0.04     | 0.00     | 0.00     | 0.00     | 0.00     | 0.02    | 0.00     | 0.00     | 0.00     | 0.00     | 0.00     | 0.00     | 0.02     |
| PL13       | 0.03     | 0.06     | 0.03     | 0.09     | 0.00     | 0.00    | 0.05     | 0.03     | 0.06     | 0.00     | 0.00     | 0.04     | 0.02     |
| GH27       | 0.24     | 0.24     | 0.22     | 0.27     | 0.23     | 0.22    | 0.17     | 0.20     | 0.26     | 0.24     | 0.20     | 0.24     | 0.17     |
| GT54       | 0.00     | 0.00     | 0.00     | 0.00     | 0.00     | 0.00    | 0.00     | 0.00     | 0.00     | 0.00     | 0.00     | 0.00     | 0.00     |
| GT91       | 0.00     | 0.00     | 0.00     | 0.00     | 0.00     | 0.00    | 0.00     | 0.00     | 0.00     | 0.00     | 0.00     | 0.00     | 0.00     |
| GT72       | 0.00     | 0.00     | 0.00     | 0.00     | 0.00     | 0.00    | 0.00     | 0.00     | 0.00     | 0.00     | 0.00     | 0.00     | 0.00     |
| GH67       | 0.07     | 0.03     | 0.04     | 0.12     | 0.12     | 0.02    | 0.07     | 0.03     | 0.06     | 0.03     | 0.00     | 0.04     | 0.02     |
| GH12       | 0.00     | 0.00     | 0.00     | 0.00     | 0.00     | 0.00    | 0.00     | 0.00     | 0.00     | 0.00     | 0.00     | 0.00     | 0.00     |
| GH91       | 0.03     | 0.00     | 0.00     | 0.00     | 0.00     | 0.01    | 0.07     | 0.00     | 0.03     | 0.00     | 0.00     | 0.00     | 0.05     |
| GT69       | 0.00     | 0.00     | 0.00     | 0.00     | 0.00     | 0.00    | 0.00     | 0.00     | 0.00     | 0.00     | 0.00     | 0.00     | 0.00     |
| GH106      | 0.15     | 0.36     | 0.23     | 0.24     | 0.35     | 0.34    | 0.25     | 0.17     | 0.17     | 0.21     | 0.00     | 0.06     | 0.16     |
| GT62       | 0.00     | 0.00     | 0.00     | 0.00     | 0.00     | 0.00    | 0.00     | 0.00     | 0.00     | 0.00     | 0.00     | 0.00     | 0.00     |
| GH17       | 0.00     | 0.00     | 0.00     | 0.00     | 0.00     | 0.00    | 0.00     | 0.00     | 0.00     | 0.00     | 0.00     | 0.00     | 0.00     |
| GH88       | 0.21     | 0.27     | 0.37     | 0.48     | 0.17     | 0.37    | 0.27     | 0.23     | 0.36     | 0.00     | 0.04     | 0.32     | 0.29     |
| CE5        | 0.00     | 0.00     | 0.00     | 0.00     | 0.00     | 0.00    | 0.00     | 0.00     | 0.00     | 0.00     | 0.00     | 0.00     | 0.00     |
| GT8        | 0.13     | 0.03     | 0.11     | 0.15     | 0.06     | 0.16    | 0.05     | 0.02     | 0.15     | 0.03     | 0.16     | 0.04     | 0.14     |
| GT50       | 0.00     | 0.00     | 0.00     | 0.00     | 0.00     | 0.00    | 0.00     | 0.00     | 0.00     | 0.00     | 0.00     | 0.00     | 0.00     |
| GT20       | 0.09     | 0.18     | 0.05     | 0.06     | 0.06     | 0.17    | 0.07     | 0.07     | 0.10     | 0.00     | 0.00     | 0.06     | 0.06     |
| PL9        | 0.09     | 0.06     | 0.09     | 0.12     | 0.06     | 0.02    | 0.15     | 0.06     | 0.12     | 0.03     | 0.00     | 0.13     | 0.04     |
| GH55       | 0.03     | 0.09     | 0.04     | 0.09     | 0.06     | 0.02    | 0.02     | 0.01     | 0.04     | 0.00     | 0.00     | 0.04     | 0.03     |
| GH64       | 0.00     | 0.00     | 0.00     | 0.00     | 0.00     | 0.00    | 0.00     | 0.00     | 0.00     | 0.00     | 0.00     | 0.00     | 0.00     |
| GH127      | 0.30     | 0.30     | 0.35     | 0.42     | 0.29     | 0.26    | 0.27     | 0.39     | 0.47     | 0.10     | 0.24     | 0.15     | 0.32     |
| GH103      | 0.00     | 0.00     | 0.00     | 0.03     | 0.00     | 0.01    | 0.00     | 0.01     | 0.00     | 0.00     | 0.00     | 0.00     | 0.02     |
| GH3        | 2.12     | 2.95     | 2.74     | 3.47     | 2.32     | 2.26    | 2.70     | 2.15     | 3.30     | 1.85     | 1.85     | 2.99     | 1.92     |
| GT45       | 0.00     | 0.00     | 0.00     | 0.00     | 0.00     | 0.00    | 0.00     | 0.00     | 0.00     | 0.00     | 0.00     | 0.00     | 0.00     |
| GT74       | 0.00     | 0.00     | 0.00     | 0.00     | 0.00     | 0.00    | 0.00     | 0.00     | 0.00     | 0.00     | 0.00     | 0.00     | 0.00     |
| GT90       | 0.00     | 0.00     | 0.00     | 0.00     | 0.00     | 0.02    | 0.00     | 0.00     | 0.00     | 0.00     | 0.00     | 0.00     | 0.00     |
| GH116      | 0.07     | 0.12     | 0.09     | 0.09     | 0.12     | 0.14    | 0.02     | 0.04     | 0.09     | 0.00     | 0.00     | 0.02     | 0.10     |
| GH31       | 0.92     | 1.25     | 0.99     | 1.27     | 0.87     | 0.98    | 1.15     | 0.88     | 1.12     | 0.51     | 0.69     | 1.37     | 0.94     |
| GT12       | 0.00     | 0.00     | 0.00     | 0.00     | 0.00     | 0.00    | 0.00     | 0.00     | 0.00     | 0.00     | 0.00     | 0.00     | 0.00     |
| CE1        | 0.44     | 0.57     | 0.42     | 0.54     | 0.35     | 0.30    | 0.47     | 0.31     | 0.52     | 0.27     | 0.16     | 0.51     | 0.29     |
| GH121      | 0.00     | 0.00     | 0.00     | 0.00     | 0.00     | 0.01    | 0.00     | 0.00     | 0.00     | 0.00     | 0.00     | 0.00     | 0.00     |
| GH79       | 0.01     | 0.06     | 0.00     | 0.03     | 0.00     | 0.01    | 0.00     | 0.01     | 0.01     | 0.00     | 0.00     | 0.02     | 0.01     |
| GT73       | 0.00     | 0.00     | 0.00     | 0.00     | 0.00     | 0.00    | 0.00     | 0.00     | 0.00     | 0.00     | 0.00     | 0.00     | 0.00     |
| GH77       | 0.50     | 0.83     | 0.58     | 0.84     | 0.64     | 0.69    | 0.69     | 0.51     | 0.60     | 0.75     | 0.64     | 0.62     | 0.57     |
| PL17       | 0.00     | 0.00     | 0.00     | 0.00     | 0.06     | 0.00    | 0.00     | 0.00     | 0.00     | 0.00     | 0.00     | 0.00     | 0.00     |
| PL8        | 0.20     | 0.18     | 0.21     | 0.24     | 0.12     | 0.32    | 0.17     | 0.15     | 0.17     | 0.00     | 0.00     | 0.19     | 0.29     |

| CAZY_group | DA-AD-15 | DA-AD-16 | DA-AD-17 | DA-AD-18 | DA-AD-19 | DA-AD-2 | DA-AD-20 | DA-AD-21 | DA-AD-22 | DA-AD-23 | DA-AD-24 | DA-AD-25 | DA-AD-26 |
|------------|----------|----------|----------|----------|----------|---------|----------|----------|----------|----------|----------|----------|----------|
| CE9        | 0.30     | 0.30     | 0.33     | 0.24     | 0.12     | 0.40    | 0.44     | 0.21     | 0.42     | 0.24     | 0.24     | 0.17     | 0.33     |
| CE15       | 0.03     | 0.06     | 0.00     | 0.00     | 0.00     | 0.00    | 0.03     | 0.00     | 0.01     | 0.00     | 0.00     | 0.00     | 0.01     |
| GT79       | 0.00     | 0.00     | 0.00     | 0.00     | 0.00     | 0.00    | 0.00     | 0.00     | 0.00     | 0.00     | 0.00     | 0.00     | 0.00     |
| GT10       | 0.00     | 0.00     | 0.01     | 0.00     | 0.00     | 0.01    | 0.00     | 0.00     | 0.02     | 0.00     | 0.00     | 0.00     | 0.03     |
| GH119      | 0.00     | 0.00     | 0.00     | 0.00     | 0.00     | 0.00    | 0.00     | 0.00     | 0.00     | 0.00     | 0.00     | 0.00     | 0.00     |
| GH16       | 0.15     | 0.18     | 0.11     | 0.21     | 0.12     | 0.24    | 0.15     | 0.17     | 0.28     | 0.17     | 0.04     | 0.17     | 0.25     |
| GH43       | 1.51     | 2.29     | 1.59     | 2.23     | 2.84     | 2.08    | 1.69     | 1.79     | 2.54     | 0.92     | 0.69     | 1.85     | 1.67     |
| GH51       | 0.48     | 0.57     | 0.56     | 0.57     | 0.64     | 0.46    | 0.59     | 0.53     | 0.73     | 0.21     | 0.48     | 0.45     | 0.46     |
| GT35       | 0.79     | 0.86     | 0.66     | 0.93     | 0.41     | 0.99    | 0.96     | 0.64     | 0.96     | 1.16     | 0.97     | 1.05     | 0.72     |
| GT25       | 0.00     | 0.00     | 0.01     | 0.00     | 0.00     | 0.01    | 0.00     | 0.00     | 0.00     | 0.00     | 0.00     | 0.00     | 0.01     |
| GT2        | 3.75     | 4.85     | 4.33     | 4.80     | 5.27     | 5.23    | 4.56     | 3.87     | 5.03     | 3.66     | 3.79     | 4.78     | 4.08     |
| GT51       | 0.73     | 0.80     | 0.83     | 0.81     | 1.16     | 0.93    | 0.76     | 0.90     | 1.06     | 0.92     | 0.77     | 0.70     | 0.95     |
| GH107      | 0.00     | 0.00     | 0.00     | 0.00     | 0.00     | 0.00    | 0.00     | 0.00     | 0.00     | 0.00     | 0.00     | 0.00     | 0.00     |
| GH7        | 0.00     | 0.00     | 0.00     | 0.00     | 0.00     | 0.00    | 0.00     | 0.00     | 0.00     | 0.00     | 0.00     | 0.00     | 0.00     |
| GT7        | 0.00     | 0.00     | 0.00     | 0.00     | 0.00     | 0.00    | 0.00     | 0.00     | 0.00     | 0.00     | 0.00     | 0.00     | 0.00     |
| GT36       | 0.00     | 0.00     | 0.00     | 0.00     | 0.00     | 0.00    | 0.00     | 0.00     | 0.00     | 0.00     | 0.00     | 0.00     | 0.00     |
| PL7        | 0.00     | 0.00     | 0.00     | 0.00     | 0.00     | 0.00    | 0.00     | 0.00     | 0.01     | 0.00     | 0.00     | 0.00     | 0.00     |
| GH110      | 0.12     | 0.09     | 0.11     | 0.06     | 0.23     | 0.15    | 0.10     | 0.07     | 0.12     | 0.10     | 0.04     | 0.08     | 0.11     |
| GT21       | 0.00     | 0.00     | 0.00     | 0.00     | 0.00     | 0.00    | 0.00     | 0.00     | 0.00     | 0.00     | 0.00     | 0.00     | 0.00     |
| GH62       | 0.00     | 0.00     | 0.00     | 0.00     | 0.00     | 0.00    | 0.00     | 0.00     | 0.00     | 0.00     | 0.00     | 0.00     | 0.00     |
| GH125      | 0.11     | 0.21     | 0.18     | 0.18     | 0.00     | 0.24    | 0.37     | 0.15     | 0.22     | 0.03     | 0.08     | 0.11     | 0.14     |
| GH117      | 0.06     | 0.12     | 0.09     | 0.03     | 0.12     | 0.07    | 0.17     | 0.03     | 0.12     | 0.00     | 0.00     | 0.08     | 0.06     |
| GH68       | 0.00     | 0.00     | 0.00     | 0.00     | 0.00     | 0.00    | 0.00     | 0.00     | 0.00     | 0.00     | 0.00     | 0.00     | 0.00     |
| GH85       | 0.01     | 0.03     | 0.02     | 0.00     | 0.00     | 0.03    | 0.00     | 0.00     | 0.00     | 0.00     | 0.04     | 0.00     | 0.01     |
| GH92       | 1.27     | 1.64     | 1.48     | 1.51     | 1.68     | 1.63    | 1.74     | 1.69     | 2.15     | 0.58     | 0.48     | 1.49     | 1.49     |
| GH40       | 0.00     | 0.00     | 0.00     | 0.00     | 0.00     | 0.00    | 0.00     | 0.00     | 0.00     | 0.00     | 0.00     | 0.00     | 0.00     |
| GT49       | 0.00     | 0.00     | 0.00     | 0.00     | 0.00     | 0.00    | 0.00     | 0.00     | 0.00     | 0.00     | 0.00     | 0.00     | 0.00     |
| GH112      | 0.15     | 0.09     | 0.22     | 0.09     | 0.00     | 0.21    | 0.20     | 0.07     | 0.23     | 0.24     | 0.24     | 0.19     | 0.08     |
| GT67       | 0.00     | 0.00     | 0.00     | 0.00     | 0.00     | 0.00    | 0.00     | 0.00     | 0.00     | 0.00     | 0.00     | 0.00     | 0.00     |
| CE8        | 0.19     | 0.24     | 0.15     | 0.30     | 0.52     | 0.13    | 0.10     | 0.15     | 0.35     | 0.14     | 0.08     | 0.21     | 0.18     |
| GT86       | 0.00     | 0.00     | 0.00     | 0.00     | 0.00     | 0.00    | 0.00     | 0.00     | 0.00     | 0.00     | 0.00     | 0.00     | 0.00     |
| GH101      | 0.00     | 0.00     | 0.03     | 0.00     | 0.00     | 0.00    | 0.00     | 0.00     | 0.00     | 0.00     | 0.00     | 0.02     | 0.00     |
| GH81       | 0.00     | 0.00     | 0.00     | 0.00     | 0.00     | 0.00    | 0.00     | 0.00     | 0.01     | 0.00     | 0.00     | 0.00     | 0.00     |
| GT93       | 0.00     | 0.00     | 0.00     | 0.00     | 0.00     | 0.00    | 0.00     | 0.00     | 0.00     | 0.00     | 0.00     | 0.00     | 0.00     |
| GT63       | 0.00     | 0.00     | 0.00     | 0.00     | 0.00     | 0.00    | 0.00     | 0.00     | 0.00     | 0.00     | 0.00     | 0.00     | 0.00     |
| CE11       | 0.19     | 0.24     | 0.19     | 0.24     | 0.46     | 0.20    | 0.32     | 0.21     | 0.26     | 0.17     | 0.20     | 0.19     | 0.26     |
| GT19       | 0.09     | 0.21     | 0.14     | 0.18     | 0.52     | 0.24    | 0.20     | 0.10     | 0.09     | 0.10     | 0.16     | 0.11     | 0.18     |
| GT33       | 0.00     | 0.00     | 0.00     | 0.00     | 0.00     | 0.00    | 0.00     | 0.00     | 0.00     | 0.00     | 0.00     | 0.00     | 0.00     |
| GH21       | 0.00     | 0.00     | 0.00     | 0.00     | 0.00     | 0.00    | 0.00     | 0.00     | 0.00     | 0.00     | 0.00     | 0.00     | 0.00     |
| GT68       | 0.00     | 0.00     | 0.00     | 0.00     | 0.00     | 0.00    | 0.00     | 0.00     | 0.00     | 0.00     | 0.00     | 0.00     | 0.00     |
| GH89       | 0.16     | 0.21     | 0.21     | 0.12     | 0.35     | 0.24    | 0.15     | 0.12     | 0.23     | 0.21     | 0.08     | 0.11     | 0.18     |
| GT82       | 0.00     | 0.00     | 0.00     | 0.00     | 0.00     | 0.00    | 0.00     | 0.00     | 0.00     | 0.00     | 0.00     | 0.00     | 0.00     |
| GH30       | 0.17     | 0.27     | 0.20     | 0.18     | 0.23     | 0.22    | 0.27     | 0.22     | 0.29     | 0.07     | 0.08     | 0.23     | 0.25     |
| GH20       | 0.74     | 1.31     | 1.02     | 0.75     | 1.33     | 1.36    | 1.08     | 0.87     | 1.21     | 0.82     | 0.60     | 0.62     | 1.15     |
| GH52       | 0.00     | 0.00     | 0.00     | 0.00     | 0.00     | 0.00    | 0.00     | 0.00     | 0.00     | 0.00     | 0.00     | 0.00     | 0.00     |
| GT84       | 0.02     | 0.00     | 0.04     | 0.00     | 0.00     | 0.08    | 0.00     | 0.00     | 0.03     | 0.00     | 0.00     | 0.00     | 0.00     |
| GT15       | 0.00     | 0.00     | 0.00     | 0.00     | 0.00     | 0.00    | 0.00     | 0.00     | 0.00     | 0.00     | 0.00     | 0.00     | 0.00     |
| GH93       | 0.02     | 0.00     | 0.01     | 0.00     | 0.00     | 0.01    | 0.00     | 0.00     | 0.00     | 0.00     | 0.00     | 0.00     | 0.00     |
| PL16       | 0.00     | 0.00     | 0.00     | 0.00     | 0.00     | 0.00    | 0.00     | 0.00     | 0.00     | 0.00     | 0.00     | 0.00     | 0.00     |
| GH26       | 0.18     | 0.33     | 0.12     | 0.15     | 0.00     | 0.11    | 0.20     | 0.10     | 0.15     | 0.17     | 0.16     | 0.28     | 0.16     |



| CAZY_group | DA-AD-15 | DA-AD-16 | DA-AD-17 | DA-AD-18 | DA-AD-19 | DA-AD-2 | DA-AD-20 | DA-AD-21 | DA-AD-22 | DA-AD-23 | DA-AD-24 | DA-AD-25 | DA-AD-26 |
|------------|----------|----------|----------|----------|----------|---------|----------|----------|----------|----------|----------|----------|----------|
| GT52       |          | 0.00     | 0.00     | 0.00     | 0.00     | 0.00    | 0.00     | 0.00     | 0.00     | 0.00     | 0.00     | 0.00     | 0.00     |
| GT64       |          | 0.00     | 0.00     | 0.00     | 0.00     | 0.00    | 0.00     | 0.00     | 0.00     | 0.00     | 0.00     | 0.00     | 0.00     |
| GT85       |          | 0.00     | 0.00     | 0.00     | 0.00     | 0.00    | 0.00     | 0.00     | 0.00     | 0.00     | 0.00     | 0.00     | 0.00     |
| GT16       |          | 0.00     | 0.00     | 0.00     | 0.00     | 0.00    | 0.00     | 0.00     | 0.00     | 0.00     | 0.00     | 0.00     | 0.00     |
| GH56       |          | 0.00     | 0.00     | 0.00     | 0.00     | 0.00    | 0.00     | 0.00     | 0.00     | 0.00     | 0.00     | 0.00     | 0.00     |
| GT60       |          | 0.00     | 0.00     | 0.00     | 0.00     | 0.00    | 0.00     | 0.00     | 0.00     | 0.00     | 0.00     | 0.00     | 0.00     |
| GH41       |          | 0.00     | 0.00     | 0.00     | 0.00     | 0.00    | 0.00     | 0.00     | 0.00     | 0.00     | 0.00     | 0.00     | 0.00     |
| CE7        |          | 0.04     | 0.15     | 0.05     | 0.06     | 0.35    | 0.13     | 0.20     | 0.03     | 0.25     | 0.03     | 0.08     | 0.11     |
| GH39       |          | 0.03     | 0.09     | 0.04     | 0.09     | 0.00    | 0.01     | 0.10     | 0.02     | 0.04     | 0.00     | 0.08     | 0.08     |
| GT30       |          | 0.23     | 0.24     | 0.23     | 0.30     | 0.41    | 0.26     | 0.34     | 0.22     | 0.22     | 0.14     | 0.04     | 0.23     |
| PL15       |          | 0.06     | 0.09     | 0.05     | 0.30     | 0.00    | 0.05     | 0.17     | 0.05     | 0.04     | 0.00     | 0.00     | 0.04     |
| GH102      |          | 0.03     | 0.00     | 0.03     | 0.00     | 0.06    | 0.03     | 0.02     | 0.01     | 0.03     | 0.00     | 0.00     | 0.00     |

| CAZY_group | DA-AD-27 | DA-AD-28 | DA-AD-29 | DA-AD-3 | DA-AD-30 | DA-AD-31 | DA-AD-32 | DA-AD-33 | DA-AD-34 | DA-AD-35 | DA-AD-36 | DA-AD-37 | DA-AD-38 |      |
|------------|----------|----------|----------|---------|----------|----------|----------|----------|----------|----------|----------|----------|----------|------|
| GH29       | 0.42     | 1.03     | 0.70     | 0.60    | 0.60     | 0.47     | 0.45     | 0.55     | 0.49     | 0.61     | 0.50     | 0.64     | 0.48     | 0.66 |
| PL4        | 0.00     | 0.00     | 0.00     | 0.00    | 0.00     | 0.00     | 0.00     | 0.00     | 0.00     | 0.00     | 0.00     | 0.00     | 0.00     | 0.00 |
| GH23       | 1.00     | 1.39     | 0.92     | 1.40    | 0.66     | 1.06     | 0.96     | 0.96     | 0.86     | 0.83     | 1.01     | 0.90     | 0.88     | 0.88 |
| CE6        | 0.03     | 0.00     | 0.00     | 0.02    | 0.04     | 0.00     | 0.00     | 0.01     | 0.00     | 0.01     | 0.01     | 0.01     | 0.01     | 0.05 |
| GH72       | 0.09     | 0.15     | 0.12     | 0.18    | 0.18     | 0.15     | 0.07     | 0.14     | 0.14     | 0.07     | 0.10     | 0.12     | 0.12     | 0.12 |
| GH114      | 0.00     | 0.00     | 0.00     | 0.00    | 0.00     | 0.00     | 0.00     | 0.00     | 0.00     | 0.00     | 0.00     | 0.00     | 0.00     | 0.00 |
| GH78       | 0.39     | 1.03     | 0.57     | 0.79    | 0.26     | 0.59     | 0.54     | 0.46     | 0.72     | 0.55     | 0.69     | 0.60     | 0.97     | 0.97 |
| PL19       | 0.00     | 0.00     | 0.00     | 0.00    | 0.00     | 0.00     | 0.00     | 0.00     | 0.00     | 0.00     | 0.00     | 0.00     | 0.00     | 0.00 |
| GT27       | 0.00     | 0.00     | 0.00     | 0.00    | 0.00     | 0.00     | 0.00     | 0.00     | 0.00     | 0.00     | 0.00     | 0.00     | 0.00     | 0.00 |
| GH5        | 0.48     | 0.83     | 0.37     | 0.30    | 0.56     | 0.59     | 0.49     | 0.25     | 0.62     | 0.64     | 0.18     | 0.35     | 0.56     | 0.56 |
| GT40       | 0.00     | 0.00     | 0.00     | 0.00    | 0.00     | 0.00     | 0.00     | 0.00     | 0.00     | 0.00     | 0.00     | 0.00     | 0.00     | 0.00 |
| CE13       | 0.00     | 0.00     | 0.00     | 0.00    | 0.00     | 0.00     | 0.00     | 0.00     | 0.00     | 0.00     | 0.00     | 0.00     | 0.00     | 0.00 |
| GT37       | 0.00     | 0.00     | 0.00     | 0.00    | 0.00     | 0.00     | 0.00     | 0.00     | 0.00     | 0.00     | 0.00     | 0.00     | 0.00     | 0.00 |
| GH33       | 0.10     | 0.31     | 0.09     | 0.18    | 0.09     | 0.21     | 0.11     | 0.11     | 0.15     | 0.15     | 0.23     | 0.16     | 0.24     | 0.24 |
| GT65       | 0.00     | 0.00     | 0.00     | 0.00    | 0.00     | 0.00     | 0.00     | 0.00     | 0.00     | 0.00     | 0.00     | 0.00     | 0.00     | 0.00 |
| GH86       | 0.00     | 0.00     | 0.01     | 0.00    | 0.00     | 0.00     | 0.00     | 0.00     | 0.01     | 0.00     | 0.00     | 0.00     | 0.00     | 0.00 |
| GH123      | 0.04     | 0.15     | 0.07     | 0.10    | 0.09     | 0.09     | 0.04     | 0.05     | 0.11     | 0.09     | 0.08     | 0.11     | 0.14     | 0.14 |
| GH96       | 0.00     | 0.00     | 0.00     | 0.00    | 0.00     | 0.00     | 0.00     | 0.00     | 0.00     | 0.00     | 0.00     | 0.00     | 0.00     | 0.00 |
| GH14       | 0.00     | 0.00     | 0.00     | 0.00    | 0.00     | 0.00     | 0.00     | 0.00     | 0.00     | 0.01     | 0.00     | 0.00     | 0.00     | 0.00 |
| CE3        | 0.00     | 0.00     | 0.00     | 0.00    | 0.01     | 0.00     | 0.00     | 0.00     | 0.00     | 0.00     | 0.00     | 0.00     | 0.00     | 0.00 |
| PL10       | 0.04     | 0.15     | 0.11     | 0.07    | 0.07     | 0.02     | 0.07     | 0.08     | 0.07     | 0.09     | 0.05     | 0.10     | 0.12     | 0.12 |
| GT48       | 0.00     | 0.00     | 0.00     | 0.00    | 0.00     | 0.00     | 0.00     | 0.00     | 0.00     | 0.00     | 0.00     | 0.00     | 0.00     | 0.00 |
| PL6        | 0.00     | 0.00     | 0.00     | 0.00    | 0.00     | 0.00     | 0.00     | 0.00     | 0.00     | 0.01     | 0.00     | 0.00     | 0.00     | 0.00 |
| GT83       | 0.06     | 0.05     | 0.07     | 0.09    | 0.03     | 0.04     | 0.04     | 0.08     | 0.08     | 0.09     | 0.12     | 0.07     | 0.12     | 0.12 |
| GH126      | 0.00     | 0.00     | 0.00     | 0.00    | 0.00     | 0.00     | 0.00     | 0.00     | 0.00     | 0.00     | 0.00     | 0.00     | 0.00     | 0.00 |
| GH9        | 0.31     | 0.52     | 0.24     | 0.11    | 0.16     | 0.19     | 0.33     | 0.11     | 0.29     | 0.20     | 0.09     | 0.29     | 0.12     | 0.12 |
| GH75       | 0.00     | 0.00     | 0.00     | 0.00    | 0.00     | 0.00     | 0.00     | 0.00     | 0.00     | 0.00     | 0.00     | 0.00     | 0.00     | 0.00 |
| GT71       | 0.00     | 0.00     | 0.00     | 0.00    | 0.00     | 0.00     | 0.00     | 0.00     | 0.00     | 0.00     | 0.00     | 0.00     | 0.00     | 0.00 |
| GH46       | 0.00     | 0.00     | 0.00     | 0.00    | 0.00     | 0.00     | 0.00     | 0.00     | 0.00     | 0.00     | 0.00     | 0.00     | 0.00     | 0.00 |
| GT61       | 0.00     | 0.00     | 0.00     | 0.00    | 0.00     | 0.00     | 0.00     | 0.00     | 0.00     | 0.00     | 0.00     | 0.00     | 0.00     | 0.00 |
| GT3        | 0.16     | 0.31     | 0.24     | 0.22    | 0.14     | 0.21     | 0.13     | 0.11     | 0.11     | 0.23     | 0.20     | 0.14     | 0.19     | 0.19 |
| PL3        | 0.00     | 0.00     | 0.00     | 0.00    | 0.00     | 0.00     | 0.00     | 0.00     | 0.00     | 0.01     | 0.00     | 0.00     | 0.00     | 0.00 |
| GH108      | 0.09     | 0.10     | 0.05     | 0.01    | 0.00     | 0.02     | 0.05     | 0.08     | 0.03     | 0.01     | 0.04     | 0.05     | 0.04     | 0.04 |
| GT56       | 0.00     | 0.00     | 0.01     | 0.01    | 0.00     | 0.00     | 0.00     | 0.00     | 0.00     | 0.00     | 0.00     | 0.00     | 0.00     | 0.00 |
| PL11       | 0.04     | 0.21     | 0.07     | 0.04    | 0.00     | 0.13     | 0.05     | 0.11     | 0.15     | 0.13     | 0.15     | 0.07     | 0.24     | 0.24 |
| GH45       | 0.00     | 0.00     | 0.00     | 0.00    | 0.00     | 0.00     | 0.00     | 0.00     | 0.01     | 0.00     | 0.00     | 0.01     | 0.00     | 0.00 |
| GT34       | 0.00     | 0.00     | 0.00     | 0.00    | 0.00     | 0.00     | 0.00     | 0.00     | 0.00     | 0.01     | 0.00     | 0.00     | 0.00     | 0.00 |
| PL14       | 0.00     | 0.00     | 0.00     | 0.00    | 0.00     | 0.00     | 0.00     | 0.00     | 0.00     | 0.00     | 0.00     | 0.00     | 0.00     | 0.00 |
| GH19       | 0.00     | 0.00     | 0.01     | 0.00    | 0.00     | 0.00     | 0.00     | 0.00     | 0.00     | 0.00     | 0.00     | 0.01     | 0.00     | 0.00 |
| GH118      | 0.00     | 0.00     | 0.00     | 0.00    | 0.00     | 0.00     | 0.00     | 0.00     | 0.00     | 0.00     | 0.00     | 0.00     | 0.00     | 0.00 |
| GH82       | 0.00     | 0.00     | 0.00     | 0.00    | 0.00     | 0.00     | 0.00     | 0.00     | 0.00     | 0.00     | 0.00     | 0.00     | 0.00     | 0.00 |
| GH76       | 0.12     | 0.41     | 0.07     | 0.00    | 0.03     | 0.06     | 0.12     | 0.00     | 0.17     | 0.22     | 0.12     | 0.20     | 0.31     | 0.31 |
| GT4        | 1.60     | 2.74     | 1.52     | 1.51    | 1.23     | 1.87     | 1.73     | 1.89     | 2.09     | 1.62     | 1.40     | 1.52     | 2.20     | 2.20 |
| GT87       | 0.01     | 0.00     | 0.00     | 0.01    | 0.00     | 0.00     | 0.00     | 0.00     | 0.00     | 0.00     | 0.00     | 0.00     | 0.00     | 0.00 |
| GH24       | 0.06     | 0.10     | 0.09     | 0.06    | 0.09     | 0.11     | 0.07     | 0.14     | 0.06     | 0.03     | 0.06     | 0.10     | 0.04     | 0.04 |
| GH90       | 0.00     | 0.00     | 0.00     | 0.00    | 0.00     | 0.00     | 0.00     | 0.00     | 0.00     | 0.00     | 0.00     | 0.00     | 0.00     | 0.00 |
| GH57       | 0.10     | 0.05     | 0.16     | 0.10    | 0.09     | 0.11     | 0.09     | 0.25     | 0.07     | 0.08     | 0.13     | 0.10     | 0.10     | 0.10 |
| GH36       | 0.61     | 1.14     | 0.57     | 0.72    | 0.77     | 0.72     | 0.65     | 1.07     | 0.70     | 0.74     | 0.72     | 0.53     | 0.56     | 0.56 |
| GT46       | 0.00     | 0.00     | 0.00     | 0.00    | 0.00     | 0.00     | 0.00     | 0.00     | 0.00     | 0.00     | 0.00     | 0.00     | 0.00     | 0.00 |
| GH66       | 0.00     | 0.05     | 0.02     | 0.02    | 0.00     | 0.00     | 0.00     | 0.01     | 0.00     | 0.02     | 0.05     | 0.04     | 0.05     | 0.06 |



| CAZY_group | DA-AD-27 | DA-AD-28 | DA-AD-29 | DA-AD-3 | DA-AD-30 | DA-AD-31 | DA-AD-32 | DA-AD-33 | DA-AD-34 | DA-AD-35 | DA-AD-36 | DA-AD-37 | DA-AD-38 |
|------------|----------|----------|----------|---------|----------|----------|----------|----------|----------|----------|----------|----------|----------|
| GT76       | 0.00     | 0.00     | 0.00     | 0.00    | 0.00     | 0.00     | 0.00     | 0.00     | 0.00     | 0.00     | 0.00     | 0.00     | 0.00     |
| GT32       | 0.09     | 0.05     | 0.05     | 0.05    | 0.05     | 0.05     | 0.09     | 0.12     | 0.08     | 0.13     | 0.07     | 0.06     | 0.05     |
| GT47       | 0.01     | 0.00     | 0.01     | 0.12    | 0.04     | 0.04     | 0.04     | 0.03     | 0.05     | 0.04     | 0.05     | 0.05     | 0.05     |
| GH84       | 0.09     | 0.21     | 0.11     | 0.10    | 0.07     | 0.08     | 0.05     | 0.08     | 0.11     | 0.02     | 0.08     | 0.07     | 0.08     |
| GH83       | 0.00     | 0.00     | 0.00     | 0.00    | 0.00     | 0.00     | 0.00     | 0.00     | 0.00     | 0.00     | 0.00     | 0.00     | 0.00     |
| GT59       | 0.00     | 0.00     | 0.00     | 0.00    | 0.00     | 0.00     | 0.00     | 0.00     | 0.00     | 0.00     | 0.00     | 0.00     | 0.00     |
| GH34       | 0.00     | 0.00     | 0.00     | 0.00    | 0.00     | 0.00     | 0.00     | 0.00     | 0.00     | 0.00     | 0.00     | 0.00     | 0.00     |
| GT14       | 0.01     | 0.15     | 0.02     | 0.00    | 0.04     | 0.02     | 0.06     | 0.00     | 0.02     | 0.02     | 0.01     | 0.02     | 0.01     |
| GH47       | 0.00     | 0.00     | 0.00     | 0.00    | 0.00     | 0.00     | 0.00     | 0.00     | 0.00     | 0.00     | 0.00     | 0.00     | 0.00     |
| GH97       | 0.46     | 1.14     | 0.52     | 0.72    | 0.50     | 0.43     | 0.54     | 0.38     | 0.69     | 0.74     | 0.58     | 0.68     | 0.96     |
| GH50       | 0.00     | 0.00     | 0.00     | 0.00    | 0.00     | 0.00     | 0.00     | 0.04     | 0.00     | 0.04     | 0.05     | 0.08     | 0.02     |
| GT26       | 0.16     | 0.46     | 0.21     | 0.15    | 0.24     | 0.19     | 0.19     | 0.30     | 0.23     | 0.22     | 0.18     | 0.19     | 0.20     |
| GH18       | 0.46     | 0.46     | 0.39     | 0.57    | 0.37     | 0.42     | 0.40     | 0.52     | 0.51     | 0.61     | 0.42     | 0.45     | 0.79     |
| GH37       | 0.00     | 0.00     | 0.03     | 0.01    | 0.00     | 0.00     | 0.01     | 0.00     | 0.00     | 0.00     | 0.00     | 0.03     | 0.00     |
| PL13       | 0.00     | 0.05     | 0.02     | 0.00    | 0.01     | 0.00     | 0.00     | 0.00     | 0.00     | 0.02     | 0.02     | 0.05     | 0.04     |
| GH27       | 0.19     | 0.52     | 0.14     | 0.26    | 0.19     | 0.08     | 0.20     | 0.08     | 0.24     | 0.23     | 0.24     | 0.19     | 0.34     |
| GT54       | 0.00     | 0.00     | 0.00     | 0.00    | 0.00     | 0.00     | 0.00     | 0.00     | 0.00     | 0.00     | 0.00     | 0.00     | 0.00     |
| GT91       | 0.00     | 0.00     | 0.00     | 0.00    | 0.00     | 0.00     | 0.00     | 0.00     | 0.00     | 0.00     | 0.00     | 0.00     | 0.00     |
| GT72       | 0.00     | 0.00     | 0.00     | 0.00    | 0.00     | 0.00     | 0.00     | 0.00     | 0.00     | 0.00     | 0.00     | 0.00     | 0.00     |
| GH67       | 0.03     | 0.05     | 0.06     | 0.07    | 0.11     | 0.04     | 0.04     | 0.16     | 0.12     | 0.05     | 0.01     | 0.04     | 0.09     |
| GH12       | 0.00     | 0.00     | 0.00     | 0.00    | 0.00     | 0.00     | 0.00     | 0.00     | 0.00     | 0.00     | 0.00     | 0.00     | 0.00     |
| GH91       | 0.01     | 0.05     | 0.01     | 0.00    | 0.00     | 0.00     | 0.02     | 0.01     | 0.00     | 0.01     | 0.04     | 0.01     | 0.02     |
| GT69       | 0.00     | 0.00     | 0.00     | 0.00    | 0.00     | 0.00     | 0.00     | 0.00     | 0.00     | 0.00     | 0.00     | 0.00     | 0.00     |
| GH106      | 0.10     | 0.41     | 0.16     | 0.08    | 0.11     | 0.28     | 0.16     | 0.19     | 0.17     | 0.23     | 0.23     | 0.17     | 0.25     |
| GT62       | 0.00     | 0.00     | 0.00     | 0.00    | 0.00     | 0.00     | 0.00     | 0.00     | 0.00     | 0.00     | 0.00     | 0.00     | 0.00     |
| GH17       | 0.00     | 0.00     | 0.00     | 0.00    | 0.00     | 0.00     | 0.00     | 0.00     | 0.00     | 0.00     | 0.00     | 0.00     | 0.00     |
| GH88       | 0.16     | 0.72     | 0.25     | 0.12    | 0.07     | 0.26     | 0.25     | 0.22     | 0.27     | 0.25     | 0.23     | 0.32     | 0.52     |
| CE5        | 0.00     | 0.00     | 0.00     | 0.00    | 0.00     | 0.00     | 0.00     | 0.00     | 0.00     | 0.00     | 0.00     | 0.00     | 0.00     |
| GT8        | 0.04     | 0.00     | 0.04     | 0.12    | 0.08     | 0.19     | 0.10     | 0.16     | 0.15     | 0.12     | 0.14     | 0.05     | 0.13     |
| GT50       | 0.00     | 0.00     | 0.00     | 0.00    | 0.00     | 0.00     | 0.00     | 0.00     | 0.00     | 0.00     | 0.00     | 0.00     | 0.00     |
| GT20       | 0.07     | 0.15     | 0.08     | 0.01    | 0.03     | 0.08     | 0.05     | 0.05     | 0.08     | 0.05     | 0.06     | 0.07     | 0.04     |
| PL9        | 0.07     | 0.05     | 0.03     | 0.00    | 0.04     | 0.09     | 0.11     | 0.22     | 0.15     | 0.12     | 0.00     | 0.15     | 0.16     |
| GH55       | 0.03     | 0.10     | 0.01     | 0.01    | 0.00     | 0.02     | 0.02     | 0.00     | 0.03     | 0.00     | 0.03     | 0.02     | 0.04     |
| GH64       | 0.00     | 0.00     | 0.00     | 0.00    | 0.00     | 0.00     | 0.00     | 0.00     | 0.00     | 0.00     | 0.00     | 0.00     | 0.00     |
| GH127      | 0.12     | 0.36     | 0.22     | 0.24    | 0.22     | 0.19     | 0.24     | 0.33     | 0.31     | 0.32     | 0.19     | 0.24     | 0.25     |
| GH103      | 0.00     | 0.00     | 0.01     | 0.01    | 0.00     | 0.00     | 0.00     | 0.00     | 0.00     | 0.00     | 0.00     | 0.00     | 0.00     |
| GH3        | 1.71     | 4.49     | 2.14     | 2.46    | 1.80     | 1.79     | 2.00     | 1.01     | 2.54     | 2.16     | 2.15     | 2.11     | 2.92     |
| GT45       | 0.00     | 0.00     | 0.00     | 0.00    | 0.00     | 0.00     | 0.00     | 0.00     | 0.00     | 0.00     | 0.00     | 0.00     | 0.00     |
| GT74       | 0.00     | 0.00     | 0.00     | 0.00    | 0.00     | 0.00     | 0.00     | 0.00     | 0.00     | 0.00     | 0.00     | 0.00     | 0.00     |
| GT90       | 0.00     | 0.00     | 0.00     | 0.00    | 0.00     | 0.00     | 0.00     | 0.00     | 0.00     | 0.00     | 0.00     | 0.01     | 0.00     |
| GH116      | 0.10     | 0.31     | 0.02     | 0.02    | 0.00     | 0.11     | 0.07     | 0.00     | 0.10     | 0.00     | 0.01     | 0.07     | 0.08     |
| GH31       | 0.70     | 2.01     | 0.73     | 0.84    | 0.79     | 0.51     | 1.01     | 0.66     | 1.18     | 0.88     | 0.82     | 0.87     | 1.03     |
| GT12       | 0.00     | 0.00     | 0.00     | 0.00    | 0.00     | 0.00     | 0.00     | 0.00     | 0.00     | 0.00     | 0.00     | 0.00     | 0.00     |
| CE1        | 0.27     | 0.67     | 0.40     | 0.26    | 0.30     | 0.40     | 0.36     | 0.41     | 0.35     | 0.34     | 0.35     | 0.30     | 0.40     |
| GH121      | 0.00     | 0.00     | 0.00     | 0.08    | 0.00     | 0.00     | 0.00     | 0.00     | 0.00     | 0.00     | 0.00     | 0.00     | 0.00     |
| GH79       | 0.01     | 0.10     | 0.00     | 0.00    | 0.01     | 0.02     | 0.03     | 0.00     | 0.02     | 0.00     | 0.00     | 0.00     | 0.04     |
| GT73       | 0.00     | 0.00     | 0.01     | 0.00    | 0.00     | 0.00     | 0.00     | 0.00     | 0.00     | 0.00     | 0.00     | 0.00     | 0.00     |
| GH77       | 0.46     | 0.88     | 0.56     | 1.00    | 0.60     | 0.70     | 0.55     | 0.60     | 0.50     | 0.55     | 0.51     | 0.44     | 0.59     |
| PL17       | 0.00     | 0.00     | 0.00     | 0.03    | 0.00     | 0.00     | 0.01     | 0.00     | 0.01     | 0.00     | 0.00     | 0.00     | 0.00     |
| PL8        | 0.21     | 0.26     | 0.17     | 0.09    | 0.12     | 0.09     | 0.16     | 0.08     | 0.11     | 0.14     | 0.13     | 0.36     | 0.37     |

| CAZY_group | DA-AD-27 | DA-AD-28 | DA-AD-29 | DA-AD-3 | DA-AD-30 | DA-AD-31 | DA-AD-32 | DA-AD-33 | DA-AD-34 | DA-AD-35 | DA-AD-36 | DA-AD-37 | DA-AD-38 |      |
|------------|----------|----------|----------|---------|----------|----------|----------|----------|----------|----------|----------|----------|----------|------|
| CE9        |          | 0.16     | 0.41     | 0.27    | 0.41     | 0.19     | 0.38     | 0.14     | 0.22     | 0.22     | 0.29     | 0.23     | 0.20     | 0.39 |
| CE15       |          | 0.00     | 0.05     | 0.01    | 0.03     | 0.00     | 0.02     | 0.01     | 0.03     | 0.01     | 0.03     | 0.01     | 0.02     | 0.05 |
| GT79       |          | 0.00     | 0.00     | 0.00    | 0.00     | 0.00     | 0.00     | 0.00     | 0.00     | 0.00     | 0.00     | 0.00     | 0.00     | 0.00 |
| GT10       |          | 0.00     | 0.00     | 0.00    | 0.00     | 0.00     | 0.00     | 0.01     | 0.00     | 0.02     | 0.00     | 0.00     | 0.00     | 0.01 |
| GH119      |          | 0.00     | 0.00     | 0.00    | 0.00     | 0.00     | 0.00     | 0.00     | 0.00     | 0.00     | 0.00     | 0.00     | 0.00     | 0.00 |
| GH16       |          | 0.15     | 0.41     | 0.18    | 0.11     | 0.08     | 0.09     | 0.15     | 0.11     | 0.18     | 0.20     | 0.14     | 0.20     | 0.22 |
| GH43       |          | 1.33     | 2.84     | 1.46    | 1.46     | 1.41     | 1.51     | 1.75     | 1.91     | 2.53     | 1.78     | 1.35     | 1.70     | 2.54 |
| GH51       |          | 0.33     | 0.77     | 0.32    | 0.35     | 0.42     | 0.26     | 0.36     | 0.36     | 0.47     | 0.52     | 0.42     | 0.44     | 0.56 |
| GT35       |          | 0.91     | 0.93     | 0.75    | 1.19     | 0.98     | 1.00     | 0.95     | 0.98     | 0.94     | 0.84     | 0.94     | 0.60     | 0.77 |
| GT25       |          | 0.00     | 0.00     | 0.00    | 0.00     | 0.00     | 0.00     | 0.00     | 0.00     | 0.00     | 0.00     | 0.00     | 0.00     | 0.00 |
| GT2        |          | 3.26     | 6.30     | 3.76    | 4.09     | 3.94     | 4.61     | 3.89     | 4.57     | 4.42     | 4.06     | 3.10     | 3.42     | 4.92 |
| GT51       |          | 0.75     | 0.57     | 0.77    | 0.94     | 0.77     | 1.00     | 0.80     | 0.90     | 0.83     | 0.87     | 0.73     | 0.64     | 0.86 |
| GH107      |          | 0.00     | 0.00     | 0.00    | 0.00     | 0.00     | 0.00     | 0.00     | 0.00     | 0.00     | 0.00     | 0.00     | 0.00     | 0.00 |
| GH7        |          | 0.00     | 0.00     | 0.00    | 0.00     | 0.00     | 0.00     | 0.00     | 0.00     | 0.00     | 0.00     | 0.00     | 0.00     | 0.00 |
| GT7        |          | 0.00     | 0.00     | 0.00    | 0.00     | 0.00     | 0.00     | 0.00     | 0.00     | 0.00     | 0.00     | 0.00     | 0.00     | 0.00 |
| GT36       |          | 0.00     | 0.00     | 0.00    | 0.00     | 0.00     | 0.00     | 0.00     | 0.00     | 0.00     | 0.00     | 0.00     | 0.00     | 0.00 |
| PL7        |          | 0.00     | 0.00     | 0.00    | 0.00     | 0.01     | 0.00     | 0.00     | 0.00     | 0.00     | 0.00     | 0.00     | 0.00     | 0.00 |
| GH110      |          | 0.07     | 0.26     | 0.08    | 0.06     | 0.04     | 0.11     | 0.06     | 0.11     | 0.10     | 0.05     | 0.05     | 0.11     | 0.10 |
| GT21       |          | 0.00     | 0.00     | 0.00    | 0.00     | 0.00     | 0.00     | 0.00     | 0.00     | 0.00     | 0.00     | 0.00     | 0.00     | 0.00 |
| GH62       |          | 0.00     | 0.00     | 0.00    | 0.00     | 0.00     | 0.00     | 0.00     | 0.00     | 0.00     | 0.00     | 0.00     | 0.00     | 0.00 |
| GH125      |          | 0.18     | 0.26     | 0.11    | 0.15     | 0.09     | 0.13     | 0.09     | 0.00     | 0.09     | 0.13     | 0.14     | 0.17     | 0.22 |
| GH117      |          | 0.03     | 0.31     | 0.08    | 0.06     | 0.03     | 0.06     | 0.06     | 0.05     | 0.05     | 0.04     | 0.06     | 0.11     | 0.09 |
| GH68       |          | 0.00     | 0.00     | 0.00    | 0.00     | 0.00     | 0.00     | 0.00     | 0.00     | 0.00     | 0.00     | 0.00     | 0.00     | 0.00 |
| GH85       |          | 0.01     | 0.00     | 0.00    | 0.07     | 0.03     | 0.00     | 0.00     | 0.00     | 0.00     | 0.02     | 0.00     | 0.01     | 0.01 |
| GH92       |          | 1.22     | 2.12     | 1.15    | 1.33     | 0.70     | 1.42     | 0.94     | 0.88     | 1.33     | 1.40     | 1.18     | 1.31     | 2.00 |
| GH40       |          | 0.00     | 0.00     | 0.00    | 0.00     | 0.00     | 0.00     | 0.00     | 0.00     | 0.00     | 0.00     | 0.00     | 0.00     | 0.00 |
| GT49       |          | 0.00     | 0.00     | 0.00    | 0.00     | 0.00     | 0.00     | 0.00     | 0.00     | 0.00     | 0.00     | 0.00     | 0.00     | 0.00 |
| GH112      |          | 0.13     | 0.10     | 0.20    | 0.30     | 0.19     | 0.17     | 0.11     | 0.19     | 0.15     | 0.17     | 0.22     | 0.08     | 0.14 |
| GT67       |          | 0.00     | 0.00     | 0.00    | 0.00     | 0.00     | 0.00     | 0.00     | 0.00     | 0.00     | 0.00     | 0.00     | 0.00     | 0.00 |
| CE8        |          | 0.16     | 0.21     | 0.16    | 0.07     | 0.12     | 0.28     | 0.21     | 0.41     | 0.20     | 0.23     | 0.09     | 0.28     | 0.28 |
| GT86       |          | 0.00     | 0.00     | 0.00    | 0.00     | 0.00     | 0.00     | 0.00     | 0.00     | 0.00     | 0.00     | 0.00     | 0.00     | 0.00 |
| GH101      |          | 0.00     | 0.00     | 0.00    | 0.07     | 0.00     | 0.00     | 0.00     | 0.00     | 0.00     | 0.00     | 0.00     | 0.00     | 0.01 |
| GH81       |          | 0.00     | 0.00     | 0.00    | 0.00     | 0.00     | 0.00     | 0.00     | 0.00     | 0.00     | 0.00     | 0.00     | 0.00     | 0.00 |
| GT93       |          | 0.00     | 0.00     | 0.00    | 0.00     | 0.00     | 0.00     | 0.00     | 0.00     | 0.00     | 0.00     | 0.00     | 0.00     | 0.00 |
| GT63       |          | 0.00     | 0.00     | 0.00    | 0.00     | 0.00     | 0.00     | 0.00     | 0.00     | 0.00     | 0.00     | 0.00     | 0.00     | 0.00 |
| CE11       |          | 0.18     | 0.15     | 0.19    | 0.17     | 0.19     | 0.25     | 0.23     | 0.25     | 0.22     | 0.17     | 0.24     | 0.20     | 0.22 |
| GT19       |          | 0.09     | 0.10     | 0.13    | 0.12     | 0.09     | 0.11     | 0.09     | 0.08     | 0.13     | 0.10     | 0.15     | 0.12     | 0.12 |
| GT33       |          | 0.00     | 0.00     | 0.00    | 0.00     | 0.00     | 0.00     | 0.00     | 0.00     | 0.00     | 0.00     | 0.00     | 0.00     | 0.00 |
| GH21       |          | 0.00     | 0.00     | 0.00    | 0.00     | 0.00     | 0.00     | 0.00     | 0.00     | 0.00     | 0.00     | 0.00     | 0.00     | 0.00 |
| GT68       |          | 0.00     | 0.00     | 0.00    | 0.00     | 0.00     | 0.00     | 0.00     | 0.00     | 0.00     | 0.00     | 0.00     | 0.00     | 0.00 |
| GH89       |          | 0.12     | 0.21     | 0.17    | 0.11     | 0.12     | 0.08     | 0.14     | 0.08     | 0.19     | 0.23     | 0.17     | 0.20     | 0.30 |
| GT82       |          | 0.00     | 0.00     | 0.00    | 0.00     | 0.00     | 0.00     | 0.00     | 0.00     | 0.00     | 0.00     | 0.00     | 0.00     | 0.00 |
| GH30       |          | 0.22     | 0.41     | 0.13    | 0.24     | 0.14     | 0.11     | 0.16     | 0.25     | 0.22     | 0.15     | 0.13     | 0.24     | 0.27 |
| GH20       |          | 0.58     | 2.07     | 0.87    | 0.81     | 0.39     | 0.68     | 0.62     | 0.66     | 0.92     | 0.84     | 0.96     | 0.90     | 1.18 |
| GH52       |          | 0.00     | 0.00     | 0.00    | 0.00     | 0.00     | 0.00     | 0.00     | 0.00     | 0.00     | 0.00     | 0.00     | 0.00     | 0.00 |
| GT84       |          | 0.01     | 0.00     | 0.03    | 0.12     | 0.04     | 0.04     | 0.00     | 0.03     | 0.02     | 0.01     | 0.00     | 0.03     | 0.01 |
| GT15       |          | 0.00     | 0.00     | 0.00    | 0.00     | 0.00     | 0.00     | 0.00     | 0.00     | 0.00     | 0.00     | 0.00     | 0.00     | 0.00 |
| GH93       |          | 0.00     | 0.00     | 0.00    | 0.00     | 0.00     | 0.00     | 0.00     | 0.00     | 0.00     | 0.00     | 0.00     | 0.00     | 0.00 |
| PL16       |          | 0.00     | 0.00     | 0.00    | 0.00     | 0.00     | 0.00     | 0.00     | 0.00     | 0.00     | 0.00     | 0.00     | 0.00     | 0.00 |
| GH26       |          | 0.22     | 0.41     | 0.12    | 0.09     | 0.12     | 0.15     | 0.17     | 0.19     | 0.09     | 0.20     | 0.04     | 0.10     | 0.18 |





| CAZY_group | DA-AD-27 | DA-AD-28 | DA-AD-29 | DA-AD-3 | DA-AD-30 | DA-AD-31 | DA-AD-32 | DA-AD-33 | DA-AD-34 | DA-AD-35 | DA-AD-36 | DA-AD-37 | DA-AD-38 |
|------------|----------|----------|----------|---------|----------|----------|----------|----------|----------|----------|----------|----------|----------|
| GT52       |          | 0.00     | 0.00     | 0.00    | 0.00     | 0.00     | 0.00     | 0.00     | 0.00     | 0.00     | 0.00     | 0.00     | 0.00     |
| GT64       |          | 0.00     | 0.00     | 0.00    | 0.00     | 0.00     | 0.00     | 0.00     | 0.00     | 0.00     | 0.00     | 0.00     | 0.00     |
| GT85       |          | 0.00     | 0.00     | 0.00    | 0.00     | 0.00     | 0.00     | 0.00     | 0.00     | 0.00     | 0.00     | 0.00     | 0.00     |
| GT16       |          | 0.00     | 0.00     | 0.00    | 0.00     | 0.00     | 0.00     | 0.00     | 0.00     | 0.00     | 0.00     | 0.00     | 0.00     |
| GH56       |          | 0.00     | 0.00     | 0.00    | 0.00     | 0.00     | 0.00     | 0.00     | 0.00     | 0.00     | 0.00     | 0.00     | 0.00     |
| GT60       |          | 0.00     | 0.00     | 0.00    | 0.00     | 0.00     | 0.00     | 0.00     | 0.00     | 0.00     | 0.00     | 0.00     | 0.00     |
| GH41       |          | 0.00     | 0.00     | 0.00    | 0.00     | 0.00     | 0.00     | 0.00     | 0.00     | 0.00     | 0.00     | 0.00     | 0.00     |
| CE7        |          | 0.10     | 0.31     | 0.10    | 0.05     | 0.04     | 0.08     | 0.04     | 0.08     | 0.08     | 0.05     | 0.05     | 0.10     |
| GH39       |          | 0.00     | 0.05     | 0.05    | 0.01     | 0.09     | 0.02     | 0.09     | 0.11     | 0.04     | 0.04     | 0.03     | 0.01     |
| GT30       |          | 0.25     | 0.31     | 0.25    | 0.27     | 0.12     | 0.23     | 0.20     | 0.14     | 0.17     | 0.24     | 0.20     | 0.21     |
| PL15       |          | 0.01     | 0.21     | 0.05    | 0.00     | 0.05     | 0.00     | 0.03     | 0.00     | 0.06     | 0.10     | 0.15     | 0.05     |
| GH102      |          | 0.00     | 0.00     | 0.01    | 0.09     | 0.01     | 0.06     | 0.02     | 0.03     | 0.02     | 0.00     | 0.01     | 0.02     |

| CAZY_group | DA-AD-39 | DA-AD-4 | DA-AD-40 | DA-AD-41 | DA-AD-42 | DA-AD-43 | DA-AD-44 | DA-AD-45 | DA-AD-46 | DA-AD-47 | DA-AD-48 | DA-AD-49 | DA-AD-5 |
|------------|----------|---------|----------|----------|----------|----------|----------|----------|----------|----------|----------|----------|---------|
| GH29       | 0.61     | 0.36    | 0.06     | 0.50     | 0.53     | 0.51     | 0.61     | 0.97     | 0.91     | 0.66     | 0.65     | 0.60     | 0.31    |
| PL4        | 0.00     | 0.00    | 0.00     | 0.00     | 0.00     | 0.00     | 0.00     | 0.00     | 0.00     | 0.00     | 0.00     | 0.00     | 0.00    |
| GH23       | 0.88     | 1.57    | 0.01     | 0.96     | 0.85     | 0.74     | 1.00     | 1.18     | 1.23     | 1.07     | 1.06     | 0.99     | 0.94    |
| CE6        | 0.02     | 0.03    | 0.00     | 0.01     | 0.03     | 0.02     | 0.07     | 0.00     | 0.00     | 0.00     | 0.06     | 0.02     | 0.10    |
| GH72       | 0.16     | 0.14    | 0.00     | 0.09     | 0.08     | 0.10     | 0.17     | 0.10     | 0.12     | 0.17     | 0.11     | 0.15     | 0.26    |
| GH114      | 0.00     | 0.00    | 0.00     | 0.00     | 0.00     | 0.00     | 0.00     | 0.00     | 0.00     | 0.00     | 0.00     | 0.00     | 0.00    |
| GH78       | 0.50     | 0.54    | 0.07     | 0.52     | 0.65     | 0.56     | 0.66     | 0.63     | 1.21     | 0.75     | 0.56     | 0.56     | 0.68    |
| PL19       | 0.00     | 0.00    | 0.00     | 0.00     | 0.00     | 0.00     | 0.00     | 0.00     | 0.00     | 0.00     | 0.00     | 0.00     | 0.00    |
| GT27       | 0.00     | 0.00    | 0.00     | 0.00     | 0.00     | 0.00     | 0.00     | 0.00     | 0.00     | 0.00     | 0.00     | 0.00     | 0.00    |
| GH5        | 0.35     | 0.42    | 0.00     | 0.42     | 0.37     | 0.53     | 0.74     | 0.65     | 0.58     | 0.70     | 0.47     | 0.41     | 0.63    |
| GT40       | 0.00     | 0.00    | 0.00     | 0.00     | 0.00     | 0.00     | 0.00     | 0.00     | 0.00     | 0.00     | 0.00     | 0.00     | 0.00    |
| CE13       | 0.00     | 0.00    | 0.00     | 0.00     | 0.00     | 0.00     | 0.00     | 0.00     | 0.00     | 0.00     | 0.00     | 0.00     | 0.00    |
| GT37       | 0.00     | 0.00    | 0.00     | 0.00     | 0.00     | 0.00     | 0.00     | 0.00     | 0.00     | 0.00     | 0.00     | 0.00     | 0.00    |
| GH33       | 0.14     | 0.09    | 0.01     | 0.14     | 0.24     | 0.12     | 0.15     | 0.23     | 0.30     | 0.24     | 0.22     | 0.18     | 0.00    |
| GT65       | 0.00     | 0.00    | 0.00     | 0.00     | 0.00     | 0.00     | 0.00     | 0.00     | 0.00     | 0.00     | 0.00     | 0.00     | 0.00    |
| GH86       | 0.02     | 0.00    | 0.00     | 0.00     | 0.00     | 0.00     | 0.00     | 0.00     | 0.00     | 0.00     | 0.00     | 0.01     | 0.00    |
| GH123      | 0.07     | 0.07    | 0.00     | 0.10     | 0.09     | 0.09     | 0.15     | 0.15     | 0.12     | 0.09     | 0.06     | 0.05     | 0.00    |
| GH96       | 0.00     | 0.00    | 0.00     | 0.00     | 0.00     | 0.00     | 0.00     | 0.00     | 0.00     | 0.00     | 0.00     | 0.00     | 0.00    |
| GH14       | 0.00     | 0.00    | 0.00     | 0.00     | 0.00     | 0.00     | 0.00     | 0.00     | 0.00     | 0.00     | 0.00     | 0.00     | 0.00    |
| CE3        | 0.00     | 0.00    | 0.00     | 0.00     | 0.00     | 0.00     | 0.00     | 0.00     | 0.00     | 0.00     | 0.00     | 0.00     | 0.00    |
| PL10       | 0.07     | 0.05    | 0.01     | 0.03     | 0.10     | 0.06     | 0.10     | 0.09     | 0.16     | 0.22     | 0.09     | 0.08     | 0.10    |
| GT48       | 0.00     | 0.00    | 0.00     | 0.00     | 0.00     | 0.00     | 0.00     | 0.00     | 0.00     | 0.00     | 0.00     | 0.00     | 0.00    |
| PL6        | 0.00     | 0.00    | 0.00     | 0.01     | 0.00     | 0.00     | 0.01     | 0.00     | 0.00     | 0.00     | 0.00     | 0.00     | 0.00    |
| GT83       | 0.04     | 0.04    | 0.01     | 0.08     | 0.06     | 0.05     | 0.09     | 0.03     | 0.19     | 0.05     | 0.09     | 0.10     | 0.05    |
| GH126      | 0.00     | 0.00    | 0.00     | 0.00     | 0.00     | 0.00     | 0.00     | 0.00     | 0.00     | 0.00     | 0.00     | 0.00     | 0.00    |
| GH9        | 0.26     | 0.16    | 0.06     | 0.15     | 0.16     | 0.18     | 0.33     | 0.21     | 0.07     | 0.55     | 0.52     | 0.25     | 0.78    |
| GH75       | 0.00     | 0.00    | 0.00     | 0.00     | 0.00     | 0.00     | 0.00     | 0.00     | 0.00     | 0.00     | 0.00     | 0.00     | 0.00    |
| GT71       | 0.00     | 0.00    | 0.00     | 0.00     | 0.00     | 0.00     | 0.00     | 0.00     | 0.00     | 0.00     | 0.00     | 0.00     | 0.00    |
| GH46       | 0.00     | 0.01    | 0.00     | 0.00     | 0.00     | 0.01     | 0.00     | 0.00     | 0.00     | 0.00     | 0.00     | 0.00     | 0.00    |
| GT61       | 0.00     | 0.00    | 0.00     | 0.00     | 0.00     | 0.00     | 0.00     | 0.00     | 0.00     | 0.00     | 0.00     | 0.00     | 0.00    |
| GT3        | 0.19     | 0.15    | 0.02     | 0.17     | 0.15     | 0.16     | 0.07     | 0.28     | 0.28     | 0.17     | 0.13     | 0.20     | 0.31    |
| PL3        | 0.00     | 0.00    | 0.00     | 0.00     | 0.00     | 0.00     | 0.00     | 0.00     | 0.00     | 0.00     | 0.00     | 0.00     | 0.00    |
| GH108      | 0.02     | 0.01    | 0.00     | 0.02     | 0.06     | 0.03     | 0.01     | 0.01     | 0.05     | 0.02     | 0.06     | 0.03     | 0.00    |
| GT56       | 0.00     | 0.00    | 0.00     | 0.00     | 0.00     | 0.00     | 0.00     | 0.00     | 0.00     | 0.00     | 0.00     | 0.00     | 0.00    |
| PL11       | 0.12     | 0.08    | 0.00     | 0.08     | 0.10     | 0.13     | 0.19     | 0.23     | 0.19     | 0.20     | 0.06     | 0.08     | 0.00    |
| GH45       | 0.00     | 0.00    | 0.00     | 0.00     | 0.00     | 0.00     | 0.00     | 0.00     | 0.00     | 0.00     | 0.00     | 0.00     | 0.00    |
| GT34       | 0.00     | 0.00    | 0.00     | 0.00     | 0.00     | 0.00     | 0.00     | 0.00     | 0.00     | 0.00     | 0.00     | 0.00     | 0.00    |
| PL14       | 0.00     | 0.00    | 0.00     | 0.00     | 0.00     | 0.00     | 0.00     | 0.00     | 0.00     | 0.00     | 0.00     | 0.00     | 0.00    |
| GH19       | 0.00     | 0.00    | 0.00     | 0.01     | 0.01     | 0.01     | 0.00     | 0.00     | 0.02     | 0.00     | 0.00     | 0.00     | 0.00    |
| GH118      | 0.00     | 0.00    | 0.00     | 0.00     | 0.00     | 0.00     | 0.00     | 0.00     | 0.00     | 0.00     | 0.00     | 0.00     | 0.00    |
| GH82       | 0.00     | 0.00    | 0.00     | 0.00     | 0.00     | 0.00     | 0.00     | 0.00     | 0.00     | 0.00     | 0.00     | 0.00     | 0.00    |
| GH76       | 0.13     | 0.02    | 0.02     | 0.10     | 0.15     | 0.15     | 0.22     | 0.10     | 0.09     | 0.12     | 0.11     | 0.08     | 0.05    |
| GT4        | 1.62     | 1.99    | 0.08     | 1.52     | 1.74     | 1.80     | 2.16     | 1.73     | 1.90     | 2.32     | 1.55     | 1.75     | 1.46    |
| GT87       | 0.00     | 0.00    | 0.00     | 0.00     | 0.00     | 0.00     | 0.00     | 0.00     | 0.00     | 0.02     | 0.02     | 0.01     | 0.00    |
| GH24       | 0.06     | 0.12    | 0.01     | 0.10     | 0.08     | 0.09     | 0.05     | 0.09     | 0.14     | 0.12     | 0.06     | 0.10     | 0.00    |
| GH90       | 0.00     | 0.00    | 0.00     | 0.00     | 0.00     | 0.00     | 0.00     | 0.00     | 0.00     | 0.00     | 0.00     | 0.00     | 0.00    |
| GH57       | 0.18     | 0.20    | 0.01     | 0.11     | 0.13     | 0.05     | 0.07     | 0.15     | 0.35     | 0.17     | 0.15     | 0.16     | 0.21    |
| GH36       | 0.66     | 0.71    | 0.01     | 0.61     | 0.54     | 0.60     | 0.82     | 0.82     | 0.72     | 0.68     | 0.93     | 0.67     | 0.84    |
| GT46       | 0.00     | 0.00    | 0.00     | 0.00     | 0.00     | 0.00     | 0.00     | 0.00     | 0.00     | 0.00     | 0.00     | 0.00     | 0.00    |
| GH66       | 0.02     | 0.01    | 0.00     | 0.01     | 0.04     | 0.01     | 0.02     | 0.06     | 0.05     | 0.03     | 0.04     | 0.03     | 0.00    |



| CAZY_group | DA-AD-39 | DA-AD-4 | DA-AD-40 | DA-AD-41 | DA-AD-42 | DA-AD-43 | DA-AD-44 | DA-AD-45 | DA-AD-46 | DA-AD-47 | DA-AD-48 | DA-AD-49 | DA-AD-5 |
|------------|----------|---------|----------|----------|----------|----------|----------|----------|----------|----------|----------|----------|---------|
| GT76       | 0.00     | 0.00    | 0.00     | 0.00     | 0.00     | 0.00     | 0.00     | 0.00     | 0.00     | 0.00     | 0.00     | 0.00     | 0.00    |
| GT32       | 0.08     | 0.08    | 0.00     | 0.00     | 0.08     | 0.13     | 0.11     | 0.08     | 0.10     | 0.09     | 0.12     | 0.15     | 0.09    |
| GT47       | 0.03     | 0.09    | 0.00     | 0.00     | 0.03     | 0.10     | 0.02     | 0.04     | 0.03     | 0.02     | 0.12     | 0.00     | 0.02    |
| GH84       | 0.08     | 0.09    | 0.00     | 0.00     | 0.08     | 0.08     | 0.03     | 0.10     | 0.18     | 0.14     | 0.10     | 0.11     | 0.09    |
| GH83       | 0.00     | 0.00    | 0.00     | 0.00     | 0.00     | 0.00     | 0.00     | 0.00     | 0.00     | 0.00     | 0.00     | 0.00     | 0.00    |
| GT59       | 0.00     | 0.00    | 0.00     | 0.00     | 0.00     | 0.00     | 0.00     | 0.00     | 0.00     | 0.00     | 0.00     | 0.00     | 0.00    |
| GH34       | 0.00     | 0.00    | 0.00     | 0.00     | 0.00     | 0.00     | 0.00     | 0.00     | 0.00     | 0.00     | 0.00     | 0.00     | 0.00    |
| GT14       | 0.02     | 0.01    | 0.00     | 0.00     | 0.02     | 0.03     | 0.02     | 0.03     | 0.05     | 0.00     | 0.02     | 0.02     | 0.01    |
| GH47       | 0.00     | 0.00    | 0.00     | 0.00     | 0.00     | 0.03     | 0.00     | 0.00     | 0.00     | 0.00     | 0.00     | 0.00     | 0.00    |
| GH97       | 0.66     | 0.48    | 0.08     | 0.54     | 0.63     | 0.60     | 0.89     | 1.10     | 1.28     | 0.97     | 0.78     | 0.63     | 0.42    |
| GH50       | 0.01     | 0.00    | 0.00     | 0.02     | 0.03     | 0.03     | 0.02     | 0.02     | 0.00     | 0.00     | 0.02     | 0.00     | 0.01    |
| GT26       | 0.20     | 0.20    | 0.00     | 0.18     | 0.20     | 0.21     | 0.25     | 0.20     | 0.23     | 0.24     | 0.17     | 0.23     | 0.21    |
| GH18       | 0.55     | 0.40    | 0.03     | 0.53     | 0.58     | 0.32     | 0.74     | 0.50     | 0.51     | 0.51     | 0.60     | 0.36     | 0.37    |
| GH37       | 0.01     | 0.00    | 0.00     | 0.00     | 0.00     | 0.00     | 0.00     | 0.00     | 0.00     | 0.00     | 0.00     | 0.00     | 0.00    |
| PL13       | 0.06     | 0.00    | 0.00     | 0.00     | 0.00     | 0.05     | 0.02     | 0.04     | 0.00     | 0.00     | 0.05     | 0.04     | 0.01    |
| GH27       | 0.26     | 0.17    | 0.00     | 0.12     | 0.25     | 0.12     | 0.27     | 0.19     | 0.19     | 0.24     | 0.15     | 0.21     | 0.26    |
| GT54       | 0.00     | 0.00    | 0.00     | 0.00     | 0.00     | 0.00     | 0.00     | 0.00     | 0.00     | 0.00     | 0.00     | 0.00     | 0.00    |
| GT91       | 0.00     | 0.00    | 0.00     | 0.00     | 0.00     | 0.00     | 0.00     | 0.00     | 0.00     | 0.00     | 0.00     | 0.00     | 0.00    |
| GT72       | 0.00     | 0.00    | 0.00     | 0.00     | 0.00     | 0.00     | 0.00     | 0.00     | 0.00     | 0.00     | 0.00     | 0.00     | 0.00    |
| GH67       | 0.04     | 0.05    | 0.00     | 0.08     | 0.06     | 0.05     | 0.05     | 0.09     | 0.26     | 0.14     | 0.04     | 0.10     | 0.05    |
| GH12       | 0.00     | 0.00    | 0.00     | 0.00     | 0.00     | 0.00     | 0.00     | 0.00     | 0.00     | 0.00     | 0.00     | 0.00     | 0.00    |
| GH91       | 0.01     | 0.00    | 0.00     | 0.02     | 0.01     | 0.04     | 0.02     | 0.00     | 0.02     | 0.00     | 0.06     | 0.02     | 0.00    |
| GT69       | 0.00     | 0.00    | 0.00     | 0.00     | 0.00     | 0.00     | 0.00     | 0.00     | 0.00     | 0.00     | 0.00     | 0.00     | 0.00    |
| GH106      | 0.20     | 0.12    | 0.03     | 0.14     | 0.19     | 0.27     | 0.23     | 0.29     | 0.30     | 0.26     | 0.22     | 0.25     | 0.57    |
| GT62       | 0.00     | 0.00    | 0.00     | 0.00     | 0.00     | 0.00     | 0.00     | 0.00     | 0.00     | 0.00     | 0.00     | 0.00     | 0.00    |
| GH17       | 0.00     | 0.00    | 0.00     | 0.00     | 0.00     | 0.00     | 0.00     | 0.00     | 0.00     | 0.00     | 0.00     | 0.00     | 0.00    |
| GH88       | 0.33     | 0.09    | 0.01     | 0.14     | 0.22     | 0.30     | 0.27     | 0.29     | 0.21     | 0.37     | 0.37     | 0.21     | 0.05    |
| CE5        | 0.00     | 0.00    | 0.00     | 0.00     | 0.00     | 0.00     | 0.00     | 0.00     | 0.00     | 0.00     | 0.00     | 0.00     | 0.00    |
| GT8        | 0.09     | 0.09    | 0.00     | 0.10     | 0.04     | 0.05     | 0.08     | 0.06     | 0.14     | 0.07     | 0.04     | 0.14     | 0.16    |
| GT50       | 0.00     | 0.00    | 0.00     | 0.00     | 0.00     | 0.00     | 0.00     | 0.00     | 0.00     | 0.00     | 0.00     | 0.00     | 0.00    |
| GT20       | 0.07     | 0.00    | 0.01     | 0.08     | 0.05     | 0.09     | 0.07     | 0.05     | 0.09     | 0.09     | 0.09     | 0.09     | 0.08    |
| PL9        | 0.04     | 0.03    | 0.00     | 0.04     | 0.02     | 0.06     | 0.24     | 0.08     | 0.05     | 0.07     | 0.06     | 0.02     | 0.16    |
| GH55       | 0.04     | 0.01    | 0.00     | 0.01     | 0.02     | 0.02     | 0.02     | 0.05     | 0.00     | 0.03     | 0.04     | 0.02     | 0.00    |
| GH64       | 0.00     | 0.00    | 0.00     | 0.00     | 0.00     | 0.00     | 0.00     | 0.00     | 0.02     | 0.00     | 0.00     | 0.00     | 0.00    |
| GH127      | 0.24     | 0.35    | 0.02     | 0.24     | 0.27     | 0.29     | 0.30     | 0.33     | 0.56     | 0.26     | 0.41     | 0.35     | 0.21    |
| GH103      | 0.00     | 0.01    | 0.00     | 0.00     | 0.00     | 0.00     | 0.00     | 0.00     | 0.00     | 0.00     | 0.00     | 0.00     | 0.00    |
| GH3        | 1.96     | 1.85    | 0.21     | 2.22     | 2.19     | 2.35     | 2.91     | 3.01     | 2.28     | 3.05     | 2.81     | 1.97     | 2.09    |
| GT45       | 0.00     | 0.00    | 0.00     | 0.00     | 0.00     | 0.00     | 0.00     | 0.00     | 0.00     | 0.00     | 0.00     | 0.00     | 0.00    |
| GT74       | 0.00     | 0.00    | 0.00     | 0.00     | 0.00     | 0.00     | 0.00     | 0.00     | 0.00     | 0.00     | 0.00     | 0.00     | 0.00    |
| GT90       | 0.00     | 0.00    | 0.00     | 0.00     | 0.00     | 0.00     | 0.00     | 0.00     | 0.00     | 0.00     | 0.00     | 0.00     | 0.00    |
| GH116      | 0.11     | 0.03    | 0.00     | 0.05     | 0.08     | 0.05     | 0.07     | 0.08     | 0.00     | 0.02     | 0.09     | 0.06     | 0.00    |
| GH31       | 0.78     | 0.66    | 0.06     | 0.85     | 0.90     | 0.89     | 1.19     | 1.22     | 0.84     | 1.02     | 0.93     | 0.76     | 0.84    |
| GT12       | 0.00     | 0.00    | 0.00     | 0.00     | 0.00     | 0.00     | 0.00     | 0.00     | 0.00     | 0.00     | 0.00     | 0.00     | 0.00    |
| CE1        | 0.28     | 0.30    | 0.01     | 0.26     | 0.34     | 0.32     | 0.40     | 0.74     | 0.74     | 0.41     | 0.37     | 0.30     | 0.47    |
| GH121      | 0.00     | 0.00    | 0.00     | 0.00     | 0.00     | 0.00     | 0.00     | 0.00     | 0.00     | 0.00     | 0.00     | 0.00     | 0.00    |
| GH79       | 0.02     | 0.00    | 0.00     | 0.00     | 0.00     | 0.00     | 0.01     | 0.00     | 0.03     | 0.00     | 0.00     | 0.00     | 0.00    |
| GT73       | 0.00     | 0.00    | 0.00     | 0.00     | 0.00     | 0.00     | 0.00     | 0.00     | 0.00     | 0.00     | 0.00     | 0.00     | 0.00    |
| GH77       | 0.50     | 0.80    | 0.07     | 0.56     | 0.52     | 0.57     | 0.75     | 0.71     | 0.74     | 0.55     | 0.60     | 0.59     | 0.68    |
| PL17       | 0.01     | 0.01    | 0.00     | 0.01     | 0.00     | 0.01     | 0.00     | 0.00     | 0.00     | 0.00     | 0.00     | 0.00     | 0.00    |
| PL8        | 0.37     | 0.02    | 0.01     | 0.08     | 0.22     | 0.19     | 0.15     | 0.26     | 0.00     | 0.29     | 0.22     | 0.13     | 0.00    |

| CAZY_group | DA-AD-39 | DA-AD-4 | DA-AD-40 | DA-AD-41 | DA-AD-42 | DA-AD-43 | DA-AD-44 | DA-AD-45 | DA-AD-46 | DA-AD-47 | DA-AD-48 | DA-AD-49 | DA-AD-5 |      |
|------------|----------|---------|----------|----------|----------|----------|----------|----------|----------|----------|----------|----------|---------|------|
| CE9        |          | 0.21    | 0.26     | 0.00     | 0.19     | 0.22     | 0.31     | 0.38     | 0.40     | 0.30     | 0.15     | 0.26     | 0.22    | 0.21 |
| CE15       |          | 0.02    | 0.01     | 0.00     | 0.00     | 0.01     | 0.00     | 0.00     | 0.00     | 0.00     | 0.00     | 0.00     | 0.00    | 0.00 |
| GT79       |          | 0.00    | 0.00     | 0.00     | 0.00     | 0.00     | 0.00     | 0.00     | 0.00     | 0.00     | 0.00     | 0.00     | 0.00    | 0.00 |
| GT10       |          | 0.01    | 0.00     | 0.00     | 0.00     | 0.00     | 0.00     | 0.03     | 0.00     | 0.00     | 0.00     | 0.06     | 0.03    | 0.00 |
| GH119      |          | 0.00    | 0.00     | 0.00     | 0.00     | 0.00     | 0.00     | 0.00     | 0.00     | 0.00     | 0.00     | 0.00     | 0.00    | 0.00 |
| GH16       |          | 0.23    | 0.13     | 0.01     | 0.13     | 0.16     | 0.13     | 0.22     | 0.28     | 0.12     | 0.20     | 0.35     | 0.18    | 0.05 |
| GH43       |          | 1.53    | 1.16     | 0.24     | 1.31     | 1.58     | 2.06     | 2.31     | 2.71     | 3.37     | 2.37     | 2.01     | 2.08    | 0.99 |
| GH51       |          | 0.38    | 0.50     | 0.08     | 0.35     | 0.41     | 0.46     | 0.60     | 0.53     | 0.79     | 0.53     | 0.80     | 0.59    | 0.47 |
| GT35       |          | 0.73    | 1.31     | 0.16     | 0.88     | 0.87     | 0.75     | 1.08     | 0.68     | 0.98     | 0.87     | 0.89     | 0.96    | 1.36 |
| GT25       |          | 0.00    | 0.00     | 0.00     | 0.00     | 0.00     | 0.00     | 0.00     | 0.00     | 0.00     | 0.00     | 0.00     | 0.00    | 0.00 |
| GT2        |          | 3.52    | 5.59     | 0.29     | 3.25     | 3.43     | 4.19     | 5.12     | 4.67     | 4.37     | 4.04     | 4.34     | 3.67    | 5.27 |
| GT51       |          | 0.72    | 0.83     | 0.10     | 0.62     | 0.65     | 0.81     | 1.06     | 1.17     | 1.32     | 0.75     | 1.01     | 0.74    | 1.46 |
| GH107      |          | 0.00    | 0.00     | 0.00     | 0.00     | 0.00     | 0.00     | 0.00     | 0.00     | 0.00     | 0.00     | 0.00     | 0.00    | 0.00 |
| GH7        |          | 0.00    | 0.00     | 0.00     | 0.00     | 0.00     | 0.00     | 0.00     | 0.00     | 0.00     | 0.00     | 0.00     | 0.00    | 0.00 |
| GT7        |          | 0.00    | 0.00     | 0.00     | 0.00     | 0.00     | 0.00     | 0.00     | 0.00     | 0.00     | 0.00     | 0.00     | 0.00    | 0.00 |
| GT36       |          | 0.00    | 0.00     | 0.00     | 0.00     | 0.00     | 0.00     | 0.00     | 0.00     | 0.00     | 0.00     | 0.00     | 0.00    | 0.00 |
| PL7        |          | 0.00    | 0.00     | 0.00     | 0.00     | 0.00     | 0.00     | 0.00     | 0.00     | 0.00     | 0.00     | 0.00     | 0.00    | 0.00 |
| GH110      |          | 0.08    | 0.03     | 0.01     | 0.04     | 0.07     | 0.04     | 0.12     | 0.09     | 0.07     | 0.09     | 0.17     | 0.08    | 0.00 |
| GT21       |          | 0.00    | 0.00     | 0.00     | 0.00     | 0.00     | 0.00     | 0.00     | 0.00     | 0.00     | 0.00     | 0.00     | 0.00    | 0.00 |
| GH62       |          | 0.00    | 0.00     | 0.00     | 0.00     | 0.00     | 0.00     | 0.00     | 0.00     | 0.00     | 0.00     | 0.00     | 0.00    | 0.00 |
| GH125      |          | 0.20    | 0.16     | 0.01     | 0.15     | 0.10     | 0.12     | 0.19     | 0.23     | 0.14     | 0.19     | 0.11     | 0.12    | 0.05 |
| GH117      |          | 0.08    | 0.03     | 0.01     | 0.04     | 0.03     | 0.04     | 0.07     | 0.08     | 0.05     | 0.20     | 0.06     | 0.07    | 0.00 |
| GH68       |          | 0.00    | 0.00     | 0.00     | 0.00     | 0.00     | 0.01     | 0.00     | 0.00     | 0.00     | 0.00     | 0.00     | 0.00    | 0.00 |
| GH85       |          | 0.00    | 0.06     | 0.00     | 0.00     | 0.01     | 0.00     | 0.05     | 0.00     | 0.00     | 0.02     | 0.02     | 0.01    | 0.00 |
| GH92       |          | 1.23    | 0.73     | 0.20     | 1.06     | 1.27     | 1.16     | 1.67     | 1.76     | 1.81     | 2.10     | 1.23     | 0.98    | 1.20 |
| GH40       |          | 0.00    | 0.00     | 0.00     | 0.00     | 0.00     | 0.00     | 0.00     | 0.00     | 0.00     | 0.00     | 0.00     | 0.00    | 0.00 |
| GT49       |          | 0.00    | 0.00     | 0.00     | 0.00     | 0.01     | 0.00     | 0.00     | 0.00     | 0.00     | 0.00     | 0.00     | 0.00    | 0.00 |
| GH112      |          | 0.09    | 0.19     | 0.01     | 0.15     | 0.12     | 0.19     | 0.13     | 0.11     | 0.09     | 0.10     | 0.15     | 0.07    | 0.47 |
| GT67       |          | 0.00    | 0.00     | 0.00     | 0.00     | 0.00     | 0.00     | 0.00     | 0.00     | 0.00     | 0.00     | 0.00     | 0.00    | 0.00 |
| CE8        |          | 0.16    | 0.14     | 0.00     | 0.11     | 0.11     | 0.26     | 0.32     | 0.28     | 0.21     | 0.19     | 0.28     | 0.16    | 0.10 |
| GT86       |          | 0.00    | 0.00     | 0.00     | 0.00     | 0.00     | 0.00     | 0.00     | 0.00     | 0.00     | 0.00     | 0.00     | 0.00    | 0.00 |
| GH101      |          | 0.00    | 0.00     | 0.00     | 0.00     | 0.00     | 0.00     | 0.02     | 0.00     | 0.00     | 0.00     | 0.00     | 0.00    | 0.00 |
| GH81       |          | 0.00    | 0.00     | 0.00     | 0.00     | 0.00     | 0.00     | 0.00     | 0.00     | 0.00     | 0.00     | 0.00     | 0.00    | 0.00 |
| GT93       |          | 0.00    | 0.00     | 0.00     | 0.00     | 0.00     | 0.00     | 0.00     | 0.00     | 0.00     | 0.00     | 0.00     | 0.00    | 0.00 |
| GT63       |          | 0.00    | 0.00     | 0.00     | 0.00     | 0.00     | 0.00     | 0.00     | 0.00     | 0.00     | 0.00     | 0.00     | 0.00    | 0.00 |
| CE11       |          | 0.21    | 0.23     | 0.00     | 0.17     | 0.27     | 0.18     | 0.15     | 0.31     | 0.42     | 0.20     | 0.24     | 0.26    | 0.37 |
| GT19       |          | 0.09    | 0.16     | 0.03     | 0.10     | 0.08     | 0.09     | 0.11     | 0.28     | 0.33     | 0.14     | 0.11     | 0.11    | 0.16 |
| GT33       |          | 0.00    | 0.00     | 0.00     | 0.00     | 0.00     | 0.00     | 0.00     | 0.00     | 0.00     | 0.00     | 0.00     | 0.00    | 0.00 |
| GH21       |          | 0.00    | 0.00     | 0.00     | 0.00     | 0.00     | 0.00     | 0.00     | 0.00     | 0.00     | 0.00     | 0.00     | 0.00    | 0.00 |
| GT68       |          | 0.00    | 0.00     | 0.00     | 0.00     | 0.00     | 0.00     | 0.00     | 0.00     | 0.00     | 0.00     | 0.00     | 0.00    | 0.00 |
| GH89       |          | 0.21    | 0.08     | 0.02     | 0.17     | 0.19     | 0.15     | 0.28     | 0.24     | 0.16     | 0.32     | 0.24     | 0.10    | 0.00 |
| GT82       |          | 0.00    | 0.00     | 0.00     | 0.00     | 0.00     | 0.00     | 0.00     | 0.00     | 0.02     | 0.02     | 0.00     | 0.00    | 0.00 |
| GH30       |          | 0.13    | 0.08     | 0.01     | 0.15     | 0.16     | 0.23     | 0.15     | 0.31     | 0.26     | 0.39     | 0.22     | 0.19    | 0.10 |
| GH20       |          | 0.91    | 0.63     | 0.07     | 0.85     | 0.96     | 0.77     | 1.08     | 1.18     | 0.98     | 1.07     | 1.36     | 0.96    | 0.31 |
| GH52       |          | 0.00    | 0.00     | 0.00     | 0.00     | 0.00     | 0.00     | 0.00     | 0.00     | 0.00     | 0.00     | 0.00     | 0.00    | 0.00 |
| GT84       |          | 0.03    | 0.11     | 0.00     | 0.00     | 0.03     | 0.03     | 0.00     | 0.00     | 0.02     | 0.00     | 0.00     | 0.02    | 0.00 |
| GT15       |          | 0.00    | 0.00     | 0.00     | 0.00     | 0.00     | 0.00     | 0.00     | 0.00     | 0.00     | 0.00     | 0.00     | 0.00    | 0.00 |
| GH93       |          | 0.00    | 0.00     | 0.00     | 0.00     | 0.00     | 0.00     | 0.03     | 0.00     | 0.00     | 0.00     | 0.00     | 0.00    | 0.00 |
| PL16       |          | 0.00    | 0.00     | 0.00     | 0.00     | 0.00     | 0.00     | 0.00     | 0.00     | 0.00     | 0.00     | 0.00     | 0.00    | 0.00 |
| GH26       |          | 0.13    | 0.14     | 0.00     | 0.11     | 0.13     | 0.09     | 0.20     | 0.18     | 0.30     | 0.17     | 0.15     | 0.15    | 0.16 |



| CAZY_group | DA-AD-39 | DA-AD-4 | DA-AD-40 | DA-AD-41 | DA-AD-42 | DA-AD-43 | DA-AD-44 | DA-AD-45 | DA-AD-46 | DA-AD-47 | DA-AD-48 | DA-AD-49 | DA-AD-5 |
|------------|----------|---------|----------|----------|----------|----------|----------|----------|----------|----------|----------|----------|---------|
| GT52       |          | 0.00    | 0.00     | 0.00     | 0.00     | 0.00     | 0.00     | 0.00     | 0.00     | 0.00     | 0.00     | 0.00     | 0.00    |
| GT64       |          | 0.00    | 0.00     | 0.00     | 0.00     | 0.00     | 0.00     | 0.00     | 0.00     | 0.00     | 0.00     | 0.00     | 0.00    |
| GT85       |          | 0.00    | 0.00     | 0.00     | 0.00     | 0.00     | 0.00     | 0.00     | 0.00     | 0.00     | 0.00     | 0.00     | 0.00    |
| GT16       |          | 0.00    | 0.00     | 0.00     | 0.00     | 0.00     | 0.00     | 0.00     | 0.00     | 0.00     | 0.00     | 0.00     | 0.00    |
| GH56       |          | 0.00    | 0.00     | 0.00     | 0.00     | 0.00     | 0.00     | 0.00     | 0.00     | 0.00     | 0.00     | 0.00     | 0.00    |
| GT60       |          | 0.00    | 0.00     | 0.00     | 0.00     | 0.00     | 0.00     | 0.00     | 0.00     | 0.00     | 0.00     | 0.00     | 0.00    |
| GH41       |          | 0.00    | 0.00     | 0.00     | 0.00     | 0.00     | 0.00     | 0.00     | 0.00     | 0.00     | 0.00     | 0.00     | 0.00    |
| CE7        |          | 0.08    | 0.05     | 0.00     | 0.09     | 0.11     | 0.08     | 0.09     | 0.21     | 0.09     | 0.17     | 0.22     | 0.11    |
| GH39       |          | 0.06    | 0.05     | 0.00     | 0.04     | 0.03     | 0.06     | 0.03     | 0.03     | 0.07     | 0.03     | 0.09     | 0.06    |
| GT30       |          | 0.21    | 0.14     | 0.04     | 0.16     | 0.18     | 0.14     | 0.17     | 0.26     | 0.37     | 0.29     | 0.26     | 0.26    |
| PL15       |          | 0.07    | 0.00     | 0.00     | 0.04     | 0.09     | 0.06     | 0.16     | 0.03     | 0.02     | 0.10     | 0.09     | 0.01    |
| GH102      |          | 0.04    | 0.01     | 0.00     | 0.03     | 0.03     | 0.01     | 0.01     | 0.01     | 0.02     | 0.02     | 0.00     | 0.01    |



| CAZY_group | DA-AD-50 | DA-AD-51 | DA-AD-52 | DA-AD-53 | DA-AD-54 | DA-AD-55 | DA-AD-56 | DA-AD-57 | DA-AD-58 | DA-AD-59 | DA-AD-6 | DA-AD-60 | DA-AD-61 |
|------------|----------|----------|----------|----------|----------|----------|----------|----------|----------|----------|---------|----------|----------|
| GH29       | 0.66     | 0.62     | 0.33     | 0.36     | 0.59     | 0.82     | 0.61     | 0.72     | 0.56     | 0.56     | 0.53    | 0.83     | 0.78     |
| PL4        | 0.00     | 0.00     | 0.00     | 0.00     | 0.00     | 0.00     | 0.00     | 0.00     | 0.00     | 0.00     | 0.00    | 0.00     | 0.02     |
| GH23       | 1.04     | 0.94     | 0.81     | 0.80     | 1.00     | 1.09     | 1.13     | 0.89     | 0.75     | 0.92     | 0.96    | 0.95     | 0.99     |
| CE6        | 0.08     | 0.01     | 0.04     | 0.00     | 0.03     | 0.01     | 0.00     | 0.04     | 0.02     | 0.02     | 0.00    | 0.03     | 0.03     |
| GH72       | 0.13     | 0.07     | 0.10     | 0.10     | 0.15     | 0.19     | 0.09     | 0.18     | 0.13     | 0.13     | 0.12    | 0.08     | 0.14     |
| GH114      | 0.00     | 0.00     | 0.00     | 0.00     | 0.00     | 0.00     | 0.00     | 0.00     | 0.00     | 0.00     | 0.00    | 0.00     | 0.00     |
| GH78       | 0.74     | 0.36     | 0.20     | 0.47     | 0.55     | 0.96     | 0.89     | 0.72     | 0.77     | 0.53     | 0.43    | 0.85     | 0.68     |
| PL19       | 0.00     | 0.00     | 0.00     | 0.00     | 0.00     | 0.00     | 0.00     | 0.00     | 0.00     | 0.00     | 0.00    | 0.00     | 0.00     |
| GT27       | 0.02     | 0.00     | 0.00     | 0.00     | 0.00     | 0.00     | 0.00     | 0.00     | 0.00     | 0.00     | 0.00    | 0.00     | 0.00     |
| GH5        | 0.85     | 0.88     | 0.49     | 0.38     | 0.60     | 0.53     | 0.43     | 0.49     | 0.50     | 0.51     | 0.43    | 0.34     | 0.25     |
| GT40       | 0.00     | 0.00     | 0.00     | 0.00     | 0.00     | 0.00     | 0.00     | 0.00     | 0.00     | 0.00     | 0.00    | 0.00     | 0.00     |
| CE13       | 0.00     | 0.00     | 0.00     | 0.00     | 0.00     | 0.00     | 0.00     | 0.00     | 0.01     | 0.00     | 0.00    | 0.00     | 0.00     |
| GT37       | 0.00     | 0.00     | 0.00     | 0.00     | 0.00     | 0.00     | 0.00     | 0.00     | 0.00     | 0.00     | 0.00    | 0.00     | 0.00     |
| GH33       | 0.20     | 0.19     | 0.02     | 0.14     | 0.14     | 0.29     | 0.17     | 0.21     | 0.17     | 0.18     | 0.19    | 0.24     | 0.20     |
| GT65       | 0.00     | 0.00     | 0.00     | 0.00     | 0.00     | 0.00     | 0.00     | 0.00     | 0.00     | 0.00     | 0.00    | 0.00     | 0.00     |
| GH86       | 0.00     | 0.00     | 0.00     | 0.00     | 0.00     | 0.01     | 0.00     | 0.00     | 0.00     | 0.00     | 0.00    | 0.00     | 0.00     |
| GH123      | 0.13     | 0.06     | 0.06     | 0.06     | 0.09     | 0.16     | 0.16     | 0.10     | 0.13     | 0.08     | 0.10    | 0.14     | 0.07     |
| GH96       | 0.00     | 0.00     | 0.00     | 0.00     | 0.00     | 0.00     | 0.00     | 0.00     | 0.00     | 0.00     | 0.00    | 0.00     | 0.00     |
| GH14       | 0.00     | 0.00     | 0.00     | 0.00     | 0.00     | 0.00     | 0.00     | 0.00     | 0.00     | 0.00     | 0.00    | 0.00     | 0.00     |
| CE3        | 0.00     | 0.00     | 0.00     | 0.00     | 0.00     | 0.00     | 0.00     | 0.00     | 0.00     | 0.00     | 0.00    | 0.00     | 0.00     |
| PL10       | 0.16     | 0.12     | 0.00     | 0.06     | 0.15     | 0.10     | 0.11     | 0.09     | 0.09     | 0.08     | 0.05    | 0.08     | 0.07     |
| GT48       | 0.00     | 0.00     | 0.00     | 0.00     | 0.00     | 0.00     | 0.00     | 0.00     | 0.00     | 0.00     | 0.00    | 0.00     | 0.00     |
| PL6        | 0.02     | 0.00     | 0.00     | 0.00     | 0.00     | 0.00     | 0.00     | 0.00     | 0.00     | 0.00     | 0.00    | 0.00     | 0.00     |
| GT83       | 0.06     | 0.01     | 0.05     | 0.06     | 0.03     | 0.09     | 0.10     | 0.09     | 0.09     | 0.04     | 0.06    | 0.06     | 0.05     |
| GH126      | 0.00     | 0.00     | 0.00     | 0.00     | 0.00     | 0.00     | 0.00     | 0.00     | 0.00     | 0.00     | 0.00    | 0.00     | 0.00     |
| GH9        | 0.49     | 0.25     | 0.29     | 0.08     | 0.10     | 0.48     | 0.19     | 0.21     | 0.30     | 0.30     | 0.30    | 0.07     | 0.05     |
| GH75       | 0.00     | 0.00     | 0.00     | 0.00     | 0.00     | 0.00     | 0.00     | 0.00     | 0.00     | 0.00     | 0.00    | 0.00     | 0.00     |
| GT71       | 0.00     | 0.00     | 0.00     | 0.00     | 0.00     | 0.00     | 0.00     | 0.00     | 0.00     | 0.00     | 0.00    | 0.00     | 0.00     |
| GH46       | 0.00     | 0.00     | 0.00     | 0.00     | 0.00     | 0.00     | 0.00     | 0.00     | 0.00     | 0.00     | 0.00    | 0.00     | 0.00     |
| GT61       | 0.00     | 0.00     | 0.00     | 0.00     | 0.00     | 0.00     | 0.00     | 0.00     | 0.00     | 0.00     | 0.00    | 0.00     | 0.00     |
| GT3        | 0.22     | 0.22     | 0.17     | 0.12     | 0.18     | 0.27     | 0.13     | 0.13     | 0.13     | 0.12     | 0.21    | 0.18     | 0.15     |
| PL3        | 0.00     | 0.00     | 0.00     | 0.00     | 0.00     | 0.00     | 0.00     | 0.00     | 0.00     | 0.00     | 0.00    | 0.00     | 0.00     |
| GH108      | 0.03     | 0.04     | 0.01     | 0.01     | 0.03     | 0.02     | 0.03     | 0.03     | 0.05     | 0.02     | 0.09    | 0.03     | 0.05     |
| GT56       | 0.00     | 0.00     | 0.00     | 0.00     | 0.00     | 0.01     | 0.00     | 0.00     | 0.00     | 0.00     | 0.00    | 0.00     | 0.00     |
| PL11       | 0.20     | 0.16     | 0.02     | 0.13     | 0.08     | 0.10     | 0.14     | 0.12     | 0.11     | 0.09     | 0.06    | 0.13     | 0.06     |
| GH45       | 0.00     | 0.00     | 0.00     | 0.00     | 0.00     | 0.00     | 0.00     | 0.00     | 0.01     | 0.00     | 0.00    | 0.00     | 0.00     |
| GT34       | 0.00     | 0.00     | 0.00     | 0.00     | 0.00     | 0.00     | 0.00     | 0.00     | 0.00     | 0.00     | 0.00    | 0.00     | 0.00     |
| PL14       | 0.00     | 0.00     | 0.00     | 0.00     | 0.00     | 0.00     | 0.00     | 0.00     | 0.00     | 0.00     | 0.00    | 0.00     | 0.00     |
| GH19       | 0.00     | 0.00     | 0.00     | 0.02     | 0.01     | 0.00     | 0.00     | 0.00     | 0.01     | 0.02     | 0.00    | 0.00     | 0.00     |
| GH118      | 0.00     | 0.00     | 0.00     | 0.00     | 0.00     | 0.00     | 0.00     | 0.00     | 0.00     | 0.00     | 0.00    | 0.00     | 0.00     |
| GH82       | 0.00     | 0.00     | 0.00     | 0.00     | 0.00     | 0.00     | 0.00     | 0.00     | 0.00     | 0.00     | 0.00    | 0.00     | 0.00     |
| GH76       | 0.20     | 0.03     | 0.00     | 0.11     | 0.03     | 0.02     | 0.19     | 0.19     | 0.13     | 0.18     | 0.07    | 0.20     | 0.16     |
| GT4        | 1.95     | 1.59     | 1.06     | 1.40     | 1.80     | 1.93     | 1.52     | 2.20     | 1.61     | 1.42     | 1.85    | 1.45     | 1.57     |
| GT87       | 0.02     | 0.00     | 0.00     | 0.01     | 0.01     | 0.00     | 0.03     | 0.01     | 0.00     | 0.00     | 0.00    | 0.00     | 0.01     |
| GH24       | 0.13     | 0.10     | 0.05     | 0.05     | 0.15     | 0.12     | 0.11     | 0.06     | 0.06     | 0.12     | 0.07    | 0.10     | 0.10     |
| GH90       | 0.00     | 0.00     | 0.00     | 0.00     | 0.00     | 0.00     | 0.00     | 0.00     | 0.00     | 0.00     | 0.00    | 0.00     | 0.00     |
| GH57       | 0.13     | 0.22     | 0.14     | 0.06     | 0.12     | 0.15     | 0.11     | 0.11     | 0.12     | 0.09     | 0.09    | 0.11     | 0.09     |
| GH36       | 0.82     | 0.59     | 0.50     | 0.49     | 0.82     | 0.70     | 0.49     | 0.65     | 0.65     | 0.60     | 0.66    | 0.58     | 0.85     |
| GT46       | 0.00     | 0.00     | 0.00     | 0.00     | 0.00     | 0.00     | 0.00     | 0.00     | 0.00     | 0.00     | 0.00    | 0.00     | 0.00     |
| GH66       | 0.05     | 0.03     | 0.02     | 0.03     | 0.04     | 0.03     | 0.04     | 0.04     | 0.03     | 0.03     | 0.00    | 0.03     | 0.02     |



| CAZY_group | DA-AD-50 | DA-AD-51 | DA-AD-52 | DA-AD-53 | DA-AD-54 | DA-AD-55 | DA-AD-56 | DA-AD-57 | DA-AD-58 | DA-AD-59 | DA-AD-6 | DA-AD-60 | DA-AD-61 |
|------------|----------|----------|----------|----------|----------|----------|----------|----------|----------|----------|---------|----------|----------|
| GT76       | 0.00     | 0.00     | 0.00     | 0.00     | 0.00     | 0.00     | 0.00     | 0.00     | 0.00     | 0.00     | 0.00    | 0.00     | 0.00     |
| GT32       | 0.17     | 0.01     | 0.11     | 0.09     | 0.11     | 0.13     | 0.07     | 0.11     | 0.11     | 0.07     | 0.12    | 0.07     | 0.06     |
| GT47       | 0.06     | 0.06     | 0.05     | 0.02     | 0.02     | 0.06     | 0.04     | 0.04     | 0.02     | 0.04     | 0.02    | 0.04     | 0.06     |
| GH84       | 0.11     | 0.13     | 0.04     | 0.04     | 0.08     | 0.14     | 0.13     | 0.12     | 0.06     | 0.04     | 0.10    | 0.08     | 0.09     |
| GH83       | 0.00     | 0.00     | 0.00     | 0.00     | 0.00     | 0.00     | 0.00     | 0.00     | 0.00     | 0.00     | 0.00    | 0.00     | 0.00     |
| GT59       | 0.00     | 0.00     | 0.00     | 0.00     | 0.00     | 0.00     | 0.00     | 0.00     | 0.00     | 0.00     | 0.00    | 0.00     | 0.00     |
| GH34       | 0.00     | 0.00     | 0.00     | 0.00     | 0.00     | 0.00     | 0.00     | 0.00     | 0.00     | 0.00     | 0.00    | 0.00     | 0.00     |
| GT14       | 0.05     | 0.04     | 0.00     | 0.00     | 0.01     | 0.02     | 0.04     | 0.04     | 0.02     | 0.01     | 0.02    | 0.03     | 0.00     |
| GH47       | 0.00     | 0.00     | 0.00     | 0.00     | 0.00     | 0.00     | 0.00     | 0.00     | 0.00     | 0.00     | 0.00    | 0.00     | 0.00     |
| GH97       | 0.99     | 0.80     | 0.25     | 0.44     | 0.84     | 0.83     | 0.86     | 0.78     | 0.81     | 0.65     | 0.64    | 0.54     | 0.69     |
| GH50       | 0.05     | 0.00     | 0.00     | 0.00     | 0.00     | 0.02     | 0.04     | 0.02     | 0.02     | 0.02     | 0.06    | 0.00     | 0.03     |
| GT26       | 0.13     | 0.28     | 0.21     | 0.13     | 0.20     | 0.22     | 0.16     | 0.29     | 0.21     | 0.17     | 0.15    | 0.23     | 0.17     |
| GH18       | 0.75     | 0.32     | 0.38     | 0.51     | 0.39     | 0.49     | 0.53     | 0.63     | 0.42     | 0.47     | 0.64    | 0.61     | 0.50     |
| GH37       | 0.00     | 0.00     | 0.00     | 0.02     | 0.00     | 0.01     | 0.00     | 0.00     | 0.00     | 0.00     | 0.01    | 0.01     | 0.01     |
| PL13       | 0.06     | 0.01     | 0.00     | 0.02     | 0.01     | 0.02     | 0.03     | 0.04     | 0.05     | 0.03     | 0.03    | 0.04     | 0.03     |
| GH27       | 0.16     | 0.23     | 0.21     | 0.19     | 0.13     | 0.16     | 0.16     | 0.19     | 0.24     | 0.21     | 0.22    | 0.13     | 0.27     |
| GT54       | 0.00     | 0.00     | 0.00     | 0.00     | 0.00     | 0.00     | 0.00     | 0.00     | 0.00     | 0.00     | 0.00    | 0.00     | 0.00     |
| GT91       | 0.00     | 0.00     | 0.00     | 0.00     | 0.00     | 0.00     | 0.00     | 0.00     | 0.00     | 0.00     | 0.00    | 0.00     | 0.00     |
| GT72       | 0.00     | 0.00     | 0.00     | 0.00     | 0.00     | 0.00     | 0.00     | 0.00     | 0.00     | 0.00     | 0.00    | 0.00     | 0.00     |
| GH67       | 0.08     | 0.01     | 0.04     | 0.06     | 0.12     | 0.12     | 0.11     | 0.05     | 0.07     | 0.07     | 0.08    | 0.04     | 0.02     |
| GH12       | 0.00     | 0.00     | 0.00     | 0.00     | 0.00     | 0.00     | 0.00     | 0.00     | 0.00     | 0.00     | 0.00    | 0.00     | 0.00     |
| GH91       | 0.03     | 0.00     | 0.02     | 0.01     | 0.00     | 0.02     | 0.07     | 0.02     | 0.03     | 0.02     | 0.01    | 0.06     | 0.03     |
| GT69       | 0.00     | 0.00     | 0.00     | 0.00     | 0.00     | 0.00     | 0.00     | 0.00     | 0.00     | 0.00     | 0.00    | 0.00     | 0.00     |
| GH106      | 0.19     | 0.14     | 0.13     | 0.15     | 0.21     | 0.21     | 0.24     | 0.20     | 0.20     | 0.22     | 0.13    | 0.18     | 0.17     |
| GT62       | 0.00     | 0.00     | 0.00     | 0.00     | 0.00     | 0.00     | 0.00     | 0.00     | 0.00     | 0.00     | 0.00    | 0.00     | 0.00     |
| GH17       | 0.00     | 0.00     | 0.00     | 0.00     | 0.00     | 0.00     | 0.00     | 0.00     | 0.00     | 0.00     | 0.00    | 0.00     | 0.00     |
| GH88       | 0.33     | 0.17     | 0.11     | 0.13     | 0.18     | 0.32     | 0.39     | 0.30     | 0.34     | 0.28     | 0.21    | 0.44     | 0.34     |
| CE5        | 0.00     | 0.00     | 0.00     | 0.00     | 0.00     | 0.00     | 0.00     | 0.00     | 0.00     | 0.00     | 0.00    | 0.00     | 0.00     |
| GT8        | 0.08     | 0.10     | 0.12     | 0.08     | 0.07     | 0.13     | 0.09     | 0.10     | 0.08     | 0.04     | 0.10    | 0.08     | 0.09     |
| GT50       | 0.00     | 0.00     | 0.00     | 0.00     | 0.00     | 0.00     | 0.00     | 0.00     | 0.00     | 0.00     | 0.00    | 0.00     | 0.00     |
| GT20       | 0.06     | 0.03     | 0.00     | 0.01     | 0.04     | 0.09     | 0.09     | 0.07     | 0.09     | 0.09     | 0.08    | 0.13     | 0.08     |
| PL9        | 0.17     | 0.16     | 0.07     | 0.01     | 0.07     | 0.09     | 0.14     | 0.10     | 0.08     | 0.13     | 0.03    | 0.04     | 0.08     |
| GH55       | 0.03     | 0.06     | 0.01     | 0.00     | 0.02     | 0.04     | 0.01     | 0.04     | 0.02     | 0.01     | 0.02    | 0.00     | 0.03     |
| GH64       | 0.00     | 0.00     | 0.00     | 0.00     | 0.00     | 0.00     | 0.00     | 0.00     | 0.00     | 0.00     | 0.01    | 0.00     | 0.00     |
| GH127      | 0.35     | 0.23     | 0.06     | 0.22     | 0.32     | 0.35     | 0.31     | 0.41     | 0.26     | 0.19     | 0.34    | 0.21     | 0.20     |
| GH103      | 0.00     | 0.00     | 0.00     | 0.00     | 0.00     | 0.00     | 0.00     | 0.00     | 0.00     | 0.00     | 0.00    | 0.00     | 0.00     |
| GH3        | 2.82     | 2.07     | 1.14     | 1.90     | 2.63     | 1.14     | 2.92     | 2.36     | 2.60     | 2.40     | 1.97    | 2.05     | 2.32     |
| GT45       | 0.00     | 0.00     | 0.00     | 0.00     | 0.00     | 0.00     | 0.00     | 0.00     | 0.00     | 0.00     | 0.00    | 0.00     | 0.00     |
| GT74       | 0.00     | 0.00     | 0.00     | 0.00     | 0.00     | 0.00     | 0.00     | 0.00     | 0.00     | 0.00     | 0.00    | 0.00     | 0.00     |
| GT90       | 0.00     | 0.00     | 0.00     | 0.00     | 0.00     | 0.00     | 0.00     | 0.00     | 0.00     | 0.00     | 0.00    | 0.00     | 0.00     |
| GH116      | 0.06     | 0.09     | 0.01     | 0.01     | 0.04     | 0.07     | 0.06     | 0.04     | 0.08     | 0.09     | 0.05    | 0.03     | 0.02     |
| GH31       | 0.93     | 0.80     | 0.45     | 0.62     | 0.89     | 1.03     | 0.89     | 1.14     | 1.02     | 0.78     | 0.64    | 0.79     | 0.94     |
| GT12       | 0.00     | 0.00     | 0.00     | 0.00     | 0.00     | 0.00     | 0.00     | 0.00     | 0.00     | 0.00     | 0.00    | 0.00     | 0.00     |
| CE1        | 0.61     | 0.33     | 0.24     | 0.25     | 0.41     | 0.44     | 0.57     | 0.41     | 0.47     | 0.27     | 0.31    | 0.37     | 0.39     |
| GH121      | 0.00     | 0.00     | 0.00     | 0.00     | 0.00     | 0.01     | 0.00     | 0.00     | 0.00     | 0.00     | 0.00    | 0.00     | 0.00     |
| GH79       | 0.00     | 0.00     | 0.00     | 0.03     | 0.00     | 0.01     | 0.00     | 0.02     | 0.00     | 0.00     | 0.00    | 0.00     | 0.00     |
| GT73       | 0.00     | 0.00     | 0.00     | 0.01     | 0.00     | 0.00     | 0.00     | 0.00     | 0.00     | 0.00     | 0.00    | 0.00     | 0.00     |
| GH77       | 0.72     | 0.62     | 0.51     | 0.70     | 0.63     | 0.61     | 0.53     | 0.61     | 0.59     | 0.49     | 0.64    | 0.61     | 0.72     |
| PL17       | 0.00     | 0.00     | 0.00     | 0.00     | 0.00     | 0.00     | 0.00     | 0.00     | 0.00     | 0.02     | 0.00    | 0.00     | 0.00     |
| PL8        | 0.38     | 0.16     | 0.04     | 0.08     | 0.13     | 0.26     | 0.16     | 0.19     | 0.28     | 0.14     | 0.12    | 0.21     | 0.24     |

| CAZY_group | DA-AD-50 | DA-AD-51 | DA-AD-52 | DA-AD-53 | DA-AD-54 | DA-AD-55 | DA-AD-56 | DA-AD-57 | DA-AD-58 | DA-AD-59 | DA-AD-60 | DA-AD-61 | DA-AD-62 | DA-AD-63 |
|------------|----------|----------|----------|----------|----------|----------|----------|----------|----------|----------|----------|----------|----------|----------|
| CE9        |          | 0.30     | 0.23     | 0.19     | 0.20     | 0.26     | 0.35     | 0.31     | 0.37     | 0.30     | 0.21     | 0.22     | 0.23     | 0.41     |
| CE15       |          | 0.03     | 0.01     | 0.00     | 0.01     | 0.00     | 0.02     | 0.03     | 0.04     | 0.01     | 0.01     | 0.03     | 0.00     | 0.01     |
| GT79       |          | 0.00     | 0.00     | 0.00     | 0.00     | 0.00     | 0.00     | 0.00     | 0.00     | 0.00     | 0.00     | 0.00     | 0.00     | 0.00     |
| GT10       |          | 0.00     | 0.00     | 0.00     | 0.00     | 0.00     | 0.00     | 0.03     | 0.02     | 0.01     | 0.00     | 0.00     | 0.03     | 0.01     |
| GH119      |          | 0.00     | 0.00     | 0.00     | 0.00     | 0.00     | 0.00     | 0.00     | 0.00     | 0.00     | 0.00     | 0.00     | 0.00     | 0.00     |
| GH16       |          | 0.20     | 0.13     | 0.10     | 0.06     | 0.16     | 0.21     | 0.10     | 0.22     | 0.22     | 0.20     | 0.13     | 0.28     | 0.15     |
| GH43       |          | 2.53     | 1.53     | 0.91     | 1.01     | 2.06     | 2.36     | 2.24     | 2.61     | 2.21     | 1.43     | 1.45     | 1.30     | 1.33     |
| GH51       |          | 0.49     | 0.38     | 0.33     | 0.37     | 0.49     | 0.56     | 0.57     | 0.60     | 0.47     | 0.35     | 0.44     | 0.37     | 0.49     |
| GT35       |          | 0.99     | 0.80     | 0.74     | 0.94     | 0.99     | 0.78     | 0.73     | 0.73     | 0.75     | 0.73     | 0.87     | 0.73     | 0.82     |
| GT25       |          | 0.00     | 0.00     | 0.00     | 0.00     | 0.00     | 0.00     | 0.00     | 0.00     | 0.00     | 0.00     | 0.00     | 0.03     | 0.00     |
| GT2        |          | 5.05     | 4.78     | 3.03     | 2.98     | 3.92     | 4.26     | 4.53     | 4.52     | 3.99     | 3.36     | 3.60     | 3.40     | 3.90     |
| GT51       |          | 0.74     | 1.01     | 0.63     | 0.69     | 0.88     | 1.05     | 0.84     | 0.89     | 0.73     | 0.58     | 0.86     | 0.68     | 0.73     |
| GH107      |          | 0.00     | 0.00     | 0.00     | 0.00     | 0.00     | 0.00     | 0.00     | 0.00     | 0.00     | 0.00     | 0.00     | 0.00     | 0.00     |
| GH7        |          | 0.00     | 0.00     | 0.00     | 0.00     | 0.00     | 0.00     | 0.00     | 0.00     | 0.00     | 0.00     | 0.00     | 0.00     | 0.00     |
| GT7        |          | 0.00     | 0.00     | 0.00     | 0.00     | 0.00     | 0.00     | 0.00     | 0.00     | 0.00     | 0.00     | 0.00     | 0.00     | 0.00     |
| GT36       |          | 0.00     | 0.00     | 0.00     | 0.00     | 0.00     | 0.00     | 0.00     | 0.00     | 0.00     | 0.00     | 0.00     | 0.00     | 0.00     |
| PL7        |          | 0.00     | 0.00     | 0.00     | 0.00     | 0.00     | 0.00     | 0.00     | 0.01     | 0.00     | 0.00     | 0.00     | 0.00     | 0.00     |
| GH110      |          | 0.09     | 0.07     | 0.00     | 0.03     | 0.08     | 0.12     | 0.13     | 0.13     | 0.10     | 0.06     | 0.09     | 0.14     | 0.10     |
| GT21       |          | 0.00     | 0.00     | 0.00     | 0.00     | 0.00     | 0.00     | 0.00     | 0.00     | 0.00     | 0.00     | 0.00     | 0.00     | 0.00     |
| GH62       |          | 0.00     | 0.00     | 0.00     | 0.00     | 0.00     | 0.00     | 0.00     | 0.00     | 0.00     | 0.00     | 0.00     | 0.00     | 0.00     |
| GH125      |          | 0.19     | 0.14     | 0.07     | 0.11     | 0.10     | 0.17     | 0.21     | 0.17     | 0.17     | 0.21     | 0.10     | 0.13     | 0.11     |
| GH117      |          | 0.09     | 0.07     | 0.01     | 0.03     | 0.04     | 0.06     | 0.13     | 0.09     | 0.08     | 0.03     | 0.07     | 0.11     | 0.06     |
| GH68       |          | 0.00     | 0.00     | 0.00     | 0.00     | 0.00     | 0.00     | 0.00     | 0.00     | 0.00     | 0.00     | 0.00     | 0.00     | 0.00     |
| GH85       |          | 0.00     | 0.00     | 0.00     | 0.00     | 0.00     | 0.03     | 0.03     | 0.03     | 0.00     | 0.00     | 0.00     | 0.01     | 0.00     |
| GH92       |          | 1.79     | 0.81     | 0.44     | 0.94     | 1.10     | 1.82     | 1.76     | 1.51     | 1.53     | 1.21     | 1.08     | 1.44     | 1.28     |
| GH40       |          | 0.00     | 0.00     | 0.00     | 0.00     | 0.00     | 0.00     | 0.00     | 0.00     | 0.00     | 0.00     | 0.00     | 0.00     | 0.00     |
| GT49       |          | 0.00     | 0.00     | 0.00     | 0.00     | 0.00     | 0.00     | 0.00     | 0.00     | 0.00     | 0.00     | 0.00     | 0.00     | 0.00     |
| GH112      |          | 0.09     | 0.16     | 0.13     | 0.17     | 0.12     | 0.07     | 0.11     | 0.15     | 0.10     | 0.16     | 0.15     | 0.13     | 0.17     |
| GT67       |          | 0.00     | 0.00     | 0.00     | 0.00     | 0.00     | 0.00     | 0.00     | 0.00     | 0.00     | 0.00     | 0.00     | 0.00     | 0.00     |
| CE8        |          | 0.25     | 0.12     | 0.11     | 0.15     | 0.26     | 0.18     | 0.31     | 0.20     | 0.21     | 0.18     | 0.13     | 0.21     | 0.18     |
| GT86       |          | 0.00     | 0.00     | 0.00     | 0.00     | 0.00     | 0.00     | 0.00     | 0.00     | 0.00     | 0.00     | 0.00     | 0.00     | 0.00     |
| GH101      |          | 0.00     | 0.00     | 0.00     | 0.00     | 0.00     | 0.01     | 0.00     | 0.00     | 0.00     | 0.00     | 0.01     | 0.01     | 0.01     |
| GH81       |          | 0.00     | 0.00     | 0.00     | 0.00     | 0.00     | 0.00     | 0.00     | 0.00     | 0.00     | 0.00     | 0.00     | 0.00     | 0.01     |
| GT93       |          | 0.00     | 0.00     | 0.00     | 0.00     | 0.00     | 0.00     | 0.00     | 0.00     | 0.00     | 0.00     | 0.00     | 0.00     | 0.00     |
| GT63       |          | 0.00     | 0.00     | 0.00     | 0.00     | 0.00     | 0.00     | 0.00     | 0.00     | 0.00     | 0.00     | 0.00     | 0.00     | 0.00     |
| CE11       |          | 0.22     | 0.26     | 0.19     | 0.15     | 0.30     | 0.29     | 0.39     | 0.27     | 0.23     | 0.22     | 0.23     | 0.17     | 0.17     |
| GT19       |          | 0.11     | 0.19     | 0.08     | 0.07     | 0.17     | 0.14     | 0.20     | 0.13     | 0.13     | 0.12     | 0.10     | 0.10     | 0.19     |
| GT33       |          | 0.00     | 0.00     | 0.00     | 0.00     | 0.00     | 0.00     | 0.00     | 0.00     | 0.00     | 0.00     | 0.00     | 0.00     | 0.00     |
| GH21       |          | 0.00     | 0.00     | 0.00     | 0.00     | 0.00     | 0.00     | 0.00     | 0.00     | 0.00     | 0.00     | 0.00     | 0.00     | 0.00     |
| GT68       |          | 0.00     | 0.00     | 0.00     | 0.00     | 0.00     | 0.00     | 0.00     | 0.00     | 0.00     | 0.00     | 0.00     | 0.00     | 0.00     |
| GH89       |          | 0.20     | 0.20     | 0.08     | 0.04     | 0.14     | 0.17     | 0.24     | 0.25     | 0.21     | 0.27     | 0.13     | 0.24     | 0.20     |
| GT82       |          | 0.00     | 0.00     | 0.00     | 0.00     | 0.00     | 0.00     | 0.00     | 0.00     | 0.00     | 0.00     | 0.00     | 0.00     | 0.00     |
| GH30       |          | 0.16     | 0.25     | 0.08     | 0.11     | 0.15     | 0.19     | 0.23     | 0.22     | 0.23     | 0.17     | 0.21     | 0.16     | 0.20     |
| GH20       |          | 1.11     | 0.80     | 0.29     | 0.62     | 0.61     | 1.12     | 1.23     | 1.45     | 0.94     | 0.73     | 0.93     | 1.26     | 0.81     |
| GH52       |          | 0.00     | 0.00     | 0.00     | 0.00     | 0.00     | 0.00     | 0.00     | 0.00     | 0.00     | 0.00     | 0.00     | 0.00     | 0.00     |
| GT84       |          | 0.00     | 0.00     | 0.05     | 0.02     | 0.00     | 0.01     | 0.00     | 0.02     | 0.05     | 0.00     | 0.07     | 0.04     | 0.01     |
| GT15       |          | 0.00     | 0.00     | 0.00     | 0.00     | 0.00     | 0.00     | 0.00     | 0.00     | 0.00     | 0.00     | 0.00     | 0.00     | 0.00     |
| GH93       |          | 0.02     | 0.00     | 0.00     | 0.00     | 0.00     | 0.00     | 0.00     | 0.00     | 0.00     | 0.01     | 0.00     | 0.00     | 0.00     |
| PL16       |          | 0.00     | 0.00     | 0.00     | 0.00     | 0.00     | 0.00     | 0.00     | 0.00     | 0.00     | 0.00     | 0.00     | 0.00     | 0.00     |
| GH26       |          | 0.27     | 0.22     | 0.08     | 0.14     | 0.22     | 0.19     | 0.11     | 0.14     | 0.18     | 0.12     | 0.19     | 0.10     | 0.03     |



| CAZY_group | DA-AD-50 | DA-AD-51 | DA-AD-52 | DA-AD-53 | DA-AD-54 | DA-AD-55 | DA-AD-56 | DA-AD-57 | DA-AD-58 | DA-AD-59 | DA-AD-60 | DA-AD-61 | DA-AD-62 | DA-AD-63 |
|------------|----------|----------|----------|----------|----------|----------|----------|----------|----------|----------|----------|----------|----------|----------|
| GT52       |          | 0.00     | 0.00     | 0.00     | 0.00     | 0.00     | 0.00     | 0.00     | 0.00     | 0.00     | 0.00     | 0.00     | 0.00     | 0.00     |
| GT64       |          | 0.00     | 0.00     | 0.00     | 0.00     | 0.00     | 0.00     | 0.00     | 0.00     | 0.00     | 0.00     | 0.00     | 0.00     | 0.00     |
| GT85       |          | 0.00     | 0.00     | 0.00     | 0.00     | 0.00     | 0.00     | 0.00     | 0.00     | 0.00     | 0.00     | 0.00     | 0.00     | 0.00     |
| GT16       |          | 0.00     | 0.00     | 0.00     | 0.00     | 0.00     | 0.00     | 0.00     | 0.00     | 0.00     | 0.00     | 0.00     | 0.00     | 0.00     |
| GH56       |          | 0.00     | 0.00     | 0.00     | 0.00     | 0.00     | 0.00     | 0.00     | 0.00     | 0.00     | 0.00     | 0.00     | 0.00     | 0.00     |
| GT60       |          | 0.00     | 0.00     | 0.00     | 0.00     | 0.00     | 0.00     | 0.00     | 0.00     | 0.00     | 0.00     | 0.00     | 0.00     | 0.00     |
| GH41       |          | 0.00     | 0.00     | 0.00     | 0.00     | 0.00     | 0.00     | 0.00     | 0.00     | 0.00     | 0.00     | 0.00     | 0.00     | 0.00     |
| CE7        |          | 0.13     | 0.06     | 0.05     | 0.02     | 0.06     | 0.05     | 0.14     | 0.12     | 0.06     | 0.06     | 0.05     | 0.08     | 0.14     |
| GH39       |          | 0.11     | 0.04     | 0.04     | 0.03     | 0.05     | 0.05     | 0.00     | 0.05     | 0.02     | 0.03     | 0.05     | 0.07     | 0.01     |
| GT30       |          | 0.28     | 0.23     | 0.17     | 0.20     | 0.17     | 0.27     | 0.34     | 0.21     | 0.21     | 0.22     | 0.17     | 0.21     | 0.19     |
| PL15       |          | 0.11     | 0.03     | 0.00     | 0.04     | 0.03     | 0.05     | 0.10     | 0.10     | 0.09     | 0.06     | 0.03     | 0.18     | 0.08     |
| GH102      |          | 0.02     | 0.03     | 0.00     | 0.01     | 0.03     | 0.01     | 0.00     | 0.03     | 0.01     | 0.01     | 0.07     | 0.00     | 0.02     |

| CAZY_group | DA-AD-62 | DA-AD-63 | DA-AD-64 | DA-AD-65 | DA-AD-66 | DA-AD-67 | DA-AD-68 | DA-AD-69 | DA-AD-7 | DA-AD-70 | DA-AD-71 | DA-AD-72 | DA-AD-73 |
|------------|----------|----------|----------|----------|----------|----------|----------|----------|---------|----------|----------|----------|----------|
| GH29       | 0.51     | 0.59     | 0.45     | 0.71     | 0.72     | 0.40     | 0.58     | 0.66     | 0.66    | 0.74     | 0.57     | 0.97     | 0.25     |
| PL4        | 0.00     | 0.00     | 0.00     | 0.00     | 0.00     | 0.00     | 0.00     | 0.00     | 0.01    | 0.00     | 0.00     | 0.00     | 0.00     |
| GH23       | 0.74     | 1.03     | 0.83     | 0.94     | 0.94     | 1.07     | 0.91     | 0.90     | 0.91    | 0.89     | 0.83     | 1.17     | 0.77     |
| CE6        | 0.01     | 0.01     | 0.03     | 0.02     | 0.01     | 0.00     | 0.00     | 0.01     | 0.02    | 0.03     | 0.07     | 0.05     | 0.01     |
| GH72       | 0.05     | 0.06     | 0.11     | 0.07     | 0.05     | 0.10     | 0.13     | 0.15     | 0.09    | 0.08     | 0.15     | 0.14     | 0.08     |
| GH114      | 0.00     | 0.00     | 0.00     | 0.00     | 0.00     | 0.00     | 0.00     | 0.00     | 0.00    | 0.00     | 0.00     | 0.00     | 0.00     |
| GH78       | 0.50     | 0.81     | 0.38     | 0.63     | 0.59     | 0.35     | 0.44     | 0.56     | 0.86    | 0.58     | 0.78     | 0.83     | 0.40     |
| PL19       | 0.00     | 0.00     | 0.00     | 0.00     | 0.00     | 0.00     | 0.00     | 0.00     | 0.00    | 0.00     | 0.00     | 0.00     | 0.00     |
| GT27       | 0.00     | 0.00     | 0.00     | 0.00     | 0.00     | 0.00     | 0.00     | 0.00     | 0.00    | 0.00     | 0.00     | 0.00     | 0.00     |
| GH5        | 0.52     | 0.63     | 0.39     | 0.37     | 0.26     | 0.30     | 0.54     | 0.53     | 0.49    | 0.56     | 0.61     | 0.34     | 0.25     |
| GT40       | 0.00     | 0.00     | 0.00     | 0.00     | 0.00     | 0.00     | 0.00     | 0.00     | 0.00    | 0.00     | 0.00     | 0.00     | 0.00     |
| CE13       | 0.00     | 0.00     | 0.00     | 0.00     | 0.00     | 0.00     | 0.00     | 0.00     | 0.00    | 0.00     | 0.00     | 0.00     | 0.00     |
| GT37       | 0.00     | 0.00     | 0.00     | 0.00     | 0.00     | 0.00     | 0.00     | 0.00     | 0.00    | 0.00     | 0.00     | 0.00     | 0.00     |
| GH33       | 0.10     | 0.22     | 0.09     | 0.20     | 0.15     | 0.09     | 0.08     | 0.13     | 0.18    | 0.21     | 0.28     | 0.27     | 0.11     |
| GT65       | 0.00     | 0.00     | 0.00     | 0.00     | 0.00     | 0.00     | 0.00     | 0.00     | 0.00    | 0.00     | 0.00     | 0.00     | 0.00     |
| GH86       | 0.00     | 0.02     | 0.00     | 0.01     | 0.00     | 0.00     | 0.00     | 0.00     | 0.00    | 0.01     | 0.00     | 0.00     | 0.00     |
| GH123      | 0.07     | 0.12     | 0.03     | 0.11     | 0.07     | 0.07     | 0.06     | 0.06     | 0.10    | 0.08     | 0.17     | 0.12     | 0.06     |
| GH96       | 0.00     | 0.00     | 0.00     | 0.00     | 0.00     | 0.00     | 0.00     | 0.00     | 0.00    | 0.00     | 0.00     | 0.00     | 0.00     |
| GH14       | 0.00     | 0.00     | 0.00     | 0.00     | 0.00     | 0.00     | 0.00     | 0.00     | 0.00    | 0.00     | 0.00     | 0.00     | 0.00     |
| CE3        | 0.00     | 0.00     | 0.00     | 0.00     | 0.00     | 0.00     | 0.00     | 0.00     | 0.00    | 0.00     | 0.00     | 0.00     | 0.00     |
| PL10       | 0.06     | 0.04     | 0.01     | 0.11     | 0.10     | 0.01     | 0.03     | 0.13     | 0.14    | 0.02     | 0.07     | 0.11     | 0.08     |
| GT48       | 0.00     | 0.00     | 0.00     | 0.00     | 0.00     | 0.00     | 0.00     | 0.00     | 0.00    | 0.00     | 0.00     | 0.00     | 0.00     |
| PL6        | 0.00     | 0.00     | 0.00     | 0.01     | 0.00     | 0.00     | 0.00     | 0.00     | 0.00    | 0.00     | 0.01     | 0.02     | 0.00     |
| GT83       | 0.05     | 0.07     | 0.03     | 0.09     | 0.11     | 0.07     | 0.06     | 0.06     | 0.12    | 0.06     | 0.15     | 0.08     | 0.10     |
| GH126      | 0.00     | 0.00     | 0.00     | 0.00     | 0.00     | 0.00     | 0.00     | 0.00     | 0.00    | 0.00     | 0.00     | 0.00     | 0.00     |
| GH9        | 0.13     | 0.36     | 0.10     | 0.18     | 0.14     | 0.05     | 0.36     | 0.32     | 0.15    | 0.12     | 0.07     | 0.09     | 0.06     |
| GH75       | 0.00     | 0.00     | 0.00     | 0.00     | 0.00     | 0.00     | 0.00     | 0.00     | 0.00    | 0.00     | 0.00     | 0.00     | 0.00     |
| GT71       | 0.00     | 0.00     | 0.00     | 0.00     | 0.00     | 0.00     | 0.00     | 0.00     | 0.00    | 0.00     | 0.00     | 0.00     | 0.00     |
| GH46       | 0.00     | 0.00     | 0.00     | 0.00     | 0.00     | 0.00     | 0.00     | 0.00     | 0.00    | 0.00     | 0.00     | 0.00     | 0.00     |
| GT61       | 0.00     | 0.00     | 0.00     | 0.00     | 0.00     | 0.00     | 0.00     | 0.00     | 0.00    | 0.00     | 0.00     | 0.00     | 0.00     |
| GT3        | 0.07     | 0.11     | 0.10     | 0.19     | 0.16     | 0.17     | 0.17     | 0.11     | 0.22    | 0.09     | 0.12     | 0.14     | 0.12     |
| PL3        | 0.00     | 0.00     | 0.00     | 0.00     | 0.00     | 0.00     | 0.00     | 0.01     | 0.00    | 0.00     | 0.00     | 0.01     | 0.00     |
| GH108      | 0.01     | 0.02     | 0.01     | 0.02     | 0.05     | 0.02     | 0.00     | 0.05     | 0.03    | 0.00     | 0.08     | 0.02     | 0.02     |
| GT56       | 0.00     | 0.00     | 0.00     | 0.00     | 0.00     | 0.00     | 0.00     | 0.00     | 0.00    | 0.00     | 0.00     | 0.00     | 0.00     |
| PL11       | 0.02     | 0.12     | 0.08     | 0.09     | 0.03     | 0.01     | 0.09     | 0.20     | 0.10    | 0.07     | 0.21     | 0.14     | 0.04     |
| GH45       | 0.00     | 0.00     | 0.00     | 0.00     | 0.00     | 0.00     | 0.01     | 0.00     | 0.00    | 0.00     | 0.00     | 0.00     | 0.00     |
| GT34       | 0.00     | 0.00     | 0.00     | 0.00     | 0.00     | 0.00     | 0.01     | 0.00     | 0.00    | 0.00     | 0.00     | 0.00     | 0.00     |
| PL14       | 0.00     | 0.00     | 0.00     | 0.00     | 0.00     | 0.00     | 0.00     | 0.00     | 0.00    | 0.00     | 0.00     | 0.00     | 0.00     |
| GH19       | 0.00     | 0.01     | 0.00     | 0.00     | 0.00     | 0.00     | 0.01     | 0.00     | 0.01    | 0.00     | 0.00     | 0.02     | 0.01     |
| GH118      | 0.00     | 0.00     | 0.00     | 0.00     | 0.00     | 0.00     | 0.00     | 0.00     | 0.00    | 0.00     | 0.00     | 0.00     | 0.00     |
| GH82       | 0.00     | 0.00     | 0.00     | 0.00     | 0.00     | 0.00     | 0.00     | 0.00     | 0.00    | 0.00     | 0.00     | 0.00     | 0.00     |
| GH76       | 0.04     | 0.20     | 0.03     | 0.17     | 0.09     | 0.09     | 0.08     | 0.13     | 0.21    | 0.03     | 0.28     | 0.28     | 0.04     |
| GT4        | 1.13     | 1.88     | 1.25     | 1.56     | 1.39     | 1.77     | 1.65     | 1.70     | 1.83    | 1.59     | 2.36     | 2.03     | 1.12     |
| GT87       | 0.01     | 0.00     | 0.00     | 0.00     | 0.00     | 0.00     | 0.01     | 0.01     | 0.00    | 0.01     | 0.01     | 0.01     | 0.00     |
| GH24       | 0.05     | 0.08     | 0.06     | 0.11     | 0.08     | 0.14     | 0.03     | 0.09     | 0.12    | 0.09     | 0.11     | 0.06     | 0.09     |
| GH90       | 0.00     | 0.00     | 0.00     | 0.00     | 0.00     | 0.00     | 0.00     | 0.00     | 0.00    | 0.00     | 0.00     | 0.00     | 0.00     |
| GH57       | 0.11     | 0.14     | 0.17     | 0.11     | 0.13     | 0.07     | 0.11     | 0.17     | 0.11    | 0.10     | 0.07     | 0.09     | 0.08     |
| GH36       | 0.60     | 0.65     | 0.63     | 0.59     | 0.49     | 0.60     | 0.71     | 0.74     | 0.83    | 0.74     | 0.96     | 1.06     | 0.43     |
| GT46       | 0.00     | 0.00     | 0.00     | 0.00     | 0.00     | 0.00     | 0.00     | 0.00     | 0.00    | 0.00     | 0.00     | 0.00     | 0.00     |
| GH66       | 0.00     | 0.04     | 0.02     | 0.03     | 0.02     | 0.00     | 0.04     | 0.03     | 0.04    | 0.01     | 0.07     | 0.04     | 0.00     |





| CAZY_group | DA-AD-62 | DA-AD-63 | DA-AD-64 | DA-AD-65 | DA-AD-66 | DA-AD-67 | DA-AD-68 | DA-AD-69 | DA-AD-7 | DA-AD-70 | DA-AD-71 | DA-AD-72 | DA-AD-73 |
|------------|----------|----------|----------|----------|----------|----------|----------|----------|---------|----------|----------|----------|----------|
| GT76       | 0.00     | 0.00     | 0.00     | 0.00     | 0.00     | 0.00     | 0.00     | 0.00     | 0.00    | 0.00     | 0.00     | 0.00     | 0.00     |
| GT32       | 0.02     | 0.12     | 0.08     | 0.04     | 0.08     | 0.01     | 0.02     | 0.10     | 0.13    | 0.09     | 0.10     | 0.14     | 0.13     |
| GT47       | 0.02     | 0.06     | 0.03     | 0.02     | 0.01     | 0.01     | 0.04     | 0.02     | 0.03    | 0.07     | 0.07     | 0.02     | 0.01     |
| GH84       | 0.10     | 0.06     | 0.08     | 0.11     | 0.10     | 0.09     | 0.11     | 0.14     | 0.09    | 0.10     | 0.11     | 0.19     | 0.05     |
| GH83       | 0.00     | 0.00     | 0.00     | 0.00     | 0.00     | 0.00     | 0.00     | 0.00     | 0.00    | 0.00     | 0.00     | 0.00     | 0.00     |
| GT59       | 0.00     | 0.00     | 0.00     | 0.00     | 0.00     | 0.00     | 0.00     | 0.00     | 0.00    | 0.00     | 0.00     | 0.00     | 0.00     |
| GH34       | 0.00     | 0.00     | 0.00     | 0.00     | 0.00     | 0.00     | 0.00     | 0.00     | 0.00    | 0.00     | 0.00     | 0.00     | 0.00     |
| GT14       | 0.05     | 0.02     | 0.00     | 0.03     | 0.03     | 0.01     | 0.02     | 0.04     | 0.02    | 0.00     | 0.01     | 0.07     | 0.00     |
| GH47       | 0.00     | 0.00     | 0.00     | 0.00     | 0.00     | 0.00     | 0.00     | 0.00     | 0.00    | 0.00     | 0.00     | 0.00     | 0.00     |
| GH97       | 0.49     | 0.54     | 0.34     | 0.94     | 0.60     | 0.43     | 0.59     | 0.67     | 0.78    | 0.30     | 0.80     | 0.98     | 0.32     |
| GH50       | 0.00     | 0.05     | 0.00     | 0.03     | 0.00     | 0.00     | 0.00     | 0.03     | 0.03    | 0.00     | 0.08     | 0.08     | 0.01     |
| GT26       | 0.13     | 0.19     | 0.16     | 0.10     | 0.16     | 0.17     | 0.16     | 0.15     | 0.16    | 0.18     | 0.21     | 0.22     | 0.09     |
| GH18       | 0.34     | 0.42     | 0.38     | 0.57     | 0.34     | 0.52     | 0.54     | 0.59     | 0.49    | 0.49     | 0.86     | 0.69     | 0.53     |
| GH37       | 0.00     | 0.00     | 0.00     | 0.02     | 0.00     | 0.00     | 0.00     | 0.00     | 0.00    | 0.00     | 0.00     | 0.00     | 0.00     |
| PL13       | 0.02     | 0.02     | 0.00     | 0.03     | 0.03     | 0.02     | 0.01     | 0.03     | 0.03    | 0.00     | 0.07     | 0.05     | 0.02     |
| GH27       | 0.16     | 0.18     | 0.18     | 0.26     | 0.18     | 0.21     | 0.22     | 0.24     | 0.24    | 0.19     | 0.21     | 0.26     | 0.14     |
| GT54       | 0.00     | 0.00     | 0.00     | 0.00     | 0.00     | 0.00     | 0.00     | 0.00     | 0.00    | 0.00     | 0.00     | 0.00     | 0.00     |
| GT91       | 0.00     | 0.00     | 0.00     | 0.00     | 0.00     | 0.00     | 0.00     | 0.00     | 0.00    | 0.00     | 0.00     | 0.00     | 0.00     |
| GT72       | 0.00     | 0.00     | 0.00     | 0.00     | 0.00     | 0.00     | 0.00     | 0.00     | 0.00    | 0.00     | 0.00     | 0.00     | 0.00     |
| GH67       | 0.02     | 0.05     | 0.05     | 0.04     | 0.03     | 0.00     | 0.06     | 0.06     | 0.07    | 0.04     | 0.10     | 0.08     | 0.02     |
| GH12       | 0.00     | 0.00     | 0.00     | 0.00     | 0.00     | 0.00     | 0.00     | 0.00     | 0.00    | 0.00     | 0.00     | 0.00     | 0.00     |
| GH91       | 0.02     | 0.00     | 0.01     | 0.03     | 0.05     | 0.04     | 0.02     | 0.02     | 0.02    | 0.01     | 0.03     | 0.01     | 0.01     |
| GT69       | 0.00     | 0.00     | 0.00     | 0.00     | 0.00     | 0.00     | 0.00     | 0.00     | 0.00    | 0.00     | 0.00     | 0.00     | 0.00     |
| GH106      | 0.17     | 0.25     | 0.08     | 0.21     | 0.13     | 0.04     | 0.09     | 0.26     | 0.14    | 0.08     | 0.30     | 0.26     | 0.04     |
| GT62       | 0.00     | 0.00     | 0.00     | 0.00     | 0.00     | 0.00     | 0.00     | 0.00     | 0.00    | 0.00     | 0.00     | 0.00     | 0.00     |
| GH17       | 0.00     | 0.00     | 0.00     | 0.00     | 0.00     | 0.00     | 0.00     | 0.00     | 0.00    | 0.00     | 0.00     | 0.00     | 0.00     |
| GH88       | 0.18     | 0.19     | 0.08     | 0.35     | 0.31     | 0.12     | 0.19     | 0.28     | 0.31    | 0.21     | 0.32     | 0.47     | 0.21     |
| CE5        | 0.00     | 0.00     | 0.00     | 0.00     | 0.00     | 0.00     | 0.00     | 0.00     | 0.00    | 0.00     | 0.00     | 0.00     | 0.00     |
| GT8        | 0.22     | 0.06     | 0.05     | 0.16     | 0.01     | 0.06     | 0.04     | 0.09     | 0.24    | 0.12     | 0.06     | 0.14     | 0.05     |
| GT50       | 0.00     | 0.00     | 0.00     | 0.00     | 0.00     | 0.00     | 0.00     | 0.00     | 0.00    | 0.00     | 0.00     | 0.00     | 0.00     |
| GT20       | 0.04     | 0.05     | 0.05     | 0.10     | 0.07     | 0.04     | 0.04     | 0.11     | 0.04    | 0.07     | 0.06     | 0.08     | 0.03     |
| PL9        | 0.02     | 0.11     | 0.04     | 0.06     | 0.01     | 0.02     | 0.10     | 0.07     | 0.06    | 0.08     | 0.08     | 0.06     | 0.00     |
| GH55       | 0.01     | 0.02     | 0.02     | 0.01     | 0.05     | 0.04     | 0.01     | 0.02     | 0.02    | 0.01     | 0.06     | 0.02     | 0.03     |
| GH64       | 0.00     | 0.00     | 0.00     | 0.00     | 0.00     | 0.00     | 0.00     | 0.00     | 0.00    | 0.00     | 0.00     | 0.00     | 0.00     |
| GH127      | 0.17     | 0.26     | 0.16     | 0.34     | 0.29     | 0.27     | 0.33     | 0.18     | 0.45    | 0.20     | 0.28     | 0.37     | 0.19     |
| GH103      | 0.01     | 0.00     | 0.00     | 0.00     | 0.00     | 0.00     | 0.00     | 0.00     | 0.00    | 0.01     | 0.01     | 0.01     | 0.00     |
| GH3        | 1.87     | 2.45     | 1.54     | 2.10     | 2.34     | 2.02     | 2.16     | 2.04     | 2.61    | 2.17     | 3.05     | 3.16     | 1.94     |
| GT45       | 0.00     | 0.00     | 0.00     | 0.00     | 0.00     | 0.00     | 0.00     | 0.00     | 0.00    | 0.00     | 0.00     | 0.00     | 0.00     |
| GT74       | 0.00     | 0.00     | 0.00     | 0.00     | 0.00     | 0.00     | 0.00     | 0.00     | 0.00    | 0.00     | 0.00     | 0.00     | 0.00     |
| GT90       | 0.00     | 0.00     | 0.00     | 0.00     | 0.00     | 0.00     | 0.00     | 0.00     | 0.00    | 0.00     | 0.00     | 0.01     | 0.00     |
| GH116      | 0.07     | 0.05     | 0.02     | 0.10     | 0.08     | 0.04     | 0.06     | 0.03     | 0.04    | 0.00     | 0.07     | 0.07     | 0.03     |
| GH31       | 0.89     | 0.78     | 0.73     | 0.80     | 0.77     | 0.79     | 0.99     | 0.96     | 1.04    | 0.92     | 1.16     | 1.10     | 0.75     |
| GT12       | 0.00     | 0.00     | 0.00     | 0.00     | 0.00     | 0.00     | 0.00     | 0.00     | 0.00    | 0.00     | 0.00     | 0.00     | 0.00     |
| CE1        | 0.26     | 0.38     | 0.23     | 0.38     | 0.26     | 0.27     | 0.32     | 0.39     | 0.48    | 0.31     | 0.44     | 0.47     | 0.28     |
| GH121      | 0.00     | 0.00     | 0.00     | 0.06     | 0.00     | 0.01     | 0.00     | 0.00     | 0.00    | 0.00     | 0.00     | 0.00     | 0.00     |
| GH79       | 0.00     | 0.01     | 0.00     | 0.00     | 0.00     | 0.00     | 0.00     | 0.00     | 0.00    | 0.01     | 0.00     | 0.01     | 0.00     |
| GT73       | 0.00     | 0.00     | 0.00     | 0.00     | 0.00     | 0.00     | 0.00     | 0.00     | 0.00    | 0.00     | 0.00     | 0.00     | 0.00     |
| GH77       | 0.60     | 0.65     | 0.55     | 0.47     | 0.52     | 0.63     | 0.55     | 0.53     | 0.55    | 0.55     | 0.65     | 0.72     | 0.45     |
| PL17       | 0.00     | 0.00     | 0.01     | 0.03     | 0.00     | 0.00     | 0.00     | 0.03     | 0.01    | 0.00     | 0.00     | 0.02     | 0.02     |
| PL8        | 0.06     | 0.13     | 0.10     | 0.42     | 0.21     | 0.07     | 0.18     | 0.19     | 0.22    | 0.21     | 0.32     | 0.45     | 0.16     |

| CAZY_group | DA-AD-62 | DA-AD-63 | DA-AD-64 | DA-AD-65 | DA-AD-66 | DA-AD-67 | DA-AD-68 | DA-AD-69 | DA-AD-7 | DA-AD-70 | DA-AD-71 | DA-AD-72 | DA-AD-73 |      |
|------------|----------|----------|----------|----------|----------|----------|----------|----------|---------|----------|----------|----------|----------|------|
| CE9        |          | 0.22     | 0.30     | 0.20     | 0.19     | 0.27     | 0.33     | 0.25     | 0.30    | 0.32     | 0.27     | 0.46     | 0.43     | 0.23 |
| CE15       |          | 0.00     | 0.00     | 0.00     | 0.02     | 0.00     | 0.01     | 0.03     | 0.01    | 0.03     | 0.01     | 0.01     | 0.01     | 0.03 |
| GT79       |          | 0.00     | 0.00     | 0.00     | 0.00     | 0.00     | 0.00     | 0.00     | 0.00    | 0.00     | 0.00     | 0.00     | 0.00     | 0.00 |
| GT10       |          | 0.00     | 0.00     | 0.02     | 0.00     | 0.01     | 0.00     | 0.00     | 0.00    | 0.00     | 0.02     | 0.03     | 0.00     | 0.00 |
| GH119      |          | 0.00     | 0.00     | 0.00     | 0.00     | 0.00     | 0.00     | 0.00     | 0.00    | 0.00     | 0.00     | 0.00     | 0.00     | 0.00 |
| GH16       |          | 0.09     | 0.16     | 0.13     | 0.21     | 0.20     | 0.14     | 0.17     | 0.19    | 0.20     | 0.19     | 0.26     | 0.19     | 0.08 |
| GH43       |          | 1.46     | 1.62     | 1.09     | 2.04     | 1.54     | 0.93     | 1.75     | 2.00    | 2.23     | 1.21     | 2.29     | 2.77     | 0.99 |
| GH51       |          | 0.37     | 0.52     | 0.45     | 0.48     | 0.54     | 0.47     | 0.65     | 0.44    | 0.58     | 0.56     | 0.51     | 0.58     | 0.33 |
| GT35       |          | 0.94     | 0.96     | 0.93     | 0.79     | 0.67     | 0.74     | 0.86     | 0.86    | 0.74     | 0.86     | 0.85     | 0.84     | 0.79 |
| GT25       |          | 0.00     | 0.00     | 0.00     | 0.00     | 0.00     | 0.00     | 0.00     | 0.00    | 0.00     | 0.00     | 0.06     | 0.04     | 0.00 |
| GT2        |          | 3.70     | 4.49     | 3.55     | 3.38     | 3.42     | 4.11     | 3.60     | 3.85    | 4.09     | 3.42     | 5.22     | 4.80     | 3.53 |
| GT51       |          | 0.71     | 0.76     | 0.59     | 0.82     | 0.70     | 0.83     | 0.76     | 0.79    | 0.95     | 0.71     | 0.86     | 1.11     | 0.72 |
| GH107      |          | 0.00     | 0.00     | 0.00     | 0.00     | 0.00     | 0.00     | 0.00     | 0.00    | 0.00     | 0.00     | 0.00     | 0.00     | 0.00 |
| GH7        |          | 0.00     | 0.00     | 0.00     | 0.00     | 0.00     | 0.00     | 0.00     | 0.00    | 0.00     | 0.00     | 0.00     | 0.00     | 0.00 |
| GT7        |          | 0.00     | 0.00     | 0.00     | 0.00     | 0.00     | 0.00     | 0.00     | 0.00    | 0.00     | 0.00     | 0.00     | 0.00     | 0.00 |
| GT36       |          | 0.00     | 0.00     | 0.00     | 0.00     | 0.00     | 0.00     | 0.00     | 0.00    | 0.00     | 0.00     | 0.00     | 0.00     | 0.00 |
| PL7        |          | 0.00     | 0.00     | 0.00     | 0.00     | 0.00     | 0.00     | 0.00     | 0.00    | 0.00     | 0.00     | 0.00     | 0.00     | 0.00 |
| GH110      |          | 0.04     | 0.07     | 0.08     | 0.12     | 0.11     | 0.02     | 0.10     | 0.11    | 0.09     | 0.15     | 0.10     | 0.12     | 0.03 |
| GT21       |          | 0.00     | 0.00     | 0.00     | 0.00     | 0.00     | 0.00     | 0.00     | 0.00    | 0.00     | 0.00     | 0.00     | 0.00     | 0.00 |
| GH62       |          | 0.00     | 0.00     | 0.00     | 0.00     | 0.00     | 0.00     | 0.00     | 0.00    | 0.00     | 0.00     | 0.00     | 0.00     | 0.00 |
| GH125      |          | 0.15     | 0.11     | 0.09     | 0.13     | 0.17     | 0.16     | 0.14     | 0.11    | 0.17     | 0.15     | 0.22     | 0.18     | 0.10 |
| GH117      |          | 0.01     | 0.07     | 0.01     | 0.06     | 0.08     | 0.01     | 0.04     | 0.05    | 0.11     | 0.02     | 0.07     | 0.09     | 0.06 |
| GH68       |          | 0.00     | 0.00     | 0.00     | 0.00     | 0.00     | 0.00     | 0.00     | 0.00    | 0.02     | 0.00     | 0.00     | 0.00     | 0.00 |
| GH85       |          | 0.02     | 0.07     | 0.00     | 0.00     | 0.01     | 0.02     | 0.01     | 0.01    | 0.06     | 0.00     | 0.07     | 0.02     | 0.00 |
| GH92       |          | 0.93     | 1.15     | 0.64     | 1.44     | 1.36     | 0.79     | 1.11     | 1.55    | 1.55     | 0.74     | 2.04     | 1.94     | 0.65 |
| GH40       |          | 0.00     | 0.00     | 0.00     | 0.00     | 0.00     | 0.00     | 0.00     | 0.00    | 0.00     | 0.00     | 0.00     | 0.00     | 0.00 |
| GT49       |          | 0.00     | 0.00     | 0.00     | 0.00     | 0.00     | 0.00     | 0.00     | 0.00    | 0.00     | 0.00     | 0.00     | 0.00     | 0.00 |
| GH112      |          | 0.12     | 0.18     | 0.08     | 0.04     | 0.15     | 0.20     | 0.10     | 0.13    | 0.17     | 0.18     | 0.19     | 0.22     | 0.21 |
| GT67       |          | 0.00     | 0.00     | 0.00     | 0.00     | 0.00     | 0.00     | 0.00     | 0.00    | 0.00     | 0.00     | 0.00     | 0.00     | 0.00 |
| CE8        |          | 0.13     | 0.18     | 0.08     | 0.21     | 0.18     | 0.12     | 0.14     | 0.26    | 0.22     | 0.09     | 0.21     | 0.32     | 0.12 |
| GT86       |          | 0.00     | 0.00     | 0.00     | 0.00     | 0.00     | 0.00     | 0.00     | 0.00    | 0.00     | 0.00     | 0.00     | 0.00     | 0.00 |
| GH101      |          | 0.00     | 0.00     | 0.00     | 0.00     | 0.00     | 0.01     | 0.01     | 0.00    | 0.00     | 0.00     | 0.00     | 0.02     | 0.01 |
| GH81       |          | 0.00     | 0.00     | 0.00     | 0.00     | 0.02     | 0.00     | 0.00     | 0.00    | 0.00     | 0.00     | 0.01     | 0.01     | 0.00 |
| GT93       |          | 0.00     | 0.00     | 0.00     | 0.00     | 0.00     | 0.00     | 0.00     | 0.00    | 0.00     | 0.00     | 0.00     | 0.00     | 0.00 |
| GT63       |          | 0.00     | 0.00     | 0.00     | 0.00     | 0.00     | 0.00     | 0.00     | 0.00    | 0.00     | 0.00     | 0.00     | 0.00     | 0.00 |
| CE11       |          | 0.18     | 0.18     | 0.16     | 0.17     | 0.20     | 0.21     | 0.16     | 0.21    | 0.22     | 0.22     | 0.22     | 0.26     | 0.16 |
| GT19       |          | 0.11     | 0.12     | 0.10     | 0.12     | 0.16     | 0.10     | 0.11     | 0.14    | 0.16     | 0.10     | 0.15     | 0.19     | 0.06 |
| GT33       |          | 0.00     | 0.00     | 0.00     | 0.00     | 0.00     | 0.00     | 0.00     | 0.00    | 0.00     | 0.00     | 0.00     | 0.00     | 0.00 |
| GH21       |          | 0.00     | 0.00     | 0.00     | 0.00     | 0.00     | 0.00     | 0.00     | 0.00    | 0.00     | 0.00     | 0.00     | 0.00     | 0.00 |
| GT68       |          | 0.00     | 0.00     | 0.00     | 0.00     | 0.00     | 0.00     | 0.00     | 0.00    | 0.00     | 0.00     | 0.00     | 0.00     | 0.00 |
| GH89       |          | 0.13     | 0.26     | 0.13     | 0.27     | 0.16     | 0.05     | 0.13     | 0.23    | 0.16     | 0.16     | 0.28     | 0.26     | 0.08 |
| GT82       |          | 0.00     | 0.00     | 0.00     | 0.00     | 0.00     | 0.00     | 0.00     | 0.00    | 0.00     | 0.01     | 0.00     | 0.00     | 0.00 |
| GH30       |          | 0.10     | 0.10     | 0.08     | 0.22     | 0.13     | 0.14     | 0.18     | 0.17    | 0.22     | 0.13     | 0.29     | 0.20     | 0.13 |
| GH20       |          | 0.52     | 1.00     | 0.55     | 1.29     | 0.92     | 0.61     | 0.73     | 0.97    | 1.10     | 0.83     | 1.29     | 1.25     | 0.46 |
| GH52       |          | 0.00     | 0.00     | 0.00     | 0.00     | 0.00     | 0.00     | 0.00     | 0.00    | 0.00     | 0.00     | 0.00     | 0.00     | 0.00 |
| GT84       |          | 0.04     | 0.06     | 0.04     | 0.00     | 0.01     | 0.02     | 0.04     | 0.05    | 0.01     | 0.01     | 0.00     | 0.00     | 0.00 |
| GT15       |          | 0.00     | 0.00     | 0.00     | 0.00     | 0.00     | 0.00     | 0.00     | 0.00    | 0.00     | 0.00     | 0.00     | 0.00     | 0.00 |
| GH93       |          | 0.00     | 0.00     | 0.01     | 0.01     | 0.00     | 0.00     | 0.00     | 0.00    | 0.00     | 0.01     | 0.01     | 0.00     | 0.00 |
| PL16       |          | 0.00     | 0.00     | 0.00     | 0.00     | 0.00     | 0.00     | 0.00     | 0.00    | 0.00     | 0.00     | 0.00     | 0.00     | 0.00 |
| GH26       |          | 0.12     | 0.18     | 0.12     | 0.19     | 0.10     | 0.15     | 0.19     | 0.13    | 0.22     | 0.23     | 0.21     | 0.05     | 0.04 |



| CAZY_group | DA-AD-62 | DA-AD-63 | DA-AD-64 | DA-AD-65 | DA-AD-66 | DA-AD-67 | DA-AD-68 | DA-AD-69 | DA-AD-7 | DA-AD-70 | DA-AD-71 | DA-AD-72 | DA-AD-73 |      |
|------------|----------|----------|----------|----------|----------|----------|----------|----------|---------|----------|----------|----------|----------|------|
| GT52       |          | 0.00     | 0.00     | 0.00     | 0.00     | 0.00     | 0.00     | 0.00     | 0.00    | 0.00     | 0.00     | 0.00     | 0.00     | 0.00 |
| GT64       |          | 0.00     | 0.00     | 0.00     | 0.00     | 0.00     | 0.00     | 0.00     | 0.00    | 0.00     | 0.00     | 0.00     | 0.00     | 0.00 |
| GT85       |          | 0.00     | 0.00     | 0.00     | 0.00     | 0.00     | 0.00     | 0.00     | 0.00    | 0.00     | 0.00     | 0.00     | 0.00     | 0.00 |
| GT16       |          | 0.00     | 0.00     | 0.00     | 0.00     | 0.00     | 0.00     | 0.00     | 0.00    | 0.00     | 0.00     | 0.00     | 0.00     | 0.00 |
| GH56       |          | 0.00     | 0.00     | 0.00     | 0.00     | 0.00     | 0.00     | 0.00     | 0.00    | 0.00     | 0.00     | 0.00     | 0.00     | 0.00 |
| GT60       |          | 0.00     | 0.00     | 0.00     | 0.00     | 0.00     | 0.00     | 0.00     | 0.00    | 0.00     | 0.00     | 0.00     | 0.00     | 0.00 |
| GH41       |          | 0.00     | 0.00     | 0.00     | 0.00     | 0.00     | 0.00     | 0.00     | 0.00    | 0.00     | 0.00     | 0.00     | 0.00     | 0.00 |
| CE7        |          | 0.11     | 0.07     | 0.03     | 0.04     | 0.07     | 0.02     | 0.02     | 0.07    | 0.08     | 0.02     | 0.17     | 0.14     | 0.03 |
| GH39       |          | 0.02     | 0.04     | 0.02     | 0.02     | 0.05     | 0.05     | 0.07     | 0.04    | 0.03     | 0.03     | 0.07     | 0.05     | 0.02 |
| GT30       |          | 0.18     | 0.12     | 0.14     | 0.21     | 0.23     | 0.15     | 0.18     | 0.25    | 0.22     | 0.19     | 0.12     | 0.27     | 0.11 |
| PL15       |          | 0.05     | 0.04     | 0.02     | 0.16     | 0.07     | 0.01     | 0.04     | 0.08    | 0.05     | 0.03     | 0.14     | 0.17     | 0.04 |
| GH102      |          | 0.01     | 0.00     | 0.02     | 0.01     | 0.01     | 0.00     | 0.02     | 0.02    | 0.01     | 0.00     | 0.03     | 0.02     | 0.01 |

| CAZY_group | DA-AD-74 | DA-AD-75 | DA-AD-76 | DA-AD-77 | DA-AD-78 | DA-AD-79 | DA-AD-8 | DA-AD-80 | DA-AD-81 | DA-AD-82 | DA-AD-83 | DA-AD-84 | DA-AD-85 |
|------------|----------|----------|----------|----------|----------|----------|---------|----------|----------|----------|----------|----------|----------|
| GH29       | 0.53     | 0.80     | 0.54     | 0.41     | 0.57     | 0.66     | 1.09    | 0.47     | 0.46     | 0.47     | 1.19     | 0.67     | 0.44     |
| PL4        | 0.00     | 0.00     | 0.00     | 0.00     | 0.00     | 0.00     | 0.00    | 0.00     | 0.00     | 0.00     | 0.00     | 0.00     | 0.00     |
| GH23       | 0.80     | 1.03     | 0.83     | 1.06     | 1.21     | 1.00     | 1.38    | 0.82     | 1.00     | 1.00     | 1.15     | 0.91     | 0.94     |
| CE6        | 0.01     | 0.00     | 0.04     | 0.00     | 0.02     | 0.01     | 0.00    | 0.00     | 0.00     | 0.01     | 0.04     | 0.01     | 0.01     |
| GH72       | 0.11     | 0.10     | 0.20     | 0.10     | 0.18     | 0.06     | 0.13    | 0.08     | 0.17     | 0.10     | 0.16     | 0.11     | 0.11     |
| GH114      | 0.00     | 0.00     | 0.00     | 0.00     | 0.00     | 0.00     | 0.00    | 0.00     | 0.00     | 0.00     | 0.00     | 0.00     | 0.00     |
| GH78       | 0.57     | 0.59     | 0.43     | 0.34     | 0.22     | 0.68     | 0.51    | 0.52     | 0.63     | 0.77     | 1.01     | 1.09     | 0.40     |
| PL19       | 0.00     | 0.00     | 0.00     | 0.00     | 0.00     | 0.00     | 0.00    | 0.00     | 0.00     | 0.00     | 0.00     | 0.00     | 0.00     |
| GT27       | 0.00     | 0.00     | 0.00     | 0.00     | 0.00     | 0.00     | 0.00    | 0.00     | 0.00     | 0.00     | 0.00     | 0.00     | 0.00     |
| GH5        | 0.40     | 0.63     | 0.44     | 0.75     | 0.25     | 0.52     | 0.77    | 0.43     | 0.57     | 0.45     | 0.27     | 0.47     | 0.58     |
| GT40       | 0.00     | 0.00     | 0.00     | 0.00     | 0.00     | 0.00     | 0.00    | 0.00     | 0.00     | 0.00     | 0.00     | 0.00     | 0.00     |
| CE13       | 0.00     | 0.00     | 0.00     | 0.00     | 0.00     | 0.00     | 0.00    | 0.00     | 0.00     | 0.00     | 0.00     | 0.00     | 0.00     |
| GT37       | 0.00     | 0.00     | 0.00     | 0.00     | 0.00     | 0.00     | 0.00    | 0.00     | 0.00     | 0.00     | 0.00     | 0.00     | 0.00     |
| GH33       | 0.19     | 0.14     | 0.15     | 0.03     | 0.11     | 0.21     | 0.16    | 0.12     | 0.11     | 0.18     | 0.29     | 0.18     | 0.12     |
| GT65       | 0.00     | 0.00     | 0.00     | 0.00     | 0.00     | 0.00     | 0.00    | 0.00     | 0.00     | 0.00     | 0.00     | 0.00     | 0.00     |
| GH86       | 0.00     | 0.00     | 0.00     | 0.03     | 0.00     | 0.00     | 0.00    | 0.00     | 0.00     | 0.00     | 0.00     | 0.01     | 0.00     |
| GH123      | 0.06     | 0.08     | 0.08     | 0.00     | 0.03     | 0.05     | 0.10    | 0.08     | 0.06     | 0.14     | 0.14     | 0.14     | 0.05     |
| GH96       | 0.00     | 0.00     | 0.00     | 0.00     | 0.00     | 0.00     | 0.00    | 0.00     | 0.00     | 0.00     | 0.00     | 0.00     | 0.00     |
| GH14       | 0.00     | 0.00     | 0.00     | 0.00     | 0.00     | 0.00     | 0.00    | 0.00     | 0.00     | 0.00     | 0.00     | 0.00     | 0.00     |
| CE3        | 0.00     | 0.00     | 0.00     | 0.00     | 0.00     | 0.00     | 0.00    | 0.00     | 0.00     | 0.00     | 0.00     | 0.00     | 0.00     |
| PL10       | 0.06     | 0.04     | 0.03     | 0.00     | 0.03     | 0.06     | 0.42    | 0.08     | 0.09     | 0.07     | 0.08     | 0.07     | 0.04     |
| GT48       | 0.00     | 0.00     | 0.00     | 0.00     | 0.00     | 0.00     | 0.00    | 0.00     | 0.00     | 0.00     | 0.00     | 0.00     | 0.00     |
| PL6        | 0.00     | 0.00     | 0.00     | 0.00     | 0.00     | 0.00     | 0.00    | 0.00     | 0.00     | 0.00     | 0.02     | 0.02     | 0.00     |
| GT83       | 0.08     | 0.05     | 0.07     | 0.03     | 0.00     | 0.11     | 0.03    | 0.10     | 0.04     | 0.09     | 0.14     | 0.11     | 0.03     |
| GH126      | 0.00     | 0.00     | 0.00     | 0.00     | 0.00     | 0.00     | 0.00    | 0.00     | 0.00     | 0.00     | 0.00     | 0.00     | 0.00     |
| GH9        | 0.14     | 0.31     | 0.11     | 0.75     | 0.06     | 0.17     | 0.23    | 0.08     | 0.14     | 0.23     | 0.16     | 0.18     | 0.26     |
| GH75       | 0.00     | 0.00     | 0.00     | 0.00     | 0.00     | 0.00     | 0.00    | 0.00     | 0.00     | 0.00     | 0.00     | 0.00     | 0.00     |
| GT71       | 0.00     | 0.00     | 0.00     | 0.00     | 0.00     | 0.00     | 0.00    | 0.00     | 0.00     | 0.00     | 0.00     | 0.00     | 0.00     |
| GH46       | 0.00     | 0.00     | 0.00     | 0.00     | 0.00     | 0.00     | 0.00    | 0.00     | 0.00     | 0.00     | 0.00     | 0.00     | 0.00     |
| GT61       | 0.00     | 0.00     | 0.00     | 0.00     | 0.00     | 0.00     | 0.00    | 0.00     | 0.00     | 0.00     | 0.00     | 0.00     | 0.00     |
| GT3        | 0.15     | 0.14     | 0.14     | 0.07     | 0.11     | 0.17     | 0.32    | 0.16     | 0.12     | 0.15     | 0.16     | 0.22     | 0.10     |
| PL3        | 0.00     | 0.00     | 0.00     | 0.00     | 0.00     | 0.00     | 0.00    | 0.00     | 0.00     | 0.00     | 0.00     | 0.00     | 0.00     |
| GH108      | 0.02     | 0.00     | 0.03     | 0.00     | 0.02     | 0.02     | 0.06    | 0.03     | 0.04     | 0.01     | 0.06     | 0.04     | 0.02     |
| GT56       | 0.00     | 0.00     | 0.00     | 0.00     | 0.02     | 0.00     | 0.00    | 0.00     | 0.00     | 0.00     | 0.00     | 0.00     | 0.01     |
| PL11       | 0.11     | 0.04     | 0.09     | 0.03     | 0.05     | 0.10     | 0.16    | 0.10     | 0.09     | 0.14     | 0.04     | 0.10     | 0.11     |
| GH45       | 0.01     | 0.00     | 0.00     | 0.00     | 0.00     | 0.00     | 0.00    | 0.00     | 0.01     | 0.00     | 0.02     | 0.00     | 0.00     |
| GT34       | 0.00     | 0.00     | 0.00     | 0.00     | 0.00     | 0.00     | 0.00    | 0.00     | 0.00     | 0.00     | 0.00     | 0.00     | 0.00     |
| PL14       | 0.00     | 0.00     | 0.00     | 0.00     | 0.00     | 0.00     | 0.00    | 0.00     | 0.00     | 0.00     | 0.00     | 0.00     | 0.00     |
| GH19       | 0.00     | 0.00     | 0.00     | 0.00     | 0.03     | 0.00     | 0.00    | 0.00     | 0.01     | 0.01     | 0.00     | 0.01     | 0.01     |
| GH118      | 0.00     | 0.00     | 0.00     | 0.00     | 0.00     | 0.00     | 0.00    | 0.00     | 0.00     | 0.00     | 0.00     | 0.00     | 0.00     |
| GH82       | 0.00     | 0.00     | 0.00     | 0.00     | 0.00     | 0.00     | 0.00    | 0.00     | 0.00     | 0.00     | 0.00     | 0.00     | 0.00     |
| GH76       | 0.09     | 0.08     | 0.11     | 0.00     | 0.05     | 0.24     | 0.00    | 0.08     | 0.05     | 0.18     | 0.23     | 0.41     | 0.10     |
| GT4        | 1.45     | 1.84     | 1.91     | 1.13     | 1.47     | 2.07     | 1.45    | 1.68     | 1.54     | 1.69     | 2.07     | 2.11     | 1.49     |
| GT87       | 0.01     | 0.01     | 0.00     | 0.00     | 0.02     | 0.00     | 0.00    | 0.01     | 0.01     | 0.00     | 0.02     | 0.01     | 0.00     |
| GH24       | 0.15     | 0.01     | 0.06     | 0.21     | 0.13     | 0.09     | 0.23    | 0.08     | 0.05     | 0.10     | 0.14     | 0.13     | 0.06     |
| GH90       | 0.00     | 0.00     | 0.00     | 0.00     | 0.00     | 0.00     | 0.00    | 0.00     | 0.00     | 0.00     | 0.00     | 0.00     | 0.00     |
| GH57       | 0.12     | 0.20     | 0.16     | 0.14     | 0.18     | 0.15     | 0.19    | 0.08     | 0.20     | 0.07     | 0.12     | 0.12     | 0.08     |
| GH36       | 0.66     | 0.77     | 0.62     | 1.03     | 0.27     | 0.90     | 0.90    | 0.65     | 0.44     | 0.63     | 0.82     | 0.79     | 0.75     |
| GT46       | 0.00     | 0.00     | 0.00     | 0.00     | 0.00     | 0.00     | 0.00    | 0.00     | 0.00     | 0.00     | 0.00     | 0.00     | 0.00     |
| GH66       | 0.01     | 0.03     | 0.02     | 0.03     | 0.02     | 0.02     | 0.03    | 0.02     | 0.04     | 0.02     | 0.06     | 0.10     | 0.03     |



| CAZY_group | DA-AD-74 | DA-AD-75 | DA-AD-76 | DA-AD-77 | DA-AD-78 | DA-AD-79 | DA-AD-8 | DA-AD-80 | DA-AD-81 | DA-AD-82 | DA-AD-83 | DA-AD-84 | DA-AD-85 |
|------------|----------|----------|----------|----------|----------|----------|---------|----------|----------|----------|----------|----------|----------|
| GT76       | 0.00     | 0.00     | 0.00     | 0.00     | 0.00     | 0.00     | 0.00    | 0.00     | 0.00     | 0.00     | 0.00     | 0.00     | 0.00     |
| GT32       | 0.10     | 0.09     | 0.10     | 0.10     | 0.10     | 0.08     | 0.09    | 0.06     | 0.10     | 0.10     | 0.09     | 0.04     | 0.10     |
| GT47       | 0.08     | 0.04     | 0.05     | 0.03     | 0.08     | 0.07     | 0.06    | 0.07     | 0.05     | 0.06     | 0.06     | 0.02     | 0.05     |
| GH84       | 0.08     | 0.13     | 0.14     | 0.07     | 0.13     | 0.11     | 0.10    | 0.05     | 0.07     | 0.12     | 0.16     | 0.13     | 0.03     |
| GH83       | 0.00     | 0.00     | 0.00     | 0.00     | 0.00     | 0.00     | 0.00    | 0.00     | 0.00     | 0.00     | 0.00     | 0.00     | 0.00     |
| GT59       | 0.00     | 0.00     | 0.00     | 0.00     | 0.00     | 0.00     | 0.00    | 0.00     | 0.00     | 0.00     | 0.00     | 0.00     | 0.00     |
| GH34       | 0.00     | 0.00     | 0.00     | 0.00     | 0.00     | 0.00     | 0.00    | 0.00     | 0.00     | 0.00     | 0.00     | 0.00     | 0.00     |
| GT14       | 0.02     | 0.04     | 0.02     | 0.00     | 0.03     | 0.04     | 0.03    | 0.03     | 0.02     | 0.05     | 0.02     | 0.04     | 0.01     |
| GH47       | 0.00     | 0.00     | 0.00     | 0.00     | 0.00     | 0.00     | 0.00    | 0.00     | 0.00     | 0.00     | 0.00     | 0.00     | 0.00     |
| GH97       | 0.46     | 0.92     | 0.52     | 0.27     | 0.57     | 0.86     | 0.80    | 0.63     | 0.76     | 0.55     | 0.86     | 0.97     | 0.47     |
| GH50       | 0.03     | 0.01     | 0.02     | 0.00     | 0.02     | 0.02     | 0.00    | 0.06     | 0.00     | 0.05     | 0.04     | 0.08     | 0.01     |
| GT26       | 0.17     | 0.24     | 0.22     | 0.21     | 0.11     | 0.12     | 0.06    | 0.14     | 0.18     | 0.19     | 0.25     | 0.13     | 0.22     |
| GH18       | 0.40     | 0.43     | 0.49     | 0.24     | 0.40     | 0.64     | 0.51    | 0.55     | 0.53     | 0.71     | 0.72     | 0.68     | 0.41     |
| GH37       | 0.00     | 0.00     | 0.01     | 0.00     | 0.08     | 0.00     | 0.00    | 0.02     | 0.00     | 0.01     | 0.00     | 0.01     | 0.01     |
| PL13       | 0.01     | 0.04     | 0.01     | 0.00     | 0.02     | 0.02     | 0.03    | 0.03     | 0.01     | 0.04     | 0.04     | 0.02     | 0.01     |
| GH27       | 0.18     | 0.26     | 0.16     | 0.10     | 0.11     | 0.32     | 0.26    | 0.22     | 0.27     | 0.18     | 0.31     | 0.24     | 0.24     |
| GT54       | 0.00     | 0.00     | 0.00     | 0.00     | 0.00     | 0.00     | 0.00    | 0.00     | 0.00     | 0.00     | 0.00     | 0.00     | 0.00     |
| GT91       | 0.00     | 0.00     | 0.00     | 0.00     | 0.00     | 0.00     | 0.00    | 0.00     | 0.00     | 0.00     | 0.00     | 0.00     | 0.00     |
| GT72       | 0.00     | 0.00     | 0.00     | 0.00     | 0.00     | 0.00     | 0.00    | 0.00     | 0.00     | 0.00     | 0.00     | 0.00     | 0.00     |
| GH67       | 0.08     | 0.09     | 0.06     | 0.00     | 0.08     | 0.08     | 0.13    | 0.05     | 0.12     | 0.07     | 0.04     | 0.04     | 0.07     |
| GH12       | 0.00     | 0.00     | 0.00     | 0.00     | 0.00     | 0.00     | 0.00    | 0.00     | 0.00     | 0.00     | 0.00     | 0.00     | 0.00     |
| GH91       | 0.02     | 0.01     | 0.00     | 0.00     | 0.00     | 0.06     | 0.00    | 0.03     | 0.00     | 0.02     | 0.00     | 0.06     | 0.03     |
| GT69       | 0.00     | 0.00     | 0.00     | 0.00     | 0.00     | 0.00     | 0.00    | 0.00     | 0.00     | 0.00     | 0.00     | 0.00     | 0.00     |
| GH106      | 0.16     | 0.15     | 0.13     | 0.07     | 0.03     | 0.14     | 0.19    | 0.13     | 0.14     | 0.18     | 0.31     | 0.33     | 0.08     |
| GT62       | 0.00     | 0.00     | 0.00     | 0.00     | 0.00     | 0.00     | 0.00    | 0.00     | 0.00     | 0.00     | 0.00     | 0.00     | 0.00     |
| GH17       | 0.00     | 0.00     | 0.00     | 0.00     | 0.00     | 0.00     | 0.00    | 0.00     | 0.00     | 0.00     | 0.00     | 0.00     | 0.00     |
| GH88       | 0.27     | 0.14     | 0.16     | 0.10     | 0.13     | 0.31     | 0.29    | 0.22     | 0.36     | 0.24     | 0.35     | 0.39     | 0.17     |
| CE5        | 0.00     | 0.00     | 0.00     | 0.00     | 0.00     | 0.00     | 0.00    | 0.00     | 0.00     | 0.00     | 0.00     | 0.00     | 0.00     |
| GT8        | 0.06     | 0.11     | 0.13     | 0.10     | 0.14     | 0.12     | 0.03    | 0.08     | 0.04     | 0.09     | 0.18     | 0.06     | 0.16     |
| GT50       | 0.00     | 0.00     | 0.00     | 0.00     | 0.00     | 0.00     | 0.00    | 0.00     | 0.00     | 0.00     | 0.00     | 0.00     | 0.00     |
| GT20       | 0.09     | 0.05     | 0.04     | 0.00     | 0.10     | 0.09     | 0.00    | 0.06     | 0.05     | 0.07     | 0.08     | 0.11     | 0.03     |
| PL9        | 0.03     | 0.09     | 0.12     | 0.14     | 0.08     | 0.07     | 0.06    | 0.08     | 0.08     | 0.05     | 0.10     | 0.02     | 0.06     |
| GH55       | 0.01     | 0.04     | 0.06     | 0.00     | 0.05     | 0.06     | 0.03    | 0.02     | 0.02     | 0.02     | 0.04     | 0.01     | 0.01     |
| GH64       | 0.00     | 0.00     | 0.00     | 0.00     | 0.00     | 0.00     | 0.00    | 0.00     | 0.00     | 0.00     | 0.00     | 0.00     | 0.00     |
| GH127      | 0.22     | 0.41     | 0.33     | 0.17     | 0.18     | 0.45     | 0.23    | 0.21     | 0.35     | 0.24     | 0.31     | 0.37     | 0.29     |
| GH103      | 0.00     | 0.00     | 0.00     | 0.00     | 0.02     | 0.00     | 0.00    | 0.01     | 0.00     | 0.00     | 0.00     | 0.00     | 0.01     |
| GH3        | 1.87     | 3.00     | 2.12     | 1.47     | 1.27     | 2.98     | 2.96    | 2.21     | 2.32     | 2.31     | 3.22     | 2.85     | 2.49     |
| GT45       | 0.00     | 0.00     | 0.00     | 0.00     | 0.00     | 0.00     | 0.00    | 0.00     | 0.00     | 0.00     | 0.00     | 0.00     | 0.00     |
| GT74       | 0.00     | 0.00     | 0.00     | 0.00     | 0.00     | 0.00     | 0.00    | 0.00     | 0.00     | 0.00     | 0.00     | 0.00     | 0.00     |
| GT90       | 0.00     | 0.00     | 0.00     | 0.00     | 0.00     | 0.00     | 0.00    | 0.00     | 0.00     | 0.00     | 0.00     | 0.00     | 0.00     |
| GH116      | 0.05     | 0.09     | 0.04     | 0.00     | 0.02     | 0.12     | 0.00    | 0.05     | 0.08     | 0.10     | 0.21     | 0.12     | 0.04     |
| GH31       | 0.81     | 1.10     | 1.08     | 0.86     | 0.64     | 1.06     | 1.13    | 0.78     | 0.82     | 1.01     | 1.27     | 1.04     | 0.95     |
| GT12       | 0.00     | 0.00     | 0.00     | 0.00     | 0.00     | 0.00     | 0.00    | 0.00     | 0.00     | 0.00     | 0.00     | 0.00     | 0.00     |
| CE1        | 0.39     | 0.37     | 0.37     | 0.24     | 0.37     | 0.40     | 0.48    | 0.30     | 0.37     | 0.37     | 0.43     | 0.35     | 0.29     |
| GH121      | 0.00     | 0.00     | 0.00     | 0.00     | 0.00     | 0.00     | 0.00    | 0.00     | 0.00     | 0.00     | 0.00     | 0.00     | 0.03     |
| GH79       | 0.01     | 0.00     | 0.00     | 0.00     | 0.00     | 0.02     | 0.03    | 0.02     | 0.01     | 0.01     | 0.00     | 0.01     | 0.01     |
| GT73       | 0.00     | 0.00     | 0.00     | 0.00     | 0.00     | 0.00     | 0.00    | 0.00     | 0.00     | 0.00     | 0.00     | 0.00     | 0.00     |
| GH77       | 0.55     | 0.54     | 0.66     | 0.72     | 0.51     | 0.66     | 0.87    | 0.51     | 0.49     | 0.71     | 0.62     | 0.56     | 0.84     |
| PL17       | 0.01     | 0.04     | 0.00     | 0.00     | 0.00     | 0.00     | 0.00    | 0.02     | 0.00     | 0.00     | 0.00     | 0.01     | 0.00     |
| PL8        | 0.21     | 0.24     | 0.09     | 0.00     | 0.13     | 0.21     | 0.29    | 0.24     | 0.24     | 0.14     | 0.27     | 0.32     | 0.09     |

| CAZY_group | DA-AD-74 | DA-AD-75 | DA-AD-76 | DA-AD-77 | DA-AD-78 | DA-AD-79 | DA-AD-8 | DA-AD-80 | DA-AD-81 | DA-AD-82 | DA-AD-83 | DA-AD-84 | DA-AD-85 |      |
|------------|----------|----------|----------|----------|----------|----------|---------|----------|----------|----------|----------|----------|----------|------|
| CE9        |          | 0.32     | 0.34     | 0.28     | 0.14     | 0.24     | 0.30    | 0.42     | 0.25     | 0.21     | 0.28     | 0.39     | 0.33     | 0.40 |
| CE15       |          | 0.01     | 0.00     | 0.02     | 0.00     | 0.00     | 0.00    | 0.00     | 0.00     | 0.02     | 0.04     | 0.04     | 0.01     | 0.01 |
| GT79       |          | 0.00     | 0.00     | 0.00     | 0.00     | 0.00     | 0.00    | 0.00     | 0.00     | 0.00     | 0.00     | 0.00     | 0.00     | 0.00 |
| GT10       |          | 0.00     | 0.00     | 0.02     | 0.00     | 0.00     | 0.01    | 0.00     | 0.01     | 0.01     | 0.00     | 0.00     | 0.02     | 0.01 |
| GH119      |          | 0.00     | 0.00     | 0.00     | 0.00     | 0.00     | 0.00    | 0.00     | 0.00     | 0.00     | 0.00     | 0.00     | 0.00     | 0.00 |
| GH16       |          | 0.14     | 0.14     | 0.22     | 0.24     | 0.08     | 0.19    | 0.13     | 0.20     | 0.08     | 0.15     | 0.18     | 0.32     | 0.14 |
| GH43       |          | 1.49     | 2.13     | 1.98     | 1.10     | 0.76     | 2.01    | 1.74     | 1.72     | 2.30     | 1.54     | 1.85     | 2.12     | 1.47 |
| GH51       |          | 0.51     | 0.46     | 0.53     | 0.34     | 0.30     | 0.66    | 0.64     | 0.46     | 0.49     | 0.38     | 0.60     | 0.61     | 0.51 |
| GT35       |          | 0.97     | 0.93     | 0.91     | 1.23     | 0.80     | 0.93    | 1.16     | 0.83     | 0.88     | 0.83     | 0.96     | 0.57     | 0.96 |
| GT25       |          | 0.00     | 0.00     | 0.00     | 0.00     | 0.00     | 0.01    | 0.00     | 0.00     | 0.00     | 0.01     | 0.00     | 0.00     | 0.00 |
| GT2        |          | 4.15     | 4.66     | 4.96     | 4.52     | 3.36     | 4.49    | 4.18     | 3.81     | 3.74     | 3.93     | 4.95     | 4.77     | 4.10 |
| GT51       |          | 0.77     | 1.05     | 0.81     | 0.99     | 0.72     | 0.91    | 1.03     | 0.72     | 0.78     | 0.84     | 0.94     | 0.86     | 0.81 |
| GH107      |          | 0.00     | 0.00     | 0.00     | 0.00     | 0.00     | 0.00    | 0.00     | 0.00     | 0.00     | 0.00     | 0.00     | 0.00     | 0.00 |
| GH7        |          | 0.00     | 0.00     | 0.00     | 0.00     | 0.00     | 0.00    | 0.00     | 0.00     | 0.00     | 0.00     | 0.00     | 0.00     | 0.00 |
| GT7        |          | 0.00     | 0.00     | 0.00     | 0.00     | 0.00     | 0.00    | 0.00     | 0.00     | 0.00     | 0.00     | 0.00     | 0.00     | 0.00 |
| GT36       |          | 0.00     | 0.00     | 0.00     | 0.00     | 0.00     | 0.00    | 0.00     | 0.00     | 0.00     | 0.00     | 0.00     | 0.00     | 0.00 |
| PL7        |          | 0.00     | 0.00     | 0.00     | 0.00     | 0.00     | 0.00    | 0.00     | 0.00     | 0.00     | 0.00     | 0.00     | 0.00     | 0.00 |
| GH110      |          | 0.11     | 0.11     | 0.12     | 0.00     | 0.03     | 0.11    | 0.00     | 0.07     | 0.07     | 0.06     | 0.18     | 0.12     | 0.05 |
| GT21       |          | 0.00     | 0.00     | 0.00     | 0.00     | 0.00     | 0.00    | 0.00     | 0.00     | 0.00     | 0.00     | 0.00     | 0.00     | 0.00 |
| GH62       |          | 0.00     | 0.00     | 0.00     | 0.00     | 0.00     | 0.00    | 0.00     | 0.00     | 0.00     | 0.00     | 0.00     | 0.00     | 0.00 |
| GH125      |          | 0.11     | 0.10     | 0.16     | 0.03     | 0.14     | 0.17    | 0.10     | 0.11     | 0.16     | 0.15     | 0.25     | 0.18     | 0.11 |
| GH117      |          | 0.04     | 0.05     | 0.07     | 0.00     | 0.05     | 0.02    | 0.10     | 0.05     | 0.06     | 0.09     | 0.14     | 0.08     | 0.02 |
| GH68       |          | 0.00     | 0.00     | 0.00     | 0.00     | 0.00     | 0.00    | 0.00     | 0.00     | 0.00     | 0.00     | 0.02     | 0.00     | 0.01 |
| GH85       |          | 0.00     | 0.01     | 0.01     | 0.00     | 0.02     | 0.02    | 0.03     | 0.02     | 0.00     | 0.00     | 0.02     | 0.01     | 0.03 |
| GH92       |          | 1.08     | 1.14     | 1.22     | 0.72     | 0.81     | 1.68    | 1.61     | 0.91     | 1.05     | 1.43     | 2.11     | 2.12     | 0.78 |
| GH40       |          | 0.00     | 0.00     | 0.00     | 0.00     | 0.00     | 0.00    | 0.00     | 0.00     | 0.00     | 0.00     | 0.00     | 0.00     | 0.00 |
| GT49       |          | 0.00     | 0.00     | 0.00     | 0.00     | 0.00     | 0.00    | 0.00     | 0.00     | 0.00     | 0.00     | 0.00     | 0.00     | 0.00 |
| GH112      |          | 0.13     | 0.08     | 0.14     | 0.24     | 0.03     | 0.14    | 0.19     | 0.13     | 0.11     | 0.06     | 0.10     | 0.11     | 0.22 |
| GT67       |          | 0.00     | 0.00     | 0.00     | 0.00     | 0.00     | 0.00    | 0.00     | 0.00     | 0.00     | 0.00     | 0.00     | 0.00     | 0.00 |
| CE8        |          | 0.22     | 0.22     | 0.12     | 0.10     | 0.14     | 0.19    | 0.13     | 0.16     | 0.18     | 0.16     | 0.14     | 0.22     | 0.14 |
| GT86       |          | 0.00     | 0.00     | 0.00     | 0.00     | 0.00     | 0.00    | 0.00     | 0.00     | 0.00     | 0.00     | 0.00     | 0.00     | 0.00 |
| GH101      |          | 0.00     | 0.00     | 0.02     | 0.00     | 0.00     | 0.01    | 0.00     | 0.00     | 0.00     | 0.00     | 0.00     | 0.00     | 0.01 |
| GH81       |          | 0.00     | 0.00     | 0.00     | 0.00     | 0.00     | 0.01    | 0.00     | 0.00     | 0.00     | 0.00     | 0.00     | 0.01     | 0.00 |
| GT93       |          | 0.00     | 0.00     | 0.00     | 0.00     | 0.00     | 0.00    | 0.00     | 0.00     | 0.00     | 0.00     | 0.00     | 0.00     | 0.00 |
| GT63       |          | 0.00     | 0.00     | 0.00     | 0.00     | 0.00     | 0.00    | 0.00     | 0.00     | 0.00     | 0.00     | 0.00     | 0.00     | 0.00 |
| CE11       |          | 0.22     | 0.15     | 0.24     | 0.17     | 0.18     | 0.19    | 0.32     | 0.18     | 0.23     | 0.24     | 0.31     | 0.23     | 0.15 |
| GT19       |          | 0.15     | 0.08     | 0.09     | 0.21     | 0.11     | 0.13    | 0.26     | 0.11     | 0.11     | 0.11     | 0.16     | 0.11     | 0.05 |
| GT33       |          | 0.00     | 0.00     | 0.00     | 0.00     | 0.00     | 0.00    | 0.00     | 0.00     | 0.00     | 0.00     | 0.00     | 0.00     | 0.00 |
| GH21       |          | 0.00     | 0.00     | 0.00     | 0.00     | 0.00     | 0.00    | 0.00     | 0.00     | 0.00     | 0.00     | 0.00     | 0.00     | 0.00 |
| GT68       |          | 0.00     | 0.00     | 0.00     | 0.00     | 0.00     | 0.00    | 0.00     | 0.00     | 0.00     | 0.00     | 0.00     | 0.00     | 0.00 |
| GH89       |          | 0.15     | 0.10     | 0.09     | 0.14     | 0.16     | 0.27    | 0.10     | 0.17     | 0.08     | 0.23     | 0.37     | 0.24     | 0.06 |
| GT82       |          | 0.00     | 0.00     | 0.00     | 0.00     | 0.00     | 0.00    | 0.00     | 0.00     | 0.00     | 0.00     | 0.00     | 0.00     | 0.00 |
| GH30       |          | 0.11     | 0.23     | 0.16     | 0.17     | 0.08     | 0.21    | 0.03     | 0.13     | 0.27     | 0.20     | 0.31     | 0.23     | 0.16 |
| GH20       |          | 0.90     | 0.71     | 0.69     | 0.44     | 0.43     | 0.97    | 1.16     | 0.77     | 0.62     | 0.97     | 1.62     | 1.35     | 0.56 |
| GH52       |          | 0.00     | 0.00     | 0.00     | 0.00     | 0.00     | 0.00    | 0.00     | 0.00     | 0.00     | 0.00     | 0.00     | 0.00     | 0.00 |
| GT84       |          | 0.05     | 0.06     | 0.01     | 0.00     | 0.06     | 0.06    | 0.00     | 0.03     | 0.04     | 0.01     | 0.00     | 0.00     | 0.02 |
| GT15       |          | 0.00     | 0.00     | 0.00     | 0.00     | 0.00     | 0.00    | 0.00     | 0.00     | 0.00     | 0.00     | 0.00     | 0.00     | 0.00 |
| GH93       |          | 0.00     | 0.00     | 0.00     | 0.00     | 0.00     | 0.00    | 0.00     | 0.00     | 0.00     | 0.01     | 0.00     | 0.00     | 0.00 |
| PL16       |          | 0.00     | 0.00     | 0.00     | 0.00     | 0.00     | 0.00    | 0.00     | 0.00     | 0.00     | 0.00     | 0.00     | 0.00     | 0.01 |
| GH26       |          | 0.14     | 0.26     | 0.16     | 0.27     | 0.05     | 0.25    | 0.23     | 0.21     | 0.16     | 0.08     | 0.08     | 0.12     | 0.15 |





| CAZY_group | DA-AD-74 | DA-AD-75 | DA-AD-76 | DA-AD-77 | DA-AD-78 | DA-AD-79 | DA-AD-8 | DA-AD-80 | DA-AD-81 | DA-AD-82 | DA-AD-83 | DA-AD-84 | DA-AD-85 |
|------------|----------|----------|----------|----------|----------|----------|---------|----------|----------|----------|----------|----------|----------|
| GT52       |          | 0.00     | 0.00     | 0.00     | 0.00     | 0.00     | 0.00    | 0.00     | 0.00     | 0.00     | 0.00     | 0.00     | 0.00     |
| GT64       |          | 0.00     | 0.00     | 0.00     | 0.00     | 0.00     | 0.00    | 0.00     | 0.00     | 0.00     | 0.00     | 0.00     | 0.00     |
| GT85       |          | 0.00     | 0.00     | 0.00     | 0.00     | 0.00     | 0.00    | 0.00     | 0.00     | 0.00     | 0.00     | 0.00     | 0.00     |
| GT16       |          | 0.00     | 0.00     | 0.00     | 0.00     | 0.00     | 0.00    | 0.00     | 0.00     | 0.00     | 0.00     | 0.00     | 0.00     |
| GH56       |          | 0.00     | 0.00     | 0.00     | 0.00     | 0.00     | 0.00    | 0.00     | 0.00     | 0.00     | 0.00     | 0.00     | 0.00     |
| GT60       |          | 0.00     | 0.00     | 0.00     | 0.00     | 0.00     | 0.00    | 0.00     | 0.00     | 0.00     | 0.00     | 0.00     | 0.00     |
| GH41       |          | 0.00     | 0.00     | 0.00     | 0.00     | 0.00     | 0.00    | 0.00     | 0.00     | 0.00     | 0.00     | 0.00     | 0.00     |
| CE7        |          | 0.04     | 0.05     | 0.08     | 0.00     | 0.06     | 0.04    | 0.03     | 0.05     | 0.09     | 0.08     | 0.21     | 0.16     |
| GH39       |          | 0.04     | 0.10     | 0.04     | 0.17     | 0.02     | 0.05    | 0.13     | 0.04     | 0.04     | 0.04     | 0.04     | 0.04     |
| GT30       |          | 0.23     | 0.18     | 0.20     | 0.17     | 0.19     | 0.19    | 0.26     | 0.23     | 0.17     | 0.24     | 0.29     | 0.26     |
| PL15       |          | 0.04     | 0.10     | 0.03     | 0.00     | 0.03     | 0.09    | 0.03     | 0.11     | 0.04     | 0.09     | 0.14     | 0.13     |
| GH102      |          | 0.02     | 0.01     | 0.02     | 0.00     | 0.06     | 0.03    | 0.00     | 0.01     | 0.02     | 0.04     | 0.02     | 0.00     |

| CAZY_group | DA-AD-9 | IN-CH-12 |
|------------|---------|----------|
| GH29       | 1.15    | 0.65     |
| PL4        | 0.00    | 0.00     |
| GH23       | 1.10    | 0.72     |
| CE6        | 0.00    | 0.26     |
| GH72       | 0.16    | 0.21     |
| GH114      | 0.00    | 0.00     |
| GH78       | 0.31    | 0.19     |
| PL19       | 0.00    | 0.00     |
| GT27       | 0.00    | 0.00     |
| GH5        | 0.94    | 0.77     |
| GT40       | 0.00    | 0.00     |
| CE13       | 0.00    | 0.00     |
| GT37       | 0.00    | 0.00     |
| GH33       | 0.10    | 0.00     |
| GT65       | 0.00    | 0.00     |
| GH86       | 0.00    | 0.00     |
| GH123      | 0.05    | 0.05     |
| GH96       | 0.00    | 0.00     |
| GH14       | 0.00    | 0.00     |
| CE3        | 0.00    | 0.00     |
| PL10       | 0.21    | 0.21     |
| GT48       | 0.00    | 0.00     |
| PL6        | 0.00    | 0.00     |
| GT83       | 0.05    | 0.05     |
| GH126      | 0.00    | 0.00     |
| GH9        | 0.21    | 0.04     |
| GH75       | 0.00    | 0.00     |
| GT71       | 0.00    | 0.00     |
| GH46       | 0.00    | 0.00     |
| GT61       | 0.00    | 0.00     |
| GT3        | 0.26    | 0.32     |
| PL3        | 0.00    | 0.00     |
| GH108      | 0.05    | 0.02     |
| GT56       | 0.00    | 0.02     |
| PL11       | 0.00    | 0.04     |
| GH45       | 0.00    | 0.00     |
| GT34       | 0.00    | 0.00     |
| PL14       | 0.00    | 0.00     |
| GH19       | 0.00    | 0.02     |
| GH118      | 0.00    | 0.00     |
| GH82       | 0.00    | 0.00     |
| GH76       | 0.00    | 0.00     |
| GT4        | 1.52    | 1.34     |
| GT87       | 0.00    | 0.00     |
| GH24       | 0.05    | 0.39     |
| GH90       | 0.00    | 0.00     |
| GH57       | 0.00    | 0.12     |
| GH36       | 1.10    | 1.04     |
| GT46       | 0.00    | 0.00     |
| GH66       | 0.00    | 0.02     |

| CAZY_group | DA-AD-9 | IN-CH-12 |
|------------|---------|----------|
| GH48       | 0.00    | 0.00     |
| GT53       | 0.00    | 0.00     |
| GH60       | 0.00    | 0.00     |
| GT31       | 0.00    | 0.00     |
| GH105      | 0.10    | 0.28     |
| GT23       | 0.00    | 0.00     |
| GH11       | 0.00    | 0.00     |
| GT38       | 0.00    | 0.00     |
| GT43       | 0.00    | 0.00     |
| GH99       | 0.00    | 0.00     |
| GH38       | 0.16    | 0.02     |
| GH109      | 0.16    | 0.25     |
| GH2        | 3.77    | 2.90     |
| GT28       | 0.52    | 0.39     |
| GH42       | 0.42    | 0.05     |
| GT58       | 0.00    | 0.00     |
| GH61       | 0.00    | 0.00     |
| GH80       | 0.00    | 0.00     |
| GH98       | 0.00    | 0.00     |
| GH6        | 0.00    | 0.00     |
| GT1        | 0.10    | 0.00     |
| GH28       | 0.79    | 0.88     |
| GT42       | 0.00    | 0.00     |
| GH128      | 0.00    | 0.00     |
| CE12       | 0.10    | 0.33     |
| CE16       | 0.00    | 0.00     |
| GT89       | 0.00    | 0.00     |
| GT11       | 0.00    | 0.05     |
| GT77       | 0.00    | 0.07     |
| GT55       | 0.00    | 0.00     |
| GT18       | 0.00    | 0.00     |
| GH87       | 0.00    | 0.00     |
| PL5        | 0.00    | 0.00     |
| GH22       | 0.00    | 0.00     |
| CE2        | 0.05    | 0.05     |
| GH120      | 0.05    | 0.00     |
| GH73       | 0.73    | 0.65     |
| GT17       | 0.00    | 0.00     |
| GH124      | 0.00    | 0.00     |
| GH54       | 0.00    | 0.00     |
| GH100      | 0.00    | 0.00     |
| GH113      | 0.05    | 0.00     |
| GT5        | 0.84    | 0.30     |
| GH94       | 0.73    | 0.35     |
| GT66       | 0.00    | 0.00     |
| GT94       | 0.00    | 0.00     |
| GH58       | 0.00    | 0.00     |
| GH1        | 0.16    | 0.07     |
| PL22       | 0.00    | 0.00     |

| CAZY_group | DA-AD-9 | IN-CH-12 |
|------------|---------|----------|
| GT76       | 0.00    | 0.00     |
| GT32       | 0.16    | 0.09     |
| GT47       | 0.00    | 0.00     |
| GH84       | 0.10    | 0.30     |
| GH83       | 0.00    | 0.00     |
| GT59       | 0.00    | 0.00     |
| GH34       | 0.00    | 0.00     |
| GT14       | 0.00    | 0.02     |
| GH47       | 0.00    | 0.00     |
| GH97       | 0.73    | 1.26     |
| GH50       | 0.00    | 0.00     |
| GT26       | 0.16    | 0.28     |
| GH18       | 0.37    | 0.11     |
| GH37       | 0.00    | 0.02     |
| PL13       | 0.00    | 0.00     |
| GH27       | 0.16    | 0.18     |
| GT54       | 0.00    | 0.00     |
| GT91       | 0.00    | 0.00     |
| GT72       | 0.00    | 0.00     |
| GH67       | 0.00    | 0.21     |
| GH12       | 0.00    | 0.00     |
| GH91       | 0.00    | 0.00     |
| GT69       | 0.00    | 0.00     |
| GH106      | 0.21    | 0.21     |
| GT62       | 0.00    | 0.00     |
| GH17       | 0.00    | 0.00     |
| GH88       | 0.00    | 0.12     |
| CE5        | 0.00    | 0.00     |
| GT8        | 0.05    | 0.07     |
| GT50       | 0.00    | 0.00     |
| GT20       | 0.00    | 0.00     |
| PL9        | 0.00    | 0.00     |
| GH55       | 0.00    | 0.00     |
| GH64       | 0.00    | 0.00     |
| GH127      | 0.31    | 0.37     |
| GH103      | 0.00    | 0.00     |
| GH3        | 2.25    | 2.76     |
| GT45       | 0.00    | 0.00     |
| GT74       | 0.00    | 0.00     |
| GT90       | 0.00    | 0.00     |
| GH116      | 0.05    | 0.00     |
| GH31       | 1.05    | 0.98     |
| GT12       | 0.00    | 0.00     |
| CE1        | 0.26    | 0.30     |
| GH121      | 0.00    | 0.00     |
| GH79       | 0.00    | 0.00     |
| GT73       | 0.00    | 0.00     |
| GH77       | 0.63    | 0.49     |
| PL17       | 0.00    | 0.00     |
| PL8        | 0.00    | 0.05     |

| CAZY_group | DA-AD-9 | IN-CH-12 |
|------------|---------|----------|
| CE9        | 0.42    | 0.19     |
| CE15       | 0.00    | 0.00     |
| GT79       | 0.00    | 0.00     |
| GT10       | 0.00    | 0.00     |
| GH119      | 0.00    | 0.00     |
| GH16       | 0.26    | 0.25     |
| GH43       | 1.78    | 2.55     |
| GH51       | 0.63    | 1.21     |
| GT35       | 0.94    | 0.58     |
| GT25       | 0.00    | 0.00     |
| GT2        | 3.93    | 4.97     |
| GT51       | 1.26    | 1.30     |
| GH107      | 0.00    | 0.00     |
| GH7        | 0.00    | 0.00     |
| GT7        | 0.00    | 0.00     |
| GT36       | 0.00    | 0.00     |
| PL7        | 0.00    | 0.00     |
| GH110      | 0.10    | 0.11     |
| GT21       | 0.00    | 0.00     |
| GH62       | 0.00    | 0.00     |
| GH125      | 0.10    | 0.21     |
| GH117      | 0.05    | 0.00     |
| GH68       | 0.00    | 0.00     |
| GH85       | 0.10    | 0.16     |
| GH92       | 0.79    | 1.02     |
| GH40       | 0.00    | 0.00     |
| GT49       | 0.00    | 0.00     |
| GH112      | 0.16    | 0.02     |
| GT67       | 0.00    | 0.00     |
| CE8        | 0.16    | 0.35     |
| GT86       | 0.00    | 0.00     |
| GH101      | 0.00    | 0.00     |
| GH81       | 0.00    | 0.00     |
| GT93       | 0.00    | 0.00     |
| GT63       | 0.00    | 0.00     |
| CE11       | 0.42    | 0.40     |
| GT19       | 0.26    | 0.26     |
| GT33       | 0.00    | 0.00     |
| GH21       | 0.00    | 0.00     |
| GT68       | 0.00    | 0.00     |
| GH89       | 0.26    | 0.14     |
| GT82       | 0.00    | 0.00     |
| GH30       | 0.05    | 0.19     |
| GH20       | 1.15    | 1.05     |
| GH52       | 0.00    | 0.00     |
| GT84       | 0.00    | 0.00     |
| GT15       | 0.00    | 0.00     |
| GH93       | 0.00    | 0.00     |
| PL16       | 0.00    | 0.00     |
| GH26       | 0.21    | 0.00     |

| CAZY_group | DA-AD-9 | IN-CH-12 |
|------------|---------|----------|
| GT75       | 0.00    | 0.00     |
| GH53       | 0.73    | 0.14     |
| GT88       | 0.00    | 0.00     |
| GT24       | 0.00    | 0.00     |
| GT81       | 0.00    | 0.00     |
| GH4        | 0.00    | 0.05     |
| GT78       | 0.00    | 0.00     |
| GH8        | 0.05    | 0.12     |
| GH70       | 0.00    | 0.02     |
| GH122      | 0.00    | 0.00     |
| GH74       | 0.00    | 0.00     |
| GT41       | 0.00    | 0.00     |
| PL1        | 0.21    | 0.12     |
| GH15       | 0.00    | 0.00     |
| GH32       | 0.94    | 0.69     |
| GH44       | 0.00    | 0.00     |
| GT6        | 0.00    | 0.00     |
| GH13       | 4.61    | 3.39     |
| GT80       | 0.00    | 0.00     |
| GH71       | 0.00    | 0.00     |
| GH63       | 0.05    | 0.05     |
| PL21       | 0.00    | 0.00     |
| GH65       | 0.10    | 0.02     |
| CE4        | 0.73    | 0.35     |
| CE14       | 0.05    | 0.00     |
| GH115      | 0.10    | 0.26     |
| GH104      | 0.00    | 0.02     |
| GH111      | 0.00    | 0.00     |
| GH95       | 0.89    | 0.72     |
| GT70       | 0.00    | 0.00     |
| CE10       | 0.05    | 0.09     |
| GH10       | 0.10    | 0.19     |
| GH130      | 0.21    | 0.30     |
| PL20       | 0.00    | 0.00     |
| GH69       | 0.00    | 0.00     |
| PL2        | 0.00    | 0.00     |
| GH49       | 0.00    | 0.00     |
| GH25       | 0.58    | 0.86     |
| GH59       | 0.00    | 0.00     |
| GH35       | 0.16    | 0.35     |
| GT39       | 0.00    | 0.00     |
| GT57       | 0.00    | 0.00     |
| GH129      | 0.00    | 0.00     |
| GT22       | 0.00    | 0.00     |
| PL12       | 0.00    | 0.02     |
| PL18       | 0.00    | 0.00     |
| GT92       | 0.00    | 0.00     |
| GT44       | 0.00    | 0.00     |
| GT29       | 0.00    | 0.00     |
| GT13       | 0.00    | 0.00     |

| CAZY_group | DA-AD-9 | IN-CH-12 |
|------------|---------|----------|
| GT52       | 0.00    | 0.00     |
| GT64       | 0.00    | 0.00     |
| GT85       | 0.00    | 0.00     |
| GT16       | 0.00    | 0.00     |
| GH56       | 0.00    | 0.00     |
| GT60       | 0.00    | 0.00     |
| GH41       | 0.00    | 0.00     |
| CE7        | 0.21    | 0.16     |
| GH39       | 0.16    | 0.02     |
| GT30       | 0.37    | 0.28     |
| PL15       | 0.00    | 0.05     |
| GH102      | 0.00    | 0.04     |



## Normalized\_abundance\_2

| CAZY_group | CN-AD-67 | CN-AD-68 | CN-AD-69 | CN-AD-70 | ES-AD-1 | ES-AD-10 | ES-AD-11 | ES-AD-12 | ES-AD-13 | ES-AD-14 | ES-AD-15 | ES-AD-16 | ES-AD-17 | ES-AD-18 | ES-AD-19 | ES-AD-2 |
|------------|----------|----------|----------|----------|---------|----------|----------|----------|----------|----------|----------|----------|----------|----------|----------|---------|
| GH29       | 0.48     | 0.64     | 0.37     | 0.62     | 1.04    | 1.16     | 0.08     | 0.86     | 0.58     | 0.45     | 0.65     | 0.76     | 0.62     | 0.86     | 0.47     | 0.92    |
| PL4        | 0.00     | 0.00     | 0.00     | 0.00     | 0.00    | 0.00     | 0.00     | 0.00     | 0.00     | 0.00     | 0.00     | 0.00     | 0.00     | 0.00     | 0.00     | 0.00    |
| GH23       | 0.69     | 1.24     | 1.08     | 0.90     | 1.50    | 1.34     | 0.29     | 1.08     | 1.09     | 1.03     | 1.29     | 1.05     | 1.48     | 0.88     | 0.87     | 1.59    |
| CE6        | 0.03     | 0.02     | 0.02     | 0.07     | 0.05    | 0.03     | 0.01     | 0.01     | 0.01     | 0.01     | 0.02     | 0.02     | 0.03     | 0.02     | 0.00     | 0.03    |
| GH72       | 0.03     | 0.09     | 0.04     | 0.08     | 0.17    | 0.15     | 0.01     | 0.08     | 0.06     | 0.12     | 0.04     | 0.14     | 0.15     | 0.09     | 0.07     | 0.19    |
| GH114      | 0.00     | 0.00     | 0.00     | 0.00     | 0.00    | 0.00     | 0.00     | 0.00     | 0.00     | 0.00     | 0.00     | 0.00     | 0.00     | 0.00     | 0.00     | 0.00    |
| GH78       | 0.42     | 0.53     | 0.90     | 1.08     | 1.35    | 0.96     | 0.06     | 0.81     | 0.38     | 0.67     | 0.91     | 0.98     | 0.82     | 0.24     | 0.66     | 0.72    |
| PL19       | 0.00     | 0.00     | 0.00     | 0.00     | 0.00    | 0.00     | 0.00     | 0.00     | 0.00     | 0.00     | 0.00     | 0.00     | 0.00     | 0.00     | 0.00     | 0.00    |
| GT27       | 0.00     | 0.00     | 0.00     | 0.00     | 0.00    | 0.00     | 0.00     | 0.00     | 0.00     | 0.00     | 0.00     | 0.00     | 0.00     | 0.00     | 0.00     | 0.00    |
| GH5        | 0.24     | 0.46     | 0.19     | 0.38     | 0.20    | 0.30     | 0.07     | 0.36     | 0.47     | 0.38     | 0.84     | 0.44     | 0.34     | 0.57     | 0.22     | 0.45    |
| GT40       | 0.00     | 0.00     | 0.00     | 0.00     | 0.00    | 0.00     | 0.00     | 0.00     | 0.00     | 0.00     | 0.00     | 0.00     | 0.00     | 0.00     | 0.00     | 0.00    |
| CE13       | 0.00     | 0.00     | 0.00     | 0.00     | 0.00    | 0.00     | 0.00     | 0.00     | 0.00     | 0.00     | 0.00     | 0.00     | 0.00     | 0.00     | 0.00     | 0.00    |
| GT37       | 0.00     | 0.00     | 0.00     | 0.00     | 0.00    | 0.00     | 0.00     | 0.00     | 0.00     | 0.00     | 0.00     | 0.00     | 0.00     | 0.00     | 0.00     | 0.00    |
| GH33       | 0.18     | 0.25     | 0.16     | 0.34     | 0.39    | 0.35     | 0.04     | 0.14     | 0.21     | 0.19     | 0.28     | 0.27     | 0.23     | 0.16     | 0.16     | 0.22    |
| GT65       | 0.00     | 0.00     | 0.00     | 0.00     | 0.00    | 0.00     | 0.00     | 0.00     | 0.00     | 0.00     | 0.00     | 0.00     | 0.00     | 0.00     | 0.00     | 0.00    |
| GH86       | 0.00     | 0.00     | 0.02     | 0.00     | 0.00    | 0.00     | 0.00     | 0.01     | 0.00     | 0.00     | 0.00     | 0.00     | 0.02     | 0.00     | 0.00     | 0.00    |
| GH123      | 0.00     | 0.07     | 0.18     | 0.11     | 0.17    | 0.13     | 0.03     | 0.13     | 0.04     | 0.09     | 0.11     | 0.17     | 0.14     | 0.12     | 0.06     | 0.07    |
| GH96       | 0.00     | 0.00     | 0.00     | 0.00     | 0.00    | 0.00     | 0.00     | 0.00     | 0.00     | 0.00     | 0.00     | 0.00     | 0.00     | 0.00     | 0.00     | 0.00    |
| GH14       | 0.00     | 0.00     | 0.00     | 0.00     | 0.00    | 0.00     | 0.00     | 0.00     | 0.00     | 0.00     | 0.00     | 0.00     | 0.00     | 0.00     | 0.00     | 0.00    |
| CE3        | 0.00     | 0.00     | 0.00     | 0.00     | 0.00    | 0.00     | 0.00     | 0.00     | 0.00     | 0.00     | 0.00     | 0.00     | 0.00     | 0.00     | 0.00     | 0.00    |
| PL10       | 0.12     | 0.16     | 0.11     | 0.14     | 0.06    | 0.20     | 0.01     | 0.17     | 0.17     | 0.05     | 0.11     | 0.05     | 0.12     | 0.04     | 0.12     | 0.14    |
| GT48       | 0.00     | 0.00     | 0.00     | 0.00     | 0.00    | 0.00     | 0.00     | 0.00     | 0.00     | 0.00     | 0.00     | 0.00     | 0.00     | 0.00     | 0.00     | 0.00    |
| PL6        | 0.00     | 0.00     | 0.00     | 0.01     | 0.00    | 0.00     | 0.00     | 0.00     | 0.00     | 0.00     | 0.00     | 0.01     | 0.00     | 0.00     | 0.00     | 0.00    |
| GT83       | 0.03     | 0.05     | 0.07     | 0.07     | 0.21    | 0.20     | 0.03     | 0.02     | 0.06     | 0.05     | 0.11     | 0.10     | 0.03     | 0.09     | 0.09     | 0.08    |
| GH126      | 0.00     | 0.00     | 0.00     | 0.00     | 0.00    | 0.00     | 0.00     | 0.00     | 0.00     | 0.00     | 0.00     | 0.00     | 0.00     | 0.00     | 0.00     | 0.00    |
| GH9        | 0.12     | 0.14     | 0.18     | 0.12     | 0.12    | 0.28     | 0.01     | 0.08     | 0.04     | 0.11     | 0.30     | 0.04     | 0.26     | 0.32     | 0.07     | 0.24    |
| GH75       | 0.00     | 0.00     | 0.00     | 0.00     | 0.00    | 0.00     | 0.00     | 0.00     | 0.00     | 0.00     | 0.00     | 0.00     | 0.00     | 0.00     | 0.00     | 0.00    |
| GT71       | 0.00     | 0.00     | 0.00     | 0.00     | 0.00    | 0.00     | 0.00     | 0.00     | 0.00     | 0.00     | 0.00     | 0.00     | 0.00     | 0.00     | 0.00     | 0.00    |
| GH46       | 0.00     | 0.00     | 0.00     | 0.00     | 0.00    | 0.00     | 0.00     | 0.00     | 0.00     | 0.00     | 0.00     | 0.00     | 0.02     | 0.00     | 0.00     | 0.00    |
| GT61       | 0.00     | 0.00     | 0.00     | 0.00     | 0.00    | 0.00     | 0.00     | 0.00     | 0.00     | 0.00     | 0.00     | 0.00     | 0.00     | 0.00     | 0.00     | 0.00    |
| GT3        | 0.15     | 0.07     | 0.12     | 0.07     | 0.24    | 0.20     | 0.00     | 0.17     | 0.17     | 0.07     | 0.09     | 0.20     | 0.20     | 0.27     | 0.14     | 0.26    |
| PL3        | 0.00     | 0.00     | 0.00     | 0.00     | 0.00    | 0.00     | 0.00     | 0.00     | 0.00     | 0.00     | 0.00     | 0.00     | 0.00     | 0.00     | 0.00     | 0.00    |
| GH108      | 0.03     | 0.07     | 0.07     | 0.01     | 0.02    | 0.05     | 0.00     | 0.04     | 0.01     | 0.00     | 0.02     | 0.03     | 0.03     | 0.01     | 0.07     | 0.01    |
| GT56       | 0.00     | 0.00     | 0.00     | 0.00     | 0.00    | 0.00     | 0.00     | 0.00     | 0.00     | 0.00     | 0.00     | 0.00     | 0.02     | 0.00     | 0.00     | 0.00    |
| PL11       | 0.15     | 0.07     | 0.07     | 0.22     | 0.21    | 0.15     | 0.03     | 0.07     | 0.08     | 0.10     | 0.22     | 0.09     | 0.17     | 0.05     | 0.09     | 0.15    |
| GH45       | 0.03     | 0.00     | 0.02     | 0.00     | 0.00    | 0.03     | 0.00     | 0.01     | 0.00     | 0.01     | 0.00     | 0.00     | 0.02     | 0.00     | 0.00     | 0.00    |
| GT34       | 0.00     | 0.00     | 0.00     | 0.00     | 0.00    | 0.00     | 0.00     | 0.00     | 0.00     | 0.00     | 0.00     | 0.00     | 0.00     | 0.00     | 0.01     | 0.00    |
| PL14       | 0.00     | 0.00     | 0.00     | 0.00     | 0.00    | 0.00     | 0.00     | 0.00     | 0.00     | 0.00     | 0.00     | 0.00     | 0.00     | 0.00     | 0.00     | 0.00    |
| GH19       | 0.00     | 0.00     | 0.04     | 0.01     | 0.02    | 0.00     | 0.00     | 0.03     | 0.00     | 0.00     | 0.00     | 0.01     | 0.00     | 0.03     | 0.00     | 0.03    |
| GH118      | 0.00     | 0.00     | 0.00     | 0.00     | 0.00    | 0.00     | 0.00     | 0.00     | 0.00     | 0.00     | 0.00     | 0.00     | 0.00     | 0.00     | 0.00     | 0.00    |
| GH82       | 0.00     | 0.00     | 0.00     | 0.00     | 0.00    | 0.00     | 0.00     | 0.00     | 0.00     | 0.00     | 0.00     | 0.00     | 0.00     | 0.00     | 0.00     | 0.00    |
| GH76       | 0.09     | 0.16     | 0.18     | 0.22     | 0.20    | 0.38     | 0.03     | 0.16     | 0.03     | 0.11     | 0.24     | 0.24     | 0.26     | 0.04     | 0.14     | 0.04    |
| GT4        | 1.09     | 1.91     | 2.05     | 1.52     | 2.45    | 2.51     | 0.18     | 1.45     | 1.56     | 1.66     | 1.75     | 2.10     | 1.91     | 1.26     | 1.95     | 2.13    |
| GT87       | 0.00     | 0.00     | 0.00     | 0.00     | 0.00    | 0.03     | 0.00     | 0.01     | 0.00     | 0.00     | 0.02     | 0.00     | 0.00     | 0.01     | 0.00     | 0.00    |
| GH24       | 0.36     | 0.14     | 0.16     | 0.18     | 0.21    | 0.25     | 0.01     | 0.14     | 0.10     | 0.07     | 0.13     | 0.08     | 0.12     | 0.14     | 0.15     | 0.19    |
| GH90       | 0.00     | 0.00     | 0.00     | 0.00     | 0.00    | 0.00     | 0.00     | 0.00     | 0.00     | 0.00     | 0.00     | 0.00     | 0.00     | 0.00     | 0.00     | 0.00    |
| GH57       | 0.12     | 0.14     | 0.14     | 0.11     | 0.14    | 0.25     | 0.00     | 0.21     | 0.13     | 0.07     | 0.11     | 0.07     | 0.15     | 0.16     | 0.11     | 0.14    |
| GH36       | 0.51     | 0.44     | 0.49     | 0.66     | 0.86    | 0.68     | 0.13     | 0.65     | 0.48     | 0.67     | 1.03     | 0.91     | 0.57     | 0.59     | 0.63     | 0.88    |
| GT46       | 0.00     | 0.00     | 0.00     | 0.00     | 0.00    | 0.00     | 0.00     | 0.00     | 0.00     | 0.00     | 0.00     | 0.00     | 0.00     | 0.00     | 0.00     | 0.00    |
| GH66       | 0.00     | 0.00     | 0.02     | 0.03     | 0.08    | 0.03     | 0.00     | 0.03     | 0.04     | 0.01     | 0.06     | 0.03     | 0.05     | 0.03     | 0.05     | 0.07    |

## Normalized\_abundance\_2

| CAZY_group | CN-AD-67 | CN-AD-68 | CN-AD-69 | CN-AD-70 | ES-AD-1 | ES-AD-10 | ES-AD-11 | ES-AD-12 | ES-AD-13 | ES-AD-14 | ES-AD-15 | ES-AD-16 | ES-AD-17 | ES-AD-18 | ES-AD-19 | ES-AD-2 |
|------------|----------|----------|----------|----------|---------|----------|----------|----------|----------|----------|----------|----------|----------|----------|----------|---------|
| GH48       | 0.00     | 0.00     | 0.00     | 0.00     | 0.00    | 0.00     | 0.00     | 0.00     | 0.00     | 0.01     | 0.00     | 0.00     | 0.01     | 0.00     | 0.00     | 0.00    |
| GT53       | 0.00     | 0.00     | 0.00     | 0.00     | 0.00    | 0.00     | 0.00     | 0.00     | 0.00     | 0.00     | 0.00     | 0.00     | 0.00     | 0.00     | 0.00     | 0.00    |
| GH60       | 0.00     | 0.00     | 0.00     | 0.00     | 0.00    | 0.00     | 0.00     | 0.00     | 0.00     | 0.00     | 0.00     | 0.00     | 0.00     | 0.00     | 0.00     | 0.00    |
| GT31       | 0.00     | 0.00     | 0.00     | 0.00     | 0.00    | 0.00     | 0.00     | 0.01     | 0.00     | 0.00     | 0.00     | 0.00     | 0.00     | 0.02     | 0.00     | 0.00    |
| GH105      | 0.36     | 0.51     | 0.49     | 0.63     | 0.82    | 0.86     | 0.13     | 0.45     | 0.38     | 0.38     | 0.69     | 0.50     | 0.54     | 0.18     | 0.37     | 0.38    |
| GT23       | 0.00     | 0.02     | 0.00     | 0.00     | 0.00    | 0.00     | 0.00     | 0.00     | 0.00     | 0.00     | 0.02     | 0.02     | 0.02     | 0.02     | 0.00     | 0.01    |
| GH11       | 0.00     | 0.00     | 0.00     | 0.00     | 0.00    | 0.00     | 0.00     | 0.00     | 0.00     | 0.00     | 0.00     | 0.00     | 0.00     | 0.00     | 0.00     | 0.00    |
| GT38       | 0.00     | 0.00     | 0.00     | 0.00     | 0.00    | 0.00     | 0.00     | 0.00     | 0.00     | 0.00     | 0.00     | 0.00     | 0.00     | 0.00     | 0.00     | 0.00    |
| GT43       | 0.00     | 0.00     | 0.00     | 0.00     | 0.00    | 0.00     | 0.00     | 0.00     | 0.00     | 0.00     | 0.00     | 0.00     | 0.00     | 0.00     | 0.00     | 0.00    |
| GH99       | 0.00     | 0.00     | 0.02     | 0.01     | 0.03    | 0.00     | 0.00     | 0.00     | 0.00     | 0.00     | 0.00     | 0.00     | 0.02     | 0.05     | 0.00     | 0.00    |
| GH38       | 0.06     | 0.12     | 0.34     | 0.27     | 0.35    | 0.10     | 0.04     | 0.14     | 0.04     | 0.25     | 0.52     | 0.51     | 0.26     | 0.08     | 0.38     | 0.16    |
| GH109      | 0.30     | 0.35     | 0.21     | 0.22     | 0.38    | 0.48     | 0.03     | 0.31     | 0.21     | 0.16     | 0.22     | 0.26     | 0.35     | 0.24     | 0.15     | 0.24    |
| GH2        | 2.50     | 3.11     | 3.78     | 4.03     | 5.31    | 5.80     | 0.63     | 3.42     | 2.55     | 2.97     | 4.70     | 4.34     | 3.99     | 2.78     | 2.63     | 4.29    |
| GT28       | 0.18     | 0.21     | 0.39     | 0.29     | 0.42    | 0.53     | 0.06     | 0.37     | 0.42     | 0.43     | 0.54     | 0.48     | 0.45     | 0.54     | 0.47     | 0.57    |
| GH42       | 0.09     | 0.09     | 0.19     | 0.37     | 0.24    | 0.10     | 0.07     | 0.10     | 0.17     | 0.36     | 0.30     | 0.35     | 0.14     | 0.14     | 0.31     | 0.24    |
| GT58       | 0.00     | 0.00     | 0.00     | 0.00     | 0.00    | 0.00     | 0.00     | 0.00     | 0.00     | 0.00     | 0.00     | 0.00     | 0.00     | 0.00     | 0.00     | 0.00    |
| GH61       | 0.00     | 0.00     | 0.00     | 0.00     | 0.00    | 0.00     | 0.00     | 0.00     | 0.00     | 0.00     | 0.00     | 0.00     | 0.00     | 0.00     | 0.00     | 0.00    |
| GH80       | 0.00     | 0.00     | 0.00     | 0.00     | 0.00    | 0.00     | 0.00     | 0.00     | 0.00     | 0.00     | 0.00     | 0.00     | 0.00     | 0.00     | 0.00     | 0.00    |
| GH98       | 0.00     | 0.00     | 0.00     | 0.01     | 0.00    | 0.05     | 0.00     | 0.01     | 0.00     | 0.00     | 0.00     | 0.00     | 0.02     | 0.02     | 0.00     | 0.00    |
| GH6        | 0.00     | 0.00     | 0.00     | 0.00     | 0.00    | 0.00     | 0.00     | 0.00     | 0.00     | 0.00     | 0.00     | 0.00     | 0.00     | 0.00     | 0.00     | 0.00    |
| GT1        | 0.00     | 0.02     | 0.05     | 0.03     | 0.05    | 0.00     | 0.00     | 0.05     | 0.01     | 0.09     | 0.09     | 0.06     | 0.00     | 0.07     | 0.12     | 0.04    |
| GH28       | 0.81     | 0.71     | 0.62     | 0.85     | 1.14    | 1.11     | 0.08     | 0.80     | 0.69     | 0.69     | 1.16     | 0.73     | 0.74     | 0.27     | 0.64     | 0.79    |
| GT42       | 0.00     | 0.00     | 0.00     | 0.00     | 0.00    | 0.00     | 0.00     | 0.00     | 0.00     | 0.00     | 0.00     | 0.00     | 0.00     | 0.00     | 0.00     | 0.00    |
| GH128      | 0.00     | 0.00     | 0.00     | 0.00     | 0.00    | 0.00     | 0.00     | 0.00     | 0.00     | 0.00     | 0.00     | 0.00     | 0.00     | 0.00     | 0.00     | 0.00    |
| CE12       | 0.18     | 0.09     | 0.09     | 0.18     | 0.20    | 0.28     | 0.00     | 0.17     | 0.10     | 0.15     | 0.19     | 0.17     | 0.11     | 0.11     | 0.07     | 0.12    |
| CE16       | 0.00     | 0.00     | 0.00     | 0.00     | 0.00    | 0.00     | 0.00     | 0.00     | 0.00     | 0.00     | 0.00     | 0.00     | 0.00     | 0.00     | 0.00     | 0.00    |
| GT89       | 0.00     | 0.00     | 0.00     | 0.00     | 0.00    | 0.00     | 0.00     | 0.00     | 0.00     | 0.00     | 0.00     | 0.00     | 0.00     | 0.00     | 0.00     | 0.00    |
| GT11       | 0.06     | 0.07     | 0.04     | 0.03     | 0.06    | 0.10     | 0.00     | 0.06     | 0.03     | 0.06     | 0.06     | 0.06     | 0.08     | 0.00     | 0.02     | 0.01    |
| GT77       | 0.00     | 0.02     | 0.00     | 0.00     | 0.00    | 0.00     | 0.00     | 0.00     | 0.00     | 0.00     | 0.00     | 0.00     | 0.00     | 0.00     | 0.00     | 0.00    |
| GT55       | 0.00     | 0.00     | 0.00     | 0.00     | 0.00    | 0.00     | 0.00     | 0.00     | 0.00     | 0.00     | 0.00     | 0.00     | 0.00     | 0.00     | 0.00     | 0.00    |
| GT18       | 0.00     | 0.00     | 0.00     | 0.00     | 0.00    | 0.00     | 0.00     | 0.00     | 0.00     | 0.00     | 0.00     | 0.00     | 0.00     | 0.00     | 0.00     | 0.00    |
| GH87       | 0.00     | 0.00     | 0.00     | 0.00     | 0.00    | 0.00     | 0.00     | 0.00     | 0.00     | 0.00     | 0.00     | 0.00     | 0.00     | 0.00     | 0.04     | 0.01    |
| PL5        | 0.00     | 0.00     | 0.00     | 0.00     | 0.00    | 0.00     | 0.00     | 0.00     | 0.00     | 0.00     | 0.00     | 0.00     | 0.00     | 0.00     | 0.00     | 0.00    |
| GH22       | 0.00     | 0.00     | 0.00     | 0.00     | 0.00    | 0.00     | 0.00     | 0.00     | 0.00     | 0.00     | 0.00     | 0.00     | 0.00     | 0.00     | 0.00     | 0.00    |
| CE2        | 0.03     | 0.02     | 0.04     | 0.03     | 0.03    | 0.05     | 0.00     | 0.05     | 0.10     | 0.07     | 0.11     | 0.15     | 0.08     | 0.07     | 0.01     | 0.04    |
| GH120      | 0.00     | 0.02     | 0.04     | 0.10     | 0.08    | 0.00     | 0.00     | 0.04     | 0.00     | 0.11     | 0.11     | 0.10     | 0.03     | 0.04     | 0.06     | 0.08    |
| GH73       | 0.24     | 0.39     | 0.32     | 0.34     | 0.39    | 0.68     | 0.11     | 0.49     | 0.52     | 0.43     | 0.54     | 0.48     | 0.32     | 0.57     | 0.68     | 0.45    |
| GT17       | 0.00     | 0.00     | 0.00     | 0.00     | 0.00    | 0.00     | 0.00     | 0.00     | 0.00     | 0.00     | 0.00     | 0.00     | 0.00     | 0.00     | 0.00     | 0.00    |
| GH124      | 0.00     | 0.00     | 0.00     | 0.00     | 0.00    | 0.00     | 0.00     | 0.00     | 0.00     | 0.00     | 0.00     | 0.00     | 0.00     | 0.00     | 0.00     | 0.00    |
| GH54       | 0.00     | 0.00     | 0.00     | 0.00     | 0.00    | 0.00     | 0.00     | 0.00     | 0.00     | 0.00     | 0.00     | 0.00     | 0.00     | 0.00     | 0.00     | 0.00    |
| GH100      | 0.00     | 0.00     | 0.00     | 0.00     | 0.00    | 0.00     | 0.00     | 0.00     | 0.00     | 0.00     | 0.00     | 0.00     | 0.00     | 0.00     | 0.00     | 0.00    |
| GH113      | 0.00     | 0.00     | 0.02     | 0.01     | 0.00    | 0.00     | 0.00     | 0.02     | 0.03     | 0.02     | 0.11     | 0.03     | 0.02     | 0.04     | 0.00     | 0.01    |
| GT5        | 0.42     | 0.21     | 0.35     | 0.44     | 0.30    | 0.46     | 0.04     | 0.42     | 0.38     | 0.40     | 0.45     | 0.39     | 0.34     | 0.47     | 0.44     | 0.54    |
| GH94       | 0.12     | 0.23     | 0.18     | 0.31     | 0.24    | 0.15     | 0.01     | 0.23     | 0.25     | 0.37     | 0.67     | 0.52     | 0.31     | 0.38     | 0.21     | 0.53    |
| GT66       | 0.00     | 0.00     | 0.00     | 0.00     | 0.02    | 0.00     | 0.00     | 0.00     | 0.03     | 0.00     | 0.00     | 0.00     | 0.00     | 0.00     | 0.01     | 0.00    |
| GT94       | 0.00     | 0.00     | 0.00     | 0.00     | 0.00    | 0.00     | 0.00     | 0.00     | 0.00     | 0.00     | 0.00     | 0.00     | 0.00     | 0.00     | 0.00     | 0.00    |
| GH58       | 0.00     | 0.00     | 0.00     | 0.00     | 0.00    | 0.00     | 0.00     | 0.00     | 0.00     | 0.00     | 0.00     | 0.00     | 0.02     | 0.00     | 0.00     | 0.00    |
| GH1        | 0.33     | 0.21     | 0.35     | 1.04     | 0.85    | 0.68     | 0.22     | 0.39     | 0.52     | 0.71     | 0.67     | 0.50     | 0.25     | 0.45     | 0.63     | 0.57    |
| PL22       | 0.00     | 0.00     | 0.04     | 0.00     | 0.00    | 0.00     | 0.00     | 0.00     | 0.00     | 0.00     | 0.00     | 0.00     | 0.00     | 0.00     | 0.00     | 0.00    |
| GT9        | 0.12     | 0.14     | 0.18     | 0.10     | 0.14    | 0.35     | 0.00     | 0.08     | 0.13     | 0.04     | 0.06     | 0.12     | 0.14     | 0.08     | 0.30     | 0.16    |

## Normalized\_abundance\_2

| CAZY_group | CN-AD-67 | CN-AD-68 | CN-AD-69 | CN-AD-70 | ES-AD-1 | ES-AD-10 | ES-AD-11 | ES-AD-12 | ES-AD-13 | ES-AD-14 | ES-AD-15 | ES-AD-16 | ES-AD-17 | ES-AD-18 | ES-AD-19 | ES-AD-2 |
|------------|----------|----------|----------|----------|---------|----------|----------|----------|----------|----------|----------|----------|----------|----------|----------|---------|
| GT76       | 0.00     | 0.00     | 0.00     | 0.00     | 0.00    | 0.00     | 0.00     | 0.00     | 0.00     | 0.00     | 0.00     | 0.00     | 0.00     | 0.00     | 0.00     | 0.00    |
| GT32       | 0.03     | 0.09     | 0.04     | 0.11     | 0.11    | 0.15     | 0.00     | 0.03     | 0.01     | 0.09     | 0.11     | 0.08     | 0.11     | 0.05     | 0.04     | 0.09    |
| GT47       | 0.03     | 0.05     | 0.02     | 0.04     | 0.08    | 0.00     | 0.00     | 0.01     | 0.03     | 0.02     | 0.06     | 0.05     | 0.05     | 0.03     | 0.05     | 0.05    |
| GH84       | 0.09     | 0.09     | 0.09     | 0.16     | 0.21    | 0.18     | 0.01     | 0.11     | 0.08     | 0.07     | 0.06     | 0.14     | 0.15     | 0.15     | 0.05     | 0.14    |
| GH83       | 0.00     | 0.00     | 0.00     | 0.00     | 0.00    | 0.00     | 0.00     | 0.00     | 0.00     | 0.00     | 0.00     | 0.00     | 0.00     | 0.00     | 0.00     | 0.00    |
| GT59       | 0.00     | 0.00     | 0.00     | 0.00     | 0.00    | 0.00     | 0.00     | 0.00     | 0.00     | 0.00     | 0.00     | 0.00     | 0.00     | 0.00     | 0.00     | 0.00    |
| GH34       | 0.00     | 0.00     | 0.00     | 0.00     | 0.00    | 0.00     | 0.00     | 0.00     | 0.00     | 0.00     | 0.00     | 0.00     | 0.00     | 0.00     | 0.00     | 0.00    |
| GT14       | 0.00     | 0.02     | 0.02     | 0.03     | 0.09    | 0.05     | 0.00     | 0.02     | 0.03     | 0.01     | 0.09     | 0.01     | 0.00     | 0.00     | 0.01     | 0.01    |
| GH47       | 0.00     | 0.00     | 0.00     | 0.00     | 0.00    | 0.00     | 0.00     | 0.00     | 0.00     | 0.00     | 0.00     | 0.00     | 0.00     | 0.00     | 0.00     | 0.00    |
| GH97       | 0.51     | 0.53     | 0.72     | 0.84     | 1.24    | 1.32     | 0.13     | 0.75     | 0.48     | 0.47     | 0.75     | 0.87     | 0.66     | 0.54     | 0.57     | 0.90    |
| GH50       | 0.06     | 0.02     | 0.02     | 0.05     | 0.05    | 0.05     | 0.00     | 0.00     | 0.00     | 0.02     | 0.04     | 0.04     | 0.00     | 0.00     | 0.05     | 0.03    |
| GT26       | 0.12     | 0.12     | 0.14     | 0.14     | 0.21    | 0.38     | 0.03     | 0.21     | 0.11     | 0.21     | 0.30     | 0.25     | 0.18     | 0.14     | 0.14     | 0.19    |
| GH18       | 0.18     | 0.28     | 0.56     | 0.62     | 0.86    | 0.61     | 0.20     | 0.47     | 0.48     | 0.55     | 0.54     | 0.79     | 0.51     | 0.39     | 0.59     | 0.45    |
| GH37       | 0.00     | 0.00     | 0.09     | 0.00     | 0.00    | 0.03     | 0.01     | 0.01     | 0.00     | 0.00     | 0.00     | 0.02     | 0.06     | 0.00     | 0.04     | 0.00    |
| PL13       | 0.03     | 0.02     | 0.07     | 0.04     | 0.05    | 0.00     | 0.00     | 0.04     | 0.01     | 0.02     | 0.00     | 0.03     | 0.05     | 0.00     | 0.01     | 0.00    |
| GH27       | 0.06     | 0.21     | 0.26     | 0.23     | 0.27    | 0.35     | 0.06     | 0.17     | 0.20     | 0.15     | 0.30     | 0.26     | 0.40     | 0.16     | 0.15     | 0.14    |
| GT54       | 0.00     | 0.00     | 0.00     | 0.00     | 0.00    | 0.00     | 0.00     | 0.00     | 0.00     | 0.00     | 0.00     | 0.00     | 0.00     | 0.00     | 0.00     | 0.00    |
| GT91       | 0.00     | 0.00     | 0.00     | 0.00     | 0.00    | 0.00     | 0.00     | 0.00     | 0.00     | 0.00     | 0.00     | 0.00     | 0.00     | 0.00     | 0.00     | 0.00    |
| GT72       | 0.00     | 0.00     | 0.00     | 0.00     | 0.00    | 0.00     | 0.00     | 0.00     | 0.00     | 0.00     | 0.00     | 0.00     | 0.00     | 0.00     | 0.00     | 0.00    |
| GH67       | 0.12     | 0.05     | 0.05     | 0.11     | 0.05    | 0.13     | 0.04     | 0.08     | 0.04     | 0.04     | 0.06     | 0.10     | 0.09     | 0.01     | 0.02     | 0.07    |
| GH12       | 0.00     | 0.00     | 0.00     | 0.00     | 0.00    | 0.00     | 0.00     | 0.00     | 0.00     | 0.00     | 0.00     | 0.00     | 0.00     | 0.00     | 0.00     | 0.00    |
| GH91       | 0.00     | 0.05     | 0.00     | 0.01     | 0.06    | 0.00     | 0.00     | 0.04     | 0.00     | 0.00     | 0.00     | 0.03     | 0.00     | 0.00     | 0.01     | 0.01    |
| GT69       | 0.00     | 0.00     | 0.00     | 0.00     | 0.00    | 0.00     | 0.00     | 0.00     | 0.00     | 0.00     | 0.00     | 0.00     | 0.00     | 0.00     | 0.00     | 0.00    |
| GH106      | 0.12     | 0.23     | 0.30     | 0.30     | 0.47    | 0.35     | 0.01     | 0.31     | 0.17     | 0.11     | 0.28     | 0.21     | 0.28     | 0.08     | 0.16     | 0.24    |
| GT62       | 0.00     | 0.00     | 0.00     | 0.00     | 0.00    | 0.00     | 0.00     | 0.00     | 0.00     | 0.00     | 0.00     | 0.00     | 0.00     | 0.00     | 0.00     | 0.00    |
| GH17       | 0.00     | 0.00     | 0.00     | 0.00     | 0.00    | 0.00     | 0.00     | 0.00     | 0.00     | 0.00     | 0.00     | 0.00     | 0.00     | 0.00     | 0.00     | 0.01    |
| GH88       | 0.21     | 0.21     | 0.35     | 0.34     | 0.55    | 0.51     | 0.15     | 0.37     | 0.21     | 0.26     | 0.28     | 0.32     | 0.23     | 0.04     | 0.14     | 0.26    |
| CE5        | 0.00     | 0.00     | 0.00     | 0.00     | 0.00    | 0.00     | 0.00     | 0.00     | 0.00     | 0.00     | 0.00     | 0.00     | 0.00     | 0.00     | 0.00     | 0.00    |
| GT8        | 0.03     | 0.02     | 0.09     | 0.07     | 0.12    | 0.08     | 0.00     | 0.08     | 0.10     | 0.19     | 0.09     | 0.18     | 0.15     | 0.04     | 0.31     | 0.18    |
| GT50       | 0.00     | 0.00     | 0.00     | 0.00     | 0.00    | 0.00     | 0.00     | 0.00     | 0.00     | 0.00     | 0.00     | 0.00     | 0.00     | 0.00     | 0.00     | 0.00    |
| GT20       | 0.06     | 0.09     | 0.11     | 0.12     | 0.20    | 0.18     | 0.03     | 0.07     | 0.06     | 0.10     | 0.06     | 0.10     | 0.09     | 0.00     | 0.04     | 0.07    |
| PL9        | 0.06     | 0.02     | 0.02     | 0.10     | 0.14    | 0.08     | 0.00     | 0.08     | 0.04     | 0.11     | 0.24     | 0.12     | 0.11     | 0.03     | 0.02     | 0.23    |
| GH55       | 0.00     | 0.02     | 0.04     | 0.01     | 0.03    | 0.05     | 0.00     | 0.01     | 0.01     | 0.01     | 0.02     | 0.02     | 0.06     | 0.00     | 0.04     | 0.01    |
| GH64       | 0.00     | 0.00     | 0.00     | 0.00     | 0.00    | 0.00     | 0.00     | 0.00     | 0.00     | 0.00     | 0.00     | 0.00     | 0.00     | 0.00     | 0.00     | 0.00    |
| GH127      | 0.12     | 0.09     | 0.26     | 0.31     | 0.36    | 0.30     | 0.03     | 0.19     | 0.28     | 0.26     | 0.32     | 0.41     | 0.28     | 0.12     | 0.22     | 0.27    |
| GH103      | 0.00     | 0.00     | 0.02     | 0.01     | 0.00    | 0.00     | 0.00     | 0.00     | 0.00     | 0.00     | 0.00     | 0.00     | 0.06     | 0.00     | 0.01     | 0.01    |
| GH3        | 1.45     | 1.93     | 1.99     | 3.08     | 3.00    | 3.24     | 0.75     | 2.18     | 1.67     | 2.33     | 3.79     | 3.14     | 2.31     | 1.99     | 2.05     | 3.04    |
| GT45       | 0.00     | 0.00     | 0.00     | 0.00     | 0.00    | 0.00     | 0.00     | 0.00     | 0.00     | 0.00     | 0.00     | 0.00     | 0.00     | 0.00     | 0.00     | 0.00    |
| GT74       | 0.00     | 0.00     | 0.00     | 0.00     | 0.00    | 0.00     | 0.00     | 0.00     | 0.00     | 0.00     | 0.00     | 0.00     | 0.00     | 0.00     | 0.00     | 0.00    |
| GT90       | 0.00     | 0.00     | 0.00     | 0.00     | 0.00    | 0.00     | 0.00     | 0.00     | 0.00     | 0.00     | 0.00     | 0.00     | 0.00     | 0.01     | 0.00     | 0.00    |
| GH116      | 0.06     | 0.05     | 0.04     | 0.07     | 0.09    | 0.05     | 0.00     | 0.06     | 0.06     | 0.06     | 0.09     | 0.04     | 0.12     | 0.03     | 0.02     | 0.07    |
| GH31       | 0.63     | 0.69     | 0.71     | 1.16     | 1.47    | 1.59     | 0.27     | 0.92     | 0.61     | 1.02     | 1.31     | 1.26     | 0.97     | 0.66     | 0.89     | 0.94    |
| GT12       | 0.00     | 0.00     | 0.00     | 0.00     | 0.00    | 0.00     | 0.00     | 0.00     | 0.00     | 0.00     | 0.00     | 0.00     | 0.00     | 0.00     | 0.00     | 0.00    |
| CE1        | 0.21     | 0.23     | 0.49     | 0.31     | 0.53    | 0.73     | 0.10     | 0.43     | 0.34     | 0.32     | 0.32     | 0.55     | 0.26     | 0.42     | 0.40     | 0.46    |
| GH121      | 0.00     | 0.00     | 0.00     | 0.00     | 0.03    | 0.00     | 0.00     | 0.00     | 0.00     | 0.05     | 0.00     | 0.01     | 0.02     | 0.00     | 0.00     | 0.01    |
| GH79       | 0.00     | 0.00     | 0.00     | 0.00     | 0.00    | 0.00     | 0.00     | 0.00     | 0.00     | 0.00     | 0.00     | 0.00     | 0.00     | 0.00     | 0.00     | 0.01    |
| GT73       | 0.00     | 0.00     | 0.02     | 0.00     | 0.00    | 0.00     | 0.00     | 0.00     | 0.00     | 0.00     | 0.00     | 0.00     | 0.02     | 0.00     | 0.00     | 0.00    |
| GH77       | 0.33     | 0.48     | 0.42     | 0.56     | 0.83    | 0.63     | 0.07     | 0.50     | 0.65     | 0.77     | 0.75     | 0.67     | 0.62     | 0.59     | 0.51     | 0.83    |
| PL17       | 0.00     | 0.02     | 0.00     | 0.00     | 0.00    | 0.00     | 0.00     | 0.00     | 0.01     | 0.00     | 0.00     | 0.00     | 0.00     | 0.00     | 0.00     | 0.00    |
| PL8        | 0.15     | 0.23     | 0.19     | 0.37     | 0.33    | 0.43     | 0.01     | 0.24     | 0.21     | 0.04     | 0.11     | 0.28     | 0.18     | 0.12     | 0.14     | 0.16    |

Normalized\_abundance\_2

| CAZY_group | CN-AD-67 | CN-AD-68 | CN-AD-69 | CN-AD-70 | ES-AD-1 | ES-AD-10 | ES-AD-11 | ES-AD-12 | ES-AD-13 | ES-AD-14 | ES-AD-15 | ES-AD-16 | ES-AD-17 | ES-AD-18 | ES-AD-19 | ES-AD-2 |
|------------|----------|----------|----------|----------|---------|----------|----------|----------|----------|----------|----------|----------|----------|----------|----------|---------|
| CE9        | 0.30     | 0.37     | 0.25     | 0.41     | 0.36    | 0.43     | 0.13     | 0.36     | 0.35     | 0.42     | 0.34     | 0.41     | 0.40     | 0.26     | 0.41     | 0.43    |
| CE15       | 0.00     | 0.02     | 0.02     | 0.00     | 0.03    | 0.03     | 0.00     | 0.01     | 0.00     | 0.01     | 0.00     | 0.04     | 0.02     | 0.00     | 0.01     | 0.00    |
| GT79       | 0.00     | 0.00     | 0.00     | 0.00     | 0.00    | 0.00     | 0.00     | 0.00     | 0.00     | 0.00     | 0.00     | 0.00     | 0.00     | 0.00     | 0.00     | 0.00    |
| GT10       | 0.00     | 0.00     | 0.00     | 0.00     | 0.00    | 0.00     | 0.00     | 0.01     | 0.01     | 0.00     | 0.00     | 0.01     | 0.00     | 0.00     | 0.00     | 0.00    |
| GH119      | 0.00     | 0.00     | 0.00     | 0.00     | 0.00    | 0.00     | 0.00     | 0.00     | 0.00     | 0.00     | 0.00     | 0.00     | 0.00     | 0.00     | 0.00     | 0.00    |
| GH16       | 0.09     | 0.09     | 0.23     | 0.19     | 0.27    | 0.25     | 0.01     | 0.15     | 0.11     | 0.09     | 0.17     | 0.24     | 0.23     | 0.15     | 0.12     | 0.16    |
| GH43       | 1.48     | 2.05     | 2.22     | 2.31     | 2.32    | 3.24     | 0.32     | 1.62     | 1.13     | 1.64     | 2.26     | 2.19     | 1.96     | 0.89     | 1.32     | 1.95    |
| GH51       | 0.30     | 0.37     | 0.56     | 0.44     | 0.64    | 0.51     | 0.04     | 0.47     | 0.35     | 0.61     | 0.50     | 0.67     | 0.43     | 0.28     | 0.42     | 0.43    |
| GT35       | 0.42     | 0.83     | 0.56     | 0.78     | 1.27    | 0.73     | 0.21     | 0.68     | 0.79     | 0.94     | 1.12     | 0.84     | 0.97     | 0.88     | 0.73     | 1.18    |
| GT25       | 0.00     | 0.00     | 0.02     | 0.00     | 0.02    | 0.00     | 0.00     | 0.00     | 0.00     | 0.01     | 0.00     | 0.00     | 0.00     | 0.00     | 0.01     | 0.00    |
| GT2        | 2.68     | 3.25     | 3.65     | 3.77     | 6.77    | 5.49     | 0.78     | 3.93     | 3.31     | 4.59     | 5.22     | 4.84     | 4.04     | 3.39     | 3.93     | 7.19    |
| GT51       | 0.51     | 0.60     | 0.65     | 0.70     | 1.06    | 1.04     | 0.21     | 0.85     | 0.83     | 0.96     | 1.03     | 1.11     | 0.85     | 0.80     | 1.04     | 1.25    |
| GH107      | 0.00     | 0.00     | 0.00     | 0.00     | 0.00    | 0.00     | 0.00     | 0.00     | 0.00     | 0.00     | 0.00     | 0.00     | 0.00     | 0.00     | 0.00     | 0.00    |
| GH7        | 0.00     | 0.00     | 0.00     | 0.00     | 0.00    | 0.00     | 0.00     | 0.00     | 0.00     | 0.00     | 0.00     | 0.00     | 0.00     | 0.00     | 0.00     | 0.00    |
| GT7        | 0.00     | 0.00     | 0.00     | 0.00     | 0.00    | 0.00     | 0.00     | 0.00     | 0.00     | 0.00     | 0.00     | 0.00     | 0.00     | 0.00     | 0.00     | 0.00    |
| GT36       | 0.00     | 0.00     | 0.00     | 0.00     | 0.00    | 0.00     | 0.00     | 0.00     | 0.00     | 0.00     | 0.00     | 0.00     | 0.00     | 0.00     | 0.00     | 0.00    |
| PL7        | 0.00     | 0.00     | 0.00     | 0.00     | 0.00    | 0.00     | 0.00     | 0.00     | 0.00     | 0.00     | 0.00     | 0.00     | 0.00     | 0.00     | 0.00     | 0.00    |
| GH110      | 0.12     | 0.16     | 0.09     | 0.08     | 0.18    | 0.15     | 0.00     | 0.04     | 0.07     | 0.04     | 0.02     | 0.10     | 0.09     | 0.14     | 0.02     | 0.08    |
| GT21       | 0.00     | 0.00     | 0.00     | 0.00     | 0.00    | 0.00     | 0.00     | 0.00     | 0.00     | 0.00     | 0.00     | 0.00     | 0.00     | 0.00     | 0.00     | 0.00    |
| GH62       | 0.00     | 0.00     | 0.00     | 0.00     | 0.02    | 0.00     | 0.00     | 0.00     | 0.00     | 0.00     | 0.00     | 0.00     | 0.00     | 0.00     | 0.00     | 0.00    |
| GH125      | 0.06     | 0.21     | 0.18     | 0.21     | 0.59    | 0.25     | 0.11     | 0.10     | 0.04     | 0.19     | 0.30     | 0.20     | 0.17     | 0.11     | 0.15     | 0.11    |
| GH117      | 0.09     | 0.12     | 0.12     | 0.07     | 0.15    | 0.10     | 0.00     | 0.12     | 0.06     | 0.05     | 0.06     | 0.08     | 0.12     | 0.08     | 0.09     | 0.08    |
| GH68       | 0.00     | 0.00     | 0.00     | 0.00     | 0.00    | 0.00     | 0.00     | 0.00     | 0.00     | 0.00     | 0.00     | 0.00     | 0.00     | 0.00     | 0.05     | 0.00    |
| GH85       | 0.00     | 0.05     | 0.00     | 0.00     | 0.08    | 0.00     | 0.00     | 0.01     | 0.00     | 0.06     | 0.04     | 0.02     | 0.03     | 0.04     | 0.06     | 0.01    |
| GH92       | 1.15     | 1.34     | 1.80     | 1.79     | 2.27    | 2.76     | 0.20     | 1.37     | 0.81     | 0.89     | 1.16     | 1.95     | 1.46     | 1.05     | 1.11     | 1.14    |
| GH40       | 0.00     | 0.00     | 0.00     | 0.00     | 0.00    | 0.00     | 0.00     | 0.00     | 0.00     | 0.00     | 0.00     | 0.00     | 0.00     | 0.00     | 0.00     | 0.00    |
| GT49       | 0.00     | 0.00     | 0.00     | 0.00     | 0.00    | 0.00     | 0.00     | 0.00     | 0.00     | 0.00     | 0.00     | 0.00     | 0.00     | 0.00     | 0.00     | 0.00    |
| GH112      | 0.09     | 0.09     | 0.05     | 0.23     | 0.21    | 0.13     | 0.08     | 0.11     | 0.10     | 0.26     | 0.26     | 0.11     | 0.08     | 0.11     | 0.19     | 0.34    |
| GT67       | 0.00     | 0.00     | 0.00     | 0.00     | 0.00    | 0.00     | 0.00     | 0.00     | 0.00     | 0.00     | 0.00     | 0.00     | 0.00     | 0.00     | 0.00     | 0.00    |
| CE8        | 0.15     | 0.21     | 0.19     | 0.23     | 0.27    | 0.13     | 0.03     | 0.22     | 0.30     | 0.21     | 0.28     | 0.25     | 0.22     | 0.09     | 0.10     | 0.12    |
| GT86       | 0.00     | 0.00     | 0.00     | 0.00     | 0.00    | 0.00     | 0.00     | 0.00     | 0.00     | 0.00     | 0.00     | 0.00     | 0.00     | 0.00     | 0.00     | 0.00    |
| GH101      | 0.00     | 0.00     | 0.00     | 0.07     | 0.03    | 0.00     | 0.00     | 0.00     | 0.00     | 0.06     | 0.00     | 0.00     | 0.03     | 0.00     | 0.00     | 0.01    |
| GH81       | 0.00     | 0.00     | 0.02     | 0.00     | 0.00    | 0.00     | 0.00     | 0.00     | 0.00     | 0.00     | 0.00     | 0.00     | 0.00     | 0.00     | 0.00     | 0.00    |
| GT93       | 0.00     | 0.00     | 0.00     | 0.00     | 0.00    | 0.00     | 0.00     | 0.00     | 0.00     | 0.00     | 0.00     | 0.00     | 0.00     | 0.00     | 0.00     | 0.00    |
| GT63       | 0.00     | 0.00     | 0.00     | 0.00     | 0.00    | 0.00     | 0.00     | 0.00     | 0.00     | 0.00     | 0.00     | 0.00     | 0.00     | 0.00     | 0.00     | 0.00    |
| CE11       | 0.15     | 0.21     | 0.23     | 0.11     | 0.18    | 0.25     | 0.04     | 0.19     | 0.25     | 0.22     | 0.24     | 0.27     | 0.25     | 0.22     | 0.22     | 0.20    |
| GT19       | 0.15     | 0.16     | 0.18     | 0.07     | 0.23    | 0.28     | 0.01     | 0.17     | 0.11     | 0.10     | 0.15     | 0.15     | 0.15     | 0.14     | 0.16     | 0.18    |
| GT33       | 0.00     | 0.00     | 0.00     | 0.00     | 0.00    | 0.00     | 0.00     | 0.00     | 0.00     | 0.00     | 0.00     | 0.00     | 0.00     | 0.00     | 0.00     | 0.00    |
| GH21       | 0.00     | 0.00     | 0.00     | 0.00     | 0.00    | 0.00     | 0.00     | 0.00     | 0.00     | 0.00     | 0.00     | 0.00     | 0.00     | 0.00     | 0.00     | 0.00    |
| GT68       | 0.00     | 0.00     | 0.00     | 0.00     | 0.00    | 0.00     | 0.00     | 0.00     | 0.00     | 0.00     | 0.00     | 0.00     | 0.00     | 0.00     | 0.00     | 0.00    |
| GH89       | 0.21     | 0.25     | 0.23     | 0.23     | 0.33    | 0.38     | 0.03     | 0.23     | 0.11     | 0.17     | 0.19     | 0.20     | 0.14     | 0.14     | 0.15     | 0.18    |
| GT82       | 0.00     | 0.00     | 0.00     | 0.00     | 0.00    | 0.00     | 0.00     | 0.00     | 0.00     | 0.01     | 0.00     | 0.00     | 0.00     | 0.00     | 0.00     | 0.00    |
| GH30       | 0.09     | 0.21     | 0.23     | 0.26     | 0.36    | 0.38     | 0.03     | 0.10     | 0.17     | 0.19     | 0.30     | 0.23     | 0.20     | 0.08     | 0.15     | 0.24    |
| GH20       | 0.78     | 0.90     | 1.01     | 1.29     | 1.97    | 1.95     | 0.13     | 1.16     | 0.62     | 0.79     | 0.91     | 1.52     | 1.13     | 0.68     | 0.75     | 0.69    |
| GH52       | 0.00     | 0.00     | 0.00     | 0.00     | 0.00    | 0.00     | 0.00     | 0.00     | 0.00     | 0.00     | 0.00     | 0.00     | 0.00     | 0.00     | 0.00     | 0.00    |
| GT84       | 0.00     | 0.00     | 0.00     | 0.00     | 0.00    | 0.00     | 0.00     | 0.00     | 0.01     | 0.02     | 0.02     | 0.00     | 0.02     | 0.04     | 0.00     | 0.03    |
| GT15       | 0.00     | 0.00     | 0.00     | 0.00     | 0.00    | 0.00     | 0.00     | 0.00     | 0.00     | 0.00     | 0.00     | 0.00     | 0.00     | 0.00     | 0.00     | 0.00    |
| GH93       | 0.00     | 0.00     | 0.02     | 0.00     | 0.02    | 0.00     | 0.00     | 0.00     | 0.00     | 0.00     | 0.00     | 0.00     | 0.00     | 0.00     | 0.00     | 0.00    |
| PL16       | 0.00     | 0.00     | 0.00     | 0.00     | 0.00    | 0.00     | 0.00     | 0.00     | 0.00     | 0.00     | 0.00     | 0.00     | 0.00     | 0.00     | 0.00     | 0.00    |
| GH26       | 0.03     | 0.02     | 0.07     | 0.12     | 0.17    | 0.13     | 0.00     | 0.04     | 0.16     | 0.16     | 0.26     | 0.22     | 0.28     | 0.14     | 0.04     | 0.22    |

Normalized\_abundance\_2

| CAZY_group | CN-AD-67 | CN-AD-68 | CN-AD-69 | CN-AD-70 | ES-AD-1 | ES-AD-10 | ES-AD-11 | ES-AD-12 | ES-AD-13 | ES-AD-14 | ES-AD-15 | ES-AD-16 | ES-AD-17 | ES-AD-18 | ES-AD-19 | ES-AD-2 |
|------------|----------|----------|----------|----------|---------|----------|----------|----------|----------|----------|----------|----------|----------|----------|----------|---------|
| GT75       | 0.00     | 0.00     | 0.00     | 0.00     | 0.00    | 0.00     | 0.00     | 0.00     | 0.00     | 0.00     | 0.00     | 0.00     | 0.00     | 0.00     | 0.00     | 0.00    |
| GH53       | 0.00     | 0.05     | 0.09     | 0.10     | 0.05    | 0.20     | 0.00     | 0.16     | 0.16     | 0.26     | 0.34     | 0.10     | 0.08     | 0.12     | 0.09     | 0.11    |
| GT88       | 0.00     | 0.00     | 0.00     | 0.00     | 0.00    | 0.00     | 0.00     | 0.00     | 0.00     | 0.00     | 0.00     | 0.00     | 0.00     | 0.00     | 0.00     | 0.00    |
| GT24       | 0.00     | 0.00     | 0.00     | 0.00     | 0.00    | 0.00     | 0.00     | 0.00     | 0.00     | 0.00     | 0.00     | 0.00     | 0.00     | 0.00     | 0.00     | 0.00    |
| GT81       | 0.00     | 0.00     | 0.00     | 0.00     | 0.00    | 0.00     | 0.00     | 0.00     | 0.00     | 0.00     | 0.00     | 0.00     | 0.00     | 0.00     | 0.00     | 0.00    |
| GH4        | 0.15     | 0.05     | 0.19     | 0.16     | 0.23    | 0.18     | 0.07     | 0.13     | 0.13     | 0.17     | 0.15     | 0.13     | 0.25     | 0.16     | 0.28     | 0.15    |
| GT78       | 0.00     | 0.00     | 0.00     | 0.00     | 0.00    | 0.00     | 0.00     | 0.00     | 0.00     | 0.00     | 0.00     | 0.00     | 0.00     | 0.00     | 0.00     | 0.00    |
| GH8        | 0.00     | 0.00     | 0.07     | 0.00     | 0.03    | 0.03     | 0.00     | 0.06     | 0.03     | 0.05     | 0.13     | 0.04     | 0.06     | 0.08     | 0.04     | 0.04    |
| GH70       | 0.00     | 0.00     | 0.00     | 0.00     | 0.00    | 0.00     | 0.00     | 0.00     | 0.00     | 0.00     | 0.00     | 0.00     | 0.00     | 0.01     | 0.23     | 0.01    |
| GH122      | 0.00     | 0.00     | 0.00     | 0.00     | 0.00    | 0.00     | 0.00     | 0.00     | 0.00     | 0.00     | 0.00     | 0.00     | 0.00     | 0.00     | 0.00     | 0.00    |
| GH74       | 0.00     | 0.02     | 0.02     | 0.00     | 0.02    | 0.00     | 0.00     | 0.02     | 0.04     | 0.01     | 0.06     | 0.04     | 0.03     | 0.05     | 0.00     | 0.01    |
| GT41       | 0.00     | 0.00     | 0.00     | 0.01     | 0.02    | 0.00     | 0.00     | 0.01     | 0.01     | 0.04     | 0.02     | 0.00     | 0.00     | 0.00     | 0.02     | 0.00    |
| PL1        | 0.24     | 0.18     | 0.26     | 0.31     | 0.29    | 0.33     | 0.03     | 0.29     | 0.14     | 0.20     | 0.30     | 0.24     | 0.31     | 0.14     | 0.14     | 0.39    |
| GH15       | 0.03     | 0.02     | 0.07     | 0.07     | 0.09    | 0.15     | 0.00     | 0.04     | 0.03     | 0.09     | 0.04     | 0.04     | 0.08     | 0.00     | 0.04     | 0.01    |
| GH32       | 0.30     | 0.23     | 0.35     | 0.64     | 0.65    | 0.56     | 0.10     | 0.45     | 0.37     | 0.48     | 0.58     | 0.62     | 0.37     | 0.23     | 0.59     | 0.61    |
| GH44       | 0.00     | 0.00     | 0.00     | 0.00     | 0.00    | 0.00     | 0.00     | 0.00     | 0.00     | 0.00     | 0.02     | 0.00     | 0.03     | 0.00     | 0.00     | 0.00    |
| GT6        | 0.00     | 0.00     | 0.00     | 0.00     | 0.00    | 0.00     | 0.00     | 0.00     | 0.00     | 0.00     | 0.00     | 0.01     | 0.02     | 0.00     | 0.01     | 0.00    |
| GH13       | 1.45     | 2.23     | 2.65     | 2.89     | 3.19    | 3.27     | 0.70     | 2.79     | 2.90     | 3.86     | 4.66     | 3.56     | 2.57     | 3.01     | 3.04     | 3.87    |
| GT80       | 0.00     | 0.00     | 0.02     | 0.01     | 0.05    | 0.00     | 0.01     | 0.01     | 0.00     | 0.00     | 0.00     | 0.04     | 0.00     | 0.00     | 0.00     | 0.00    |
| GH71       | 0.00     | 0.00     | 0.00     | 0.00     | 0.00    | 0.00     | 0.00     | 0.00     | 0.00     | 0.00     | 0.00     | 0.00     | 0.00     | 0.00     | 0.00     | 0.00    |
| GH63       | 0.06     | 0.18     | 0.11     | 0.14     | 0.17    | 0.18     | 0.00     | 0.08     | 0.08     | 0.09     | 0.13     | 0.06     | 0.18     | 0.12     | 0.10     | 0.08    |
| PL21       | 0.12     | 0.09     | 0.04     | 0.00     | 0.03    | 0.00     | 0.00     | 0.03     | 0.03     | 0.00     | 0.00     | 0.00     | 0.03     | 0.00     | 0.02     | 0.00    |
| GH65       | 0.06     | 0.09     | 0.12     | 0.05     | 0.17    | 0.13     | 0.07     | 0.13     | 0.14     | 0.11     | 0.24     | 0.18     | 0.12     | 0.05     | 0.23     | 0.14    |
| CE4        | 0.27     | 0.32     | 0.49     | 0.47     | 0.50    | 0.48     | 0.14     | 0.52     | 0.68     | 0.78     | 0.78     | 0.66     | 0.60     | 0.65     | 0.44     | 0.49    |
| CE14       | 0.00     | 0.02     | 0.05     | 0.00     | 0.02    | 0.03     | 0.03     | 0.00     | 0.00     | 0.00     | 0.02     | 0.02     | 0.03     | 0.03     | 0.00     | 0.01    |
| GH115      | 0.12     | 0.09     | 0.12     | 0.33     | 0.23    | 0.46     | 0.07     | 0.27     | 0.14     | 0.15     | 0.37     | 0.39     | 0.17     | 0.09     | 0.17     | 0.20    |
| GH104      | 0.00     | 0.00     | 0.00     | 0.00     | 0.00    | 0.00     | 0.00     | 0.00     | 0.00     | 0.00     | 0.00     | 0.00     | 0.02     | 0.00     | 0.02     | 0.00    |
| GH111      | 0.00     | 0.00     | 0.00     | 0.00     | 0.00    | 0.00     | 0.00     | 0.00     | 0.00     | 0.00     | 0.00     | 0.00     | 0.00     | 0.00     | 0.00     | 0.00    |
| GH95       | 0.48     | 0.60     | 0.58     | 0.68     | 0.70    | 0.73     | 0.07     | 0.72     | 0.41     | 0.31     | 0.54     | 0.61     | 0.51     | 0.36     | 0.31     | 0.73    |
| GT70       | 0.00     | 0.00     | 0.00     | 0.00     | 0.00    | 0.00     | 0.00     | 0.00     | 0.00     | 0.00     | 0.00     | 0.00     | 0.00     | 0.00     | 0.00     | 0.00    |
| CE10       | 0.15     | 0.12     | 0.12     | 0.21     | 0.20    | 0.25     | 0.10     | 0.15     | 0.06     | 0.16     | 0.15     | 0.23     | 0.26     | 0.09     | 0.16     | 0.24    |
| GH10       | 0.03     | 0.07     | 0.14     | 0.11     | 0.08    | 0.13     | 0.01     | 0.13     | 0.08     | 0.12     | 0.11     | 0.14     | 0.06     | 0.05     | 0.05     | 0.05    |
| GH130      | 0.24     | 0.32     | 0.18     | 0.44     | 0.44    | 0.58     | 0.08     | 0.35     | 0.23     | 0.30     | 0.45     | 0.47     | 0.29     | 0.31     | 0.17     | 0.22    |
| PL20       | 0.00     | 0.00     | 0.00     | 0.00     | 0.00    | 0.00     | 0.00     | 0.00     | 0.00     | 0.00     | 0.00     | 0.00     | 0.00     | 0.00     | 0.00     | 0.00    |
| GH69       | 0.00     | 0.00     | 0.00     | 0.00     | 0.00    | 0.00     | 0.00     | 0.00     | 0.00     | 0.00     | 0.00     | 0.00     | 0.00     | 0.00     | 0.00     | 0.00    |
| PL2        | 0.00     | 0.00     | 0.00     | 0.00     | 0.00    | 0.00     | 0.00     | 0.00     | 0.00     | 0.00     | 0.00     | 0.00     | 0.00     | 0.00     | 0.01     | 0.00    |
| GH49       | 0.00     | 0.00     | 0.00     | 0.00     | 0.00    | 0.00     | 0.00     | 0.00     | 0.00     | 0.00     | 0.00     | 0.00     | 0.00     | 0.00     | 0.00     | 0.00    |
| GH25       | 0.27     | 0.28     | 0.19     | 0.25     | 0.45    | 0.48     | 0.07     | 0.33     | 0.35     | 0.48     | 0.65     | 0.47     | 0.39     | 0.41     | 0.64     | 0.46    |
| GH59       | 0.00     | 0.02     | 0.00     | 0.00     | 0.00    | 0.00     | 0.00     | 0.01     | 0.01     | 0.00     | 0.04     | 0.01     | 0.03     | 0.03     | 0.00     | 0.03    |
| GH35       | 0.12     | 0.25     | 0.26     | 0.41     | 0.56    | 0.51     | 0.13     | 0.22     | 0.23     | 0.19     | 0.39     | 0.48     | 0.31     | 0.19     | 0.16     | 0.30    |
| GT39       | 0.00     | 0.00     | 0.00     | 0.00     | 0.02    | 0.00     | 0.00     | 0.00     | 0.00     | 0.00     | 0.00     | 0.00     | 0.00     | 0.00     | 0.01     | 0.01    |
| GT57       | 0.00     | 0.00     | 0.00     | 0.00     | 0.00    | 0.00     | 0.00     | 0.00     | 0.00     | 0.00     | 0.00     | 0.00     | 0.00     | 0.00     | 0.00     | 0.00    |
| GH129      | 0.00     | 0.00     | 0.00     | 0.07     | 0.05    | 0.00     | 0.03     | 0.01     | 0.01     | 0.04     | 0.00     | 0.02     | 0.02     | 0.01     | 0.01     | 0.01    |
| GT22       | 0.00     | 0.00     | 0.00     | 0.00     | 0.00    | 0.00     | 0.00     | 0.00     | 0.00     | 0.00     | 0.00     | 0.00     | 0.00     | 0.00     | 0.00     | 0.00    |
| PL12       | 0.09     | 0.12     | 0.16     | 0.11     | 0.12    | 0.00     | 0.01     | 0.07     | 0.01     | 0.07     | 0.02     | 0.09     | 0.06     | 0.00     | 0.07     | 0.03    |
| PL18       | 0.00     | 0.00     | 0.00     | 0.00     | 0.00    | 0.00     | 0.00     | 0.00     | 0.00     | 0.00     | 0.00     | 0.00     | 0.00     | 0.00     | 0.00     | 0.00    |
| GT92       | 0.00     | 0.00     | 0.00     | 0.00     | 0.00    | 0.00     | 0.00     | 0.00     | 0.00     | 0.00     | 0.00     | 0.00     | 0.00     | 0.00     | 0.00     | 0.00    |
| GT44       | 0.00     | 0.00     | 0.00     | 0.00     | 0.00    | 0.00     | 0.00     | 0.01     | 0.00     | 0.00     | 0.00     | 0.00     | 0.00     | 0.00     | 0.00     | 0.00    |
| GT29       | 0.00     | 0.00     | 0.00     | 0.00     | 0.00    | 0.00     | 0.00     | 0.00     | 0.00     | 0.00     | 0.00     | 0.00     | 0.00     | 0.00     | 0.00     | 0.00    |
| GT13       | 0.00     | 0.00     | 0.00     | 0.00     | 0.00    | 0.00     | 0.00     | 0.00     | 0.00     | 0.00     | 0.00     | 0.00     | 0.00     | 0.00     | 0.00     | 0.00    |

Normalized\_abundance\_2

| CAZY_group | CN-AD-67 | CN-AD-68 | CN-AD-69 | CN-AD-70 | ES-AD-1 | ES-AD-10 | ES-AD-11 | ES-AD-12 | ES-AD-13 | ES-AD-14 | ES-AD-15 | ES-AD-16 | ES-AD-17 | ES-AD-18 | ES-AD-19 | ES-AD-2 |
|------------|----------|----------|----------|----------|---------|----------|----------|----------|----------|----------|----------|----------|----------|----------|----------|---------|
| GT52       | 0.00     | 0.00     | 0.00     | 0.00     | 0.00    | 0.00     | 0.00     | 0.00     | 0.00     | 0.00     | 0.00     | 0.00     | 0.00     | 0.00     | 0.00     | 0.00    |
| GT64       | 0.00     | 0.00     | 0.00     | 0.00     | 0.00    | 0.00     | 0.00     | 0.00     | 0.00     | 0.00     | 0.00     | 0.00     | 0.00     | 0.00     | 0.00     | 0.00    |
| GT85       | 0.00     | 0.00     | 0.00     | 0.00     | 0.00    | 0.00     | 0.00     | 0.00     | 0.00     | 0.00     | 0.00     | 0.00     | 0.00     | 0.00     | 0.00     | 0.00    |
| GT16       | 0.00     | 0.00     | 0.00     | 0.00     | 0.00    | 0.00     | 0.00     | 0.00     | 0.00     | 0.00     | 0.00     | 0.00     | 0.00     | 0.00     | 0.00     | 0.00    |
| GH56       | 0.00     | 0.00     | 0.00     | 0.00     | 0.00    | 0.00     | 0.00     | 0.00     | 0.00     | 0.00     | 0.00     | 0.00     | 0.00     | 0.00     | 0.00     | 0.00    |
| GT60       | 0.00     | 0.00     | 0.00     | 0.00     | 0.00    | 0.00     | 0.00     | 0.00     | 0.00     | 0.00     | 0.00     | 0.00     | 0.00     | 0.00     | 0.00     | 0.00    |
| GH41       | 0.00     | 0.00     | 0.00     | 0.00     | 0.00    | 0.00     | 0.00     | 0.00     | 0.00     | 0.00     | 0.00     | 0.00     | 0.00     | 0.00     | 0.00     | 0.00    |
| CE7        | 0.03     | 0.12     | 0.04     | 0.10     | 0.23    | 0.20     | 0.00     | 0.11     | 0.07     | 0.11     | 0.13     | 0.12     | 0.09     | 0.03     | 0.10     | 0.05    |
| GH39       | 0.00     | 0.05     | 0.09     | 0.07     | 0.03    | 0.00     | 0.01     | 0.02     | 0.03     | 0.02     | 0.06     | 0.06     | 0.03     | 0.04     | 0.01     | 0.01    |
| GT30       | 0.36     | 0.21     | 0.26     | 0.21     | 0.35    | 0.40     | 0.03     | 0.21     | 0.10     | 0.17     | 0.17     | 0.22     | 0.28     | 0.15     | 0.23     | 0.24    |
| PL15       | 0.06     | 0.09     | 0.09     | 0.16     | 0.14    | 0.10     | 0.01     | 0.07     | 0.01     | 0.05     | 0.09     | 0.11     | 0.06     | 0.00     | 0.09     | 0.12    |
| GH102      | 0.00     | 0.00     | 0.07     | 0.04     | 0.06    | 0.00     | 0.01     | 0.02     | 0.00     | 0.04     | 0.00     | 0.02     | 0.09     | 0.01     | 0.01     | 0.04    |

Normalized\_abundance\_2

| CAZY_group | ES-AD-20 | ES-AD-21 | ES-AD-22 | ES-AD-23 | ES-AD-24 | ES-AD-25 | ES-AD-26 | ES-AD-27 | ES-AD-28 | ES-AD-29 | ES-AD-3 | ES-AD-30 | ES-AD-31 | ES-AD-32 | ES-AD-33 | ES-AD-34 |
|------------|----------|----------|----------|----------|----------|----------|----------|----------|----------|----------|---------|----------|----------|----------|----------|----------|
| GH29       | 0.61     | 0.54     | 0.67     | 0.52     | 0.76     | 0.63     | 0.70     | 0.68     | 0.63     | 0.57     | 0.98    | 0.92     | 0.54     | 0.47     | 0.82     | 0.79     |
| PL4        | 0.00     | 0.00     | 0.00     | 0.00     | 0.00     | 0.02     | 0.00     | 0.01     | 0.00     | 0.00     | 0.00    | 0.00     | 0.00     | 0.00     | 0.00     | 0.00     |
| GH23       | 1.08     | 1.07     | 0.90     | 0.83     | 1.11     | 0.96     | 1.15     | 0.73     | 0.77     | 0.86     | 1.91    | 1.23     | 1.12     | 1.11     | 1.08     | 1.13     |
| CE6        | 0.02     | 0.00     | 0.01     | 0.00     | 0.07     | 0.02     | 0.03     | 0.04     | 0.01     | 0.02     | 0.06    | 0.01     | 0.00     | 0.00     | 0.03     | 0.04     |
| GH72       | 0.14     | 0.08     | 0.09     | 0.07     | 0.10     | 0.12     | 0.12     | 0.13     | 0.06     | 0.10     | 0.17    | 0.05     | 0.12     | 0.09     | 0.12     | 0.05     |
| GH114      | 0.00     | 0.00     | 0.00     | 0.00     | 0.00     | 0.00     | 0.00     | 0.00     | 0.00     | 0.00     | 0.00    | 0.00     | 0.00     | 0.00     | 0.00     | 0.00     |
| GH78       | 1.06     | 0.34     | 0.52     | 0.59     | 0.98     | 0.64     | 0.86     | 0.50     | 0.63     | 0.87     | 1.26    | 0.94     | 0.54     | 0.47     | 0.44     | 0.96     |
| PL19       | 0.00     | 0.00     | 0.00     | 0.00     | 0.00     | 0.00     | 0.00     | 0.00     | 0.00     | 0.00     | 0.00    | 0.00     | 0.00     | 0.00     | 0.00     | 0.00     |
| GT27       | 0.00     | 0.00     | 0.00     | 0.00     | 0.00     | 0.00     | 0.00     | 0.00     | 0.00     | 0.00     | 0.00    | 0.00     | 0.00     | 0.00     | 0.00     | 0.00     |
| GH5        | 0.31     | 0.48     | 0.49     | 0.31     | 0.47     | 0.48     | 0.31     | 0.33     | 0.29     | 0.56     | 0.25    | 0.26     | 0.41     | 0.35     | 0.55     | 0.34     |
| GT40       | 0.00     | 0.00     | 0.00     | 0.00     | 0.00     | 0.00     | 0.00     | 0.00     | 0.00     | 0.00     | 0.00    | 0.00     | 0.00     | 0.00     | 0.00     | 0.00     |
| CE13       | 0.02     | 0.00     | 0.00     | 0.00     | 0.00     | 0.00     | 0.00     | 0.00     | 0.00     | 0.00     | 0.00    | 0.00     | 0.00     | 0.00     | 0.00     | 0.00     |
| GT37       | 0.00     | 0.00     | 0.00     | 0.00     | 0.00     | 0.00     | 0.00     | 0.00     | 0.00     | 0.00     | 0.00    | 0.00     | 0.00     | 0.00     | 0.00     | 0.00     |
| GH33       | 0.17     | 0.09     | 0.14     | 0.11     | 0.30     | 0.12     | 0.27     | 0.13     | 0.21     | 0.19     | 0.30    | 0.22     | 0.17     | 0.14     | 0.18     | 0.25     |
| GT65       | 0.00     | 0.00     | 0.00     | 0.00     | 0.00     | 0.00     | 0.00     | 0.00     | 0.00     | 0.00     | 0.00    | 0.00     | 0.00     | 0.00     | 0.00     | 0.00     |
| GH86       | 0.00     | 0.00     | 0.00     | 0.00     | 0.01     | 0.01     | 0.00     | 0.00     | 0.01     | 0.00     | 0.01    | 0.00     | 0.00     | 0.00     | 0.00     | 0.00     |
| GH123      | 0.09     | 0.04     | 0.12     | 0.07     | 0.18     | 0.09     | 0.13     | 0.08     | 0.12     | 0.18     | 0.06    | 0.14     | 0.09     | 0.05     | 0.13     | 0.13     |
| GH96       | 0.00     | 0.00     | 0.00     | 0.00     | 0.00     | 0.00     | 0.00     | 0.00     | 0.00     | 0.00     | 0.00    | 0.00     | 0.00     | 0.00     | 0.00     | 0.00     |
| GH14       | 0.00     | 0.00     | 0.00     | 0.00     | 0.00     | 0.00     | 0.00     | 0.00     | 0.00     | 0.00     | 0.00    | 0.00     | 0.00     | 0.00     | 0.00     | 0.00     |
| CE3        | 0.00     | 0.00     | 0.00     | 0.00     | 0.00     | 0.00     | 0.00     | 0.00     | 0.00     | 0.00     | 0.00    | 0.00     | 0.00     | 0.00     | 0.00     | 0.00     |
| PL10       | 0.19     | 0.05     | 0.05     | 0.13     | 0.10     | 0.05     | 0.08     | 0.12     | 0.07     | 0.11     | 0.17    | 0.11     | 0.16     | 0.05     | 0.09     | 0.10     |
| GT48       | 0.00     | 0.00     | 0.00     | 0.00     | 0.00     | 0.00     | 0.00     | 0.00     | 0.00     | 0.00     | 0.00    | 0.00     | 0.00     | 0.00     | 0.00     | 0.00     |
| PL6        | 0.00     | 0.00     | 0.00     | 0.00     | 0.01     | 0.00     | 0.00     | 0.00     | 0.00     | 0.00     | 0.00    | 0.00     | 0.00     | 0.00     | 0.00     | 0.00     |
| GT83       | 0.03     | 0.02     | 0.04     | 0.04     | 0.12     | 0.04     | 0.07     | 0.02     | 0.07     | 0.05     | 0.23    | 0.15     | 0.03     | 0.06     | 0.10     | 0.12     |
| GH126      | 0.00     | 0.00     | 0.00     | 0.00     | 0.00     | 0.00     | 0.00     | 0.00     | 0.00     | 0.00     | 0.00    | 0.00     | 0.00     | 0.00     | 0.00     | 0.00     |
| GH9        | 0.10     | 0.28     | 0.18     | 0.15     | 0.14     | 0.27     | 0.12     | 0.17     | 0.10     | 0.36     | 0.19    | 0.15     | 0.12     | 0.03     | 0.57     | 0.08     |
| GH75       | 0.00     | 0.00     | 0.00     | 0.00     | 0.00     | 0.00     | 0.00     | 0.00     | 0.00     | 0.00     | 0.00    | 0.00     | 0.00     | 0.00     | 0.00     | 0.00     |
| GT71       | 0.00     | 0.00     | 0.00     | 0.00     | 0.00     | 0.00     | 0.00     | 0.00     | 0.00     | 0.00     | 0.00    | 0.00     | 0.00     | 0.00     | 0.00     | 0.00     |
| GH46       | 0.00     | 0.00     | 0.00     | 0.00     | 0.00     | 0.00     | 0.00     | 0.00     | 0.00     | 0.00     | 0.00    | 0.00     | 0.00     | 0.00     | 0.00     | 0.00     |
| GT61       | 0.00     | 0.00     | 0.00     | 0.00     | 0.00     | 0.00     | 0.00     | 0.00     | 0.00     | 0.00     | 0.00    | 0.00     | 0.00     | 0.00     | 0.00     | 0.00     |
| GT3        | 0.16     | 0.09     | 0.13     | 0.11     | 0.25     | 0.14     | 0.23     | 0.13     | 0.21     | 0.13     | 0.35    | 0.24     | 0.09     | 0.10     | 0.22     | 0.14     |
| PL3        | 0.00     | 0.01     | 0.00     | 0.00     | 0.00     | 0.00     | 0.00     | 0.00     | 0.00     | 0.00     | 0.00    | 0.00     | 0.00     | 0.00     | 0.00     | 0.01     |
| GH108      | 0.02     | 0.03     | 0.03     | 0.04     | 0.04     | 0.04     | 0.04     | 0.03     | 0.06     | 0.03     | 0.10    | 0.05     | 0.03     | 0.00     | 0.03     | 0.01     |
| GT56       | 0.02     | 0.00     | 0.00     | 0.00     | 0.00     | 0.00     | 0.00     | 0.00     | 0.00     | 0.00     | 0.00    | 0.00     | 0.00     | 0.00     | 0.00     | 0.00     |
| PL11       | 0.14     | 0.06     | 0.08     | 0.07     | 0.17     | 0.13     | 0.16     | 0.10     | 0.05     | 0.13     | 0.31    | 0.12     | 0.08     | 0.10     | 0.12     | 0.11     |
| GH45       | 0.00     | 0.00     | 0.00     | 0.00     | 0.00     | 0.00     | 0.01     | 0.00     | 0.00     | 0.00     | 0.01    | 0.00     | 0.00     | 0.00     | 0.00     | 0.00     |
| GT34       | 0.00     | 0.00     | 0.00     | 0.00     | 0.00     | 0.00     | 0.00     | 0.00     | 0.01     | 0.00     | 0.00    | 0.01     | 0.00     | 0.00     | 0.00     | 0.00     |
| PL14       | 0.00     | 0.00     | 0.00     | 0.00     | 0.00     | 0.00     | 0.00     | 0.00     | 0.00     | 0.00     | 0.00    | 0.00     | 0.00     | 0.00     | 0.00     | 0.00     |
| GH19       | 0.00     | 0.01     | 0.01     | 0.00     | 0.00     | 0.03     | 0.01     | 0.00     | 0.00     | 0.00     | 0.01    | 0.00     | 0.01     | 0.01     | 0.04     | 0.00     |
| GH118      | 0.00     | 0.00     | 0.00     | 0.00     | 0.00     | 0.00     | 0.00     | 0.00     | 0.00     | 0.00     | 0.00    | 0.00     | 0.00     | 0.00     | 0.00     | 0.00     |
| GH82       | 0.00     | 0.00     | 0.00     | 0.00     | 0.00     | 0.00     | 0.00     | 0.00     | 0.00     | 0.00     | 0.00    | 0.00     | 0.00     | 0.00     | 0.00     | 0.00     |
| GH76       | 0.28     | 0.02     | 0.04     | 0.18     | 0.16     | 0.14     | 0.24     | 0.05     | 0.11     | 0.11     | 0.24    | 0.18     | 0.11     | 0.06     | 0.12     | 0.23     |
| GT4        | 1.93     | 1.65     | 1.88     | 1.67     | 1.77     | 1.67     | 1.74     | 1.51     | 1.50     | 1.92     | 2.72    | 1.70     | 1.94     | 1.42     | 1.88     | 1.75     |
| GT87       | 0.00     | 0.00     | 0.00     | 0.00     | 0.00     | 0.01     | 0.00     | 0.00     | 0.00     | 0.00     | 0.00    | 0.00     | 0.00     | 0.00     | 0.00     | 0.00     |
| GH24       | 0.03     | 0.09     | 0.04     | 0.17     | 0.04     | 0.06     | 0.13     | 0.09     | 0.12     | 0.06     | 0.31    | 0.10     | 0.16     | 0.05     | 0.12     | 0.10     |
| GH90       | 0.00     | 0.00     | 0.00     | 0.00     | 0.00     | 0.00     | 0.00     | 0.00     | 0.00     | 0.00     | 0.00    | 0.00     | 0.00     | 0.00     | 0.00     | 0.00     |
| GH57       | 0.10     | 0.07     | 0.13     | 0.04     | 0.16     | 0.09     | 0.11     | 0.12     | 0.17     | 0.14     | 0.20    | 0.18     | 0.14     | 0.07     | 0.12     | 0.11     |
| GH36       | 0.94     | 0.62     | 0.65     | 0.70     | 0.66     | 0.76     | 0.63     | 0.47     | 0.45     | 0.64     | 1.09    | 0.65     | 0.65     | 0.59     | 0.60     | 0.89     |
| GT46       | 0.00     | 0.00     | 0.00     | 0.00     | 0.00     | 0.00     | 0.00     | 0.00     | 0.00     | 0.00     | 0.00    | 0.00     | 0.00     | 0.00     | 0.00     | 0.00     |
| GH66       | 0.14     | 0.03     | 0.01     | 0.02     | 0.07     | 0.06     | 0.03     | 0.02     | 0.02     | 0.04     | 0.07    | 0.04     | 0.01     | 0.00     | 0.03     | 0.04     |

Normalized\_abundance\_2

| CAZY_group   | ES-AD-20 | ES-AD-21 | ES-AD-22 | ES-AD-23 | ES-AD-24 | ES-AD-25 | ES-AD-26 | ES-AD-27 | ES-AD-28 | ES-AD-29 | ES-AD-3 | ES-AD-30 | ES-AD-31 | ES-AD-32 | ES-AD-33 | ES-AD-34 |
|--------------|----------|----------|----------|----------|----------|----------|----------|----------|----------|----------|---------|----------|----------|----------|----------|----------|
| <b>GH48</b>  | 0.00     | 0.00     | 0.01     | 0.00     | 0.00     | 0.00     | 0.00     | 0.00     | 0.00     | 0.00     | 0.00    | 0.00     | 0.00     | 0.00     | 0.01     | 0.00     |
| <b>GT53</b>  | 0.00     | 0.00     | 0.00     | 0.00     | 0.00     | 0.00     | 0.00     | 0.00     | 0.00     | 0.00     | 0.00    | 0.00     | 0.00     | 0.00     | 0.00     | 0.00     |
| <b>GH60</b>  | 0.00     | 0.00     | 0.00     | 0.00     | 0.00     | 0.00     | 0.00     | 0.00     | 0.00     | 0.00     | 0.00    | 0.00     | 0.00     | 0.00     | 0.00     | 0.00     |
| <b>GT31</b>  | 0.00     | 0.00     | 0.00     | 0.00     | 0.00     | 0.00     | 0.00     | 0.00     | 0.00     | 0.00     | 0.00    | 0.00     | 0.00     | 0.00     | 0.00     | 0.00     |
| <b>GH105</b> | 0.70     | 0.34     | 0.35     | 0.35     | 0.56     | 0.31     | 0.56     | 0.35     | 0.25     | 0.50     | 0.84    | 0.54     | 0.26     | 0.20     | 0.36     | 0.65     |
| <b>GT23</b>  | 0.02     | 0.01     | 0.02     | 0.04     | 0.01     | 0.00     | 0.00     | 0.00     | 0.00     | 0.00     | 0.00    | 0.01     | 0.00     | 0.00     | 0.00     | 0.00     |
| <b>GH11</b>  | 0.00     | 0.01     | 0.01     | 0.00     | 0.01     | 0.01     | 0.00     | 0.00     | 0.00     | 0.01     | 0.00    | 0.00     | 0.00     | 0.01     | 0.00     | 0.00     |
| <b>GT38</b>  | 0.00     | 0.00     | 0.00     | 0.00     | 0.00     | 0.00     | 0.00     | 0.00     | 0.00     | 0.00     | 0.00    | 0.00     | 0.00     | 0.00     | 0.00     | 0.00     |
| <b>GT43</b>  | 0.00     | 0.00     | 0.00     | 0.00     | 0.00     | 0.00     | 0.00     | 0.00     | 0.00     | 0.00     | 0.00    | 0.00     | 0.00     | 0.00     | 0.00     | 0.00     |
| <b>GH99</b>  | 0.00     | 0.00     | 0.00     | 0.00     | 0.00     | 0.01     | 0.01     | 0.00     | 0.01     | 0.00     | 0.00    | 0.02     | 0.00     | 0.00     | 0.01     | 0.00     |
| <b>GH38</b>  | 0.37     | 0.12     | 0.27     | 0.31     | 0.28     | 0.15     | 0.36     | 0.16     | 0.15     | 0.23     | 0.53    | 0.23     | 0.24     | 0.24     | 0.14     | 0.35     |
| <b>GH109</b> | 0.21     | 0.16     | 0.18     | 0.11     | 0.35     | 0.16     | 0.31     | 0.23     | 0.30     | 0.21     | 0.47    | 0.37     | 0.11     | 0.14     | 0.27     | 0.18     |
| <b>GH2</b>   | 4.84     | 2.67     | 3.15     | 3.33     | 4.70     | 3.10     | 3.78     | 2.47     | 2.70     | 3.55     | 6.27    | 3.89     | 2.70     | 2.34     | 3.48     | 4.22     |
| <b>GT28</b>  | 0.50     | 0.43     | 0.48     | 0.37     | 0.45     | 0.42     | 0.32     | 0.41     | 0.33     | 0.41     | 0.43    | 0.45     | 0.45     | 0.44     | 0.43     | 0.42     |
| <b>GH42</b>  | 0.38     | 0.25     | 0.24     | 0.37     | 0.41     | 0.30     | 0.21     | 0.20     | 0.07     | 0.22     | 0.29    | 0.25     | 0.31     | 0.28     | 0.14     | 0.34     |
| <b>GT58</b>  | 0.00     | 0.00     | 0.00     | 0.00     | 0.00     | 0.00     | 0.00     | 0.00     | 0.00     | 0.00     | 0.00    | 0.00     | 0.00     | 0.00     | 0.00     | 0.00     |
| <b>GH61</b>  | 0.00     | 0.00     | 0.00     | 0.00     | 0.00     | 0.00     | 0.00     | 0.00     | 0.00     | 0.00     | 0.00    | 0.00     | 0.00     | 0.00     | 0.00     | 0.00     |
| <b>GH80</b>  | 0.00     | 0.00     | 0.00     | 0.00     | 0.00     | 0.00     | 0.00     | 0.00     | 0.00     | 0.00     | 0.00    | 0.00     | 0.00     | 0.00     | 0.00     | 0.00     |
| <b>GH98</b>  | 0.00     | 0.01     | 0.00     | 0.00     | 0.00     | 0.00     | 0.00     | 0.01     | 0.00     | 0.00     | 0.00    | 0.00     | 0.00     | 0.00     | 0.00     | 0.00     |
| <b>GH6</b>   | 0.00     | 0.00     | 0.00     | 0.00     | 0.00     | 0.00     | 0.00     | 0.00     | 0.00     | 0.00     | 0.01    | 0.00     | 0.00     | 0.00     | 0.00     | 0.00     |
| <b>GT1</b>   | 0.10     | 0.03     | 0.04     | 0.04     | 0.08     | 0.06     | 0.03     | 0.05     | 0.04     | 0.05     | 0.06    | 0.02     | 0.03     | 0.06     | 0.01     | 0.02     |
| <b>GH28</b>  | 0.78     | 0.45     | 0.56     | 0.72     | 1.05     | 0.51     | 1.04     | 0.54     | 0.38     | 0.80     | 1.20    | 0.60     | 0.62     | 0.47     | 0.73     | 0.73     |
| <b>GT42</b>  | 0.00     | 0.00     | 0.00     | 0.00     | 0.00     | 0.00     | 0.00     | 0.00     | 0.00     | 0.00     | 0.00    | 0.00     | 0.00     | 0.00     | 0.00     | 0.00     |
| <b>GH128</b> | 0.00     | 0.00     | 0.00     | 0.00     | 0.00     | 0.00     | 0.00     | 0.00     | 0.00     | 0.00     | 0.00    | 0.00     | 0.00     | 0.00     | 0.00     | 0.00     |
| <b>CE12</b>  | 0.12     | 0.13     | 0.10     | 0.06     | 0.14     | 0.08     | 0.11     | 0.09     | 0.09     | 0.18     | 0.12    | 0.10     | 0.07     | 0.08     | 0.12     | 0.14     |
| <b>CE16</b>  | 0.00     | 0.00     | 0.00     | 0.00     | 0.00     | 0.00     | 0.00     | 0.00     | 0.00     | 0.00     | 0.00    | 0.00     | 0.00     | 0.00     | 0.00     | 0.00     |
| <b>GT89</b>  | 0.00     | 0.00     | 0.00     | 0.00     | 0.00     | 0.00     | 0.00     | 0.00     | 0.00     | 0.00     | 0.00    | 0.00     | 0.00     | 0.00     | 0.00     | 0.00     |
| <b>GT11</b>  | 0.05     | 0.06     | 0.05     | 0.07     | 0.07     | 0.02     | 0.08     | 0.03     | 0.05     | 0.02     | 0.08    | 0.09     | 0.04     | 0.01     | 0.03     | 0.04     |
| <b>GT77</b>  | 0.02     | 0.00     | 0.00     | 0.00     | 0.00     | 0.00     | 0.00     | 0.00     | 0.00     | 0.00     | 0.00    | 0.00     | 0.00     | 0.01     | 0.00     | 0.00     |
| <b>GT55</b>  | 0.00     | 0.00     | 0.00     | 0.00     | 0.00     | 0.00     | 0.00     | 0.00     | 0.00     | 0.00     | 0.00    | 0.00     | 0.00     | 0.00     | 0.00     | 0.00     |
| <b>GT18</b>  | 0.00     | 0.00     | 0.00     | 0.00     | 0.00     | 0.00     | 0.00     | 0.00     | 0.00     | 0.00     | 0.00    | 0.00     | 0.00     | 0.00     | 0.00     | 0.00     |
| <b>GH87</b>  | 0.03     | 0.00     | 0.00     | 0.00     | 0.00     | 0.00     | 0.00     | 0.02     | 0.00     | 0.00     | 0.00    | 0.00     | 0.01     | 0.00     | 0.01     | 0.01     |
| <b>PL5</b>   | 0.00     | 0.00     | 0.00     | 0.00     | 0.00     | 0.00     | 0.00     | 0.00     | 0.00     | 0.00     | 0.00    | 0.00     | 0.00     | 0.00     | 0.00     | 0.00     |
| <b>GH22</b>  | 0.00     | 0.00     | 0.00     | 0.00     | 0.00     | 0.00     | 0.00     | 0.00     | 0.00     | 0.00     | 0.00    | 0.00     | 0.00     | 0.00     | 0.00     | 0.00     |
| <b>CE2</b>   | 0.09     | 0.10     | 0.10     | 0.04     | 0.03     | 0.08     | 0.07     | 0.04     | 0.07     | 0.07     | 0.06    | 0.07     | 0.03     | 0.09     | 0.04     | 0.05     |
| <b>GH120</b> | 0.03     | 0.10     | 0.07     | 0.11     | 0.12     | 0.07     | 0.04     | 0.06     | 0.00     | 0.06     | 0.06    | 0.11     | 0.08     | 0.11     | 0.01     | 0.09     |
| <b>GH73</b>  | 0.73     | 0.50     | 0.48     | 0.33     | 0.52     | 0.42     | 0.36     | 0.33     | 0.28     | 0.43     | 0.79    | 0.58     | 0.43     | 0.45     | 0.48     | 0.34     |
| <b>GT17</b>  | 0.00     | 0.01     | 0.00     | 0.00     | 0.00     | 0.00     | 0.00     | 0.00     | 0.00     | 0.00     | 0.00    | 0.01     | 0.00     | 0.00     | 0.00     | 0.00     |
| <b>GH124</b> | 0.00     | 0.00     | 0.00     | 0.00     | 0.00     | 0.00     | 0.00     | 0.00     | 0.00     | 0.00     | 0.00    | 0.00     | 0.00     | 0.00     | 0.00     | 0.00     |
| <b>GH54</b>  | 0.00     | 0.00     | 0.00     | 0.00     | 0.00     | 0.00     | 0.00     | 0.00     | 0.00     | 0.00     | 0.00    | 0.00     | 0.00     | 0.00     | 0.00     | 0.00     |
| <b>GH100</b> | 0.00     | 0.00     | 0.00     | 0.00     | 0.00     | 0.00     | 0.00     | 0.00     | 0.00     | 0.00     | 0.00    | 0.00     | 0.00     | 0.00     | 0.00     | 0.00     |
| <b>GH113</b> | 0.00     | 0.05     | 0.03     | 0.02     | 0.03     | 0.07     | 0.04     | 0.01     | 0.01     | 0.01     | 0.04    | 0.00     | 0.04     | 0.02     | 0.01     | 0.01     |
| <b>GT5</b>   | 0.44     | 0.55     | 0.43     | 0.35     | 0.39     | 0.48     | 0.47     | 0.51     | 0.37     | 0.40     | 0.48    | 0.35     | 0.46     | 0.47     | 0.40     | 0.39     |
| <b>GH94</b>  | 0.12     | 0.66     | 0.42     | 0.35     | 0.39     | 0.58     | 0.24     | 0.36     | 0.12     | 0.47     | 0.42    | 0.20     | 0.38     | 0.42     | 0.36     | 0.36     |
| <b>GT66</b>  | 0.00     | 0.00     | 0.01     | 0.00     | 0.00     | 0.00     | 0.00     | 0.02     | 0.01     | 0.00     | 0.00    | 0.00     | 0.00     | 0.00     | 0.00     | 0.00     |
| <b>GT94</b>  | 0.00     | 0.00     | 0.00     | 0.00     | 0.00     | 0.00     | 0.00     | 0.00     | 0.00     | 0.00     | 0.00    | 0.00     | 0.00     | 0.00     | 0.00     | 0.00     |
| <b>GH58</b>  | 0.00     | 0.00     | 0.00     | 0.00     | 0.00     | 0.00     | 0.00     | 0.00     | 0.00     | 0.00     | 0.00    | 0.00     | 0.00     | 0.00     | 0.00     | 0.00     |
| <b>GH1</b>   | 0.78     | 0.53     | 0.27     | 0.64     | 0.47     | 0.46     | 0.60     | 0.35     | 0.13     | 0.36     | 0.68    | 0.23     | 0.84     | 0.55     | 0.29     | 0.55     |
| <b>PL22</b>  | 0.02     | 0.00     | 0.00     | 0.00     | 0.00     | 0.00     | 0.00     | 0.00     | 0.00     | 0.00     | 0.00    | 0.00     | 0.00     | 0.00     | 0.00     | 0.00     |
| <b>GT9</b>   | 0.10     | 0.07     | 0.10     | 0.04     | 0.12     | 0.05     | 0.15     | 0.06     | 0.11     | 0.08     | 0.25    | 0.12     | 0.08     | 0.05     | 0.22     | 0.13     |



Normalized\_abundance\_2

| CAZY_group | ES-AD-20 | ES-AD-21 | ES-AD-22 | ES-AD-23 | ES-AD-24 | ES-AD-25 | ES-AD-26 | ES-AD-27 | ES-AD-28 | ES-AD-29 | ES-AD-3 | ES-AD-30 | ES-AD-31 | ES-AD-32 | ES-AD-33 | ES-AD-34 |
|------------|----------|----------|----------|----------|----------|----------|----------|----------|----------|----------|---------|----------|----------|----------|----------|----------|
| GT76       | 0.00     | 0.00     | 0.00     | 0.00     | 0.00     | 0.00     | 0.00     | 0.00     | 0.00     | 0.00     | 0.00    | 0.00     | 0.00     | 0.00     | 0.00     | 0.00     |
| GT32       | 0.05     | 0.08     | 0.08     | 0.09     | 0.04     | 0.10     | 0.04     | 0.11     | 0.08     | 0.13     | 0.12    | 0.03     | 0.08     | 0.06     | 0.05     | 0.09     |
| GT47       | 0.02     | 0.03     | 0.06     | 0.04     | 0.09     | 0.05     | 0.03     | 0.09     | 0.01     | 0.05     | 0.04    | 0.05     | 0.06     | 0.02     | 0.04     | 0.07     |
| GH84       | 0.07     | 0.06     | 0.13     | 0.17     | 0.16     | 0.07     | 0.13     | 0.06     | 0.12     | 0.12     | 0.31    | 0.14     | 0.08     | 0.13     | 0.12     | 0.10     |
| GH83       | 0.00     | 0.00     | 0.00     | 0.00     | 0.00     | 0.00     | 0.00     | 0.00     | 0.00     | 0.00     | 0.00    | 0.00     | 0.00     | 0.00     | 0.00     | 0.00     |
| GT59       | 0.00     | 0.00     | 0.00     | 0.00     | 0.00     | 0.00     | 0.00     | 0.00     | 0.00     | 0.00     | 0.00    | 0.00     | 0.00     | 0.00     | 0.00     | 0.00     |
| GH34       | 0.00     | 0.00     | 0.00     | 0.00     | 0.00     | 0.00     | 0.00     | 0.00     | 0.00     | 0.00     | 0.00    | 0.00     | 0.00     | 0.00     | 0.00     | 0.00     |
| GT14       | 0.03     | 0.02     | 0.03     | 0.07     | 0.03     | 0.03     | 0.04     | 0.01     | 0.03     | 0.03     | 0.04    | 0.05     | 0.02     | 0.00     | 0.03     | 0.04     |
| GH47       | 0.00     | 0.00     | 0.00     | 0.00     | 0.00     | 0.00     | 0.00     | 0.00     | 0.00     | 0.00     | 0.00    | 0.00     | 0.00     | 0.00     | 0.00     | 0.00     |
| GH97       | 0.82     | 0.38     | 0.52     | 0.57     | 0.81     | 0.44     | 0.94     | 0.32     | 0.56     | 0.69     | 1.37    | 0.96     | 0.47     | 0.36     | 0.96     | 0.82     |
| GH50       | 0.00     | 0.00     | 0.01     | 0.00     | 0.08     | 0.01     | 0.03     | 0.00     | 0.02     | 0.02     | 0.05    | 0.01     | 0.00     | 0.00     | 0.00     | 0.01     |
| GT26       | 0.10     | 0.20     | 0.22     | 0.11     | 0.31     | 0.12     | 0.19     | 0.21     | 0.06     | 0.20     | 0.23    | 0.20     | 0.17     | 0.20     | 0.13     | 0.15     |
| GH18       | 0.77     | 0.41     | 0.44     | 0.66     | 0.58     | 0.58     | 0.75     | 0.55     | 0.50     | 0.53     | 0.64    | 0.56     | 0.47     | 0.38     | 0.44     | 0.50     |
| GH37       | 0.03     | 0.00     | 0.00     | 0.00     | 0.01     | 0.00     | 0.00     | 0.01     | 0.02     | 0.00     | 0.00    | 0.01     | 0.00     | 0.01     | 0.00     | 0.00     |
| PL13       | 0.05     | 0.02     | 0.01     | 0.00     | 0.04     | 0.02     | 0.05     | 0.02     | 0.02     | 0.01     | 0.01    | 0.10     | 0.01     | 0.01     | 0.01     | 0.07     |
| GH27       | 0.21     | 0.18     | 0.18     | 0.18     | 0.21     | 0.21     | 0.21     | 0.14     | 0.23     | 0.23     | 0.25    | 0.32     | 0.19     | 0.17     | 0.26     | 0.24     |
| GT54       | 0.00     | 0.00     | 0.00     | 0.00     | 0.00     | 0.00     | 0.00     | 0.00     | 0.00     | 0.00     | 0.00    | 0.00     | 0.00     | 0.00     | 0.00     | 0.00     |
| GT91       | 0.00     | 0.00     | 0.00     | 0.00     | 0.00     | 0.00     | 0.00     | 0.00     | 0.00     | 0.00     | 0.00    | 0.00     | 0.00     | 0.00     | 0.00     | 0.00     |
| GT72       | 0.00     | 0.00     | 0.00     | 0.00     | 0.00     | 0.00     | 0.00     | 0.00     | 0.00     | 0.00     | 0.00    | 0.00     | 0.00     | 0.00     | 0.00     | 0.00     |
| GH67       | 0.10     | 0.03     | 0.03     | 0.06     | 0.13     | 0.02     | 0.08     | 0.04     | 0.02     | 0.06     | 0.07    | 0.07     | 0.03     | 0.04     | 0.07     | 0.04     |
| GH12       | 0.00     | 0.00     | 0.00     | 0.00     | 0.00     | 0.00     | 0.00     | 0.00     | 0.00     | 0.00     | 0.00    | 0.00     | 0.00     | 0.00     | 0.00     | 0.00     |
| GH91       | 0.05     | 0.00     | 0.01     | 0.00     | 0.03     | 0.04     | 0.01     | 0.00     | 0.02     | 0.00     | 0.04    | 0.03     | 0.01     | 0.01     | 0.03     | 0.00     |
| GT69       | 0.00     | 0.00     | 0.00     | 0.00     | 0.00     | 0.00     | 0.00     | 0.00     | 0.00     | 0.00     | 0.00    | 0.00     | 0.00     | 0.00     | 0.00     | 0.00     |
| GH106      | 0.30     | 0.09     | 0.14     | 0.17     | 0.34     | 0.13     | 0.32     | 0.12     | 0.18     | 0.19     | 0.43    | 0.30     | 0.17     | 0.08     | 0.25     | 0.25     |
| GT62       | 0.00     | 0.00     | 0.00     | 0.00     | 0.00     | 0.00     | 0.00     | 0.00     | 0.00     | 0.00     | 0.00    | 0.00     | 0.00     | 0.00     | 0.00     | 0.00     |
| GH17       | 0.00     | 0.00     | 0.00     | 0.00     | 0.00     | 0.00     | 0.00     | 0.00     | 0.00     | 0.00     | 0.00    | 0.00     | 0.00     | 0.00     | 0.00     | 0.00     |
| GH88       | 0.45     | 0.13     | 0.18     | 0.18     | 0.43     | 0.23     | 0.52     | 0.15     | 0.23     | 0.37     | 0.50    | 0.41     | 0.18     | 0.11     | 0.22     | 0.28     |
| CE5        | 0.00     | 0.00     | 0.00     | 0.00     | 0.00     | 0.00     | 0.00     | 0.00     | 0.00     | 0.00     | 0.00    | 0.00     | 0.00     | 0.00     | 0.00     | 0.00     |
| GT8        | 0.19     | 0.14     | 0.08     | 0.11     | 0.10     | 0.02     | 0.12     | 0.08     | 0.08     | 0.07     | 0.11    | 0.19     | 0.16     | 0.09     | 0.08     | 0.11     |
| GT50       | 0.00     | 0.00     | 0.00     | 0.00     | 0.00     | 0.00     | 0.00     | 0.00     | 0.00     | 0.00     | 0.00    | 0.00     | 0.00     | 0.00     | 0.00     | 0.00     |
| GT20       | 0.07     | 0.02     | 0.04     | 0.09     | 0.08     | 0.06     | 0.15     | 0.05     | 0.09     | 0.09     | 0.18    | 0.12     | 0.04     | 0.03     | 0.07     | 0.05     |
| PL9        | 0.05     | 0.10     | 0.05     | 0.09     | 0.05     | 0.10     | 0.08     | 0.04     | 0.04     | 0.14     | 0.08    | 0.08     | 0.08     | 0.05     | 0.03     | 0.11     |
| GH55       | 0.00     | 0.07     | 0.01     | 0.04     | 0.01     | 0.01     | 0.01     | 0.02     | 0.02     | 0.01     | 0.06    | 0.04     | 0.06     | 0.01     | 0.05     | 0.01     |
| GH64       | 0.00     | 0.00     | 0.00     | 0.00     | 0.00     | 0.00     | 0.00     | 0.00     | 0.00     | 0.00     | 0.00    | 0.00     | 0.00     | 0.00     | 0.00     | 0.00     |
| GH127      | 0.40     | 0.27     | 0.37     | 0.26     | 0.31     | 0.27     | 0.32     | 0.18     | 0.15     | 0.26     | 0.40    | 0.31     | 0.33     | 0.26     | 0.26     | 0.33     |
| GH103      | 0.02     | 0.00     | 0.00     | 0.00     | 0.00     | 0.00     | 0.00     | 0.00     | 0.00     | 0.00     | 0.00    | 0.01     | 0.00     | 0.01     | 0.00     | 0.00     |
| GH3        | 2.30     | 2.42     | 2.39     | 2.52     | 2.78     | 2.00     | 2.61     | 2.08     | 1.45     | 2.67     | 3.86    | 2.63     | 2.45     | 1.80     | 2.03     | 2.69     |
| GT45       | 0.00     | 0.00     | 0.00     | 0.00     | 0.00     | 0.00     | 0.00     | 0.00     | 0.00     | 0.00     | 0.00    | 0.00     | 0.00     | 0.00     | 0.00     | 0.00     |
| GT74       | 0.00     | 0.00     | 0.00     | 0.00     | 0.00     | 0.00     | 0.00     | 0.00     | 0.00     | 0.00     | 0.00    | 0.00     | 0.00     | 0.00     | 0.00     | 0.00     |
| GT90       | 0.00     | 0.00     | 0.00     | 0.00     | 0.00     | 0.01     | 0.00     | 0.00     | 0.00     | 0.00     | 0.01    | 0.00     | 0.00     | 0.00     | 0.00     | 0.00     |
| GH116      | 0.02     | 0.07     | 0.05     | 0.06     | 0.07     | 0.07     | 0.04     | 0.06     | 0.06     | 0.04     | 0.14    | 0.04     | 0.04     | 0.00     | 0.08     | 0.08     |
| GH31       | 1.01     | 0.78     | 0.96     | 1.12     | 1.04     | 0.79     | 0.91     | 0.76     | 0.60     | 0.97     | 1.19    | 1.10     | 1.02     | 0.90     | 0.85     | 1.19     |
| GT12       | 0.00     | 0.00     | 0.00     | 0.00     | 0.00     | 0.00     | 0.00     | 0.00     | 0.00     | 0.00     | 0.00    | 0.00     | 0.00     | 0.00     | 0.00     | 0.00     |
| CE1        | 0.44     | 0.32     | 0.43     | 0.35     | 0.45     | 0.36     | 0.35     | 0.31     | 0.35     | 0.30     | 0.46    | 0.33     | 0.45     | 0.27     | 0.33     | 0.36     |
| GH121      | 0.00     | 0.00     | 0.00     | 0.09     | 0.04     | 0.00     | 0.00     | 0.00     | 0.00     | 0.01     | 0.02    | 0.00     | 0.04     | 0.02     | 0.00     | 0.09     |
| GH79       | 0.00     | 0.02     | 0.00     | 0.02     | 0.00     | 0.00     | 0.00     | 0.01     | 0.00     | 0.00     | 0.00    | 0.00     | 0.00     | 0.01     | 0.00     | 0.00     |
| GT73       | 0.00     | 0.00     | 0.00     | 0.00     | 0.00     | 0.00     | 0.00     | 0.00     | 0.00     | 0.00     | 0.00    | 0.00     | 0.00     | 0.00     | 0.00     | 0.00     |
| GH77       | 0.56     | 0.67     | 0.55     | 0.64     | 0.56     | 0.63     | 0.63     | 0.59     | 0.46     | 0.62     | 0.92    | 0.48     | 0.65     | 0.62     | 0.55     | 0.74     |
| PL17       | 0.00     | 0.02     | 0.00     | 0.00     | 0.00     | 0.00     | 0.00     | 0.00     | 0.00     | 0.00     | 0.00    | 0.02     | 0.02     | 0.00     | 0.00     | 0.00     |
| PL8        | 0.14     | 0.07     | 0.12     | 0.15     | 0.31     | 0.19     | 0.27     | 0.05     | 0.25     | 0.17     | 0.29    | 0.41     | 0.10     | 0.05     | 0.31     | 0.23     |

Normalized\_abundance\_2

| CAZY_group | ES-AD-20 | ES-AD-21 | ES-AD-22 | ES-AD-23 | ES-AD-24 | ES-AD-25 | ES-AD-26 | ES-AD-27 | ES-AD-28 | ES-AD-29 | ES-AD-3 | ES-AD-30 | ES-AD-31 | ES-AD-32 | ES-AD-33 | ES-AD-34 |
|------------|----------|----------|----------|----------|----------|----------|----------|----------|----------|----------|---------|----------|----------|----------|----------|----------|
| CE9        | 0.52     | 0.31     | 0.33     | 0.42     | 0.41     | 0.33     | 0.43     | 0.30     | 0.12     | 0.30     | 0.60    | 0.35     | 0.28     | 0.27     | 0.27     | 0.48     |
| CE15       | 0.00     | 0.00     | 0.00     | 0.00     | 0.00     | 0.00     | 0.01     | 0.01     | 0.01     | 0.01     | 0.02    | 0.03     | 0.00     | 0.00     | 0.01     | 0.00     |
| GT79       | 0.00     | 0.00     | 0.00     | 0.00     | 0.00     | 0.00     | 0.00     | 0.00     | 0.00     | 0.00     | 0.00    | 0.00     | 0.00     | 0.00     | 0.00     | 0.00     |
| GT10       | 0.00     | 0.00     | 0.01     | 0.00     | 0.00     | 0.00     | 0.01     | 0.00     | 0.00     | 0.02     | 0.00    | 0.00     | 0.00     | 0.02     | 0.00     | 0.00     |
| GH119      | 0.00     | 0.00     | 0.00     | 0.00     | 0.00     | 0.00     | 0.00     | 0.00     | 0.00     | 0.00     | 0.00    | 0.00     | 0.00     | 0.00     | 0.00     | 0.00     |
| GH16       | 0.14     | 0.08     | 0.12     | 0.13     | 0.18     | 0.13     | 0.17     | 0.12     | 0.22     | 0.16     | 0.34    | 0.25     | 0.12     | 0.11     | 0.30     | 0.12     |
| GH43       | 2.44     | 1.10     | 1.50     | 1.95     | 2.56     | 1.57     | 2.14     | 1.16     | 1.22     | 1.71     | 2.68    | 2.04     | 1.68     | 1.19     | 1.97     | 2.06     |
| GH51       | 0.57     | 0.36     | 0.56     | 0.63     | 0.64     | 0.42     | 0.48     | 0.31     | 0.32     | 0.43     | 0.70    | 0.55     | 0.44     | 0.56     | 0.51     | 0.66     |
| GT35       | 0.71     | 1.09     | 1.13     | 0.81     | 0.84     | 0.89     | 0.86     | 0.86     | 0.46     | 0.95     | 1.49    | 0.56     | 0.80     | 0.88     | 1.02     | 0.70     |
| GT25       | 0.00     | 0.00     | 0.01     | 0.00     | 0.00     | 0.00     | 0.00     | 0.00     | 0.00     | 0.00     | 0.00    | 0.01     | 0.00     | 0.00     | 0.01     | 0.00     |
| GT2        | 3.85     | 3.77     | 3.96     | 4.16     | 3.81     | 3.86     | 4.55     | 3.48     | 3.28     | 4.31     | 7.37    | 4.08     | 4.20     | 3.69     | 3.63     | 4.23     |
| GT51       | 0.97     | 0.72     | 0.75     | 1.03     | 0.80     | 0.87     | 0.91     | 0.63     | 0.70     | 0.74     | 1.21    | 0.98     | 0.80     | 0.76     | 0.89     | 0.91     |
| GH107      | 0.00     | 0.00     | 0.00     | 0.00     | 0.00     | 0.00     | 0.00     | 0.00     | 0.00     | 0.00     | 0.00    | 0.00     | 0.00     | 0.00     | 0.00     | 0.00     |
| GH7        | 0.00     | 0.00     | 0.00     | 0.00     | 0.00     | 0.00     | 0.00     | 0.00     | 0.00     | 0.00     | 0.00    | 0.00     | 0.00     | 0.00     | 0.00     | 0.00     |
| GT7        | 0.00     | 0.00     | 0.00     | 0.00     | 0.00     | 0.00     | 0.00     | 0.00     | 0.00     | 0.00     | 0.00    | 0.00     | 0.00     | 0.00     | 0.00     | 0.00     |
| GT36       | 0.00     | 0.00     | 0.00     | 0.00     | 0.00     | 0.00     | 0.00     | 0.00     | 0.00     | 0.00     | 0.00    | 0.00     | 0.00     | 0.00     | 0.00     | 0.00     |
| PL7        | 0.02     | 0.00     | 0.00     | 0.00     | 0.00     | 0.00     | 0.00     | 0.00     | 0.00     | 0.00     | 0.00    | 0.00     | 0.00     | 0.00     | 0.00     | 0.00     |
| GH110      | 0.05     | 0.04     | 0.12     | 0.07     | 0.14     | 0.04     | 0.11     | 0.08     | 0.10     | 0.09     | 0.11    | 0.14     | 0.06     | 0.08     | 0.14     | 0.12     |
| GT21       | 0.00     | 0.00     | 0.00     | 0.00     | 0.00     | 0.00     | 0.00     | 0.00     | 0.00     | 0.00     | 0.00    | 0.00     | 0.00     | 0.00     | 0.00     | 0.00     |
| GH62       | 0.00     | 0.00     | 0.00     | 0.00     | 0.00     | 0.00     | 0.00     | 0.00     | 0.00     | 0.00     | 0.00    | 0.00     | 0.00     | 0.00     | 0.00     | 0.00     |
| GH125      | 0.21     | 0.08     | 0.08     | 0.18     | 0.14     | 0.10     | 0.21     | 0.12     | 0.06     | 0.18     | 0.25    | 0.23     | 0.14     | 0.09     | 0.16     | 0.21     |
| GH117      | 0.09     | 0.04     | 0.06     | 0.11     | 0.10     | 0.05     | 0.08     | 0.04     | 0.08     | 0.08     | 0.13    | 0.11     | 0.03     | 0.03     | 0.09     | 0.07     |
| GH68       | 0.03     | 0.00     | 0.00     | 0.00     | 0.00     | 0.00     | 0.00     | 0.00     | 0.00     | 0.00     | 0.00    | 0.00     | 0.00     | 0.00     | 0.00     | 0.00     |
| GH85       | 0.05     | 0.00     | 0.03     | 0.07     | 0.01     | 0.00     | 0.00     | 0.00     | 0.01     | 0.00     | 0.06    | 0.00     | 0.03     | 0.03     | 0.00     | 0.03     |
| GH92       | 2.09     | 0.64     | 0.72     | 1.21     | 1.93     | 0.86     | 1.85     | 0.70     | 1.10     | 1.45     | 2.23    | 1.45     | 1.01     | 0.76     | 1.16     | 1.82     |
| GH40       | 0.00     | 0.00     | 0.00     | 0.00     | 0.00     | 0.00     | 0.00     | 0.00     | 0.00     | 0.00     | 0.00    | 0.00     | 0.00     | 0.00     | 0.00     | 0.00     |
| GT49       | 0.00     | 0.00     | 0.00     | 0.00     | 0.00     | 0.00     | 0.00     | 0.00     | 0.00     | 0.00     | 0.00    | 0.00     | 0.00     | 0.00     | 0.00     | 0.00     |
| GH112      | 0.40     | 0.16     | 0.22     | 0.33     | 0.17     | 0.18     | 0.20     | 0.13     | 0.05     | 0.13     | 0.36    | 0.11     | 0.14     | 0.23     | 0.13     | 0.21     |
| GT67       | 0.00     | 0.00     | 0.00     | 0.00     | 0.00     | 0.00     | 0.00     | 0.00     | 0.00     | 0.00     | 0.00    | 0.00     | 0.00     | 0.00     | 0.00     | 0.00     |
| CE8        | 0.12     | 0.18     | 0.11     | 0.28     | 0.16     | 0.15     | 0.28     | 0.16     | 0.11     | 0.23     | 0.25    | 0.13     | 0.20     | 0.14     | 0.25     | 0.26     |
| GT86       | 0.00     | 0.00     | 0.00     | 0.00     | 0.00     | 0.00     | 0.00     | 0.00     | 0.00     | 0.00     | 0.00    | 0.00     | 0.00     | 0.00     | 0.00     | 0.00     |
| GH101      | 0.07     | 0.00     | 0.02     | 0.07     | 0.01     | 0.01     | 0.01     | 0.00     | 0.01     | 0.04     | 0.02    | 0.00     | 0.04     | 0.06     | 0.03     | 0.03     |
| GH81       | 0.00     | 0.00     | 0.00     | 0.00     | 0.00     | 0.01     | 0.00     | 0.00     | 0.00     | 0.00     | 0.00    | 0.00     | 0.00     | 0.04     | 0.00     | 0.00     |
| GT93       | 0.00     | 0.00     | 0.00     | 0.00     | 0.00     | 0.00     | 0.00     | 0.00     | 0.00     | 0.00     | 0.00    | 0.00     | 0.00     | 0.00     | 0.00     | 0.00     |
| GT63       | 0.00     | 0.00     | 0.00     | 0.00     | 0.00     | 0.00     | 0.00     | 0.00     | 0.00     | 0.00     | 0.00    | 0.00     | 0.00     | 0.00     | 0.00     | 0.00     |
| CE11       | 0.24     | 0.15     | 0.24     | 0.15     | 0.25     | 0.16     | 0.29     | 0.18     | 0.28     | 0.17     | 0.29    | 0.21     | 0.20     | 0.16     | 0.27     | 0.21     |
| GT19       | 0.12     | 0.07     | 0.12     | 0.09     | 0.14     | 0.07     | 0.19     | 0.12     | 0.11     | 0.12     | 0.24    | 0.19     | 0.12     | 0.06     | 0.16     | 0.13     |
| GT33       | 0.00     | 0.00     | 0.00     | 0.00     | 0.00     | 0.00     | 0.00     | 0.00     | 0.00     | 0.00     | 0.00    | 0.00     | 0.00     | 0.00     | 0.00     | 0.00     |
| GH21       | 0.00     | 0.00     | 0.00     | 0.00     | 0.00     | 0.00     | 0.00     | 0.00     | 0.00     | 0.00     | 0.00    | 0.00     | 0.00     | 0.00     | 0.00     | 0.00     |
| GT68       | 0.00     | 0.00     | 0.00     | 0.00     | 0.00     | 0.00     | 0.00     | 0.00     | 0.00     | 0.00     | 0.00    | 0.00     | 0.00     | 0.00     | 0.00     | 0.00     |
| GH89       | 0.26     | 0.09     | 0.12     | 0.07     | 0.31     | 0.18     | 0.27     | 0.09     | 0.19     | 0.19     | 0.25    | 0.21     | 0.11     | 0.10     | 0.26     | 0.18     |
| GT82       | 0.00     | 0.00     | 0.00     | 0.00     | 0.00     | 0.00     | 0.00     | 0.00     | 0.00     | 0.00     | 0.00    | 0.00     | 0.00     | 0.00     | 0.00     | 0.00     |
| GH30       | 0.31     | 0.13     | 0.17     | 0.28     | 0.24     | 0.15     | 0.19     | 0.11     | 0.20     | 0.16     | 0.18    | 0.24     | 0.16     | 0.11     | 0.21     | 0.32     |
| GH20       | 0.89     | 0.54     | 0.98     | 0.81     | 1.43     | 0.75     | 1.43     | 0.79     | 0.98     | 1.01     | 1.79    | 1.32     | 0.69     | 0.58     | 0.96     | 1.19     |
| GH52       | 0.00     | 0.00     | 0.00     | 0.00     | 0.00     | 0.00     | 0.00     | 0.00     | 0.00     | 0.00     | 0.00    | 0.00     | 0.00     | 0.00     | 0.00     | 0.00     |
| GT84       | 0.00     | 0.01     | 0.05     | 0.00     | 0.00     | 0.02     | 0.00     | 0.04     | 0.01     | 0.04     | 0.00    | 0.00     | 0.06     | 0.01     | 0.00     | 0.00     |
| GT15       | 0.00     | 0.00     | 0.00     | 0.00     | 0.00     | 0.00     | 0.00     | 0.00     | 0.00     | 0.00     | 0.00    | 0.00     | 0.00     | 0.00     | 0.00     | 0.00     |
| GH93       | 0.02     | 0.00     | 0.00     | 0.00     | 0.00     | 0.02     | 0.03     | 0.00     | 0.00     | 0.00     | 0.00    | 0.02     | 0.02     | 0.00     | 0.00     | 0.00     |
| PL16       | 0.00     | 0.00     | 0.00     | 0.00     | 0.00     | 0.00     | 0.00     | 0.00     | 0.00     | 0.00     | 0.00    | 0.00     | 0.00     | 0.00     | 0.00     | 0.00     |
| GH26       | 0.16     | 0.11     | 0.17     | 0.15     | 0.12     | 0.22     | 0.09     | 0.06     | 0.10     | 0.18     | 0.11    | 0.11     | 0.16     | 0.08     | 0.23     | 0.08     |

Normalized\_abundance\_2

| CAZY_group | ES-AD-20 | ES-AD-21 | ES-AD-22 | ES-AD-23 | ES-AD-24 | ES-AD-25 | ES-AD-26 | ES-AD-27 | ES-AD-28 | ES-AD-29 | ES-AD-3 | ES-AD-30 | ES-AD-31 | ES-AD-32 | ES-AD-33 | ES-AD-34 |
|------------|----------|----------|----------|----------|----------|----------|----------|----------|----------|----------|---------|----------|----------|----------|----------|----------|
| GT75       | 0.00     | 0.00     | 0.00     | 0.00     | 0.00     | 0.00     | 0.00     | 0.00     | 0.00     | 0.00     | 0.00    | 0.00     | 0.00     | 0.00     | 0.00     | 0.00     |
| GH53       | 0.05     | 0.18     | 0.12     | 0.22     | 0.10     | 0.19     | 0.04     | 0.11     | 0.02     | 0.16     | 0.08    | 0.05     | 0.22     | 0.08     | 0.13     | 0.12     |
| GT88       | 0.00     | 0.00     | 0.00     | 0.00     | 0.00     | 0.00     | 0.00     | 0.00     | 0.00     | 0.00     | 0.00    | 0.00     | 0.00     | 0.00     | 0.00     | 0.00     |
| GT24       | 0.00     | 0.00     | 0.00     | 0.00     | 0.00     | 0.00     | 0.00     | 0.00     | 0.00     | 0.00     | 0.00    | 0.00     | 0.00     | 0.00     | 0.00     | 0.00     |
| GT81       | 0.00     | 0.00     | 0.00     | 0.00     | 0.00     | 0.00     | 0.00     | 0.00     | 0.00     | 0.00     | 0.00    | 0.00     | 0.00     | 0.00     | 0.00     | 0.00     |
| GH4        | 0.21     | 0.10     | 0.09     | 0.06     | 0.13     | 0.15     | 0.16     | 0.14     | 0.13     | 0.05     | 0.20    | 0.16     | 0.22     | 0.22     | 0.16     | 0.18     |
| GT78       | 0.00     | 0.00     | 0.00     | 0.00     | 0.00     | 0.00     | 0.00     | 0.00     | 0.00     | 0.00     | 0.00    | 0.00     | 0.00     | 0.00     | 0.00     | 0.00     |
| GH8        | 0.09     | 0.08     | 0.07     | 0.02     | 0.12     | 0.07     | 0.01     | 0.03     | 0.00     | 0.08     | 0.06    | 0.03     | 0.04     | 0.05     | 0.05     | 0.02     |
| GH70       | 0.26     | 0.00     | 0.00     | 0.00     | 0.00     | 0.00     | 0.00     | 0.00     | 0.00     | 0.00     | 0.04    | 0.00     | 0.00     | 0.00     | 0.00     | 0.00     |
| GH122      | 0.00     | 0.00     | 0.00     | 0.00     | 0.00     | 0.00     | 0.00     | 0.00     | 0.00     | 0.00     | 0.00    | 0.00     | 0.00     | 0.00     | 0.00     | 0.00     |
| GH74       | 0.00     | 0.05     | 0.04     | 0.00     | 0.00     | 0.04     | 0.03     | 0.00     | 0.01     | 0.02     | 0.00    | 0.00     | 0.01     | 0.04     | 0.04     | 0.00     |
| GT41       | 0.00     | 0.00     | 0.02     | 0.02     | 0.01     | 0.00     | 0.01     | 0.00     | 0.00     | 0.00     | 0.00    | 0.00     | 0.03     | 0.00     | 0.01     | 0.00     |
| PL1        | 0.33     | 0.22     | 0.12     | 0.37     | 0.28     | 0.18     | 0.32     | 0.22     | 0.11     | 0.24     | 0.36    | 0.26     | 0.21     | 0.11     | 0.14     | 0.25     |
| GH15       | 0.05     | 0.00     | 0.04     | 0.02     | 0.07     | 0.02     | 0.09     | 0.05     | 0.05     | 0.07     | 0.16    | 0.07     | 0.04     | 0.02     | 0.07     | 0.05     |
| GH32       | 0.92     | 0.45     | 0.27     | 0.57     | 0.47     | 0.47     | 0.58     | 0.22     | 0.24     | 0.33     | 0.71    | 0.31     | 0.61     | 0.38     | 0.33     | 0.54     |
| GH44       | 0.00     | 0.00     | 0.00     | 0.00     | 0.00     | 0.00     | 0.00     | 0.00     | 0.01     | 0.00     | 0.00    | 0.00     | 0.00     | 0.01     | 0.00     | 0.00     |
| GT6        | 0.00     | 0.01     | 0.00     | 0.00     | 0.00     | 0.00     | 0.00     | 0.01     | 0.00     | 0.00     | 0.00    | 0.00     | 0.00     | 0.00     | 0.00     | 0.00     |
| GH13       | 2.89     | 3.55     | 3.20     | 3.66     | 3.46     | 3.47     | 2.92     | 2.62     | 2.44     | 2.91     | 3.95    | 2.85     | 3.62     | 3.34     | 2.85     | 3.51     |
| GT80       | 0.03     | 0.00     | 0.01     | 0.00     | 0.01     | 0.00     | 0.01     | 0.01     | 0.03     | 0.01     | 0.01    | 0.01     | 0.01     | 0.01     | 0.00     | 0.00     |
| GH71       | 0.00     | 0.00     | 0.00     | 0.00     | 0.00     | 0.00     | 0.00     | 0.00     | 0.00     | 0.00     | 0.00    | 0.00     | 0.00     | 0.00     | 0.00     | 0.00     |
| GH63       | 0.12     | 0.09     | 0.12     | 0.09     | 0.10     | 0.02     | 0.15     | 0.06     | 0.09     | 0.07     | 0.14    | 0.10     | 0.09     | 0.05     | 0.12     | 0.07     |
| PL21       | 0.00     | 0.02     | 0.00     | 0.06     | 0.04     | 0.00     | 0.11     | 0.02     | 0.01     | 0.03     | 0.00    | 0.09     | 0.01     | 0.00     | 0.00     | 0.00     |
| GH65       | 0.19     | 0.15     | 0.13     | 0.09     | 0.14     | 0.07     | 0.11     | 0.14     | 0.09     | 0.11     | 0.19    | 0.19     | 0.09     | 0.08     | 0.05     | 0.10     |
| CE4        | 0.59     | 0.74     | 0.76     | 0.55     | 0.52     | 0.58     | 0.52     | 0.55     | 0.50     | 0.69     | 0.71    | 0.53     | 0.59     | 0.58     | 0.57     | 0.56     |
| CE14       | 0.03     | 0.02     | 0.01     | 0.02     | 0.03     | 0.02     | 0.03     | 0.02     | 0.02     | 0.01     | 0.01    | 0.02     | 0.01     | 0.01     | 0.01     | 0.02     |
| GH115      | 0.35     | 0.11     | 0.14     | 0.20     | 0.24     | 0.11     | 0.31     | 0.11     | 0.08     | 0.25     | 0.19    | 0.22     | 0.15     | 0.13     | 0.35     | 0.22     |
| GH104      | 0.00     | 0.00     | 0.00     | 0.00     | 0.00     | 0.00     | 0.00     | 0.00     | 0.00     | 0.00     | 0.00    | 0.00     | 0.00     | 0.00     | 0.00     | 0.00     |
| GH111      | 0.00     | 0.00     | 0.00     | 0.00     | 0.00     | 0.00     | 0.00     | 0.00     | 0.00     | 0.00     | 0.00    | 0.00     | 0.00     | 0.00     | 0.00     | 0.00     |
| GH95       | 0.59     | 0.33     | 0.36     | 0.24     | 0.63     | 0.35     | 0.60     | 0.33     | 0.36     | 0.45     | 0.89    | 0.56     | 0.29     | 0.24     | 0.59     | 0.56     |
| GT70       | 0.00     | 0.00     | 0.00     | 0.00     | 0.00     | 0.00     | 0.00     | 0.00     | 0.00     | 0.00     | 0.00    | 0.00     | 0.00     | 0.00     | 0.00     | 0.00     |
| CE10       | 0.12     | 0.07     | 0.12     | 0.11     | 0.12     | 0.13     | 0.12     | 0.07     | 0.13     | 0.14     | 0.36    | 0.23     | 0.11     | 0.13     | 0.18     | 0.21     |
| GH10       | 0.09     | 0.15     | 0.08     | 0.13     | 0.21     | 0.09     | 0.08     | 0.09     | 0.06     | 0.18     | 0.12    | 0.08     | 0.09     | 0.02     | 0.08     | 0.04     |
| GH130      | 0.30     | 0.29     | 0.27     | 0.24     | 0.33     | 0.29     | 0.33     | 0.26     | 0.19     | 0.36     | 0.41    | 0.26     | 0.18     | 0.24     | 0.21     | 0.28     |
| PL20       | 0.00     | 0.00     | 0.00     | 0.00     | 0.00     | 0.00     | 0.00     | 0.00     | 0.00     | 0.00     | 0.00    | 0.00     | 0.00     | 0.00     | 0.00     | 0.00     |
| GH69       | 0.00     | 0.00     | 0.00     | 0.00     | 0.00     | 0.00     | 0.00     | 0.00     | 0.00     | 0.00     | 0.00    | 0.00     | 0.00     | 0.00     | 0.00     | 0.00     |
| PL2        | 0.00     | 0.00     | 0.00     | 0.00     | 0.00     | 0.00     | 0.00     | 0.00     | 0.00     | 0.00     | 0.00    | 0.00     | 0.00     | 0.00     | 0.00     | 0.00     |
| GH49       | 0.00     | 0.00     | 0.00     | 0.00     | 0.00     | 0.00     | 0.00     | 0.00     | 0.00     | 0.00     | 0.00    | 0.00     | 0.00     | 0.00     | 0.00     | 0.00     |
| GH25       | 0.45     | 0.39     | 0.43     | 0.55     | 0.59     | 0.48     | 0.39     | 0.32     | 0.29     | 0.45     | 0.53    | 0.26     | 0.51     | 0.30     | 0.40     | 0.34     |
| GH59       | 0.00     | 0.06     | 0.04     | 0.00     | 0.01     | 0.05     | 0.03     | 0.00     | 0.07     | 0.01     | 0.00    | 0.00     | 0.01     | 0.03     | 0.01     | 0.00     |
| GH35       | 0.30     | 0.13     | 0.32     | 0.20     | 0.34     | 0.24     | 0.25     | 0.26     | 0.26     | 0.37     | 0.48    | 0.42     | 0.17     | 0.20     | 0.30     | 0.43     |
| GT39       | 0.00     | 0.01     | 0.00     | 0.00     | 0.00     | 0.00     | 0.00     | 0.00     | 0.00     | 0.01     | 0.00    | 0.01     | 0.00     | 0.01     | 0.00     | 0.00     |
| GT57       | 0.00     | 0.00     | 0.00     | 0.00     | 0.00     | 0.00     | 0.00     | 0.00     | 0.00     | 0.00     | 0.00    | 0.00     | 0.00     | 0.00     | 0.00     | 0.00     |
| GH129      | 0.12     | 0.03     | 0.01     | 0.02     | 0.00     | 0.02     | 0.05     | 0.02     | 0.00     | 0.00     | 0.02    | 0.01     | 0.04     | 0.10     | 0.00     | 0.05     |
| GT22       | 0.00     | 0.00     | 0.00     | 0.00     | 0.00     | 0.00     | 0.00     | 0.00     | 0.00     | 0.00     | 0.00    | 0.00     | 0.00     | 0.00     | 0.00     | 0.00     |
| PL12       | 0.10     | 0.07     | 0.03     | 0.09     | 0.10     | 0.09     | 0.11     | 0.04     | 0.07     | 0.10     | 0.06    | 0.14     | 0.03     | 0.03     | 0.04     | 0.08     |
| PL18       | 0.00     | 0.00     | 0.00     | 0.00     | 0.00     | 0.00     | 0.00     | 0.00     | 0.00     | 0.00     | 0.00    | 0.00     | 0.00     | 0.00     | 0.00     | 0.00     |
| GT92       | 0.00     | 0.00     | 0.00     | 0.00     | 0.00     | 0.00     | 0.00     | 0.00     | 0.00     | 0.00     | 0.00    | 0.00     | 0.00     | 0.00     | 0.00     | 0.00     |
| GT44       | 0.02     | 0.00     | 0.00     | 0.02     | 0.00     | 0.00     | 0.01     | 0.00     | 0.00     | 0.00     | 0.00    | 0.00     | 0.00     | 0.00     | 0.00     | 0.00     |
| GT29       | 0.00     | 0.00     | 0.00     | 0.00     | 0.00     | 0.00     | 0.01     | 0.00     | 0.00     | 0.00     | 0.00    | 0.00     | 0.00     | 0.00     | 0.00     | 0.00     |
| GT13       | 0.00     | 0.00     | 0.00     | 0.00     | 0.00     | 0.00     | 0.00     | 0.00     | 0.00     | 0.00     | 0.00    | 0.00     | 0.00     | 0.00     | 0.00     | 0.00     |

Normalized\_abundance\_2

| CAZY_group | ES-AD-20 | ES-AD-21 | ES-AD-22 | ES-AD-23 | ES-AD-24 | ES-AD-25 | ES-AD-26 | ES-AD-27 | ES-AD-28 | ES-AD-29 | ES-AD-3 | ES-AD-30 | ES-AD-31 | ES-AD-32 | ES-AD-33 | ES-AD-34 |
|------------|----------|----------|----------|----------|----------|----------|----------|----------|----------|----------|---------|----------|----------|----------|----------|----------|
| GT52       | 0.00     | 0.00     | 0.00     | 0.00     | 0.00     | 0.00     | 0.00     | 0.00     | 0.00     | 0.00     | 0.00    | 0.00     | 0.00     | 0.00     | 0.00     | 0.00     |
| GT64       | 0.00     | 0.00     | 0.00     | 0.00     | 0.00     | 0.00     | 0.00     | 0.00     | 0.00     | 0.00     | 0.00    | 0.00     | 0.00     | 0.00     | 0.00     | 0.00     |
| GT85       | 0.00     | 0.00     | 0.00     | 0.00     | 0.00     | 0.00     | 0.00     | 0.00     | 0.00     | 0.00     | 0.00    | 0.00     | 0.00     | 0.00     | 0.00     | 0.00     |
| GT16       | 0.00     | 0.00     | 0.00     | 0.00     | 0.00     | 0.00     | 0.00     | 0.00     | 0.00     | 0.00     | 0.00    | 0.00     | 0.00     | 0.00     | 0.00     | 0.00     |
| GH56       | 0.00     | 0.00     | 0.00     | 0.00     | 0.00     | 0.00     | 0.00     | 0.00     | 0.00     | 0.00     | 0.00    | 0.00     | 0.00     | 0.00     | 0.00     | 0.00     |
| GT60       | 0.00     | 0.00     | 0.00     | 0.00     | 0.00     | 0.00     | 0.00     | 0.00     | 0.00     | 0.00     | 0.00    | 0.00     | 0.00     | 0.00     | 0.00     | 0.00     |
| GH41       | 0.00     | 0.00     | 0.00     | 0.00     | 0.00     | 0.00     | 0.00     | 0.00     | 0.00     | 0.00     | 0.00    | 0.00     | 0.00     | 0.00     | 0.00     | 0.00     |
| CE7        | 0.12     | 0.07     | 0.07     | 0.09     | 0.13     | 0.04     | 0.07     | 0.05     | 0.05     | 0.13     | 0.11    | 0.13     | 0.11     | 0.07     | 0.12     | 0.14     |
| GH39       | 0.05     | 0.08     | 0.03     | 0.06     | 0.05     | 0.05     | 0.00     | 0.04     | 0.00     | 0.06     | 0.04    | 0.01     | 0.05     | 0.06     | 0.05     | 0.00     |
| GT30       | 0.26     | 0.18     | 0.21     | 0.24     | 0.25     | 0.18     | 0.29     | 0.17     | 0.31     | 0.24     | 0.35    | 0.24     | 0.19     | 0.12     | 0.31     | 0.28     |
| PL15       | 0.10     | 0.02     | 0.02     | 0.06     | 0.12     | 0.07     | 0.13     | 0.02     | 0.03     | 0.06     | 0.16    | 0.19     | 0.03     | 0.03     | 0.03     | 0.15     |
| GH102      | 0.00     | 0.02     | 0.06     | 0.02     | 0.00     | 0.01     | 0.05     | 0.01     | 0.00     | 0.05     | 0.04    | 0.01     | 0.02     | 0.02     | 0.03     | 0.01     |

## Normalized\_abundance\_2

| CAZY_group | ES-AD-35 | ES-AD-36 | ES-AD-37 | ES-AD-38 | ES-AD-39 | ES-AD-4 | ES-AD-5 | ES-AD-6 | ES-AD-7 | ES-AD-8 | ES-AD-9 | FR-AD-1 | FR-AD-2 | FR-AD-3 | FR-AD-4 | FR-AD-5 |
|------------|----------|----------|----------|----------|----------|---------|---------|---------|---------|---------|---------|---------|---------|---------|---------|---------|
| GH29       | 0.71     | 0.82     | 1.03     | 0.81     | 0.55     | 0.80    | 0.57    | 0.51    | 0.63    | 0.85    | 0.49    | 0.87    | 0.90    | 1.39    | 0.87    | 0.64    |
| PL4        | 0.00     | 0.00     | 0.00     | 0.00     | 0.00     | 0.00    | 0.00    | 0.00    | 0.00    | 0.00    | 0.00    | 0.00    | 0.00    | 0.00    | 0.00    | 0.00    |
| GH23       | 0.94     | 1.16     | 1.23     | 0.96     | 1.06     | 1.81    | 1.06    | 0.75    | 0.86    | 1.40    | 1.08    | 1.61    | 1.86    | 1.67    | 1.55    | 1.62    |
| CE6        | 0.00     | 0.06     | 0.00     | 0.01     | 0.02     | 0.03    | 0.00    | 0.03    | 0.01    | 0.03    | 0.00    | 0.00    | 0.02    | 0.05    | 0.00    | 0.01    |
| GH72       | 0.07     | 0.09     | 0.07     | 0.11     | 0.11     | 0.11    | 0.16    | 0.07    | 0.07    | 0.16    | 0.12    | 0.24    | 0.20    | 0.18    | 0.18    | 0.13    |
| GH114      | 0.00     | 0.00     | 0.00     | 0.00     | 0.00     | 0.00    | 0.00    | 0.00    | 0.00    | 0.00    | 0.00    | 0.00    | 0.00    | 0.00    | 0.00    | 0.00    |
| GH78       | 0.47     | 0.69     | 0.89     | 0.67     | 0.49     | 1.40    | 0.33    | 0.38    | 0.47    | 0.88    | 0.15    | 0.55    | 1.04    | 1.29    | 0.85    | 0.98    |
| PL19       | 0.00     | 0.00     | 0.00     | 0.00     | 0.00     | 0.00    | 0.00    | 0.00    | 0.00    | 0.00    | 0.00    | 0.00    | 0.00    | 0.00    | 0.00    | 0.00    |
| GT27       | 0.00     | 0.00     | 0.00     | 0.00     | 0.00     | 0.00    | 0.00    | 0.00    | 0.00    | 0.00    | 0.00    | 0.00    | 0.00    | 0.00    | 0.00    | 0.00    |
| GH5        | 0.35     | 0.74     | 0.24     | 0.43     | 0.34     | 0.42    | 0.18    | 0.56    | 0.61    | 0.31    | 0.86    | 0.58    | 0.55    | 0.65    | 0.58    | 0.46    |
| GT40       | 0.00     | 0.00     | 0.00     | 0.00     | 0.00     | 0.00    | 0.00    | 0.00    | 0.00    | 0.00    | 0.00    | 0.00    | 0.00    | 0.00    | 0.00    | 0.00    |
| CE13       | 0.00     | 0.00     | 0.00     | 0.00     | 0.00     | 0.00    | 0.00    | 0.00    | 0.00    | 0.00    | 0.00    | 0.00    | 0.00    | 0.00    | 0.00    | 0.00    |
| GT37       | 0.00     | 0.00     | 0.00     | 0.00     | 0.00     | 0.00    | 0.00    | 0.00    | 0.00    | 0.00    | 0.00    | 0.00    | 0.00    | 0.00    | 0.00    | 0.00    |
| GH33       | 0.15     | 0.18     | 0.27     | 0.19     | 0.20     | 0.21    | 0.10    | 0.12    | 0.17    | 0.21    | 0.03    | 0.26    | 0.30    | 0.39    | 0.26    | 0.14    |
| GT65       | 0.00     | 0.00     | 0.00     | 0.00     | 0.00     | 0.00    | 0.00    | 0.00    | 0.00    | 0.00    | 0.00    | 0.00    | 0.00    | 0.00    | 0.00    | 0.00    |
| GH86       | 0.00     | 0.00     | 0.00     | 0.00     | 0.01     | 0.00    | 0.00    | 0.00    | 0.00    | 0.00    | 0.00    | 0.01    | 0.00    | 0.02    | 0.00    | 0.00    |
| GH123      | 0.10     | 0.08     | 0.25     | 0.09     | 0.05     | 0.17    | 0.02    | 0.05    | 0.09    | 0.16    | 0.06    | 0.13    | 0.15    | 0.22    | 0.11    | 0.07    |
| GH96       | 0.00     | 0.00     | 0.00     | 0.00     | 0.00     | 0.00    | 0.00    | 0.00    | 0.00    | 0.00    | 0.00    | 0.00    | 0.00    | 0.00    | 0.00    | 0.00    |
| GH14       | 0.00     | 0.00     | 0.00     | 0.00     | 0.00     | 0.00    | 0.00    | 0.00    | 0.00    | 0.00    | 0.00    | 0.00    | 0.00    | 0.00    | 0.00    | 0.00    |
| CE3        | 0.00     | 0.00     | 0.00     | 0.00     | 0.00     | 0.00    | 0.00    | 0.00    | 0.00    | 0.00    | 0.00    | 0.00    | 0.00    | 0.00    | 0.00    | 0.00    |
| PL10       | 0.04     | 0.12     | 0.20     | 0.09     | 0.03     | 0.12    | 0.14    | 0.10    | 0.09    | 0.21    | 0.18    | 0.07    | 0.17    | 0.37    | 0.11    | 0.20    |
| GT48       | 0.00     | 0.00     | 0.00     | 0.00     | 0.00     | 0.00    | 0.00    | 0.00    | 0.00    | 0.00    | 0.00    | 0.00    | 0.00    | 0.00    | 0.00    | 0.00    |
| PL6        | 0.00     | 0.00     | 0.00     | 0.01     | 0.00     | 0.00    | 0.00    | 0.00    | 0.00    | 0.00    | 0.00    | 0.00    | 0.02    | 0.00    | 0.00    | 0.00    |
| GT83       | 0.05     | 0.05     | 0.25     | 0.05     | 0.04     | 0.03    | 0.10    | 0.05    | 0.02    | 0.13    | 0.00    | 0.06    | 0.13    | 0.08    | 0.11    | 0.01    |
| GH126      | 0.00     | 0.00     | 0.00     | 0.00     | 0.00     | 0.00    | 0.00    | 0.00    | 0.00    | 0.00    | 0.00    | 0.00    | 0.00    | 0.00    | 0.00    | 0.00    |
| GH9        | 0.11     | 0.36     | 0.07     | 0.13     | 0.26     | 0.25    | 0.00    | 0.34    | 0.09    | 0.54    | 0.52    | 0.27    | 0.42    | 0.55    | 0.27    | 0.09    |
| GH75       | 0.00     | 0.00     | 0.00     | 0.00     | 0.00     | 0.00    | 0.00    | 0.00    | 0.00    | 0.00    | 0.00    | 0.00    | 0.00    | 0.00    | 0.00    | 0.00    |
| GT71       | 0.00     | 0.00     | 0.00     | 0.00     | 0.00     | 0.00    | 0.00    | 0.00    | 0.00    | 0.00    | 0.00    | 0.00    | 0.00    | 0.00    | 0.00    | 0.00    |
| GH46       | 0.00     | 0.00     | 0.00     | 0.00     | 0.00     | 0.00    | 0.00    | 0.00    | 0.00    | 0.00    | 0.00    | 0.00    | 0.00    | 0.00    | 0.00    | 0.00    |
| GT61       | 0.00     | 0.00     | 0.00     | 0.00     | 0.00     | 0.00    | 0.00    | 0.00    | 0.00    | 0.00    | 0.00    | 0.00    | 0.00    | 0.00    | 0.00    | 0.00    |
| GT3        | 0.13     | 0.16     | 0.14     | 0.08     | 0.13     | 0.34    | 0.06    | 0.11    | 0.12    | 0.23    | 0.15    | 0.20    | 0.23    | 0.40    | 0.16    | 0.20    |
| PL3        | 0.00     | 0.00     | 0.00     | 0.00     | 0.00     | 0.00    | 0.02    | 0.00    | 0.00    | 0.00    | 0.00    | 0.00    | 0.00    | 0.00    | 0.00    | 0.00    |
| GH108      | 0.04     | 0.05     | 0.04     | 0.03     | 0.03     | 0.01    | 0.04    | 0.03    | 0.04    | 0.08    | 0.00    | 0.01    | 0.03    | 0.07    | 0.01    | 0.03    |
| GT56       | 0.00     | 0.01     | 0.00     | 0.00     | 0.00     | 0.00    | 0.00    | 0.00    | 0.00    | 0.00    | 0.00    | 0.00    | 0.00    | 0.00    | 0.01    | 0.00    |
| PL11       | 0.09     | 0.12     | 0.09     | 0.05     | 0.03     | 0.16    | 0.02    | 0.07    | 0.11    | 0.13    | 0.00    | 0.16    | 0.10    | 0.25    | 0.06    | 0.16    |
| GH45       | 0.00     | 0.00     | 0.02     | 0.00     | 0.00     | 0.01    | 0.02    | 0.00    | 0.00    | 0.00    | 0.00    | 0.00    | 0.00    | 0.02    | 0.00    | 0.00    |
| GT34       | 0.00     | 0.00     | 0.00     | 0.00     | 0.00     | 0.00    | 0.00    | 0.00    | 0.00    | 0.00    | 0.00    | 0.01    | 0.00    | 0.00    | 0.00    | 0.01    |
| PL14       | 0.00     | 0.00     | 0.00     | 0.00     | 0.00     | 0.00    | 0.00    | 0.00    | 0.00    | 0.00    | 0.00    | 0.00    | 0.00    | 0.00    | 0.00    | 0.00    |
| GH19       | 0.01     | 0.06     | 0.00     | 0.00     | 0.01     | 0.00    | 0.00    | 0.01    | 0.00    | 0.03    | 0.00    | 0.00    | 0.00    | 0.02    | 0.00    | 0.00    |
| GH118      | 0.00     | 0.00     | 0.00     | 0.00     | 0.00     | 0.00    | 0.00    | 0.00    | 0.00    | 0.00    | 0.00    | 0.00    | 0.00    | 0.00    | 0.00    | 0.00    |
| GH82       | 0.00     | 0.00     | 0.00     | 0.00     | 0.00     | 0.00    | 0.00    | 0.00    | 0.00    | 0.00    | 0.00    | 0.00    | 0.00    | 0.00    | 0.00    | 0.00    |
| GH76       | 0.08     | 0.18     | 0.18     | 0.10     | 0.04     | 0.28    | 0.04    | 0.08    | 0.01    | 0.16    | 0.00    | 0.06    | 0.13    | 0.28    | 0.03    | 0.10    |
| GT4        | 1.65     | 1.82     | 1.86     | 1.59     | 1.53     | 2.87    | 1.61    | 1.81    | 1.66    | 2.07    | 1.63    | 2.12    | 2.86    | 3.01    | 2.97    | 2.47    |
| GT87       | 0.01     | 0.00     | 0.02     | 0.00     | 0.00     | 0.00    | 0.00    | 0.00    | 0.00    | 0.00    | 0.00    | 0.01    | 0.02    | 0.00    | 0.00    | 0.00    |
| GH24       | 0.13     | 0.09     | 0.11     | 0.05     | 0.06     | 0.12    | 0.14    | 0.08    | 0.16    | 0.18    | 0.12    | 0.23    | 0.18    | 0.12    | 0.18    | 0.14    |
| GH90       | 0.00     | 0.00     | 0.00     | 0.00     | 0.00     | 0.00    | 0.00    | 0.00    | 0.00    | 0.00    | 0.00    | 0.00    | 0.00    | 0.00    | 0.00    | 0.00    |
| GH57       | 0.14     | 0.10     | 0.13     | 0.06     | 0.18     | 0.19    | 0.08    | 0.11    | 0.09    | 0.23    | 0.12    | 0.11    | 0.17    | 0.23    | 0.11    | 0.10    |
| GH36       | 0.69     | 0.66     | 0.61     | 0.64     | 0.50     | 0.94    | 0.73    | 0.67    | 0.64    | 0.72    | 0.74    | 0.94    | 0.95    | 1.16    | 1.18    | 0.95    |
| GT46       | 0.00     | 0.00     | 0.00     | 0.00     | 0.00     | 0.00    | 0.00    | 0.00    | 0.00    | 0.00    | 0.00    | 0.00    | 0.00    | 0.00    | 0.00    | 0.00    |
| GH66       | 0.00     | 0.06     | 0.02     | 0.02     | 0.01     | 0.05    | 0.00    | 0.03    | 0.00    | 0.08    | 0.00    | 0.01    | 0.10    | 0.02    | 0.03    | 0.06    |

Normalized\_abundance\_2

| CAZY_group | ES-AD-35 | ES-AD-36 | ES-AD-37 | ES-AD-38 | ES-AD-39 | ES-AD-4 | ES-AD-5 | ES-AD-6 | ES-AD-7 | ES-AD-8 | ES-AD-9 | FR-AD-1 | FR-AD-2 | FR-AD-3 | FR-AD-4 | FR-AD-5 |
|------------|----------|----------|----------|----------|----------|---------|---------|---------|---------|---------|---------|---------|---------|---------|---------|---------|
| GH48       | 0.00     | 0.00     | 0.00     | 0.01     | 0.00     | 0.00    | 0.00    | 0.00    | 0.01    | 0.00    | 0.00    | 0.00    | 0.01    | 0.00    | 0.02    | 0.00    |
| GT53       | 0.00     | 0.00     | 0.00     | 0.00     | 0.00     | 0.00    | 0.00    | 0.00    | 0.00    | 0.00    | 0.00    | 0.00    | 0.00    | 0.00    | 0.00    | 0.00    |
| GH60       | 0.00     | 0.00     | 0.00     | 0.00     | 0.00     | 0.00    | 0.00    | 0.00    | 0.00    | 0.00    | 0.00    | 0.00    | 0.00    | 0.00    | 0.00    | 0.00    |
| GT31       | 0.00     | 0.01     | 0.00     | 0.00     | 0.00     | 0.00    | 0.00    | 0.00    | 0.00    | 0.00    | 0.00    | 0.00    | 0.00    | 0.00    | 0.00    | 0.00    |
| GH105      | 0.37     | 0.50     | 0.49     | 0.30     | 0.25     | 0.68    | 0.31    | 0.16    | 0.28    | 0.54    | 0.25    | 0.33    | 0.49    | 0.94    | 0.67    | 0.62    |
| GT23       | 0.01     | 0.02     | 0.00     | 0.01     | 0.01     | 0.00    | 0.00    | 0.00    | 0.00    | 0.00    | 0.00    | 0.00    | 0.02    | 0.03    | 0.01    | 0.00    |
| GH11       | 0.01     | 0.00     | 0.00     | 0.00     | 0.01     | 0.01    | 0.00    | 0.01    | 0.02    | 0.00    | 0.00    | 0.00    | 0.00    | 0.02    | 0.00    | 0.00    |
| GT38       | 0.00     | 0.00     | 0.00     | 0.00     | 0.00     | 0.00    | 0.00    | 0.00    | 0.00    | 0.00    | 0.00    | 0.00    | 0.00    | 0.00    | 0.00    | 0.00    |
| GT43       | 0.00     | 0.00     | 0.00     | 0.00     | 0.00     | 0.00    | 0.00    | 0.00    | 0.00    | 0.00    | 0.00    | 0.00    | 0.00    | 0.00    | 0.00    | 0.00    |
| GH99       | 0.00     | 0.00     | 0.00     | 0.00     | 0.00     | 0.02    | 0.00    | 0.00    | 0.00    | 0.00    | 0.03    | 0.01    | 0.00    | 0.00    | 0.00    | 0.00    |
| GH38       | 0.14     | 0.24     | 0.16     | 0.20     | 0.23     | 0.51    | 0.14    | 0.16    | 0.23    | 0.13    | 0.12    | 0.23    | 0.25    | 0.25    | 0.31    | 0.40    |
| GH109      | 0.24     | 0.26     | 0.42     | 0.21     | 0.23     | 0.38    | 0.06    | 0.14    | 0.22    | 0.44    | 0.18    | 0.30    | 0.28    | 0.87    | 0.33    | 0.20    |
| GH2        | 3.15     | 4.04     | 4.12     | 2.86     | 2.54     | 5.51    | 2.63    | 2.74    | 2.55    | 3.90    | 2.34    | 4.25    | 5.19    | 6.91    | 5.06    | 3.83    |
| GT28       | 0.41     | 0.41     | 0.38     | 0.51     | 0.48     | 0.65    | 0.47    | 0.31    | 0.46    | 0.28    | 0.52    | 0.64    | 0.62    | 0.47    | 0.48    | 0.51    |
| GH42       | 0.21     | 0.13     | 0.20     | 0.28     | 0.23     | 0.19    | 0.59    | 0.10    | 0.15    | 0.08    | 0.18    | 0.21    | 0.20    | 0.33    | 0.53    | 0.39    |
| GT58       | 0.00     | 0.00     | 0.00     | 0.00     | 0.00     | 0.00    | 0.00    | 0.00    | 0.00    | 0.00    | 0.00    | 0.00    | 0.00    | 0.00    | 0.00    | 0.00    |
| GH61       | 0.00     | 0.00     | 0.00     | 0.00     | 0.00     | 0.00    | 0.00    | 0.00    | 0.00    | 0.00    | 0.00    | 0.00    | 0.00    | 0.00    | 0.00    | 0.00    |
| GH80       | 0.00     | 0.00     | 0.00     | 0.00     | 0.00     | 0.00    | 0.00    | 0.00    | 0.00    | 0.00    | 0.00    | 0.00    | 0.00    | 0.00    | 0.00    | 0.00    |
| GH98       | 0.00     | 0.01     | 0.00     | 0.00     | 0.00     | 0.00    | 0.00    | 0.03    | 0.00    | 0.00    | 0.00    | 0.03    | 0.00    | 0.00    | 0.00    | 0.00    |
| GH6        | 0.00     | 0.00     | 0.00     | 0.00     | 0.00     | 0.00    | 0.00    | 0.00    | 0.00    | 0.00    | 0.00    | 0.00    | 0.00    | 0.00    | 0.00    | 0.00    |
| GT1        | 0.04     | 0.06     | 0.04     | 0.04     | 0.03     | 0.03    | 0.04    | 0.00    | 0.03    | 0.03    | 0.12    | 0.03    | 0.03    | 0.07    | 0.09    | 0.07    |
| GH28       | 0.49     | 0.76     | 0.54     | 0.41     | 0.50     | 0.99    | 0.45    | 0.33    | 0.60    | 0.96    | 0.55    | 0.78    | 1.04    | 1.29    | 1.10    | 0.91    |
| GT42       | 0.00     | 0.00     | 0.00     | 0.00     | 0.00     | 0.00    | 0.00    | 0.00    | 0.00    | 0.00    | 0.00    | 0.00    | 0.00    | 0.00    | 0.00    | 0.00    |
| GH128      | 0.00     | 0.00     | 0.00     | 0.00     | 0.00     | 0.00    | 0.00    | 0.00    | 0.00    | 0.00    | 0.00    | 0.00    | 0.00    | 0.00    | 0.00    | 0.00    |
| CE12       | 0.06     | 0.12     | 0.05     | 0.02     | 0.03     | 0.13    | 0.08    | 0.15    | 0.14    | 0.16    | 0.09    | 0.06    | 0.13    | 0.17    | 0.14    | 0.10    |
| CE16       | 0.00     | 0.00     | 0.00     | 0.00     | 0.00     | 0.00    | 0.00    | 0.00    | 0.00    | 0.00    | 0.00    | 0.00    | 0.00    | 0.00    | 0.00    | 0.00    |
| GT89       | 0.00     | 0.00     | 0.00     | 0.00     | 0.00     | 0.00    | 0.00    | 0.00    | 0.00    | 0.00    | 0.00    | 0.00    | 0.00    | 0.00    | 0.00    | 0.00    |
| GT11       | 0.04     | 0.09     | 0.04     | 0.04     | 0.03     | 0.06    | 0.02    | 0.03    | 0.11    | 0.05    | 0.06    | 0.06    | 0.08    | 0.15    | 0.07    | 0.04    |
| GT77       | 0.00     | 0.00     | 0.02     | 0.01     | 0.00     | 0.01    | 0.00    | 0.00    | 0.00    | 0.00    | 0.00    | 0.00    | 0.00    | 0.00    | 0.01    | 0.00    |
| GT55       | 0.00     | 0.00     | 0.00     | 0.00     | 0.00     | 0.00    | 0.00    | 0.00    | 0.00    | 0.00    | 0.00    | 0.00    | 0.00    | 0.00    | 0.00    | 0.00    |
| GT18       | 0.00     | 0.00     | 0.00     | 0.00     | 0.00     | 0.00    | 0.00    | 0.00    | 0.00    | 0.00    | 0.00    | 0.00    | 0.00    | 0.00    | 0.00    | 0.00    |
| GH87       | 0.00     | 0.05     | 0.00     | 0.00     | 0.00     | 0.01    | 0.00    | 0.00    | 0.00    | 0.00    | 0.03    | 0.00    | 0.00    | 0.00    | 0.00    | 0.00    |
| PL5        | 0.00     | 0.00     | 0.00     | 0.00     | 0.00     | 0.00    | 0.00    | 0.00    | 0.00    | 0.00    | 0.00    | 0.00    | 0.00    | 0.00    | 0.00    | 0.00    |
| GH22       | 0.00     | 0.00     | 0.00     | 0.00     | 0.00     | 0.00    | 0.00    | 0.00    | 0.00    | 0.00    | 0.00    | 0.00    | 0.00    | 0.00    | 0.00    | 0.00    |
| CE2        | 0.06     | 0.06     | 0.02     | 0.08     | 0.08     | 0.06    | 0.04    | 0.03    | 0.07    | 0.00    | 0.12    | 0.06    | 0.03    | 0.05    | 0.07    | 0.09    |
| GH120      | 0.08     | 0.07     | 0.07     | 0.10     | 0.06     | 0.05    | 0.10    | 0.07    | 0.04    | 0.03    | 0.03    | 0.04    | 0.03    | 0.05    | 0.11    | 0.10    |
| GH73       | 0.39     | 0.48     | 0.47     | 0.52     | 0.48     | 0.43    | 0.55    | 0.40    | 0.38    | 0.54    | 0.61    | 0.50    | 0.40    | 0.47    | 0.44    | 0.46    |
| GT17       | 0.00     | 0.02     | 0.00     | 0.00     | 0.00     | 0.00    | 0.00    | 0.00    | 0.00    | 0.00    | 0.00    | 0.00    | 0.00    | 0.00    | 0.00    | 0.00    |
| GH124      | 0.00     | 0.00     | 0.00     | 0.00     | 0.00     | 0.00    | 0.00    | 0.00    | 0.00    | 0.00    | 0.00    | 0.00    | 0.00    | 0.00    | 0.00    | 0.00    |
| GH54       | 0.00     | 0.00     | 0.00     | 0.00     | 0.00     | 0.00    | 0.00    | 0.00    | 0.00    | 0.00    | 0.00    | 0.00    | 0.00    | 0.00    | 0.00    | 0.00    |
| GH100      | 0.00     | 0.00     | 0.00     | 0.00     | 0.00     | 0.00    | 0.00    | 0.00    | 0.00    | 0.00    | 0.00    | 0.00    | 0.00    | 0.00    | 0.00    | 0.00    |
| GH113      | 0.05     | 0.05     | 0.00     | 0.02     | 0.01     | 0.00    | 0.04    | 0.01    | 0.04    | 0.00    | 0.00    | 0.03    | 0.00    | 0.03    | 0.03    | 0.00    |
| GT5        | 0.47     | 0.46     | 0.40     | 0.53     | 0.53     | 0.65    | 0.55    | 0.42    | 0.46    | 0.41    | 0.68    | 0.61    | 0.57    | 0.52    | 0.51    | 0.65    |
| GH94       | 0.56     | 0.51     | 0.20     | 0.37     | 0.33     | 0.53    | 0.57    | 0.33    | 0.51    | 0.18    | 1.05    | 0.54    | 0.49    | 0.54    | 0.74    | 0.58    |
| GT66       | 0.00     | 0.00     | 0.00     | 0.01     | 0.00     | 0.00    | 0.00    | 0.03    | 0.00    | 0.05    | 0.00    | 0.00    | 0.00    | 0.00    | 0.00    | 0.04    |
| GT94       | 0.00     | 0.00     | 0.00     | 0.00     | 0.00     | 0.00    | 0.00    | 0.00    | 0.00    | 0.00    | 0.00    | 0.00    | 0.00    | 0.00    | 0.00    | 0.00    |
| GH58       | 0.00     | 0.00     | 0.00     | 0.00     | 0.00     | 0.00    | 0.00    | 0.00    | 0.00    | 0.00    | 0.00    | 0.00    | 0.00    | 0.00    | 0.00    | 0.00    |
| GH1        | 0.33     | 0.69     | 0.33     | 0.75     | 0.39     | 0.58    | 1.31    | 0.93    | 0.43    | 0.18    | 0.77    | 0.68    | 0.40    | 0.33    | 0.70    | 0.85    |
| PL22       | 0.00     | 0.02     | 0.00     | 0.00     | 0.00     | 0.00    | 0.00    | 0.00    | 0.00    | 0.00    | 0.00    | 0.00    | 0.00    | 0.00    | 0.00    | 0.00    |
| GT9        | 0.12     | 0.13     | 0.22     | 0.05     | 0.05     | 0.09    | 0.08    | 0.14    | 0.15    | 0.23    | 0.12    | 0.17    | 0.20    | 0.18    | 0.16    | 0.10    |

Normalized\_abundance\_2

| CAZY_group | ES-AD-35 | ES-AD-36 | ES-AD-37 | ES-AD-38 | ES-AD-39 | ES-AD-4 | ES-AD-5 | ES-AD-6 | ES-AD-7 | ES-AD-8 | ES-AD-9 | FR-AD-1 | FR-AD-2 | FR-AD-3 | FR-AD-4 | FR-AD-5 |
|------------|----------|----------|----------|----------|----------|---------|---------|---------|---------|---------|---------|---------|---------|---------|---------|---------|
| GT76       | 0.00     | 0.00     | 0.00     | 0.00     | 0.00     | 0.00    | 0.00    | 0.00    | 0.00    | 0.00    | 0.00    | 0.00    | 0.00    | 0.00    | 0.00    | 0.00    |
| GT32       | 0.05     | 0.06     | 0.09     | 0.15     | 0.05     | 0.16    | 0.02    | 0.04    | 0.09    | 0.05    | 0.06    | 0.09    | 0.13    | 0.20    | 0.14    | 0.16    |
| GT47       | 0.02     | 0.03     | 0.04     | 0.03     | 0.05     | 0.09    | 0.08    | 0.03    | 0.03    | 0.05    | 0.09    | 0.06    | 0.05    | 0.03    | 0.06    | 0.12    |
| GH84       | 0.12     | 0.12     | 0.22     | 0.14     | 0.10     | 0.18    | 0.14    | 0.07    | 0.07    | 0.18    | 0.06    | 0.11    | 0.23    | 0.20    | 0.13    | 0.07    |
| GH83       | 0.00     | 0.00     | 0.00     | 0.00     | 0.00     | 0.00    | 0.00    | 0.00    | 0.00    | 0.00    | 0.00    | 0.00    | 0.00    | 0.00    | 0.00    | 0.00    |
| GT59       | 0.00     | 0.00     | 0.00     | 0.00     | 0.00     | 0.00    | 0.00    | 0.00    | 0.00    | 0.00    | 0.00    | 0.00    | 0.00    | 0.00    | 0.00    | 0.00    |
| GH34       | 0.00     | 0.00     | 0.00     | 0.00     | 0.00     | 0.00    | 0.00    | 0.00    | 0.00    | 0.00    | 0.00    | 0.00    | 0.00    | 0.00    | 0.00    | 0.00    |
| GT14       | 0.03     | 0.02     | 0.00     | 0.03     | 0.03     | 0.07    | 0.00    | 0.03    | 0.04    | 0.03    | 0.03    | 0.03    | 0.01    | 0.02    | 0.05    | 0.04    |
| GH47       | 0.00     | 0.00     | 0.00     | 0.00     | 0.00     | 0.00    | 0.00    | 0.00    | 0.00    | 0.00    | 0.00    | 0.00    | 0.00    | 0.00    | 0.00    | 0.00    |
| GH97       | 0.63     | 0.71     | 0.83     | 0.46     | 0.47     | 1.02    | 0.18    | 0.60    | 0.45    | 0.83    | 0.34    | 0.85    | 1.20    | 1.59    | 0.81    | 0.61    |
| GH50       | 0.00     | 0.05     | 0.00     | 0.01     | 0.00     | 0.02    | 0.00    | 0.00    | 0.00    | 0.03    | 0.00    | 0.00    | 0.02    | 0.03    | 0.03    | 0.00    |
| GT26       | 0.16     | 0.25     | 0.24     | 0.19     | 0.29     | 0.26    | 0.16    | 0.19    | 0.25    | 0.21    | 0.18    | 0.14    | 0.23    | 0.27    | 0.21    | 0.17    |
| GH18       | 0.44     | 0.48     | 0.51     | 0.41     | 0.54     | 0.72    | 0.51    | 0.40    | 0.35    | 0.72    | 0.28    | 0.55    | 0.60    | 0.70    | 0.73    | 0.33    |
| GH37       | 0.01     | 0.03     | 0.00     | 0.00     | 0.01     | 0.00    | 0.00    | 0.01    | 0.00    | 0.00    | 0.00    | 0.00    | 0.00    | 0.00    | 0.00    | 0.00    |
| PL13       | 0.01     | 0.02     | 0.00     | 0.02     | 0.01     | 0.05    | 0.00    | 0.01    | 0.02    | 0.05    | 0.00    | 0.00    | 0.03    | 0.05    | 0.01    | 0.01    |
| GH27       | 0.15     | 0.15     | 0.20     | 0.14     | 0.14     | 0.28    | 0.10    | 0.22    | 0.22    | 0.26    | 0.12    | 0.14    | 0.33    | 0.37    | 0.24    | 0.26    |
| GT54       | 0.00     | 0.00     | 0.00     | 0.00     | 0.00     | 0.00    | 0.00    | 0.00    | 0.00    | 0.00    | 0.00    | 0.00    | 0.00    | 0.00    | 0.00    | 0.00    |
| GT91       | 0.00     | 0.00     | 0.00     | 0.00     | 0.00     | 0.00    | 0.00    | 0.00    | 0.00    | 0.00    | 0.00    | 0.00    | 0.00    | 0.00    | 0.00    | 0.00    |
| GT72       | 0.00     | 0.00     | 0.00     | 0.00     | 0.00     | 0.00    | 0.00    | 0.00    | 0.00    | 0.00    | 0.00    | 0.00    | 0.00    | 0.00    | 0.00    | 0.00    |
| GH67       | 0.07     | 0.07     | 0.07     | 0.05     | 0.04     | 0.08    | 0.02    | 0.05    | 0.03    | 0.08    | 0.00    | 0.09    | 0.03    | 0.12    | 0.04    | 0.09    |
| GH12       | 0.00     | 0.00     | 0.00     | 0.00     | 0.00     | 0.00    | 0.00    | 0.00    | 0.00    | 0.00    | 0.00    | 0.00    | 0.00    | 0.00    | 0.00    | 0.00    |
| GH91       | 0.03     | 0.02     | 0.04     | 0.04     | 0.02     | 0.02    | 0.02    | 0.01    | 0.02    | 0.00    | 0.00    | 0.01    | 0.02    | 0.00    | 0.01    | 0.01    |
| GT69       | 0.00     | 0.00     | 0.00     | 0.00     | 0.00     | 0.00    | 0.00    | 0.00    | 0.00    | 0.00    | 0.00    | 0.00    | 0.00    | 0.00    | 0.00    | 0.00    |
| GH106      | 0.12     | 0.21     | 0.27     | 0.12     | 0.15     | 0.35    | 0.02    | 0.11    | 0.10    | 0.44    | 0.03    | 0.24    | 0.12    | 0.50    | 0.26    | 0.27    |
| GT62       | 0.00     | 0.00     | 0.00     | 0.00     | 0.00     | 0.00    | 0.00    | 0.00    | 0.00    | 0.00    | 0.00    | 0.00    | 0.00    | 0.00    | 0.00    | 0.00    |
| GH17       | 0.00     | 0.00     | 0.00     | 0.00     | 0.00     | 0.01    | 0.00    | 0.00    | 0.00    | 0.00    | 0.00    | 0.00    | 0.00    | 0.00    | 0.00    | 0.00    |
| GH88       | 0.15     | 0.31     | 0.34     | 0.19     | 0.25     | 0.30    | 0.02    | 0.11    | 0.17    | 0.39    | 0.06    | 0.31    | 0.55    | 0.55    | 0.51    | 0.17    |
| CE5        | 0.00     | 0.00     | 0.00     | 0.00     | 0.00     | 0.00    | 0.00    | 0.00    | 0.00    | 0.00    | 0.00    | 0.00    | 0.02    | 0.00    | 0.00    | 0.00    |
| GT8        | 0.10     | 0.26     | 0.18     | 0.10     | 0.08     | 0.21    | 0.22    | 0.12    | 0.13    | 0.16    | 0.12    | 0.17    | 0.15    | 0.13    | 0.23    | 0.10    |
| GT50       | 0.00     | 0.00     | 0.00     | 0.00     | 0.00     | 0.00    | 0.00    | 0.00    | 0.00    | 0.00    | 0.00    | 0.00    | 0.00    | 0.00    | 0.00    | 0.00    |
| GT20       | 0.04     | 0.10     | 0.16     | 0.04     | 0.08     | 0.09    | 0.00    | 0.07    | 0.02    | 0.10    | 0.00    | 0.04    | 0.17    | 0.23    | 0.09    | 0.04    |
| PL9        | 0.01     | 0.10     | 0.02     | 0.01     | 0.01     | 0.13    | 0.08    | 0.08    | 0.09    | 0.05    | 0.12    | 0.07    | 0.08    | 0.10    | 0.17    | 0.03    |
| GH55       | 0.05     | 0.03     | 0.00     | 0.06     | 0.01     | 0.05    | 0.06    | 0.05    | 0.01    | 0.03    | 0.00    | 0.03    | 0.05    | 0.07    | 0.06    | 0.00    |
| GH64       | 0.00     | 0.00     | 0.00     | 0.00     | 0.00     | 0.00    | 0.00    | 0.00    | 0.00    | 0.00    | 0.00    | 0.00    | 0.00    | 0.00    | 0.00    | 0.00    |
| GH127      | 0.25     | 0.38     | 0.33     | 0.33     | 0.18     | 0.44    | 0.29    | 0.25    | 0.22    | 0.28    | 0.12    | 0.47    | 0.45    | 0.52    | 0.43    | 0.40    |
| GH103      | 0.00     | 0.02     | 0.00     | 0.01     | 0.03     | 0.00    | 0.00    | 0.00    | 0.00    | 0.00    | 0.00    | 0.01    | 0.00    | 0.00    | 0.00    | 0.00    |
| GH3        | 1.98     | 2.68     | 2.39     | 2.29     | 1.94     | 2.93    | 2.20    | 1.97    | 2.02    | 1.81    | 1.63    | 3.90    | 3.25    | 4.40    | 3.63    | 2.69    |
| GT45       | 0.00     | 0.00     | 0.00     | 0.00     | 0.00     | 0.00    | 0.00    | 0.00    | 0.00    | 0.00    | 0.00    | 0.00    | 0.00    | 0.00    | 0.00    | 0.00    |
| GT74       | 0.00     | 0.00     | 0.00     | 0.00     | 0.00     | 0.00    | 0.00    | 0.00    | 0.00    | 0.00    | 0.00    | 0.00    | 0.00    | 0.00    | 0.00    | 0.00    |
| GT90       | 0.00     | 0.00     | 0.00     | 0.00     | 0.00     | 0.00    | 0.00    | 0.00    | 0.00    | 0.00    | 0.00    | 0.00    | 0.02    | 0.00    | 0.00    | 0.00    |
| GH116      | 0.07     | 0.05     | 0.09     | 0.06     | 0.07     | 0.08    | 0.00    | 0.08    | 0.01    | 0.13    | 0.06    | 0.01    | 0.10    | 0.18    | 0.06    | 0.03    |
| GH31       | 1.01     | 1.20     | 1.07     | 0.84     | 0.69     | 1.16    | 0.61    | 0.81    | 0.83    | 0.83    | 0.80    | 1.39    | 1.22    | 1.93    | 1.56    | 1.06    |
| GT12       | 0.00     | 0.00     | 0.00     | 0.00     | 0.00     | 0.00    | 0.00    | 0.00    | 0.00    | 0.00    | 0.00    | 0.00    | 0.00    | 0.00    | 0.00    | 0.00    |
| CE1        | 0.24     | 0.48     | 0.40     | 0.33     | 0.25     | 0.53    | 0.31    | 0.33    | 0.36    | 0.41    | 0.40    | 0.43    | 0.44    | 0.49    | 0.48    | 0.39    |
| GH121      | 0.00     | 0.00     | 0.00     | 0.02     | 0.01     | 0.08    | 0.04    | 0.00    | 0.00    | 0.00    | 0.00    | 0.07    | 0.12    | 0.00    | 0.07    | 0.04    |
| GH79       | 0.00     | 0.00     | 0.00     | 0.01     | 0.00     | 0.00    | 0.02    | 0.00    | 0.00    | 0.00    | 0.00    | 0.00    | 0.03    | 0.02    | 0.00    | 0.00    |
| GT73       | 0.00     | 0.00     | 0.00     | 0.00     | 0.00     | 0.00    | 0.00    | 0.00    | 0.00    | 0.00    | 0.00    | 0.00    | 0.00    | 0.00    | 0.00    | 0.00    |
| GH77       | 0.70     | 0.62     | 0.51     | 0.61     | 0.61     | 1.01    | 0.90    | 0.42    | 0.53    | 0.39    | 0.65    | 1.07    | 0.80    | 0.85    | 1.19    | 1.00    |
| PL17       | 0.00     | 0.00     | 0.00     | 0.02     | 0.00     | 0.00    | 0.00    | 0.00    | 0.00    | 0.00    | 0.00    | 0.00    | 0.02    | 0.00    | 0.00    | 0.00    |
| PL8        | 0.15     | 0.14     | 0.25     | 0.14     | 0.13     | 0.09    | 0.00    | 0.03    | 0.13    | 0.21    | 0.03    | 0.18    | 0.25    | 0.28    | 0.23    | 0.06    |

## Normalized\_abundance\_2

| CAZY_group | ES-AD-35 | ES-AD-36 | ES-AD-37 | ES-AD-38 | ES-AD-39 | ES-AD-4 | ES-AD-5 | ES-AD-6 | ES-AD-7 | ES-AD-8 | ES-AD-9 | FR-AD-1 | FR-AD-2 | FR-AD-3 | FR-AD-4 | FR-AD-5 |
|------------|----------|----------|----------|----------|----------|---------|---------|---------|---------|---------|---------|---------|---------|---------|---------|---------|
| CE9        | 0.29     | 0.35     | 0.34     | 0.38     | 0.30     | 0.32    | 0.47    | 0.26    | 0.25    | 0.31    | 0.22    | 0.44    | 0.30    | 0.40    | 0.37    | 0.36    |
| CE15       | 0.00     | 0.00     | 0.02     | 0.02     | 0.03     | 0.02    | 0.00    | 0.00    | 0.00    | 0.03    | 0.00    | 0.00    | 0.02    | 0.07    | 0.03    | 0.01    |
| GT79       | 0.00     | 0.00     | 0.00     | 0.00     | 0.00     | 0.00    | 0.00    | 0.00    | 0.00    | 0.00    | 0.00    | 0.00    | 0.00    | 0.00    | 0.00    | 0.00    |
| GT10       | 0.00     | 0.00     | 0.00     | 0.02     | 0.00     | 0.02    | 0.00    | 0.00    | 0.00    | 0.00    | 0.00    | 0.01    | 0.00    | 0.02    | 0.03    | 0.00    |
| GH119      | 0.00     | 0.00     | 0.00     | 0.00     | 0.00     | 0.00    | 0.00    | 0.00    | 0.00    | 0.00    | 0.00    | 0.00    | 0.00    | 0.00    | 0.00    | 0.00    |
| GH16       | 0.12     | 0.13     | 0.40     | 0.12     | 0.13     | 0.18    | 0.08    | 0.07    | 0.11    | 0.16    | 0.09    | 0.16    | 0.20    | 0.42    | 0.17    | 0.19    |
| GH43       | 1.69     | 1.83     | 1.72     | 1.40     | 1.09     | 2.50    | 1.35    | 1.75    | 1.48    | 1.65    | 1.54    | 2.52    | 2.39    | 3.18    | 2.69    | 2.36    |
| GH51       | 0.53     | 0.50     | 0.47     | 0.47     | 0.37     | 0.68    | 0.29    | 0.42    | 0.42    | 0.36    | 0.31    | 0.78    | 0.64    | 0.57    | 0.80    | 0.58    |
| GT35       | 0.85     | 0.93     | 0.67     | 0.92     | 0.82     | 1.30    | 1.08    | 0.88    | 0.98    | 0.54    | 0.89    | 1.48    | 1.57    | 1.42    | 1.58    | 1.40    |
| GT25       | 0.01     | 0.02     | 0.00     | 0.00     | 0.00     | 0.00    | 0.00    | 0.00    | 0.01    | 0.00    | 0.00    | 0.00    | 0.00    | 0.00    | 0.00    | 0.00    |
| GT2        | 3.57     | 4.04     | 4.63     | 3.97     | 3.60     | 5.96    | 4.30    | 4.27    | 3.68    | 3.49    | 4.06    | 6.01    | 6.59    | 7.72    | 7.24    | 5.74    |
| GT51       | 0.79     | 0.86     | 1.19     | 0.79     | 0.66     | 1.06    | 0.94    | 0.83    | 0.72    | 0.88    | 1.08    | 1.11    | 0.95    | 1.00    | 1.29    | 0.95    |
| GH107      | 0.00     | 0.00     | 0.00     | 0.00     | 0.00     | 0.00    | 0.00    | 0.00    | 0.00    | 0.00    | 0.00    | 0.00    | 0.00    | 0.00    | 0.00    | 0.00    |
| GH7        | 0.00     | 0.00     | 0.00     | 0.00     | 0.00     | 0.00    | 0.00    | 0.00    | 0.00    | 0.00    | 0.00    | 0.00    | 0.00    | 0.00    | 0.00    | 0.00    |
| GT7        | 0.00     | 0.00     | 0.00     | 0.00     | 0.00     | 0.00    | 0.00    | 0.00    | 0.00    | 0.00    | 0.00    | 0.00    | 0.00    | 0.00    | 0.00    | 0.00    |
| GT36       | 0.00     | 0.00     | 0.00     | 0.00     | 0.00     | 0.00    | 0.00    | 0.00    | 0.00    | 0.00    | 0.00    | 0.00    | 0.00    | 0.00    | 0.00    | 0.00    |
| PL7        | 0.00     | 0.00     | 0.00     | 0.00     | 0.00     | 0.00    | 0.00    | 0.00    | 0.00    | 0.00    | 0.00    | 0.00    | 0.00    | 0.00    | 0.00    | 0.00    |
| GH110      | 0.12     | 0.10     | 0.25     | 0.10     | 0.06     | 0.16    | 0.04    | 0.11    | 0.10    | 0.13    | 0.00    | 0.13    | 0.15    | 0.30    | 0.16    | 0.06    |
| GT21       | 0.00     | 0.00     | 0.00     | 0.00     | 0.00     | 0.00    | 0.00    | 0.00    | 0.00    | 0.00    | 0.00    | 0.00    | 0.00    | 0.00    | 0.00    | 0.00    |
| GH62       | 0.00     | 0.00     | 0.00     | 0.00     | 0.00     | 0.00    | 0.00    | 0.00    | 0.01    | 0.00    | 0.00    | 0.00    | 0.00    | 0.00    | 0.00    | 0.00    |
| GH125      | 0.15     | 0.18     | 0.20     | 0.15     | 0.10     | 0.30    | 0.06    | 0.15    | 0.09    | 0.16    | 0.06    | 0.18    | 0.33    | 0.22    | 0.17    | 0.16    |
| GH117      | 0.08     | 0.08     | 0.09     | 0.05     | 0.06     | 0.08    | 0.02    | 0.04    | 0.08    | 0.10    | 0.00    | 0.09    | 0.12    | 0.22    | 0.09    | 0.01    |
| GH68       | 0.00     | 0.02     | 0.00     | 0.00     | 0.00     | 0.00    | 0.00    | 0.00    | 0.00    | 0.00    | 0.00    | 0.00    | 0.00    | 0.00    | 0.00    | 0.00    |
| GH85       | 0.00     | 0.05     | 0.00     | 0.01     | 0.00     | 0.03    | 0.02    | 0.00    | 0.03    | 0.13    | 0.03    | 0.06    | 0.02    | 0.00    | 0.01    | 0.00    |
| GH92       | 1.17     | 1.24     | 1.86     | 1.01     | 0.85     | 2.09    | 0.29    | 0.66    | 0.90    | 1.94    | 0.55    | 1.28    | 1.69    | 2.90    | 1.58    | 1.00    |
| GH40       | 0.00     | 0.00     | 0.00     | 0.00     | 0.00     | 0.00    | 0.00    | 0.00    | 0.00    | 0.00    | 0.00    | 0.00    | 0.00    | 0.00    | 0.00    | 0.00    |
| GT49       | 0.00     | 0.00     | 0.00     | 0.00     | 0.00     | 0.00    | 0.00    | 0.00    | 0.00    | 0.00    | 0.00    | 0.00    | 0.00    | 0.00    | 0.00    | 0.00    |
| GH112      | 0.17     | 0.18     | 0.13     | 0.13     | 0.11     | 0.29    | 0.24    | 0.04    | 0.13    | 0.10    | 0.15    | 0.31    | 0.42    | 0.18    | 0.16    | 0.26    |
| GT67       | 0.00     | 0.00     | 0.00     | 0.00     | 0.00     | 0.00    | 0.00    | 0.00    | 0.00    | 0.00    | 0.00    | 0.00    | 0.00    | 0.00    | 0.00    | 0.00    |
| CE8        | 0.11     | 0.26     | 0.11     | 0.10     | 0.10     | 0.24    | 0.22    | 0.15    | 0.15    | 0.10    | 0.28    | 0.18    | 0.17    | 0.40    | 0.18    | 0.26    |
| GT86       | 0.00     | 0.00     | 0.00     | 0.00     | 0.00     | 0.00    | 0.00    | 0.00    | 0.00    | 0.00    | 0.00    | 0.00    | 0.00    | 0.00    | 0.00    | 0.00    |
| GH101      | 0.00     | 0.00     | 0.00     | 0.04     | 0.01     | 0.07    | 0.06    | 0.00    | 0.00    | 0.00    | 0.00    | 0.09    | 0.03    | 0.07    | 0.04    | 0.03    |
| GH81       | 0.03     | 0.00     | 0.00     | 0.03     | 0.00     | 0.00    | 0.00    | 0.00    | 0.00    | 0.00    | 0.00    | 0.00    | 0.00    | 0.00    | 0.00    | 0.00    |
| GT93       | 0.00     | 0.00     | 0.00     | 0.00     | 0.00     | 0.00    | 0.00    | 0.00    | 0.00    | 0.00    | 0.00    | 0.00    | 0.00    | 0.00    | 0.00    | 0.00    |
| GT63       | 0.00     | 0.00     | 0.00     | 0.00     | 0.00     | 0.00    | 0.00    | 0.00    | 0.00    | 0.00    | 0.00    | 0.00    | 0.00    | 0.00    | 0.00    | 0.00    |
| CE11       | 0.19     | 0.21     | 0.29     | 0.24     | 0.16     | 0.20    | 0.14    | 0.29    | 0.20    | 0.23    | 0.34    | 0.17    | 0.22    | 0.37    | 0.21    | 0.20    |
| GT19       | 0.08     | 0.13     | 0.22     | 0.10     | 0.05     | 0.18    | 0.06    | 0.16    | 0.07    | 0.08    | 0.22    | 0.16    | 0.10    | 0.22    | 0.16    | 0.16    |
| GT33       | 0.00     | 0.00     | 0.00     | 0.00     | 0.00     | 0.00    | 0.00    | 0.00    | 0.00    | 0.00    | 0.00    | 0.00    | 0.00    | 0.00    | 0.00    | 0.00    |
| GH21       | 0.00     | 0.00     | 0.00     | 0.00     | 0.00     | 0.00    | 0.00    | 0.00    | 0.00    | 0.00    | 0.00    | 0.00    | 0.00    | 0.00    | 0.00    | 0.00    |
| GT68       | 0.00     | 0.00     | 0.00     | 0.00     | 0.00     | 0.00    | 0.00    | 0.00    | 0.00    | 0.00    | 0.00    | 0.00    | 0.00    | 0.00    | 0.00    | 0.00    |
| GH89       | 0.10     | 0.22     | 0.31     | 0.17     | 0.13     | 0.27    | 0.02    | 0.15    | 0.08    | 0.28    | 0.09    | 0.16    | 0.25    | 0.33    | 0.26    | 0.14    |
| GT82       | 0.00     | 0.00     | 0.00     | 0.00     | 0.01     | 0.00    | 0.00    | 0.00    | 0.00    | 0.00    | 0.00    | 0.00    | 0.00    | 0.02    | 0.00    | 0.00    |
| GH30       | 0.22     | 0.20     | 0.24     | 0.12     | 0.10     | 0.33    | 0.16    | 0.16    | 0.15    | 0.18    | 0.15    | 0.26    | 0.28    | 0.27    | 0.24    | 0.29    |
| GH20       | 0.93     | 1.13     | 1.79     | 1.01     | 0.77     | 1.49    | 0.35    | 0.67    | 0.54    | 1.27    | 0.49    | 0.78    | 1.32    | 2.16    | 1.19    | 0.65    |
| GH52       | 0.00     | 0.00     | 0.00     | 0.00     | 0.00     | 0.00    | 0.00    | 0.00    | 0.00    | 0.00    | 0.00    | 0.00    | 0.00    | 0.00    | 0.00    | 0.00    |
| GT84       | 0.03     | 0.00     | 0.00     | 0.02     | 0.04     | 0.08    | 0.06    | 0.00    | 0.01    | 0.08    | 0.06    | 0.06    | 0.03    | 0.02    | 0.01    | 0.04    |
| GT15       | 0.00     | 0.00     | 0.00     | 0.00     | 0.00     | 0.00    | 0.00    | 0.00    | 0.00    | 0.00    | 0.00    | 0.00    | 0.00    | 0.00    | 0.00    | 0.00    |
| GH93       | 0.00     | 0.00     | 0.00     | 0.00     | 0.00     | 0.02    | 0.00    | 0.00    | 0.00    | 0.00    | 0.00    | 0.00    | 0.02    | 0.00    | 0.00    | 0.00    |
| PL16       | 0.00     | 0.00     | 0.00     | 0.00     | 0.00     | 0.00    | 0.00    | 0.00    | 0.00    | 0.00    | 0.00    | 0.00    | 0.00    | 0.00    | 0.00    | 0.00    |
| GH26       | 0.10     | 0.17     | 0.04     | 0.12     | 0.09     | 0.15    | 0.00    | 0.16    | 0.11    | 0.05    | 0.12    | 0.16    | 0.17    | 0.18    | 0.16    | 0.03    |



## Normalized\_abundance\_2

| CAZY_group | ES-AD-35 | ES-AD-36 | ES-AD-37 | ES-AD-38 | ES-AD-39 | ES-AD-4 | ES-AD-5 | ES-AD-6 | ES-AD-7 | ES-AD-8 | ES-AD-9 | FR-AD-1 | FR-AD-2 | FR-AD-3 | FR-AD-4 | FR-AD-5 |
|------------|----------|----------|----------|----------|----------|---------|---------|---------|---------|---------|---------|---------|---------|---------|---------|---------|
| GT75       | 0.00     | 0.00     | 0.00     | 0.00     | 0.00     | 0.00    | 0.00    | 0.00    | 0.00    | 0.00    | 0.00    | 0.00    | 0.00    | 0.00    | 0.00    | 0.00    |
| GH53       | 0.22     | 0.09     | 0.04     | 0.14     | 0.04     | 0.14    | 0.06    | 0.04    | 0.18    | 0.10    | 0.22    | 0.16    | 0.05    | 0.17    | 0.10    | 0.07    |
| GT88       | 0.00     | 0.00     | 0.00     | 0.00     | 0.00     | 0.00    | 0.00    | 0.00    | 0.00    | 0.00    | 0.00    | 0.00    | 0.00    | 0.00    | 0.00    | 0.00    |
| GT24       | 0.00     | 0.00     | 0.00     | 0.00     | 0.00     | 0.00    | 0.00    | 0.00    | 0.00    | 0.00    | 0.00    | 0.00    | 0.00    | 0.00    | 0.00    | 0.00    |
| GT81       | 0.00     | 0.00     | 0.00     | 0.00     | 0.00     | 0.00    | 0.00    | 0.00    | 0.00    | 0.00    | 0.00    | 0.00    | 0.00    | 0.00    | 0.00    | 0.00    |
| GH4        | 0.10     | 0.16     | 0.24     | 0.13     | 0.21     | 0.13    | 0.29    | 0.07    | 0.09    | 0.05    | 0.09    | 0.24    | 0.13    | 0.12    | 0.26    | 0.17    |
| GT78       | 0.00     | 0.00     | 0.00     | 0.00     | 0.00     | 0.00    | 0.00    | 0.00    | 0.00    | 0.00    | 0.00    | 0.00    | 0.00    | 0.00    | 0.00    | 0.00    |
| GH8        | 0.09     | 0.07     | 0.02     | 0.06     | 0.02     | 0.04    | 0.04    | 0.08    | 0.13    | 0.00    | 0.06    | 0.10    | 0.07    | 0.13    | 0.11    | 0.06    |
| GH70       | 0.00     | 0.21     | 0.00     | 0.00     | 0.00     | 0.00    | 0.00    | 0.00    | 0.00    | 0.00    | 0.00    | 0.00    | 0.00    | 0.02    | 0.00    | 0.00    |
| GH122      | 0.00     | 0.00     | 0.00     | 0.00     | 0.00     | 0.00    | 0.00    | 0.00    | 0.00    | 0.00    | 0.00    | 0.00    | 0.00    | 0.00    | 0.00    | 0.00    |
| GH74       | 0.02     | 0.02     | 0.00     | 0.03     | 0.02     | 0.00    | 0.00    | 0.04    | 0.05    | 0.03    | 0.00    | 0.04    | 0.07    | 0.07    | 0.06    | 0.01    |
| GT41       | 0.01     | 0.01     | 0.00     | 0.00     | 0.00     | 0.01    | 0.00    | 0.01    | 0.01    | 0.01    | 0.00    | 0.06    | 0.00    | 0.02    | 0.02    | 0.00    |
| PL1        | 0.10     | 0.24     | 0.14     | 0.13     | 0.07     | 0.42    | 0.20    | 0.08    | 0.18    | 0.31    | 0.09    | 0.21    | 0.20    | 0.47    | 0.28    | 0.22    |
| GH15       | 0.04     | 0.07     | 0.04     | 0.03     | 0.03     | 0.08    | 0.00    | 0.01    | 0.02    | 0.08    | 0.00    | 0.01    | 0.08    | 0.20    | 0.04    | 0.00    |
| GH32       | 0.44     | 0.52     | 0.54     | 0.48     | 0.41     | 0.47    | 0.65    | 0.45    | 0.29    | 0.47    | 0.61    | 0.53    | 0.42    | 0.50    | 0.77    | 0.69    |
| GH44       | 0.00     | 0.00     | 0.00     | 0.02     | 0.00     | 0.02    | 0.00    | 0.00    | 0.00    | 0.00    | 0.00    | 0.00    | 0.00    | 0.00    | 0.00    | 0.00    |
| GT6        | 0.00     | 0.00     | 0.00     | 0.01     | 0.00     | 0.01    | 0.00    | 0.00    | 0.00    | 0.00    | 0.00    | 0.01    | 0.00    | 0.02    | 0.00    | 0.00    |
| GH13       | 3.07     | 3.54     | 2.57     | 3.62     | 3.13     | 3.63    | 3.87    | 2.72    | 3.30    | 2.46    | 3.04    | 4.69    | 3.55    | 4.17    | 4.47    | 3.83    |
| GT80       | 0.01     | 0.01     | 0.00     | 0.00     | 0.01     | 0.04    | 0.00    | 0.00    | 0.00    | 0.00    | 0.00    | 0.00    | 0.00    | 0.03    | 0.02    | 0.01    |
| GH71       | 0.00     | 0.00     | 0.00     | 0.00     | 0.00     | 0.00    | 0.00    | 0.00    | 0.00    | 0.00    | 0.00    | 0.00    | 0.00    | 0.00    | 0.00    | 0.00    |
| GH63       | 0.07     | 0.15     | 0.11     | 0.06     | 0.05     | 0.17    | 0.04    | 0.03    | 0.08    | 0.16    | 0.03    | 0.10    | 0.15    | 0.25    | 0.11    | 0.06    |
| PL21       | 0.01     | 0.00     | 0.00     | 0.03     | 0.01     | 0.00    | 0.00    | 0.00    | 0.01    | 0.03    | 0.00    | 0.01    | 0.02    | 0.00    | 0.06    | 0.00    |
| GH65       | 0.11     | 0.18     | 0.09     | 0.14     | 0.18     | 0.17    | 0.10    | 0.05    | 0.15    | 0.13    | 0.22    | 0.17    | 0.27    | 0.28    | 0.36    | 0.07    |
| CE4        | 0.61     | 0.84     | 0.63     | 0.67     | 0.73     | 0.63    | 0.92    | 0.56    | 0.72    | 0.52    | 0.52    | 0.57    | 0.64    | 0.57    | 0.67    | 0.61    |
| CE14       | 0.00     | 0.01     | 0.05     | 0.03     | 0.00     | 0.01    | 0.00    | 0.00    | 0.02    | 0.00    | 0.00    | 0.03    | 0.07    | 0.07    | 0.01    | 0.04    |
| GH115      | 0.26     | 0.29     | 0.20     | 0.17     | 0.08     | 0.26    | 0.00    | 0.08    | 0.27    | 0.10    | 0.06    | 0.33    | 0.08    | 0.33    | 0.28    | 0.12    |
| GH104      | 0.00     | 0.01     | 0.00     | 0.00     | 0.00     | 0.00    | 0.00    | 0.00    | 0.00    | 0.00    | 0.00    | 0.00    | 0.00    | 0.00    | 0.00    | 0.00    |
| GH111      | 0.00     | 0.00     | 0.00     | 0.00     | 0.00     | 0.00    | 0.00    | 0.00    | 0.00    | 0.00    | 0.00    | 0.00    | 0.00    | 0.00    | 0.00    | 0.00    |
| GH95       | 0.34     | 0.64     | 0.60     | 0.31     | 0.30     | 0.71    | 0.31    | 0.49    | 0.33    | 0.70    | 0.34    | 0.51    | 0.65    | 1.11    | 0.74    | 0.56    |
| GT70       | 0.00     | 0.00     | 0.00     | 0.00     | 0.00     | 0.00    | 0.00    | 0.00    | 0.00    | 0.00    | 0.00    | 0.00    | 0.00    | 0.00    | 0.00    | 0.00    |
| CE10       | 0.09     | 0.14     | 0.22     | 0.13     | 0.10     | 0.27    | 0.14    | 0.10    | 0.12    | 0.10    | 0.03    | 0.18    | 0.12    | 0.32    | 0.20    | 0.06    |
| GH10       | 0.09     | 0.10     | 0.05     | 0.09     | 0.05     | 0.13    | 0.00    | 0.08    | 0.18    | 0.03    | 0.15    | 0.20    | 0.13    | 0.17    | 0.09    | 0.14    |
| GH130      | 0.24     | 0.32     | 0.25     | 0.20     | 0.21     | 0.50    | 0.12    | 0.22    | 0.27    | 0.26    | 0.25    | 0.43    | 0.35    | 0.44    | 0.41    | 0.23    |
| PL20       | 0.00     | 0.00     | 0.00     | 0.00     | 0.00     | 0.00    | 0.00    | 0.00    | 0.00    | 0.00    | 0.00    | 0.00    | 0.00    | 0.00    | 0.00    | 0.00    |
| GH69       | 0.00     | 0.00     | 0.00     | 0.00     | 0.00     | 0.00    | 0.00    | 0.00    | 0.00    | 0.00    | 0.00    | 0.00    | 0.00    | 0.00    | 0.00    | 0.00    |
| PL2        | 0.00     | 0.00     | 0.00     | 0.00     | 0.00     | 0.00    | 0.00    | 0.00    | 0.00    | 0.00    | 0.00    | 0.00    | 0.00    | 0.00    | 0.00    | 0.00    |
| GH49       | 0.00     | 0.00     | 0.00     | 0.00     | 0.00     | 0.00    | 0.00    | 0.00    | 0.00    | 0.00    | 0.00    | 0.00    | 0.00    | 0.00    | 0.00    | 0.00    |
| GH25       | 0.28     | 0.47     | 0.43     | 0.41     | 0.25     | 0.28    | 0.75    | 0.49    | 0.45    | 0.36    | 0.92    | 0.64    | 0.42    | 0.33    | 0.61    | 0.30    |
| GH59       | 0.00     | 0.06     | 0.00     | 0.02     | 0.00     | 0.06    | 0.00    | 0.01    | 0.07    | 0.00    | 0.03    | 0.09    | 0.02    | 0.03    | 0.01    | 0.03    |
| GH35       | 0.29     | 0.30     | 0.56     | 0.30     | 0.23     | 0.30    | 0.12    | 0.23    | 0.25    | 0.28    | 0.03    | 0.38    | 0.38    | 0.67    | 0.48    | 0.25    |
| GT39       | 0.00     | 0.00     | 0.00     | 0.00     | 0.01     | 0.02    | 0.00    | 0.00    | 0.01    | 0.00    | 0.00    | 0.04    | 0.05    | 0.02    | 0.01    | 0.01    |
| GT57       | 0.00     | 0.00     | 0.00     | 0.00     | 0.00     | 0.00    | 0.00    | 0.00    | 0.00    | 0.00    | 0.00    | 0.00    | 0.00    | 0.00    | 0.00    | 0.00    |
| GH129      | 0.01     | 0.00     | 0.00     | 0.03     | 0.04     | 0.01    | 0.00    | 0.01    | 0.01    | 0.00    | 0.00    | 0.03    | 0.02    | 0.00    | 0.06    | 0.01    |
| GT22       | 0.00     | 0.00     | 0.00     | 0.00     | 0.00     | 0.01    | 0.00    | 0.00    | 0.00    | 0.00    | 0.00    | 0.00    | 0.00    | 0.00    | 0.00    | 0.00    |
| PL12       | 0.03     | 0.05     | 0.00     | 0.03     | 0.03     | 0.11    | 0.00    | 0.04    | 0.03    | 0.18    | 0.00    | 0.01    | 0.10    | 0.10    | 0.14    | 0.06    |
| PL18       | 0.00     | 0.00     | 0.00     | 0.00     | 0.00     | 0.00    | 0.00    | 0.00    | 0.00    | 0.00    | 0.00    | 0.00    | 0.00    | 0.00    | 0.00    | 0.00    |
| GT92       | 0.00     | 0.00     | 0.00     | 0.00     | 0.00     | 0.00    | 0.00    | 0.00    | 0.00    | 0.00    | 0.00    | 0.00    | 0.00    | 0.00    | 0.00    | 0.00    |
| GT44       | 0.00     | 0.00     | 0.00     | 0.01     | 0.00     | 0.00    | 0.00    | 0.00    | 0.00    | 0.00    | 0.00    | 0.00    | 0.00    | 0.00    | 0.00    | 0.00    |
| GT29       | 0.00     | 0.00     | 0.00     | 0.00     | 0.00     | 0.00    | 0.00    | 0.00    | 0.00    | 0.00    | 0.00    | 0.00    | 0.00    | 0.00    | 0.00    | 0.00    |
| GT13       | 0.00     | 0.00     | 0.00     | 0.00     | 0.00     | 0.00    | 0.00    | 0.00    | 0.00    | 0.00    | 0.00    | 0.00    | 0.00    | 0.00    | 0.00    | 0.00    |

Normalized\_abundance\_2

| CAZY_group | ES-AD-35 | ES-AD-36 | ES-AD-37 | ES-AD-38 | ES-AD-39 | ES-AD-4 | ES-AD-5 | ES-AD-6 | ES-AD-7 | ES-AD-8 | ES-AD-9 | FR-AD-1 | FR-AD-2 | FR-AD-3 | FR-AD-4 | FR-AD-5 |
|------------|----------|----------|----------|----------|----------|---------|---------|---------|---------|---------|---------|---------|---------|---------|---------|---------|
| GT52       | 0.00     | 0.00     | 0.00     | 0.00     | 0.00     | 0.00    | 0.00    | 0.00    | 0.00    | 0.00    | 0.00    | 0.00    | 0.00    | 0.00    | 0.00    | 0.00    |
| GT64       | 0.00     | 0.00     | 0.00     | 0.00     | 0.00     | 0.00    | 0.00    | 0.00    | 0.00    | 0.00    | 0.00    | 0.00    | 0.00    | 0.00    | 0.00    | 0.00    |
| GT85       | 0.00     | 0.00     | 0.00     | 0.00     | 0.00     | 0.00    | 0.00    | 0.00    | 0.00    | 0.00    | 0.00    | 0.00    | 0.00    | 0.00    | 0.00    | 0.00    |
| GT16       | 0.00     | 0.00     | 0.00     | 0.00     | 0.00     | 0.00    | 0.00    | 0.00    | 0.00    | 0.00    | 0.00    | 0.00    | 0.00    | 0.00    | 0.00    | 0.00    |
| GH56       | 0.00     | 0.00     | 0.00     | 0.00     | 0.00     | 0.00    | 0.00    | 0.00    | 0.00    | 0.00    | 0.00    | 0.00    | 0.00    | 0.00    | 0.00    | 0.00    |
| GT60       | 0.00     | 0.00     | 0.00     | 0.00     | 0.00     | 0.00    | 0.00    | 0.00    | 0.00    | 0.00    | 0.00    | 0.00    | 0.00    | 0.00    | 0.00    | 0.00    |
| GH41       | 0.00     | 0.00     | 0.00     | 0.00     | 0.00     | 0.00    | 0.00    | 0.00    | 0.00    | 0.00    | 0.00    | 0.00    | 0.00    | 0.00    | 0.00    | 0.00    |
| CE7        | 0.05     | 0.14     | 0.09     | 0.04     | 0.08     | 0.11    | 0.10    | 0.07    | 0.08    | 0.13    | 0.09    | 0.13    | 0.10    | 0.20    | 0.06    | 0.04    |
| GH39       | 0.05     | 0.06     | 0.00     | 0.02     | 0.02     | 0.02    | 0.02    | 0.01    | 0.07    | 0.05    | 0.09    | 0.06    | 0.08    | 0.07    | 0.09    | 0.04    |
| GT30       | 0.25     | 0.26     | 0.38     | 0.19     | 0.19     | 0.30    | 0.12    | 0.19    | 0.14    | 0.26    | 0.12    | 0.24    | 0.35    | 0.50    | 0.21    | 0.33    |
| PL15       | 0.02     | 0.02     | 0.00     | 0.04     | 0.05     | 0.03    | 0.00    | 0.05    | 0.02    | 0.05    | 0.00    | 0.04    | 0.13    | 0.02    | 0.16    | 0.01    |
| GH102      | 0.01     | 0.08     | 0.02     | 0.00     | 0.01     | 0.03    | 0.02    | 0.01    | 0.01    | 0.00    | 0.00    | 0.10    | 0.03    | 0.12    | 0.10    | 0.06    |

## Normalized\_abundance\_2

| CAZY_group | FR-AD-6 | FR-AD-7 | FR-AD-8 | IN-CH-15 | IN-CH-14 | IN-CH-13 | IT-AD-1 | IT-AD-2 | IT-AD-3 | IT-AD-4 | IT-AD-5 | IT-AD-6 | JP-AD-1 | JP-AD-2 | JP-AD-3 | JP-AD-4 |  |  |
|------------|---------|---------|---------|----------|----------|----------|---------|---------|---------|---------|---------|---------|---------|---------|---------|---------|--|--|
| GH29       | 0.77    | 0.70    | 0.75    | 1.00     | 1.66     | 0.62     | 0.86    | 0.49    | 0.93    | 0.37    | 0.80    | 0.63    | 0.57    | 0.72    | 0.37    | 0.72    |  |  |
| PL4        | 0.00    | 0.00    | 0.00    | 0.00     | 0.00     | 0.00     | 0.00    | 0.00    | 0.00    | 0.00    | 0.00    | 0.00    | 0.00    | 0.00    | 0.00    | 0.00    |  |  |
| GH23       | 1.78    | 2.00    | 1.74    | 1.72     | 2.09     | 0.65     | 2.32    | 2.14    | 2.42    | 1.94    | 2.00    | 2.10    | 1.44    | 1.73    | 1.47    | 1.71    |  |  |
| CE6        | 0.10    | 0.03    | 0.02    | 0.45     | 0.21     | 0.12     | 0.00    | 0.00    | 0.00    | 0.05    | 0.02    | 0.08    | 0.03    | 0.00    | 0.02    | 0.05    |  |  |
| GH72       | 0.16    | 0.20    | 0.22    | 0.34     | 0.48     | 0.05     | 0.14    | 0.16    | 0.16    | 0.16    | 0.15    | 0.22    | 0.03    | 0.17    | 0.16    | 0.24    |  |  |
| GH114      | 0.00    | 0.00    | 0.00    | 0.00     | 0.00     | 0.00     | 0.00    | 0.00    | 0.00    | 0.00    | 0.00    | 0.00    | 0.00    | 0.00    | 0.00    | 0.00    |  |  |
| GH78       | 0.45    | 0.99    | 1.20    | 0.40     | 2.01     | 0.11     | 0.99    | 0.60    | 0.92    | 0.21    | 0.79    | 0.76    | 1.01    | 0.42    | 0.80    | 0.83    |  |  |
| PL19       | 0.00    | 0.00    | 0.00    | 0.00     | 0.00     | 0.00     | 0.00    | 0.00    | 0.00    | 0.00    | 0.00    | 0.00    | 0.00    | 0.00    | 0.00    | 0.00    |  |  |
| GT27       | 0.00    | 0.00    | 0.00    | 0.00     | 0.02     | 0.00     | 0.00    | 0.00    | 0.00    | 0.00    | 0.00    | 0.00    | 0.00    | 0.00    | 0.00    | 0.00    |  |  |
| GH5        | 0.66    | 0.87    | 0.92    | 0.79     | 0.68     | 0.56     | 0.27    | 0.34    | 0.56    | 0.50    | 0.38    | 0.43    | 0.24    | 0.20    | 0.33    | 0.40    |  |  |
| GT40       | 0.00    | 0.00    | 0.00    | 0.00     | 0.00     | 0.00     | 0.00    | 0.00    | 0.00    | 0.00    | 0.00    | 0.00    | 0.00    | 0.00    | 0.00    | 0.00    |  |  |
| CE13       | 0.00    | 0.00    | 0.00    | 0.00     | 0.00     | 0.00     | 0.00    | 0.00    | 0.00    | 0.00    | 0.00    | 0.00    | 0.00    | 0.00    | 0.00    | 0.00    |  |  |
| GT37       | 0.00    | 0.00    | 0.00    | 0.00     | 0.00     | 0.00     | 0.00    | 0.00    | 0.00    | 0.00    | 0.00    | 0.00    | 0.00    | 0.00    | 0.00    | 0.00    |  |  |
| GH33       | 0.06    | 0.34    | 0.20    | 0.19     | 0.39     | 0.12     | 0.39    | 0.16    | 0.20    | 0.24    | 0.29    | 0.31    | 0.19    | 0.10    | 0.16    | 0.13    |  |  |
| GT65       | 0.00    | 0.00    | 0.00    | 0.00     | 0.00     | 0.00     | 0.00    | 0.00    | 0.00    | 0.00    | 0.00    | 0.00    | 0.00    | 0.00    | 0.00    | 0.00    |  |  |
| GH86       | 0.00    | 0.02    | 0.00    | 0.00     | 0.00     | 0.00     | 0.00    | 0.00    | 0.00    | 0.00    | 0.00    | 0.00    | 0.03    | 0.02    | 0.00    | 0.00    |  |  |
| GH123      | 0.05    | 0.08    | 0.27    | 0.19     | 0.27     | 0.12     | 0.21    | 0.09    | 0.16    | 0.03    | 0.14    | 0.05    | 0.08    | 0.07    | 0.05    | 0.13    |  |  |
| GH96       | 0.00    | 0.00    | 0.00    | 0.00     | 0.00     | 0.00     | 0.00    | 0.00    | 0.00    | 0.00    | 0.00    | 0.00    | 0.00    | 0.00    | 0.00    | 0.00    |  |  |
| GH14       | 0.00    | 0.00    | 0.00    | 0.00     | 0.00     | 0.00     | 0.00    | 0.00    | 0.00    | 0.00    | 0.00    | 0.00    | 0.00    | 0.00    | 0.00    | 0.00    |  |  |
| CE3        | 0.00    | 0.00    | 0.00    | 0.00     | 0.00     | 0.00     | 0.00    | 0.00    | 0.00    | 0.00    | 0.00    | 0.00    | 0.00    | 0.00    | 0.00    | 0.00    |  |  |
| PL10       | 0.14    | 0.02    | 0.12    | 0.32     | 0.29     | 0.12     | 0.23    | 0.00    | 0.02    | 0.05    | 0.11    | 0.05    | 0.16    | 0.05    | 0.07    | 0.11    |  |  |
| GT48       | 0.00    | 0.00    | 0.00    | 0.00     | 0.00     | 0.00     | 0.00    | 0.00    | 0.00    | 0.00    | 0.00    | 0.00    | 0.00    | 0.00    | 0.00    | 0.00    |  |  |
| PL6        | 0.00    | 0.00    | 0.00    | 0.00     | 0.00     | 0.00     | 0.00    | 0.00    | 0.00    | 0.00    | 0.00    | 0.00    | 0.00    | 0.00    | 0.00    | 0.00    |  |  |
| GT83       | 0.08    | 0.00    | 0.15    | 0.32     | 0.29     | 0.11     | 0.10    | 0.09    | 0.14    | 0.08    | 0.17    | 0.08    | 0.16    | 0.15    | 0.23    | 0.16    |  |  |
| GH126      | 0.00    | 0.00    | 0.00    | 0.00     | 0.00     | 0.00     | 0.00    | 0.00    | 0.00    | 0.00    | 0.00    | 0.00    | 0.00    | 0.00    | 0.00    | 0.00    |  |  |
| GH9        | 0.42    | 0.29    | 0.28    | 0.05     | 0.12     | 0.02     | 0.12    | 0.11    | 0.28    | 0.11    | 0.21    | 0.23    | 0.27    | 0.15    | 0.19    | 0.05    |  |  |
| GH75       | 0.00    | 0.00    | 0.00    | 0.00     | 0.00     | 0.00     | 0.00    | 0.00    | 0.00    | 0.00    | 0.00    | 0.00    | 0.00    | 0.00    | 0.00    | 0.00    |  |  |
| GT71       | 0.00    | 0.00    | 0.00    | 0.00     | 0.00     | 0.00     | 0.00    | 0.00    | 0.00    | 0.00    | 0.00    | 0.00    | 0.00    | 0.00    | 0.00    | 0.00    |  |  |
| GH46       | 0.00    | 0.00    | 0.02    | 0.00     | 0.00     | 0.00     | 0.00    | 0.00    | 0.05    | 0.00    | 0.00    | 0.00    | 0.00    | 0.00    | 0.00    | 0.00    |  |  |
| GT61       | 0.00    | 0.00    | 0.00    | 0.00     | 0.00     | 0.00     | 0.00    | 0.00    | 0.00    | 0.00    | 0.00    | 0.00    | 0.00    | 0.00    | 0.00    | 0.00    |  |  |
| GT3        | 0.21    | 0.22    | 0.10    | 0.61     | 0.43     | 0.30     | 0.27    | 0.20    | 0.28    | 0.00    | 0.27    | 0.22    | 0.19    | 0.15    | 0.16    | 0.27    |  |  |
| PL3        | 0.00    | 0.00    | 0.00    | 0.00     | 0.00     | 0.00     | 0.00    | 0.00    | 0.00    | 0.00    | 0.00    | 0.00    | 0.00    | 0.00    | 0.00    | 0.00    |  |  |
| GH108      | 0.00    | 0.02    | 0.00    | 0.00     | 0.04     | 0.04     | 0.04    | 0.02    | 0.02    | 0.00    | 0.02    | 0.05    | 0.03    | 0.07    | 0.02    | 0.03    |  |  |
| GT56       | 0.00    | 0.00    | 0.00    | 0.03     | 0.02     | 0.00     | 0.02    | 0.04    | 0.03    | 0.00    | 0.02    | 0.00    | 0.00    | 0.00    | 0.02    | 0.00    |  |  |
| PL11       | 0.05    | 0.20    | 0.13    | 0.11     | 0.33     | 0.00     | 0.12    | 0.02    | 0.14    | 0.11    | 0.05    | 0.11    | 0.24    | 0.10    | 0.07    | 0.24    |  |  |
| GH45       | 0.00    | 0.00    | 0.00    | 0.00     | 0.00     | 0.00     | 0.00    | 0.00    | 0.00    | 0.00    | 0.00    | 0.00    | 0.00    | 0.00    | 0.00    | 0.00    |  |  |
| GT34       | 0.00    | 0.00    | 0.00    | 0.03     | 0.00     | 0.00     | 0.00    | 0.00    | 0.00    | 0.00    | 0.00    | 0.00    | 0.00    | 0.00    | 0.00    | 0.03    |  |  |
| PL14       | 0.00    | 0.00    | 0.00    | 0.00     | 0.00     | 0.00     | 0.00    | 0.00    | 0.00    | 0.00    | 0.00    | 0.00    | 0.00    | 0.00    | 0.00    | 0.00    |  |  |
| GH19       | 0.00    | 0.02    | 0.00    | 0.03     | 0.02     | 0.04     | 0.00    | 0.02    | 0.00    | 0.00    | 0.00    | 0.02    | 0.00    | 0.00    | 0.05    | 0.03    |  |  |
| GH118      | 0.00    | 0.00    | 0.00    | 0.00     | 0.00     | 0.00     | 0.00    | 0.00    | 0.00    | 0.00    | 0.00    | 0.00    | 0.00    | 0.00    | 0.00    | 0.00    |  |  |
| GH82       | 0.00    | 0.00    | 0.00    | 0.00     | 0.00     | 0.00     | 0.00    | 0.00    | 0.00    | 0.00    | 0.00    | 0.00    | 0.00    | 0.00    | 0.00    | 0.00    |  |  |
| GH76       | 0.03    | 0.22    | 0.05    | 0.00     | 0.39     | 0.00     | 0.08    | 0.05    | 0.19    | 0.11    | 0.08    | 0.05    | 0.11    | 0.20    | 0.02    | 0.08    |  |  |
| GT4        | 2.34    | 2.57    | 2.94    | 3.36     | 3.85     | 1.42     | 2.20    | 1.70    | 2.65    | 2.76    | 1.71    | 2.37    | 2.42    | 1.39    | 1.94    | 2.20    |  |  |
| GT87       | 0.02    | 0.02    | 0.00    | 0.00     | 0.06     | 0.00     | 0.00    | 0.02    | 0.00    | 0.00    | 0.03    | 0.00    | 0.03    | 0.00    | 0.00    | 0.03    |  |  |
| GH24       | 0.14    | 0.12    | 0.23    | 0.37     | 0.23     | 0.37     | 0.33    | 0.13    | 0.26    | 0.32    | 0.14    | 0.05    | 0.19    | 0.07    | 0.23    | 0.13    |  |  |
| GH90       | 0.00    | 0.00    | 0.00    | 0.00     | 0.02     | 0.00     | 0.00    | 0.00    | 0.00    | 0.00    | 0.00    | 0.00    | 0.00    | 0.00    | 0.00    | 0.00    |  |  |
| GH57       | 0.11    | 0.13    | 0.18    | 0.58     | 0.23     | 0.21     | 0.06    | 0.11    | 0.19    | 0.03    | 0.12    | 0.22    | 0.11    | 0.07    | 0.12    | 0.21    |  |  |
| GH36       | 0.98    | 1.34    | 0.92    | 1.72     | 1.30     | 0.83     | 0.88    | 0.62    | 1.03    | 0.87    | 0.85    | 0.99    | 0.73    | 0.72    | 0.61    | 0.64    |  |  |
| GT46       | 0.00    | 0.00    | 0.00    | 0.00     | 0.00     | 0.00     | 0.00    | 0.00    | 0.00    | 0.00    | 0.00    | 0.00    | 0.00    | 0.00    | 0.00    | 0.00    |  |  |
| GH66       | 0.05    | 0.03    | 0.03    | 0.21     | 0.17     | 0.04     | 0.04    | 0.02    | 0.03    | 0.21    | 0.06    | 0.02    | 0.05    | 0.02    | 0.09    | 0.00    |  |  |

## Normalized\_abundance\_2

| CAZY_group | FR-AD-6 | FR-AD-7 | FR-AD-8 | IN-CH-15 | IN-CH-14 | IN-CH-13 | IT-AD-1 | IT-AD-2 | IT-AD-3 | IT-AD-4 | IT-AD-5 | IT-AD-6 | JP-AD-1 | JP-AD-2 | JP-AD-3 | JP-AD-4 |
|------------|---------|---------|---------|----------|----------|----------|---------|---------|---------|---------|---------|---------|---------|---------|---------|---------|
| GH48       | 0.00    | 0.00    | 0.00    | 0.00     | 0.00     | 0.00     | 0.00    | 0.00    | 0.00    | 0.00    | 0.00    | 0.00    | 0.00    | 0.00    | 0.00    | 0.00    |
| GT53       | 0.00    | 0.00    | 0.00    | 0.00     | 0.00     | 0.00     | 0.00    | 0.00    | 0.00    | 0.00    | 0.00    | 0.00    | 0.00    | 0.00    | 0.00    | 0.00    |
| GH60       | 0.00    | 0.00    | 0.00    | 0.00     | 0.00     | 0.00     | 0.00    | 0.00    | 0.00    | 0.00    | 0.00    | 0.00    | 0.00    | 0.00    | 0.00    | 0.00    |
| GT31       | 0.00    | 0.00    | 0.00    | 0.03     | 0.02     | 0.00     | 0.00    | 0.00    | 0.00    | 0.00    | 0.00    | 0.00    | 0.02    | 0.00    | 0.00    | 0.00    |
| GH105      | 0.42    | 0.62    | 0.65    | 0.63     | 1.20     | 0.12     | 0.58    | 0.24    | 0.79    | 0.32    | 0.36    | 0.42    | 0.79    | 0.32    | 0.49    | 0.62    |
| GT23       | 0.00    | 0.00    | 0.02    | 0.00     | 0.00     | 0.00     | 0.00    | 0.00    | 0.02    | 0.03    | 0.00    | 0.03    | 0.08    | 0.00    | 0.00    | 0.00    |
| GH11       | 0.00    | 0.02    | 0.00    | 0.00     | 0.00     | 0.00     | 0.00    | 0.00    | 0.00    | 0.00    | 0.00    | 0.00    | 0.00    | 0.00    | 0.00    | 0.03    |
| GT38       | 0.00    | 0.00    | 0.00    | 0.00     | 0.00     | 0.00     | 0.00    | 0.00    | 0.00    | 0.00    | 0.00    | 0.00    | 0.00    | 0.00    | 0.00    | 0.00    |
| GT43       | 0.00    | 0.00    | 0.00    | 0.00     | 0.00     | 0.00     | 0.00    | 0.00    | 0.00    | 0.00    | 0.00    | 0.00    | 0.00    | 0.00    | 0.00    | 0.00    |
| GH99       | 0.00    | 0.00    | 0.00    | 0.03     | 0.00     | 0.00     | 0.00    | 0.00    | 0.00    | 0.00    | 0.00    | 0.00    | 0.00    | 0.00    | 0.00    | 0.00    |
| GH38       | 0.32    | 0.55    | 0.37    | 0.26     | 0.41     | 0.00     | 0.25    | 0.40    | 0.45    | 0.16    | 0.47    | 0.35    | 0.24    | 0.45    | 0.26    | 0.37    |
| GH109      | 0.16    | 0.17    | 0.52    | 0.34     | 0.50     | 0.35     | 0.49    | 0.29    | 0.37    | 0.16    | 0.23    | 0.32    | 0.52    | 0.07    | 0.09    | 0.48    |
| GH2        | 4.34    | 6.05    | 5.33    | 9.39     | 11.10    | 2.27     | 4.39    | 3.33    | 4.83    | 4.06    | 3.67    | 4.41    | 4.84    | 3.12    | 4.45    | 4.87    |
| GT28       | 0.42    | 0.57    | 0.57    | 0.82     | 0.54     | 0.39     | 0.68    | 0.87    | 0.62    | 0.64    | 0.58    | 0.68    | 0.49    | 0.49    | 0.49    | 0.54    |
| GH42       | 0.32    | 0.32    | 0.37    | 0.03     | 0.14     | 0.07     | 0.33    | 0.38    | 0.39    | 0.27    | 0.38    | 0.23    | 0.33    | 0.20    | 0.42    | 0.46    |
| GT58       | 0.00    | 0.00    | 0.00    | 0.00     | 0.00     | 0.00     | 0.00    | 0.00    | 0.00    | 0.00    | 0.00    | 0.00    | 0.00    | 0.00    | 0.00    | 0.00    |
| GH61       | 0.00    | 0.00    | 0.00    | 0.00     | 0.00     | 0.00     | 0.00    | 0.00    | 0.00    | 0.00    | 0.00    | 0.00    | 0.00    | 0.00    | 0.00    | 0.00    |
| GH80       | 0.00    | 0.00    | 0.00    | 0.00     | 0.00     | 0.00     | 0.00    | 0.00    | 0.00    | 0.00    | 0.00    | 0.00    | 0.00    | 0.00    | 0.00    | 0.00    |
| GH98       | 0.02    | 0.00    | 0.00    | 0.00     | 0.00     | 0.00     | 0.00    | 0.00    | 0.00    | 0.00    | 0.00    | 0.00    | 0.00    | 0.00    | 0.00    | 0.00    |
| GH6        | 0.00    | 0.00    | 0.00    | 0.00     | 0.00     | 0.00     | 0.00    | 0.00    | 0.00    | 0.00    | 0.00    | 0.00    | 0.00    | 0.00    | 0.00    | 0.00    |
| GT1        | 0.13    | 0.12    | 0.12    | 0.00     | 0.12     | 0.02     | 0.06    | 0.02    | 0.08    | 0.27    | 0.08    | 0.03    | 0.00    | 0.05    | 0.07    | 0.08    |
| GH28       | 1.09    | 0.87    | 0.78    | 1.16     | 1.74     | 0.49     | 0.70    | 0.43    | 0.86    | 0.45    | 0.58    | 0.71    | 0.79    | 0.54    | 0.82    | 0.99    |
| GT42       | 0.00    | 0.00    | 0.00    | 0.00     | 0.00     | 0.00     | 0.00    | 0.00    | 0.00    | 0.00    | 0.00    | 0.00    | 0.00    | 0.00    | 0.00    | 0.00    |
| GH128      | 0.00    | 0.00    | 0.00    | 0.03     | 0.00     | 0.00     | 0.00    | 0.00    | 0.00    | 0.00    | 0.00    | 0.00    | 0.00    | 0.00    | 0.00    | 0.00    |
| CE12       | 0.16    | 0.08    | 0.10    | 0.24     | 0.23     | 0.12     | 0.06    | 0.02    | 0.08    | 0.05    | 0.06    | 0.08    | 0.08    | 0.10    | 0.05    | 0.08    |
| CE16       | 0.00    | 0.00    | 0.00    | 0.00     | 0.00     | 0.00     | 0.00    | 0.00    | 0.00    | 0.00    | 0.00    | 0.00    | 0.00    | 0.00    | 0.00    | 0.00    |
| GT89       | 0.00    | 0.00    | 0.00    | 0.00     | 0.00     | 0.00     | 0.00    | 0.00    | 0.00    | 0.00    | 0.00    | 0.00    | 0.00    | 0.00    | 0.00    | 0.00    |
| GT11       | 0.08    | 0.03    | 0.10    | 0.05     | 0.14     | 0.05     | 0.04    | 0.04    | 0.09    | 0.00    | 0.02    | 0.03    | 0.08    | 0.05    | 0.00    | 0.03    |
| GT77       | 0.02    | 0.02    | 0.00    | 0.11     | 0.12     | 0.07     | 0.08    | 0.51    | 0.00    | 0.00    | 0.08    | 0.00    | 0.00    | 0.00    | 0.02    | 0.00    |
| GT55       | 0.00    | 0.00    | 0.00    | 0.00     | 0.00     | 0.00     | 0.00    | 0.00    | 0.00    | 0.00    | 0.00    | 0.00    | 0.00    | 0.00    | 0.00    | 0.00    |
| GT18       | 0.00    | 0.00    | 0.00    | 0.00     | 0.00     | 0.00     | 0.00    | 0.00    | 0.00    | 0.00    | 0.00    | 0.00    | 0.00    | 0.00    | 0.00    | 0.00    |
| GH87       | 0.03    | 0.00    | 0.02    | 0.11     | 0.00     | 0.00     | 0.00    | 0.00    | 0.03    | 0.05    | 0.00    | 0.00    | 0.00    | 0.02    | 0.00    | 0.05    |
| PL5        | 0.00    | 0.00    | 0.00    | 0.00     | 0.00     | 0.00     | 0.00    | 0.00    | 0.00    | 0.00    | 0.00    | 0.00    | 0.00    | 0.00    | 0.02    | 0.00    |
| GH22       | 0.00    | 0.00    | 0.00    | 0.00     | 0.00     | 0.00     | 0.00    | 0.00    | 0.00    | 0.00    | 0.00    | 0.00    | 0.00    | 0.00    | 0.00    | 0.00    |
| CE2        | 0.05    | 0.15    | 0.05    | 0.11     | 0.04     | 0.05     | 0.06    | 0.07    | 0.08    | 0.05    | 0.05    | 0.06    | 0.00    | 0.02    | 0.09    | 0.05    |
| GH120      | 0.06    | 0.12    | 0.10    | 0.00     | 0.02     | 0.00     | 0.12    | 0.07    | 0.14    | 0.13    | 0.05    | 0.08    | 0.00    | 0.07    | 0.07    | 0.00    |
| GH73       | 0.69    | 0.70    | 0.72    | 0.79     | 0.60     | 0.40     | 0.57    | 0.29    | 0.56    | 0.64    | 0.47    | 0.25    | 0.57    | 0.37    | 0.49    | 0.43    |
| GT17       | 0.00    | 0.00    | 0.00    | 0.03     | 0.00     | 0.00     | 0.00    | 0.00    | 0.00    | 0.00    | 0.00    | 0.00    | 0.00    | 0.00    | 0.00    | 0.00    |
| GH124      | 0.00    | 0.00    | 0.00    | 0.00     | 0.00     | 0.00     | 0.00    | 0.00    | 0.00    | 0.00    | 0.00    | 0.00    | 0.00    | 0.00    | 0.00    | 0.00    |
| GH54       | 0.00    | 0.00    | 0.00    | 0.00     | 0.00     | 0.00     | 0.00    | 0.00    | 0.00    | 0.00    | 0.00    | 0.00    | 0.00    | 0.00    | 0.00    | 0.00    |
| GH100      | 0.00    | 0.00    | 0.00    | 0.00     | 0.00     | 0.00     | 0.00    | 0.00    | 0.00    | 0.00    | 0.00    | 0.00    | 0.00    | 0.00    | 0.00    | 0.00    |
| GH113      | 0.00    | 0.07    | 0.02    | 0.00     | 0.00     | 0.00     | 0.02    | 0.00    | 0.02    | 0.00    | 0.03    | 0.00    | 0.05    | 0.00    | 0.00    | 0.05    |
| GT5        | 0.86    | 0.69    | 0.73    | 0.58     | 0.43     | 0.42     | 0.33    | 0.54    | 0.61    | 0.37    | 0.68    | 0.59    | 0.54    | 0.57    | 0.35    | 0.37    |
| GH94       | 0.61    | 0.69    | 0.78    | 0.63     | 0.21     | 0.25     | 0.29    | 0.45    | 0.76    | 0.61    | 0.41    | 0.59    | 0.30    | 0.37    | 0.40    | 0.37    |
| GT66       | 0.00    | 0.03    | 0.00    | 0.00     | 0.12     | 0.00     | 0.04    | 0.00    | 0.02    | 0.00    | 0.06    | 0.00    | 0.00    | 0.00    | 0.00    | 0.05    |
| GT94       | 0.00    | 0.00    | 0.00    | 0.00     | 0.00     | 0.00     | 0.00    | 0.00    | 0.00    | 0.00    | 0.00    | 0.00    | 0.00    | 0.00    | 0.00    | 0.00    |
| GH58       | 0.00    | 0.00    | 0.00    | 0.00     | 0.00     | 0.00     | 0.00    | 0.00    | 0.00    | 0.00    | 0.00    | 0.00    | 0.00    | 0.00    | 0.00    | 0.00    |
| GH1        | 1.22    | 0.96    | 1.05    | 0.77     | 0.35     | 0.26     | 0.47    | 0.71    | 0.73    | 1.72    | 0.55    | 0.71    | 0.68    | 0.89    | 0.94    | 0.56    |
| PL22       | 0.00    | 0.00    | 0.00    | 0.00     | 0.00     | 0.00     | 0.00    | 0.00    | 0.02    | 0.02    | 0.00    | 0.00    | 0.00    | 0.00    | 0.05    | 0.00    |
| GT9        | 0.26    | 0.02    | 0.15    | 0.71     | 0.64     | 0.40     | 0.10    | 0.07    | 0.22    | 0.13    | 0.12    | 0.11    | 0.19    | 0.32    | 0.26    | 0.11    |

## Normalized\_abundance\_2

| CAZY_group | FR-AD-6 | FR-AD-7 | FR-AD-8 | IN-CH-15 | IN-CH-14 | IN-CH-13 | IT-AD-1 | IT-AD-2 | IT-AD-3 | IT-AD-4 | IT-AD-5 | IT-AD-6 | JP-AD-1 | JP-AD-2 | JP-AD-3 | JP-AD-4 |
|------------|---------|---------|---------|----------|----------|----------|---------|---------|---------|---------|---------|---------|---------|---------|---------|---------|
| GT76       | 0.00    | 0.00    | 0.00    | 0.00     | 0.00     | 0.00     | 0.00    | 0.00    | 0.00    | 0.00    | 0.00    | 0.00    | 0.00    | 0.00    | 0.00    | 0.00    |
| GT32       | 0.11    | 0.17    | 0.13    | 0.05     | 0.12     | 0.12     | 0.12    | 0.12    | 0.04    | 0.11    | 0.27    | 0.06    | 0.06    | 0.11    | 0.12    | 0.09    |
| GT47       | 0.03    | 0.10    | 0.07    | 0.16     | 0.17     | 0.04     | 0.06    | 0.06    | 0.05    | 0.05    | 0.13    | 0.08    | 0.03    | 0.05    | 0.05    | 0.09    |
| GH84       | 0.13    | 0.12    | 0.25    | 0.50     | 0.48     | 0.25     | 0.41    | 0.07    | 0.09    | 0.09    | 0.24    | 0.09    | 0.20    | 0.16    | 0.02    | 0.12    |
| GH83       | 0.00    | 0.00    | 0.00    | 0.00     | 0.00     | 0.00     | 0.00    | 0.00    | 0.00    | 0.00    | 0.00    | 0.00    | 0.00    | 0.00    | 0.00    | 0.00    |
| GT59       | 0.00    | 0.00    | 0.00    | 0.00     | 0.00     | 0.00     | 0.00    | 0.00    | 0.00    | 0.00    | 0.00    | 0.00    | 0.00    | 0.00    | 0.00    | 0.00    |
| GH34       | 0.00    | 0.00    | 0.00    | 0.00     | 0.00     | 0.00     | 0.00    | 0.00    | 0.00    | 0.00    | 0.00    | 0.00    | 0.00    | 0.00    | 0.00    | 0.00    |
| GT14       | 0.03    | 0.03    | 0.05    | 0.03     | 0.06     | 0.00     | 0.04    | 0.04    | 0.00    | 0.02    | 0.05    | 0.03    | 0.00    | 0.05    | 0.02    | 0.02    |
| GH47       | 0.00    | 0.00    | 0.00    | 0.00     | 0.02     | 0.00     | 0.00    | 0.00    | 0.00    | 0.00    | 0.03    | 0.02    | 0.02    | 0.00    | 0.00    | 0.00    |
| GH97       | 0.77    | 0.96    | 1.02    | 1.85     | 2.36     | 0.70     | 0.82    | 0.40    | 0.73    | 0.27    | 0.55    | 0.77    | 1.06    | 0.37    | 0.49    | 0.59    |
| GH50       | 0.00    | 0.00    | 0.02    | 0.00     | 0.10     | 0.00     | 0.00    | 0.04    | 0.02    | 0.00    | 0.02    | 0.00    | 0.03    | 0.02    | 0.00    | 0.05    |
| GT26       | 0.30    | 0.20    | 0.23    | 0.34     | 0.27     | 0.21     | 0.29    | 0.22    | 0.30    | 0.21    | 0.24    | 0.32    | 0.24    | 0.32    | 0.26    | 0.08    |
| GH18       | 0.53    | 0.79    | 0.53    | 0.24     | 0.66     | 0.26     | 0.74    | 0.56    | 0.47    | 0.24    | 0.70    | 0.49    | 0.52    | 0.49    | 0.42    | 0.35    |
| GH37       | 0.00    | 0.00    | 0.03    | 0.16     | 0.04     | 0.00     | 0.08    | 0.14    | 0.08    | 0.00    | 0.03    | 0.00    | 0.00    | 0.00    | 0.02    | 0.05    |
| PL13       | 0.02    | 0.03    | 0.02    | 0.00     | 0.12     | 0.00     | 0.02    | 0.02    | 0.02    | 0.03    | 0.00    | 0.05    | 0.00    | 0.03    | 0.02    | 0.00    |
| GH27       | 0.11    | 0.34    | 0.37    | 0.48     | 0.31     | 0.21     | 0.33    | 0.33    | 0.34    | 0.21    | 0.20    | 0.11    | 0.16    | 0.12    | 0.21    | 0.27    |
| GT54       | 0.00    | 0.00    | 0.00    | 0.00     | 0.00     | 0.00     | 0.00    | 0.00    | 0.00    | 0.00    | 0.00    | 0.00    | 0.00    | 0.00    | 0.00    | 0.00    |
| GT91       | 0.00    | 0.00    | 0.00    | 0.00     | 0.00     | 0.00     | 0.00    | 0.00    | 0.00    | 0.00    | 0.00    | 0.00    | 0.00    | 0.00    | 0.00    | 0.00    |
| GT72       | 0.00    | 0.00    | 0.00    | 0.00     | 0.00     | 0.00     | 0.00    | 0.00    | 0.00    | 0.00    | 0.00    | 0.00    | 0.00    | 0.00    | 0.00    | 0.00    |
| GH67       | 0.06    | 0.08    | 0.10    | 0.42     | 0.19     | 0.12     | 0.12    | 0.04    | 0.02    | 0.08    | 0.02    | 0.08    | 0.08    | 0.08    | 0.00    | 0.08    |
| GH12       | 0.00    | 0.00    | 0.00    | 0.00     | 0.02     | 0.00     | 0.00    | 0.00    | 0.00    | 0.00    | 0.00    | 0.00    | 0.00    | 0.00    | 0.00    | 0.00    |
| GH91       | 0.02    | 0.07    | 0.05    | 0.00     | 0.12     | 0.00     | 0.00    | 0.02    | 0.05    | 0.00    | 0.05    | 0.00    | 0.00    | 0.00    | 0.00    | 0.00    |
| GT69       | 0.00    | 0.00    | 0.00    | 0.00     | 0.00     | 0.00     | 0.00    | 0.00    | 0.00    | 0.00    | 0.00    | 0.00    | 0.00    | 0.00    | 0.00    | 0.00    |
| GH106      | 0.16    | 0.07    | 0.38    | 0.34     | 0.68     | 0.11     | 0.31    | 0.07    | 0.23    | 0.08    | 0.36    | 0.22    | 0.27    | 0.15    | 0.16    | 0.32    |
| GT62       | 0.00    | 0.00    | 0.00    | 0.00     | 0.00     | 0.00     | 0.00    | 0.00    | 0.00    | 0.00    | 0.00    | 0.00    | 0.00    | 0.00    | 0.00    | 0.00    |
| GH17       | 0.00    | 0.00    | 0.00    | 0.00     | 0.00     | 0.00     | 0.00    | 0.00    | 0.00    | 0.00    | 0.00    | 0.00    | 0.00    | 0.00    | 0.00    | 0.00    |
| GH88       | 0.24    | 0.35    | 0.27    | 0.16     | 0.72     | 0.11     | 0.33    | 0.16    | 0.28    | 0.16    | 0.36    | 0.14    | 0.54    | 0.07    | 0.23    | 0.29    |
| CE5        | 0.00    | 0.00    | 0.00    | 0.00     | 0.00     | 0.00     | 0.00    | 0.00    | 0.00    | 0.00    | 0.00    | 0.00    | 0.00    | 0.00    | 0.00    | 0.00    |
| GT8        | 0.18    | 0.07    | 0.18    | 0.19     | 0.27     | 0.09     | 0.18    | 0.27    | 0.08    | 0.42    | 0.12    | 0.08    | 0.14    | 0.22    | 0.00    | 0.24    |
| GT50       | 0.00    | 0.00    | 0.00    | 0.00     | 0.00     | 0.00     | 0.00    | 0.00    | 0.00    | 0.00    | 0.00    | 0.00    | 0.00    | 0.00    | 0.00    | 0.00    |
| GT20       | 0.06    | 0.03    | 0.13    | 0.05     | 0.14     | 0.00     | 0.18    | 0.05    | 0.16    | 0.03    | 0.06    | 0.00    | 0.08    | 0.02    | 0.00    | 0.08    |
| PL9        | 0.08    | 0.05    | 0.07    | 0.05     | 0.12     | 0.00     | 0.02    | 0.00    | 0.08    | 0.00    | 0.06    | 0.05    | 0.22    | 0.10    | 0.12    | 0.13    |
| GH55       | 0.06    | 0.10    | 0.05    | 0.00     | 0.02     | 0.00     | 0.00    | 0.02    | 0.05    | 0.00    | 0.02    | 0.00    | 0.05    | 0.05    | 0.07    | 0.03    |
| GH64       | 0.03    | 0.00    | 0.00    | 0.00     | 0.00     | 0.00     | 0.00    | 0.00    | 0.00    | 0.00    | 0.00    | 0.00    | 0.00    | 0.00    | 0.02    | 0.00    |
| GH127      | 0.32    | 0.42    | 0.47    | 0.69     | 0.87     | 0.26     | 0.35    | 0.27    | 0.42    | 0.32    | 0.21    | 0.34    | 0.41    | 0.22    | 0.26    | 0.56    |
| GH103      | 0.00    | 0.00    | 0.00    | 0.05     | 0.08     | 0.00     | 0.06    | 0.05    | 0.00    | 0.00    | 0.02    | 0.03    | 0.03    | 0.02    | 0.02    | 0.00    |
| GH3        | 2.90    | 3.57    | 4.31    | 3.91     | 4.27     | 2.00     | 3.51    | 2.57    | 3.33    | 2.73    | 2.61    | 3.13    | 2.94    | 2.20    | 3.00    | 3.24    |
| GT45       | 0.00    | 0.00    | 0.00    | 0.00     | 0.00     | 0.00     | 0.00    | 0.00    | 0.00    | 0.00    | 0.00    | 0.00    | 0.00    | 0.00    | 0.00    | 0.00    |
| GT74       | 0.00    | 0.00    | 0.00    | 0.00     | 0.00     | 0.00     | 0.00    | 0.00    | 0.00    | 0.00    | 0.00    | 0.00    | 0.00    | 0.00    | 0.00    | 0.00    |
| GT90       | 0.00    | 0.00    | 0.00    | 0.00     | 0.00     | 0.00     | 0.02    | 0.00    | 0.00    | 0.00    | 0.00    | 0.00    | 0.00    | 0.00    | 0.00    | 0.00    |
| GH116      | 0.08    | 0.13    | 0.15    | 0.00     | 0.08     | 0.02     | 0.08    | 0.02    | 0.06    | 0.00    | 0.11    | 0.00    | 0.08    | 0.02    | 0.05    | 0.08    |
| GH31       | 1.06    | 1.56    | 1.34    | 2.12     | 1.91     | 0.79     | 1.07    | 0.83    | 1.01    | 0.82    | 1.12    | 1.29    | 1.20    | 0.52    | 1.08    | 1.31    |
| GT12       | 0.00    | 0.00    | 0.00    | 0.00     | 0.00     | 0.00     | 0.00    | 0.00    | 0.00    | 0.00    | 0.00    | 0.00    | 0.00    | 0.00    | 0.00    | 0.00    |
| CE1        | 0.35    | 0.70    | 0.62    | 0.58     | 0.52     | 0.12     | 0.41    | 0.24    | 0.30    | 0.37    | 0.33    | 0.59    | 0.41    | 0.27    | 0.35    | 0.27    |
| GH121      | 0.02    | 0.00    | 0.00    | 0.00     | 0.00     | 0.00     | 0.00    | 0.04    | 0.05    | 0.06    | 0.11    | 0.00    | 0.09    | 0.00    | 0.15    | 0.08    |
| GH79       | 0.00    | 0.00    | 0.00    | 0.00     | 0.00     | 0.00     | 0.00    | 0.00    | 0.02    | 0.00    | 0.00    | 0.00    | 0.00    | 0.00    | 0.00    | 0.00    |
| GT73       | 0.00    | 0.00    | 0.00    | 0.00     | 0.00     | 0.00     | 0.00    | 0.00    | 0.00    | 0.02    | 0.00    | 0.00    | 0.00    | 0.00    | 0.00    | 0.00    |
| GH77       | 0.72    | 0.99    | 0.92    | 1.24     | 0.83     | 0.65     | 0.97    | 1.18    | 0.97    | 0.87    | 0.88    | 1.06    | 0.76    | 0.69    | 1.08    | 0.72    |
| PL17       | 0.00    | 0.00    | 0.02    | 0.00     | 0.02     | 0.00     | 0.00    | 0.00    | 0.00    | 0.03    | 0.00    | 0.00    | 0.02    | 0.11    | 0.00    | 0.07    |
| PL8        | 0.06    | 0.23    | 0.13    | 0.32     | 0.64     | 0.18     | 0.41    | 0.11    | 0.22    | 0.00    | 0.12    | 0.12    | 0.14    | 0.02    | 0.21    | 0.16    |

## Normalized\_abundance\_2

| CAZY_group | FR-AD-6 | FR-AD-7 | FR-AD-8 | IN-CH-15 | IN-CH-14 | IN-CH-13 | IT-AD-1 | IT-AD-2 | IT-AD-3 | IT-AD-4 | IT-AD-5 | IT-AD-6 | JP-AD-1 | JP-AD-2 | JP-AD-3 | JP-AD-4 |
|------------|---------|---------|---------|----------|----------|----------|---------|---------|---------|---------|---------|---------|---------|---------|---------|---------|
| CE9        | 0.30    | 0.34    | 0.52    | 0.66     | 0.85     | 0.18     | 0.64    | 0.33    | 0.44    | 0.50    | 0.42    | 0.39    | 0.44    | 0.32    | 0.42    | 0.32    |
| CE15       | 0.02    | 0.00    | 0.02    | 0.00     | 0.04     | 0.00     | 0.06    | 0.00    | 0.00    | 0.00    | 0.02    | 0.08    | 0.00    | 0.00    | 0.00    | 0.00    |
| GT79       | 0.00    | 0.00    | 0.00    | 0.00     | 0.00     | 0.00     | 0.00    | 0.00    | 0.00    | 0.00    | 0.00    | 0.00    | 0.00    | 0.00    | 0.00    | 0.00    |
| GT10       | 0.00    | 0.03    | 0.02    | 0.00     | 0.02     | 0.00     | 0.02    | 0.02    | 0.00    | 0.00    | 0.00    | 0.00    | 0.00    | 0.00    | 0.00    | 0.00    |
| GH119      | 0.00    | 0.00    | 0.00    | 0.00     | 0.00     | 0.00     | 0.00    | 0.00    | 0.00    | 0.00    | 0.00    | 0.00    | 0.00    | 0.00    | 0.00    | 0.00    |
| GH16       | 0.22    | 0.17    | 0.28    | 0.21     | 0.54     | 0.21     | 0.18    | 0.11    | 0.28    | 0.21    | 0.17    | 0.15    | 0.30    | 0.10    | 0.12    | 0.11    |
| GH43       | 2.37    | 2.73    | 2.27    | 4.39     | 4.06     | 1.53     | 2.38    | 2.14    | 2.70    | 1.70    | 1.67    | 1.80    | 2.83    | 1.31    | 1.54    | 2.86    |
| GH51       | 0.75    | 0.67    | 0.58    | 1.61     | 1.22     | 0.58     | 0.72    | 0.45    | 0.70    | 0.85    | 0.46    | 0.55    | 0.41    | 0.30    | 0.42    | 0.70    |
| GT35       | 1.73    | 1.63    | 1.34    | 1.24     | 1.08     | 0.79     | 1.17    | 1.03    | 1.54    | 1.91    | 1.03    | 1.37    | 1.03    | 1.11    | 1.12    | 1.15    |
| GT25       | 0.00    | 0.02    | 0.00    | 0.00     | 0.06     | 0.00     | 0.00    | 0.00    | 0.00    | 0.00    | 0.00    | 0.00    | 0.00    | 0.03    | 0.00    | 0.00    |
| GT2        | 6.54    | 7.06    | 7.85    | 8.17     | 9.59     | 4.98     | 5.79    | 4.91    | 6.62    | 7.24    | 5.93    | 5.83    | 6.61    | 4.58    | 5.85    | 5.27    |
| GT51       | 1.41    | 1.04    | 1.25    | 4.28     | 4.00     | 1.09     | 1.27    | 1.21    | 1.03    | 1.22    | 1.11    | 1.37    | 0.95    | 0.82    | 1.40    | 0.83    |
| GH107      | 0.00    | 0.00    | 0.00    | 0.00     | 0.00     | 0.00     | 0.00    | 0.00    | 0.00    | 0.00    | 0.00    | 0.00    | 0.00    | 0.00    | 0.00    | 0.00    |
| GH7        | 0.00    | 0.00    | 0.00    | 0.00     | 0.00     | 0.00     | 0.00    | 0.00    | 0.00    | 0.00    | 0.00    | 0.00    | 0.00    | 0.00    | 0.00    | 0.00    |
| GT7        | 0.00    | 0.00    | 0.00    | 0.00     | 0.00     | 0.00     | 0.00    | 0.00    | 0.00    | 0.00    | 0.00    | 0.00    | 0.00    | 0.00    | 0.00    | 0.00    |
| GT36       | 0.00    | 0.00    | 0.00    | 0.00     | 0.00     | 0.00     | 0.00    | 0.00    | 0.00    | 0.00    | 0.00    | 0.00    | 0.00    | 0.00    | 0.00    | 0.00    |
| PL7        | 0.00    | 0.00    | 0.00    | 0.00     | 0.00     | 0.00     | 0.00    | 0.00    | 0.00    | 0.03    | 0.00    | 0.00    | 0.00    | 0.00    | 0.02    | 0.00    |
| GH110      | 0.02    | 0.12    | 0.17    | 0.00     | 0.41     | 0.04     | 0.12    | 0.05    | 0.14    | 0.11    | 0.17    | 0.06    | 0.11    | 0.02    | 0.07    | 0.16    |
| GT21       | 0.00    | 0.00    | 0.00    | 0.00     | 0.00     | 0.00     | 0.00    | 0.00    | 0.00    | 0.00    | 0.00    | 0.00    | 0.00    | 0.00    | 0.00    | 0.00    |
| GH62       | 0.00    | 0.00    | 0.00    | 0.00     | 0.00     | 0.00     | 0.00    | 0.00    | 0.00    | 0.00    | 0.00    | 0.00    | 0.00    | 0.00    | 0.00    | 0.00    |
| GH125      | 0.18    | 0.29    | 0.18    | 0.42     | 0.37     | 0.09     | 0.29    | 0.07    | 0.19    | 0.13    | 0.15    | 0.28    | 0.30    | 0.15    | 0.26    | 0.21    |
| GH117      | 0.03    | 0.05    | 0.13    | 0.11     | 0.12     | 0.05     | 0.12    | 0.05    | 0.12    | 0.00    | 0.08    | 0.08    | 0.19    | 0.07    | 0.12    | 0.05    |
| GH68       | 0.00    | 0.00    | 0.00    | 0.03     | 0.00     | 0.00     | 0.00    | 0.00    | 0.00    | 0.11    | 0.00    | 0.00    | 0.00    | 0.00    | 0.00    | 0.00    |
| GH85       | 0.18    | 0.08    | 0.00    | 0.48     | 0.00     | 0.11     | 0.08    | 0.00    | 0.08    | 0.08    | 0.00    | 0.03    | 0.00    | 0.00    | 0.14    | 0.03    |
| GH92       | 1.06    | 1.56    | 1.60    | 2.75     | 3.91     | 1.14     | 1.74    | 0.63    | 1.71    | 0.58    | 1.33    | 1.37    | 1.58    | 0.57    | 1.10    | 1.15    |
| GH40       | 0.00    | 0.00    | 0.00    | 0.00     | 0.00     | 0.00     | 0.00    | 0.00    | 0.00    | 0.00    | 0.00    | 0.00    | 0.00    | 0.00    | 0.00    | 0.00    |
| GT49       | 0.00    | 0.00    | 0.00    | 0.00     | 0.00     | 0.00     | 0.00    | 0.00    | 0.00    | 0.00    | 0.00    | 0.00    | 0.00    | 0.00    | 0.00    | 0.00    |
| GH112      | 0.43    | 0.54    | 0.32    | 0.11     | 0.06     | 0.14     | 0.39    | 0.29    | 0.37    | 0.48    | 0.18    | 0.31    | 0.41    | 0.27    | 0.26    | 0.29    |
| GT67       | 0.00    | 0.00    | 0.00    | 0.00     | 0.00     | 0.00     | 0.00    | 0.00    | 0.00    | 0.00    | 0.00    | 0.00    | 0.00    | 0.00    | 0.00    | 0.00    |
| CE8        | 0.19    | 0.05    | 0.20    | 0.29     | 0.39     | 0.19     | 0.23    | 0.09    | 0.23    | 0.27    | 0.08    | 0.09    | 0.41    | 0.17    | 0.28    | 0.27    |
| GT86       | 0.00    | 0.00    | 0.00    | 0.00     | 0.00     | 0.00     | 0.00    | 0.00    | 0.00    | 0.00    | 0.00    | 0.00    | 0.00    | 0.00    | 0.00    | 0.00    |
| GH101      | 0.02    | 0.03    | 0.05    | 0.00     | 0.02     | 0.00     | 0.23    | 0.11    | 0.09    | 0.16    | 0.15    | 0.00    | 0.08    | 0.00    | 0.12    | 0.08    |
| GH81       | 0.02    | 0.02    | 0.03    | 0.00     | 0.00     | 0.00     | 0.00    | 0.00    | 0.00    | 0.00    | 0.00    | 0.00    | 0.00    | 0.00    | 0.02    | 0.00    |
| GT93       | 0.00    | 0.00    | 0.00    | 0.00     | 0.00     | 0.00     | 0.00    | 0.00    | 0.00    | 0.00    | 0.00    | 0.00    | 0.00    | 0.00    | 0.00    | 0.00    |
| GT63       | 0.00    | 0.00    | 0.00    | 0.00     | 0.00     | 0.00     | 0.00    | 0.00    | 0.00    | 0.00    | 0.00    | 0.00    | 0.00    | 0.00    | 0.00    | 0.00    |
| CE11       | 0.24    | 0.20    | 0.28    | 0.56     | 0.77     | 0.33     | 0.23    | 0.25    | 0.22    | 0.21    | 0.15    | 0.25    | 0.27    | 0.17    | 0.21    | 0.21    |
| GT19       | 0.10    | 0.15    | 0.15    | 0.42     | 0.39     | 0.30     | 0.16    | 0.13    | 0.20    | 0.11    | 0.15    | 0.31    | 0.11    | 0.15    | 0.26    | 0.08    |
| GT33       | 0.00    | 0.00    | 0.00    | 0.00     | 0.00     | 0.00     | 0.00    | 0.00    | 0.00    | 0.00    | 0.00    | 0.00    | 0.00    | 0.00    | 0.00    | 0.00    |
| GH21       | 0.00    | 0.00    | 0.00    | 0.00     | 0.00     | 0.00     | 0.00    | 0.00    | 0.00    | 0.00    | 0.00    | 0.00    | 0.00    | 0.00    | 0.00    | 0.00    |
| GT68       | 0.00    | 0.00    | 0.00    | 0.00     | 0.00     | 0.00     | 0.00    | 0.00    | 0.00    | 0.00    | 0.00    | 0.00    | 0.00    | 0.00    | 0.00    | 0.00    |
| GH89       | 0.24    | 0.13    | 0.23    | 0.56     | 0.50     | 0.25     | 0.12    | 0.16    | 0.23    | 0.21    | 0.18    | 0.18    | 0.19    | 0.10    | 0.12    | 0.27    |
| GT82       | 0.00    | 0.00    | 0.00    | 0.00     | 0.02     | 0.00     | 0.00    | 0.00    | 0.00    | 0.00    | 0.00    | 0.00    | 0.00    | 0.00    | 0.00    | 0.00    |
| GH30       | 0.27    | 0.25    | 0.22    | 0.24     | 0.31     | 0.09     | 0.31    | 0.14    | 0.20    | 0.16    | 0.23    | 0.31    | 0.33    | 0.05    | 0.12    | 0.21    |
| GH20       | 0.85    | 0.80    | 1.34    | 2.06     | 2.90     | 0.93     | 1.87    | 0.72    | 1.54    | 0.48    | 1.00    | 1.20    | 0.73    | 0.54    | 0.54    | 0.94    |
| GH52       | 0.00    | 0.00    | 0.00    | 0.00     | 0.00     | 0.00     | 0.00    | 0.00    | 0.00    | 0.00    | 0.00    | 0.00    | 0.00    | 0.00    | 0.00    | 0.00    |
| GT84       | 0.02    | 0.02    | 0.00    | 0.00     | 0.00     | 0.00     | 0.02    | 0.07    | 0.12    | 0.00    | 0.08    | 0.03    | 0.03    | 0.00    | 0.12    | 0.03    |
| GT15       | 0.00    | 0.00    | 0.00    | 0.00     | 0.00     | 0.00     | 0.00    | 0.00    | 0.00    | 0.00    | 0.00    | 0.00    | 0.00    | 0.00    | 0.00    | 0.00    |
| GH93       | 0.00    | 0.05    | 0.02    | 0.00     | 0.00     | 0.00     | 0.00    | 0.00    | 0.02    | 0.00    | 0.02    | 0.00    | 0.00    | 0.00    | 0.00    | 0.00    |
| PL16       | 0.00    | 0.00    | 0.00    | 0.00     | 0.00     | 0.00     | 0.00    | 0.00    | 0.00    | 0.00    | 0.00    | 0.00    | 0.00    | 0.00    | 0.00    | 0.00    |
| GH26       | 0.11    | 0.23    | 0.22    | 0.29     | 0.17     | 0.11     | 0.16    | 0.20    | 0.08    | 0.00    | 0.06    | 0.17    | 0.03    | 0.10    | 0.09    | 0.29    |

## Normalized\_abundance\_2

| CAZY_group | FR-AD-6 | FR-AD-7 | FR-AD-8 | IN-CH-15 | IN-CH-14 | IN-CH-13 | IT-AD-1 | IT-AD-2 | IT-AD-3 | IT-AD-4 | IT-AD-5 | IT-AD-6 | JP-AD-1 | JP-AD-2 | JP-AD-3 | JP-AD-4 |
|------------|---------|---------|---------|----------|----------|----------|---------|---------|---------|---------|---------|---------|---------|---------|---------|---------|
| GT75       | 0.00    | 0.00    | 0.00    | 0.00     | 0.00     | 0.00     | 0.00    | 0.00    | 0.00    | 0.00    | 0.00    | 0.00    | 0.00    | 0.00    | 0.00    | 0.00    |
| GH53       | 0.16    | 0.32    | 0.17    | 0.29     | 0.14     | 0.25     | 0.04    | 0.07    | 0.23    | 0.05    | 0.06    | 0.08    | 0.03    | 0.32    | 0.12    | 0.16    |
| GT88       | 0.00    | 0.00    | 0.00    | 0.00     | 0.00     | 0.00     | 0.00    | 0.00    | 0.00    | 0.00    | 0.00    | 0.00    | 0.00    | 0.00    | 0.00    | 0.00    |
| GT24       | 0.00    | 0.00    | 0.00    | 0.00     | 0.00     | 0.00     | 0.00    | 0.00    | 0.00    | 0.00    | 0.00    | 0.00    | 0.00    | 0.00    | 0.00    | 0.00    |
| GT81       | 0.00    | 0.00    | 0.00    | 0.00     | 0.00     | 0.00     | 0.00    | 0.00    | 0.00    | 0.00    | 0.00    | 0.00    | 0.00    | 0.00    | 0.00    | 0.00    |
| GH4        | 0.18    | 0.27    | 0.35    | 0.32     | 0.17     | 0.12     | 0.21    | 0.60    | 0.19    | 0.16    | 0.30    | 0.29    | 0.11    | 0.35    | 0.26    | 0.05    |
| GT78       | 0.00    | 0.00    | 0.00    | 0.00     | 0.00     | 0.00     | 0.00    | 0.00    | 0.00    | 0.00    | 0.00    | 0.00    | 0.00    | 0.00    | 0.00    | 0.00    |
| GH8        | 0.11    | 0.13    | 0.03    | 0.05     | 0.08     | 0.12     | 0.08    | 0.05    | 0.12    | 0.13    | 0.11    | 0.03    | 0.08    | 0.05    | 0.05    | 0.13    |
| GH70       | 0.08    | 0.00    | 0.00    | 0.11     | 0.00     | 0.00     | 0.00    | 0.00    | 0.00    | 0.87    | 0.00    | 0.03    | 0.00    | 0.00    | 0.09    | 0.00    |
| GH122      | 0.00    | 0.00    | 0.00    | 0.00     | 0.00     | 0.00     | 0.00    | 0.00    | 0.00    | 0.00    | 0.00    | 0.00    | 0.00    | 0.00    | 0.00    | 0.00    |
| GH74       | 0.02    | 0.02    | 0.03    | 0.00     | 0.00     | 0.00     | 0.04    | 0.09    | 0.02    | 0.00    | 0.00    | 0.00    | 0.00    | 0.02    | 0.02    | 0.03    |
| GT41       | 0.06    | 0.00    | 0.02    | 0.00     | 0.02     | 0.00     | 0.00    | 0.00    | 0.02    | 0.03    | 0.02    | 0.02    | 0.03    | 0.02    | 0.00    | 0.03    |
| PL1        | 0.21    | 0.37    | 0.22    | 0.16     | 0.64     | 0.12     | 0.29    | 0.07    | 0.22    | 0.03    | 0.12    | 0.09    | 0.27    | 0.12    | 0.07    | 0.24    |
| GH15       | 0.02    | 0.02    | 0.03    | 0.00     | 0.08     | 0.00     | 0.10    | 0.05    | 0.12    | 0.05    | 0.08    | 0.00    | 0.05    | 0.02    | 0.02    | 0.11    |
| GH32       | 0.88    | 0.87    | 0.87    | 1.08     | 0.93     | 0.69     | 0.51    | 0.40    | 0.65    | 0.98    | 0.47    | 0.62    | 0.60    | 0.30    | 0.61    | 0.46    |
| GH44       | 0.00    | 0.02    | 0.00    | 0.00     | 0.00     | 0.00     | 0.00    | 0.00    | 0.02    | 0.00    | 0.00    | 0.02    | 0.00    | 0.00    | 0.00    | 0.00    |
| GT6        | 0.00    | 0.02    | 0.00    | 0.00     | 0.00     | 0.00     | 0.00    | 0.02    | 0.00    | 0.03    | 0.00    | 0.00    | 0.03    | 0.00    | 0.00    | 0.00    |
| GH13       | 4.42    | 5.00    | 5.08    | 5.10     | 3.29     | 3.08     | 4.31    | 4.62    | 4.82    | 5.51    | 4.20    | 4.55    | 3.13    | 3.22    | 4.19    | 4.39    |
| GT80       | 0.00    | 0.00    | 0.02    | 0.00     | 0.04     | 0.00     | 0.04    | 0.09    | 0.02    | 0.00    | 0.02    | 0.06    | 0.00    | 0.00    | 0.02    | 0.00    |
| GH71       | 0.00    | 0.00    | 0.00    | 0.00     | 0.00     | 0.00     | 0.00    | 0.00    | 0.00    | 0.00    | 0.00    | 0.00    | 0.00    | 0.00    | 0.00    | 0.00    |
| GH63       | 0.16    | 0.15    | 0.12    | 0.26     | 0.31     | 0.05     | 0.31    | 0.20    | 0.19    | 0.03    | 0.15    | 0.06    | 0.16    | 0.15    | 0.19    | 0.13    |
| PL21       | 0.02    | 0.00    | 0.03    | 0.00     | 0.19     | 0.00     | 0.06    | 0.00    | 0.00    | 0.00    | 0.00    | 0.02    | 0.19    | 0.00    | 0.00    | 0.11    |
| GH65       | 0.19    | 0.34    | 0.45    | 0.13     | 0.23     | 0.05     | 0.18    | 0.07    | 0.20    | 0.13    | 0.15    | 0.14    | 0.11    | 0.25    | 0.16    | 0.08    |
| CE4        | 0.61    | 0.55    | 0.68    | 0.82     | 0.60     | 0.33     | 0.62    | 0.60    | 0.73    | 0.42    | 0.55    | 0.45    | 0.65    | 0.79    | 0.59    | 0.54    |
| CE14       | 0.00    | 0.02    | 0.02    | 0.05     | 0.06     | 0.02     | 0.08    | 0.04    | 0.02    | 0.00    | 0.05    | 0.00    | 0.00    | 0.05    | 0.00    | 0.05    |
| GH115      | 0.16    | 0.27    | 0.20    | 0.42     | 0.23     | 0.14     | 0.23    | 0.11    | 0.36    | 0.11    | 0.11    | 0.18    | 0.08    | 0.02    | 0.02    | 0.35    |
| GH104      | 0.00    | 0.00    | 0.00    | 0.00     | 0.04     | 0.00     | 0.00    | 0.04    | 0.00    | 0.00    | 0.02    | 0.00    | 0.00    | 0.00    | 0.00    | 0.00    |
| GH111      | 0.00    | 0.00    | 0.00    | 0.00     | 0.00     | 0.00     | 0.00    | 0.00    | 0.00    | 0.03    | 0.00    | 0.00    | 0.00    | 0.00    | 0.00    | 0.00    |
| GH95       | 0.69    | 0.52    | 0.70    | 1.59     | 1.70     | 0.53     | 0.64    | 0.25    | 0.69    | 0.27    | 0.73    | 0.46    | 0.57    | 0.27    | 0.44    | 0.59    |
| GT70       | 0.00    | 0.00    | 0.00    | 0.00     | 0.00     | 0.00     | 0.00    | 0.00    | 0.00    | 0.00    | 0.00    | 0.00    | 0.00    | 0.00    | 0.00    | 0.00    |
| CE10       | 0.11    | 0.10    | 0.27    | 0.32     | 0.35     | 0.09     | 0.27    | 0.13    | 0.22    | 0.13    | 0.14    | 0.18    | 0.19    | 0.22    | 0.19    | 0.21    |
| GH10       | 0.22    | 0.15    | 0.15    | 0.40     | 0.25     | 0.18     | 0.06    | 0.09    | 0.11    | 0.24    | 0.05    | 0.09    | 0.14    | 0.07    | 0.05    | 0.21    |
| GH130      | 0.26    | 0.54    | 0.28    | 0.26     | 0.60     | 0.26     | 0.47    | 0.20    | 0.44    | 0.21    | 0.14    | 0.35    | 0.27    | 0.22    | 0.28    | 0.37    |
| PL20       | 0.00    | 0.00    | 0.00    | 0.00     | 0.00     | 0.00     | 0.00    | 0.00    | 0.00    | 0.00    | 0.00    | 0.00    | 0.00    | 0.00    | 0.00    | 0.00    |
| GH69       | 0.00    | 0.00    | 0.00    | 0.00     | 0.00     | 0.00     | 0.00    | 0.00    | 0.00    | 0.00    | 0.00    | 0.00    | 0.00    | 0.00    | 0.00    | 0.00    |
| PL2        | 0.00    | 0.00    | 0.00    | 0.00     | 0.00     | 0.00     | 0.00    | 0.00    | 0.00    | 0.00    | 0.00    | 0.00    | 0.00    | 0.00    | 0.00    | 0.00    |
| GH49       | 0.00    | 0.00    | 0.00    | 0.00     | 0.00     | 0.00     | 0.00    | 0.00    | 0.00    | 0.00    | 0.00    | 0.00    | 0.00    | 0.00    | 0.00    | 0.00    |
| GH25       | 0.70    | 0.44    | 0.50    | 1.16     | 0.50     | 0.76     | 0.37    | 0.45    | 0.37    | 0.82    | 0.23    | 0.39    | 0.63    | 0.35    | 0.51    | 0.94    |
| GH59       | 0.00    | 0.05    | 0.03    | 0.03     | 0.00     | 0.00     | 0.00    | 0.00    | 0.05    | 0.00    | 0.02    | 0.00    | 0.00    | 0.00    | 0.00    | 0.00    |
| GH35       | 0.32    | 0.29    | 0.23    | 0.71     | 0.95     | 0.21     | 0.43    | 0.43    | 0.26    | 0.24    | 0.36    | 0.45    | 0.30    | 0.07    | 0.14    | 0.32    |
| GT39       | 0.03    | 0.02    | 0.00    | 0.00     | 0.00     | 0.00     | 0.02    | 0.04    | 0.02    | 0.00    | 0.00    | 0.00    | 0.00    | 0.00    | 0.00    | 0.00    |
| GT57       | 0.00    | 0.00    | 0.00    | 0.00     | 0.00     | 0.00     | 0.00    | 0.00    | 0.00    | 0.00    | 0.00    | 0.00    | 0.00    | 0.00    | 0.00    | 0.00    |
| GH129      | 0.02    | 0.03    | 0.05    | 0.03     | 0.02     | 0.00     | 0.06    | 0.04    | 0.06    | 0.08    | 0.02    | 0.00    | 0.00    | 0.02    | 0.02    | 0.00    |
| GT22       | 0.00    | 0.00    | 0.00    | 0.00     | 0.00     | 0.00     | 0.00    | 0.00    | 0.00    | 0.00    | 0.00    | 0.00    | 0.00    | 0.00    | 0.00    | 0.00    |
| PL12       | 0.05    | 0.10    | 0.00    | 0.05     | 0.33     | 0.00     | 0.08    | 0.04    | 0.02    | 0.00    | 0.06    | 0.08    | 0.16    | 0.02    | 0.00    | 0.08    |
| PL18       | 0.00    | 0.00    | 0.00    | 0.00     | 0.00     | 0.00     | 0.00    | 0.00    | 0.00    | 0.00    | 0.00    | 0.00    | 0.00    | 0.00    | 0.00    | 0.00    |
| GT92       | 0.00    | 0.00    | 0.00    | 0.00     | 0.00     | 0.00     | 0.00    | 0.00    | 0.00    | 0.00    | 0.00    | 0.00    | 0.00    | 0.00    | 0.00    | 0.00    |
| GT44       | 0.00    | 0.00    | 0.03    | 0.03     | 0.00     | 0.00     | 0.00    | 0.00    | 0.00    | 0.00    | 0.00    | 0.00    | 0.00    | 0.00    | 0.00    | 0.00    |
| GT29       | 0.00    | 0.00    | 0.00    | 0.00     | 0.00     | 0.00     | 0.00    | 0.00    | 0.00    | 0.00    | 0.00    | 0.00    | 0.00    | 0.00    | 0.00    | 0.00    |
| GT13       | 0.00    | 0.00    | 0.00    | 0.00     | 0.00     | 0.00     | 0.00    | 0.00    | 0.00    | 0.00    | 0.00    | 0.00    | 0.00    | 0.00    | 0.00    | 0.00    |

Normalized\_abundance\_2

| CAZY_group | FR-AD-6 | FR-AD-7 | FR-AD-8 | IN-CH-15 | IN-CH-14 | IN-CH-13 | IT-AD-1 | IT-AD-2 | IT-AD-3 | IT-AD-4 | IT-AD-5 | IT-AD-6 | JP-AD-1 | JP-AD-2 | JP-AD-3 | JP-AD-4 |
|------------|---------|---------|---------|----------|----------|----------|---------|---------|---------|---------|---------|---------|---------|---------|---------|---------|
| GT52       | 0.00    | 0.00    | 0.00    | 0.00     | 0.00     | 0.00     | 0.00    | 0.00    | 0.00    | 0.00    | 0.00    | 0.00    | 0.00    | 0.00    | 0.00    | 0.00    |
| GT64       | 0.00    | 0.00    | 0.00    | 0.00     | 0.00     | 0.00     | 0.00    | 0.00    | 0.00    | 0.00    | 0.00    | 0.00    | 0.00    | 0.00    | 0.00    | 0.00    |
| GT85       | 0.00    | 0.00    | 0.00    | 0.00     | 0.00     | 0.00     | 0.00    | 0.00    | 0.00    | 0.00    | 0.00    | 0.00    | 0.00    | 0.00    | 0.00    | 0.00    |
| GT16       | 0.00    | 0.00    | 0.00    | 0.00     | 0.00     | 0.00     | 0.00    | 0.00    | 0.00    | 0.00    | 0.00    | 0.00    | 0.00    | 0.00    | 0.00    | 0.00    |
| GH56       | 0.00    | 0.00    | 0.00    | 0.00     | 0.00     | 0.00     | 0.00    | 0.00    | 0.00    | 0.00    | 0.00    | 0.00    | 0.00    | 0.00    | 0.00    | 0.00    |
| GT60       | 0.00    | 0.00    | 0.00    | 0.00     | 0.00     | 0.00     | 0.00    | 0.00    | 0.00    | 0.00    | 0.00    | 0.00    | 0.00    | 0.00    | 0.00    | 0.00    |
| GH41       | 0.00    | 0.00    | 0.00    | 0.00     | 0.00     | 0.00     | 0.00    | 0.00    | 0.00    | 0.00    | 0.00    | 0.00    | 0.00    | 0.00    | 0.00    | 0.00    |
| CE7        | 0.10    | 0.07    | 0.08    | 0.34     | 0.19     | 0.18     | 0.06    | 0.07    | 0.16    | 0.11    | 0.11    | 0.06    | 0.14    | 0.07    | 0.12    | 0.08    |
| GH39       | 0.08    | 0.15    | 0.05    | 0.03     | 0.02     | 0.00     | 0.04    | 0.05    | 0.14    | 0.11    | 0.02    | 0.05    | 0.00    | 0.05    | 0.07    | 0.03    |
| GT30       | 0.22    | 0.25    | 0.30    | 0.69     | 0.66     | 0.28     | 0.33    | 0.36    | 0.25    | 0.16    | 0.27    | 0.34    | 0.30    | 0.20    | 0.37    | 0.21    |
| PL15       | 0.05    | 0.07    | 0.00    | 0.11     | 0.23     | 0.00     | 0.02    | 0.00    | 0.06    | 0.00    | 0.05    | 0.05    | 0.03    | 0.00    | 0.00    | 0.24    |
| GH102      | 0.02    | 0.07    | 0.05    | 0.05     | 0.10     | 0.00     | 0.06    | 0.09    | 0.11    | 0.00    | 0.05    | 0.02    | 0.03    | 0.05    | 0.16    | 0.11    |



## Normalized\_abundance\_2

| CAZY_group | JP-AD-7 | JP-AD-8 | JP-AD-9 | JP-CH-1 | JP-CH-2 | JP-IN-1 | JP-IN-2 | JP-IN-3 | JP-IN-4 | IN-CH-16 | MA-AD-1 | MA-AD-2 | MA-AD-3 | MA-AD-4 | MA-IN-1 | MA-IN-10 |
|------------|---------|---------|---------|---------|---------|---------|---------|---------|---------|----------|---------|---------|---------|---------|---------|----------|
| GH29       | 1.30    | 0.92    | 0.66    | 0.50    | 0.95    | 0.13    | 0.18    | 0.20    | 0.45    | 0.74     | 0.80    | 0.97    | 1.27    | 0.94    | 1.61    | 3.38     |
| PL4        | 0.00    | 0.00    | 0.00    | 0.00    | 0.02    | 0.00    | 0.00    | 0.00    | 0.00    | 0.00     | 0.00    | 0.00    | 0.00    | 0.00    | 0.00    | 0.00     |
| GH23       | 1.42    | 1.60    | 1.47    | 1.96    | 1.39    | 1.78    | 0.82    | 1.69    | 1.67    | 0.61     | 2.00    | 2.85    | 2.20    | 1.90    | 1.78    | 2.49     |
| CE6        | 0.04    | 0.00    | 0.08    | 0.03    | 0.07    | 0.00    | 0.00    | 0.15    | 0.08    | 0.29     | 0.46    | 0.15    | 0.75    | 0.50    | 0.29    | 0.00     |
| GH72       | 0.20    | 0.24    | 0.08    | 0.06    | 0.14    | 0.04    | 0.18    | 0.10    | 0.04    | 0.10     | 0.55    | 0.53    | 0.53    | 0.52    | 0.41    | 0.30     |
| GH114      | 0.00    | 0.00    | 0.00    | 0.00    | 0.00    | 0.00    | 0.00    | 0.00    | 0.00    | 0.00     | 0.00    | 0.00    | 0.00    | 0.00    | 0.00    | 0.00     |
| GH78       | 1.03    | 0.65    | 0.76    | 0.98    | 1.37    | 0.30    | 0.18    | 0.20    | 0.32    | 0.35     | 0.80    | 0.86    | 1.04    | 0.86    | 0.53    | 0.00     |
| PL19       | 0.00    | 0.00    | 0.00    | 0.00    | 0.00    | 0.00    | 0.00    | 0.00    | 0.00    | 0.00     | 0.00    | 0.00    | 0.00    | 0.00    | 0.00    | 0.00     |
| GT27       | 0.00    | 0.00    | 0.00    | 0.00    | 0.00    | 0.00    | 0.00    | 0.00    | 0.00    | 0.00     | 0.00    | 0.00    | 0.00    | 0.00    | 0.00    | 0.00     |
| GH5        | 0.24    | 0.60    | 0.43    | 0.65    | 0.60    | 0.21    | 0.18    | 0.20    | 0.12    | 0.84     | 2.07    | 1.30    | 2.14    | 1.16    | 1.60    | 3.10     |
| GT40       | 0.00    | 0.00    | 0.00    | 0.00    | 0.00    | 0.00    | 0.00    | 0.00    | 0.00    | 0.00     | 0.00    | 0.00    | 0.00    | 0.00    | 0.00    | 0.00     |
| CE13       | 0.00    | 0.00    | 0.00    | 0.00    | 0.00    | 0.00    | 0.00    | 0.00    | 0.00    | 0.00     | 0.02    | 0.00    | 0.00    | 0.01    | 0.00    | 0.00     |
| GT37       | 0.00    | 0.00    | 0.00    | 0.00    | 0.00    | 0.00    | 0.00    | 0.00    | 0.00    | 0.00     | 0.00    | 0.00    | 0.00    | 0.00    | 0.00    | 0.00     |
| GH33       | 0.20    | 0.22    | 0.33    | 0.14    | 0.35    | 0.25    | 0.18    | 0.10    | 0.24    | 0.02     | 0.19    | 0.22    | 0.31    | 0.24    | 0.46    | 2.59     |
| GT65       | 0.00    | 0.00    | 0.00    | 0.00    | 0.00    | 0.00    | 0.00    | 0.00    | 0.00    | 0.00     | 0.00    | 0.00    | 0.00    | 0.00    | 0.00    | 0.00     |
| GH86       | 0.00    | 0.02    | 0.00    | 0.00    | 0.02    | 0.04    | 0.00    | 0.00    | 0.00    | 0.00     | 0.04    | 0.02    | 0.04    | 0.00    | 0.00    | 0.00     |
| GH123      | 0.08    | 0.10    | 0.13    | 0.00    | 0.14    | 0.00    | 0.00    | 0.00    | 0.00    | 0.08     | 0.05    | 0.09    | 0.06    | 0.11    | 0.05    | 0.00     |
| GH96       | 0.00    | 0.00    | 0.00    | 0.00    | 0.00    | 0.00    | 0.00    | 0.00    | 0.00    | 0.00     | 0.00    | 0.00    | 0.00    | 0.00    | 0.00    | 0.00     |
| GH14       | 0.00    | 0.00    | 0.00    | 0.00    | 0.00    | 0.00    | 0.00    | 0.00    | 0.00    | 0.00     | 0.00    | 0.00    | 0.00    | 0.01    | 0.00    | 0.00     |
| CE3        | 0.00    | 0.00    | 0.00    | 0.00    | 0.00    | 0.00    | 0.00    | 0.00    | 0.00    | 0.00     | 0.00    | 0.00    | 0.00    | 0.01    | 0.00    | 0.00     |
| PL10       | 0.24    | 0.17    | 0.18    | 0.08    | 0.19    | 0.00    | 0.00    | 0.00    | 0.00    | 0.31     | 0.16    | 0.07    | 0.37    | 0.28    | 0.28    | 0.00     |
| GT48       | 0.00    | 0.00    | 0.00    | 0.00    | 0.00    | 0.00    | 0.00    | 0.00    | 0.00    | 0.00     | 0.00    | 0.00    | 0.00    | 0.00    | 0.00    | 0.00     |
| PL6        | 0.00    | 0.02    | 0.00    | 0.00    | 0.00    | 0.00    | 0.00    | 0.00    | 0.00    | 0.00     | 0.00    | 0.04    | 0.00    | 0.00    | 0.01    | 0.00     |
| GT83       | 0.16    | 0.05    | 0.15    | 0.11    | 0.05    | 0.13    | 0.00    | 0.00    | 0.32    | 0.14     | 0.30    | 0.09    | 0.41    | 0.28    | 0.67    | 0.18     |
| GH126      | 0.00    | 0.00    | 0.00    | 0.00    | 0.00    | 0.00    | 0.00    | 0.00    | 0.00    | 0.00     | 0.00    | 0.00    | 0.00    | 0.00    | 0.00    | 0.00     |
| GH9        | 0.16    | 0.46    | 0.23    | 0.56    | 0.77    | 0.04    | 0.09    | 0.00    | 0.00    | 0.02     | 0.67    | 0.77    | 0.73    | 0.45    | 0.00    | 0.00     |
| GH75       | 0.00    | 0.00    | 0.00    | 0.00    | 0.00    | 0.00    | 0.00    | 0.00    | 0.00    | 0.00     | 0.00    | 0.00    | 0.00    | 0.00    | 0.00    | 0.00     |
| GT71       | 0.00    | 0.00    | 0.00    | 0.00    | 0.00    | 0.00    | 0.00    | 0.00    | 0.00    | 0.00     | 0.00    | 0.00    | 0.00    | 0.00    | 0.00    | 0.00     |
| GH46       | 0.00    | 0.00    | 0.00    | 0.00    | 0.00    | 0.00    | 0.00    | 0.00    | 0.00    | 0.00     | 0.00    | 0.00    | 0.00    | 0.00    | 0.00    | 0.00     |
| GT61       | 0.00    | 0.00    | 0.00    | 0.00    | 0.00    | 0.00    | 0.00    | 0.00    | 0.00    | 0.00     | 0.00    | 0.00    | 0.00    | 0.00    | 0.00    | 0.00     |
| GT3        | 0.20    | 0.22    | 0.10    | 0.11    | 0.23    | 0.00    | 0.00    | 0.00    | 0.08    | 0.37     | 0.21    | 0.29    | 0.69    | 0.55    | 0.30    | 0.00     |
| PL3        | 0.00    | 0.00    | 0.00    | 0.00    | 0.00    | 0.00    | 0.00    | 0.00    | 0.00    | 0.00     | 0.00    | 0.00    | 0.00    | 0.00    | 0.00    | 0.00     |
| GH108      | 0.08    | 0.05    | 0.00    | 0.03    | 0.05    | 0.08    | 0.00    | 0.00    | 0.04    | 0.02     | 0.00    | 0.04    | 0.02    | 0.01    | 0.01    | 0.00     |
| GT56       | 0.00    | 0.00    | 0.03    | 0.00    | 0.00    | 0.34    | 0.00    | 0.00    | 0.08    | 0.00     | 0.00    | 0.00    | 0.00    | 0.00    | 0.01    | 0.06     |
| PL11       | 0.20    | 0.12    | 0.15    | 0.08    | 0.19    | 0.00    | 0.00    | 0.00    | 0.08    | 0.06     | 0.23    | 0.29    | 0.22    | 0.19    | 0.28    | 0.00     |
| GH45       | 0.00    | 0.00    | 0.00    | 0.00    | 0.02    | 0.00    | 0.00    | 0.00    | 0.00    | 0.00     | 0.00    | 0.00    | 0.00    | 0.00    | 0.00    | 0.00     |
| GT34       | 0.04    | 0.00    | 0.00    | 0.00    | 0.00    | 0.00    | 0.18    | 0.00    | 0.00    | 0.00     | 0.00    | 0.00    | 0.00    | 0.00    | 0.08    | 0.03     |
| PL14       | 0.00    | 0.00    | 0.00    | 0.00    | 0.00    | 0.00    | 0.00    | 0.00    | 0.00    | 0.00     | 0.00    | 0.00    | 0.00    | 0.00    | 0.00    | 0.00     |
| GH19       | 0.04    | 0.00    | 0.00    | 0.00    | 0.00    | 0.21    | 0.00    | 0.00    | 0.04    | 0.02     | 0.02    | 0.04    | 0.06    | 0.08    | 0.08    | 0.15     |
| GH118      | 0.00    | 0.00    | 0.00    | 0.00    | 0.00    | 0.00    | 0.00    | 0.00    | 0.00    | 0.00     | 0.00    | 0.00    | 0.00    | 0.00    | 0.00    | 0.00     |
| GH82       | 0.00    | 0.00    | 0.00    | 0.00    | 0.00    | 0.00    | 0.00    | 0.00    | 0.00    | 0.00     | 0.00    | 0.00    | 0.00    | 0.00    | 0.00    | 0.00     |
| GH76       | 0.20    | 0.07    | 0.23    | 0.14    | 0.21    | 0.00    | 0.00    | 0.00    | 0.00    | 0.00     | 0.02    | 0.05    | 0.08    | 0.01    | 0.00    | 0.00     |
| GT4        | 2.77    | 2.27    | 2.55    | 2.33    | 2.67    | 1.40    | 1.64    | 1.64    | 1.50    | 1.51     | 4.45    | 6.20    | 5.55    | 4.09    | 5.21    | 5.57     |
| GT87       | 0.00    | 0.00    | 0.03    | 0.00    | 0.00    | 0.04    | 0.00    | 0.15    | 0.04    | 0.00     | 0.00    | 0.02    | 0.00    | 0.01    | 0.01    | 0.00     |
| GH24       | 0.24    | 0.19    | 0.15    | 0.11    | 0.19    | 0.38    | 0.00    | 0.00    | 0.41    | 0.49     | 0.43    | 0.27    | 0.49    | 0.48    | 0.22    | 0.30     |
| GH90       | 0.00    | 0.00    | 0.00    | 0.00    | 0.00    | 0.00    | 0.00    | 0.00    | 0.04    | 0.00     | 0.00    | 0.00    | 0.00    | 0.00    | 0.00    | 0.00     |
| GH57       | 0.16    | 0.24    | 0.05    | 0.11    | 0.12    | 0.00    | 0.00    | 0.00    | 0.04    | 0.25     | 0.34    | 0.57    | 0.67    | 0.59    | 0.30    | 0.00     |
| GH36       | 0.67    | 0.80    | 0.86    | 0.95    | 0.88    | 0.59    | 1.91    | 1.34    | 0.61    | 1.02     | 1.70    | 2.63    | 2.77    | 1.78    | 3.51    | 1.98     |
| GT46       | 0.00    | 0.00    | 0.00    | 0.00    | 0.00    | 0.00    | 0.00    | 0.00    | 0.00    | 0.00     | 0.00    | 0.00    | 0.00    | 0.00    | 0.00    | 0.00     |
| GH66       | 0.00    | 0.02    | 0.03    | 0.06    | 0.07    | 0.13    | 0.00    | 0.00    | 0.00    | 0.12     | 0.19    | 0.09    | 0.20    | 0.29    | 0.20    | 0.12     |

## Normalized\_abundance\_2

| CAZY_group | JP-AD-7 | JP-AD-8 | JP-AD-9 | JP-CH-1 | JP-CH-2 | JP-IN-1 | JP-IN-2 | JP-IN-3 | JP-IN-4 | IN-CH-16 | MA-AD-1 | MA-AD-2 | MA-AD-3 | MA-AD-4 | MA-IN-1 | MA-IN-10 |      |
|------------|---------|---------|---------|---------|---------|---------|---------|---------|---------|----------|---------|---------|---------|---------|---------|----------|------|
| GH48       | 0.00    | 0.00    | 0.00    | 0.00    | 0.00    | 0.02    | 0.00    | 0.00    | 0.00    | 0.00     | 0.00    | 0.02    | 0.02    | 0.06    | 0.00    | 0.00     | 0.00 |
| GT53       | 0.00    | 0.00    | 0.00    | 0.00    | 0.00    | 0.00    | 0.00    | 0.00    | 0.00    | 0.00     | 0.00    | 0.00    | 0.00    | 0.00    | 0.00    | 0.00     | 0.00 |
| GH60       | 0.00    | 0.00    | 0.00    | 0.00    | 0.00    | 0.00    | 0.00    | 0.00    | 0.00    | 0.00     | 0.00    | 0.00    | 0.00    | 0.00    | 0.00    | 0.00     | 0.00 |
| GT31       | 0.00    | 0.00    | 0.00    | 0.00    | 0.00    | 0.00    | 0.00    | 0.00    | 0.00    | 0.08     | 0.00    | 0.00    | 0.00    | 0.00    | 0.00    | 0.00     | 0.00 |
| GH105      | 0.36    | 0.53    | 0.71    | 0.67    | 0.83    | 0.25    | 0.09    | 0.00    | 0.00    | 0.32     | 0.39    | 0.53    | 0.75    | 0.78    | 0.56    | 0.61     | 0.00 |
| GT23       | 0.00    | 0.00    | 0.00    | 0.00    | 0.00    | 0.00    | 0.00    | 0.00    | 0.00    | 0.00     | 0.00    | 0.00    | 0.00    | 0.00    | 0.00    | 0.00     | 0.00 |
| GH11       | 0.00    | 0.00    | 0.00    | 0.00    | 0.00    | 0.00    | 0.00    | 0.00    | 0.00    | 0.00     | 0.00    | 0.02    | 0.02    | 0.04    | 0.00    | 0.00     | 0.00 |
| GT38       | 0.00    | 0.00    | 0.00    | 0.00    | 0.00    | 0.00    | 0.00    | 0.00    | 0.00    | 0.08     | 0.00    | 0.00    | 0.00    | 0.00    | 0.00    | 0.00     | 0.00 |
| GT43       | 0.00    | 0.00    | 0.00    | 0.00    | 0.00    | 0.00    | 0.00    | 0.00    | 0.00    | 0.00     | 0.00    | 0.00    | 0.00    | 0.00    | 0.00    | 0.00     | 0.00 |
| GH99       | 0.00    | 0.00    | 0.05    | 0.00    | 0.00    | 0.00    | 0.00    | 0.00    | 0.00    | 0.00     | 0.00    | 0.02    | 0.00    | 0.00    | 0.00    | 0.00     | 0.00 |
| GH38       | 0.12    | 0.29    | 0.25    | 0.45    | 0.49    | 0.04    | 1.37    | 0.95    | 0.81    | 0.08     | 0.23    | 0.33    | 0.31    | 0.27    | 1.37    | 4.62     | 0.00 |
| GH109      | 0.40    | 0.24    | 0.35    | 0.20    | 0.49    | 0.00    | 0.00    | 0.05    | 0.08    | 0.20     | 0.28    | 0.33    | 0.33    | 0.25    | 0.16    | 0.00     | 0.00 |
| GH2        | 4.86    | 4.28    | 4.93    | 3.67    | 5.50    | 1.23    | 2.28    | 1.94    | 2.03    | 3.87     | 6.81    | 7.49    | 7.37    | 6.42    | 8.37    | 6.27     | 0.00 |
| GT28       | 0.47    | 0.46    | 0.33    | 0.56    | 0.26    | 0.55    | 0.27    | 0.30    | 0.37    | 0.35     | 1.12    | 1.21    | 0.78    | 0.79    | 1.29    | 0.91     | 0.00 |
| GH42       | 0.20    | 0.24    | 0.51    | 0.28    | 0.21    | 0.68    | 1.64    | 0.75    | 0.57    | 0.02     | 0.57    | 0.60    | 0.29    | 0.41    | 2.20    | 4.32     | 0.00 |
| GT58       | 0.00    | 0.00    | 0.00    | 0.00    | 0.00    | 0.00    | 0.00    | 0.00    | 0.00    | 0.00     | 0.00    | 0.00    | 0.00    | 0.00    | 0.00    | 0.00     | 0.00 |
| GH61       | 0.00    | 0.00    | 0.00    | 0.00    | 0.00    | 0.00    | 0.00    | 0.00    | 0.00    | 0.00     | 0.00    | 0.00    | 0.00    | 0.00    | 0.00    | 0.00     | 0.00 |
| GH80       | 0.00    | 0.00    | 0.00    | 0.00    | 0.00    | 0.00    | 0.00    | 0.00    | 0.00    | 0.00     | 0.00    | 0.00    | 0.00    | 0.00    | 0.00    | 0.00     | 0.00 |
| GH98       | 0.00    | 0.00    | 0.08    | 0.00    | 0.00    | 0.00    | 0.00    | 0.00    | 0.00    | 0.00     | 0.12    | 0.04    | 0.12    | 0.05    | 0.05    | 0.00     | 0.00 |
| GH6        | 0.00    | 0.00    | 0.00    | 0.00    | 0.00    | 0.00    | 0.00    | 0.00    | 0.00    | 0.00     | 0.00    | 0.00    | 0.00    | 0.01    | 0.00    | 0.00     | 0.00 |
| GT1        | 0.12    | 0.02    | 0.03    | 0.03    | 0.02    | 0.04    | 0.09    | 0.10    | 0.04    | 0.02     | 0.07    | 0.07    | 0.08    | 0.12    | 0.04    | 0.06     | 0.00 |
| GH28       | 1.26    | 1.11    | 1.11    | 0.73    | 0.77    | 0.17    | 0.09    | 0.15    | 0.24    | 1.13     | 2.13    | 1.66    | 2.31    | 1.46    | 1.78    | 0.30     | 0.00 |
| GT42       | 0.00    | 0.00    | 0.00    | 0.00    | 0.00    | 0.00    | 0.00    | 0.00    | 0.00    | 0.00     | 0.00    | 0.00    | 0.00    | 0.00    | 0.00    | 0.00     | 0.00 |
| GH128      | 0.00    | 0.00    | 0.00    | 0.00    | 0.00    | 0.00    | 0.00    | 0.00    | 0.00    | 0.00     | 0.00    | 0.00    | 0.00    | 0.00    | 0.00    | 0.00     | 0.00 |
| CE12       | 0.08    | 0.02    | 0.20    | 0.14    | 0.14    | 0.00    | 0.09    | 0.00    | 0.00    | 0.37     | 0.37    | 0.26    | 0.33    | 0.44    | 0.40    | 0.00     | 0.00 |
| CE16       | 0.00    | 0.00    | 0.00    | 0.00    | 0.00    | 0.00    | 0.00    | 0.00    | 0.00    | 0.00     | 0.00    | 0.00    | 0.00    | 0.00    | 0.00    | 0.00     | 0.00 |
| GT89       | 0.00    | 0.00    | 0.00    | 0.00    | 0.00    | 0.00    | 0.00    | 0.00    | 0.00    | 0.00     | 0.00    | 0.00    | 0.00    | 0.00    | 0.00    | 0.00     | 0.00 |
| GT11       | 0.08    | 0.15    | 0.08    | 0.08    | 0.02    | 0.00    | 0.00    | 0.00    | 0.00    | 0.04     | 0.02    | 0.04    | 0.16    | 0.04    | 0.03    | 0.00     | 0.00 |
| GT77       | 0.00    | 0.00    | 0.00    | 0.00    | 0.00    | 0.00    | 0.00    | 0.00    | 0.16    | 0.29     | 0.00    | 0.00    | 0.00    | 0.00    | 0.00    | 0.30     | 0.00 |
| GT55       | 0.00    | 0.00    | 0.00    | 0.00    | 0.00    | 0.00    | 0.00    | 0.00    | 0.00    | 0.00     | 0.00    | 0.00    | 0.00    | 0.00    | 0.00    | 0.00     | 0.00 |
| GT18       | 0.00    | 0.00    | 0.00    | 0.00    | 0.00    | 0.00    | 0.00    | 0.00    | 0.00    | 0.00     | 0.00    | 0.00    | 0.00    | 0.00    | 0.00    | 0.00     | 0.00 |
| GH87       | 0.00    | 0.00    | 0.00    | 0.00    | 0.00    | 0.00    | 0.00    | 0.00    | 0.00    | 0.00     | 0.02    | 0.02    | 0.00    | 0.04    | 0.00    | 0.03     | 0.00 |
| PL5        | 0.00    | 0.00    | 0.00    | 0.00    | 0.00    | 0.04    | 0.00    | 0.00    | 0.00    | 0.00     | 0.00    | 0.00    | 0.00    | 0.00    | 0.00    | 0.00     | 0.00 |
| GH22       | 0.00    | 0.00    | 0.00    | 0.00    | 0.00    | 0.00    | 0.00    | 0.00    | 0.00    | 0.00     | 0.00    | 0.02    | 0.00    | 0.00    | 0.00    | 0.00     | 0.00 |
| CE2        | 0.00    | 0.10    | 0.05    | 0.06    | 0.05    | 0.00    | 0.00    | 0.15    | 0.08    | 0.04     | 0.21    | 0.18    | 0.08    | 0.27    | 0.16    | 0.00     | 0.00 |
| GH120      | 0.04    | 0.12    | 0.05    | 0.17    | 0.02    | 0.00    | 0.00    | 0.05    | 0.08    | 0.00     | 0.09    | 0.29    | 0.08    | 0.07    | 0.25    | 0.00     | 0.00 |
| GH73       | 0.87    | 0.65    | 0.46    | 0.65    | 0.49    | 0.47    | 1.00    | 0.40    | 0.69    | 0.63     | 0.89    | 1.11    | 1.29    | 1.19    | 1.08    | 0.82     | 0.00 |
| GT17       | 0.00    | 0.00    | 0.00    | 0.00    | 0.00    | 0.00    | 0.00    | 0.00    | 0.00    | 0.00     | 0.00    | 0.04    | 0.00    | 0.01    | 0.00    | 0.00     | 0.00 |
| GH124      | 0.00    | 0.00    | 0.00    | 0.00    | 0.00    | 0.00    | 0.00    | 0.00    | 0.00    | 0.00     | 0.00    | 0.00    | 0.00    | 0.00    | 0.00    | 0.00     | 0.00 |
| GH54       | 0.00    | 0.00    | 0.00    | 0.00    | 0.00    | 0.00    | 0.00    | 0.00    | 0.00    | 0.00     | 0.00    | 0.00    | 0.04    | 0.00    | 0.00    | 0.00     | 0.00 |
| GH100      | 0.00    | 0.00    | 0.00    | 0.00    | 0.00    | 0.00    | 0.00    | 0.00    | 0.00    | 0.00     | 0.00    | 0.00    | 0.00    | 0.00    | 0.00    | 0.00     | 0.00 |
| GH113      | 0.00    | 0.00    | 0.00    | 0.00    | 0.02    | 0.04    | 0.00    | 0.00    | 0.04    | 0.00     | 0.02    | 0.15    | 0.04    | 0.01    | 0.00    | 0.00     | 0.00 |
| GT5        | 0.47    | 0.44    | 0.56    | 0.56    | 0.49    | 0.34    | 0.09    | 0.35    | 0.16    | 0.35     | 1.31    | 1.85    | 1.12    | 1.08    | 0.67    | 0.24     | 0.00 |
| GH94       | 0.16    | 0.60    | 0.43    | 0.28    | 0.44    | 0.04    | 0.18    | 0.05    | 0.28    | 0.39     | 1.31    | 1.94    | 1.63    | 1.26    | 0.55    | 0.00     | 0.00 |
| GT66       | 0.00    | 0.00    | 0.00    | 0.00    | 0.00    | 0.00    | 0.00    | 0.00    | 0.00    | 0.00     | 0.02    | 0.04    | 0.00    | 0.01    | 0.00    | 0.00     | 0.00 |
| GT94       | 0.00    | 0.00    | 0.00    | 0.00    | 0.00    | 0.00    | 0.00    | 0.00    | 0.00    | 0.00     | 0.00    | 0.00    | 0.00    | 0.00    | 0.00    | 0.00     | 0.00 |
| GH58       | 0.00    | 0.00    | 0.00    | 0.00    | 0.02    | 0.00    | 0.00    | 0.00    | 0.08    | 0.00     | 0.00    | 0.00    | 0.00    | 0.00    | 0.00    | 0.00     | 0.00 |
| GH1        | 0.47    | 0.70    | 1.29    | 0.70    | 0.46    | 2.59    | 2.64    | 2.19    | 2.07    | 0.10     | 1.45    | 1.43    | 0.92    | 0.63    | 2.00    | 0.33     | 0.00 |
| PL22       | 0.00    | 0.00    | 0.00    | 0.00    | 0.00    | 0.13    | 0.00    | 0.00    | 0.12    | 0.00     | 0.00    | 0.00    | 0.00    | 0.00    | 0.00    | 0.00     | 0.00 |
| GT9        | 0.28    | 0.12    | 0.15    | 0.03    | 0.21    | 0.55    | 0.18    | 0.00    | 0.16    | 0.29     | 0.41    | 0.37    | 0.43    | 0.32    | 0.51    | 0.24     | 0.00 |

## Normalized\_abundance\_2

| CAZY_group | JP-AD-7 | JP-AD-8 | JP-AD-9 | JP-CH-1 | JP-CH-2 | JP-IN-1 | JP-IN-2 | JP-IN-3 | JP-IN-4 | IN-CH-16 | MA-AD-1 | MA-AD-2 | MA-AD-3 | MA-AD-4 | MA-IN-1 | MA-IN-10 |
|------------|---------|---------|---------|---------|---------|---------|---------|---------|---------|----------|---------|---------|---------|---------|---------|----------|
| GT76       | 0.00    | 0.00    | 0.00    | 0.00    | 0.00    | 0.00    | 0.00    | 0.00    | 0.00    | 0.00     | 0.00    | 0.00    | 0.00    | 0.00    | 0.00    | 0.00     |
| GT32       | 0.20    | 0.12    | 0.10    | 0.08    | 0.08    | 0.09    | 0.00    | 0.00    | 0.00    | 0.04     | 0.12    | 0.12    | 0.24    | 0.16    | 0.09    | 0.30     |
| GT47       | 0.00    | 0.07    | 0.08    | 0.08    | 0.08    | 0.02    | 0.04    | 0.09    | 0.00    | 0.16     | 0.04    | 0.28    | 0.42    | 0.27    | 0.20    | 0.45     |
| GH84       | 0.12    | 0.02    | 0.13    | 0.03    | 0.12    | 0.12    | 0.00    | 0.00    | 0.00    | 0.00     | 0.29    | 0.25    | 0.22    | 0.12    | 0.13    | 0.37     |
| GH83       | 0.00    | 0.00    | 0.00    | 0.00    | 0.00    | 0.00    | 0.00    | 0.00    | 0.00    | 0.00     | 0.00    | 0.00    | 0.00    | 0.00    | 0.00    | 0.00     |
| GT59       | 0.00    | 0.00    | 0.00    | 0.00    | 0.00    | 0.00    | 0.00    | 0.00    | 0.00    | 0.00     | 0.00    | 0.00    | 0.00    | 0.00    | 0.00    | 0.00     |
| GH34       | 0.00    | 0.00    | 0.00    | 0.00    | 0.00    | 0.00    | 0.00    | 0.00    | 0.00    | 0.00     | 0.00    | 0.00    | 0.00    | 0.00    | 0.00    | 0.00     |
| GT14       | 0.00    | 0.10    | 0.08    | 0.06    | 0.05    | 0.05    | 0.00    | 0.00    | 0.00    | 0.00     | 0.04    | 0.05    | 0.07    | 0.10    | 0.13    | 0.11     |
| GH47       | 0.00    | 0.00    | 0.00    | 0.00    | 0.00    | 0.00    | 0.00    | 0.00    | 0.00    | 0.00     | 0.00    | 0.00    | 0.00    | 0.06    | 0.00    | 0.00     |
| GH97       | 0.91    | 0.82    | 0.83    | 0.87    | 1.21    | 1.21    | 0.00    | 0.00    | 0.00    | 0.08     | 1.41    | 2.48    | 1.21    | 3.10    | 2.07    | 1.73     |
| GH50       | 0.08    | 0.02    | 0.08    | 0.03    | 0.05    | 0.05    | 0.00    | 0.00    | 0.00    | 0.00     | 0.00    | 0.02    | 0.00    | 0.04    | 0.01    | 0.00     |
| GT26       | 0.04    | 0.15    | 0.23    | 0.25    | 0.26    | 0.26    | 0.38    | 0.09    | 0.15    | 0.24     | 0.23    | 0.43    | 0.46    | 0.39    | 0.39    | 0.49     |
| GH18       | 0.16    | 0.51    | 0.58    | 0.48    | 0.60    | 0.60    | 0.30    | 0.09    | 0.20    | 0.53     | 0.06    | 0.66    | 1.01    | 0.59    | 0.66    | 0.76     |
| GH37       | 0.00    | 0.00    | 0.00    | 0.00    | 0.00    | 0.00    | 0.64    | 0.00    | 0.00    | 0.12     | 0.02    | 0.00    | 0.04    | 0.00    | 0.00    | 0.00     |
| PL13       | 0.04    | 0.05    | 0.03    | 0.06    | 0.12    | 0.12    | 0.00    | 0.00    | 0.00    | 0.00     | 0.00    | 0.00    | 0.00    | 0.00    | 0.00    | 0.00     |
| GH27       | 0.24    | 0.22    | 0.28    | 0.34    | 0.35    | 0.35    | 0.08    | 0.18    | 0.15    | 0.04     | 0.27    | 0.50    | 0.55    | 0.51    | 0.36    | 0.28     |
| GT54       | 0.00    | 0.00    | 0.00    | 0.00    | 0.00    | 0.00    | 0.00    | 0.00    | 0.00    | 0.00     | 0.00    | 0.00    | 0.00    | 0.00    | 0.00    | 0.00     |
| GT91       | 0.00    | 0.00    | 0.00    | 0.00    | 0.00    | 0.00    | 0.00    | 0.00    | 0.00    | 0.00     | 0.00    | 0.00    | 0.00    | 0.00    | 0.00    | 0.00     |
| GT72       | 0.00    | 0.00    | 0.00    | 0.00    | 0.00    | 0.00    | 0.00    | 0.00    | 0.00    | 0.00     | 0.00    | 0.00    | 0.00    | 0.00    | 0.00    | 0.00     |
| GH67       | 0.12    | 0.05    | 0.03    | 0.08    | 0.07    | 0.07    | 0.13    | 0.09    | 0.00    | 0.04     | 0.25    | 0.28    | 0.33    | 0.20    | 0.19    | 0.36     |
| GH12       | 0.00    | 0.00    | 0.00    | 0.00    | 0.00    | 0.00    | 0.00    | 0.00    | 0.00    | 0.00     | 0.00    | 0.00    | 0.02    | 0.02    | 0.00    | 0.00     |
| GH91       | 0.00    | 0.05    | 0.00    | 0.00    | 0.00    | 0.00    | 0.04    | 0.00    | 0.00    | 0.00     | 0.00    | 0.00    | 0.02    | 0.00    | 0.00    | 0.00     |
| GT69       | 0.00    | 0.00    | 0.00    | 0.00    | 0.00    | 0.00    | 0.00    | 0.00    | 0.00    | 0.00     | 0.00    | 0.00    | 0.00    | 0.00    | 0.00    | 0.00     |
| GH106      | 0.28    | 0.24    | 0.33    | 0.20    | 0.35    | 0.35    | 0.00    | 0.00    | 0.00    | 0.00     | 0.31    | 0.48    | 0.22    | 0.69    | 0.43    | 0.42     |
| GT62       | 0.00    | 0.00    | 0.00    | 0.00    | 0.00    | 0.00    | 0.00    | 0.00    | 0.00    | 0.00     | 0.00    | 0.00    | 0.00    | 0.00    | 0.00    | 0.00     |
| GH17       | 0.00    | 0.00    | 0.00    | 0.00    | 0.00    | 0.00    | 0.00    | 0.00    | 0.00    | 0.00     | 0.00    | 0.00    | 0.00    | 0.00    | 0.00    | 0.00     |
| GH88       | 0.40    | 0.17    | 0.53    | 0.22    | 0.42    | 0.42    | 0.08    | 0.00    | 0.10    | 0.65     | 0.18    | 0.14    | 0.24    | 0.24    | 0.27    | 0.15     |
| CE5        | 0.00    | 0.00    | 0.00    | 0.00    | 0.00    | 0.00    | 0.00    | 0.00    | 0.00    | 0.00     | 0.00    | 0.00    | 0.00    | 0.00    | 0.00    | 0.00     |
| GT8        | 0.24    | 0.24    | 0.13    | 0.31    | 0.12    | 0.12    | 0.17    | 0.09    | 0.10    | 0.41     | 0.08    | 0.67    | 0.42    | 0.35    | 0.13    | 0.32     |
| GT50       | 0.00    | 0.00    | 0.00    | 0.00    | 0.00    | 0.00    | 0.00    | 0.00    | 0.00    | 0.00     | 0.00    | 0.00    | 0.00    | 0.00    | 0.00    | 0.00     |
| GT20       | 0.12    | 0.15    | 0.05    | 0.00    | 0.07    | 0.07    | 0.34    | 0.00    | 0.15    | 0.08     | 0.00    | 0.02    | 0.00    | 0.00    | 0.00    | 0.04     |
| PL9        | 0.08    | 0.02    | 0.23    | 0.06    | 0.12    | 0.12    | 0.30    | 0.18    | 0.20    | 0.00     | 0.02    | 0.43    | 0.24    | 0.33    | 0.17    | 0.11     |
| GH55       | 0.00    | 0.10    | 0.03    | 0.08    | 0.05    | 0.05    | 0.00    | 0.00    | 0.00    | 0.00     | 0.02    | 0.00    | 0.02    | 0.06    | 0.05    | 0.01     |
| GH64       | 0.00    | 0.00    | 0.00    | 0.00    | 0.00    | 0.00    | 0.00    | 0.00    | 0.00    | 0.00     | 0.00    | 0.00    | 0.00    | 0.00    | 0.00    | 0.00     |
| GH127      | 0.47    | 0.41    | 0.58    | 0.48    | 0.51    | 0.51    | 0.25    | 0.27    | 0.90    | 0.32     | 0.57    | 0.58    | 0.71    | 1.00    | 0.51    | 1.02     |
| GH103      | 0.04    | 0.00    | 0.00    | 0.00    | 0.05    | 0.05    | 0.34    | 0.00    | 0.00    | 0.04     | 0.00    | 0.00    | 0.05    | 0.00    | 0.00    | 0.03     |
| GH3        | 2.85    | 3.97    | 3.54    | 2.64    | 3.50    | 3.50    | 1.49    | 2.18    | 2.14    | 2.07     | 3.07    | 6.66    | 5.88    | 7.45    | 4.96    | 7.26     |
| GT45       | 0.00    | 0.00    | 0.00    | 0.00    | 0.00    | 0.00    | 0.00    | 0.00    | 0.00    | 0.00     | 0.00    | 0.00    | 0.00    | 0.00    | 0.00    | 0.00     |
| GT74       | 0.00    | 0.00    | 0.00    | 0.00    | 0.00    | 0.00    | 0.00    | 0.00    | 0.00    | 0.00     | 0.00    | 0.00    | 0.00    | 0.00    | 0.00    | 0.00     |
| GT90       | 0.00    | 0.00    | 0.00    | 0.00    | 0.00    | 0.00    | 0.00    | 0.00    | 0.00    | 0.00     | 0.00    | 0.00    | 0.00    | 0.00    | 0.04    | 0.01     |
| GH116      | 0.00    | 0.07    | 0.03    | 0.06    | 0.21    | 0.21    | 0.00    | 0.00    | 0.00    | 0.00     | 0.00    | 0.02    | 0.00    | 0.04    | 0.11    | 0.03     |
| GH31       | 1.23    | 0.99    | 1.79    | 1.40    | 1.65    | 1.65    | 0.89    | 1.27    | 2.04    | 0.89     | 1.21    | 2.68    | 2.69    | 3.18    | 2.52    | 2.65     |
| GT12       | 0.00    | 0.00    | 0.00    | 0.00    | 0.00    | 0.00    | 0.00    | 0.00    | 0.00    | 0.00     | 0.00    | 0.00    | 0.02    | 0.00    | 0.00    | 0.00     |
| CE1        | 0.43    | 0.41    | 0.48    | 0.53    | 0.63    | 0.63    | 0.25    | 0.09    | 0.00    | 0.12     | 0.18    | 1.17    | 0.66    | 0.80    | 0.62    | 0.53     |
| GH121      | 0.08    | 0.10    | 0.03    | 0.20    | 0.05    | 0.05    | 0.00    | 0.27    | 0.35    | 0.08     | 0.00    | 0.00    | 0.00    | 0.00    | 0.00    | 0.44     |
| GH79       | 0.00    | 0.00    | 0.03    | 0.00    | 0.00    | 0.00    | 0.00    | 0.00    | 0.00    | 0.00     | 0.00    | 0.04    | 0.02    | 0.00    | 0.03    | 0.00     |
| GT73       | 0.00    | 0.00    | 0.00    | 0.00    | 0.00    | 0.00    | 0.00    | 0.00    | 0.00    | 0.04     | 0.00    | 0.00    | 0.00    | 0.00    | 0.00    | 0.00     |
| GH77       | 0.55    | 0.89    | 0.68    | 0.95    | 0.58    | 0.58    | 0.47    | 0.91    | 0.85    | 0.49     | 0.59    | 1.77    | 2.17    | 2.39    | 1.89    | 2.98     |
| PL17       | 0.00    | 0.07    | 0.10    | 0.00    | 0.05    | 0.05    | 0.08    | 0.00    | 0.00    | 0.00     | 0.00    | 0.00    | 0.00    | 0.00    | 0.00    | 0.00     |
| PL8        | 0.28    | 0.27    | 0.23    | 0.25    | 0.30    | 0.30    | 0.00    | 0.00    | 0.00    | 0.04     | 0.00    | 0.05    | 0.22    | 0.02    | 0.04    | 0.08     |

## Normalized\_abundance\_2

| CAZY_group | JP-AD-7 | JP-AD-8 | JP-AD-9 | JP-CH-1 | JP-CH-2 | JP-IN-1 | JP-IN-2 | JP-IN-3 | JP-IN-4 | IN-CH-16 | MA-AD-1 | MA-AD-2 | MA-AD-3 | MA-AD-4 | MA-IN-1 | MA-IN-10 |
|------------|---------|---------|---------|---------|---------|---------|---------|---------|---------|----------|---------|---------|---------|---------|---------|----------|
| CE9        | 0.47    | 0.53    | 0.40    | 0.25    | 0.26    | 0.55    | 1.00    | 0.75    | 0.37    | 0.14     | 0.60    | 0.99    | 0.59    | 0.52    | 1.02    | 1.13     |
| CE15       | 0.00    | 0.02    | 0.00    | 0.03    | 0.02    | 0.00    | 0.00    | 0.00    | 0.00    | 0.00     | 0.00    | 0.00    | 0.04    | 0.00    | 0.00    | 0.00     |
| GT79       | 0.00    | 0.00    | 0.00    | 0.00    | 0.00    | 0.00    | 0.00    | 0.00    | 0.00    | 0.00     | 0.00    | 0.00    | 0.00    | 0.00    | 0.00    | 0.00     |
| GT10       | 0.00    | 0.00    | 0.00    | 0.08    | 0.02    | 0.00    | 0.00    | 0.00    | 0.08    | 0.00     | 0.00    | 0.00    | 0.00    | 0.00    | 0.00    | 0.00     |
| GH119      | 0.00    | 0.00    | 0.00    | 0.00    | 0.00    | 0.00    | 0.00    | 0.00    | 0.00    | 0.00     | 0.00    | 0.04    | 0.08    | 0.00    | 0.00    | 0.00     |
| GH16       | 0.32    | 0.34    | 0.18    | 0.20    | 0.42    | 0.17    | 0.00    | 0.00    | 0.04    | 0.16     | 0.23    | 0.37    | 0.45    | 0.35    | 0.41    | 0.00     |
| GH43       | 3.56    | 2.52    | 2.63    | 3.31    | 3.90    | 1.19    | 2.55    | 4.13    | 1.58    | 3.34     | 5.12    | 3.31    | 6.20    | 4.52    | 7.57    | 0.67     |
| GH51       | 0.71    | 0.46    | 0.46    | 0.81    | 0.53    | 0.13    | 0.73    | 1.14    | 0.45    | 1.15     | 1.68    | 1.32    | 1.55    | 1.73    | 2.00    | 2.04     |
| GT35       | 1.03    | 1.16    | 1.06    | 1.23    | 0.74    | 0.93    | 0.46    | 0.95    | 0.73    | 0.80     | 2.48    | 3.51    | 2.79    | 1.94    | 3.07    | 2.62     |
| GT25       | 0.00    | 0.00    | 0.00    | 0.00    | 0.00    | 0.00    | 0.00    | 0.00    | 0.00    | 0.00     | 0.00    | 0.02    | 0.00    | 0.00    | 0.01    | 0.00     |
| GT2        | 6.05    | 6.09    | 5.44    | 4.60    | 6.17    | 6.67    | 4.92    | 6.76    | 3.57    | 4.87     | 11.45   | 11.91   | 13.22   | 10.05   | 15.03   | 18.92    |
| GT51       | 1.26    | 0.85    | 1.21    | 0.95    | 0.97    | 1.40    | 1.73    | 1.39    | 0.77    | 1.41     | 2.61    | 3.31    | 3.06    | 2.15    | 3.44    | 4.35     |
| GH107      | 0.00    | 0.00    | 0.00    | 0.00    | 0.00    | 0.00    | 0.00    | 0.00    | 0.00    | 0.00     | 0.00    | 0.00    | 0.00    | 0.00    | 0.00    | 0.00     |
| GH7        | 0.00    | 0.00    | 0.00    | 0.00    | 0.00    | 0.00    | 0.00    | 0.00    | 0.00    | 0.00     | 0.00    | 0.00    | 0.00    | 0.00    | 0.00    | 0.00     |
| GT7        | 0.00    | 0.00    | 0.00    | 0.00    | 0.00    | 0.00    | 0.00    | 0.00    | 0.00    | 0.00     | 0.00    | 0.00    | 0.00    | 0.00    | 0.00    | 0.00     |
| GT36       | 0.00    | 0.00    | 0.00    | 0.00    | 0.00    | 0.00    | 0.00    | 0.00    | 0.00    | 0.00     | 0.00    | 0.00    | 0.00    | 0.00    | 0.00    | 0.00     |
| PL7        | 0.00    | 0.00    | 0.00    | 0.00    | 0.00    | 0.00    | 0.00    | 0.00    | 0.00    | 0.00     | 0.00    | 0.00    | 0.02    | 0.00    | 0.00    | 0.00     |
| GH110      | 0.20    | 0.00    | 0.13    | 0.11    | 0.16    | 0.00    | 0.00    | 0.00    | 0.12    | 0.14     | 0.00    | 0.04    | 0.04    | 0.01    | 0.18    | 0.00     |
| GT21       | 0.00    | 0.00    | 0.00    | 0.00    | 0.00    | 0.00    | 0.00    | 0.00    | 0.00    | 0.00     | 0.00    | 0.00    | 0.00    | 0.00    | 0.00    | 0.00     |
| GH62       | 0.00    | 0.00    | 0.00    | 0.00    | 0.00    | 0.00    | 0.00    | 0.00    | 0.00    | 0.00     | 0.00    | 0.00    | 0.02    | 0.00    | 0.00    | 0.00     |
| GH125      | 0.20    | 0.29    | 0.03    | 0.31    | 0.26    | 0.00    | 0.46    | 0.30    | 0.12    | 0.31     | 0.21    | 0.27    | 0.25    | 0.31    | 0.30    | 0.61     |
| GH117      | 0.12    | 0.10    | 0.03    | 0.08    | 0.19    | 0.00    | 0.00    | 0.00    | 0.00    | 0.00     | 0.02    | 0.02    | 0.04    | 0.03    | 0.00    | 0.00     |
| GH68       | 0.00    | 0.00    | 0.00    | 0.03    | 0.00    | 0.00    | 0.00    | 0.00    | 0.00    | 0.00     | 0.02    | 0.04    | 0.00    | 0.01    | 0.00    | 0.06     |
| GH85       | 0.04    | 0.00    | 0.08    | 0.00    | 0.00    | 0.00    | 0.09    | 0.50    | 0.00    | 0.18     | 0.02    | 0.29    | 0.12    | 0.23    | 0.33    | 1.98     |
| GH92       | 2.13    | 2.03    | 1.37    | 1.46    | 2.39    | 0.04    | 0.55    | 0.10    | 0.00    | 1.35     | 0.78    | 1.57    | 1.51    | 1.61    | 0.90    | 0.15     |
| GH40       | 0.00    | 0.00    | 0.00    | 0.00    | 0.00    | 0.00    | 0.00    | 0.00    | 0.00    | 0.00     | 0.00    | 0.00    | 0.00    | 0.00    | 0.00    | 0.00     |
| GT49       | 0.00    | 0.00    | 0.00    | 0.00    | 0.00    | 0.00    | 0.00    | 0.00    | 0.00    | 0.00     | 0.00    | 0.00    | 0.00    | 0.01    | 0.00    | 0.00     |
| GH112      | 0.16    | 0.31    | 0.33    | 0.20    | 0.28    | 0.08    | 0.46    | 0.65    | 0.41    | 0.10     | 0.34    | 0.66    | 0.33    | 0.20    | 0.45    | 1.79     |
| GT67       | 0.00    | 0.00    | 0.00    | 0.00    | 0.00    | 0.00    | 0.00    | 0.00    | 0.00    | 0.00     | 0.00    | 0.00    | 0.00    | 0.00    | 0.00    | 0.00     |
| CE8        | 0.24    | 0.17    | 0.28    | 0.08    | 0.16    | 0.42    | 0.00    | 0.25    | 0.12    | 0.27     | 0.78    | 0.40    | 0.51    | 0.47    | 0.20    | 0.03     |
| GT86       | 0.00    | 0.00    | 0.00    | 0.00    | 0.00    | 0.00    | 0.00    | 0.00    | 0.00    | 0.00     | 0.00    | 0.00    | 0.00    | 0.00    | 0.00    | 0.00     |
| GH101      | 0.16    | 0.12    | 0.00    | 0.11    | 0.07    | 0.00    | 0.46    | 1.29    | 0.08    | 0.00     | 0.05    | 0.02    | 0.00    | 0.00    | 0.09    | 0.03     |
| GH81       | 0.04    | 0.00    | 0.00    | 0.00    | 0.00    | 0.08    | 0.00    | 0.00    | 0.00    | 0.00     | 0.00    | 0.02    | 0.02    | 0.00    | 0.00    | 0.00     |
| GT93       | 0.00    | 0.00    | 0.00    | 0.00    | 0.00    | 0.00    | 0.00    | 0.00    | 0.00    | 0.00     | 0.00    | 0.00    | 0.00    | 0.00    | 0.00    | 0.00     |
| GT63       | 0.00    | 0.00    | 0.00    | 0.00    | 0.00    | 0.00    | 0.00    | 0.00    | 0.00    | 0.00     | 0.00    | 0.00    | 0.00    | 0.00    | 0.00    | 0.00     |
| CE11       | 0.28    | 0.24    | 0.30    | 0.11    | 0.30    | 0.17    | 0.00    | 0.05    | 0.08    | 0.47     | 0.64    | 0.44    | 0.57    | 0.55    | 0.55    | 0.03     |
| GT19       | 0.12    | 0.15    | 0.05    | 0.06    | 0.21    | 0.08    | 0.00    | 0.00    | 0.16    | 0.35     | 0.35    | 0.55    | 0.55    | 0.28    | 0.41    | 0.12     |
| GT33       | 0.00    | 0.00    | 0.00    | 0.00    | 0.00    | 0.00    | 0.00    | 0.00    | 0.00    | 0.00     | 0.00    | 0.00    | 0.02    | 0.00    | 0.00    | 0.00     |
| GH21       | 0.00    | 0.00    | 0.00    | 0.00    | 0.00    | 0.00    | 0.00    | 0.00    | 0.00    | 0.00     | 0.00    | 0.00    | 0.00    | 0.00    | 0.00    | 0.00     |
| GT68       | 0.00    | 0.00    | 0.00    | 0.00    | 0.00    | 0.00    | 0.00    | 0.00    | 0.00    | 0.00     | 0.00    | 0.00    | 0.00    | 0.00    | 0.00    | 0.00     |
| GH89       | 0.24    | 0.05    | 0.15    | 0.06    | 0.19    | 0.13    | 0.00    | 0.00    | 0.00    | 0.25     | 0.28    | 0.20    | 0.47    | 0.29    | 0.37    | 0.00     |
| GT82       | 0.00    | 0.00    | 0.00    | 0.00    | 0.00    | 0.00    | 0.00    | 0.00    | 0.00    | 0.00     | 0.00    | 0.00    | 0.00    | 0.00    | 0.00    | 0.00     |
| GH30       | 0.24    | 0.07    | 0.38    | 0.22    | 0.35    | 0.00    | 0.09    | 0.35    | 0.00    | 0.14     | 0.21    | 0.18    | 0.31    | 0.16    | 0.91    | 0.94     |
| GH20       | 1.82    | 1.62    | 1.21    | 0.81    | 1.60    | 0.08    | 0.27    | 0.35    | 0.28    | 1.51     | 1.44    | 1.57    | 1.71    | 1.08    | 2.45    | 5.02     |
| GH52       | 0.00    | 0.00    | 0.00    | 0.00    | 0.00    | 0.00    | 0.00    | 0.00    | 0.00    | 0.00     | 0.00    | 0.00    | 0.00    | 0.00    | 0.00    | 0.00     |
| GT84       | 0.00    | 0.02    | 0.00    | 0.03    | 0.00    | 0.25    | 0.00    | 0.00    | 0.37    | 0.00     | 0.12    | 0.05    | 0.16    | 0.04    | 0.00    | 0.00     |
| GT15       | 0.00    | 0.00    | 0.00    | 0.00    | 0.00    | 0.00    | 0.00    | 0.00    | 0.00    | 0.00     | 0.00    | 0.00    | 0.00    | 0.00    | 0.00    | 0.00     |
| GH93       | 0.00    | 0.00    | 0.00    | 0.00    | 0.00    | 0.00    | 0.00    | 0.00    | 0.00    | 0.00     | 0.00    | 0.00    | 0.10    | 0.00    | 0.01    | 0.00     |
| PL16       | 0.00    | 0.00    | 0.00    | 0.00    | 0.00    | 0.00    | 0.00    | 0.00    | 0.00    | 0.00     | 0.00    | 0.00    | 0.00    | 0.00    | 0.00    | 0.00     |
| GH26       | 0.12    | 0.12    | 0.08    | 0.14    | 0.23    | 0.13    | 0.27    | 0.00    | 0.00    | 0.10     | 0.35    | 0.33    | 0.43    | 0.41    | 0.44    | 0.00     |

## Normalized\_abundance\_2

| CAZY_group | JP-AD-7 | JP-AD-8 | JP-AD-9 | JP-CH-1 | JP-CH-2 | JP-IN-1 | JP-IN-2 | JP-IN-3 | JP-IN-4 | IN-CH-16 | MA-AD-1 | MA-AD-2 | MA-AD-3 | MA-AD-4 | MA-IN-1 | MA-IN-10 |
|------------|---------|---------|---------|---------|---------|---------|---------|---------|---------|----------|---------|---------|---------|---------|---------|----------|
| GT75       | 0.00    | 0.00    | 0.00    | 0.00    | 0.00    | 0.00    | 0.00    | 0.00    | 0.00    | 0.00     | 0.00    | 0.00    | 0.00    | 0.00    | 0.00    | 0.00     |
| GH53       | 0.04    | 0.24    | 0.28    | 0.00    | 0.19    | 0.30    | 0.73    | 0.20    | 0.08    | 0.14     | 0.55    | 0.68    | 0.47    | 0.47    | 0.24    | 0.21     |
| GT88       | 0.00    | 0.00    | 0.00    | 0.00    | 0.00    | 0.00    | 0.00    | 0.00    | 0.00    | 0.00     | 0.00    | 0.00    | 0.00    | 0.00    | 0.00    | 0.00     |
| GT24       | 0.00    | 0.00    | 0.00    | 0.00    | 0.00    | 0.00    | 0.00    | 0.00    | 0.00    | 0.00     | 0.00    | 0.00    | 0.00    | 0.00    | 0.00    | 0.00     |
| GT81       | 0.00    | 0.00    | 0.00    | 0.00    | 0.00    | 0.00    | 0.00    | 0.00    | 0.00    | 0.00     | 0.00    | 0.00    | 0.00    | 0.00    | 0.00    | 0.00     |
| GH4        | 0.12    | 0.10    | 0.18    | 0.08    | 0.16    | 1.49    | 0.91    | 0.25    | 0.69    | 0.04     | 0.14    | 0.40    | 0.37    | 0.13    | 0.29    | 0.46     |
| GT78       | 0.00    | 0.00    | 0.00    | 0.00    | 0.00    | 0.00    | 0.00    | 0.00    | 0.00    | 0.00     | 0.00    | 0.00    | 0.00    | 0.00    | 0.00    | 0.00     |
| GH8        | 0.08    | 0.05    | 0.05    | 0.14    | 0.05    | 0.34    | 0.00    | 0.00    | 0.00    | 0.10     | 0.30    | 0.20    | 0.51    | 0.21    | 0.25    | 0.09     |
| GH70       | 0.00    | 0.00    | 0.00    | 0.11    | 0.00    | 0.00    | 0.00    | 0.00    | 0.00    | 0.00     | 0.09    | 0.24    | 0.06    | 0.00    | 0.03    | 0.27     |
| GH122      | 0.00    | 0.00    | 0.00    | 0.00    | 0.00    | 0.00    | 0.00    | 0.00    | 0.00    | 0.00     | 0.00    | 0.00    | 0.00    | 0.00    | 0.00    | 0.00     |
| GH74       | 0.00    | 0.05    | 0.00    | 0.00    | 0.02    | 0.00    | 0.00    | 0.00    | 0.00    | 0.00     | 0.04    | 0.26    | 0.24    | 0.19    | 0.00    | 0.00     |
| GT41       | 0.00    | 0.00    | 0.00    | 0.00    | 0.00    | 0.04    | 0.00    | 0.00    | 0.08    | 0.00     | 0.00    | 0.07    | 0.00    | 0.01    | 0.00    | 0.00     |
| PL1        | 0.43    | 0.19    | 0.38    | 0.17    | 0.19    | 0.00    | 0.00    | 0.00    | 0.00    | 0.27     | 0.46    | 0.20    | 0.55    | 0.58    | 0.29    | 0.00     |
| GH15       | 0.00    | 0.17    | 0.10    | 0.06    | 0.02    | 0.00    | 0.00    | 0.00    | 0.00    | 0.00     | 0.02    | 0.02    | 0.00    | 0.00    | 0.00    | 0.00     |
| GH32       | 0.79    | 0.56    | 0.78    | 0.42    | 0.72    | 0.93    | 0.73    | 0.80    | 0.81    | 0.70     | 0.99    | 1.41    | 0.88    | 0.82    | 1.75    | 1.46     |
| GH44       | 0.00    | 0.00    | 0.00    | 0.00    | 0.00    | 0.00    | 0.00    | 0.00    | 0.00    | 0.00     | 0.04    | 0.13    | 0.06    | 0.01    | 0.00    | 0.00     |
| GT6        | 0.00    | 0.00    | 0.00    | 0.03    | 0.00    | 0.00    | 0.00    | 0.00    | 0.00    | 0.00     | 0.00    | 0.00    | 0.00    | 0.00    | 0.00    | 0.00     |
| GH13       | 3.83    | 3.75    | 3.67    | 3.62    | 3.36    | 3.02    | 6.55    | 4.63    | 3.21    | 3.19     | 9.98    | 12.54   | 11.55   | 8.01    | 12.30   | 15.21    |
| GT80       | 0.00    | 0.00    | 0.00    | 0.00    | 0.00    | 0.21    | 0.00    | 0.00    | 0.08    | 0.00     | 0.00    | 0.02    | 0.00    | 0.00    | 0.01    | 0.06     |
| GH71       | 0.00    | 0.00    | 0.00    | 0.00    | 0.00    | 0.00    | 0.00    | 0.00    | 0.00    | 0.00     | 0.00    | 0.00    | 0.00    | 0.00    | 0.00    | 0.00     |
| GH63       | 0.20    | 0.19    | 0.13    | 0.11    | 0.28    | 0.17    | 0.18    | 0.00    | 0.04    | 0.08     | 0.14    | 0.22    | 0.06    | 0.31    | 0.18    | 0.21     |
| PL21       | 0.16    | 0.07    | 0.03    | 0.03    | 0.02    | 0.00    | 0.00    | 0.00    | 0.00    | 0.00     | 0.00    | 0.00    | 0.00    | 0.01    | 0.00    | 0.00     |
| GH65       | 0.36    | 0.24    | 0.28    | 0.28    | 0.21    | 0.25    | 0.55    | 0.25    | 0.49    | 0.00     | 0.19    | 0.22    | 0.20    | 0.08    | 0.29    | 0.06     |
| CE4        | 0.47    | 0.56    | 0.61    | 0.36    | 0.37    | 0.93    | 0.36    | 0.45    | 0.57    | 0.35     | 0.99    | 1.28    | 0.92    | 0.86    | 0.74    | 0.21     |
| CE14       | 0.04    | 0.00    | 0.00    | 0.00    | 0.00    | 0.04    | 0.00    | 0.00    | 0.00    | 0.02     | 0.00    | 0.00    | 0.06    | 0.03    | 0.00    | 0.00     |
| GH115      | 0.32    | 0.19    | 0.25    | 0.28    | 0.28    | 0.08    | 0.09    | 0.00    | 0.00    | 0.49     | 0.66    | 0.33    | 0.76    | 0.58    | 0.54    | 0.00     |
| GH104      | 0.00    | 0.00    | 0.00    | 0.00    | 0.00    | 0.04    | 0.00    | 0.00    | 0.12    | 0.00     | 0.00    | 0.00    | 0.00    | 0.00    | 0.00    | 0.00     |
| GH111      | 0.00    | 0.00    | 0.00    | 0.00    | 0.00    | 0.00    | 0.00    | 0.00    | 0.04    | 0.00     | 0.00    | 0.00    | 0.00    | 0.00    | 0.00    | 0.00     |
| GH95       | 0.91    | 0.46    | 0.68    | 0.48    | 0.77    | 0.00    | 0.27    | 0.20    | 0.16    | 0.92     | 1.35    | 1.35    | 2.00    | 1.42    | 2.47    | 2.07     |
| GT70       | 0.00    | 0.00    | 0.00    | 0.00    | 0.00    | 0.00    | 0.00    | 0.00    | 0.00    | 0.00     | 0.00    | 0.00    | 0.00    | 0.00    | 0.00    | 0.00     |
| CE10       | 0.28    | 0.17    | 0.20    | 0.25    | 0.30    | 0.51    | 0.00    | 0.20    | 0.37    | 0.02     | 0.19    | 0.49    | 0.31    | 0.08    | 0.45    | 0.24     |
| GH10       | 0.08    | 0.10    | 0.08    | 0.14    | 0.23    | 0.00    | 0.00    | 0.00    | 0.00    | 0.33     | 0.41    | 0.20    | 0.53    | 0.33    | 0.33    | 0.00     |
| GH130      | 0.16    | 0.39    | 0.25    | 0.28    | 0.42    | 0.00    | 0.00    | 0.00    | 0.08    | 0.25     | 0.39    | 0.84    | 0.82    | 0.55    | 0.20    | 0.00     |
| PL20       | 0.00    | 0.00    | 0.00    | 0.00    | 0.00    | 0.00    | 0.00    | 0.00    | 0.00    | 0.00     | 0.00    | 0.00    | 0.00    | 0.00    | 0.00    | 0.00     |
| GH69       | 0.00    | 0.00    | 0.00    | 0.00    | 0.00    | 0.00    | 0.00    | 0.00    | 0.00    | 0.00     | 0.00    | 0.00    | 0.00    | 0.00    | 0.00    | 0.00     |
| PL2        | 0.00    | 0.00    | 0.00    | 0.00    | 0.00    | 0.00    | 0.00    | 0.00    | 0.00    | 0.00     | 0.00    | 0.00    | 0.00    | 0.00    | 0.00    | 0.00     |
| GH49       | 0.00    | 0.00    | 0.00    | 0.00    | 0.00    | 0.00    | 0.00    | 0.00    | 0.00    | 0.00     | 0.00    | 0.00    | 0.00    | 0.00    | 0.00    | 0.00     |
| GH25       | 0.47    | 0.48    | 0.58    | 0.25    | 0.28    | 0.21    | 0.82    | 0.25    | 0.69    | 1.10     | 1.65    | 1.55    | 1.33    | 1.14    | 2.28    | 1.40     |
| GH59       | 0.00    | 0.00    | 0.03    | 0.00    | 0.02    | 0.08    | 0.09    | 0.05    | 0.00    | 0.00     | 0.00    | 0.02    | 0.08    | 0.01    | 0.00    | 0.00     |
| GH35       | 0.59    | 0.46    | 0.48    | 0.42    | 0.60    | 0.30    | 0.64    | 0.15    | 0.16    | 0.47     | 0.53    | 0.37    | 0.71    | 0.48    | 0.86    | 0.27     |
| GT39       | 0.00    | 0.00    | 0.00    | 0.00    | 0.00    | 0.00    | 0.00    | 0.10    | 0.00    | 0.00     | 0.02    | 0.11    | 0.08    | 0.01    | 0.00    | 0.03     |
| GT57       | 0.00    | 0.00    | 0.00    | 0.00    | 0.00    | 0.00    | 0.00    | 0.00    | 0.00    | 0.00     | 0.00    | 0.00    | 0.00    | 0.00    | 0.00    | 0.00     |
| GH129      | 0.04    | 0.00    | 0.05    | 0.08    | 0.02    | 0.00    | 0.09    | 0.10    | 0.16    | 0.00     | 0.02    | 0.02    | 0.02    | 0.01    | 0.28    | 1.46     |
| GT22       | 0.00    | 0.00    | 0.00    | 0.00    | 0.00    | 0.00    | 0.00    | 0.00    | 0.00    | 0.00     | 0.00    | 0.00    | 0.00    | 0.00    | 0.00    | 0.00     |
| PL12       | 0.08    | 0.19    | 0.05    | 0.11    | 0.09    | 0.00    | 0.09    | 0.00    | 0.00    | 0.02     | 0.02    | 0.16    | 0.04    | 0.04    | 0.05    | 0.00     |
| PL18       | 0.00    | 0.00    | 0.00    | 0.00    | 0.00    | 0.00    | 0.00    | 0.00    | 0.00    | 0.00     | 0.00    | 0.00    | 0.00    | 0.00    | 0.00    | 0.00     |
| GT92       | 0.00    | 0.00    | 0.00    | 0.00    | 0.00    | 0.00    | 0.00    | 0.00    | 0.00    | 0.00     | 0.00    | 0.00    | 0.00    | 0.00    | 0.00    | 0.00     |
| GT44       | 0.00    | 0.00    | 0.03    | 0.06    | 0.00    | 0.00    | 0.00    | 0.00    | 0.00    | 0.00     | 0.00    | 0.02    | 0.00    | 0.00    | 0.01    | 0.43     |
| GT29       | 0.00    | 0.00    | 0.00    | 0.00    | 0.00    | 0.00    | 0.00    | 0.00    | 0.00    | 0.00     | 0.00    | 0.00    | 0.00    | 0.00    | 0.00    | 0.00     |
| GT13       | 0.00    | 0.00    | 0.00    | 0.00    | 0.00    | 0.00    | 0.00    | 0.00    | 0.00    | 0.00     | 0.00    | 0.00    | 0.00    | 0.00    | 0.00    | 0.00     |

Normalized\_abundance\_2

| CAZY_group | JP-AD-7 | JP-AD-8 | JP-AD-9 | JP-CH-1 | JP-CH-2 | JP-IN-1 | JP-IN-2 | JP-IN-3 | JP-IN-4 | IN-CH-16 | MA-AD-1 | MA-AD-2 | MA-AD-3 | MA-AD-4 | MA-IN-1 | MA-IN-10 |      |
|------------|---------|---------|---------|---------|---------|---------|---------|---------|---------|----------|---------|---------|---------|---------|---------|----------|------|
| GT52       | 0.00    | 0.00    | 0.00    | 0.00    | 0.00    | 0.00    | 0.00    | 0.00    | 0.00    | 0.00     | 0.00    | 0.00    | 0.00    | 0.00    | 0.00    | 0.00     | 0.00 |
| GT64       | 0.00    | 0.00    | 0.00    | 0.00    | 0.00    | 0.00    | 0.00    | 0.00    | 0.00    | 0.00     | 0.00    | 0.00    | 0.00    | 0.00    | 0.00    | 0.00     | 0.00 |
| GT85       | 0.00    | 0.00    | 0.00    | 0.00    | 0.00    | 0.00    | 0.00    | 0.00    | 0.00    | 0.00     | 0.00    | 0.00    | 0.00    | 0.00    | 0.00    | 0.00     | 0.00 |
| GT16       | 0.00    | 0.00    | 0.00    | 0.00    | 0.00    | 0.00    | 0.00    | 0.00    | 0.00    | 0.00     | 0.00    | 0.00    | 0.00    | 0.00    | 0.00    | 0.00     | 0.00 |
| GH56       | 0.00    | 0.00    | 0.00    | 0.00    | 0.00    | 0.00    | 0.00    | 0.00    | 0.00    | 0.00     | 0.00    | 0.00    | 0.00    | 0.00    | 0.00    | 0.00     | 0.00 |
| GT60       | 0.00    | 0.00    | 0.00    | 0.00    | 0.00    | 0.00    | 0.00    | 0.00    | 0.00    | 0.00     | 0.00    | 0.00    | 0.00    | 0.00    | 0.00    | 0.00     | 0.00 |
| GH41       | 0.00    | 0.00    | 0.00    | 0.00    | 0.00    | 0.00    | 0.00    | 0.00    | 0.00    | 0.00     | 0.00    | 0.00    | 0.00    | 0.00    | 0.00    | 0.00     | 0.00 |
| CE7        | 0.20    | 0.12    | 0.10    | 0.17    | 0.19    | 0.04    | 0.09    | 0.10    | 0.10    | 0.08     | 0.31    | 0.14    | 0.05    | 0.20    | 0.24    | 0.28     | 0.00 |
| GH39       | 0.00    | 0.05    | 0.05    | 0.08    | 0.05    | 0.17    | 0.00    | 0.00    | 0.00    | 0.04     | 0.02    | 0.19    | 0.16    | 0.16    | 0.11    | 0.01     | 0.00 |
| GT30       | 0.43    | 0.39    | 0.10    | 0.14    | 0.37    | 0.42    | 0.09    | 0.00    | 0.00    | 0.28     | 0.43    | 0.51    | 0.35    | 0.33    | 0.35    | 0.61     | 0.46 |
| PL15       | 0.04    | 0.02    | 0.10    | 0.11    | 0.07    | 0.00    | 0.00    | 0.00    | 0.00    | 0.00     | 0.06    | 0.00    | 0.00    | 0.02    | 0.00    | 0.07     | 0.00 |
| GH102      | 0.00    | 0.02    | 0.05    | 0.00    | 0.05    | 0.64    | 0.00    | 0.00    | 0.10    | 0.08     | 0.02    | 0.05    | 0.13    | 0.02    | 0.07    | 0.01     | 0.09 |

Normalized\_abundance\_2

| CAZY_group | MA-IN-11 | MA-IN-12 | MA-IN-13 | MA-IN-14 | MA-IN-15 | MA-IN-16 | MA-IN-17 | MA-IN-18 | MA-IN-2 | MA-IN-3 | MA-IN-4 | MA-IN-5 | MA-IN-6 | MA-IN-7 | MA-IN-8 | MA-IN-9 |
|------------|----------|----------|----------|----------|----------|----------|----------|----------|---------|---------|---------|---------|---------|---------|---------|---------|
| GH29       | 4.20     | 3.97     | 2.06     | 3.02     | 3.55     | 2.31     | 1.91     | 2.64     | 1.84    | 1.82    | 1.16    | 2.46    | 2.46    | 3.20    | 2.85    | 3.24    |
| PL4        | 0.00     | 0.00     | 0.00     | 0.00     | 0.00     | 0.00     | 0.00     | 0.00     | 0.01    | 0.00    | 0.00    | 0.00    | 0.00    | 0.00    | 0.00    | 0.00    |
| GH23       | 2.07     | 2.07     | 1.93     | 2.77     | 2.16     | 2.23     | 1.82     | 2.01     | 1.76    | 2.11    | 2.06    | 2.86    | 2.90    | 2.25    | 2.94    | 2.28    |
| CE6        | 0.00     | 0.00     | 0.35     | 0.01     | 0.20     | 0.47     | 0.67     | 0.39     | 0.21    | 0.34    | 0.41    | 0.00    | 0.00    | 0.10    | 0.00    | 0.00    |
| GH72       | 0.41     | 0.49     | 0.50     | 0.40     | 0.32     | 0.38     | 0.56     | 0.38     | 0.40    | 0.37    | 0.43    | 0.53    | 0.42    | 0.41    | 0.68    | 0.37    |
| GH114      | 0.00     | 0.00     | 0.00     | 0.00     | 0.00     | 0.00     | 0.00     | 0.00     | 0.00    | 0.00    | 0.00    | 0.00    | 0.00    | 0.00    | 0.00    | 0.00    |
| GH78       | 0.00     | 0.00     | 0.83     | 1.92     | 1.26     | 0.27     | 0.33     | 0.44     | 0.39    | 0.98    | 0.78    | 0.83    | 0.89    | 0.26    | 0.02    | 0.13    |
| PL19       | 0.00     | 0.00     | 0.00     | 0.00     | 0.00     | 0.00     | 0.00     | 0.00     | 0.00    | 0.00    | 0.00    | 0.00    | 0.00    | 0.00    | 0.00    | 0.00    |
| GT27       | 0.00     | 0.00     | 0.00     | 0.00     | 0.00     | 0.00     | 0.00     | 0.00     | 0.00    | 0.00    | 0.00    | 0.00    | 0.00    | 0.00    | 0.00    | 0.00    |
| GH5        | 2.67     | 2.59     | 1.55     | 1.28     | 1.49     | 2.00     | 2.53     | 1.96     | 1.96    | 1.93    | 1.79    | 2.07    | 2.51    | 2.74    | 1.72    | 2.12    |
| GT40       | 0.00     | 0.00     | 0.00     | 0.00     | 0.00     | 0.00     | 0.00     | 0.00     | 0.00    | 0.00    | 0.00    | 0.00    | 0.00    | 0.00    | 0.00    | 0.00    |
| CE13       | 0.00     | 0.00     | 0.00     | 0.00     | 0.00     | 0.00     | 0.00     | 0.00     | 0.00    | 0.00    | 0.00    | 0.00    | 0.00    | 0.00    | 0.00    | 0.00    |
| GT37       | 0.00     | 0.00     | 0.00     | 0.00     | 0.00     | 0.00     | 0.00     | 0.00     | 0.00    | 0.00    | 0.00    | 0.00    | 0.00    | 0.00    | 0.00    | 0.00    |
| GH33       | 3.71     | 3.65     | 0.38     | 0.68     | 2.50     | 1.09     | 0.77     | 2.45     | 1.06    | 0.98    | 0.71    | 1.49    | 1.69    | 3.07    | 2.66    | 3.40    |
| GT65       | 0.00     | 0.00     | 0.00     | 0.00     | 0.00     | 0.00     | 0.00     | 0.00     | 0.00    | 0.00    | 0.00    | 0.00    | 0.00    | 0.00    | 0.00    | 0.00    |
| GH86       | 0.00     | 0.00     | 0.00     | 0.00     | 0.00     | 0.00     | 0.00     | 0.00     | 0.00    | 0.00    | 0.00    | 0.00    | 0.00    | 0.00    | 0.00    | 0.00    |
| GH123      | 0.00     | 0.00     | 0.00     | 0.06     | 0.18     | 0.01     | 0.02     | 0.00     | 0.00    | 0.00    | 0.00    | 0.00    | 0.00    | 0.00    | 0.00    | 0.00    |
| GH96       | 0.00     | 0.00     | 0.00     | 0.00     | 0.00     | 0.00     | 0.00     | 0.00     | 0.00    | 0.00    | 0.00    | 0.00    | 0.00    | 0.00    | 0.00    | 0.00    |
| GH14       | 0.00     | 0.00     | 0.00     | 0.00     | 0.00     | 0.00     | 0.00     | 0.00     | 0.00    | 0.00    | 0.00    | 0.00    | 0.00    | 0.00    | 0.00    | 0.00    |
| CE3        | 0.00     | 0.00     | 0.00     | 0.00     | 0.00     | 0.00     | 0.00     | 0.00     | 0.00    | 0.00    | 0.00    | 0.00    | 0.00    | 0.00    | 0.00    | 0.00    |
| PL10       | 0.00     | 0.00     | 0.12     | 0.00     | 0.13     | 0.40     | 0.29     | 0.16     | 0.22    | 0.13    | 0.15    | 0.00    | 0.00    | 0.10    | 0.00    | 0.00    |
| GT48       | 0.00     | 0.00     | 0.00     | 0.00     | 0.00     | 0.00     | 0.00     | 0.00     | 0.00    | 0.00    | 0.00    | 0.00    | 0.00    | 0.00    | 0.00    | 0.00    |
| PL6        | 0.00     | 0.00     | 0.00     | 0.00     | 0.00     | 0.00     | 0.00     | 0.00     | 0.00    | 0.00    | 0.00    | 0.00    | 0.00    | 0.00    | 0.00    | 0.00    |
| GT83       | 0.03     | 0.00     | 0.38     | 0.07     | 0.84     | 0.74     | 0.40     | 0.35     | 0.36    | 0.32    | 0.49    | 0.20    | 0.15    | 0.18    | 0.09    | 0.03    |
| GH126      | 0.00     | 0.00     | 0.00     | 0.00     | 0.00     | 0.00     | 0.00     | 0.00     | 0.00    | 0.00    | 0.00    | 0.00    | 0.00    | 0.00    | 0.00    | 0.00    |
| GH9        | 0.00     | 0.00     | 0.00     | 0.00     | 0.10     | 0.07     | 0.05     | 0.04     | 0.02    | 0.00    | 0.03    | 0.02    | 0.00    | 0.02    | 0.00    | 0.00    |
| GH75       | 0.00     | 0.00     | 0.00     | 0.00     | 0.00     | 0.00     | 0.00     | 0.00     | 0.00    | 0.00    | 0.00    | 0.00    | 0.00    | 0.00    | 0.00    | 0.00    |
| GT71       | 0.00     | 0.00     | 0.00     | 0.00     | 0.00     | 0.00     | 0.00     | 0.00     | 0.00    | 0.00    | 0.00    | 0.00    | 0.00    | 0.00    | 0.00    | 0.00    |
| GH46       | 0.00     | 0.00     | 0.00     | 0.00     | 0.00     | 0.00     | 0.00     | 0.00     | 0.00    | 0.00    | 0.00    | 0.00    | 0.00    | 0.00    | 0.00    | 0.00    |
| GT61       | 0.00     | 0.00     | 0.00     | 0.00     | 0.00     | 0.00     | 0.00     | 0.00     | 0.00    | 0.00    | 0.00    | 0.00    | 0.00    | 0.00    | 0.00    | 0.00    |
| GT3        | 0.02     | 0.00     | 0.27     | 0.00     | 0.30     | 0.26     | 0.31     | 0.21     | 0.22    | 0.26    | 0.22    | 0.00    | 0.00    | 0.07    | 0.02    | 0.00    |
| PL3        | 0.00     | 0.00     | 0.00     | 0.00     | 0.00     | 0.00     | 0.00     | 0.00     | 0.00    | 0.00    | 0.00    | 0.00    | 0.00    | 0.00    | 0.00    | 0.00    |
| GH108      | 0.00     | 0.00     | 0.12     | 0.02     | 0.03     | 0.03     | 0.00     | 0.00     | 0.02    | 0.00    | 0.00    | 0.00    | 0.00    | 0.00    | 0.00    | 0.00    |
| GT56       | 0.02     | 0.00     | 0.00     | 0.01     | 0.01     | 0.03     | 0.00     | 0.00     | 0.00    | 0.00    | 0.00    | 0.20    | 0.02    | 0.03    | 0.00    | 0.03    |
| PL11       | 0.00     | 0.00     | 0.17     | 0.01     | 0.37     | 0.23     | 0.07     | 0.06     | 0.23    | 0.24    | 0.32    | 0.00    | 0.00    | 0.03    | 0.00    | 0.00    |
| GH45       | 0.00     | 0.00     | 0.00     | 0.00     | 0.00     | 0.00     | 0.00     | 0.00     | 0.00    | 0.00    | 0.00    | 0.00    | 0.00    | 0.00    | 0.00    | 0.00    |
| GT34       | 0.02     | 0.05     | 0.05     | 0.03     | 0.01     | 0.00     | 0.01     | 0.01     | 0.07    | 0.03    | 0.10    | 0.00    | 0.02    | 0.00    | 0.00    | 0.00    |
| PL14       | 0.00     | 0.00     | 0.00     | 0.00     | 0.00     | 0.00     | 0.00     | 0.00     | 0.00    | 0.00    | 0.00    | 0.00    | 0.00    | 0.00    | 0.00    | 0.00    |
| GH19       | 0.00     | 0.00     | 0.00     | 0.01     | 0.00     | 0.03     | 0.02     | 0.01     | 0.03    | 0.08    | 0.12    | 0.02    | 0.02    | 0.02    | 0.00    | 0.05    |
| GH118      | 0.00     | 0.00     | 0.00     | 0.00     | 0.00     | 0.00     | 0.00     | 0.00     | 0.00    | 0.00    | 0.00    | 0.00    | 0.00    | 0.00    | 0.00    | 0.00    |
| GH82       | 0.00     | 0.00     | 0.00     | 0.00     | 0.00     | 0.00     | 0.00     | 0.00     | 0.00    | 0.00    | 0.00    | 0.00    | 0.00    | 0.00    | 0.00    | 0.00    |
| GH76       | 0.00     | 0.00     | 0.00     | 0.00     | 0.49     | 0.04     | 0.02     | 0.02     | 0.00    | 0.00    | 0.00    | 0.00    | 0.00    | 0.00    | 0.00    | 0.00    |
| GT4        | 8.14     | 9.32     | 6.36     | 6.87     | 6.94     | 5.36     | 5.90     | 5.84     | 6.11    | 7.14    | 5.37    | 7.21    | 5.93    | 7.24    | 9.71    | 6.50    |
| GT87       | 0.05     | 0.03     | 0.03     | 0.04     | 0.00     | 0.00     | 0.04     | 0.02     | 0.03    | 0.03    | 0.00    | 0.00    | 0.00    | 0.02    | 0.00    | 0.00    |
| GH24       | 0.05     | 0.00     | 0.36     | 0.03     | 0.16     | 0.19     | 0.25     | 0.29     | 0.17    | 0.26    | 0.15    | 0.17    | 0.05    | 0.13    | 0.09    | 0.16    |
| GH90       | 0.00     | 0.00     | 0.00     | 0.00     | 0.00     | 0.00     | 0.00     | 0.00     | 0.00    | 0.00    | 0.00    | 0.00    | 0.00    | 0.00    | 0.00    | 0.00    |
| GH57       | 0.00     | 0.00     | 0.29     | 0.02     | 0.35     | 0.30     | 0.37     | 0.24     | 0.14    | 0.16    | 0.41    | 0.00    | 0.00    | 0.07    | 0.00    | 0.00    |
| GH36       | 1.84     | 2.59     | 4.02     | 5.50     | 2.64     | 2.76     | 4.14     | 2.98     | 3.49    | 4.15    | 2.87    | 4.07    | 3.00    | 2.48    | 2.40    | 2.52    |
| GT46       | 0.00     | 0.00     | 0.00     | 0.00     | 0.00     | 0.00     | 0.00     | 0.00     | 0.00    | 0.00    | 0.00    | 0.00    | 0.00    | 0.00    | 0.00    | 0.00    |
| GH66       | 0.08     | 0.08     | 0.11     | 0.18     | 0.07     | 0.12     | 0.25     | 0.21     | 0.12    | 0.21    | 0.12    | 0.39    | 0.22    | 0.10    | 1.03    | 0.08    |

Normalized\_abundance\_2

| CAZY_group | MA-IN-11 | MA-IN-12 | MA-IN-13 | MA-IN-14 | MA-IN-15 | MA-IN-16 | MA-IN-17 | MA-IN-18 | MA-IN-2 | MA-IN-3 | MA-IN-4 | MA-IN-5 | MA-IN-6 | MA-IN-7 | MA-IN-8 | MA-IN-9 |
|------------|----------|----------|----------|----------|----------|----------|----------|----------|---------|---------|---------|---------|---------|---------|---------|---------|
| GH48       | 0.00     | 0.00     | 0.00     | 0.00     | 0.00     | 0.00     | 0.00     | 0.00     | 0.00    | 0.00    | 0.00    | 0.00    | 0.00    | 0.00    | 0.00    | 0.00    |
| GT53       | 0.00     | 0.00     | 0.00     | 0.00     | 0.00     | 0.00     | 0.00     | 0.00     | 0.00    | 0.00    | 0.00    | 0.00    | 0.00    | 0.00    | 0.00    | 0.00    |
| GH60       | 0.00     | 0.00     | 0.00     | 0.00     | 0.00     | 0.00     | 0.00     | 0.00     | 0.00    | 0.00    | 0.00    | 0.00    | 0.00    | 0.00    | 0.00    | 0.00    |
| GT31       | 0.00     | 0.00     | 0.00     | 0.00     | 0.00     | 0.00     | 0.01     | 0.00     | 0.00    | 0.00    | 0.00    | 0.00    | 0.00    | 0.00    | 0.00    | 0.00    |
| GH105      | 0.00     | 0.00     | 0.93     | 0.02     | 0.91     | 0.79     | 0.37     | 0.21     | 0.70    | 0.48    | 0.56    | 0.00    | 0.00    | 0.31    | 0.00    | 0.05    |
| GT23       | 0.00     | 0.00     | 0.00     | 0.00     | 0.01     | 0.00     | 0.00     | 0.00     | 0.00    | 0.00    | 0.00    | 0.02    | 0.00    | 0.00    | 0.00    | 0.00    |
| GH11       | 0.00     | 0.00     | 0.00     | 0.00     | 0.00     | 0.00     | 0.00     | 0.01     | 0.01    | 0.00    | 0.00    | 0.00    | 0.00    | 0.00    | 0.00    | 0.00    |
| GT38       | 0.00     | 0.00     | 0.00     | 0.00     | 0.00     | 0.00     | 0.00     | 0.00     | 0.00    | 0.00    | 0.00    | 0.00    | 0.00    | 0.00    | 0.00    | 0.00    |
| GT43       | 0.00     | 0.00     | 0.00     | 0.00     | 0.00     | 0.00     | 0.00     | 0.00     | 0.00    | 0.00    | 0.00    | 0.00    | 0.00    | 0.00    | 0.00    | 0.00    |
| GH99       | 0.00     | 0.00     | 0.02     | 0.00     | 0.00     | 0.00     | 0.00     | 0.00     | 0.00    | 0.00    | 0.00    | 0.00    | 0.00    | 0.00    | 0.00    | 0.00    |
| GH38       | 7.33     | 7.61     | 1.53     | 2.57     | 2.03     | 1.53     | 1.67     | 2.17     | 2.11    | 1.40    | 0.39    | 3.59    | 4.74    | 3.85    | 3.46    | 6.31    |
| GH109      | 0.02     | 0.00     | 0.38     | 0.01     | 0.61     | 0.41     | 0.07     | 0.04     | 0.14    | 0.05    | 0.20    | 0.00    | 0.00    | 0.08    | 0.00    | 0.03    |
| GH2        | 6.03     | 5.79     | 8.30     | 6.54     | 10.83    | 8.04     | 8.13     | 7.68     | 7.26    | 9.62    | 8.66    | 3.78    | 4.71    | 6.72    | 4.61    | 5.25    |
| GT28       | 1.24     | 1.37     | 1.17     | 1.42     | 1.06     | 1.11     | 1.27     | 1.34     | 1.12    | 1.30    | 1.12    | 1.49    | 1.31    | 1.32    | 1.32    | 1.01    |
| GH42       | 5.16     | 4.61     | 2.81     | 4.59     | 2.18     | 1.49     | 2.55     | 2.66     | 2.85    | 2.33    | 1.41    | 2.97    | 4.51    | 4.32    | 5.53    | 3.90    |
| GT58       | 0.00     | 0.00     | 0.00     | 0.00     | 0.00     | 0.00     | 0.00     | 0.00     | 0.00    | 0.00    | 0.00    | 0.00    | 0.00    | 0.00    | 0.00    | 0.00    |
| GH61       | 0.00     | 0.00     | 0.00     | 0.00     | 0.00     | 0.00     | 0.00     | 0.00     | 0.00    | 0.00    | 0.00    | 0.00    | 0.00    | 0.00    | 0.00    | 0.00    |
| GH80       | 0.00     | 0.00     | 0.00     | 0.00     | 0.00     | 0.00     | 0.00     | 0.00     | 0.00    | 0.00    | 0.00    | 0.00    | 0.00    | 0.00    | 0.00    | 0.00    |
| GH98       | 0.00     | 0.00     | 0.03     | 0.00     | 0.02     | 0.03     | 0.06     | 0.02     | 0.02    | 0.03    | 0.07    | 0.07    | 0.00    | 0.00    | 0.00    | 0.00    |
| GH6        | 0.00     | 0.00     | 0.00     | 0.00     | 0.00     | 0.00     | 0.00     | 0.00     | 0.00    | 0.00    | 0.00    | 0.02    | 0.00    | 0.00    | 0.00    | 0.00    |
| GT1        | 0.00     | 0.00     | 0.08     | 0.05     | 0.07     | 0.04     | 0.13     | 0.10     | 0.06    | 0.00    | 0.09    | 0.11    | 0.05    | 0.02    | 0.02    | 0.00    |
| GH28       | 0.61     | 0.64     | 1.43     | 0.42     | 1.47     | 1.65     | 2.14     | 1.24     | 1.52    | 1.43    | 2.19    | 0.29    | 0.45    | 0.86    | 0.47    | 0.34    |
| GT42       | 0.00     | 0.00     | 0.00     | 0.00     | 0.00     | 0.00     | 0.00     | 0.00     | 0.00    | 0.00    | 0.00    | 0.00    | 0.00    | 0.00    | 0.00    | 0.00    |
| GH128      | 0.00     | 0.00     | 0.00     | 0.00     | 0.00     | 0.00     | 0.00     | 0.00     | 0.00    | 0.00    | 0.00    | 0.00    | 0.00    | 0.00    | 0.00    | 0.00    |
| CE12       | 0.00     | 0.00     | 0.26     | 0.01     | 0.12     | 0.36     | 0.21     | 0.14     | 0.30    | 0.32    | 0.60    | 0.00    | 0.00    | 0.08    | 0.00    | 0.00    |
| CE16       | 0.00     | 0.00     | 0.00     | 0.00     | 0.00     | 0.00     | 0.00     | 0.00     | 0.00    | 0.00    | 0.00    | 0.00    | 0.00    | 0.00    | 0.00    | 0.00    |
| GT89       | 0.00     | 0.00     | 0.00     | 0.00     | 0.00     | 0.00     | 0.00     | 0.00     | 0.00    | 0.00    | 0.00    | 0.00    | 0.00    | 0.00    | 0.00    | 0.00    |
| GT11       | 0.00     | 0.00     | 0.05     | 0.01     | 0.14     | 0.03     | 0.02     | 0.04     | 0.03    | 0.16    | 0.12    | 0.00    | 0.00    | 0.00    | 0.00    | 0.00    |
| GT77       | 0.22     | 0.00     | 0.00     | 0.06     | 0.10     | 0.10     | 0.00     | 0.00     | 0.00    | 0.00    | 0.00    | 0.94    | 0.42    | 0.05    | 0.16    | 0.40    |
| GT55       | 0.00     | 0.00     | 0.00     | 0.00     | 0.00     | 0.00     | 0.00     | 0.00     | 0.00    | 0.00    | 0.00    | 0.00    | 0.00    | 0.00    | 0.00    | 0.00    |
| GT18       | 0.00     | 0.00     | 0.00     | 0.00     | 0.00     | 0.00     | 0.00     | 0.00     | 0.00    | 0.00    | 0.00    | 0.00    | 0.00    | 0.00    | 0.00    | 0.00    |
| GH87       | 0.08     | 0.04     | 0.00     | 0.11     | 0.00     | 0.00     | 0.04     | 0.01     | 0.00    | 0.11    | 0.07    | 0.37    | 0.02    | 0.03    | 0.75    | 0.00    |
| PL5        | 0.00     | 0.00     | 0.00     | 0.00     | 0.00     | 0.00     | 0.00     | 0.00     | 0.00    | 0.00    | 0.00    | 0.00    | 0.00    | 0.00    | 0.00    | 0.00    |
| GH22       | 0.00     | 0.00     | 0.00     | 0.00     | 0.00     | 0.00     | 0.00     | 0.00     | 0.00    | 0.00    | 0.00    | 0.00    | 0.00    | 0.00    | 0.00    | 0.00    |
| CE2        | 0.00     | 0.00     | 0.12     | 0.34     | 0.06     | 0.14     | 0.30     | 0.18     | 0.08    | 0.24    | 0.19    | 0.11    | 0.00    | 0.03    | 0.00    | 0.00    |
| GH120      | 0.00     | 0.00     | 0.57     | 0.92     | 0.10     | 0.04     | 0.10     | 0.09     | 0.51    | 0.00    | 0.14    | 0.00    | 0.00    | 0.00    | 0.00    | 0.00    |
| GH73       | 0.53     | 0.53     | 1.02     | 1.39     | 0.89     | 1.07     | 1.38     | 0.85     | 0.73    | 0.69    | 0.48    | 0.97    | 0.89    | 0.90    | 1.55    | 0.66    |
| GT17       | 0.00     | 0.00     | 0.00     | 0.00     | 0.00     | 0.00     | 0.00     | 0.00     | 0.00    | 0.00    | 0.00    | 0.00    | 0.00    | 0.00    | 0.00    | 0.00    |
| GH124      | 0.00     | 0.00     | 0.00     | 0.00     | 0.00     | 0.00     | 0.00     | 0.00     | 0.00    | 0.00    | 0.00    | 0.00    | 0.00    | 0.00    | 0.00    | 0.00    |
| GH54       | 0.00     | 0.00     | 0.00     | 0.00     | 0.00     | 0.00     | 0.00     | 0.00     | 0.00    | 0.00    | 0.00    | 0.00    | 0.00    | 0.00    | 0.00    | 0.00    |
| GH100      | 0.00     | 0.00     | 0.00     | 0.00     | 0.02     | 0.00     | 0.00     | 0.01     | 0.00    | 0.00    | 0.00    | 0.00    | 0.00    | 0.00    | 0.00    | 0.00    |
| GH113      | 0.00     | 0.00     | 0.00     | 0.00     | 0.02     | 0.00     | 0.01     | 0.00     | 0.00    | 0.00    | 0.00    | 0.00    | 0.00    | 0.00    | 0.00    | 0.00    |
| GT5        | 0.18     | 0.16     | 0.63     | 0.35     | 0.54     | 0.72     | 0.57     | 0.56     | 0.61    | 0.53    | 0.70    | 0.35    | 0.60    | 0.26    | 0.52    | 0.32    |
| GH94       | 0.00     | 0.00     | 0.59     | 0.07     | 0.30     | 0.77     | 0.70     | 0.39     | 0.66    | 0.93    | 0.99    | 0.40    | 0.55    | 0.15    | 0.00    | 0.00    |
| GT66       | 0.00     | 0.00     | 0.02     | 0.00     | 0.00     | 0.00     | 0.01     | 0.02     | 0.00    | 0.00    | 0.07    | 0.00    | 0.00    | 0.00    | 0.00    | 0.00    |
| GT94       | 0.00     | 0.00     | 0.00     | 0.00     | 0.00     | 0.00     | 0.00     | 0.00     | 0.00    | 0.00    | 0.00    | 0.00    | 0.00    | 0.00    | 0.00    | 0.00    |
| GH58       | 0.00     | 0.00     | 0.00     | 0.00     | 0.00     | 0.00     | 0.00     | 0.00     | 0.00    | 0.00    | 0.00    | 0.00    | 0.00    | 0.00    | 0.00    | 0.00    |
| GH1        | 1.46     | 1.23     | 1.38     | 3.42     | 1.18     | 0.86     | 2.19     | 1.33     | 1.33    | 2.17    | 1.56    | 4.88    | 2.68    | 0.85    | 1.36    | 0.64    |
| PL22       | 0.00     | 0.00     | 0.00     | 0.00     | 0.00     | 0.00     | 0.00     | 0.00     | 0.00    | 0.00    | 0.00    | 0.00    | 0.00    | 0.00    | 0.00    | 0.00    |
| GT9        | 0.05     | 0.00     | 0.57     | 0.19     | 0.51     | 0.55     | 0.61     | 0.63     | 0.41    | 0.56    | 0.83    | 0.35    | 0.35    | 0.46    | 0.19    | 0.03    |



Normalized\_abundance\_2

| CAZY_group | MA-IN-11 | MA-IN-12 | MA-IN-13 | MA-IN-14 | MA-IN-15 | MA-IN-16 | MA-IN-17 | MA-IN-18 | MA-IN-2 | MA-IN-3 | MA-IN-4 | MA-IN-5 | MA-IN-6 | MA-IN-7 | MA-IN-8 | MA-IN-9 |
|------------|----------|----------|----------|----------|----------|----------|----------|----------|---------|---------|---------|---------|---------|---------|---------|---------|
| GT76       | 0.00     | 0.00     | 0.00     | 0.00     | 0.00     | 0.00     | 0.00     | 0.00     | 0.00    | 0.00    | 0.00    | 0.00    | 0.00    | 0.00    | 0.00    | 0.00    |
| GT32       | 0.68     | 0.80     | 0.12     | 0.06     | 0.27     | 0.29     | 0.45     | 0.17     | 0.21    | 0.71    | 0.10    | 0.06    | 0.02    | 0.15    | 0.31    | 0.13    |
| GT47       | 0.41     | 0.43     | 0.21     | 0.67     | 0.36     | 0.33     | 0.39     | 0.39     | 0.39    | 0.53    | 0.37    | 0.50    | 0.67    | 0.57    | 0.49    | 0.29    |
| GH84       | 0.00     | 0.00     | 0.41     | 0.04     | 0.84     | 0.48     | 0.25     | 1.16     | 0.75    | 0.40    | 0.54    | 0.02    | 0.02    | 0.59    | 0.07    | 0.77    |
| GH83       | 0.00     | 0.00     | 0.00     | 0.00     | 0.00     | 0.00     | 0.00     | 0.00     | 0.00    | 0.00    | 0.00    | 0.00    | 0.00    | 0.00    | 0.00    | 0.00    |
| GT59       | 0.00     | 0.00     | 0.00     | 0.00     | 0.00     | 0.00     | 0.00     | 0.00     | 0.00    | 0.00    | 0.00    | 0.00    | 0.00    | 0.00    | 0.00    | 0.00    |
| GH34       | 0.00     | 0.00     | 0.00     | 0.00     | 0.00     | 0.00     | 0.00     | 0.00     | 0.00    | 0.00    | 0.00    | 0.00    | 0.00    | 0.00    | 0.00    | 0.00    |
| GT14       | 0.00     | 0.00     | 0.05     | 0.11     | 0.12     | 0.18     | 0.53     | 0.23     | 0.07    | 0.32    | 0.10    | 0.02    | 0.25    | 0.28    | 0.64    | 0.00    |
| GH47       | 0.05     | 0.05     | 0.03     | 0.00     | 0.02     | 0.03     | 0.02     | 0.03     | 0.03    | 0.03    | 0.00    | 0.05    | 0.00    | 0.00    | 0.02    | 0.00    |
| GH97       | 0.00     | 0.00     | 2.14     | 0.05     | 1.92     | 2.95     | 3.09     | 1.65     | 1.60    | 1.43    | 2.31    | 0.04    | 0.02    | 0.36    | 0.00    | 0.08    |
| GH50       | 0.00     | 0.00     | 0.00     | 0.00     | 0.23     | 0.03     | 0.00     | 0.00     | 0.00    | 0.00    | 0.00    | 0.00    | 0.00    | 0.00    | 0.00    | 0.00    |
| GT26       | 0.36     | 0.31     | 0.65     | 0.67     | 0.60     | 0.97     | 0.49     | 0.32     | 0.37    | 0.63    | 0.44    | 0.42    | 0.84    | 0.28    | 0.40    | 0.34    |
| GH18       | 1.62     | 1.91     | 0.77     | 1.69     | 1.80     | 1.12     | 0.69     | 0.88     | 0.82    | 0.85    | 0.58    | 1.14    | 1.41    | 1.84    | 2.38    | 1.11    |
| GH37       | 0.03     | 0.00     | 0.02     | 0.04     | 0.05     | 0.03     | 0.01     | 0.01     | 0.03    | 0.00    | 0.03    | 0.31    | 0.07    | 0.28    | 0.05    | 0.13    |
| PL13       | 0.00     | 0.00     | 0.00     | 0.00     | 0.02     | 0.00     | 0.00     | 0.00     | 0.00    | 0.00    | 0.00    | 0.00    | 0.00    | 0.00    | 0.00    | 0.00    |
| GH27       | 0.00     | 0.00     | 0.39     | 0.03     | 0.49     | 0.34     | 0.12     | 0.08     | 0.37    | 0.21    | 0.32    | 0.00    | 0.00    | 0.07    | 0.02    | 0.00    |
| GT54       | 0.00     | 0.00     | 0.00     | 0.00     | 0.00     | 0.00     | 0.00     | 0.00     | 0.00    | 0.00    | 0.00    | 0.00    | 0.00    | 0.00    | 0.00    | 0.00    |
| GT91       | 0.00     | 0.00     | 0.00     | 0.00     | 0.00     | 0.00     | 0.00     | 0.00     | 0.00    | 0.00    | 0.00    | 0.00    | 0.00    | 0.00    | 0.00    | 0.00    |
| GT72       | 0.00     | 0.00     | 0.00     | 0.00     | 0.00     | 0.00     | 0.00     | 0.00     | 0.00    | 0.00    | 0.00    | 0.00    | 0.00    | 0.00    | 0.00    | 0.00    |
| GH67       | 0.00     | 0.00     | 0.42     | 0.01     | 0.23     | 0.45     | 0.36     | 0.18     | 0.29    | 0.40    | 0.37    | 0.00    | 0.00    | 0.10    | 0.00    | 0.00    |
| GH12       | 0.00     | 0.00     | 0.06     | 0.00     | 0.02     | 0.05     | 0.01     | 0.01     | 0.00    | 0.03    | 0.03    | 0.00    | 0.00    | 0.00    | 0.00    | 0.00    |
| GH91       | 0.00     | 0.00     | 0.00     | 0.00     | 0.06     | 0.00     | 0.01     | 0.01     | 0.00    | 0.00    | 0.02    | 0.00    | 0.00    | 0.00    | 0.00    | 0.00    |
| GT69       | 0.00     | 0.00     | 0.00     | 0.00     | 0.00     | 0.00     | 0.00     | 0.00     | 0.00    | 0.00    | 0.00    | 0.00    | 0.00    | 0.00    | 0.00    | 0.00    |
| GH106      | 0.00     | 0.00     | 0.18     | 0.01     | 0.35     | 0.45     | 0.20     | 0.07     | 0.27    | 0.21    | 0.63    | 0.02    | 0.00    | 0.18    | 0.00    | 0.05    |
| GT62       | 0.00     | 0.00     | 0.00     | 0.00     | 0.00     | 0.00     | 0.00     | 0.00     | 0.00    | 0.00    | 0.00    | 0.00    | 0.00    | 0.00    | 0.00    | 0.00    |
| GH17       | 0.00     | 0.00     | 0.00     | 0.00     | 0.00     | 0.00     | 0.00     | 0.00     | 0.00    | 0.00    | 0.00    | 0.00    | 0.00    | 0.00    | 0.00    | 0.00    |
| GH88       | 0.00     | 0.00     | 0.26     | 0.00     | 0.63     | 0.55     | 0.04     | 0.07     | 0.17    | 0.11    | 0.17    | 0.02    | 0.00    | 0.07    | 0.00    | 0.00    |
| CE5        | 0.00     | 0.00     | 0.00     | 0.00     | 0.00     | 0.00     | 0.00     | 0.00     | 0.00    | 0.00    | 0.00    | 0.00    | 0.00    | 0.00    | 0.00    | 0.00    |
| GT8        | 0.05     | 0.16     | 0.27     | 0.66     | 0.72     | 0.30     | 0.53     | 0.37     | 0.24    | 0.79    | 1.04    | 1.32    | 1.04    | 0.55    | 2.05    | 0.42    |
| GT50       | 0.00     | 0.00     | 0.00     | 0.00     | 0.00     | 0.00     | 0.00     | 0.00     | 0.01    | 0.00    | 0.00    | 0.00    | 0.00    | 0.00    | 0.00    | 0.00    |
| GT20       | 0.00     | 0.00     | 0.02     | 0.00     | 0.16     | 0.03     | 0.02     | 0.00     | 0.01    | 0.00    | 0.02    | 0.07    | 0.07    | 0.03    | 0.00    | 0.00    |
| PL9        | 0.00     | 0.00     | 0.27     | 0.01     | 0.02     | 0.10     | 0.11     | 0.17     | 0.10    | 0.05    | 0.09    | 0.11    | 0.02    | 0.02    | 0.00    | 0.03    |
| GH55       | 0.00     | 0.00     | 0.00     | 0.01     | 0.02     | 0.00     | 0.00     | 0.00     | 0.00    | 0.00    | 0.00    | 0.00    | 0.02    | 0.00    | 0.00    | 0.00    |
| GH64       | 0.00     | 0.00     | 0.00     | 0.00     | 0.00     | 0.00     | 0.00     | 0.00     | 0.00    | 0.00    | 0.00    | 0.00    | 0.00    | 0.00    | 0.00    | 0.00    |
| GH127      | 0.00     | 0.00     | 0.86     | 0.10     | 0.95     | 1.26     | 1.22     | 0.60     | 1.28    | 0.63    | 1.04    | 0.20    | 0.05    | 0.18    | 0.02    | 0.11    |
| GH103      | 0.02     | 0.00     | 0.03     | 0.06     | 0.04     | 0.05     | 0.02     | 0.00     | 0.00    | 0.03    | 0.02    | 0.09    | 0.02    | 0.03    | 0.05    | 0.00    |
| GH3        | 4.60     | 3.88     | 10.38    | 10.35    | 7.30     | 5.91     | 9.44     | 7.26     | 7.92    | 9.68    | 7.81    | 4.64    | 6.15    | 3.95    | 1.36    | 2.47    |
| GT45       | 0.00     | 0.00     | 0.00     | 0.00     | 0.00     | 0.00     | 0.00     | 0.00     | 0.00    | 0.00    | 0.00    | 0.00    | 0.00    | 0.00    | 0.00    | 0.00    |
| GT74       | 0.00     | 0.00     | 0.00     | 0.00     | 0.00     | 0.00     | 0.00     | 0.00     | 0.00    | 0.00    | 0.00    | 0.00    | 0.00    | 0.00    | 0.00    | 0.00    |
| GT90       | 0.00     | 0.00     | 0.00     | 0.00     | 0.00     | 0.00     | 0.00     | 0.00     | 0.00    | 0.00    | 0.00    | 0.00    | 0.00    | 0.00    | 0.00    | 0.00    |
| GH116      | 0.00     | 0.00     | 0.00     | 0.00     | 0.01     | 0.00     | 0.00     | 0.00     | 0.01    | 0.00    | 0.02    | 0.00    | 0.00    | 0.00    | 0.00    | 0.00    |
| GH31       | 1.54     | 1.46     | 3.99     | 2.84     | 2.64     | 2.27     | 3.65     | 2.61     | 2.96    | 4.15    | 2.74    | 2.55    | 2.01    | 2.02    | 0.19    | 2.68    |
| GT12       | 0.00     | 0.00     | 0.00     | 0.00     | 0.00     | 0.00     | 0.00     | 0.00     | 0.00    | 0.00    | 0.00    | 0.00    | 0.00    | 0.00    | 0.00    | 0.00    |
| CE1        | 0.07     | 0.05     | 0.87     | 0.18     | 0.62     | 1.16     | 0.69     | 0.60     | 0.41    | 0.56    | 0.71    | 0.66    | 0.27    | 0.41    | 0.42    | 0.11    |
| GH121      | 0.00     | 0.00     | 0.33     | 0.09     | 0.12     | 0.04     | 0.33     | 0.31     | 0.71    | 0.00    | 0.00    | 0.00    | 0.00    | 0.00    | 0.00    | 0.00    |
| GH79       | 0.00     | 0.00     | 0.02     | 0.00     | 0.00     | 0.04     | 0.02     | 0.00     | 0.01    | 0.03    | 0.03    | 0.31    | 0.00    | 0.00    | 0.00    | 0.00    |
| GT73       | 0.00     | 0.00     | 0.00     | 0.01     | 0.00     | 0.03     | 0.00     | 0.01     | 0.00    | 0.00    | 0.00    | 0.00    | 0.00    | 0.00    | 0.00    | 0.00    |
| GH77       | 4.47     | 5.19     | 3.19     | 3.76     | 2.41     | 2.33     | 2.43     | 2.95     | 2.86    | 3.15    | 2.50    | 2.40    | 3.92    | 3.67    | 3.65    | 4.14    |
| PL17       | 0.00     | 0.00     | 0.00     | 0.00     | 0.00     | 0.00     | 0.00     | 0.00     | 0.00    | 0.00    | 0.00    | 0.00    | 0.00    | 0.00    | 0.00    | 0.00    |
| PL8        | 0.00     | 0.00     | 0.02     | 0.16     | 0.40     | 0.07     | 0.01     | 0.01     | 0.00    | 0.00    | 0.00    | 0.00    | 0.00    | 0.00    | 0.00    | 0.00    |

## Normalized\_abundance\_2

| CAZY_group | MA-IN-11 | MA-IN-12 | MA-IN-13 | MA-IN-14 | MA-IN-15 | MA-IN-16 | MA-IN-17 | MA-IN-18 | MA-IN-2 | MA-IN-3 | MA-IN-4 | MA-IN-5 | MA-IN-6 | MA-IN-7 | MA-IN-8 | MA-IN-9 |
|------------|----------|----------|----------|----------|----------|----------|----------|----------|---------|---------|---------|---------|---------|---------|---------|---------|
| CE9        | 0.99     | 1.48     | 0.68     | 1.56     | 1.07     | 0.70     | 0.95     | 1.14     | 1.22    | 0.53    | 0.80    | 1.10    | 1.36    | 0.96    | 1.36    | 0.96    |
| CE15       | 0.00     | 0.00     | 0.00     | 0.00     | 0.06     | 0.01     | 0.00     | 0.01     | 0.00    | 0.00    | 0.00    | 0.00    | 0.00    | 0.00    | 0.00    | 0.00    |
| GT79       | 0.00     | 0.00     | 0.00     | 0.00     | 0.00     | 0.00     | 0.00     | 0.00     | 0.00    | 0.00    | 0.00    | 0.00    | 0.00    | 0.00    | 0.00    | 0.00    |
| GT10       | 0.00     | 0.00     | 0.00     | 0.00     | 0.07     | 0.00     | 0.00     | 0.00     | 0.00    | 0.00    | 0.00    | 0.00    | 0.00    | 0.00    | 0.00    | 0.00    |
| GH119      | 0.00     | 0.00     | 0.00     | 0.00     | 0.00     | 0.00     | 0.00     | 0.00     | 0.00    | 0.00    | 0.00    | 0.00    | 0.00    | 0.00    | 0.00    | 0.00    |
| GH16       | 0.00     | 0.00     | 0.39     | 0.03     | 0.91     | 0.78     | 0.29     | 0.22     | 0.33    | 0.24    | 0.39    | 0.02    | 0.00    | 0.11    | 0.05    | 0.03    |
| GH43       | 1.59     | 1.93     | 10.38    | 10.12    | 5.74     | 6.89     | 9.55     | 6.92     | 9.08    | 8.43    | 9.68    | 2.31    | 2.73    | 3.07    | 0.92    | 0.74    |
| GH51       | 2.28     | 2.07     | 3.37     | 2.26     | 2.21     | 2.89     | 2.45     | 2.55     | 2.92    | 2.25    | 2.43    | 0.95    | 1.71    | 2.14    | 1.39    | 1.75    |
| GT35       | 3.05     | 2.92     | 2.26     | 3.31     | 2.32     | 1.98     | 2.14     | 2.26     | 2.51    | 2.72    | 2.14    | 2.90    | 3.13    | 2.79    | 3.72    | 2.95    |
| GT25       | 0.00     | 0.00     | 0.00     | 0.01     | 0.00     | 0.00     | 0.01     | 0.00     | 0.01    | 0.03    | 0.00    | 0.04    | 0.00    | 0.00    | 0.00    | 0.03    |
| GT2        | 17.73    | 18.50    | 16.17    | 17.72    | 16.10    | 15.03    | 14.67    | 16.00    | 14.84   | 15.78   | 13.08   | 14.05   | 16.89   | 18.82   | 18.89   | 18.39   |
| GT51       | 4.59     | 4.45     | 3.02     | 4.93     | 3.26     | 3.49     | 3.43     | 4.02     | 3.54    | 3.09    | 2.93    | 5.45    | 4.29    | 4.31    | 6.28    | 4.09    |
| GH107      | 0.00     | 0.00     | 0.00     | 0.00     | 0.00     | 0.00     | 0.00     | 0.00     | 0.00    | 0.00    | 0.00    | 0.00    | 0.00    | 0.00    | 0.00    | 0.00    |
| GH7        | 0.00     | 0.00     | 0.00     | 0.00     | 0.00     | 0.00     | 0.00     | 0.00     | 0.00    | 0.00    | 0.00    | 0.00    | 0.00    | 0.00    | 0.00    | 0.00    |
| GT7        | 0.00     | 0.00     | 0.00     | 0.00     | 0.00     | 0.00     | 0.00     | 0.00     | 0.00    | 0.00    | 0.00    | 0.00    | 0.00    | 0.00    | 0.00    | 0.00    |
| GT36       | 0.00     | 0.00     | 0.00     | 0.00     | 0.00     | 0.00     | 0.00     | 0.00     | 0.00    | 0.00    | 0.00    | 0.00    | 0.00    | 0.00    | 0.00    | 0.00    |
| PL7        | 0.00     | 0.01     | 0.00     | 0.01     | 0.00     | 0.00     | 0.00     | 0.01     | 0.00    | 0.00    | 0.02    | 0.04    | 0.07    | 0.00    | 0.12    | 0.00    |
| GH110      | 0.00     | 0.00     | 0.30     | 0.04     | 0.56     | 0.31     | 0.06     | 0.36     | 0.38    | 0.13    | 0.37    | 0.00    | 0.00    | 0.21    | 0.00    | 0.13    |
| GT21       | 0.00     | 0.00     | 0.00     | 0.00     | 0.00     | 0.00     | 0.00     | 0.00     | 0.00    | 0.00    | 0.00    | 0.00    | 0.00    | 0.00    | 0.00    | 0.00    |
| GH62       | 0.00     | 0.00     | 0.00     | 0.00     | 0.00     | 0.00     | 0.00     | 0.00     | 0.00    | 0.00    | 0.00    | 0.00    | 0.00    | 0.00    | 0.00    | 0.00    |
| GH125      | 1.18     | 1.36     | 0.44     | 0.33     | 0.81     | 0.62     | 0.44     | 0.76     | 0.46    | 0.29    | 0.20    | 0.84    | 0.72    | 0.93    | 0.73    | 0.96    |
| GH117      | 0.02     | 0.00     | 0.00     | 0.00     | 0.22     | 0.01     | 0.00     | 0.00     | 0.00    | 0.00    | 0.00    | 0.00    | 0.00    | 0.00    | 0.00    | 0.00    |
| GH68       | 0.10     | 0.01     | 0.00     | 0.06     | 0.00     | 0.00     | 0.02     | 0.01     | 0.02    | 0.03    | 0.00    | 0.20    | 0.35    | 0.07    | 0.75    | 0.03    |
| GH85       | 0.00     | 0.00     | 0.26     | 0.44     | 0.60     | 0.04     | 0.33     | 0.56     | 0.41    | 0.16    | 0.07    | 0.72    | 0.12    | 0.82    | 0.40    | 0.19    |
| GH92       | 0.53     | 0.43     | 1.28     | 0.28     | 4.14     | 1.93     | 0.66     | 0.59     | 0.68    | 1.11    | 0.66    | 0.44    | 0.47    | 0.46    | 0.05    | 0.16    |
| GH40       | 0.00     | 0.00     | 0.00     | 0.00     | 0.00     | 0.00     | 0.00     | 0.00     | 0.00    | 0.00    | 0.00    | 0.00    | 0.00    | 0.00    | 0.00    | 0.00    |
| GT49       | 0.00     | 0.00     | 0.00     | 0.00     | 0.00     | 0.00     | 0.00     | 0.00     | 0.00    | 0.00    | 0.00    | 0.00    | 0.00    | 0.00    | 0.00    | 0.00    |
| GH112      | 2.55     | 2.26     | 0.41     | 0.56     | 0.89     | 0.60     | 0.34     | 0.97     | 0.80    | 0.85    | 0.51    | 0.79    | 1.09    | 1.53    | 1.48    | 2.26    |
| GT67       | 0.00     | 0.00     | 0.00     | 0.00     | 0.00     | 0.00     | 0.00     | 0.00     | 0.00    | 0.00    | 0.00    | 0.00    | 0.00    | 0.00    | 0.00    | 0.00    |
| CE8        | 0.03     | 0.00     | 0.51     | 0.02     | 0.38     | 0.63     | 0.61     | 0.39     | 0.21    | 0.21    | 0.46    | 0.15    | 0.00    | 0.13    | 0.05    | 0.05    |
| GT86       | 0.00     | 0.00     | 0.00     | 0.00     | 0.00     | 0.00     | 0.00     | 0.00     | 0.00    | 0.00    | 0.00    | 0.00    | 0.00    | 0.00    | 0.00    | 0.00    |
| GH101      | 0.00     | 0.00     | 0.03     | 0.11     | 0.30     | 0.04     | 0.14     | 0.49     | 0.89    | 0.24    | 0.73    | 0.02    | 0.02    | 0.20    | 0.09    | 0.27    |
| GH81       | 0.00     | 0.00     | 0.00     | 0.00     | 0.00     | 0.00     | 0.00     | 0.00     | 0.00    | 0.00    | 0.00    | 0.00    | 0.00    | 0.00    | 0.00    | 0.00    |
| GT93       | 0.00     | 0.00     | 0.00     | 0.00     | 0.00     | 0.00     | 0.00     | 0.00     | 0.00    | 0.00    | 0.00    | 0.00    | 0.00    | 0.00    | 0.00    | 0.00    |
| GT63       | 0.00     | 0.00     | 0.00     | 0.00     | 0.00     | 0.00     | 0.00     | 0.00     | 0.00    | 0.00    | 0.00    | 0.00    | 0.00    | 0.00    | 0.00    | 0.00    |
| CE11       | 0.02     | 0.01     | 0.47     | 0.24     | 0.49     | 0.64     | 0.45     | 0.28     | 0.46    | 0.37    | 0.66    | 0.40    | 0.22    | 0.20    | 0.19    | 0.08    |
| GT19       | 0.00     | 0.00     | 0.41     | 0.06     | 0.49     | 0.49     | 0.37     | 0.25     | 0.31    | 0.21    | 0.58    | 0.18    | 0.12    | 0.16    | 0.02    | 0.03    |
| GT33       | 0.00     | 0.00     | 0.00     | 0.00     | 0.00     | 0.00     | 0.00     | 0.00     | 0.00    | 0.00    | 0.00    | 0.00    | 0.00    | 0.00    | 0.00    | 0.00    |
| GH21       | 0.00     | 0.00     | 0.00     | 0.00     | 0.00     | 0.00     | 0.00     | 0.00     | 0.00    | 0.00    | 0.00    | 0.00    | 0.00    | 0.00    | 0.00    | 0.00    |
| GT68       | 0.00     | 0.00     | 0.00     | 0.00     | 0.00     | 0.00     | 0.00     | 0.00     | 0.00    | 0.00    | 0.00    | 0.00    | 0.00    | 0.00    | 0.00    | 0.00    |
| GH89       | 0.00     | 0.00     | 0.24     | 0.01     | 0.97     | 0.62     | 0.22     | 0.54     | 0.41    | 0.61    | 0.51    | 0.00    | 0.00    | 0.29    | 0.02    | 0.27    |
| GT82       | 0.00     | 0.00     | 0.00     | 0.00     | 0.01     | 0.00     | 0.00     | 0.00     | 0.00    | 0.00    | 0.00    | 0.00    | 0.00    | 0.00    | 0.00    | 0.00    |
| GH30       | 0.00     | 0.00     | 1.08     | 0.88     | 0.73     | 0.60     | 0.79     | 0.52     | 1.19    | 0.48    | 0.75    | 0.28    | 0.30    | 0.21    | 0.00    | 0.13    |
| GH20       | 6.19     | 6.40     | 3.02     | 2.06     | 6.15     | 2.98     | 2.21     | 3.57     | 2.87    | 2.41    | 2.07    | 1.74    | 2.43    | 4.47    | 3.55    | 4.14    |
| GH52       | 0.00     | 0.00     | 0.00     | 0.00     | 0.00     | 0.00     | 0.00     | 0.00     | 0.00    | 0.00    | 0.00    | 0.00    | 0.00    | 0.00    | 0.00    | 0.00    |
| GT84       | 0.00     | 0.00     | 0.00     | 0.00     | 0.00     | 0.00     | 0.00     | 0.03     | 0.00    | 0.00    | 0.00    | 0.00    | 0.00    | 0.00    | 0.00    | 0.00    |
| GT15       | 0.00     | 0.00     | 0.00     | 0.00     | 0.00     | 0.00     | 0.00     | 0.00     | 0.00    | 0.00    | 0.00    | 0.00    | 0.00    | 0.00    | 0.00    | 0.00    |
| GH93       | 0.00     | 0.00     | 0.00     | 0.00     | 0.00     | 0.01     | 0.01     | 0.01     | 0.00    | 0.00    | 0.00    | 0.02    | 0.00    | 0.00    | 0.00    | 0.00    |
| PL16       | 0.00     | 0.00     | 0.00     | 0.01     | 0.00     | 0.00     | 0.00     | 0.00     | 0.00    | 0.00    | 0.00    | 0.00    | 0.00    | 0.00    | 0.00    | 0.00    |
| GH26       | 0.00     | 0.00     | 0.26     | 0.09     | 0.33     | 0.44     | 0.26     | 0.13     | 0.61    | 0.24    | 0.43    | 0.13    | 0.20    | 0.16    | 0.00    | 0.00    |

## Normalized\_abundance\_2

| CAZY_group | MA-IN-11 | MA-IN-12 | MA-IN-13 | MA-IN-14 | MA-IN-15 | MA-IN-16 | MA-IN-17 | MA-IN-18 | MA-IN-2 | MA-IN-3 | MA-IN-4 | MA-IN-5 | MA-IN-6 | MA-IN-7 | MA-IN-8 | MA-IN-9 |
|------------|----------|----------|----------|----------|----------|----------|----------|----------|---------|---------|---------|---------|---------|---------|---------|---------|
| GT75       | 0.00     | 0.00     | 0.00     | 0.00     | 0.00     | 0.00     | 0.00     | 0.00     | 0.00    | 0.00    | 0.00    | 0.00    | 0.00    | 0.00    | 0.00    | 0.00    |
| GH53       | 0.00     | 0.00     | 0.44     | 0.28     | 0.22     | 0.36     | 0.52     | 0.45     | 0.37    | 0.37    | 0.26    | 0.29    | 0.27    | 0.10    | 0.09    | 0.13    |
| GT88       | 0.00     | 0.00     | 0.00     | 0.00     | 0.00     | 0.00     | 0.00     | 0.00     | 0.00    | 0.00    | 0.00    | 0.00    | 0.00    | 0.00    | 0.00    | 0.00    |
| GT24       | 0.00     | 0.00     | 0.00     | 0.00     | 0.00     | 0.00     | 0.00     | 0.00     | 0.00    | 0.00    | 0.00    | 0.00    | 0.00    | 0.00    | 0.00    | 0.00    |
| GT81       | 0.00     | 0.00     | 0.00     | 0.00     | 0.00     | 0.00     | 0.00     | 0.00     | 0.00    | 0.00    | 0.00    | 0.00    | 0.00    | 0.00    | 0.00    | 0.00    |
| GH4        | 1.01     | 1.18     | 0.42     | 0.29     | 0.36     | 0.25     | 0.11     | 0.13     | 0.22    | 0.16    | 0.27    | 1.01    | 1.12    | 0.55    | 0.99    | 1.22    |
| GT78       | 0.00     | 0.00     | 0.00     | 0.00     | 0.00     | 0.00     | 0.00     | 0.00     | 0.00    | 0.00    | 0.00    | 0.00    | 0.00    | 0.00    | 0.00    | 0.00    |
| GH8        | 0.02     | 0.00     | 0.35     | 0.56     | 0.09     | 0.16     | 0.57     | 0.28     | 0.31    | 0.19    | 0.31    | 0.20    | 0.02    | 0.18    | 0.31    | 0.05    |
| GH70       | 0.25     | 0.34     | 0.08     | 0.58     | 0.03     | 0.01     | 0.20     | 0.17     | 0.07    | 0.13    | 0.15    | 1.78    | 1.41    | 0.65    | 5.81    | 0.29    |
| GH122      | 0.00     | 0.00     | 0.00     | 0.00     | 0.00     | 0.00     | 0.00     | 0.00     | 0.00    | 0.00    | 0.00    | 0.00    | 0.00    | 0.00    | 0.00    | 0.00    |
| GH74       | 0.00     | 0.00     | 0.00     | 0.00     | 0.01     | 0.00     | 0.00     | 0.00     | 0.00    | 0.00    | 0.00    | 0.00    | 0.00    | 0.00    | 0.00    | 0.00    |
| GT41       | 0.03     | 0.00     | 0.02     | 0.01     | 0.00     | 0.00     | 0.00     | 0.03     | 0.00    | 0.00    | 0.00    | 0.00    | 0.00    | 0.00    | 0.00    | 0.00    |
| PL1        | 0.00     | 0.00     | 0.36     | 0.05     | 0.41     | 0.12     | 0.29     | 0.22     | 0.15    | 0.21    | 0.61    | 0.04    | 0.10    | 0.21    | 0.05    | 0.00    |
| GH15       | 0.00     | 0.00     | 0.00     | 0.00     | 0.13     | 0.01     | 0.00     | 0.00     | 0.00    | 0.00    | 0.00    | 0.00    | 0.00    | 0.00    | 0.00    | 0.00    |
| GH32       | 1.66     | 1.87     | 2.20     | 2.34     | 1.44     | 1.78     | 1.65     | 1.39     | 1.60    | 1.82    | 1.77    | 2.64    | 3.05    | 1.57    | 2.38    | 2.63    |
| GH44       | 0.00     | 0.00     | 0.00     | 0.00     | 0.00     | 0.00     | 0.00     | 0.00     | 0.00    | 0.00    | 0.00    | 0.00    | 0.00    | 0.00    | 0.00    | 0.00    |
| GT6        | 0.00     | 0.00     | 0.00     | 0.00     | 0.01     | 0.01     | 0.00     | 0.00     | 0.00    | 0.00    | 0.00    | 0.00    | 0.00    | 0.00    | 0.00    | 0.00    |
| GH13       | 15.69    | 16.67    | 13.03    | 19.10    | 9.11     | 9.31     | 12.76    | 13.51    | 13.72   | 13.24   | 10.15   | 14.91   | 15.53   | 15.02   | 15.29   | 14.59   |
| GT80       | 0.00     | 0.00     | 0.00     | 0.03     | 0.01     | 0.01     | 0.02     | 0.02     | 0.00    | 0.00    | 0.03    | 0.09    | 0.02    | 0.03    | 0.00    | 0.00    |
| GH71       | 0.00     | 0.00     | 0.00     | 0.00     | 0.00     | 0.00     | 0.00     | 0.00     | 0.00    | 0.00    | 0.00    | 0.00    | 0.00    | 0.00    | 0.00    | 0.00    |
| GH63       | 0.00     | 0.00     | 0.02     | 0.02     | 0.16     | 0.15     | 0.29     | 0.13     | 0.09    | 0.05    | 0.20    | 0.17    | 0.02    | 0.21    | 0.09    | 0.05    |
| PL21       | 0.00     | 0.00     | 0.00     | 0.00     | 0.00     | 0.00     | 0.00     | 0.00     | 0.00    | 0.00    | 0.00    | 0.00    | 0.00    | 0.00    | 0.00    | 0.00    |
| GH65       | 0.00     | 0.00     | 0.11     | 0.80     | 0.41     | 0.21     | 0.49     | 0.10     | 0.17    | 0.16    | 0.05    | 0.13    | 0.77    | 0.18    | 0.21    | 0.03    |
| CE4        | 0.03     | 0.03     | 0.51     | 0.23     | 0.82     | 0.77     | 0.44     | 0.67     | 0.62    | 0.66    | 0.94    | 0.68    | 0.22    | 0.44    | 0.73    | 0.32    |
| CE14       | 0.00     | 0.00     | 0.00     | 0.00     | 0.05     | 0.00     | 0.00     | 0.02     | 0.01    | 0.00    | 0.00    | 0.15    | 0.00    | 0.00    | 0.00    | 0.05    |
| GH115      | 0.00     | 0.00     | 0.33     | 0.01     | 0.64     | 0.38     | 1.08     | 0.53     | 0.51    | 0.69    | 1.22    | 0.00    | 0.00    | 0.10    | 0.00    | 0.00    |
| GH104      | 0.00     | 0.00     | 0.00     | 0.00     | 0.00     | 0.01     | 0.00     | 0.00     | 0.00    | 0.00    | 0.02    | 0.09    | 0.00    | 0.00    | 0.00    | 0.00    |
| GH111      | 0.05     | 0.03     | 0.00     | 0.00     | 0.02     | 0.01     | 0.00     | 0.00     | 0.00    | 0.00    | 0.00    | 0.00    | 0.02    | 0.02    | 0.07    | 0.00    |
| GH95       | 2.32     | 2.45     | 2.66     | 2.42     | 2.48     | 2.58     | 2.35     | 2.30     | 2.72    | 3.01    | 2.64    | 1.36    | 1.54    | 2.46    | 1.46    | 2.02    |
| GT70       | 0.00     | 0.00     | 0.00     | 0.00     | 0.00     | 0.00     | 0.00     | 0.00     | 0.00    | 0.00    | 0.00    | 0.00    | 0.00    | 0.00    | 0.00    | 0.00    |
| CE10       | 0.08     | 0.35     | 0.57     | 0.21     | 0.42     | 0.30     | 0.34     | 0.22     | 0.27    | 0.32    | 0.29    | 0.26    | 0.40    | 0.16    | 0.16    | 0.21    |
| GH10       | 0.00     | 0.00     | 0.60     | 0.03     | 0.28     | 0.77     | 0.66     | 0.35     | 0.44    | 0.37    | 0.53    | 0.00    | 0.00    | 0.13    | 0.00    | 0.00    |
| GH130      | 0.00     | 0.00     | 0.21     | 0.00     | 0.68     | 0.31     | 0.29     | 0.19     | 0.20    | 0.26    | 0.36    | 0.00    | 0.00    | 0.02    | 0.00    | 0.00    |
| PL20       | 0.00     | 0.00     | 0.00     | 0.00     | 0.00     | 0.00     | 0.00     | 0.00     | 0.00    | 0.00    | 0.00    | 0.00    | 0.00    | 0.00    | 0.00    | 0.00    |
| GH69       | 0.00     | 0.00     | 0.00     | 0.00     | 0.00     | 0.00     | 0.00     | 0.00     | 0.00    | 0.00    | 0.00    | 0.00    | 0.00    | 0.00    | 0.00    | 0.00    |
| PL2        | 0.00     | 0.00     | 0.00     | 0.00     | 0.00     | 0.00     | 0.00     | 0.00     | 0.00    | 0.00    | 0.00    | 0.00    | 0.00    | 0.00    | 0.00    | 0.00    |
| GH49       | 0.00     | 0.00     | 0.00     | 0.00     | 0.00     | 0.01     | 0.00     | 0.00     | 0.00    | 0.00    | 0.00    | 0.00    | 0.00    | 0.00    | 0.00    | 0.00    |
| GH25       | 0.58     | 0.58     | 2.14     | 3.55     | 1.38     | 1.60     | 2.97     | 2.52     | 2.74    | 2.30    | 1.82    | 3.74    | 3.42    | 1.16    | 2.02    | 1.72    |
| GH59       | 0.00     | 0.00     | 0.00     | 0.01     | 0.00     | 0.00     | 0.00     | 0.00     | 0.00    | 0.05    | 0.05    | 0.00    | 0.00    | 0.08    | 0.00    | 0.00    |
| GH35       | 0.40     | 0.37     | 1.40     | 1.15     | 1.64     | 1.16     | 0.55     | 0.43     | 0.98    | 0.71    | 1.04    | 0.59    | 0.25    | 0.55    | 0.21    | 0.56    |
| GT39       | 0.00     | 0.00     | 0.00     | 0.00     | 0.00     | 0.00     | 0.00     | 0.00     | 0.00    | 0.00    | 0.00    | 0.28    | 0.32    | 0.00    | 0.00    | 0.00    |
| GT57       | 0.00     | 0.00     | 0.00     | 0.00     | 0.00     | 0.00     | 0.00     | 0.00     | 0.00    | 0.00    | 0.00    | 0.00    | 0.00    | 0.00    | 0.00    | 0.00    |
| GH129      | 1.59     | 1.41     | 0.20     | 0.27     | 0.70     | 0.34     | 0.29     | 0.82     | 0.47    | 0.16    | 0.26    | 0.39    | 0.67    | 1.35    | 0.78    | 1.35    |
| GT22       | 0.00     | 0.00     | 0.00     | 0.00     | 0.00     | 0.00     | 0.00     | 0.00     | 0.00    | 0.00    | 0.00    | 0.00    | 0.00    | 0.00    | 0.00    | 0.00    |
| PL12       | 0.00     | 0.00     | 0.00     | 0.00     | 0.15     | 0.00     | 0.02     | 0.00     | 0.01    | 0.00    | 0.00    | 0.00    | 0.00    | 0.00    | 0.00    | 0.03    |
| PL18       | 0.00     | 0.00     | 0.00     | 0.00     | 0.00     | 0.00     | 0.00     | 0.00     | 0.00    | 0.00    | 0.00    | 0.00    | 0.00    | 0.00    | 0.00    | 0.00    |
| GT92       | 0.00     | 0.00     | 0.00     | 0.00     | 0.00     | 0.00     | 0.00     | 0.00     | 0.00    | 0.00    | 0.00    | 0.00    | 0.00    | 0.00    | 0.00    | 0.00    |
| GT44       | 0.00     | 0.00     | 0.02     | 0.00     | 0.04     | 0.11     | 0.04     | 0.00     | 0.05    | 0.00    | 0.00    | 0.02    | 0.00    | 0.00    | 0.09    | 0.05    |
| GT29       | 0.00     | 0.00     | 0.00     | 0.01     | 0.00     | 0.00     | 0.00     | 0.00     | 0.00    | 0.00    | 0.00    | 0.00    | 0.00    | 0.00    | 0.00    | 0.00    |
| GT13       | 0.00     | 0.00     | 0.00     | 0.00     | 0.00     | 0.00     | 0.00     | 0.00     | 0.00    | 0.00    | 0.00    | 0.00    | 0.00    | 0.00    | 0.00    | 0.00    |

Normalized\_abundance\_2

| CAZY_group | MA-IN-11 | MA-IN-12 | MA-IN-13 | MA-IN-14 | MA-IN-15 | MA-IN-16 | MA-IN-17 | MA-IN-18 | MA-IN-2 | MA-IN-3 | MA-IN-4 | MA-IN-5 | MA-IN-6 | MA-IN-7 | MA-IN-8 | MA-IN-9 |
|------------|----------|----------|----------|----------|----------|----------|----------|----------|---------|---------|---------|---------|---------|---------|---------|---------|
| GT52       | 0.00     | 0.00     | 0.00     | 0.00     | 0.00     | 0.00     | 0.00     | 0.00     | 0.00    | 0.00    | 0.00    | 0.00    | 0.00    | 0.00    | 0.00    | 0.00    |
| GT64       | 0.00     | 0.00     | 0.00     | 0.00     | 0.00     | 0.00     | 0.00     | 0.00     | 0.00    | 0.01    | 0.00    | 0.00    | 0.00    | 0.00    | 0.00    | 0.00    |
| GT85       | 0.00     | 0.00     | 0.00     | 0.00     | 0.00     | 0.00     | 0.00     | 0.00     | 0.00    | 0.00    | 0.00    | 0.00    | 0.00    | 0.00    | 0.00    | 0.00    |
| GT16       | 0.00     | 0.00     | 0.00     | 0.00     | 0.00     | 0.00     | 0.00     | 0.00     | 0.00    | 0.00    | 0.00    | 0.00    | 0.00    | 0.00    | 0.00    | 0.00    |
| GH56       | 0.00     | 0.00     | 0.00     | 0.00     | 0.00     | 0.00     | 0.00     | 0.00     | 0.00    | 0.00    | 0.00    | 0.00    | 0.00    | 0.00    | 0.00    | 0.00    |
| GT60       | 0.00     | 0.00     | 0.00     | 0.00     | 0.00     | 0.00     | 0.00     | 0.00     | 0.00    | 0.00    | 0.00    | 0.00    | 0.00    | 0.00    | 0.00    | 0.00    |
| GH41       | 0.00     | 0.00     | 0.00     | 0.00     | 0.00     | 0.00     | 0.00     | 0.00     | 0.00    | 0.00    | 0.00    | 0.00    | 0.00    | 0.00    | 0.00    | 0.00    |
| CE7        | 0.00     | 0.00     | 0.41     | 0.01     | 0.37     | 0.25     | 0.15     | 0.07     | 0.33    | 0.50    | 0.39    | 0.28    | 0.07    | 0.03    | 0.00    | 0.00    |
| GH39       | 0.00     | 0.00     | 0.02     | 0.00     | 0.04     | 0.00     | 0.14     | 0.17     | 0.00    | 0.03    | 0.05    | 0.02    | 0.00    | 0.00    | 0.00    | 0.00    |
| GT30       | 0.10     | 0.14     | 0.92     | 0.50     | 0.74     | 1.04     | 0.80     | 0.57     | 0.56    | 0.79    | 0.80    | 0.39    | 0.37    | 0.83    | 0.38    | 0.82    |
| PL15       | 0.00     | 0.00     | 0.00     | 0.00     | 0.24     | 0.03     | 0.00     | 0.00     | 0.02    | 0.00    | 0.00    | 0.00    | 0.00    | 0.00    | 0.00    | 0.00    |
| GH102      | 0.00     | 0.00     | 0.00     | 0.03     | 0.05     | 0.04     | 0.04     | 0.01     | 0.06    | 0.03    | 0.00    | 0.28    | 0.00    | 0.07    | 0.05    | 0.03    |

Normalized\_abundance\_2

| CAZY_group | CN-AD-71 | CN-AD-72 | CN-AD-73 | CN-AD-74 | CN-AD-75 | CN-AD-76 | CN-AD-77 | CN-AD-78 | CN-AD-79 | CN-AD-80 | CN-AD-81 | CN-AD-82 | CN-AD-83 | CN-AD-84 | CN-AD-85 | CN-AD-86 |
|------------|----------|----------|----------|----------|----------|----------|----------|----------|----------|----------|----------|----------|----------|----------|----------|----------|
| GH29       | 0.89     | 0.67     | 0.29     | 0.93     | 0.58     | 0.47     | 0.93     | 1.07     | 0.58     | 0.35     | 0.37     | 0.92     | 0.50     | 0.52     | 0.50     | 0.77     |
| PL4        | 0.00     | 0.00     | 0.00     | 0.00     | 0.00     | 0.00     | 0.00     | 0.00     | 0.00     | 0.00     | 0.00     | 0.00     | 0.00     | 0.00     | 0.00     | 0.00     |
| GH23       | 1.22     | 1.01     | 0.65     | 0.96     | 0.83     | 0.91     | 1.10     | 0.97     | 0.78     | 0.71     | 0.72     | 0.99     | 0.91     | 1.09     | 0.98     | 1.13     |
| CE6        | 0.00     | 0.09     | 0.00     | 0.00     | 0.00     | 0.03     | 0.03     | 0.00     | 0.04     | 0.00     | 0.02     | 0.05     | 0.05     | 0.00     | 0.03     | 0.00     |
| GH72       | 0.07     | 0.04     | 0.10     | 0.12     | 0.13     | 0.02     | 0.12     | 0.08     | 0.06     | 0.03     | 0.09     | 0.02     | 0.03     | 0.05     | 0.08     | 0.15     |
| GH114      | 0.00     | 0.00     | 0.00     | 0.00     | 0.00     | 0.00     | 0.00     | 0.00     | 0.00     | 0.00     | 0.00     | 0.00     | 0.00     | 0.00     | 0.00     | 0.00     |
| GH78       | 1.24     | 1.08     | 0.40     | 0.32     | 0.43     | 0.87     | 1.24     | 1.07     | 0.35     | 0.24     | 0.48     | 1.27     | 0.93     | 0.34     | 0.35     | 1.02     |
| PL19       | 0.00     | 0.00     | 0.00     | 0.00     | 0.00     | 0.00     | 0.00     | 0.00     | 0.00     | 0.00     | 0.00     | 0.00     | 0.00     | 0.00     | 0.00     | 0.00     |
| GT27       | 0.00     | 0.00     | 0.00     | 0.00     | 0.00     | 0.00     | 0.00     | 0.00     | 0.00     | 0.00     | 0.00     | 0.00     | 0.00     | 0.00     | 0.00     | 0.00     |
| GH5        | 0.24     | 0.38     | 0.73     | 0.35     | 0.77     | 0.03     | 0.45     | 0.10     | 0.89     | 0.62     | 0.44     | 0.30     | 0.21     | 0.36     | 0.20     | 0.07     |
| GT40       | 0.00     | 0.00     | 0.00     | 0.00     | 0.00     | 0.00     | 0.00     | 0.00     | 0.00     | 0.00     | 0.00     | 0.00     | 0.00     | 0.00     | 0.00     | 0.00     |
| CE13       | 0.00     | 0.00     | 0.00     | 0.00     | 0.00     | 0.00     | 0.00     | 0.00     | 0.00     | 0.00     | 0.00     | 0.00     | 0.00     | 0.00     | 0.00     | 0.00     |
| GT37       | 0.00     | 0.00     | 0.00     | 0.00     | 0.00     | 0.00     | 0.00     | 0.00     | 0.00     | 0.00     | 0.00     | 0.00     | 0.00     | 0.00     | 0.00     | 0.00     |
| GH33       | 0.26     | 0.22     | 0.10     | 0.18     | 0.09     | 0.14     | 0.34     | 0.42     | 0.16     | 0.10     | 0.16     | 0.37     | 0.22     | 0.13     | 0.20     | 0.40     |
| GT65       | 0.00     | 0.00     | 0.00     | 0.00     | 0.00     | 0.00     | 0.00     | 0.00     | 0.00     | 0.00     | 0.00     | 0.00     | 0.00     | 0.00     | 0.00     | 0.00     |
| GH86       | 0.00     | 0.00     | 0.00     | 0.00     | 0.00     | 0.00     | 0.00     | 0.00     | 0.02     | 0.03     | 0.00     | 0.02     | 0.00     | 0.00     | 0.00     | 0.00     |
| GH123      | 0.11     | 0.13     | 0.05     | 0.09     | 0.06     | 0.14     | 0.14     | 0.21     | 0.06     | 0.04     | 0.10     | 0.27     | 0.12     | 0.05     | 0.05     | 0.15     |
| GH96       | 0.00     | 0.00     | 0.00     | 0.00     | 0.00     | 0.00     | 0.00     | 0.00     | 0.00     | 0.00     | 0.00     | 0.00     | 0.00     | 0.00     | 0.00     | 0.00     |
| GH14       | 0.00     | 0.00     | 0.00     | 0.00     | 0.00     | 0.00     | 0.00     | 0.00     | 0.00     | 0.00     | 0.00     | 0.00     | 0.00     | 0.00     | 0.00     | 0.00     |
| CE3        | 0.00     | 0.00     | 0.00     | 0.00     | 0.00     | 0.00     | 0.00     | 0.00     | 0.00     | 0.00     | 0.00     | 0.00     | 0.00     | 0.00     | 0.00     | 0.00     |
| PL10       | 0.22     | 0.13     | 0.10     | 0.32     | 0.10     | 0.09     | 0.19     | 0.13     | 0.14     | 0.03     | 0.05     | 0.15     | 0.15     | 0.10     | 0.08     | 0.07     |
| GT48       | 0.00     | 0.00     | 0.00     | 0.00     | 0.00     | 0.00     | 0.00     | 0.00     | 0.00     | 0.00     | 0.00     | 0.00     | 0.00     | 0.00     | 0.00     | 0.00     |
| PL6        | 0.00     | 0.00     | 0.00     | 0.00     | 0.00     | 0.00     | 0.02     | 0.00     | 0.00     | 0.00     | 0.00     | 0.00     | 0.00     | 0.00     | 0.00     | 0.00     |
| GT83       | 0.13     | 0.09     | 0.02     | 0.12     | 0.07     | 0.11     | 0.09     | 0.16     | 0.02     | 0.01     | 0.05     | 0.20     | 0.09     | 0.10     | 0.05     | 0.26     |
| GH126      | 0.00     | 0.00     | 0.00     | 0.00     | 0.00     | 0.00     | 0.00     | 0.00     | 0.00     | 0.00     | 0.00     | 0.00     | 0.00     | 0.00     | 0.00     | 0.00     |
| GH9        | 0.17     | 0.07     | 0.18     | 0.50     | 0.26     | 0.08     | 0.12     | 0.13     | 0.41     | 0.27     | 0.16     | 0.20     | 0.09     | 0.36     | 0.18     | 0.11     |
| GH75       | 0.00     | 0.00     | 0.00     | 0.00     | 0.00     | 0.00     | 0.00     | 0.00     | 0.00     | 0.00     | 0.00     | 0.00     | 0.00     | 0.00     | 0.00     | 0.00     |
| GT71       | 0.00     | 0.00     | 0.00     | 0.00     | 0.00     | 0.00     | 0.00     | 0.00     | 0.00     | 0.00     | 0.00     | 0.00     | 0.00     | 0.00     | 0.00     | 0.00     |
| GH46       | 0.00     | 0.00     | 0.00     | 0.00     | 0.00     | 0.00     | 0.00     | 0.00     | 0.00     | 0.00     | 0.00     | 0.00     | 0.00     | 0.00     | 0.00     | 0.00     |
| GT61       | 0.00     | 0.00     | 0.00     | 0.00     | 0.00     | 0.00     | 0.00     | 0.00     | 0.00     | 0.00     | 0.00     | 0.00     | 0.00     | 0.00     | 0.00     | 0.00     |
| GT3        | 0.22     | 0.07     | 0.03     | 0.09     | 0.08     | 0.11     | 0.16     | 0.08     | 0.02     | 0.03     | 0.06     | 0.12     | 0.09     | 0.03     | 0.03     | 0.18     |
| PL3        | 0.00     | 0.00     | 0.00     | 0.00     | 0.00     | 0.00     | 0.00     | 0.00     | 0.00     | 0.00     | 0.00     | 0.00     | 0.00     | 0.00     | 0.00     | 0.00     |
| GH108      | 0.04     | 0.09     | 0.03     | 0.00     | 0.03     | 0.05     | 0.03     | 0.05     | 0.02     | 0.03     | 0.02     | 0.02     | 0.03     | 0.08     | 0.05     | 0.00     |
| GT56       | 0.00     | 0.00     | 0.00     | 0.00     | 0.00     | 0.03     | 0.00     | 0.00     | 0.00     | 0.00     | 0.00     | 0.00     | 0.03     | 0.05     | 0.03     | 0.04     |
| PL11       | 0.26     | 0.31     | 0.16     | 0.12     | 0.14     | 0.16     | 0.20     | 0.18     | 0.06     | 0.11     | 0.09     | 0.17     | 0.10     | 0.10     | 0.13     | 0.04     |
| GH45       | 0.00     | 0.00     | 0.00     | 0.00     | 0.00     | 0.00     | 0.00     | 0.00     | 0.02     | 0.00     | 0.00     | 0.00     | 0.00     | 0.00     | 0.03     | 0.00     |
| GT34       | 0.00     | 0.00     | 0.00     | 0.00     | 0.01     | 0.00     | 0.00     | 0.00     | 0.00     | 0.00     | 0.00     | 0.00     | 0.00     | 0.00     | 0.00     | 0.00     |
| PL14       | 0.00     | 0.00     | 0.00     | 0.00     | 0.00     | 0.00     | 0.00     | 0.00     | 0.00     | 0.00     | 0.00     | 0.00     | 0.00     | 0.00     | 0.00     | 0.00     |
| GH19       | 0.00     | 0.00     | 0.00     | 0.00     | 0.01     | 0.00     | 0.00     | 0.03     | 0.02     | 0.00     | 0.00     | 0.00     | 0.00     | 0.00     | 0.00     | 0.00     |
| GH118      | 0.00     | 0.00     | 0.00     | 0.00     | 0.00     | 0.00     | 0.00     | 0.00     | 0.00     | 0.00     | 0.00     | 0.00     | 0.00     | 0.00     | 0.00     | 0.00     |
| GH82       | 0.00     | 0.00     | 0.00     | 0.00     | 0.00     | 0.00     | 0.00     | 0.00     | 0.00     | 0.00     | 0.00     | 0.00     | 0.00     | 0.00     | 0.00     | 0.00     |
| GH76       | 0.35     | 0.38     | 0.02     | 0.03     | 0.10     | 0.16     | 0.28     | 0.13     | 0.06     | 0.07     | 0.15     | 0.37     | 0.26     | 0.03     | 0.03     | 0.22     |
| GT4        | 1.92     | 2.15     | 1.53     | 2.34     | 1.59     | 1.19     | 2.24     | 2.17     | 1.61     | 1.07     | 1.39     | 2.71     | 1.38     | 1.43     | 1.75     | 2.75     |
| GT87       | 0.00     | 0.00     | 0.00     | 0.00     | 0.01     | 0.00     | 0.00     | 0.00     | 0.00     | 0.00     | 0.00     | 0.00     | 0.00     | 0.00     | 0.00     | 0.04     |
| GH24       | 0.20     | 0.18     | 0.16     | 0.18     | 0.14     | 0.39     | 0.14     | 0.16     | 0.16     | 0.23     | 0.15     | 0.20     | 0.14     | 0.18     | 0.40     | 0.33     |
| GH90       | 0.00     | 0.00     | 0.00     | 0.00     | 0.00     | 0.00     | 0.00     | 0.00     | 0.00     | 0.00     | 0.00     | 0.00     | 0.00     | 0.00     | 0.00     | 0.00     |
| GH57       | 0.15     | 0.11     | 0.05     | 0.18     | 0.04     | 0.09     | 0.12     | 0.13     | 0.12     | 0.07     | 0.10     | 0.10     | 0.09     | 0.05     | 0.10     | 0.15     |
| GH36       | 0.76     | 1.01     | 0.63     | 0.38     | 0.52     | 0.37     | 0.87     | 0.97     | 0.54     | 0.48     | 0.64     | 0.60     | 0.62     | 0.47     | 0.70     | 0.51     |
| GT46       | 0.00     | 0.00     | 0.00     | 0.00     | 0.00     | 0.00     | 0.00     | 0.00     | 0.00     | 0.00     | 0.00     | 0.00     | 0.00     | 0.00     | 0.00     | 0.00     |
| GH66       | 0.04     | 0.07     | 0.02     | 0.00     | 0.03     | 0.06     | 0.03     | 0.00     | 0.00     | 0.01     | 0.01     | 0.00     | 0.03     | 0.03     | 0.03     | 0.00     |

Normalized\_abundance\_2

| CAZY_group | CN-AD-71 | CN-AD-72 | CN-AD-73 | CN-AD-74 | CN-AD-75 | CN-AD-76 | CN-AD-77 | CN-AD-78 | CN-AD-79 | CN-AD-80 | CN-AD-81 | CN-AD-82 | CN-AD-83 | CN-AD-84 | CN-AD-85 | CN-AD-86 |
|------------|----------|----------|----------|----------|----------|----------|----------|----------|----------|----------|----------|----------|----------|----------|----------|----------|
| GH48       | 0.00     | 0.00     | 0.00     | 0.00     | 0.00     | 0.00     | 0.00     | 0.00     | 0.00     | 0.00     | 0.00     | 0.00     | 0.00     | 0.00     | 0.00     | 0.00     |
| GT53       | 0.00     | 0.00     | 0.00     | 0.00     | 0.00     | 0.00     | 0.00     | 0.00     | 0.00     | 0.00     | 0.00     | 0.00     | 0.00     | 0.00     | 0.00     | 0.00     |
| GH60       | 0.00     | 0.00     | 0.00     | 0.00     | 0.00     | 0.00     | 0.00     | 0.00     | 0.00     | 0.00     | 0.00     | 0.00     | 0.00     | 0.00     | 0.00     | 0.00     |
| GT31       | 0.00     | 0.00     | 0.00     | 0.00     | 0.00     | 0.00     | 0.02     | 0.00     | 0.00     | 0.00     | 0.00     | 0.00     | 0.00     | 0.00     | 0.03     | 0.04     |
| GH105      | 1.07     | 0.63     | 0.39     | 0.64     | 0.43     | 0.19     | 0.98     | 1.00     | 0.35     | 0.23     | 0.53     | 0.67     | 0.55     | 0.52     | 0.55     | 0.26     |
| GT23       | 0.02     | 0.02     | 0.00     | 0.06     | 0.00     | 0.00     | 0.00     | 0.00     | 0.00     | 0.00     | 0.01     | 0.00     | 0.00     | 0.00     | 0.03     | 0.00     |
| GH11       | 0.00     | 0.00     | 0.02     | 0.00     | 0.01     | 0.00     | 0.00     | 0.00     | 0.00     | 0.00     | 0.00     | 0.00     | 0.00     | 0.00     | 0.00     | 0.00     |
| GT38       | 0.00     | 0.00     | 0.00     | 0.00     | 0.00     | 0.00     | 0.00     | 0.00     | 0.00     | 0.00     | 0.00     | 0.00     | 0.00     | 0.00     | 0.00     | 0.00     |
| GT43       | 0.00     | 0.00     | 0.00     | 0.00     | 0.00     | 0.00     | 0.00     | 0.00     | 0.00     | 0.00     | 0.00     | 0.00     | 0.00     | 0.00     | 0.00     | 0.00     |
| GH99       | 0.02     | 0.04     | 0.00     | 0.00     | 0.00     | 0.00     | 0.02     | 0.00     | 0.00     | 0.00     | 0.04     | 0.00     | 0.03     | 0.00     | 0.00     | 0.00     |
| GH38       | 0.35     | 0.20     | 0.06     | 0.06     | 0.16     | 0.11     | 0.19     | 0.10     | 0.14     | 0.16     | 0.24     | 0.22     | 0.21     | 0.31     | 0.25     | 0.44     |
| GH109      | 0.33     | 0.34     | 0.29     | 0.35     | 0.16     | 0.20     | 0.37     | 0.55     | 0.23     | 0.10     | 0.09     | 0.30     | 0.10     | 0.23     | 0.18     | 0.26     |
| GH2        | 5.29     | 4.73     | 2.97     | 3.94     | 2.99     | 2.67     | 4.84     | 4.79     | 2.35     | 2.38     | 3.16     | 4.40     | 4.15     | 2.34     | 2.68     | 3.81     |
| GT28       | 0.35     | 0.25     | 0.31     | 0.38     | 0.31     | 0.23     | 0.25     | 0.21     | 0.35     | 0.27     | 0.34     | 0.25     | 0.29     | 0.23     | 0.48     | 0.22     |
| GH42       | 0.15     | 0.13     | 0.16     | 0.20     | 0.14     | 0.09     | 0.11     | 0.08     | 0.14     | 0.06     | 0.15     | 0.15     | 0.12     | 0.03     | 0.10     | 0.00     |
| GT58       | 0.00     | 0.00     | 0.00     | 0.00     | 0.00     | 0.00     | 0.00     | 0.00     | 0.00     | 0.00     | 0.00     | 0.00     | 0.00     | 0.00     | 0.00     | 0.00     |
| GH61       | 0.00     | 0.00     | 0.00     | 0.00     | 0.00     | 0.00     | 0.00     | 0.00     | 0.00     | 0.00     | 0.00     | 0.00     | 0.00     | 0.00     | 0.00     | 0.00     |
| GH80       | 0.00     | 0.00     | 0.00     | 0.00     | 0.00     | 0.00     | 0.00     | 0.00     | 0.00     | 0.00     | 0.00     | 0.00     | 0.00     | 0.00     | 0.00     | 0.00     |
| GH98       | 0.00     | 0.02     | 0.00     | 0.00     | 0.00     | 0.00     | 0.00     | 0.00     | 0.00     | 0.01     | 0.00     | 0.00     | 0.00     | 0.03     | 0.00     | 0.00     |
| GH6        | 0.00     | 0.00     | 0.00     | 0.00     | 0.00     | 0.00     | 0.00     | 0.00     | 0.00     | 0.00     | 0.00     | 0.00     | 0.00     | 0.00     | 0.00     | 0.00     |
| GT1        | 0.02     | 0.04     | 0.03     | 0.03     | 0.03     | 0.05     | 0.03     | 0.00     | 0.02     | 0.03     | 0.01     | 0.05     | 0.02     | 0.00     | 0.00     | 0.07     |
| GH28       | 1.35     | 1.50     | 0.86     | 1.05     | 0.73     | 0.45     | 1.38     | 1.07     | 0.66     | 0.44     | 0.65     | 0.87     | 0.93     | 0.62     | 0.53     | 0.37     |
| GT42       | 0.00     | 0.00     | 0.00     | 0.00     | 0.00     | 0.00     | 0.00     | 0.00     | 0.00     | 0.00     | 0.00     | 0.00     | 0.00     | 0.00     | 0.00     | 0.00     |
| GH128      | 0.00     | 0.00     | 0.00     | 0.00     | 0.00     | 0.00     | 0.00     | 0.00     | 0.00     | 0.00     | 0.00     | 0.00     | 0.00     | 0.00     | 0.00     | 0.00     |
| CE12       | 0.26     | 0.22     | 0.29     | 0.12     | 0.10     | 0.09     | 0.22     | 0.13     | 0.04     | 0.04     | 0.21     | 0.07     | 0.10     | 0.13     | 0.05     | 0.04     |
| CE16       | 0.00     | 0.00     | 0.00     | 0.00     | 0.00     | 0.00     | 0.00     | 0.00     | 0.00     | 0.00     | 0.00     | 0.00     | 0.00     | 0.00     | 0.00     | 0.00     |
| GT89       | 0.00     | 0.00     | 0.00     | 0.00     | 0.00     | 0.00     | 0.00     | 0.00     | 0.00     | 0.00     | 0.00     | 0.00     | 0.00     | 0.00     | 0.00     | 0.00     |
| GT11       | 0.09     | 0.07     | 0.08     | 0.12     | 0.04     | 0.05     | 0.06     | 0.05     | 0.06     | 0.01     | 0.04     | 0.10     | 0.05     | 0.05     | 0.10     | 0.04     |
| GT77       | 0.00     | 0.02     | 0.00     | 0.00     | 0.00     | 0.00     | 0.02     | 0.00     | 0.00     | 0.01     | 0.00     | 0.02     | 0.00     | 0.00     | 0.05     | 0.04     |
| GT55       | 0.00     | 0.00     | 0.00     | 0.00     | 0.00     | 0.00     | 0.00     | 0.00     | 0.00     | 0.00     | 0.00     | 0.00     | 0.00     | 0.00     | 0.00     | 0.00     |
| GT18       | 0.00     | 0.00     | 0.00     | 0.00     | 0.00     | 0.00     | 0.00     | 0.00     | 0.00     | 0.00     | 0.00     | 0.00     | 0.00     | 0.00     | 0.00     | 0.00     |
| GH87       | 0.00     | 0.00     | 0.00     | 0.00     | 0.03     | 0.00     | 0.00     | 0.00     | 0.00     | 0.00     | 0.01     | 0.00     | 0.00     | 0.00     | 0.00     | 0.00     |
| PL5        | 0.00     | 0.00     | 0.00     | 0.00     | 0.00     | 0.00     | 0.00     | 0.00     | 0.00     | 0.00     | 0.00     | 0.00     | 0.00     | 0.00     | 0.00     | 0.00     |
| GH22       | 0.00     | 0.00     | 0.00     | 0.00     | 0.00     | 0.00     | 0.00     | 0.00     | 0.00     | 0.00     | 0.00     | 0.00     | 0.00     | 0.00     | 0.00     | 0.00     |
| CE2        | 0.04     | 0.07     | 0.03     | 0.00     | 0.08     | 0.00     | 0.12     | 0.03     | 0.04     | 0.06     | 0.02     | 0.02     | 0.03     | 0.00     | 0.00     | 0.04     |
| GH120      | 0.07     | 0.07     | 0.06     | 0.00     | 0.07     | 0.03     | 0.03     | 0.00     | 0.01     | 0.02     | 0.02     | 0.02     | 0.07     | 0.00     | 0.05     | 0.04     |
| GH73       | 0.33     | 0.34     | 0.34     | 0.26     | 0.39     | 0.22     | 0.26     | 0.45     | 0.29     | 0.35     | 0.32     | 0.30     | 0.31     | 0.29     | 0.45     | 0.33     |
| GT17       | 0.00     | 0.00     | 0.00     | 0.00     | 0.01     | 0.00     | 0.00     | 0.00     | 0.00     | 0.00     | 0.00     | 0.00     | 0.00     | 0.00     | 0.00     | 0.00     |
| GH124      | 0.00     | 0.00     | 0.00     | 0.00     | 0.00     | 0.00     | 0.00     | 0.00     | 0.00     | 0.00     | 0.00     | 0.00     | 0.00     | 0.00     | 0.00     | 0.00     |
| GH54       | 0.00     | 0.00     | 0.00     | 0.00     | 0.00     | 0.00     | 0.00     | 0.00     | 0.00     | 0.00     | 0.00     | 0.00     | 0.00     | 0.00     | 0.00     | 0.00     |
| GH100      | 0.00     | 0.00     | 0.00     | 0.00     | 0.00     | 0.00     | 0.00     | 0.00     | 0.00     | 0.00     | 0.00     | 0.00     | 0.00     | 0.00     | 0.00     | 0.00     |
| GH113      | 0.02     | 0.00     | 0.03     | 0.00     | 0.00     | 0.00     | 0.03     | 0.00     | 0.02     | 0.03     | 0.04     | 0.00     | 0.02     | 0.03     | 0.00     | 0.00     |
| GT5        | 0.37     | 0.27     | 0.35     | 0.41     | 0.43     | 0.16     | 0.23     | 0.26     | 0.33     | 0.42     | 0.35     | 0.17     | 0.22     | 0.36     | 0.25     | 0.15     |
| GH94       | 0.37     | 0.22     | 0.61     | 0.47     | 0.77     | 0.06     | 0.16     | 0.10     | 0.39     | 0.32     | 0.53     | 0.02     | 0.22     | 0.39     | 0.08     | 0.00     |
| GT66       | 0.00     | 0.00     | 0.00     | 0.00     | 0.00     | 0.00     | 0.00     | 0.00     | 0.00     | 0.00     | 0.00     | 0.00     | 0.00     | 0.00     | 0.00     | 0.00     |
| GT94       | 0.00     | 0.00     | 0.00     | 0.00     | 0.00     | 0.00     | 0.00     | 0.00     | 0.00     | 0.00     | 0.00     | 0.00     | 0.00     | 0.00     | 0.00     | 0.00     |
| GH58       | 0.00     | 0.00     | 0.00     | 0.00     | 0.00     | 0.00     | 0.00     | 0.00     | 0.00     | 0.00     | 0.00     | 0.00     | 0.00     | 0.00     | 0.00     | 0.04     |
| GH1        | 0.52     | 0.22     | 0.29     | 0.20     | 0.49     | 0.09     | 0.33     | 0.13     | 0.19     | 0.27     | 0.34     | 0.12     | 0.12     | 0.26     | 0.30     | 0.18     |
| PL22       | 0.00     | 0.00     | 0.00     | 0.00     | 0.00     | 0.00     | 0.00     | 0.00     | 0.00     | 0.00     | 0.00     | 0.00     | 0.00     | 0.00     | 0.00     | 0.00     |
| GT9        | 0.17     | 0.09     | 0.05     | 0.23     | 0.07     | 0.12     | 0.08     | 0.13     | 0.08     | 0.04     | 0.15     | 0.22     | 0.17     | 0.13     | 0.23     | 0.07     |

## Normalized\_abundance\_2

| CAZY_group | CN-AD-71 | CN-AD-72 | CN-AD-73 | CN-AD-74 | CN-AD-75 | CN-AD-76 | CN-AD-77 | CN-AD-78 | CN-AD-79 | CN-AD-80 | CN-AD-81 | CN-AD-82 | CN-AD-83 | CN-AD-84 | CN-AD-85 | CN-AD-86 |
|------------|----------|----------|----------|----------|----------|----------|----------|----------|----------|----------|----------|----------|----------|----------|----------|----------|
| GT76       | 0.00     | 0.00     | 0.00     | 0.00     | 0.00     | 0.00     | 0.00     | 0.00     | 0.00     | 0.00     | 0.00     | 0.00     | 0.00     | 0.00     | 0.00     | 0.00     |
| GT32       | 0.15     | 0.07     | 0.03     | 0.09     | 0.08     | 0.08     | 0.09     | 0.05     | 0.12     | 0.04     | 0.06     | 0.17     | 0.05     | 0.08     | 0.00     | 0.15     |
| GT47       | 0.00     | 0.02     | 0.05     | 0.06     | 0.02     | 0.02     | 0.05     | 0.00     | 0.00     | 0.00     | 0.04     | 0.02     | 0.00     | 0.00     | 0.05     | 0.04     |
| GH84       | 0.11     | 0.09     | 0.10     | 0.20     | 0.08     | 0.09     | 0.11     | 0.13     | 0.10     | 0.06     | 0.06     | 0.12     | 0.09     | 0.08     | 0.25     | 0.15     |
| GH83       | 0.00     | 0.00     | 0.00     | 0.00     | 0.00     | 0.00     | 0.00     | 0.00     | 0.00     | 0.00     | 0.00     | 0.00     | 0.00     | 0.00     | 0.00     | 0.00     |
| GT59       | 0.00     | 0.00     | 0.00     | 0.00     | 0.00     | 0.00     | 0.00     | 0.00     | 0.00     | 0.00     | 0.00     | 0.00     | 0.00     | 0.00     | 0.00     | 0.00     |
| GH34       | 0.00     | 0.00     | 0.00     | 0.00     | 0.00     | 0.00     | 0.00     | 0.00     | 0.00     | 0.00     | 0.00     | 0.00     | 0.00     | 0.00     | 0.00     | 0.00     |
| GT14       | 0.07     | 0.09     | 0.02     | 0.00     | 0.00     | 0.00     | 0.02     | 0.05     | 0.02     | 0.03     | 0.05     | 0.05     | 0.02     | 0.05     | 0.03     | 0.04     |
| GH47       | 0.00     | 0.00     | 0.00     | 0.00     | 0.00     | 0.00     | 0.00     | 0.00     | 0.00     | 0.00     | 0.00     | 0.00     | 0.00     | 0.00     | 0.00     | 0.00     |
| GH97       | 1.09     | 1.05     | 0.42     | 1.20     | 0.48     | 0.53     | 1.09     | 0.97     | 0.49     | 0.31     | 0.48     | 1.04     | 0.77     | 0.68     | 0.80     | 0.95     |
| GH50       | 0.02     | 0.11     | 0.00     | 0.00     | 0.02     | 0.02     | 0.06     | 0.00     | 0.04     | 0.00     | 0.10     | 0.05     | 0.05     | 0.00     | 0.00     | 0.07     |
| GT26       | 0.13     | 0.20     | 0.19     | 0.12     | 0.17     | 0.14     | 0.19     | 0.24     | 0.10     | 0.10     | 0.18     | 0.25     | 0.21     | 0.18     | 0.15     | 0.11     |
| GH18       | 0.52     | 0.63     | 0.32     | 0.35     | 0.28     | 0.41     | 0.68     | 0.37     | 0.45     | 0.34     | 0.61     | 0.62     | 0.64     | 0.39     | 0.35     | 0.44     |
| GH37       | 0.00     | 0.00     | 0.00     | 0.00     | 0.00     | 0.06     | 0.00     | 0.00     | 0.00     | 0.00     | 0.02     | 0.02     | 0.00     | 0.05     | 0.05     | 0.11     |
| PL13       | 0.13     | 0.04     | 0.00     | 0.06     | 0.01     | 0.00     | 0.08     | 0.05     | 0.04     | 0.00     | 0.02     | 0.07     | 0.07     | 0.03     | 0.03     | 0.04     |
| GH27       | 0.26     | 0.22     | 0.23     | 0.15     | 0.18     | 0.11     | 0.20     | 0.18     | 0.19     | 0.07     | 0.28     | 0.42     | 0.21     | 0.10     | 0.05     | 0.15     |
| GT54       | 0.00     | 0.00     | 0.00     | 0.00     | 0.00     | 0.00     | 0.00     | 0.00     | 0.00     | 0.00     | 0.00     | 0.00     | 0.00     | 0.00     | 0.00     | 0.00     |
| GT91       | 0.00     | 0.00     | 0.00     | 0.00     | 0.00     | 0.00     | 0.00     | 0.00     | 0.00     | 0.00     | 0.00     | 0.00     | 0.00     | 0.00     | 0.00     | 0.00     |
| GT72       | 0.00     | 0.00     | 0.00     | 0.00     | 0.00     | 0.00     | 0.00     | 0.00     | 0.00     | 0.00     | 0.00     | 0.00     | 0.00     | 0.00     | 0.00     | 0.00     |
| GH67       | 0.15     | 0.09     | 0.05     | 0.18     | 0.08     | 0.03     | 0.06     | 0.13     | 0.06     | 0.01     | 0.07     | 0.15     | 0.05     | 0.05     | 0.08     | 0.00     |
| GH12       | 0.00     | 0.00     | 0.00     | 0.00     | 0.00     | 0.00     | 0.00     | 0.00     | 0.00     | 0.00     | 0.00     | 0.00     | 0.00     | 0.00     | 0.00     | 0.00     |
| GH91       | 0.00     | 0.00     | 0.00     | 0.00     | 0.00     | 0.02     | 0.03     | 0.05     | 0.02     | 0.01     | 0.00     | 0.02     | 0.03     | 0.00     | 0.03     | 0.00     |
| GT69       | 0.00     | 0.00     | 0.00     | 0.00     | 0.00     | 0.00     | 0.00     | 0.00     | 0.00     | 0.00     | 0.00     | 0.00     | 0.00     | 0.00     | 0.00     | 0.00     |
| GH106      | 0.57     | 0.27     | 0.19     | 0.26     | 0.13     | 0.17     | 0.42     | 0.37     | 0.10     | 0.07     | 0.11     | 0.30     | 0.29     | 0.16     | 0.15     | 0.22     |
| GT62       | 0.00     | 0.00     | 0.00     | 0.00     | 0.00     | 0.00     | 0.00     | 0.00     | 0.00     | 0.00     | 0.00     | 0.00     | 0.00     | 0.00     | 0.00     | 0.00     |
| GH17       | 0.00     | 0.00     | 0.00     | 0.00     | 0.00     | 0.00     | 0.00     | 0.00     | 0.02     | 0.00     | 0.00     | 0.00     | 0.00     | 0.00     | 0.00     | 0.00     |
| GH88       | 0.37     | 0.63     | 0.16     | 0.44     | 0.30     | 0.19     | 0.62     | 0.42     | 0.19     | 0.16     | 0.22     | 0.47     | 0.36     | 0.10     | 0.20     | 0.18     |
| CE5        | 0.00     | 0.00     | 0.00     | 0.00     | 0.00     | 0.00     | 0.00     | 0.00     | 0.00     | 0.00     | 0.00     | 0.00     | 0.00     | 0.00     | 0.00     | 0.00     |
| GT8        | 0.04     | 0.13     | 0.05     | 0.20     | 0.09     | 0.06     | 0.17     | 0.13     | 0.16     | 0.01     | 0.09     | 0.15     | 0.09     | 0.10     | 0.15     | 0.11     |
| GT50       | 0.00     | 0.00     | 0.00     | 0.00     | 0.00     | 0.00     | 0.00     | 0.00     | 0.00     | 0.00     | 0.00     | 0.00     | 0.00     | 0.00     | 0.00     | 0.00     |
| GT20       | 0.11     | 0.09     | 0.03     | 0.09     | 0.03     | 0.16     | 0.06     | 0.16     | 0.04     | 0.04     | 0.04     | 0.12     | 0.12     | 0.10     | 0.10     | 0.26     |
| PL9        | 0.20     | 0.22     | 0.18     | 0.09     | 0.03     | 0.02     | 0.22     | 0.03     | 0.04     | 0.14     | 0.13     | 0.05     | 0.07     | 0.26     | 0.08     | 0.00     |
| GH55       | 0.02     | 0.04     | 0.03     | 0.03     | 0.04     | 0.00     | 0.05     | 0.08     | 0.08     | 0.03     | 0.02     | 0.02     | 0.02     | 0.03     | 0.03     | 0.04     |
| GH64       | 0.00     | 0.00     | 0.00     | 0.03     | 0.00     | 0.00     | 0.00     | 0.00     | 0.00     | 0.00     | 0.00     | 0.00     | 0.00     | 0.00     | 0.00     | 0.00     |
| GH127      | 0.39     | 0.27     | 0.19     | 0.20     | 0.31     | 0.27     | 0.29     | 0.50     | 0.16     | 0.08     | 0.21     | 0.30     | 0.36     | 0.16     | 0.25     | 0.48     |
| GH103      | 0.00     | 0.00     | 0.00     | 0.00     | 0.00     | 0.03     | 0.00     | 0.00     | 0.00     | 0.00     | 0.00     | 0.00     | 0.00     | 0.05     | 0.05     | 0.04     |
| GH3        | 3.51     | 2.35     | 2.00     | 1.96     | 2.65     | 1.56     | 2.89     | 2.91     | 1.81     | 1.82     | 1.98     | 2.79     | 2.32     | 1.71     | 1.68     | 2.27     |
| GT45       | 0.00     | 0.00     | 0.00     | 0.00     | 0.00     | 0.00     | 0.00     | 0.00     | 0.00     | 0.00     | 0.00     | 0.00     | 0.00     | 0.00     | 0.03     | 0.00     |
| GT74       | 0.00     | 0.00     | 0.00     | 0.00     | 0.00     | 0.00     | 0.00     | 0.00     | 0.00     | 0.00     | 0.00     | 0.00     | 0.00     | 0.00     | 0.00     | 0.00     |
| GT90       | 0.00     | 0.00     | 0.00     | 0.00     | 0.00     | 0.00     | 0.00     | 0.00     | 0.00     | 0.00     | 0.00     | 0.00     | 0.00     | 0.00     | 0.00     | 0.00     |
| GH116      | 0.02     | 0.09     | 0.08     | 0.09     | 0.04     | 0.05     | 0.05     | 0.08     | 0.12     | 0.08     | 0.05     | 0.10     | 0.00     | 0.08     | 0.05     | 0.07     |
| GH31       | 1.20     | 1.32     | 1.00     | 0.88     | 0.88     | 0.72     | 1.15     | 1.20     | 0.66     | 0.52     | 0.87     | 1.24     | 0.95     | 0.65     | 0.73     | 0.77     |
| GT12       | 0.00     | 0.00     | 0.00     | 0.00     | 0.00     | 0.00     | 0.00     | 0.00     | 0.00     | 0.00     | 0.00     | 0.00     | 0.00     | 0.00     | 0.00     | 0.00     |
| CE1        | 0.46     | 0.29     | 0.34     | 0.56     | 0.31     | 0.41     | 0.39     | 0.42     | 0.37     | 0.31     | 0.27     | 0.32     | 0.31     | 0.29     | 0.35     | 0.48     |
| GH121      | 0.00     | 0.00     | 0.00     | 0.00     | 0.00     | 0.00     | 0.00     | 0.00     | 0.00     | 0.00     | 0.00     | 0.10     | 0.00     | 0.00     | 0.00     | 0.00     |
| GH79       | 0.00     | 0.00     | 0.00     | 0.00     | 0.01     | 0.00     | 0.00     | 0.00     | 0.00     | 0.00     | 0.01     | 0.00     | 0.00     | 0.00     | 0.00     | 0.00     |
| GT73       | 0.00     | 0.00     | 0.00     | 0.00     | 0.00     | 0.00     | 0.00     | 0.00     | 0.00     | 0.00     | 0.00     | 0.00     | 0.00     | 0.00     | 0.00     | 0.00     |
| GH77       | 0.54     | 0.47     | 0.60     | 0.61     | 0.51     | 0.27     | 0.57     | 0.47     | 0.41     | 0.44     | 0.43     | 0.32     | 0.38     | 0.39     | 0.43     | 0.40     |
| PL17       | 0.00     | 0.00     | 0.05     | 0.03     | 0.02     | 0.02     | 0.05     | 0.00     | 0.00     | 0.01     | 0.02     | 0.07     | 0.00     | 0.00     | 0.00     | 0.00     |
| PL8        | 0.33     | 0.38     | 0.08     | 0.53     | 0.18     | 0.23     | 0.37     | 0.45     | 0.19     | 0.16     | 0.21     | 0.35     | 0.34     | 0.26     | 0.23     | 0.26     |

## Normalized\_abundance\_2

| CAZY_group | CN-AD-71 | CN-AD-72 | CN-AD-73 | CN-AD-74 | CN-AD-75 | CN-AD-76 | CN-AD-77 | CN-AD-78 | CN-AD-79 | CN-AD-80 | CN-AD-81 | CN-AD-82 | CN-AD-83 | CN-AD-84 | CN-AD-85 | CN-AD-86 |
|------------|----------|----------|----------|----------|----------|----------|----------|----------|----------|----------|----------|----------|----------|----------|----------|----------|
| CE9        | 0.46     | 0.38     | 0.32     | 0.29     | 0.32     | 0.28     | 0.43     | 0.37     | 0.16     | 0.32     | 0.29     | 0.30     | 0.29     | 0.26     | 0.35     | 0.40     |
| CE15       | 0.00     | 0.02     | 0.02     | 0.00     | 0.00     | 0.02     | 0.05     | 0.03     | 0.00     | 0.00     | 0.00     | 0.00     | 0.02     | 0.00     | 0.00     | 0.00     |
| GT79       | 0.00     | 0.00     | 0.00     | 0.00     | 0.00     | 0.00     | 0.00     | 0.00     | 0.00     | 0.00     | 0.00     | 0.00     | 0.00     | 0.00     | 0.00     | 0.00     |
| GT10       | 0.00     | 0.00     | 0.00     | 0.00     | 0.00     | 0.00     | 0.02     | 0.00     | 0.00     | 0.01     | 0.00     | 0.00     | 0.00     | 0.00     | 0.00     | 0.07     |
| GH119      | 0.00     | 0.00     | 0.00     | 0.00     | 0.00     | 0.00     | 0.00     | 0.00     | 0.00     | 0.00     | 0.00     | 0.00     | 0.00     | 0.00     | 0.00     | 0.00     |
| GH16       | 0.30     | 0.29     | 0.13     | 0.23     | 0.16     | 0.16     | 0.31     | 0.50     | 0.16     | 0.14     | 0.12     | 0.45     | 0.21     | 0.16     | 0.08     | 0.22     |
| GH43       | 2.81     | 2.69     | 1.66     | 2.92     | 1.73     | 1.34     | 2.93     | 2.85     | 1.90     | 1.13     | 2.06     | 2.69     | 2.43     | 1.14     | 1.55     | 1.43     |
| GH51       | 0.57     | 0.56     | 0.40     | 0.58     | 0.40     | 0.47     | 0.65     | 0.52     | 0.49     | 0.31     | 0.39     | 0.62     | 0.50     | 0.23     | 0.18     | 0.55     |
| GT35       | 0.74     | 0.83     | 1.02     | 0.73     | 0.94     | 0.33     | 0.76     | 0.47     | 0.82     | 0.73     | 0.77     | 0.55     | 0.59     | 0.78     | 0.63     | 0.29     |
| GT25       | 0.00     | 0.00     | 0.00     | 0.00     | 0.00     | 0.00     | 0.00     | 0.00     | 0.00     | 0.00     | 0.00     | 0.05     | 0.00     | 0.00     | 0.00     | 0.00     |
| GT2        | 4.48     | 3.52     | 3.90     | 4.65     | 3.71     | 2.58     | 4.73     | 3.88     | 3.15     | 2.72     | 3.07     | 4.70     | 2.84     | 2.96     | 4.01     | 5.53     |
| GT51       | 0.81     | 0.58     | 0.74     | 0.67     | 0.73     | 0.62     | 0.96     | 0.84     | 0.49     | 0.54     | 0.71     | 0.92     | 0.88     | 0.60     | 1.15     | 1.02     |
| GH107      | 0.00     | 0.00     | 0.00     | 0.00     | 0.00     | 0.00     | 0.00     | 0.00     | 0.00     | 0.00     | 0.00     | 0.00     | 0.00     | 0.00     | 0.00     | 0.00     |
| GH7        | 0.00     | 0.00     | 0.00     | 0.00     | 0.00     | 0.00     | 0.00     | 0.00     | 0.00     | 0.00     | 0.00     | 0.00     | 0.00     | 0.00     | 0.00     | 0.00     |
| GT7        | 0.00     | 0.00     | 0.00     | 0.00     | 0.00     | 0.00     | 0.00     | 0.00     | 0.00     | 0.00     | 0.00     | 0.00     | 0.00     | 0.00     | 0.00     | 0.00     |
| GT36       | 0.00     | 0.00     | 0.00     | 0.00     | 0.00     | 0.00     | 0.00     | 0.00     | 0.00     | 0.00     | 0.00     | 0.00     | 0.00     | 0.00     | 0.00     | 0.00     |
| PL7        | 0.00     | 0.00     | 0.00     | 0.00     | 0.00     | 0.00     | 0.00     | 0.00     | 0.00     | 0.00     | 0.00     | 0.00     | 0.00     | 0.00     | 0.00     | 0.00     |
| GH110      | 0.24     | 0.09     | 0.10     | 0.12     | 0.07     | 0.05     | 0.12     | 0.26     | 0.06     | 0.03     | 0.06     | 0.27     | 0.15     | 0.08     | 0.18     | 0.18     |
| GT21       | 0.00     | 0.00     | 0.00     | 0.00     | 0.00     | 0.00     | 0.00     | 0.00     | 0.00     | 0.00     | 0.00     | 0.00     | 0.00     | 0.00     | 0.00     | 0.00     |
| GH62       | 0.00     | 0.00     | 0.00     | 0.00     | 0.00     | 0.00     | 0.00     | 0.00     | 0.00     | 0.00     | 0.00     | 0.00     | 0.00     | 0.00     | 0.00     | 0.00     |
| GH125      | 0.15     | 0.20     | 0.06     | 0.23     | 0.09     | 0.14     | 0.11     | 0.08     | 0.08     | 0.08     | 0.15     | 0.25     | 0.12     | 0.05     | 0.23     | 0.11     |
| GH117      | 0.09     | 0.07     | 0.06     | 0.03     | 0.08     | 0.11     | 0.17     | 0.18     | 0.10     | 0.06     | 0.06     | 0.10     | 0.05     | 0.05     | 0.05     | 0.11     |
| GH68       | 0.00     | 0.00     | 0.00     | 0.00     | 0.00     | 0.00     | 0.00     | 0.00     | 0.00     | 0.00     | 0.00     | 0.00     | 0.00     | 0.00     | 0.00     | 0.00     |
| GH85       | 0.04     | 0.00     | 0.02     | 0.06     | 0.00     | 0.00     | 0.00     | 0.00     | 0.00     | 0.00     | 0.02     | 0.00     | 0.00     | 0.00     | 0.05     | 0.00     |
| GH92       | 1.92     | 1.61     | 0.65     | 1.99     | 0.79     | 1.27     | 2.10     | 1.86     | 0.82     | 0.71     | 1.06     | 2.26     | 1.67     | 0.91     | 0.93     | 2.05     |
| GH40       | 0.00     | 0.00     | 0.00     | 0.00     | 0.00     | 0.00     | 0.00     | 0.00     | 0.00     | 0.00     | 0.00     | 0.00     | 0.00     | 0.00     | 0.00     | 0.00     |
| GT49       | 0.00     | 0.00     | 0.00     | 0.00     | 0.00     | 0.00     | 0.00     | 0.00     | 0.00     | 0.00     | 0.00     | 0.00     | 0.00     | 0.00     | 0.00     | 0.00     |
| GH112      | 0.22     | 0.11     | 0.15     | 0.03     | 0.17     | 0.06     | 0.20     | 0.13     | 0.10     | 0.21     | 0.16     | 0.05     | 0.12     | 0.10     | 0.05     | 0.00     |
| GT67       | 0.00     | 0.00     | 0.00     | 0.00     | 0.00     | 0.00     | 0.00     | 0.00     | 0.00     | 0.00     | 0.00     | 0.00     | 0.00     | 0.00     | 0.00     | 0.00     |
| CE8        | 0.35     | 0.29     | 0.29     | 0.26     | 0.14     | 0.16     | 0.25     | 0.34     | 0.16     | 0.17     | 0.21     | 0.17     | 0.19     | 0.10     | 0.15     | 0.07     |
| GT86       | 0.00     | 0.00     | 0.00     | 0.00     | 0.00     | 0.00     | 0.00     | 0.00     | 0.00     | 0.00     | 0.00     | 0.00     | 0.00     | 0.00     | 0.00     | 0.00     |
| GH101      | 0.00     | 0.00     | 0.00     | 0.00     | 0.00     | 0.00     | 0.00     | 0.00     | 0.00     | 0.00     | 0.00     | 0.00     | 0.00     | 0.00     | 0.18     | 0.04     |
| GH81       | 0.00     | 0.02     | 0.00     | 0.00     | 0.00     | 0.00     | 0.00     | 0.00     | 0.04     | 0.00     | 0.00     | 0.00     | 0.00     | 0.00     | 0.00     | 0.00     |
| GT93       | 0.00     | 0.00     | 0.00     | 0.00     | 0.00     | 0.00     | 0.00     | 0.00     | 0.00     | 0.00     | 0.00     | 0.00     | 0.00     | 0.00     | 0.00     | 0.00     |
| GT63       | 0.00     | 0.00     | 0.00     | 0.00     | 0.00     | 0.00     | 0.00     | 0.00     | 0.00     | 0.00     | 0.00     | 0.00     | 0.00     | 0.00     | 0.00     | 0.00     |
| CE11       | 0.24     | 0.22     | 0.23     | 0.29     | 0.16     | 0.19     | 0.28     | 0.21     | 0.16     | 0.11     | 0.23     | 0.17     | 0.24     | 0.34     | 0.23     | 0.40     |
| GT19       | 0.17     | 0.11     | 0.10     | 0.15     | 0.09     | 0.17     | 0.16     | 0.21     | 0.04     | 0.07     | 0.07     | 0.22     | 0.14     | 0.16     | 0.18     | 0.22     |
| GT33       | 0.00     | 0.00     | 0.00     | 0.00     | 0.00     | 0.00     | 0.00     | 0.00     | 0.00     | 0.00     | 0.00     | 0.00     | 0.00     | 0.00     | 0.00     | 0.00     |
| GH21       | 0.00     | 0.00     | 0.00     | 0.00     | 0.00     | 0.00     | 0.00     | 0.00     | 0.00     | 0.00     | 0.00     | 0.00     | 0.00     | 0.00     | 0.00     | 0.00     |
| GT68       | 0.00     | 0.00     | 0.00     | 0.00     | 0.00     | 0.00     | 0.00     | 0.00     | 0.00     | 0.00     | 0.00     | 0.00     | 0.00     | 0.00     | 0.00     | 0.00     |
| GH89       | 0.44     | 0.38     | 0.10     | 0.15     | 0.08     | 0.25     | 0.33     | 0.39     | 0.14     | 0.13     | 0.16     | 0.37     | 0.19     | 0.18     | 0.05     | 0.26     |
| GT82       | 0.00     | 0.00     | 0.00     | 0.00     | 0.01     | 0.00     | 0.00     | 0.00     | 0.00     | 0.00     | 0.00     | 0.00     | 0.00     | 0.00     | 0.00     | 0.00     |
| GH30       | 0.26     | 0.29     | 0.11     | 0.12     | 0.22     | 0.14     | 0.26     | 0.26     | 0.14     | 0.10     | 0.22     | 0.42     | 0.21     | 0.18     | 0.20     | 0.22     |
| GH20       | 1.35     | 1.21     | 0.63     | 1.11     | 0.67     | 0.72     | 1.63     | 1.62     | 0.51     | 0.49     | 0.71     | 1.57     | 0.88     | 0.52     | 0.80     | 1.35     |
| GH52       | 0.00     | 0.00     | 0.00     | 0.00     | 0.00     | 0.00     | 0.00     | 0.00     | 0.00     | 0.00     | 0.00     | 0.00     | 0.00     | 0.00     | 0.00     | 0.00     |
| GT84       | 0.00     | 0.00     | 0.06     | 0.00     | 0.00     | 0.00     | 0.00     | 0.00     | 0.04     | 0.00     | 0.04     | 0.00     | 0.00     | 0.03     | 0.00     | 0.00     |
| GT15       | 0.00     | 0.00     | 0.00     | 0.00     | 0.00     | 0.00     | 0.00     | 0.00     | 0.00     | 0.00     | 0.00     | 0.00     | 0.00     | 0.00     | 0.00     | 0.00     |
| GH93       | 0.02     | 0.07     | 0.00     | 0.00     | 0.00     | 0.00     | 0.00     | 0.00     | 0.00     | 0.00     | 0.02     | 0.02     | 0.00     | 0.00     | 0.00     | 0.00     |
| PL16       | 0.00     | 0.00     | 0.00     | 0.00     | 0.00     | 0.00     | 0.00     | 0.00     | 0.00     | 0.00     | 0.00     | 0.00     | 0.00     | 0.00     | 0.00     | 0.00     |
| GH26       | 0.04     | 0.02     | 0.11     | 0.20     | 0.19     | 0.03     | 0.12     | 0.10     | 0.21     | 0.16     | 0.11     | 0.12     | 0.07     | 0.13     | 0.00     | 0.07     |



## Normalized\_abundance\_2

| CAZY_group | CN-AD-71 | CN-AD-72 | CN-AD-73 | CN-AD-74 | CN-AD-75 | CN-AD-76 | CN-AD-77 | CN-AD-78 | CN-AD-79 | CN-AD-80 | CN-AD-81 | CN-AD-82 | CN-AD-83 | CN-AD-84 | CN-AD-85 | CN-AD-86 |
|------------|----------|----------|----------|----------|----------|----------|----------|----------|----------|----------|----------|----------|----------|----------|----------|----------|
| GT75       | 0.00     | 0.00     | 0.00     | 0.00     | 0.00     | 0.00     | 0.00     | 0.00     | 0.00     | 0.00     | 0.00     | 0.00     | 0.00     | 0.00     | 0.00     | 0.00     |
| GH53       | 0.07     | 0.04     | 0.26     | 0.20     | 0.13     | 0.00     | 0.19     | 0.05     | 0.12     | 0.08     | 0.20     | 0.00     | 0.07     | 0.18     | 0.10     | 0.04     |
| GT88       | 0.00     | 0.00     | 0.00     | 0.00     | 0.00     | 0.00     | 0.00     | 0.00     | 0.00     | 0.00     | 0.00     | 0.00     | 0.00     | 0.00     | 0.00     | 0.00     |
| GT24       | 0.00     | 0.00     | 0.00     | 0.00     | 0.00     | 0.00     | 0.00     | 0.00     | 0.00     | 0.00     | 0.00     | 0.00     | 0.00     | 0.00     | 0.00     | 0.00     |
| GT81       | 0.00     | 0.00     | 0.00     | 0.00     | 0.00     | 0.00     | 0.00     | 0.00     | 0.00     | 0.00     | 0.00     | 0.00     | 0.00     | 0.00     | 0.00     | 0.00     |
| GH4        | 0.11     | 0.04     | 0.05     | 0.00     | 0.07     | 0.08     | 0.03     | 0.00     | 0.04     | 0.11     | 0.13     | 0.07     | 0.14     | 0.18     | 0.35     | 0.22     |
| GT78       | 0.00     | 0.00     | 0.00     | 0.00     | 0.00     | 0.00     | 0.00     | 0.00     | 0.00     | 0.00     | 0.00     | 0.00     | 0.00     | 0.00     | 0.00     | 0.00     |
| GH8        | 0.09     | 0.00     | 0.13     | 0.06     | 0.08     | 0.02     | 0.05     | 0.00     | 0.04     | 0.06     | 0.10     | 0.02     | 0.05     | 0.03     | 0.10     | 0.04     |
| GH70       | 0.00     | 0.00     | 0.00     | 0.00     | 0.00     | 0.00     | 0.00     | 0.00     | 0.00     | 0.00     | 0.00     | 0.00     | 0.00     | 0.00     | 0.00     | 0.00     |
| GH122      | 0.00     | 0.00     | 0.00     | 0.00     | 0.00     | 0.00     | 0.00     | 0.00     | 0.00     | 0.00     | 0.00     | 0.00     | 0.00     | 0.00     | 0.00     | 0.00     |
| GH74       | 0.04     | 0.00     | 0.11     | 0.00     | 0.06     | 0.00     | 0.09     | 0.00     | 0.04     | 0.04     | 0.02     | 0.00     | 0.03     | 0.03     | 0.00     | 0.00     |
| GT41       | 0.00     | 0.00     | 0.02     | 0.00     | 0.00     | 0.00     | 0.00     | 0.00     | 0.00     | 0.00     | 0.00     | 0.00     | 0.02     | 0.00     | 0.00     | 0.04     |
| PL1        | 0.37     | 0.52     | 0.27     | 0.26     | 0.23     | 0.12     | 0.53     | 0.50     | 0.16     | 0.14     | 0.26     | 0.37     | 0.36     | 0.16     | 0.18     | 0.26     |
| GH15       | 0.04     | 0.02     | 0.06     | 0.06     | 0.02     | 0.02     | 0.05     | 0.08     | 0.00     | 0.03     | 0.01     | 0.07     | 0.03     | 0.00     | 0.03     | 0.11     |
| GH32       | 0.61     | 0.56     | 0.29     | 0.58     | 0.32     | 0.28     | 0.43     | 0.42     | 0.29     | 0.31     | 0.33     | 0.32     | 0.46     | 0.29     | 0.65     | 0.40     |
| GH44       | 0.00     | 0.00     | 0.02     | 0.00     | 0.03     | 0.00     | 0.00     | 0.00     | 0.00     | 0.03     | 0.00     | 0.00     | 0.00     | 0.00     | 0.00     | 0.00     |
| GT6        | 0.00     | 0.00     | 0.00     | 0.00     | 0.00     | 0.00     | 0.00     | 0.00     | 0.00     | 0.00     | 0.00     | 0.00     | 0.00     | 0.00     | 0.00     | 0.00     |
| GH13       | 2.44     | 2.31     | 3.10     | 3.21     | 2.95     | 1.47     | 2.72     | 2.04     | 2.16     | 2.06     | 2.65     | 1.74     | 2.36     | 2.05     | 2.26     | 1.76     |
| GT80       | 0.00     | 0.00     | 0.00     | 0.00     | 0.00     | 0.00     | 0.03     | 0.00     | 0.00     | 0.00     | 0.00     | 0.00     | 0.00     | 0.03     | 0.03     | 0.07     |
| GH71       | 0.00     | 0.00     | 0.00     | 0.00     | 0.00     | 0.00     | 0.00     | 0.00     | 0.00     | 0.00     | 0.00     | 0.00     | 0.00     | 0.00     | 0.00     | 0.00     |
| GH63       | 0.15     | 0.11     | 0.11     | 0.26     | 0.08     | 0.03     | 0.16     | 0.21     | 0.06     | 0.06     | 0.02     | 0.07     | 0.00     | 0.10     | 0.15     | 0.29     |
| PL21       | 0.04     | 0.00     | 0.03     | 0.12     | 0.03     | 0.06     | 0.05     | 0.05     | 0.04     | 0.06     | 0.02     | 0.07     | 0.00     | 0.05     | 0.08     | 0.00     |
| GH65       | 0.13     | 0.13     | 0.06     | 0.12     | 0.23     | 0.12     | 0.12     | 0.10     | 0.14     | 0.17     | 0.15     | 0.17     | 0.15     | 0.13     | 0.18     | 0.18     |
| CE4        | 0.52     | 0.49     | 0.68     | 0.47     | 0.47     | 0.34     | 0.51     | 0.45     | 0.49     | 0.42     | 0.54     | 0.32     | 0.38     | 0.42     | 0.45     | 0.29     |
| CE14       | 0.02     | 0.02     | 0.03     | 0.00     | 0.03     | 0.00     | 0.03     | 0.03     | 0.00     | 0.00     | 0.00     | 0.05     | 0.00     | 0.03     | 0.05     | 0.04     |
| GH115      | 0.44     | 0.31     | 0.21     | 0.35     | 0.18     | 0.14     | 0.31     | 0.39     | 0.08     | 0.07     | 0.23     | 0.42     | 0.40     | 0.13     | 0.13     | 0.18     |
| GH104      | 0.00     | 0.00     | 0.00     | 0.00     | 0.00     | 0.00     | 0.00     | 0.00     | 0.00     | 0.00     | 0.00     | 0.00     | 0.02     | 0.00     | 0.03     | 0.04     |
| GH111      | 0.00     | 0.00     | 0.00     | 0.00     | 0.00     | 0.00     | 0.00     | 0.00     | 0.00     | 0.00     | 0.00     | 0.00     | 0.00     | 0.00     | 0.00     | 0.00     |
| GH95       | 0.76     | 0.69     | 0.32     | 0.67     | 0.33     | 0.44     | 0.82     | 1.10     | 0.35     | 0.27     | 0.40     | 0.62     | 0.57     | 0.36     | 0.25     | 0.73     |
| GT70       | 0.00     | 0.00     | 0.00     | 0.00     | 0.00     | 0.00     | 0.00     | 0.00     | 0.00     | 0.00     | 0.00     | 0.00     | 0.00     | 0.00     | 0.00     | 0.00     |
| CE10       | 0.17     | 0.25     | 0.06     | 0.15     | 0.10     | 0.16     | 0.23     | 0.13     | 0.10     | 0.10     | 0.09     | 0.27     | 0.21     | 0.10     | 0.25     | 0.40     |
| GH10       | 0.09     | 0.09     | 0.10     | 0.32     | 0.19     | 0.05     | 0.11     | 0.05     | 0.04     | 0.08     | 0.15     | 0.12     | 0.17     | 0.10     | 0.10     | 0.00     |
| GH130      | 0.30     | 0.36     | 0.29     | 0.32     | 0.24     | 0.17     | 0.51     | 0.34     | 0.21     | 0.21     | 0.26     | 0.52     | 0.31     | 0.16     | 0.10     | 0.37     |
| PL20       | 0.00     | 0.00     | 0.00     | 0.00     | 0.00     | 0.00     | 0.00     | 0.00     | 0.00     | 0.00     | 0.00     | 0.00     | 0.00     | 0.00     | 0.00     | 0.00     |
| GH69       | 0.00     | 0.00     | 0.00     | 0.00     | 0.00     | 0.00     | 0.00     | 0.00     | 0.00     | 0.00     | 0.00     | 0.00     | 0.00     | 0.00     | 0.00     | 0.00     |
| PL2        | 0.00     | 0.00     | 0.00     | 0.00     | 0.00     | 0.00     | 0.00     | 0.00     | 0.00     | 0.00     | 0.00     | 0.00     | 0.02     | 0.00     | 0.00     | 0.00     |
| GH49       | 0.00     | 0.00     | 0.00     | 0.00     | 0.00     | 0.00     | 0.00     | 0.00     | 0.00     | 0.00     | 0.00     | 0.00     | 0.00     | 0.00     | 0.00     | 0.00     |
| GH25       | 0.22     | 0.27     | 0.39     | 0.38     | 0.42     | 0.16     | 0.34     | 0.31     | 0.29     | 0.42     | 0.32     | 0.15     | 0.29     | 0.36     | 0.40     | 0.15     |
| GH59       | 0.00     | 0.00     | 0.11     | 0.00     | 0.03     | 0.00     | 0.00     | 0.00     | 0.06     | 0.03     | 0.01     | 0.00     | 0.00     | 0.03     | 0.00     | 0.00     |
| GH35       | 0.74     | 0.38     | 0.18     | 0.23     | 0.24     | 0.27     | 0.50     | 0.55     | 0.19     | 0.14     | 0.23     | 0.67     | 0.46     | 0.31     | 0.25     | 0.62     |
| GT39       | 0.00     | 0.00     | 0.00     | 0.00     | 0.00     | 0.00     | 0.00     | 0.00     | 0.00     | 0.00     | 0.00     | 0.00     | 0.00     | 0.00     | 0.00     | 0.00     |
| GT57       | 0.00     | 0.00     | 0.00     | 0.00     | 0.00     | 0.00     | 0.00     | 0.00     | 0.00     | 0.00     | 0.00     | 0.00     | 0.00     | 0.00     | 0.00     | 0.00     |
| GH129      | 0.00     | 0.00     | 0.00     | 0.00     | 0.00     | 0.00     | 0.00     | 0.00     | 0.00     | 0.00     | 0.00     | 0.00     | 0.00     | 0.00     | 0.03     | 0.00     |
| GT22       | 0.00     | 0.00     | 0.00     | 0.00     | 0.00     | 0.00     | 0.00     | 0.00     | 0.00     | 0.00     | 0.00     | 0.00     | 0.00     | 0.00     | 0.00     | 0.00     |
| PL12       | 0.22     | 0.16     | 0.03     | 0.18     | 0.04     | 0.09     | 0.23     | 0.13     | 0.04     | 0.11     | 0.09     | 0.22     | 0.12     | 0.03     | 0.10     | 0.07     |
| PL18       | 0.00     | 0.00     | 0.00     | 0.00     | 0.00     | 0.00     | 0.00     | 0.00     | 0.00     | 0.00     | 0.00     | 0.00     | 0.00     | 0.00     | 0.00     | 0.00     |
| GT92       | 0.00     | 0.00     | 0.00     | 0.00     | 0.00     | 0.00     | 0.00     | 0.00     | 0.00     | 0.00     | 0.00     | 0.00     | 0.00     | 0.00     | 0.00     | 0.00     |
| GT44       | 0.00     | 0.00     | 0.00     | 0.00     | 0.00     | 0.00     | 0.00     | 0.00     | 0.00     | 0.00     | 0.00     | 0.00     | 0.00     | 0.00     | 0.00     | 0.00     |
| GT29       | 0.00     | 0.00     | 0.00     | 0.00     | 0.00     | 0.00     | 0.00     | 0.00     | 0.00     | 0.00     | 0.00     | 0.00     | 0.00     | 0.00     | 0.00     | 0.00     |
| GT13       | 0.00     | 0.00     | 0.00     | 0.00     | 0.00     | 0.00     | 0.00     | 0.00     | 0.00     | 0.00     | 0.00     | 0.00     | 0.00     | 0.00     | 0.00     | 0.00     |

Normalized\_abundance\_2

| CAZY_group | CN-AD-71 | CN-AD-72 | CN-AD-73 | CN-AD-74 | CN-AD-75 | CN-AD-76 | CN-AD-77 | CN-AD-78 | CN-AD-79 | CN-AD-80 | CN-AD-81 | CN-AD-82 | CN-AD-83 | CN-AD-84 | CN-AD-85 | CN-AD-86 |
|------------|----------|----------|----------|----------|----------|----------|----------|----------|----------|----------|----------|----------|----------|----------|----------|----------|
| GT52       | 0.00     | 0.00     | 0.00     | 0.00     | 0.00     | 0.00     | 0.00     | 0.00     | 0.00     | 0.00     | 0.00     | 0.00     | 0.00     | 0.00     | 0.00     | 0.00     |
| GT64       | 0.00     | 0.00     | 0.00     | 0.00     | 0.00     | 0.00     | 0.00     | 0.00     | 0.00     | 0.00     | 0.00     | 0.00     | 0.00     | 0.00     | 0.00     | 0.00     |
| GT85       | 0.00     | 0.00     | 0.00     | 0.00     | 0.00     | 0.00     | 0.00     | 0.00     | 0.00     | 0.00     | 0.00     | 0.00     | 0.00     | 0.00     | 0.00     | 0.00     |
| GT16       | 0.00     | 0.00     | 0.00     | 0.00     | 0.00     | 0.00     | 0.00     | 0.00     | 0.00     | 0.00     | 0.00     | 0.00     | 0.00     | 0.00     | 0.00     | 0.00     |
| GH56       | 0.00     | 0.00     | 0.00     | 0.00     | 0.00     | 0.00     | 0.00     | 0.00     | 0.00     | 0.00     | 0.00     | 0.00     | 0.00     | 0.00     | 0.00     | 0.00     |
| GT60       | 0.00     | 0.00     | 0.00     | 0.00     | 0.00     | 0.00     | 0.00     | 0.00     | 0.00     | 0.00     | 0.00     | 0.00     | 0.00     | 0.00     | 0.00     | 0.00     |
| GH41       | 0.00     | 0.00     | 0.00     | 0.00     | 0.00     | 0.00     | 0.00     | 0.00     | 0.00     | 0.00     | 0.00     | 0.00     | 0.00     | 0.00     | 0.00     | 0.00     |
| CE7        | 0.13     | 0.13     | 0.05     | 0.18     | 0.04     | 0.05     | 0.19     | 0.16     | 0.08     | 0.08     | 0.06     | 0.20     | 0.17     | 0.08     | 0.10     | 0.00     |
| GH39       | 0.02     | 0.02     | 0.03     | 0.12     | 0.03     | 0.00     | 0.05     | 0.00     | 0.06     | 0.04     | 0.13     | 0.00     | 0.05     | 0.00     | 0.03     | 0.04     |
| GT30       | 0.33     | 0.25     | 0.13     | 0.23     | 0.14     | 0.31     | 0.31     | 0.39     | 0.21     | 0.14     | 0.18     | 0.45     | 0.33     | 0.29     | 0.20     | 0.33     |
| PL15       | 0.17     | 0.16     | 0.02     | 0.09     | 0.01     | 0.17     | 0.16     | 0.16     | 0.08     | 0.07     | 0.05     | 0.25     | 0.09     | 0.03     | 0.03     | 0.11     |
| GH102      | 0.02     | 0.02     | 0.00     | 0.03     | 0.00     | 0.05     | 0.00     | 0.00     | 0.00     | 0.00     | 0.04     | 0.02     | 0.03     | 0.03     | 0.08     | 0.11     |

## Normalized\_abundance\_2

| CAZY_group | CN-AD-87 | CN-AD-88 | CN-AD-89 | CN-AD-90 | CN-AD-91 | CN-AD-92 | CN-AD-93 | CN-AD-94 | CN-AD-95 | CN-AD-96 | CN-AD-97 | CN-AD-98 | CN-AD-99 | CN-AD-100 | CN-AD-101 | CN-AD-102 |
|------------|----------|----------|----------|----------|----------|----------|----------|----------|----------|----------|----------|----------|----------|-----------|-----------|-----------|
| GH29       | 0.17     | 0.80     | 0.82     | 0.31     | 0.64     | 0.64     | 0.84     | 0.46     | 0.49     | 0.68     | 0.58     | 0.54     | 0.52     | 0.69      | 0.51      | 0.62      |
| PL4        | 0.00     | 0.00     | 0.00     | 0.00     | 0.00     | 0.00     | 0.00     | 0.00     | 0.00     | 0.00     | 0.00     | 0.00     | 0.00     | 0.00      | 0.00      | 0.00      |
| GH23       | 0.86     | 1.48     | 1.11     | 1.18     | 0.86     | 0.85     | 0.93     | 1.09     | 0.54     | 0.99     | 0.84     | 1.03     | 1.01     | 0.78      | 0.60      | 0.96      |
| CE6        | 0.03     | 0.05     | 0.08     | 0.05     | 0.07     | 0.04     | 0.01     | 0.08     | 0.10     | 0.06     | 0.02     | 0.03     | 0.06     | 0.07      | 0.11      | 0.03      |
| GH72       | 0.06     | 0.12     | 0.08     | 0.03     | 0.09     | 0.11     | 0.08     | 0.08     | 0.05     | 0.07     | 0.08     | 0.08     | 0.06     | 0.02      | 0.17      | 0.03      |
| GH114      | 0.00     | 0.00     | 0.00     | 0.00     | 0.00     | 0.00     | 0.00     | 0.00     | 0.00     | 0.00     | 0.00     | 0.00     | 0.00     | 0.00      | 0.00      | 0.00      |
| GH78       | 0.17     | 0.99     | 0.87     | 0.65     | 0.75     | 0.57     | 0.69     | 0.32     | 0.10     | 0.91     | 0.62     | 0.49     | 1.00     | 0.84      | 0.17      | 0.51      |
| PL19       | 0.00     | 0.00     | 0.00     | 0.00     | 0.00     | 0.00     | 0.00     | 0.00     | 0.00     | 0.00     | 0.00     | 0.00     | 0.00     | 0.00      | 0.00      | 0.00      |
| GT27       | 0.00     | 0.00     | 0.00     | 0.00     | 0.00     | 0.00     | 0.00     | 0.00     | 0.00     | 0.00     | 0.00     | 0.00     | 0.00     | 0.00      | 0.00      | 0.00      |
| GH5        | 0.59     | 0.29     | 0.25     | 0.19     | 0.33     | 0.25     | 0.44     | 0.48     | 0.49     | 0.21     | 0.48     | 0.44     | 0.22     | 0.29      | 0.29      | 0.33      |
| GT40       | 0.00     | 0.00     | 0.00     | 0.00     | 0.00     | 0.00     | 0.00     | 0.00     | 0.00     | 0.00     | 0.00     | 0.00     | 0.00     | 0.00      | 0.00      | 0.00      |
| CE13       | 0.00     | 0.00     | 0.00     | 0.00     | 0.00     | 0.00     | 0.00     | 0.00     | 0.00     | 0.00     | 0.00     | 0.00     | 0.00     | 0.00      | 0.00      | 0.00      |
| GT37       | 0.00     | 0.00     | 0.00     | 0.00     | 0.00     | 0.00     | 0.00     | 0.00     | 0.00     | 0.00     | 0.00     | 0.00     | 0.00     | 0.00      | 0.00      | 0.00      |
| GH33       | 0.02     | 0.24     | 0.25     | 0.27     | 0.18     | 0.14     | 0.24     | 0.21     | 0.05     | 0.27     | 0.17     | 0.17     | 0.15     | 0.20      | 0.03      | 0.09      |
| GT65       | 0.00     | 0.00     | 0.00     | 0.00     | 0.00     | 0.00     | 0.00     | 0.00     | 0.00     | 0.00     | 0.00     | 0.00     | 0.00     | 0.00      | 0.00      | 0.00      |
| GH86       | 0.00     | 0.00     | 0.00     | 0.00     | 0.00     | 0.00     | 0.00     | 0.00     | 0.00     | 0.00     | 0.01     | 0.00     | 0.00     | 0.00      | 0.00      | 0.00      |
| GH123      | 0.00     | 0.12     | 0.12     | 0.10     | 0.04     | 0.14     | 0.15     | 0.11     | 0.05     | 0.15     | 0.11     | 0.05     | 0.14     | 0.22      | 0.09      | 0.08      |
| GH96       | 0.00     | 0.00     | 0.00     | 0.00     | 0.00     | 0.00     | 0.00     | 0.00     | 0.00     | 0.00     | 0.00     | 0.00     | 0.00     | 0.00      | 0.00      | 0.00      |
| GH14       | 0.00     | 0.00     | 0.00     | 0.00     | 0.00     | 0.00     | 0.00     | 0.00     | 0.00     | 0.00     | 0.00     | 0.00     | 0.00     | 0.00      | 0.00      | 0.00      |
| CE3        | 0.00     | 0.00     | 0.00     | 0.00     | 0.00     | 0.00     | 0.00     | 0.00     | 0.00     | 0.00     | 0.00     | 0.00     | 0.00     | 0.00      | 0.00      | 0.00      |
| PL10       | 0.08     | 0.24     | 0.17     | 0.07     | 0.11     | 0.18     | 0.13     | 0.06     | 0.20     | 0.09     | 0.09     | 0.14     | 0.11     | 0.20      | 0.06      | 0.11      |
| GT48       | 0.00     | 0.00     | 0.00     | 0.00     | 0.00     | 0.00     | 0.00     | 0.00     | 0.00     | 0.00     | 0.00     | 0.00     | 0.00     | 0.00      | 0.00      | 0.00      |
| PL6        | 0.00     | 0.00     | 0.00     | 0.00     | 0.00     | 0.00     | 0.01     | 0.00     | 0.00     | 0.01     | 0.00     | 0.00     | 0.00     | 0.00      | 0.00      | 0.01      |
| GT83       | 0.00     | 0.07     | 0.10     | 0.12     | 0.07     | 0.18     | 0.11     | 0.06     | 0.10     | 0.13     | 0.05     | 0.05     | 0.15     | 0.18      | 0.06      | 0.06      |
| GH126      | 0.00     | 0.00     | 0.00     | 0.00     | 0.00     | 0.00     | 0.00     | 0.00     | 0.00     | 0.00     | 0.00     | 0.00     | 0.00     | 0.00      | 0.00      | 0.00      |
| GH9        | 0.23     | 0.10     | 0.13     | 0.15     | 0.00     | 0.07     | 0.31     | 0.42     | 0.10     | 0.22     | 0.06     | 0.15     | 0.22     | 0.09      | 0.43      | 0.21      |
| GH75       | 0.00     | 0.00     | 0.00     | 0.00     | 0.00     | 0.00     | 0.00     | 0.00     | 0.00     | 0.00     | 0.00     | 0.00     | 0.00     | 0.00      | 0.00      | 0.00      |
| GT71       | 0.00     | 0.00     | 0.00     | 0.00     | 0.00     | 0.00     | 0.00     | 0.00     | 0.00     | 0.00     | 0.00     | 0.00     | 0.00     | 0.00      | 0.00      | 0.00      |
| GH46       | 0.00     | 0.00     | 0.00     | 0.00     | 0.00     | 0.00     | 0.00     | 0.00     | 0.00     | 0.00     | 0.00     | 0.00     | 0.00     | 0.00      | 0.00      | 0.00      |
| GT61       | 0.00     | 0.00     | 0.00     | 0.00     | 0.00     | 0.00     | 0.00     | 0.00     | 0.00     | 0.00     | 0.00     | 0.00     | 0.00     | 0.00      | 0.00      | 0.00      |
| GT3        | 0.06     | 0.10     | 0.17     | 0.07     | 0.09     | 0.07     | 0.15     | 0.15     | 0.29     | 0.07     | 0.06     | 0.13     | 0.15     | 0.09      | 0.26      | 0.09      |
| PL3        | 0.00     | 0.00     | 0.00     | 0.00     | 0.00     | 0.00     | 0.00     | 0.00     | 0.00     | 0.00     | 0.00     | 0.00     | 0.00     | 0.02      | 0.00      | 0.01      |
| GH108      | 0.02     | 0.00     | 0.04     | 0.03     | 0.00     | 0.00     | 0.02     | 0.02     | 0.05     | 0.04     | 0.01     | 0.03     | 0.01     | 0.00      | 0.03      | 0.03      |
| GT56       | 0.00     | 0.00     | 0.04     | 0.00     | 0.00     | 0.00     | 0.00     | 0.02     | 0.05     | 0.01     | 0.00     | 0.01     | 0.01     | 0.02      | 0.00      | 0.00      |
| PL11       | 0.00     | 0.19     | 0.14     | 0.09     | 0.07     | 0.14     | 0.11     | 0.08     | 0.00     | 0.15     | 0.17     | 0.18     | 0.17     | 0.09      | 0.06      | 0.11      |
| GH45       | 0.00     | 0.00     | 0.00     | 0.00     | 0.00     | 0.00     | 0.00     | 0.00     | 0.00     | 0.00     | 0.00     | 0.00     | 0.00     | 0.00      | 0.00      | 0.00      |
| GT34       | 0.00     | 0.00     | 0.00     | 0.00     | 0.00     | 0.00     | 0.00     | 0.00     | 0.00     | 0.00     | 0.00     | 0.00     | 0.00     | 0.00      | 0.00      | 0.00      |
| PL14       | 0.00     | 0.00     | 0.00     | 0.00     | 0.00     | 0.00     | 0.00     | 0.00     | 0.00     | 0.00     | 0.00     | 0.00     | 0.00     | 0.00      | 0.00      | 0.00      |
| GH19       | 0.00     | 0.00     | 0.02     | 0.00     | 0.02     | 0.00     | 0.00     | 0.02     | 0.00     | 0.00     | 0.01     | 0.01     | 0.00     | 0.00      | 0.00      | 0.00      |
| GH118      | 0.00     | 0.00     | 0.00     | 0.00     | 0.00     | 0.00     | 0.00     | 0.00     | 0.00     | 0.00     | 0.00     | 0.00     | 0.00     | 0.00      | 0.00      | 0.00      |
| GH82       | 0.00     | 0.00     | 0.00     | 0.00     | 0.00     | 0.00     | 0.00     | 0.00     | 0.00     | 0.00     | 0.00     | 0.00     | 0.00     | 0.00      | 0.00      | 0.00      |
| GH76       | 0.00     | 0.41     | 0.24     | 0.17     | 0.33     | 0.00     | 0.20     | 0.11     | 0.00     | 0.21     | 0.20     | 0.17     | 0.23     | 0.07      | 0.03      | 0.09      |
| GT4        | 1.17     | 2.16     | 1.75     | 1.21     | 1.37     | 1.70     | 1.43     | 2.06     | 0.93     | 1.48     | 1.43     | 1.24     | 1.50     | 1.58      | 1.34      | 1.33      |
| GT87       | 0.00     | 0.00     | 0.00     | 0.00     | 0.00     | 0.00     | 0.00     | 0.00     | 0.00     | 0.00     | 0.00     | 0.00     | 0.00     | 0.00      | 0.00      | 0.00      |
| GH24       | 0.09     | 0.15     | 0.26     | 0.17     | 0.22     | 0.28     | 0.12     | 0.38     | 0.49     | 0.18     | 0.15     | 0.23     | 0.09     | 0.20      | 0.29      | 0.15      |
| GH90       | 0.00     | 0.00     | 0.00     | 0.00     | 0.00     | 0.00     | 0.00     | 0.00     | 0.00     | 0.00     | 0.00     | 0.00     | 0.00     | 0.00      | 0.00      | 0.00      |
| GH57       | 0.05     | 0.19     | 0.14     | 0.09     | 0.13     | 0.07     | 0.10     | 0.15     | 0.15     | 0.09     | 0.04     | 0.06     | 0.10     | 0.16      | 0.14      | 0.10      |
| GH36       | 0.86     | 0.75     | 0.68     | 0.38     | 0.68     | 0.74     | 0.63     | 0.44     | 0.69     | 0.55     | 0.68     | 0.54     | 0.62     | 0.58      | 0.60      | 0.66      |
| GT46       | 0.00     | 0.00     | 0.00     | 0.00     | 0.00     | 0.00     | 0.00     | 0.00     | 0.00     | 0.00     | 0.00     | 0.00     | 0.00     | 0.00      | 0.00      | 0.00      |
| GH66       | 0.06     | 0.07     | 0.02     | 0.05     | 0.02     | 0.00     | 0.06     | 0.02     | 0.05     | 0.04     | 0.04     | 0.03     | 0.06     | 0.00      | 0.03      | 0.03      |

Normalized\_abundance\_2

| CAZY_group | CN-AD-87 | CN-AD-88 | CN-AD-89 | CN-AD-90 | CN-AD-91 | CN-AD-92 | CN-AD-93 | CN-AD-94 | CN-AD-95 | CN-AD-96 | CN-AD-97 | CN-AD-98 | CN-AD-99 | CN-AD-100 | CN-AD-101 | CN-AD-102 |
|------------|----------|----------|----------|----------|----------|----------|----------|----------|----------|----------|----------|----------|----------|-----------|-----------|-----------|
| GH48       | 0.00     | 0.00     | 0.00     | 0.00     | 0.00     | 0.00     | 0.00     | 0.01     | 0.02     | 0.00     | 0.00     | 0.00     | 0.00     | 0.00      | 0.00      | 0.01      |
| GT53       | 0.00     | 0.00     | 0.00     | 0.00     | 0.00     | 0.00     | 0.00     | 0.00     | 0.00     | 0.00     | 0.00     | 0.00     | 0.00     | 0.00      | 0.00      | 0.00      |
| GH60       | 0.00     | 0.00     | 0.00     | 0.00     | 0.00     | 0.00     | 0.00     | 0.00     | 0.00     | 0.00     | 0.00     | 0.00     | 0.00     | 0.00      | 0.00      | 0.00      |
| GT31       | 0.00     | 0.00     | 0.01     | 0.00     | 0.00     | 0.00     | 0.00     | 0.00     | 0.00     | 0.00     | 0.00     | 0.01     | 0.01     | 0.02      | 0.00      | 0.00      |
| GH105      | 0.16     | 0.85     | 0.48     | 0.39     | 0.44     | 0.64     | 0.52     | 0.21     | 0.10     | 0.58     | 0.63     | 0.60     | 0.60     | 0.29      | 0.23      | 0.42      |
| GT23       | 0.02     | 0.02     | 0.01     | 0.00     | 0.00     | 0.04     | 0.01     | 0.00     | 0.00     | 0.00     | 0.02     | 0.00     | 0.00     | 0.00      | 0.00      | 0.05      |
| GH11       | 0.00     | 0.00     | 0.00     | 0.00     | 0.00     | 0.00     | 0.00     | 0.00     | 0.00     | 0.00     | 0.01     | 0.00     | 0.00     | 0.00      | 0.00      | 0.00      |
| GT38       | 0.00     | 0.00     | 0.00     | 0.00     | 0.00     | 0.00     | 0.00     | 0.00     | 0.00     | 0.00     | 0.00     | 0.00     | 0.00     | 0.00      | 0.00      | 0.00      |
| GT43       | 0.00     | 0.00     | 0.00     | 0.00     | 0.00     | 0.00     | 0.00     | 0.00     | 0.00     | 0.00     | 0.00     | 0.00     | 0.00     | 0.00      | 0.00      | 0.00      |
| GH99       | 0.00     | 0.02     | 0.04     | 0.00     | 0.02     | 0.00     | 0.01     | 0.02     | 0.00     | 0.01     | 0.01     | 0.01     | 0.02     | 0.00      | 0.00      | 0.00      |
| GH38       | 0.17     | 0.12     | 0.15     | 0.12     | 0.11     | 0.18     | 0.18     | 0.25     | 0.20     | 0.18     | 0.14     | 0.17     | 0.21     | 0.07      | 0.06      | 0.20      |
| GH109      | 0.05     | 0.29     | 0.26     | 0.17     | 0.15     | 0.32     | 0.30     | 0.23     | 0.15     | 0.25     | 0.26     | 0.26     | 0.17     | 0.27      | 0.23      | 0.15      |
| GH2        | 2.42     | 4.46     | 3.92     | 2.85     | 3.27     | 3.33     | 3.84     | 3.05     | 1.72     | 4.28     | 3.77     | 3.32     | 4.10     | 2.77      | 1.80      | 2.96      |
| GT28       | 0.53     | 0.36     | 0.33     | 0.29     | 0.31     | 0.57     | 0.29     | 0.34     | 0.29     | 0.32     | 0.33     | 0.37     | 0.29     | 0.38      | 0.31      | 0.33      |
| GH42       | 0.41     | 0.24     | 0.15     | 0.14     | 0.22     | 0.21     | 0.15     | 0.08     | 0.00     | 0.18     | 0.14     | 0.19     | 0.16     | 0.02      | 0.09      | 0.14      |
| GT58       | 0.00     | 0.00     | 0.00     | 0.00     | 0.00     | 0.00     | 0.00     | 0.00     | 0.00     | 0.00     | 0.00     | 0.00     | 0.00     | 0.00      | 0.00      | 0.00      |
| GH61       | 0.00     | 0.00     | 0.00     | 0.00     | 0.00     | 0.00     | 0.00     | 0.00     | 0.00     | 0.00     | 0.00     | 0.00     | 0.00     | 0.00      | 0.00      | 0.00      |
| GH80       | 0.00     | 0.00     | 0.00     | 0.00     | 0.00     | 0.00     | 0.00     | 0.00     | 0.00     | 0.00     | 0.00     | 0.00     | 0.00     | 0.00      | 0.00      | 0.00      |
| GH98       | 0.00     | 0.00     | 0.00     | 0.00     | 0.00     | 0.00     | 0.01     | 0.04     | 0.00     | 0.00     | 0.00     | 0.00     | 0.00     | 0.00      | 0.00      | 0.00      |
| GH6        | 0.00     | 0.00     | 0.00     | 0.00     | 0.00     | 0.00     | 0.00     | 0.00     | 0.00     | 0.00     | 0.01     | 0.00     | 0.00     | 0.00      | 0.00      | 0.00      |
| GT1        | 0.06     | 0.00     | 0.02     | 0.00     | 0.02     | 0.04     | 0.03     | 0.04     | 0.05     | 0.01     | 0.04     | 0.03     | 0.02     | 0.02      | 0.00      | 0.03      |
| GH28       | 0.47     | 1.36     | 0.88     | 0.58     | 0.62     | 0.78     | 0.63     | 0.71     | 0.74     | 0.75     | 0.86     | 0.85     | 0.94     | 0.58      | 0.51      | 0.62      |
| GT42       | 0.00     | 0.00     | 0.00     | 0.00     | 0.00     | 0.00     | 0.00     | 0.00     | 0.00     | 0.00     | 0.00     | 0.00     | 0.00     | 0.00      | 0.00      | 0.00      |
| GH128      | 0.00     | 0.00     | 0.00     | 0.00     | 0.00     | 0.00     | 0.00     | 0.00     | 0.00     | 0.00     | 0.00     | 0.00     | 0.00     | 0.00      | 0.00      | 0.00      |
| CE12       | 0.12     | 0.19     | 0.10     | 0.10     | 0.09     | 0.14     | 0.08     | 0.04     | 0.10     | 0.16     | 0.14     | 0.09     | 0.19     | 0.04      | 0.14      | 0.06      |
| CE16       | 0.00     | 0.00     | 0.00     | 0.00     | 0.00     | 0.00     | 0.00     | 0.00     | 0.00     | 0.00     | 0.00     | 0.00     | 0.00     | 0.00      | 0.00      | 0.00      |
| GT89       | 0.00     | 0.00     | 0.00     | 0.00     | 0.00     | 0.00     | 0.00     | 0.00     | 0.00     | 0.00     | 0.00     | 0.00     | 0.00     | 0.00      | 0.00      | 0.00      |
| GT11       | 0.05     | 0.05     | 0.08     | 0.05     | 0.15     | 0.14     | 0.08     | 0.11     | 0.05     | 0.03     | 0.02     | 0.04     | 0.02     | 0.04      | 0.00      | 0.05      |
| GT77       | 0.00     | 0.00     | 0.01     | 0.00     | 0.00     | 0.04     | 0.01     | 0.04     | 0.00     | 0.00     | 0.01     | 0.01     | 0.03     | 0.04      | 0.06      | 0.00      |
| GT55       | 0.00     | 0.00     | 0.00     | 0.00     | 0.00     | 0.00     | 0.00     | 0.00     | 0.00     | 0.00     | 0.00     | 0.00     | 0.00     | 0.00      | 0.00      | 0.00      |
| GT18       | 0.00     | 0.00     | 0.00     | 0.00     | 0.00     | 0.00     | 0.00     | 0.00     | 0.00     | 0.00     | 0.00     | 0.00     | 0.00     | 0.00      | 0.00      | 0.00      |
| GH87       | 0.02     | 0.00     | 0.00     | 0.00     | 0.00     | 0.00     | 0.00     | 0.00     | 0.00     | 0.00     | 0.00     | 0.01     | 0.00     | 0.00      | 0.00      | 0.00      |
| PL5        | 0.00     | 0.00     | 0.00     | 0.00     | 0.00     | 0.00     | 0.00     | 0.00     | 0.00     | 0.00     | 0.00     | 0.00     | 0.00     | 0.00      | 0.00      | 0.00      |
| GH22       | 0.00     | 0.00     | 0.00     | 0.02     | 0.00     | 0.00     | 0.00     | 0.00     | 0.00     | 0.00     | 0.00     | 0.00     | 0.00     | 0.00      | 0.00      | 0.00      |
| CE2        | 0.03     | 0.12     | 0.06     | 0.00     | 0.00     | 0.14     | 0.03     | 0.06     | 0.00     | 0.06     | 0.07     | 0.08     | 0.04     | 0.02      | 0.06      | 0.07      |
| GH120      | 0.11     | 0.05     | 0.01     | 0.02     | 0.00     | 0.07     | 0.02     | 0.06     | 0.00     | 0.03     | 0.04     | 0.01     | 0.05     | 0.00      | 0.00      | 0.06      |
| GH73       | 0.52     | 0.39     | 0.40     | 0.31     | 0.40     | 0.35     | 0.30     | 0.34     | 0.44     | 0.37     | 0.28     | 0.32     | 0.33     | 0.47      | 0.40      | 0.36      |
| GT17       | 0.00     | 0.00     | 0.00     | 0.00     | 0.00     | 0.00     | 0.00     | 0.00     | 0.00     | 0.00     | 0.00     | 0.00     | 0.00     | 0.00      | 0.00      | 0.00      |
| GH124      | 0.00     | 0.00     | 0.00     | 0.00     | 0.00     | 0.00     | 0.00     | 0.00     | 0.00     | 0.00     | 0.00     | 0.00     | 0.00     | 0.00      | 0.00      | 0.00      |
| GH54       | 0.00     | 0.00     | 0.00     | 0.00     | 0.00     | 0.00     | 0.00     | 0.00     | 0.00     | 0.00     | 0.00     | 0.00     | 0.00     | 0.00      | 0.00      | 0.00      |
| GH100      | 0.00     | 0.00     | 0.00     | 0.00     | 0.00     | 0.00     | 0.00     | 0.00     | 0.00     | 0.00     | 0.00     | 0.00     | 0.00     | 0.00      | 0.00      | 0.00      |
| GH113      | 0.03     | 0.05     | 0.00     | 0.00     | 0.00     | 0.14     | 0.01     | 0.02     | 0.00     | 0.01     | 0.03     | 0.06     | 0.01     | 0.00      | 0.03      | 0.05      |
| GT5        | 0.61     | 0.27     | 0.27     | 0.32     | 0.42     | 0.35     | 0.29     | 0.36     | 0.29     | 0.24     | 0.38     | 0.38     | 0.20     | 0.18      | 0.37      | 0.36      |
| GH94       | 0.94     | 0.29     | 0.16     | 0.10     | 0.33     | 0.46     | 0.33     | 0.34     | 0.15     | 0.12     | 0.47     | 0.53     | 0.15     | 0.07      | 0.49      | 0.44      |
| GT66       | 0.00     | 0.00     | 0.00     | 0.00     | 0.00     | 0.00     | 0.00     | 0.00     | 0.00     | 0.00     | 0.00     | 0.00     | 0.00     | 0.00      | 0.00      | 0.01      |
| GT94       | 0.00     | 0.00     | 0.00     | 0.00     | 0.00     | 0.00     | 0.00     | 0.00     | 0.00     | 0.00     | 0.00     | 0.00     | 0.00     | 0.00      | 0.00      | 0.00      |
| GH58       | 0.00     | 0.00     | 0.00     | 0.00     | 0.00     | 0.00     | 0.00     | 0.00     | 0.00     | 0.00     | 0.00     | 0.00     | 0.00     | 0.00      | 0.00      | 0.00      |
| GH1        | 1.30     | 0.56     | 0.36     | 0.15     | 0.24     | 0.43     | 0.20     | 0.21     | 0.20     | 0.28     | 0.35     | 0.54     | 0.39     | 0.16      | 0.40      | 0.39      |
| PL22       | 0.00     | 0.00     | 0.01     | 0.00     | 0.00     | 0.00     | 0.00     | 0.00     | 0.00     | 0.00     | 0.00     | 0.00     | 0.00     | 0.00      | 0.00      | 0.00      |
| GT9        | 0.19     | 0.17     | 0.27     | 0.20     | 0.11     | 0.11     | 0.06     | 0.21     | 0.29     | 0.19     | 0.06     | 0.13     | 0.24     | 0.35      | 0.14      | 0.07      |

## Normalized\_abundance\_2

| CAZY_group | CN-AD-87 | CN-AD-88 | CN-AD-89 | CN-AD-90 | CN-AD-91 | CN-AD-92 | CN-AD-93 | CN-AD-94 | CN-AD-95 | CN-AD-96 | CN-AD-97 | CN-AD-98 | CN-AD-99 | CN-AD-100 | CN-AD-101 | CN-AD-102 |
|------------|----------|----------|----------|----------|----------|----------|----------|----------|----------|----------|----------|----------|----------|-----------|-----------|-----------|
| GT76       | 0.00     | 0.00     | 0.00     | 0.00     | 0.00     | 0.00     | 0.00     | 0.00     | 0.00     | 0.00     | 0.00     | 0.00     | 0.00     | 0.00      | 0.00      | 0.00      |
| GT32       | 0.11     | 0.10     | 0.10     | 0.05     | 0.07     | 0.04     | 0.08     | 0.06     | 0.05     | 0.01     | 0.05     | 0.06     | 0.06     | 0.13      | 0.06      | 0.07      |
| GT47       | 0.06     | 0.05     | 0.02     | 0.03     | 0.00     | 0.07     | 0.00     | 0.06     | 0.05     | 0.00     | 0.00     | 0.01     | 0.02     | 0.00      | 0.03      | 0.01      |
| GH84       | 0.12     | 0.10     | 0.14     | 0.10     | 0.07     | 0.14     | 0.12     | 0.15     | 0.05     | 0.15     | 0.13     | 0.10     | 0.14     | 0.20      | 0.14      | 0.07      |
| GH83       | 0.00     | 0.00     | 0.00     | 0.00     | 0.00     | 0.00     | 0.00     | 0.00     | 0.00     | 0.00     | 0.00     | 0.00     | 0.00     | 0.00      | 0.00      | 0.00      |
| GT59       | 0.00     | 0.00     | 0.00     | 0.00     | 0.00     | 0.00     | 0.00     | 0.00     | 0.00     | 0.00     | 0.00     | 0.00     | 0.00     | 0.00      | 0.00      | 0.00      |
| GH34       | 0.00     | 0.00     | 0.00     | 0.00     | 0.00     | 0.00     | 0.00     | 0.00     | 0.00     | 0.00     | 0.00     | 0.00     | 0.00     | 0.00      | 0.00      | 0.00      |
| GT14       | 0.00     | 0.10     | 0.01     | 0.00     | 0.02     | 0.00     | 0.02     | 0.08     | 0.00     | 0.01     | 0.02     | 0.03     | 0.03     | 0.02      | 0.00      | 0.02      |
| GH47       | 0.00     | 0.00     | 0.00     | 0.00     | 0.00     | 0.00     | 0.00     | 0.02     | 0.00     | 0.00     | 0.00     | 0.00     | 0.00     | 0.02      | 0.00      | 0.00      |
| GH97       | 0.23     | 1.38     | 1.11     | 0.68     | 0.53     | 0.57     | 0.93     | 0.82     | 0.74     | 0.90     | 0.64     | 0.49     | 0.93     | 0.67      | 0.94      | 0.51      |
| GH50       | 0.00     | 0.12     | 0.05     | 0.09     | 0.07     | 0.00     | 0.02     | 0.00     | 0.00     | 0.06     | 0.03     | 0.06     | 0.06     | 0.00      | 0.00      | 0.06      |
| GT26       | 0.22     | 0.17     | 0.18     | 0.17     | 0.27     | 0.25     | 0.11     | 0.27     | 0.29     | 0.09     | 0.13     | 0.08     | 0.16     | 0.22      | 0.17      | 0.18      |
| GH18       | 0.36     | 0.87     | 0.54     | 0.38     | 0.55     | 0.21     | 0.35     | 0.46     | 0.10     | 0.46     | 0.60     | 0.33     | 0.55     | 0.24      | 0.23      | 0.65      |
| GH37       | 0.00     | 0.00     | 0.04     | 0.00     | 0.00     | 0.00     | 0.00     | 0.04     | 0.05     | 0.03     | 0.00     | 0.03     | 0.04     | 0.07      | 0.00      | 0.00      |
| PL13       | 0.00     | 0.12     | 0.07     | 0.02     | 0.02     | 0.00     | 0.02     | 0.00     | 0.00     | 0.07     | 0.04     | 0.01     | 0.07     | 0.00      | 0.00      | 0.06      |
| GH27       | 0.20     | 0.27     | 0.16     | 0.07     | 0.09     | 0.11     | 0.19     | 0.25     | 0.10     | 0.16     | 0.24     | 0.17     | 0.15     | 0.09      | 0.14      | 0.19      |
| GT54       | 0.00     | 0.00     | 0.00     | 0.00     | 0.00     | 0.00     | 0.00     | 0.00     | 0.00     | 0.00     | 0.00     | 0.00     | 0.00     | 0.00      | 0.00      | 0.00      |
| GT91       | 0.00     | 0.00     | 0.00     | 0.00     | 0.00     | 0.00     | 0.00     | 0.00     | 0.00     | 0.00     | 0.00     | 0.00     | 0.00     | 0.00      | 0.00      | 0.00      |
| GT72       | 0.00     | 0.00     | 0.00     | 0.00     | 0.00     | 0.00     | 0.00     | 0.00     | 0.00     | 0.00     | 0.00     | 0.00     | 0.00     | 0.00      | 0.00      | 0.00      |
| GH67       | 0.05     | 0.15     | 0.11     | 0.03     | 0.07     | 0.04     | 0.03     | 0.11     | 0.10     | 0.06     | 0.06     | 0.09     | 0.11     | 0.09      | 0.09      | 0.08      |
| GH12       | 0.00     | 0.00     | 0.00     | 0.00     | 0.00     | 0.00     | 0.00     | 0.00     | 0.00     | 0.00     | 0.00     | 0.00     | 0.00     | 0.00      | 0.00      | 0.00      |
| GH91       | 0.00     | 0.07     | 0.02     | 0.05     | 0.00     | 0.00     | 0.03     | 0.00     | 0.00     | 0.04     | 0.00     | 0.00     | 0.01     | 0.02      | 0.00      | 0.03      |
| GT69       | 0.00     | 0.00     | 0.00     | 0.00     | 0.00     | 0.00     | 0.00     | 0.00     | 0.00     | 0.00     | 0.00     | 0.00     | 0.00     | 0.00      | 0.00      | 0.00      |
| GH106      | 0.08     | 0.39     | 0.25     | 0.09     | 0.15     | 0.14     | 0.21     | 0.08     | 0.25     | 0.30     | 0.28     | 0.26     | 0.31     | 0.24      | 0.09      | 0.18      |
| GT62       | 0.00     | 0.00     | 0.00     | 0.00     | 0.00     | 0.00     | 0.00     | 0.00     | 0.00     | 0.00     | 0.00     | 0.00     | 0.00     | 0.00      | 0.00      | 0.00      |
| GH17       | 0.00     | 0.00     | 0.00     | 0.00     | 0.00     | 0.00     | 0.00     | 0.00     | 0.00     | 0.00     | 0.00     | 0.00     | 0.00     | 0.00      | 0.00      | 0.00      |
| GH88       | 0.05     | 0.48     | 0.45     | 0.31     | 0.20     | 0.25     | 0.33     | 0.23     | 0.05     | 0.43     | 0.38     | 0.24     | 0.51     | 0.18      | 0.09      | 0.29      |
| CE5        | 0.00     | 0.00     | 0.00     | 0.00     | 0.00     | 0.00     | 0.00     | 0.00     | 0.00     | 0.00     | 0.00     | 0.00     | 0.00     | 0.00      | 0.00      | 0.00      |
| GT8        | 0.20     | 0.17     | 0.06     | 0.14     | 0.18     | 0.11     | 0.09     | 0.11     | 0.10     | 0.07     | 0.07     | 0.04     | 0.03     | 0.09      | 0.00      | 0.06      |
| GT50       | 0.00     | 0.00     | 0.00     | 0.00     | 0.00     | 0.00     | 0.00     | 0.00     | 0.00     | 0.00     | 0.00     | 0.00     | 0.00     | 0.00      | 0.00      | 0.00      |
| GT20       | 0.00     | 0.10     | 0.14     | 0.10     | 0.13     | 0.04     | 0.08     | 0.06     | 0.00     | 0.07     | 0.03     | 0.06     | 0.11     | 0.09      | 0.00      | 0.02      |
| PL9        | 0.11     | 0.22     | 0.08     | 0.12     | 0.04     | 0.04     | 0.04     | 0.06     | 0.00     | 0.09     | 0.13     | 0.13     | 0.05     | 0.09      | 0.14      | 0.10      |
| GH55       | 0.06     | 0.00     | 0.03     | 0.05     | 0.00     | 0.07     | 0.02     | 0.08     | 0.00     | 0.01     | 0.01     | 0.05     | 0.03     | 0.00      | 0.00      | 0.01      |
| GH64       | 0.00     | 0.00     | 0.01     | 0.00     | 0.00     | 0.00     | 0.00     | 0.00     | 0.00     | 0.00     | 0.00     | 0.00     | 0.00     | 0.00      | 0.00      | 0.00      |
| GH127      | 0.25     | 0.24     | 0.26     | 0.27     | 0.11     | 0.25     | 0.20     | 0.23     | 0.34     | 0.31     | 0.31     | 0.22     | 0.42     | 0.38      | 0.26      | 0.20      |
| GH103      | 0.03     | 0.00     | 0.03     | 0.00     | 0.00     | 0.00     | 0.00     | 0.04     | 0.00     | 0.00     | 0.00     | 0.03     | 0.03     | 0.04      | 0.00      | 0.00      |
| GH3        | 1.94     | 2.28     | 2.14     | 2.03     | 2.19     | 2.06     | 2.47     | 2.18     | 1.03     | 2.66     | 2.01     | 2.23     | 2.36     | 1.97      | 1.29      | 2.08      |
| GT45       | 0.00     | 0.00     | 0.00     | 0.00     | 0.00     | 0.00     | 0.00     | 0.00     | 0.00     | 0.00     | 0.00     | 0.00     | 0.00     | 0.00      | 0.00      | 0.00      |
| GT74       | 0.00     | 0.00     | 0.00     | 0.00     | 0.00     | 0.00     | 0.00     | 0.00     | 0.00     | 0.00     | 0.00     | 0.00     | 0.00     | 0.00      | 0.00      | 0.00      |
| GT90       | 0.00     | 0.00     | 0.00     | 0.00     | 0.00     | 0.00     | 0.00     | 0.00     | 0.00     | 0.00     | 0.00     | 0.00     | 0.00     | 0.00      | 0.00      | 0.00      |
| GH116      | 0.00     | 0.15     | 0.08     | 0.09     | 0.09     | 0.00     | 0.11     | 0.04     | 0.00     | 0.07     | 0.03     | 0.05     | 0.05     | 0.02      | 0.00      | 0.09      |
| GH31       | 0.66     | 1.09     | 1.00     | 0.72     | 0.86     | 0.92     | 1.13     | 0.71     | 0.59     | 0.97     | 0.90     | 0.95     | 0.94     | 0.78      | 0.54      | 0.64      |
| GT12       | 0.00     | 0.00     | 0.00     | 0.00     | 0.00     | 0.00     | 0.00     | 0.00     | 0.00     | 0.00     | 0.00     | 0.00     | 0.00     | 0.00      | 0.00      | 0.00      |
| CE1        | 0.28     | 0.44     | 0.39     | 0.29     | 0.27     | 0.32     | 0.26     | 0.36     | 0.15     | 0.37     | 0.26     | 0.31     | 0.36     | 0.38      | 0.09      | 0.26      |
| GH121      | 0.00     | 0.00     | 0.00     | 0.00     | 0.00     | 0.00     | 0.00     | 0.00     | 0.00     | 0.00     | 0.00     | 0.00     | 0.00     | 0.00      | 0.00      | 0.00      |
| GH79       | 0.00     | 0.00     | 0.00     | 0.00     | 0.00     | 0.00     | 0.00     | 0.00     | 0.00     | 0.00     | 0.01     | 0.00     | 0.01     | 0.00      | 0.00      | 0.02      |
| GT73       | 0.00     | 0.00     | 0.01     | 0.00     | 0.00     | 0.00     | 0.00     | 0.02     | 0.00     | 0.00     | 0.00     | 0.00     | 0.00     | 0.00      | 0.00      | 0.00      |
| GH77       | 0.69     | 0.53     | 0.45     | 0.43     | 0.38     | 0.50     | 0.48     | 0.38     | 0.20     | 0.35     | 0.50     | 0.54     | 0.44     | 0.33      | 0.49      | 0.44      |
| PL17       | 0.00     | 0.02     | 0.02     | 0.02     | 0.02     | 0.00     | 0.00     | 0.02     | 0.05     | 0.00     | 0.02     | 0.00     | 0.01     | 0.02      | 0.03      | 0.00      |
| PL8        | 0.00     | 0.48     | 0.41     | 0.20     | 0.24     | 0.00     | 0.31     | 0.17     | 0.00     | 0.44     | 0.24     | 0.13     | 0.42     | 0.22      | 0.20      | 0.20      |

## Normalized\_abundance\_2

| CAZY_group | CN-AD-87 | CN-AD-88 | CN-AD-89 | CN-AD-90 | CN-AD-91 | CN-AD-92 | CN-AD-93 | CN-AD-94 | CN-AD-95 | CN-AD-96 | CN-AD-97 | CN-AD-98 | CN-AD-99 | CN-AD-100 | CN-AD-101 | CN-AD-102 |
|------------|----------|----------|----------|----------|----------|----------|----------|----------|----------|----------|----------|----------|----------|-----------|-----------|-----------|
| CE9        | 0.28     | 0.44     | 0.35     | 0.20     | 0.38     | 0.39     | 0.27     | 0.23     | 0.20     | 0.25     | 0.25     | 0.37     | 0.29     | 0.38      | 0.14      | 0.26      |
| CE15       | 0.00     | 0.00     | 0.00     | 0.02     | 0.00     | 0.00     | 0.01     | 0.00     | 0.00     | 0.00     | 0.01     | 0.00     | 0.00     | 0.00      | 0.00      | 0.00      |
| GT79       | 0.00     | 0.00     | 0.00     | 0.00     | 0.00     | 0.00     | 0.00     | 0.00     | 0.00     | 0.00     | 0.00     | 0.00     | 0.00     | 0.00      | 0.00      | 0.00      |
| GT10       | 0.00     | 0.00     | 0.00     | 0.02     | 0.02     | 0.00     | 0.02     | 0.00     | 0.00     | 0.00     | 0.01     | 0.00     | 0.00     | 0.02      | 0.00      | 0.00      |
| GH119      | 0.00     | 0.00     | 0.00     | 0.00     | 0.00     | 0.00     | 0.00     | 0.00     | 0.00     | 0.00     | 0.00     | 0.00     | 0.00     | 0.00      | 0.00      | 0.00      |
| GH16       | 0.09     | 0.22     | 0.21     | 0.10     | 0.20     | 0.11     | 0.25     | 0.13     | 0.15     | 0.19     | 0.17     | 0.15     | 0.16     | 0.13      | 0.14      | 0.14      |
| GH43       | 1.17     | 2.62     | 2.62     | 1.35     | 1.75     | 1.28     | 1.97     | 1.81     | 1.37     | 2.10     | 1.84     | 1.69     | 2.05     | 1.64      | 1.23      | 1.27      |
| GH51       | 0.64     | 0.44     | 0.54     | 0.31     | 0.38     | 0.53     | 0.53     | 0.50     | 0.74     | 0.52     | 0.61     | 0.45     | 0.51     | 0.44      | 0.31      | 0.41      |
| GT35       | 1.16     | 0.73     | 0.62     | 0.56     | 0.75     | 0.78     | 0.52     | 0.69     | 0.59     | 0.44     | 0.76     | 0.86     | 0.49     | 0.53      | 0.83      | 0.75      |
| GT25       | 0.08     | 0.02     | 0.00     | 0.03     | 0.00     | 0.00     | 0.00     | 0.00     | 0.00     | 0.01     | 0.00     | 0.01     | 0.00     | 0.00      | 0.00      | 0.00      |
| GT2        | 3.72     | 5.07     | 3.75     | 2.99     | 3.36     | 4.43     | 3.49     | 3.82     | 2.79     | 3.33     | 3.33     | 3.52     | 3.51     | 2.75      | 3.46      | 3.49      |
| GT51       | 0.86     | 0.95     | 1.02     | 0.80     | 0.71     | 0.89     | 0.67     | 0.86     | 0.69     | 0.78     | 0.69     | 0.86     | 0.75     | 0.98      | 0.91      | 0.55      |
| GH107      | 0.00     | 0.00     | 0.00     | 0.00     | 0.00     | 0.00     | 0.00     | 0.00     | 0.00     | 0.00     | 0.00     | 0.00     | 0.00     | 0.00      | 0.00      | 0.00      |
| GH7        | 0.00     | 0.00     | 0.00     | 0.00     | 0.00     | 0.00     | 0.00     | 0.00     | 0.00     | 0.00     | 0.00     | 0.00     | 0.00     | 0.00      | 0.00      | 0.00      |
| GT7        | 0.00     | 0.00     | 0.00     | 0.00     | 0.00     | 0.00     | 0.00     | 0.00     | 0.00     | 0.00     | 0.00     | 0.00     | 0.00     | 0.00      | 0.00      | 0.00      |
| GT36       | 0.00     | 0.00     | 0.00     | 0.00     | 0.00     | 0.00     | 0.00     | 0.00     | 0.00     | 0.00     | 0.00     | 0.00     | 0.00     | 0.00      | 0.00      | 0.00      |
| PL7        | 0.00     | 0.00     | 0.00     | 0.00     | 0.00     | 0.00     | 0.00     | 0.00     | 0.00     | 0.00     | 0.00     | 0.00     | 0.00     | 0.00      | 0.00      | 0.00      |
| GH110      | 0.03     | 0.10     | 0.16     | 0.09     | 0.13     | 0.04     | 0.19     | 0.15     | 0.05     | 0.18     | 0.12     | 0.05     | 0.10     | 0.13      | 0.11      | 0.06      |
| GT21       | 0.00     | 0.00     | 0.00     | 0.00     | 0.00     | 0.00     | 0.00     | 0.00     | 0.00     | 0.00     | 0.00     | 0.00     | 0.00     | 0.00      | 0.00      | 0.00      |
| GH62       | 0.00     | 0.00     | 0.00     | 0.00     | 0.00     | 0.00     | 0.00     | 0.00     | 0.00     | 0.00     | 0.00     | 0.00     | 0.00     | 0.00      | 0.00      | 0.00      |
| GH125      | 0.08     | 0.24     | 0.17     | 0.26     | 0.07     | 0.07     | 0.16     | 0.15     | 0.05     | 0.12     | 0.11     | 0.12     | 0.14     | 0.11      | 0.09      | 0.14      |
| GH117      | 0.00     | 0.15     | 0.11     | 0.09     | 0.09     | 0.04     | 0.12     | 0.13     | 0.00     | 0.16     | 0.09     | 0.04     | 0.11     | 0.11      | 0.03      | 0.07      |
| GH68       | 0.03     | 0.00     | 0.00     | 0.00     | 0.00     | 0.00     | 0.00     | 0.00     | 0.00     | 0.00     | 0.00     | 0.00     | 0.00     | 0.00      | 0.00      | 0.00      |
| GH85       | 0.05     | 0.00     | 0.00     | 0.00     | 0.00     | 0.14     | 0.00     | 0.00     | 0.10     | 0.00     | 0.02     | 0.00     | 0.01     | 0.00      | 0.03      | 0.00      |
| GH92       | 0.11     | 2.42     | 1.73     | 1.35     | 1.10     | 0.60     | 1.61     | 0.80     | 0.44     | 1.45     | 1.39     | 1.08     | 1.58     | 1.69      | 0.91      | 1.33      |
| GH40       | 0.00     | 0.00     | 0.00     | 0.00     | 0.00     | 0.00     | 0.00     | 0.00     | 0.00     | 0.00     | 0.00     | 0.00     | 0.00     | 0.00      | 0.00      | 0.00      |
| GT49       | 0.00     | 0.00     | 0.00     | 0.00     | 0.00     | 0.00     | 0.00     | 0.00     | 0.00     | 0.00     | 0.00     | 0.00     | 0.00     | 0.00      | 0.00      | 0.00      |
| GH112      | 0.23     | 0.15     | 0.09     | 0.07     | 0.18     | 0.21     | 0.13     | 0.15     | 0.15     | 0.12     | 0.11     | 0.18     | 0.18     | 0.04      | 0.11      | 0.15      |
| GT67       | 0.00     | 0.00     | 0.00     | 0.00     | 0.00     | 0.00     | 0.00     | 0.00     | 0.00     | 0.00     | 0.00     | 0.00     | 0.00     | 0.00      | 0.00      | 0.00      |
| CE8        | 0.16     | 0.41     | 0.22     | 0.15     | 0.20     | 0.25     | 0.20     | 0.21     | 0.29     | 0.22     | 0.27     | 0.26     | 0.16     | 0.16      | 0.17      | 0.16      |
| GT86       | 0.00     | 0.00     | 0.00     | 0.00     | 0.00     | 0.00     | 0.00     | 0.00     | 0.00     | 0.00     | 0.00     | 0.00     | 0.00     | 0.00      | 0.00      | 0.00      |
| GH101      | 0.02     | 0.00     | 0.00     | 0.00     | 0.02     | 0.00     | 0.00     | 0.02     | 0.00     | 0.04     | 0.00     | 0.00     | 0.02     | 0.00      | 0.00      | 0.01      |
| GH81       | 0.00     | 0.00     | 0.00     | 0.00     | 0.00     | 0.00     | 0.00     | 0.00     | 0.00     | 0.00     | 0.00     | 0.00     | 0.00     | 0.00      | 0.00      | 0.00      |
| GT93       | 0.00     | 0.00     | 0.00     | 0.00     | 0.00     | 0.00     | 0.00     | 0.00     | 0.00     | 0.00     | 0.00     | 0.00     | 0.00     | 0.00      | 0.00      | 0.00      |
| GT63       | 0.00     | 0.00     | 0.00     | 0.00     | 0.00     | 0.00     | 0.00     | 0.00     | 0.00     | 0.00     | 0.00     | 0.00     | 0.00     | 0.00      | 0.00      | 0.00      |
| CE11       | 0.17     | 0.34     | 0.26     | 0.26     | 0.13     | 0.28     | 0.25     | 0.15     | 0.20     | 0.24     | 0.18     | 0.18     | 0.25     | 0.29      | 0.20      | 0.16      |
| GT19       | 0.11     | 0.17     | 0.23     | 0.15     | 0.07     | 0.14     | 0.10     | 0.17     | 0.10     | 0.12     | 0.05     | 0.10     | 0.17     | 0.18      | 0.23      | 0.07      |
| GT33       | 0.00     | 0.00     | 0.00     | 0.00     | 0.00     | 0.00     | 0.00     | 0.00     | 0.00     | 0.00     | 0.00     | 0.00     | 0.00     | 0.00      | 0.00      | 0.00      |
| GH21       | 0.00     | 0.00     | 0.00     | 0.00     | 0.00     | 0.00     | 0.00     | 0.00     | 0.00     | 0.00     | 0.00     | 0.00     | 0.00     | 0.00      | 0.00      | 0.00      |
| GT68       | 0.00     | 0.00     | 0.00     | 0.00     | 0.00     | 0.00     | 0.00     | 0.00     | 0.00     | 0.00     | 0.00     | 0.00     | 0.00     | 0.00      | 0.00      | 0.00      |
| GH89       | 0.02     | 0.36     | 0.24     | 0.12     | 0.24     | 0.07     | 0.22     | 0.11     | 0.10     | 0.27     | 0.24     | 0.19     | 0.23     | 0.13      | 0.11      | 0.17      |
| GT82       | 0.00     | 0.00     | 0.00     | 0.00     | 0.00     | 0.00     | 0.00     | 0.00     | 0.00     | 0.00     | 0.00     | 0.00     | 0.00     | 0.00      | 0.00      | 0.00      |
| GH30       | 0.08     | 0.32     | 0.23     | 0.17     | 0.15     | 0.18     | 0.25     | 0.17     | 0.15     | 0.28     | 0.20     | 0.21     | 0.22     | 0.16      | 0.09      | 0.15      |
| GH20       | 0.19     | 1.53     | 1.10     | 0.94     | 0.80     | 0.99     | 1.32     | 0.69     | 0.69     | 1.21     | 0.88     | 0.65     | 1.03     | 0.91      | 0.40      | 0.87      |
| GH52       | 0.00     | 0.00     | 0.00     | 0.00     | 0.00     | 0.00     | 0.00     | 0.00     | 0.00     | 0.00     | 0.00     | 0.00     | 0.00     | 0.00      | 0.00      | 0.00      |
| GT84       | 0.03     | 0.00     | 0.00     | 0.00     | 0.02     | 0.00     | 0.00     | 0.00     | 0.00     | 0.00     | 0.00     | 0.00     | 0.00     | 0.00      | 0.00      | 0.08      |
| GT15       | 0.00     | 0.00     | 0.00     | 0.00     | 0.00     | 0.00     | 0.00     | 0.00     | 0.00     | 0.00     | 0.00     | 0.00     | 0.00     | 0.00      | 0.00      | 0.00      |
| GH93       | 0.00     | 0.00     | 0.02     | 0.00     | 0.00     | 0.00     | 0.01     | 0.02     | 0.00     | 0.01     | 0.00     | 0.00     | 0.01     | 0.00      | 0.00      | 0.00      |
| PL16       | 0.00     | 0.00     | 0.00     | 0.00     | 0.00     | 0.00     | 0.00     | 0.00     | 0.00     | 0.00     | 0.00     | 0.00     | 0.00     | 0.00      | 0.00      | 0.00      |
| GH26       | 0.11     | 0.05     | 0.02     | 0.05     | 0.02     | 0.04     | 0.12     | 0.21     | 0.15     | 0.04     | 0.11     | 0.13     | 0.08     | 0.04      | 0.00      | 0.14      |

## Normalized\_abundance\_2

| CAZY_group | CN-AD-87 | CN-AD-88 | CN-AD-89 | CN-AD-90 | CN-AD-91 | CN-AD-92 | CN-AD-93 | CN-AD-94 | CN-AD-95 | CN-AD-96 | CN-AD-97 | CN-AD-98 | CN-AD-99 | CN-AD-100 | CN-AD-101 | CN-AD-102 |
|------------|----------|----------|----------|----------|----------|----------|----------|----------|----------|----------|----------|----------|----------|-----------|-----------|-----------|
| GT75       | 0.00     | 0.00     | 0.00     | 0.00     | 0.00     | 0.00     | 0.00     | 0.00     | 0.00     | 0.00     | 0.00     | 0.00     | 0.00     | 0.00      | 0.00      | 0.00      |
| GH53       | 0.20     | 0.12     | 0.09     | 0.02     | 0.04     | 0.18     | 0.06     | 0.08     | 0.15     | 0.04     | 0.19     | 0.12     | 0.09     | 0.02      | 0.03      | 0.24      |
| GT88       | 0.00     | 0.00     | 0.00     | 0.00     | 0.00     | 0.00     | 0.00     | 0.00     | 0.00     | 0.00     | 0.00     | 0.00     | 0.00     | 0.00      | 0.00      | 0.00      |
| GT24       | 0.00     | 0.00     | 0.00     | 0.00     | 0.00     | 0.00     | 0.00     | 0.00     | 0.00     | 0.00     | 0.00     | 0.00     | 0.00     | 0.00      | 0.00      | 0.00      |
| GT81       | 0.00     | 0.00     | 0.00     | 0.00     | 0.00     | 0.00     | 0.00     | 0.00     | 0.00     | 0.00     | 0.00     | 0.00     | 0.00     | 0.00      | 0.00      | 0.00      |
| GH4        | 0.14     | 0.10     | 0.25     | 0.09     | 0.13     | 0.04     | 0.01     | 0.08     | 0.10     | 0.06     | 0.09     | 0.14     | 0.10     | 0.13      | 0.03      | 0.09      |
| GT78       | 0.00     | 0.00     | 0.00     | 0.00     | 0.00     | 0.00     | 0.00     | 0.00     | 0.00     | 0.00     | 0.00     | 0.00     | 0.00     | 0.00      | 0.00      | 0.00      |
| GH8        | 0.03     | 0.02     | 0.09     | 0.02     | 0.00     | 0.04     | 0.04     | 0.08     | 0.05     | 0.09     | 0.05     | 0.04     | 0.05     | 0.11      | 0.09      | 0.03      |
| GH70       | 0.28     | 0.00     | 0.00     | 0.00     | 0.00     | 0.00     | 0.00     | 0.00     | 0.00     | 0.01     | 0.00     | 0.00     | 0.00     | 0.00      | 0.00      | 0.00      |
| GH122      | 0.00     | 0.00     | 0.00     | 0.00     | 0.00     | 0.00     | 0.00     | 0.00     | 0.00     | 0.00     | 0.00     | 0.00     | 0.00     | 0.00      | 0.00      | 0.00      |
| GH74       | 0.02     | 0.05     | 0.00     | 0.00     | 0.00     | 0.04     | 0.06     | 0.08     | 0.00     | 0.00     | 0.03     | 0.04     | 0.00     | 0.00      | 0.00      | 0.01      |
| GT41       | 0.03     | 0.00     | 0.03     | 0.02     | 0.00     | 0.07     | 0.00     | 0.00     | 0.00     | 0.00     | 0.00     | 0.00     | 0.00     | 0.00      | 0.03      | 0.00      |
| PL1        | 0.14     | 0.48     | 0.22     | 0.17     | 0.33     | 0.21     | 0.18     | 0.08     | 0.10     | 0.35     | 0.28     | 0.24     | 0.38     | 0.07      | 0.11      | 0.16      |
| GH15       | 0.00     | 0.05     | 0.06     | 0.02     | 0.13     | 0.07     | 0.03     | 0.04     | 0.00     | 0.01     | 0.02     | 0.04     | 0.03     | 0.04      | 0.00      | 0.05      |
| GH32       | 0.80     | 0.53     | 0.33     | 0.41     | 0.49     | 0.28     | 0.31     | 0.27     | 0.34     | 0.40     | 0.37     | 0.29     | 0.46     | 0.38      | 0.40      | 0.38      |
| GH44       | 0.00     | 0.00     | 0.00     | 0.00     | 0.00     | 0.00     | 0.02     | 0.00     | 0.00     | 0.00     | 0.00     | 0.01     | 0.00     | 0.00      | 0.00      | 0.00      |
| GT6        | 0.00     | 0.00     | 0.00     | 0.00     | 0.00     | 0.00     | 0.00     | 0.00     | 0.00     | 0.00     | 0.00     | 0.00     | 0.01     | 0.00      | 0.00      | 0.00      |
| GH13       | 3.70     | 2.59     | 2.61     | 1.62     | 2.30     | 3.22     | 2.29     | 2.23     | 1.91     | 2.05     | 2.55     | 2.87     | 1.91     | 1.62      | 2.23      | 2.77      |
| GT80       | 0.00     | 0.02     | 0.01     | 0.00     | 0.00     | 0.00     | 0.01     | 0.02     | 0.05     | 0.01     | 0.02     | 0.01     | 0.01     | 0.02      | 0.00      | 0.02      |
| GH71       | 0.00     | 0.00     | 0.00     | 0.00     | 0.00     | 0.00     | 0.00     | 0.00     | 0.00     | 0.00     | 0.00     | 0.00     | 0.00     | 0.00      | 0.00      | 0.00      |
| GH63       | 0.03     | 0.07     | 0.08     | 0.07     | 0.07     | 0.14     | 0.12     | 0.17     | 0.05     | 0.06     | 0.09     | 0.15     | 0.14     | 0.13      | 0.03      | 0.07      |
| PL21       | 0.00     | 0.12     | 0.09     | 0.03     | 0.00     | 0.00     | 0.02     | 0.00     | 0.00     | 0.03     | 0.04     | 0.04     | 0.06     | 0.00      | 0.00      | 0.05      |
| GH65       | 0.20     | 0.15     | 0.13     | 0.14     | 0.13     | 0.14     | 0.16     | 0.13     | 0.05     | 0.12     | 0.11     | 0.15     | 0.14     | 0.04      | 0.06      | 0.17      |
| CE4        | 0.64     | 0.48     | 0.44     | 0.29     | 0.51     | 0.53     | 0.35     | 0.46     | 0.39     | 0.31     | 0.60     | 0.59     | 0.40     | 0.33      | 0.31      | 0.55      |
| CE14       | 0.00     | 0.05     | 0.05     | 0.02     | 0.02     | 0.00     | 0.01     | 0.00     | 0.00     | 0.01     | 0.02     | 0.00     | 0.04     | 0.02      | 0.00      | 0.01      |
| GH115      | 0.17     | 0.51     | 0.24     | 0.05     | 0.27     | 0.11     | 0.20     | 0.08     | 0.15     | 0.27     | 0.28     | 0.22     | 0.31     | 0.16      | 0.17      | 0.11      |
| GH104      | 0.00     | 0.00     | 0.00     | 0.00     | 0.00     | 0.00     | 0.00     | 0.02     | 0.00     | 0.00     | 0.00     | 0.01     | 0.00     | 0.02      | 0.00      | 0.00      |
| GH111      | 0.00     | 0.00     | 0.00     | 0.00     | 0.00     | 0.00     | 0.00     | 0.00     | 0.00     | 0.00     | 0.00     | 0.00     | 0.00     | 0.00      | 0.00      | 0.00      |
| GH95       | 0.30     | 0.75     | 0.65     | 0.49     | 0.66     | 0.21     | 0.50     | 0.32     | 0.59     | 0.68     | 0.56     | 0.45     | 0.56     | 0.40      | 0.37      | 0.44      |
| GT70       | 0.00     | 0.00     | 0.00     | 0.00     | 0.00     | 0.00     | 0.00     | 0.00     | 0.00     | 0.00     | 0.00     | 0.00     | 0.00     | 0.00      | 0.00      | 0.00      |
| CE10       | 0.02     | 0.15     | 0.24     | 0.10     | 0.22     | 0.07     | 0.13     | 0.21     | 0.05     | 0.22     | 0.08     | 0.09     | 0.24     | 0.18      | 0.11      | 0.11      |
| GH10       | 0.11     | 0.15     | 0.14     | 0.07     | 0.13     | 0.07     | 0.02     | 0.19     | 0.05     | 0.09     | 0.16     | 0.13     | 0.09     | 0.02      | 0.09      | 0.07      |
| GH130      | 0.20     | 0.32     | 0.27     | 0.27     | 0.18     | 0.39     | 0.21     | 0.21     | 0.10     | 0.21     | 0.37     | 0.44     | 0.34     | 0.22      | 0.23      | 0.28      |
| PL20       | 0.00     | 0.00     | 0.00     | 0.00     | 0.00     | 0.00     | 0.00     | 0.00     | 0.00     | 0.00     | 0.00     | 0.00     | 0.00     | 0.00      | 0.00      | 0.00      |
| GH69       | 0.00     | 0.00     | 0.00     | 0.00     | 0.00     | 0.00     | 0.00     | 0.00     | 0.00     | 0.00     | 0.00     | 0.00     | 0.00     | 0.00      | 0.00      | 0.00      |
| PL2        | 0.00     | 0.00     | 0.00     | 0.00     | 0.00     | 0.00     | 0.00     | 0.00     | 0.00     | 0.00     | 0.00     | 0.00     | 0.00     | 0.02      | 0.00      | 0.00      |
| GH49       | 0.00     | 0.00     | 0.00     | 0.00     | 0.00     | 0.00     | 0.00     | 0.00     | 0.00     | 0.00     | 0.00     | 0.00     | 0.00     | 0.00      | 0.00      | 0.00      |
| GH25       | 0.47     | 0.34     | 0.29     | 0.24     | 0.33     | 0.46     | 0.17     | 0.38     | 0.64     | 0.27     | 0.24     | 0.33     | 0.18     | 0.31      | 0.40      | 0.27      |
| GH59       | 0.00     | 0.00     | 0.00     | 0.00     | 0.00     | 0.00     | 0.04     | 0.00     | 0.00     | 0.00     | 0.04     | 0.01     | 0.00     | 0.00      | 0.00      | 0.01      |
| GH35       | 0.06     | 0.41     | 0.37     | 0.31     | 0.15     | 0.28     | 0.40     | 0.27     | 0.25     | 0.46     | 0.21     | 0.18     | 0.40     | 0.42      | 0.29      | 0.23      |
| GT39       | 0.02     | 0.00     | 0.00     | 0.00     | 0.00     | 0.00     | 0.00     | 0.02     | 0.00     | 0.00     | 0.00     | 0.00     | 0.00     | 0.00      | 0.00      | 0.01      |
| GT57       | 0.00     | 0.00     | 0.00     | 0.00     | 0.00     | 0.00     | 0.00     | 0.00     | 0.00     | 0.00     | 0.00     | 0.00     | 0.00     | 0.00      | 0.00      | 0.00      |
| GH129      | 0.00     | 0.02     | 0.00     | 0.00     | 0.00     | 0.00     | 0.00     | 0.00     | 0.00     | 0.00     | 0.00     | 0.00     | 0.00     | 0.00      | 0.00      | 0.00      |
| GT22       | 0.00     | 0.00     | 0.00     | 0.00     | 0.00     | 0.00     | 0.00     | 0.00     | 0.00     | 0.00     | 0.00     | 0.00     | 0.00     | 0.00      | 0.00      | 0.00      |
| PL12       | 0.00     | 0.22     | 0.13     | 0.09     | 0.09     | 0.00     | 0.08     | 0.04     | 0.00     | 0.07     | 0.14     | 0.05     | 0.13     | 0.00      | 0.00      | 0.15      |
| PL18       | 0.00     | 0.00     | 0.00     | 0.00     | 0.00     | 0.00     | 0.00     | 0.00     | 0.00     | 0.00     | 0.00     | 0.00     | 0.00     | 0.00      | 0.00      | 0.00      |
| GT92       | 0.00     | 0.00     | 0.00     | 0.00     | 0.00     | 0.00     | 0.00     | 0.00     | 0.00     | 0.00     | 0.00     | 0.00     | 0.00     | 0.00      | 0.00      | 0.00      |
| GT44       | 0.00     | 0.00     | 0.00     | 0.00     | 0.00     | 0.00     | 0.00     | 0.00     | 0.00     | 0.00     | 0.00     | 0.00     | 0.00     | 0.00      | 0.00      | 0.00      |
| GT29       | 0.00     | 0.00     | 0.00     | 0.00     | 0.00     | 0.00     | 0.00     | 0.00     | 0.00     | 0.00     | 0.00     | 0.00     | 0.00     | 0.00      | 0.00      | 0.00      |
| GT13       | 0.00     | 0.00     | 0.00     | 0.00     | 0.00     | 0.00     | 0.00     | 0.00     | 0.00     | 0.00     | 0.00     | 0.00     | 0.00     | 0.00      | 0.00      | 0.00      |

Normalized\_abundance\_2

| CAZY_group | CN-AD-87 | CN-AD-88 | CN-AD-89 | CN-AD-90 | CN-AD-91 | CN-AD-92 | CN-AD-93 | CN-AD-94 | CN-AD-95 | CN-AD-96 | CN-AD-97 | CN-AD-98 | CN-AD-99 | CN-AD-100 | CN-AD-101 | CN-AD-102 |
|------------|----------|----------|----------|----------|----------|----------|----------|----------|----------|----------|----------|----------|----------|-----------|-----------|-----------|
| GT52       | 0.00     | 0.00     | 0.00     | 0.00     | 0.00     | 0.00     | 0.00     | 0.00     | 0.00     | 0.00     | 0.00     | 0.00     | 0.00     | 0.00      | 0.00      | 0.00      |
| GT64       | 0.00     | 0.00     | 0.00     | 0.00     | 0.00     | 0.00     | 0.00     | 0.00     | 0.00     | 0.00     | 0.00     | 0.00     | 0.00     | 0.00      | 0.00      | 0.00      |
| GT85       | 0.00     | 0.00     | 0.00     | 0.00     | 0.00     | 0.00     | 0.00     | 0.00     | 0.00     | 0.00     | 0.00     | 0.00     | 0.00     | 0.00      | 0.00      | 0.00      |
| GT16       | 0.00     | 0.00     | 0.00     | 0.00     | 0.00     | 0.00     | 0.00     | 0.00     | 0.00     | 0.00     | 0.00     | 0.00     | 0.00     | 0.00      | 0.00      | 0.00      |
| GH56       | 0.00     | 0.00     | 0.00     | 0.00     | 0.00     | 0.00     | 0.00     | 0.00     | 0.00     | 0.00     | 0.00     | 0.00     | 0.00     | 0.00      | 0.00      | 0.00      |
| GT60       | 0.00     | 0.00     | 0.00     | 0.00     | 0.00     | 0.00     | 0.00     | 0.00     | 0.00     | 0.00     | 0.00     | 0.00     | 0.00     | 0.00      | 0.00      | 0.00      |
| GH41       | 0.00     | 0.00     | 0.00     | 0.00     | 0.00     | 0.00     | 0.00     | 0.00     | 0.00     | 0.00     | 0.00     | 0.00     | 0.00     | 0.00      | 0.00      | 0.00      |
| CE7        | 0.08     | 0.19     | 0.12     | 0.07     | 0.15     | 0.07     | 0.09     | 0.06     | 0.15     | 0.12     | 0.09     | 0.08     | 0.18     | 0.11      | 0.06      | 0.07      |
| GH39       | 0.11     | 0.12     | 0.02     | 0.02     | 0.02     | 0.21     | 0.03     | 0.04     | 0.00     | 0.00     | 0.04     | 0.03     | 0.02     | 0.00      | 0.00      | 0.05      |
| GT30       | 0.19     | 0.46     | 0.41     | 0.27     | 0.18     | 0.21     | 0.24     | 0.25     | 0.25     | 0.32     | 0.20     | 0.21     | 0.31     | 0.35      | 0.17      | 0.17      |
| PL15       | 0.00     | 0.22     | 0.15     | 0.05     | 0.09     | 0.00     | 0.10     | 0.00     | 0.10     | 0.06     | 0.12     | 0.17     | 0.18     | 0.00      | 0.00      | 0.14      |
| GH102      | 0.00     | 0.07     | 0.07     | 0.02     | 0.00     | 0.04     | 0.02     | 0.06     | 0.05     | 0.00     | 0.01     | 0.05     | 0.00     | 0.07      | 0.06      | 0.01      |



## Normalized\_abundance\_2

| CAZY_group | CN-AD-103 | CN-AD-104 | CN-AD-105 | CN-AD-106 | CN-AD-107 | CN-AD-108 | CN-AD-109 | CN-AD-110 | CN-AD-111 | CN-AD-112 | CN-AD-113 | CN-AD-114 | CN-AD-115 | CN-AD-116 | CN-AD-117 | CN-AD-118 |
|------------|-----------|-----------|-----------|-----------|-----------|-----------|-----------|-----------|-----------|-----------|-----------|-----------|-----------|-----------|-----------|-----------|
| GH29       | 0.64      | 0.78      | 0.55      | 0.62      | 0.58      | 0.86      | 0.21      | 0.67      | 0.69      | 0.80      | 0.54      | 0.57      | 0.78      | 0.65      | 0.58      | 0.72      |
| PL4        | 0.00      | 0.00      | 0.00      | 0.01      | 0.01      | 0.00      | 0.00      | 0.00      | 0.00      | 0.00      | 0.00      | 0.00      | 0.00      | 0.01      | 0.00      | 0.00      |
| GH23       | 0.93      | 1.05      | 0.92      | 1.00      | 1.07      | 0.92      | 0.93      | 1.01      | 1.04      | 0.89      | 0.76      | 0.93      | 0.78      | 0.98      | 0.89      | 1.06      |
| CE6        | 0.00      | 0.08      | 0.01      | 0.07      | 0.01      | 0.04      | 0.00      | 0.05      | 0.02      | 0.05      | 0.02      | 0.04      | 0.06      | 0.07      | 0.13      | 0.06      |
| GH72       | 0.07      | 0.05      | 0.11      | 0.06      | 0.11      | 0.06      | 0.08      | 0.03      | 0.03      | 0.07      | 0.05      | 0.07      | 0.04      | 0.06      | 0.13      | 0.09      |
| GH114      | 0.00      | 0.00      | 0.00      | 0.00      | 0.00      | 0.00      | 0.00      | 0.00      | 0.00      | 0.00      | 0.00      | 0.00      | 0.00      | 0.00      | 0.00      | 0.00      |
| GH78       | 0.28      | 0.83      | 0.50      | 0.64      | 0.44      | 0.65      | 0.23      | 0.91      | 0.77      | 1.32      | 0.72      | 0.58      | 1.10      | 1.12      | 1.04      | 0.92      |
| PL19       | 0.00      | 0.00      | 0.00      | 0.00      | 0.00      | 0.00      | 0.00      | 0.00      | 0.00      | 0.00      | 0.00      | 0.00      | 0.00      | 0.00      | 0.00      | 0.00      |
| GT27       | 0.00      | 0.00      | 0.00      | 0.00      | 0.00      | 0.00      | 0.00      | 0.00      | 0.00      | 0.02      | 0.00      | 0.00      | 0.00      | 0.00      | 0.00      | 0.00      |
| GH5        | 0.21      | 0.37      | 0.42      | 0.34      | 0.27      | 0.39      | 0.48      | 0.79      | 0.12      | 0.27      | 0.15      | 0.46      | 0.21      | 0.24      | 0.40      | 0.37      |
| GT40       | 0.00      | 0.00      | 0.00      | 0.00      | 0.00      | 0.00      | 0.00      | 0.00      | 0.00      | 0.00      | 0.00      | 0.00      | 0.00      | 0.00      | 0.00      | 0.00      |
| CE13       | 0.01      | 0.00      | 0.00      | 0.00      | 0.00      | 0.00      | 0.00      | 0.00      | 0.00      | 0.00      | 0.00      | 0.00      | 0.00      | 0.00      | 0.00      | 0.00      |
| GT37       | 0.00      | 0.00      | 0.00      | 0.00      | 0.00      | 0.00      | 0.00      | 0.00      | 0.00      | 0.00      | 0.00      | 0.00      | 0.00      | 0.00      | 0.00      | 0.00      |
| GH33       | 0.12      | 0.19      | 0.23      | 0.25      | 0.17      | 0.14      | 0.08      | 0.15      | 0.26      | 0.27      | 0.22      | 0.16      | 0.38      | 0.29      | 0.21      | 0.14      |
| GT65       | 0.00      | 0.00      | 0.00      | 0.00      | 0.00      | 0.00      | 0.00      | 0.00      | 0.00      | 0.00      | 0.00      | 0.00      | 0.00      | 0.00      | 0.00      | 0.00      |
| GH86       | 0.00      | 0.00      | 0.00      | 0.00      | 0.00      | 0.00      | 0.00      | 0.02      | 0.00      | 0.00      | 0.00      | 0.01      | 0.00      | 0.00      | 0.00      | 0.00      |
| GH123      | 0.00      | 0.16      | 0.14      | 0.11      | 0.05      | 0.04      | 0.02      | 0.14      | 0.13      | 0.15      | 0.22      | 0.09      | 0.13      | 0.16      | 0.13      | 0.11      |
| GH96       | 0.00      | 0.00      | 0.00      | 0.00      | 0.00      | 0.00      | 0.00      | 0.00      | 0.00      | 0.00      | 0.00      | 0.00      | 0.00      | 0.00      | 0.00      | 0.00      |
| GH14       | 0.00      | 0.00      | 0.00      | 0.00      | 0.00      | 0.00      | 0.00      | 0.00      | 0.00      | 0.00      | 0.00      | 0.00      | 0.00      | 0.00      | 0.00      | 0.00      |
| CE3        | 0.00      | 0.00      | 0.00      | 0.00      | 0.00      | 0.00      | 0.00      | 0.00      | 0.00      | 0.00      | 0.00      | 0.00      | 0.00      | 0.00      | 0.00      | 0.00      |
| PL10       | 0.00      | 0.18      | 0.11      | 0.20      | 0.08      | 0.10      | 0.02      | 0.22      | 0.06      | 0.20      | 0.07      | 0.10      | 0.13      | 0.14      | 0.09      | 0.11      |
| GT48       | 0.00      | 0.00      | 0.00      | 0.00      | 0.00      | 0.00      | 0.00      | 0.00      | 0.00      | 0.00      | 0.00      | 0.00      | 0.00      | 0.00      | 0.00      | 0.00      |
| PL6        | 0.00      | 0.02      | 0.00      | 0.00      | 0.00      | 0.00      | 0.00      | 0.00      | 0.00      | 0.00      | 0.00      | 0.00      | 0.00      | 0.00      | 0.00      | 0.00      |
| GT83       | 0.14      | 0.06      | 0.02      | 0.12      | 0.12      | 0.10      | 0.08      | 0.07      | 0.10      | 0.13      | 0.12      | 0.07      | 0.13      | 0.09      | 0.06      | 0.08      |
| GH126      | 0.00      | 0.00      | 0.00      | 0.00      | 0.00      | 0.00      | 0.00      | 0.00      | 0.00      | 0.00      | 0.00      | 0.00      | 0.00      | 0.00      | 0.00      | 0.00      |
| GH9        | 0.01      | 0.18      | 0.27      | 0.35      | 0.06      | 0.23      | 0.06      | 0.38      | 0.06      | 0.23      | 0.08      | 0.30      | 0.13      | 0.13      | 0.23      | 0.23      |
| GH75       | 0.00      | 0.00      | 0.00      | 0.00      | 0.00      | 0.00      | 0.00      | 0.00      | 0.00      | 0.00      | 0.00      | 0.00      | 0.00      | 0.00      | 0.00      | 0.00      |
| GT71       | 0.00      | 0.00      | 0.00      | 0.00      | 0.00      | 0.00      | 0.00      | 0.00      | 0.00      | 0.00      | 0.00      | 0.00      | 0.00      | 0.00      | 0.00      | 0.00      |
| GH46       | 0.00      | 0.00      | 0.00      | 0.00      | 0.00      | 0.00      | 0.00      | 0.00      | 0.00      | 0.00      | 0.00      | 0.00      | 0.00      | 0.00      | 0.00      | 0.00      |
| GT61       | 0.00      | 0.00      | 0.00      | 0.00      | 0.00      | 0.00      | 0.00      | 0.00      | 0.00      | 0.00      | 0.00      | 0.00      | 0.00      | 0.00      | 0.00      | 0.00      |
| GT3        | 0.00      | 0.08      | 0.09      | 0.09      | 0.13      | 0.06      | 0.00      | 0.22      | 0.10      | 0.07      | 0.08      | 0.16      | 0.08      | 0.16      | 0.11      | 0.12      |
| PL3        | 0.00      | 0.00      | 0.01      | 0.00      | 0.00      | 0.00      | 0.00      | 0.00      | 0.00      | 0.00      | 0.00      | 0.00      | 0.00      | 0.00      | 0.00      | 0.00      |
| GH108      | 0.00      | 0.03      | 0.01      | 0.09      | 0.04      | 0.00      | 0.00      | 0.03      | 0.01      | 0.08      | 0.02      | 0.02      | 0.08      | 0.05      | 0.06      | 0.08      |
| GT56       | 0.01      | 0.00      | 0.00      | 0.00      | 0.00      | 0.00      | 0.02      | 0.00      | 0.00      | 0.02      | 0.00      | 0.00      | 0.00      | 0.02      | 0.00      | 0.00      |
| PL11       | 0.01      | 0.16      | 0.17      | 0.31      | 0.13      | 0.14      | 0.04      | 0.15      | 0.06      | 0.25      | 0.02      | 0.17      | 0.32      | 0.15      | 0.21      | 0.06      |
| GH45       | 0.00      | 0.00      | 0.00      | 0.00      | 0.00      | 0.00      | 0.00      | 0.00      | 0.00      | 0.00      | 0.00      | 0.00      | 0.00      | 0.01      | 0.00      | 0.00      |
| GT34       | 0.00      | 0.00      | 0.00      | 0.00      | 0.00      | 0.00      | 0.00      | 0.00      | 0.00      | 0.00      | 0.00      | 0.00      | 0.00      | 0.00      | 0.00      | 0.00      |
| PL14       | 0.00      | 0.00      | 0.00      | 0.00      | 0.00      | 0.00      | 0.00      | 0.00      | 0.00      | 0.00      | 0.00      | 0.00      | 0.00      | 0.00      | 0.00      | 0.00      |
| GH19       | 0.04      | 0.00      | 0.00      | 0.00      | 0.00      | 0.00      | 0.00      | 0.02      | 0.00      | 0.00      | 0.00      | 0.00      | 0.00      | 0.00      | 0.02      | 0.02      |
| GH118      | 0.00      | 0.00      | 0.00      | 0.00      | 0.00      | 0.00      | 0.00      | 0.00      | 0.00      | 0.00      | 0.00      | 0.00      | 0.00      | 0.00      | 0.00      | 0.00      |
| GH82       | 0.00      | 0.00      | 0.00      | 0.00      | 0.00      | 0.00      | 0.00      | 0.00      | 0.00      | 0.00      | 0.00      | 0.00      | 0.00      | 0.00      | 0.00      | 0.00      |
| GH76       | 0.00      | 0.22      | 0.16      | 0.25      | 0.00      | 0.29      | 0.04      | 0.12      | 0.18      | 0.38      | 0.12      | 0.18      | 0.32      | 0.24      | 0.34      | 0.37      |
| GT4        | 1.43      | 1.27      | 1.45      | 1.78      | 1.54      | 2.21      | 1.16      | 1.71      | 1.71      | 1.71      | 1.68      | 1.51      | 1.58      | 1.72      | 1.64      | 1.68      |
| GT87       | 0.00      | 0.00      | 0.00      | 0.00      | 0.00      | 0.00      | 0.00      | 0.00      | 0.00      | 0.00      | 0.00      | 0.00      | 0.00      | 0.00      | 0.00      | 0.00      |
| GH24       | 0.01      | 0.13      | 0.12      | 0.21      | 0.15      | 0.31      | 0.10      | 0.24      | 0.18      | 0.20      | 0.20      | 0.16      | 0.27      | 0.15      | 0.17      | 0.14      |
| GH90       | 0.00      | 0.00      | 0.00      | 0.00      | 0.00      | 0.00      | 0.00      | 0.00      | 0.00      | 0.00      | 0.00      | 0.00      | 0.00      | 0.00      | 0.00      | 0.00      |
| GH57       | 0.00      | 0.05      | 0.07      | 0.09      | 0.08      | 0.08      | 0.02      | 0.12      | 0.11      | 0.08      | 0.07      | 0.10      | 0.10      | 0.13      | 0.21      | 0.15      |
| GH36       | 0.62      | 0.75      | 0.58      | 0.66      | 0.66      | 0.59      | 0.41      | 0.70      | 0.57      | 0.74      | 0.51      | 0.64      | 0.67      | 0.57      | 0.43      | 0.65      |
| GT46       | 0.00      | 0.00      | 0.00      | 0.00      | 0.00      | 0.00      | 0.00      | 0.00      | 0.00      | 0.00      | 0.00      | 0.00      | 0.00      | 0.00      | 0.00      | 0.00      |
| GH66       | 0.07      | 0.00      | 0.05      | 0.06      | 0.01      | 0.04      | 0.00      | 0.03      | 0.03      | 0.08      | 0.00      | 0.03      | 0.00      | 0.06      | 0.04      | 0.03      |

Normalized\_abundance\_2

| CAZY_group | CN-AD-103 | CN-AD-104 | CN-AD-105 | CN-AD-106 | CN-AD-107 | CN-AD-108 | CN-AD-109 | CN-AD-110 | CN-AD-111 | CN-AD-112 | CN-AD-113 | CN-AD-114 | CN-AD-115 | CN-AD-116 | CN-AD-117 | CN-AD-118 |
|------------|-----------|-----------|-----------|-----------|-----------|-----------|-----------|-----------|-----------|-----------|-----------|-----------|-----------|-----------|-----------|-----------|
| GH48       | 0.00      | 0.00      | 0.00      | 0.00      | 0.00      | 0.00      | 0.00      | 0.00      | 0.00      | 0.00      | 0.00      | 0.00      | 0.01      | 0.00      | 0.00      | 0.00      |
| GT53       | 0.00      | 0.00      | 0.00      | 0.00      | 0.00      | 0.00      | 0.00      | 0.00      | 0.00      | 0.00      | 0.00      | 0.00      | 0.00      | 0.00      | 0.00      | 0.00      |
| GH60       | 0.00      | 0.00      | 0.00      | 0.00      | 0.00      | 0.00      | 0.00      | 0.00      | 0.00      | 0.00      | 0.00      | 0.00      | 0.00      | 0.00      | 0.00      | 0.00      |
| GT31       | 0.00      | 0.00      | 0.00      | 0.00      | 0.00      | 0.00      | 0.02      | 0.00      | 0.00      | 0.00      | 0.00      | 0.00      | 0.00      | 0.00      | 0.00      | 0.00      |
| GH105      | 0.06      | 0.73      | 0.58      | 0.77      | 0.37      | 0.51      | 0.14      | 0.67      | 0.32      | 0.59      | 0.40      | 0.59      | 0.57      | 0.55      | 0.66      | 0.72      |
| GT23       | 0.00      | 0.02      | 0.01      | 0.00      | 0.01      | 0.00      | 0.00      | 0.00      | 0.02      | 0.00      | 0.00      | 0.00      | 0.02      | 0.00      | 0.00      | 0.00      |
| GH11       | 0.00      | 0.00      | 0.00      | 0.00      | 0.00      | 0.00      | 0.00      | 0.00      | 0.00      | 0.00      | 0.00      | 0.02      | 0.00      | 0.00      | 0.00      | 0.00      |
| GT38       | 0.00      | 0.00      | 0.00      | 0.00      | 0.00      | 0.00      | 0.00      | 0.00      | 0.00      | 0.00      | 0.00      | 0.00      | 0.00      | 0.00      | 0.00      | 0.00      |
| GT43       | 0.00      | 0.00      | 0.00      | 0.00      | 0.00      | 0.00      | 0.00      | 0.00      | 0.00      | 0.00      | 0.00      | 0.00      | 0.00      | 0.00      | 0.00      | 0.00      |
| GH99       | 0.00      | 0.00      | 0.01      | 0.02      | 0.00      | 0.04      | 0.00      | 0.00      | 0.01      | 0.02      | 0.02      | 0.03      | 0.02      | 0.02      | 0.00      | 0.02      |
| GH38       | 0.22      | 0.14      | 0.15      | 0.26      | 0.10      | 0.14      | 0.23      | 0.27      | 0.18      | 0.25      | 0.19      | 0.19      | 0.15      | 0.23      | 0.30      | 0.34      |
| GH109      | 0.00      | 0.29      | 0.16      | 0.26      | 0.13      | 0.29      | 0.02      | 0.31      | 0.15      | 0.27      | 0.29      | 0.27      | 0.17      | 0.28      | 0.21      | 0.28      |
| GH2        | 1.48      | 3.55      | 3.39      | 3.82      | 2.92      | 3.97      | 2.02      | 4.22      | 3.40      | 5.05      | 3.37      | 3.49      | 4.46      | 3.98      | 4.84      | 4.68      |
| GT28       | 0.53      | 0.43      | 0.34      | 0.31      | 0.47      | 0.25      | 0.27      | 0.27      | 0.38      | 0.23      | 0.40      | 0.33      | 0.15      | 0.27      | 0.23      | 0.32      |
| GH42       | 0.40      | 0.27      | 0.28      | 0.20      | 0.23      | 0.06      | 0.21      | 0.17      | 0.17      | 0.15      | 0.10      | 0.12      | 0.13      | 0.06      | 0.11      | 0.17      |
| GT58       | 0.00      | 0.00      | 0.00      | 0.00      | 0.00      | 0.00      | 0.00      | 0.00      | 0.00      | 0.00      | 0.00      | 0.00      | 0.00      | 0.00      | 0.00      | 0.00      |
| GH61       | 0.00      | 0.00      | 0.00      | 0.00      | 0.00      | 0.00      | 0.00      | 0.00      | 0.00      | 0.00      | 0.00      | 0.00      | 0.00      | 0.00      | 0.00      | 0.00      |
| GH80       | 0.00      | 0.00      | 0.00      | 0.00      | 0.00      | 0.00      | 0.00      | 0.00      | 0.00      | 0.00      | 0.00      | 0.00      | 0.00      | 0.00      | 0.00      | 0.00      |
| GH98       | 0.00      | 0.00      | 0.00      | 0.00      | 0.01      | 0.00      | 0.00      | 0.02      | 0.00      | 0.02      | 0.02      | 0.02      | 0.02      | 0.01      | 0.02      | 0.02      |
| GH6        | 0.00      | 0.00      | 0.00      | 0.00      | 0.00      | 0.00      | 0.00      | 0.00      | 0.00      | 0.00      | 0.00      | 0.00      | 0.00      | 0.00      | 0.00      | 0.00      |
| GT1        | 0.17      | 0.03      | 0.05      | 0.02      | 0.03      | 0.02      | 0.04      | 0.02      | 0.02      | 0.02      | 0.03      | 0.02      | 0.02      | 0.02      | 0.06      | 0.03      |
| GH28       | 0.17      | 0.78      | 0.79      | 0.87      | 0.52      | 0.68      | 0.27      | 1.01      | 0.55      | 0.85      | 0.47      | 0.62      | 1.14      | 0.76      | 0.98      | 0.92      |
| GT42       | 0.00      | 0.00      | 0.00      | 0.00      | 0.00      | 0.00      | 0.00      | 0.00      | 0.00      | 0.00      | 0.00      | 0.00      | 0.00      | 0.00      | 0.00      | 0.00      |
| GH128      | 0.00      | 0.00      | 0.00      | 0.00      | 0.00      | 0.00      | 0.00      | 0.00      | 0.00      | 0.00      | 0.00      | 0.00      | 0.00      | 0.00      | 0.00      | 0.00      |
| CE12       | 0.00      | 0.19      | 0.16      | 0.17      | 0.10      | 0.18      | 0.04      | 0.15      | 0.10      | 0.18      | 0.03      | 0.12      | 0.25      | 0.20      | 0.11      | 0.17      |
| CE16       | 0.00      | 0.00      | 0.00      | 0.00      | 0.00      | 0.00      | 0.00      | 0.00      | 0.00      | 0.00      | 0.00      | 0.00      | 0.00      | 0.00      | 0.00      | 0.00      |
| GT89       | 0.00      | 0.00      | 0.00      | 0.00      | 0.00      | 0.00      | 0.00      | 0.00      | 0.00      | 0.00      | 0.00      | 0.00      | 0.00      | 0.00      | 0.00      | 0.00      |
| GT11       | 0.00      | 0.08      | 0.05      | 0.07      | 0.06      | 0.10      | 0.00      | 0.02      | 0.07      | 0.03      | 0.07      | 0.05      | 0.06      | 0.06      | 0.02      | 0.05      |
| GT77       | 0.00      | 0.03      | 0.00      | 0.01      | 0.00      | 0.02      | 0.00      | 0.02      | 0.01      | 0.00      | 0.02      | 0.00      | 0.02      | 0.00      | 0.02      | 0.00      |
| GT55       | 0.00      | 0.00      | 0.00      | 0.00      | 0.00      | 0.00      | 0.00      | 0.00      | 0.00      | 0.00      | 0.00      | 0.00      | 0.00      | 0.00      | 0.00      | 0.00      |
| GT18       | 0.00      | 0.00      | 0.00      | 0.00      | 0.00      | 0.00      | 0.00      | 0.00      | 0.00      | 0.00      | 0.00      | 0.00      | 0.00      | 0.00      | 0.00      | 0.00      |
| GH87       | 0.10      | 0.00      | 0.00      | 0.00      | 0.03      | 0.00      | 0.00      | 0.02      | 0.01      | 0.00      | 0.02      | 0.00      | 0.00      | 0.00      | 0.00      | 0.02      |
| PL5        | 0.00      | 0.00      | 0.00      | 0.00      | 0.00      | 0.00      | 0.00      | 0.00      | 0.00      | 0.00      | 0.00      | 0.00      | 0.00      | 0.00      | 0.00      | 0.00      |
| GH22       | 0.00      | 0.00      | 0.00      | 0.00      | 0.00      | 0.00      | 0.00      | 0.00      | 0.00      | 0.00      | 0.00      | 0.00      | 0.00      | 0.00      | 0.00      | 0.00      |
| CE2        | 0.03      | 0.00      | 0.05      | 0.02      | 0.03      | 0.08      | 0.02      | 0.12      | 0.06      | 0.05      | 0.00      | 0.05      | 0.02      | 0.07      | 0.08      | 0.08      |
| GH120      | 0.12      | 0.02      | 0.10      | 0.04      | 0.04      | 0.00      | 0.10      | 0.03      | 0.06      | 0.00      | 0.03      | 0.00      | 0.00      | 0.01      | 0.00      | 0.11      |
| GH73       | 0.68      | 0.43      | 0.32      | 0.39      | 0.36      | 0.35      | 0.21      | 0.41      | 0.40      | 0.32      | 0.24      | 0.37      | 0.30      | 0.41      | 0.34      | 0.32      |
| GT17       | 0.00      | 0.00      | 0.00      | 0.00      | 0.00      | 0.00      | 0.00      | 0.00      | 0.00      | 0.00      | 0.00      | 0.00      | 0.00      | 0.00      | 0.00      | 0.00      |
| GH124      | 0.00      | 0.00      | 0.00      | 0.00      | 0.00      | 0.00      | 0.00      | 0.00      | 0.00      | 0.00      | 0.00      | 0.00      | 0.00      | 0.00      | 0.00      | 0.00      |
| GH54       | 0.00      | 0.00      | 0.00      | 0.00      | 0.00      | 0.00      | 0.00      | 0.00      | 0.00      | 0.00      | 0.00      | 0.00      | 0.00      | 0.00      | 0.00      | 0.00      |
| GH100      | 0.00      | 0.00      | 0.00      | 0.00      | 0.00      | 0.00      | 0.00      | 0.00      | 0.00      | 0.00      | 0.00      | 0.00      | 0.00      | 0.00      | 0.00      | 0.00      |
| GH113      | 0.01      | 0.02      | 0.03      | 0.01      | 0.03      | 0.04      | 0.04      | 0.05      | 0.03      | 0.00      | 0.03      | 0.03      | 0.00      | 0.00      | 0.00      | 0.00      |
| GT5        | 0.46      | 0.45      | 0.42      | 0.42      | 0.40      | 0.31      | 0.25      | 0.31      | 0.49      | 0.13      | 0.34      | 0.43      | 0.19      | 0.24      | 0.21      | 0.31      |
| GH94       | 0.28      | 0.19      | 0.40      | 0.35      | 0.44      | 0.23      | 0.37      | 0.27      | 0.19      | 0.13      | 0.29      | 0.31      | 0.08      | 0.13      | 0.13      | 0.22      |
| GT66       | 0.00      | 0.00      | 0.00      | 0.00      | 0.00      | 0.00      | 0.00      | 0.00      | 0.00      | 0.00      | 0.00      | 0.00      | 0.00      | 0.00      | 0.00      | 0.00      |
| GT94       | 0.00      | 0.00      | 0.00      | 0.00      | 0.00      | 0.00      | 0.00      | 0.00      | 0.00      | 0.00      | 0.00      | 0.00      | 0.00      | 0.00      | 0.00      | 0.00      |
| GH58       | 0.00      | 0.00      | 0.00      | 0.00      | 0.00      | 0.00      | 0.00      | 0.00      | 0.00      | 0.00      | 0.00      | 0.00      | 0.00      | 0.00      | 0.00      | 0.00      |
| GH1        | 1.48      | 0.81      | 0.54      | 0.52      | 0.93      | 0.14      | 0.54      | 0.17      | 0.74      | 0.20      | 0.30      | 0.26      | 0.11      | 0.39      | 0.38      | 0.57      |
| PL22       | 0.01      | 0.00      | 0.00      | 0.00      | 0.00      | 0.00      | 0.00      | 0.00      | 0.00      | 0.00      | 0.00      | 0.01      | 0.00      | 0.00      | 0.00      | 0.00      |
| GT9        | 0.30      | 0.16      | 0.09      | 0.12      | 0.24      | 0.18      | 0.23      | 0.15      | 0.07      | 0.20      | 0.08      | 0.06      | 0.23      | 0.21      | 0.06      | 0.11      |

## Normalized\_abundance\_2

| CAZY_group | CN-AD-103 | CN-AD-104 | CN-AD-105 | CN-AD-106 | CN-AD-107 | CN-AD-108 | CN-AD-109 | CN-AD-110 | CN-AD-111 | CN-AD-112 | CN-AD-113 | CN-AD-114 | CN-AD-115 | CN-AD-116 | CN-AD-117 | CN-AD-118 |
|------------|-----------|-----------|-----------|-----------|-----------|-----------|-----------|-----------|-----------|-----------|-----------|-----------|-----------|-----------|-----------|-----------|
| GT76       | 0.00      | 0.00      | 0.00      | 0.00      | 0.00      | 0.00      | 0.00      | 0.00      | 0.00      | 0.00      | 0.00      | 0.00      | 0.00      | 0.00      | 0.00      | 0.00      |
| GT32       | 0.01      | 0.08      | 0.03      | 0.07      | 0.08      | 0.10      | 0.04      | 0.05      | 0.07      | 0.05      | 0.13      | 0.11      | 0.08      | 0.07      | 0.02      | 0.14      |
| GT47       | 0.10      | 0.08      | 0.02      | 0.05      | 0.03      | 0.04      | 0.02      | 0.00      | 0.02      | 0.02      | 0.02      | 0.02      | 0.01      | 0.00      | 0.02      | 0.09      |
| GH84       | 0.17      | 0.21      | 0.08      | 0.10      | 0.10      | 0.14      | 0.06      | 0.05      | 0.17      | 0.12      | 0.19      | 0.15      | 0.11      | 0.08      | 0.08      | 0.14      |
| GH83       | 0.00      | 0.00      | 0.00      | 0.00      | 0.00      | 0.00      | 0.00      | 0.00      | 0.00      | 0.00      | 0.00      | 0.00      | 0.00      | 0.00      | 0.00      | 0.00      |
| GT59       | 0.00      | 0.00      | 0.00      | 0.00      | 0.00      | 0.00      | 0.00      | 0.00      | 0.00      | 0.00      | 0.00      | 0.00      | 0.00      | 0.00      | 0.00      | 0.00      |
| GH34       | 0.00      | 0.00      | 0.00      | 0.00      | 0.00      | 0.00      | 0.00      | 0.00      | 0.00      | 0.00      | 0.00      | 0.00      | 0.00      | 0.00      | 0.00      | 0.00      |
| GT14       | 0.00      | 0.00      | 0.00      | 0.06      | 0.03      | 0.10      | 0.00      | 0.02      | 0.03      | 0.03      | 0.03      | 0.03      | 0.01      | 0.04      | 0.03      | 0.06      |
| GH47       | 0.00      | 0.00      | 0.00      | 0.00      | 0.00      | 0.00      | 0.00      | 0.00      | 0.00      | 0.00      | 0.00      | 0.00      | 0.00      | 0.00      | 0.01      | 0.00      |
| GH97       | 0.00      | 0.88      | 0.59      | 0.90      | 0.26      | 1.00      | 0.19      | 1.01      | 0.48      | 1.25      | 0.44      | 0.75      | 0.97      | 1.31      | 0.96      | 1.25      |
| GH50       | 0.00      | 0.03      | 0.05      | 0.02      | 0.03      | 0.00      | 0.00      | 0.07      | 0.02      | 0.05      | 0.00      | 0.03      | 0.11      | 0.02      | 0.06      | 0.05      |
| GT26       | 0.24      | 0.18      | 0.09      | 0.16      | 0.17      | 0.16      | 0.14      | 0.10      | 0.12      | 0.15      | 0.17      | 0.17      | 0.02      | 0.16      | 0.15      | 0.14      |
| GH18       | 0.43      | 0.53      | 0.42      | 0.52      | 0.39      | 0.61      | 0.39      | 0.60      | 0.64      | 0.52      | 0.30      | 0.62      | 0.61      | 0.55      | 0.66      | 0.75      |
| GH37       | 0.03      | 0.00      | 0.00      | 0.00      | 0.00      | 0.00      | 0.06      | 0.00      | 0.00      | 0.08      | 0.00      | 0.00      | 0.00      | 0.01      | 0.00      | 0.00      |
| PL13       | 0.00      | 0.00      | 0.03      | 0.05      | 0.01      | 0.06      | 0.00      | 0.03      | 0.01      | 0.12      | 0.00      | 0.03      | 0.06      | 0.03      | 0.06      | 0.02      |
| GH27       | 0.03      | 0.21      | 0.17      | 0.25      | 0.14      | 0.23      | 0.06      | 0.27      | 0.22      | 0.22      | 0.19      | 0.26      | 0.23      | 0.30      | 0.36      | 0.20      |
| GT54       | 0.00      | 0.00      | 0.00      | 0.00      | 0.00      | 0.00      | 0.00      | 0.00      | 0.00      | 0.00      | 0.00      | 0.00      | 0.00      | 0.00      | 0.00      | 0.00      |
| GT91       | 0.00      | 0.00      | 0.00      | 0.00      | 0.00      | 0.00      | 0.00      | 0.00      | 0.00      | 0.00      | 0.00      | 0.00      | 0.00      | 0.00      | 0.00      | 0.00      |
| GT72       | 0.00      | 0.00      | 0.00      | 0.00      | 0.00      | 0.00      | 0.00      | 0.00      | 0.00      | 0.00      | 0.00      | 0.00      | 0.00      | 0.00      | 0.00      | 0.00      |
| GH67       | 0.00      | 0.11      | 0.07      | 0.05      | 0.02      | 0.04      | 0.04      | 0.12      | 0.02      | 0.10      | 0.00      | 0.07      | 0.10      | 0.06      | 0.09      | 0.08      |
| GH12       | 0.00      | 0.00      | 0.00      | 0.00      | 0.00      | 0.00      | 0.00      | 0.00      | 0.00      | 0.00      | 0.00      | 0.00      | 0.00      | 0.00      | 0.00      | 0.00      |
| GH91       | 0.03      | 0.08      | 0.00      | 0.00      | 0.01      | 0.06      | 0.00      | 0.02      | 0.03      | 0.03      | 0.05      | 0.04      | 0.02      | 0.01      | 0.02      | 0.00      |
| GT69       | 0.00      | 0.00      | 0.00      | 0.00      | 0.00      | 0.00      | 0.00      | 0.00      | 0.00      | 0.00      | 0.00      | 0.00      | 0.00      | 0.00      | 0.00      | 0.00      |
| GH106      | 0.00      | 0.18      | 0.18      | 0.20      | 0.18      | 0.20      | 0.02      | 0.29      | 0.20      | 0.40      | 0.15      | 0.16      | 0.46      | 0.27      | 0.25      | 0.18      |
| GT62       | 0.00      | 0.00      | 0.00      | 0.00      | 0.00      | 0.00      | 0.00      | 0.00      | 0.00      | 0.00      | 0.00      | 0.00      | 0.00      | 0.00      | 0.00      | 0.00      |
| GH17       | 0.00      | 0.00      | 0.00      | 0.00      | 0.00      | 0.00      | 0.00      | 0.00      | 0.00      | 0.00      | 0.00      | 0.00      | 0.00      | 0.00      | 0.00      | 0.00      |
| GH88       | 0.15      | 0.29      | 0.24      | 0.32      | 0.11      | 0.25      | 0.00      | 0.63      | 0.26      | 0.60      | 0.29      | 0.41      | 0.32      | 0.31      | 0.64      | 0.51      |
| CE5        | 0.00      | 0.00      | 0.00      | 0.00      | 0.00      | 0.00      | 0.00      | 0.00      | 0.00      | 0.00      | 0.00      | 0.00      | 0.00      | 0.00      | 0.00      | 0.00      |
| GT8        | 0.29      | 0.05      | 0.06      | 0.05      | 0.19      | 0.08      | 0.14      | 0.03      | 0.10      | 0.07      | 0.05      | 0.04      | 0.10      | 0.07      | 0.08      | 0.05      |
| GT50       | 0.00      | 0.00      | 0.00      | 0.00      | 0.00      | 0.00      | 0.00      | 0.00      | 0.00      | 0.00      | 0.00      | 0.00      | 0.00      | 0.00      | 0.00      | 0.00      |
| GT20       | 0.01      | 0.08      | 0.03      | 0.05      | 0.02      | 0.12      | 0.04      | 0.07      | 0.04      | 0.17      | 0.13      | 0.06      | 0.11      | 0.13      | 0.06      | 0.08      |
| PL9        | 0.00      | 0.13      | 0.05      | 0.16      | 0.10      | 0.16      | 0.04      | 0.05      | 0.07      | 0.05      | 0.10      | 0.08      | 0.08      | 0.12      | 0.08      | 0.20      |
| GH55       | 0.00      | 0.03      | 0.01      | 0.01      | 0.03      | 0.04      | 0.04      | 0.05      | 0.00      | 0.03      | 0.05      | 0.01      | 0.02      | 0.01      | 0.02      | 0.02      |
| GH64       | 0.00      | 0.00      | 0.00      | 0.00      | 0.00      | 0.00      | 0.00      | 0.00      | 0.00      | 0.00      | 0.02      | 0.00      | 0.00      | 0.00      | 0.00      | 0.00      |
| GH127      | 0.12      | 0.21      | 0.25      | 0.17      | 0.18      | 0.23      | 0.12      | 0.21      | 0.28      | 0.28      | 0.20      | 0.15      | 0.17      | 0.36      | 0.28      | 0.29      |
| GH103      | 0.06      | 0.00      | 0.00      | 0.00      | 0.01      | 0.00      | 0.04      | 0.00      | 0.00      | 0.02      | 0.00      | 0.00      | 0.00      | 0.02      | 0.00      | 0.00      |
| GH3        | 1.66      | 2.69      | 2.09      | 2.58      | 1.72      | 2.09      | 1.67      | 3.23      | 1.92      | 3.06      | 2.19      | 1.87      | 2.23      | 2.59      | 2.41      | 2.77      |
| GT45       | 0.00      | 0.00      | 0.00      | 0.00      | 0.00      | 0.00      | 0.00      | 0.00      | 0.00      | 0.00      | 0.00      | 0.00      | 0.00      | 0.00      | 0.00      | 0.00      |
| GT74       | 0.00      | 0.00      | 0.00      | 0.00      | 0.00      | 0.00      | 0.00      | 0.00      | 0.00      | 0.00      | 0.00      | 0.00      | 0.00      | 0.00      | 0.00      | 0.00      |
| GT90       | 0.00      | 0.00      | 0.00      | 0.00      | 0.00      | 0.00      | 0.00      | 0.00      | 0.00      | 0.00      | 0.02      | 0.00      | 0.00      | 0.00      | 0.00      | 0.00      |
| GH116      | 0.00      | 0.03      | 0.03      | 0.09      | 0.03      | 0.12      | 0.00      | 0.03      | 0.03      | 0.05      | 0.10      | 0.11      | 0.04      | 0.07      | 0.11      | 0.12      |
| GH31       | 0.48      | 1.23      | 1.01      | 1.12      | 0.64      | 0.92      | 0.91      | 0.91      | 0.84      | 1.05      | 0.79      | 0.84      | 0.99      | 1.02      | 1.13      | 1.09      |
| GT12       | 0.00      | 0.00      | 0.00      | 0.00      | 0.00      | 0.00      | 0.00      | 0.00      | 0.00      | 0.00      | 0.00      | 0.00      | 0.00      | 0.00      | 0.00      | 0.00      |
| CE1        | 0.22      | 0.32      | 0.26      | 0.37      | 0.24      | 0.41      | 0.21      | 0.38      | 0.25      | 0.48      | 0.24      | 0.28      | 0.34      | 0.37      | 0.38      | 0.45      |
| GH121      | 0.03      | 0.02      | 0.00      | 0.00      | 0.02      | 0.00      | 0.00      | 0.00      | 0.00      | 0.00      | 0.00      | 0.00      | 0.00      | 0.00      | 0.00      | 0.00      |
| GH79       | 0.00      | 0.00      | 0.00      | 0.01      | 0.01      | 0.00      | 0.04      | 0.00      | 0.00      | 0.00      | 0.02      | 0.00      | 0.00      | 0.00      | 0.00      | 0.00      |
| GT73       | 0.00      | 0.00      | 0.00      | 0.00      | 0.00      | 0.00      | 0.00      | 0.00      | 0.00      | 0.00      | 0.00      | 0.00      | 0.00      | 0.00      | 0.00      | 0.00      |
| GH77       | 0.55      | 0.62      | 0.55      | 0.52      | 0.71      | 0.23      | 0.50      | 0.32      | 0.57      | 0.33      | 0.64      | 0.55      | 0.30      | 0.43      | 0.43      | 0.31      |
| PL17       | 0.00      | 0.02      | 0.01      | 0.01      | 0.01      | 0.00      | 0.00      | 0.02      | 0.00      | 0.00      | 0.00      | 0.00      | 0.04      | 0.01      | 0.00      | 0.00      |
| PL8        | 0.06      | 0.40      | 0.15      | 0.46      | 0.14      | 0.41      | 0.08      | 0.48      | 0.23      | 0.37      | 0.34      | 0.38      | 0.30      | 0.37      | 0.34      | 0.63      |

## Normalized\_abundance\_2

| CAZY_group | CN-AD-103 | CN-AD-104 | CN-AD-105 | CN-AD-106 | CN-AD-107 | CN-AD-108 | CN-AD-109 | CN-AD-110 | CN-AD-111 | CN-AD-112 | CN-AD-113 | CN-AD-114 | CN-AD-115 | CN-AD-116 | CN-AD-117 | CN-AD-118 |
|------------|-----------|-----------|-----------|-----------|-----------|-----------|-----------|-----------|-----------|-----------|-----------|-----------|-----------|-----------|-----------|-----------|
| CE9        | 0.50      | 0.40      | 0.31      | 0.32      | 0.39      | 0.23      | 0.29      | 0.38      | 0.39      | 0.35      | 0.44      | 0.28      | 0.36      | 0.26      | 0.21      | 0.25      |
| CE15       | 0.00      | 0.00      | 0.01      | 0.02      | 0.00      | 0.02      | 0.00      | 0.00      | 0.01      | 0.00      | 0.02      | 0.02      | 0.00      | 0.02      | 0.02      | 0.03      |
| GT79       | 0.00      | 0.00      | 0.00      | 0.00      | 0.00      | 0.00      | 0.00      | 0.00      | 0.00      | 0.00      | 0.00      | 0.00      | 0.00      | 0.00      | 0.00      | 0.00      |
| GT10       | 0.00      | 0.00      | 0.00      | 0.00      | 0.00      | 0.00      | 0.00      | 0.02      | 0.01      | 0.02      | 0.02      | 0.00      | 0.00      | 0.01      | 0.02      | 0.02      |
| GH119      | 0.00      | 0.00      | 0.00      | 0.00      | 0.00      | 0.00      | 0.00      | 0.00      | 0.00      | 0.00      | 0.00      | 0.00      | 0.00      | 0.00      | 0.00      | 0.00      |
| GH16       | 0.04      | 0.29      | 0.14      | 0.22      | 0.16      | 0.31      | 0.06      | 0.27      | 0.22      | 0.37      | 0.32      | 0.10      | 0.27      | 0.24      | 0.17      | 0.34      |
| GH43       | 0.55      | 1.91      | 1.64      | 2.27      | 0.83      | 2.35      | 0.64      | 2.34      | 1.43      | 2.79      | 1.36      | 1.97      | 2.55      | 2.22      | 2.83      | 3.12      |
| GH51       | 0.22      | 0.57      | 0.38      | 0.55      | 0.30      | 0.47      | 0.35      | 0.63      | 0.53      | 0.59      | 0.61      | 0.36      | 0.61      | 0.59      | 0.38      | 0.48      |
| GT35       | 0.83      | 0.89      | 0.77      | 0.75      | 1.08      | 0.43      | 0.87      | 0.63      | 0.77      | 0.48      | 0.88      | 0.84      | 0.32      | 0.49      | 0.57      | 0.85      |
| GT25       | 0.06      | 0.00      | 0.00      | 0.00      | 0.01      | 0.02      | 0.00      | 0.00      | 0.00      | 0.00      | 0.00      | 0.01      | 0.00      | 0.00      | 0.00      | 0.00      |
| GT2        | 2.99      | 3.73      | 3.07      | 3.67      | 3.64      | 3.97      | 2.91      | 3.16      | 3.73      | 3.78      | 3.74      | 3.32      | 3.37      | 3.39      | 3.81      | 4.12      |
| GT51       | 1.09      | 0.81      | 0.63      | 0.56      | 0.78      | 0.72      | 0.76      | 0.67      | 0.83      | 0.89      | 0.64      | 0.67      | 0.72      | 0.86      | 0.58      | 0.68      |
| GH107      | 0.00      | 0.00      | 0.00      | 0.00      | 0.00      | 0.00      | 0.00      | 0.00      | 0.00      | 0.00      | 0.00      | 0.00      | 0.00      | 0.00      | 0.00      | 0.00      |
| GH7        | 0.00      | 0.00      | 0.00      | 0.00      | 0.00      | 0.00      | 0.00      | 0.00      | 0.00      | 0.00      | 0.00      | 0.00      | 0.00      | 0.00      | 0.00      | 0.00      |
| GT7        | 0.00      | 0.00      | 0.00      | 0.00      | 0.00      | 0.00      | 0.00      | 0.00      | 0.00      | 0.00      | 0.00      | 0.00      | 0.00      | 0.00      | 0.00      | 0.00      |
| GT36       | 0.00      | 0.00      | 0.00      | 0.00      | 0.00      | 0.00      | 0.00      | 0.00      | 0.00      | 0.00      | 0.00      | 0.00      | 0.00      | 0.00      | 0.00      | 0.00      |
| PL7        | 0.00      | 0.00      | 0.00      | 0.00      | 0.00      | 0.00      | 0.00      | 0.00      | 0.00      | 0.00      | 0.00      | 0.00      | 0.00      | 0.00      | 0.00      | 0.00      |
| GH110      | 0.00      | 0.11      | 0.08      | 0.07      | 0.06      | 0.18      | 0.02      | 0.07      | 0.16      | 0.13      | 0.15      | 0.08      | 0.17      | 0.14      | 0.11      | 0.15      |
| GT21       | 0.00      | 0.00      | 0.00      | 0.00      | 0.00      | 0.00      | 0.00      | 0.00      | 0.00      | 0.00      | 0.00      | 0.00      | 0.00      | 0.00      | 0.00      | 0.00      |
| GH62       | 0.00      | 0.00      | 0.00      | 0.00      | 0.00      | 0.00      | 0.00      | 0.00      | 0.00      | 0.00      | 0.00      | 0.00      | 0.00      | 0.00      | 0.00      | 0.00      |
| GH125      | 0.11      | 0.18      | 0.06      | 0.20      | 0.02      | 0.23      | 0.02      | 0.21      | 0.13      | 0.17      | 0.12      | 0.14      | 0.15      | 0.19      | 0.13      | 0.23      |
| GH117      | 0.00      | 0.08      | 0.07      | 0.14      | 0.10      | 0.10      | 0.02      | 0.10      | 0.09      | 0.13      | 0.15      | 0.06      | 0.08      | 0.10      | 0.06      | 0.11      |
| GH68       | 0.03      | 0.00      | 0.00      | 0.00      | 0.02      | 0.00      | 0.00      | 0.00      | 0.00      | 0.00      | 0.00      | 0.00      | 0.00      | 0.00      | 0.00      | 0.00      |
| GH85       | 0.11      | 0.00      | 0.02      | 0.04      | 0.00      | 0.00      | 0.00      | 0.07      | 0.02      | 0.00      | 0.00      | 0.01      | 0.00      | 0.01      | 0.00      | 0.02      |
| GH92       | 0.07      | 1.34      | 0.92      | 1.78      | 0.67      | 1.90      | 0.31      | 1.73      | 1.27      | 2.14      | 1.52      | 1.21      | 2.38      | 2.14      | 2.13      | 2.14      |
| GH40       | 0.00      | 0.00      | 0.00      | 0.00      | 0.00      | 0.00      | 0.00      | 0.00      | 0.00      | 0.00      | 0.00      | 0.00      | 0.00      | 0.00      | 0.00      | 0.00      |
| GT49       | 0.00      | 0.00      | 0.00      | 0.00      | 0.00      | 0.00      | 0.00      | 0.00      | 0.00      | 0.00      | 0.00      | 0.00      | 0.00      | 0.00      | 0.00      | 0.00      |
| GH112      | 0.25      | 0.21      | 0.21      | 0.21      | 0.27      | 0.06      | 0.12      | 0.07      | 0.20      | 0.03      | 0.17      | 0.12      | 0.06      | 0.07      | 0.13      | 0.15      |
| GT67       | 0.00      | 0.00      | 0.00      | 0.00      | 0.00      | 0.00      | 0.00      | 0.00      | 0.00      | 0.00      | 0.00      | 0.00      | 0.00      | 0.00      | 0.00      | 0.00      |
| CE8        | 0.03      | 0.29      | 0.19      | 0.19      | 0.15      | 0.20      | 0.08      | 0.22      | 0.17      | 0.23      | 0.13      | 0.14      | 0.29      | 0.21      | 0.21      | 0.22      |
| GT86       | 0.00      | 0.00      | 0.00      | 0.00      | 0.00      | 0.00      | 0.00      | 0.00      | 0.00      | 0.00      | 0.00      | 0.00      | 0.00      | 0.00      | 0.00      | 0.00      |
| GH101      | 0.10      | 0.00      | 0.00      | 0.01      | 0.01      | 0.00      | 0.02      | 0.00      | 0.06      | 0.00      | 0.02      | 0.03      | 0.00      | 0.00      | 0.00      | 0.02      |
| GH81       | 0.00      | 0.00      | 0.00      | 0.00      | 0.01      | 0.00      | 0.00      | 0.00      | 0.00      | 0.00      | 0.05      | 0.00      | 0.00      | 0.00      | 0.00      | 0.00      |
| GT93       | 0.00      | 0.00      | 0.00      | 0.00      | 0.00      | 0.00      | 0.00      | 0.00      | 0.00      | 0.00      | 0.00      | 0.00      | 0.00      | 0.00      | 0.00      | 0.00      |
| GT63       | 0.00      | 0.00      | 0.00      | 0.00      | 0.00      | 0.00      | 0.00      | 0.00      | 0.00      | 0.00      | 0.00      | 0.00      | 0.00      | 0.00      | 0.00      | 0.00      |
| CE11       | 0.18      | 0.16      | 0.14      | 0.17      | 0.24      | 0.27      | 0.14      | 0.14      | 0.19      | 0.22      | 0.20      | 0.14      | 0.27      | 0.31      | 0.25      | 0.25      |
| GT19       | 0.10      | 0.11      | 0.10      | 0.11      | 0.14      | 0.18      | 0.06      | 0.10      | 0.12      | 0.13      | 0.10      | 0.09      | 0.15      | 0.17      | 0.15      | 0.14      |
| GT33       | 0.00      | 0.00      | 0.00      | 0.00      | 0.00      | 0.00      | 0.00      | 0.00      | 0.00      | 0.00      | 0.00      | 0.00      | 0.00      | 0.00      | 0.00      | 0.00      |
| GH21       | 0.00      | 0.00      | 0.00      | 0.00      | 0.00      | 0.00      | 0.00      | 0.00      | 0.00      | 0.00      | 0.00      | 0.00      | 0.00      | 0.00      | 0.00      | 0.00      |
| GT68       | 0.00      | 0.00      | 0.00      | 0.00      | 0.00      | 0.00      | 0.00      | 0.00      | 0.00      | 0.00      | 0.00      | 0.00      | 0.00      | 0.00      | 0.00      | 0.00      |
| GH89       | 0.00      | 0.24      | 0.20      | 0.25      | 0.07      | 0.18      | 0.02      | 0.27      | 0.19      | 0.23      | 0.24      | 0.18      | 0.44      | 0.21      | 0.34      | 0.28      |
| GT82       | 0.00      | 0.00      | 0.00      | 0.00      | 0.01      | 0.00      | 0.00      | 0.00      | 0.00      | 0.00      | 0.00      | 0.00      | 0.00      | 0.00      | 0.00      | 0.00      |
| GH30       | 0.06      | 0.18      | 0.12      | 0.30      | 0.07      | 0.27      | 0.08      | 0.36      | 0.10      | 0.37      | 0.15      | 0.22      | 0.27      | 0.33      | 0.32      | 0.37      |
| GH20       | 0.39      | 0.96      | 0.66      | 1.09      | 0.71      | 1.21      | 0.31      | 1.08      | 1.04      | 1.19      | 1.15      | 0.92      | 1.31      | 1.18      | 0.96      | 1.25      |
| GH52       | 0.00      | 0.00      | 0.00      | 0.00      | 0.00      | 0.00      | 0.00      | 0.00      | 0.00      | 0.00      | 0.00      | 0.00      | 0.00      | 0.00      | 0.00      | 0.00      |
| GT84       | 0.00      | 0.00      | 0.01      | 0.00      | 0.02      | 0.00      | 0.00      | 0.00      | 0.00      | 0.00      | 0.03      | 0.01      | 0.00      | 0.00      | 0.00      | 0.00      |
| GT15       | 0.00      | 0.00      | 0.00      | 0.00      | 0.00      | 0.00      | 0.00      | 0.00      | 0.00      | 0.00      | 0.00      | 0.00      | 0.00      | 0.00      | 0.00      | 0.00      |
| GH93       | 0.00      | 0.00      | 0.00      | 0.00      | 0.00      | 0.02      | 0.00      | 0.00      | 0.01      | 0.02      | 0.00      | 0.00      | 0.02      | 0.00      | 0.02      | 0.00      |
| PL16       | 0.00      | 0.00      | 0.00      | 0.00      | 0.00      | 0.00      | 0.00      | 0.00      | 0.00      | 0.00      | 0.00      | 0.00      | 0.00      | 0.01      | 0.00      | 0.00      |
| GH26       | 0.01      | 0.02      | 0.16      | 0.06      | 0.05      | 0.08      | 0.06      | 0.24      | 0.06      | 0.15      | 0.07      | 0.11      | 0.02      | 0.10      | 0.06      | 0.06      |

## Normalized\_abundance\_2

| CAZY_group | CN-AD-103 | CN-AD-104 | CN-AD-105 | CN-AD-106 | CN-AD-107 | CN-AD-108 | CN-AD-109 | CN-AD-110 | CN-AD-111 | CN-AD-112 | CN-AD-113 | CN-AD-114 | CN-AD-115 | CN-AD-116 | CN-AD-117 | CN-AD-118 |
|------------|-----------|-----------|-----------|-----------|-----------|-----------|-----------|-----------|-----------|-----------|-----------|-----------|-----------|-----------|-----------|-----------|
| GT75       | 0.00      | 0.00      | 0.00      | 0.00      | 0.00      | 0.00      | 0.00      | 0.00      | 0.00      | 0.00      | 0.00      | 0.00      | 0.00      | 0.00      | 0.00      | 0.00      |
| GH53       | 0.07      | 0.05      | 0.16      | 0.09      | 0.16      | 0.16      | 0.06      | 0.10      | 0.03      | 0.08      | 0.10      | 0.03      | 0.10      | 0.07      | 0.06      | 0.06      |
| GT88       | 0.00      | 0.00      | 0.00      | 0.00      | 0.00      | 0.00      | 0.00      | 0.00      | 0.00      | 0.00      | 0.00      | 0.00      | 0.00      | 0.00      | 0.00      | 0.00      |
| GT24       | 0.00      | 0.00      | 0.00      | 0.00      | 0.00      | 0.00      | 0.00      | 0.00      | 0.00      | 0.00      | 0.00      | 0.00      | 0.00      | 0.00      | 0.00      | 0.00      |
| GT81       | 0.00      | 0.00      | 0.00      | 0.00      | 0.00      | 0.00      | 0.00      | 0.00      | 0.00      | 0.00      | 0.00      | 0.00      | 0.00      | 0.00      | 0.00      | 0.00      |
| GH4        | 0.26      | 0.18      | 0.08      | 0.12      | 0.15      | 0.10      | 0.29      | 0.00      | 0.13      | 0.15      | 0.12      | 0.09      | 0.08      | 0.12      | 0.08      | 0.11      |
| GT78       | 0.00      | 0.00      | 0.00      | 0.00      | 0.00      | 0.00      | 0.00      | 0.00      | 0.00      | 0.00      | 0.00      | 0.00      | 0.00      | 0.00      | 0.00      | 0.00      |
| GH8        | 0.06      | 0.00      | 0.05      | 0.09      | 0.05      | 0.02      | 0.04      | 0.05      | 0.01      | 0.05      | 0.02      | 0.07      | 0.04      | 0.09      | 0.06      | 0.09      |
| GH70       | 0.37      | 0.00      | 0.00      | 0.00      | 0.23      | 0.02      | 0.00      | 0.00      | 0.00      | 0.00      | 0.00      | 0.00      | 0.00      | 0.00      | 0.00      | 0.00      |
| GH122      | 0.00      | 0.00      | 0.00      | 0.00      | 0.00      | 0.00      | 0.00      | 0.00      | 0.00      | 0.00      | 0.00      | 0.00      | 0.00      | 0.00      | 0.00      | 0.00      |
| GH74       | 0.00      | 0.00      | 0.09      | 0.02      | 0.00      | 0.00      | 0.02      | 0.05      | 0.00      | 0.00      | 0.02      | 0.02      | 0.00      | 0.00      | 0.00      | 0.00      |
| GT41       | 0.01      | 0.00      | 0.00      | 0.01      | 0.02      | 0.00      | 0.00      | 0.00      | 0.00      | 0.02      | 0.00      | 0.01      | 0.00      | 0.00      | 0.00      | 0.03      |
| PL1        | 0.01      | 0.33      | 0.26      | 0.30      | 0.14      | 0.25      | 0.04      | 0.22      | 0.23      | 0.42      | 0.19      | 0.27      | 0.30      | 0.28      | 0.34      | 0.32      |
| GH15       | 0.00      | 0.03      | 0.02      | 0.04      | 0.01      | 0.02      | 0.00      | 0.02      | 0.02      | 0.07      | 0.02      | 0.05      | 0.04      | 0.06      | 0.00      | 0.02      |
| GH32       | 0.84      | 0.68      | 0.36      | 0.32      | 0.52      | 0.41      | 0.29      | 0.26      | 0.61      | 0.40      | 0.49      | 0.29      | 0.46      | 0.37      | 0.30      | 0.45      |
| GH44       | 0.00      | 0.00      | 0.01      | 0.00      | 0.00      | 0.00      | 0.04      | 0.02      | 0.00      | 0.00      | 0.00      | 0.04      | 0.00      | 0.00      | 0.00      | 0.00      |
| GT6        | 0.00      | 0.00      | 0.00      | 0.00      | 0.01      | 0.00      | 0.00      | 0.00      | 0.00      | 0.00      | 0.00      | 0.00      | 0.00      | 0.00      | 0.00      | 0.00      |
| GH13       | 3.36      | 2.69      | 2.47      | 2.21      | 3.55      | 2.07      | 2.19      | 2.07      | 2.86      | 1.72      | 2.39      | 2.17      | 1.31      | 2.00      | 1.49      | 1.75      |
| GT80       | 0.00      | 0.02      | 0.00      | 0.00      | 0.00      | 0.00      | 0.02      | 0.02      | 0.00      | 0.02      | 0.00      | 0.03      | 0.00      | 0.03      | 0.02      | 0.03      |
| GH71       | 0.00      | 0.00      | 0.00      | 0.00      | 0.00      | 0.00      | 0.00      | 0.00      | 0.00      | 0.00      | 0.00      | 0.00      | 0.00      | 0.00      | 0.00      | 0.00      |
| GH63       | 0.03      | 0.21      | 0.05      | 0.09      | 0.06      | 0.12      | 0.04      | 0.09      | 0.03      | 0.12      | 0.05      | 0.07      | 0.11      | 0.14      | 0.06      | 0.11      |
| PL21       | 0.00      | 0.03      | 0.00      | 0.07      | 0.05      | 0.00      | 0.00      | 0.03      | 0.02      | 0.05      | 0.07      | 0.08      | 0.04      | 0.06      | 0.04      | 0.06      |
| GH65       | 0.01      | 0.11      | 0.09      | 0.21      | 0.11      | 0.08      | 0.12      | 0.17      | 0.13      | 0.23      | 0.17      | 0.09      | 0.06      | 0.17      | 0.09      | 0.15      |
| CE4        | 0.65      | 0.59      | 0.55      | 0.45      | 0.68      | 0.37      | 0.35      | 0.43      | 0.58      | 0.47      | 0.47      | 0.47      | 0.34      | 0.39      | 0.49      | 0.31      |
| CE14       | 0.00      | 0.02      | 0.01      | 0.00      | 0.04      | 0.02      | 0.02      | 0.00      | 0.01      | 0.03      | 0.00      | 0.00      | 0.00      | 0.01      | 0.00      | 0.00      |
| GH115      | 0.03      | 0.18      | 0.25      | 0.25      | 0.08      | 0.10      | 0.10      | 0.34      | 0.13      | 0.40      | 0.17      | 0.26      | 0.29      | 0.33      | 0.34      | 0.37      |
| GH104      | 0.01      | 0.00      | 0.00      | 0.00      | 0.00      | 0.00      | 0.00      | 0.00      | 0.00      | 0.00      | 0.00      | 0.00      | 0.00      | 0.00      | 0.00      | 0.00      |
| GH111      | 0.00      | 0.00      | 0.00      | 0.00      | 0.00      | 0.00      | 0.00      | 0.00      | 0.00      | 0.00      | 0.00      | 0.00      | 0.00      | 0.00      | 0.00      | 0.00      |
| GH95       | 0.10      | 0.83      | 0.44      | 0.62      | 0.35      | 0.47      | 0.17      | 0.73      | 0.49      | 0.95      | 0.45      | 0.45      | 0.61      | 0.66      | 0.66      | 0.71      |
| GT70       | 0.00      | 0.00      | 0.00      | 0.00      | 0.00      | 0.00      | 0.00      | 0.00      | 0.00      | 0.00      | 0.00      | 0.00      | 0.00      | 0.00      | 0.00      | 0.00      |
| CE10       | 0.08      | 0.10      | 0.09      | 0.15      | 0.06      | 0.18      | 0.10      | 0.15      | 0.20      | 0.27      | 0.10      | 0.06      | 0.27      | 0.26      | 0.19      | 0.09      |
| GH10       | 0.00      | 0.10      | 0.17      | 0.15      | 0.07      | 0.02      | 0.02      | 0.31      | 0.10      | 0.13      | 0.05      | 0.14      | 0.10      | 0.13      | 0.13      | 0.11      |
| GH130      | 0.08      | 0.21      | 0.25      | 0.32      | 0.17      | 0.35      | 0.27      | 0.31      | 0.16      | 0.38      | 0.25      | 0.29      | 0.34      | 0.29      | 0.40      | 0.45      |
| PL20       | 0.00      | 0.00      | 0.00      | 0.00      | 0.00      | 0.00      | 0.00      | 0.00      | 0.00      | 0.00      | 0.00      | 0.00      | 0.00      | 0.00      | 0.00      | 0.00      |
| GH69       | 0.00      | 0.00      | 0.00      | 0.00      | 0.00      | 0.00      | 0.00      | 0.00      | 0.00      | 0.00      | 0.00      | 0.00      | 0.00      | 0.00      | 0.00      | 0.00      |
| PL2        | 0.00      | 0.00      | 0.00      | 0.00      | 0.00      | 0.00      | 0.00      | 0.00      | 0.00      | 0.00      | 0.00      | 0.00      | 0.00      | 0.00      | 0.00      | 0.00      |
| GH49       | 0.00      | 0.00      | 0.00      | 0.00      | 0.00      | 0.00      | 0.00      | 0.00      | 0.00      | 0.00      | 0.00      | 0.00      | 0.00      | 0.00      | 0.00      | 0.00      |
| GH25       | 0.61      | 0.37      | 0.36      | 0.34      | 0.42      | 0.45      | 0.45      | 0.34      | 0.39      | 0.20      | 0.29      | 0.33      | 0.11      | 0.16      | 0.23      | 0.28      |
| GH59       | 0.00      | 0.00      | 0.01      | 0.00      | 0.00      | 0.00      | 0.04      | 0.05      | 0.00      | 0.00      | 0.00      | 0.02      | 0.00      | 0.00      | 0.00      | 0.02      |
| GH35       | 0.19      | 0.30      | 0.29      | 0.37      | 0.12      | 0.37      | 0.12      | 0.60      | 0.42      | 0.59      | 0.51      | 0.41      | 0.44      | 0.37      | 0.43      | 0.49      |
| GT39       | 0.00      | 0.00      | 0.00      | 0.01      | 0.00      | 0.00      | 0.00      | 0.00      | 0.00      | 0.00      | 0.00      | 0.00      | 0.00      | 0.00      | 0.00      | 0.00      |
| GT57       | 0.00      | 0.00      | 0.00      | 0.00      | 0.00      | 0.00      | 0.00      | 0.00      | 0.00      | 0.00      | 0.00      | 0.00      | 0.00      | 0.00      | 0.00      | 0.00      |
| GH129      | 0.04      | 0.00      | 0.00      | 0.00      | 0.02      | 0.00      | 0.00      | 0.00      | 0.00      | 0.00      | 0.00      | 0.00      | 0.00      | 0.00      | 0.00      | 0.00      |
| GT22       | 0.00      | 0.00      | 0.00      | 0.00      | 0.00      | 0.00      | 0.00      | 0.00      | 0.00      | 0.00      | 0.00      | 0.00      | 0.00      | 0.00      | 0.00      | 0.00      |
| PL12       | 0.03      | 0.08      | 0.07      | 0.21      | 0.06      | 0.06      | 0.00      | 0.17      | 0.10      | 0.13      | 0.08      | 0.11      | 0.19      | 0.15      | 0.30      | 0.15      |
| PL18       | 0.00      | 0.00      | 0.00      | 0.00      | 0.00      | 0.00      | 0.00      | 0.00      | 0.00      | 0.00      | 0.00      | 0.00      | 0.00      | 0.00      | 0.00      | 0.00      |
| GT92       | 0.00      | 0.00      | 0.00      | 0.00      | 0.00      | 0.00      | 0.00      | 0.00      | 0.00      | 0.00      | 0.00      | 0.00      | 0.00      | 0.00      | 0.00      | 0.00      |
| GT44       | 0.00      | 0.00      | 0.00      | 0.01      | 0.00      | 0.00      | 0.00      | 0.00      | 0.00      | 0.00      | 0.00      | 0.00      | 0.00      | 0.00      | 0.00      | 0.00      |
| GT29       | 0.00      | 0.00      | 0.00      | 0.00      | 0.00      | 0.00      | 0.00      | 0.00      | 0.00      | 0.00      | 0.00      | 0.00      | 0.00      | 0.00      | 0.00      | 0.00      |
| GT13       | 0.00      | 0.00      | 0.00      | 0.00      | 0.00      | 0.00      | 0.00      | 0.00      | 0.00      | 0.00      | 0.00      | 0.00      | 0.00      | 0.00      | 0.00      | 0.00      |

Normalized\_abundance\_2

| CAZY_group | CN-AD-103 | CN-AD-104 | CN-AD-105 | CN-AD-106 | CN-AD-107 | CN-AD-108 | CN-AD-109 | CN-AD-110 | CN-AD-111 | CN-AD-112 | CN-AD-113 | CN-AD-114 | CN-AD-115 | CN-AD-116 | CN-AD-117 | CN-AD-118 |
|------------|-----------|-----------|-----------|-----------|-----------|-----------|-----------|-----------|-----------|-----------|-----------|-----------|-----------|-----------|-----------|-----------|
| GT52       | 0.00      | 0.00      | 0.00      | 0.00      | 0.00      | 0.00      | 0.00      | 0.00      | 0.00      | 0.00      | 0.00      | 0.00      | 0.00      | 0.00      | 0.00      | 0.00      |
| GT64       | 0.00      | 0.00      | 0.00      | 0.00      | 0.00      | 0.00      | 0.00      | 0.00      | 0.00      | 0.00      | 0.00      | 0.00      | 0.00      | 0.00      | 0.00      | 0.00      |
| GT85       | 0.00      | 0.00      | 0.00      | 0.00      | 0.00      | 0.00      | 0.00      | 0.00      | 0.00      | 0.00      | 0.00      | 0.00      | 0.00      | 0.00      | 0.00      | 0.00      |
| GT16       | 0.00      | 0.00      | 0.00      | 0.00      | 0.00      | 0.00      | 0.00      | 0.00      | 0.00      | 0.00      | 0.00      | 0.00      | 0.00      | 0.00      | 0.00      | 0.00      |
| GH56       | 0.00      | 0.00      | 0.00      | 0.00      | 0.00      | 0.00      | 0.00      | 0.00      | 0.00      | 0.00      | 0.00      | 0.00      | 0.00      | 0.00      | 0.00      | 0.00      |
| GT60       | 0.00      | 0.00      | 0.00      | 0.00      | 0.00      | 0.00      | 0.00      | 0.00      | 0.00      | 0.00      | 0.00      | 0.00      | 0.00      | 0.00      | 0.00      | 0.00      |
| GH41       | 0.00      | 0.00      | 0.00      | 0.00      | 0.00      | 0.00      | 0.00      | 0.00      | 0.00      | 0.00      | 0.00      | 0.00      | 0.00      | 0.00      | 0.00      | 0.00      |
| CE7        | 0.07      | 0.14      | 0.12      | 0.16      | 0.02      | 0.14      | 0.04      | 0.09      | 0.07      | 0.18      | 0.08      | 0.05      | 0.13      | 0.08      | 0.19      | 0.14      |
| GH39       | 0.08      | 0.02      | 0.05      | 0.04      | 0.02      | 0.06      | 0.04      | 0.05      | 0.01      | 0.03      | 0.02      | 0.03      | 0.00      | 0.02      | 0.00      | 0.02      |
| GT30       | 0.19      | 0.18      | 0.16      | 0.21      | 0.27      | 0.31      | 0.10      | 0.22      | 0.22      | 0.38      | 0.25      | 0.19      | 0.29      | 0.33      | 0.30      | 0.32      |
| PL15       | 0.00      | 0.10      | 0.11      | 0.11      | 0.03      | 0.04      | 0.02      | 0.17      | 0.08      | 0.20      | 0.03      | 0.09      | 0.15      | 0.14      | 0.21      | 0.08      |
| GH102      | 0.07      | 0.02      | 0.03      | 0.01      | 0.04      | 0.00      | 0.10      | 0.00      | 0.01      | 0.03      | 0.05      | 0.02      | 0.02      | 0.01      | 0.00      | 0.00      |

## Normalized\_abundance\_2

| CAZY_group | CN-AD-119 | CN-AD-120 | CN-AD-121 | CN-AD-122 | CN-AD-123 | CN-AD-124 | CN-AD-125 | CN-AD-126 | CN-AD-127 | CN-AD-128 | CN-AD-129 | CN-AD-130 | CN-AD-131 | CN-AD-132 | CN-AD-133 | CN-AD-134 |
|------------|-----------|-----------|-----------|-----------|-----------|-----------|-----------|-----------|-----------|-----------|-----------|-----------|-----------|-----------|-----------|-----------|
| GH29       | 0.86      | 0.55      | 0.69      | 0.20      | 0.33      | 0.37      | 0.58      | 1.23      | 0.34      | 0.82      | 0.90      | 0.65      | 0.75      | 0.87      | 0.93      | 0.72      |
| PL4        | 0.00      | 0.00      | 0.00      | 0.01      | 0.00      | 0.00      | 0.00      | 0.00      | 0.00      | 0.00      | 0.00      | 0.00      | 0.00      | 0.00      | 0.01      | 0.02      |
| GH23       | 0.87      | 1.00      | 1.00      | 0.92      | 0.88      | 1.01      | 0.97      | 1.04      | 0.88      | 0.87      | 1.22      | 0.98      | 0.86      | 1.09      | 1.02      | 1.15      |
| CE6        | 0.05      | 0.04      | 0.03      | 0.01      | 0.04      | 0.03      | 0.00      | 0.02      | 0.00      | 0.01      | 0.08      | 0.04      | 0.00      | 0.02      | 0.04      | 0.07      |
| GH72       | 0.05      | 0.10      | 0.12      | 0.05      | 0.09      | 0.10      | 0.11      | 0.04      | 0.06      | 0.07      | 0.10      | 0.09      | 0.09      | 0.00      | 0.06      | 0.05      |
| GH114      | 0.00      | 0.00      | 0.00      | 0.00      | 0.00      | 0.00      | 0.00      | 0.00      | 0.00      | 0.00      | 0.00      | 0.00      | 0.00      | 0.00      | 0.00      | 0.00      |
| GH78       | 1.21      | 0.66      | 1.00      | 0.46      | 0.59      | 0.54      | 0.49      | 0.83      | 0.34      | 0.84      | 0.76      | 0.30      | 0.86      | 1.08      | 0.99      | 0.52      |
| PL19       | 0.00      | 0.00      | 0.00      | 0.00      | 0.00      | 0.00      | 0.00      | 0.00      | 0.00      | 0.00      | 0.00      | 0.00      | 0.00      | 0.00      | 0.00      | 0.00      |
| GT27       | 0.00      | 0.00      | 0.00      | 0.00      | 0.00      | 0.00      | 0.00      | 0.00      | 0.00      | 0.00      | 0.00      | 0.00      | 0.00      | 0.00      | 0.00      | 0.00      |
| GH5        | 0.43      | 0.63      | 0.63      | 0.18      | 0.13      | 0.25      | 0.52      | 0.19      | 0.20      | 0.28      | 0.44      | 0.45      | 0.14      | 0.11      | 0.62      | 0.41      |
| GT40       | 0.00      | 0.00      | 0.00      | 0.00      | 0.00      | 0.00      | 0.00      | 0.00      | 0.00      | 0.00      | 0.00      | 0.00      | 0.00      | 0.00      | 0.00      | 0.00      |
| CE13       | 0.00      | 0.00      | 0.00      | 0.00      | 0.00      | 0.00      | 0.00      | 0.00      | 0.00      | 0.00      | 0.00      | 0.00      | 0.00      | 0.00      | 0.00      | 0.00      |
| GT37       | 0.00      | 0.00      | 0.00      | 0.00      | 0.00      | 0.00      | 0.00      | 0.00      | 0.00      | 0.00      | 0.00      | 0.00      | 0.00      | 0.00      | 0.00      | 0.00      |
| GH33       | 0.40      | 0.11      | 0.24      | 0.05      | 0.13      | 0.10      | 0.07      | 0.31      | 0.14      | 0.26      | 0.18      | 0.13      | 0.21      | 0.30      | 0.31      | 0.11      |
| GT65       | 0.00      | 0.00      | 0.00      | 0.00      | 0.00      | 0.00      | 0.00      | 0.00      | 0.00      | 0.00      | 0.00      | 0.00      | 0.00      | 0.00      | 0.00      | 0.00      |
| GH86       | 0.00      | 0.00      | 0.00      | 0.00      | 0.00      | 0.00      | 0.00      | 0.00      | 0.00      | 0.00      | 0.00      | 0.00      | 0.00      | 0.00      | 0.00      | 0.00      |
| GH123      | 0.14      | 0.08      | 0.03      | 0.03      | 0.09      | 0.03      | 0.07      | 0.21      | 0.02      | 0.14      | 0.13      | 0.06      | 0.16      | 0.25      | 0.13      | 0.09      |
| GH96       | 0.00      | 0.00      | 0.00      | 0.00      | 0.00      | 0.00      | 0.00      | 0.00      | 0.00      | 0.00      | 0.00      | 0.00      | 0.00      | 0.00      | 0.00      | 0.00      |
| GH14       | 0.00      | 0.00      | 0.00      | 0.00      | 0.00      | 0.00      | 0.00      | 0.00      | 0.00      | 0.00      | 0.00      | 0.00      | 0.00      | 0.00      | 0.00      | 0.00      |
| CE3        | 0.00      | 0.00      | 0.00      | 0.00      | 0.00      | 0.00      | 0.00      | 0.00      | 0.00      | 0.00      | 0.00      | 0.00      | 0.00      | 0.00      | 0.00      | 0.00      |
| PL10       | 0.16      | 0.19      | 0.12      | 0.03      | 0.04      | 0.01      | 0.13      | 0.19      | 0.02      | 0.07      | 0.18      | 0.00      | 0.12      | 0.11      | 0.21      | 0.14      |
| GT48       | 0.00      | 0.00      | 0.00      | 0.00      | 0.00      | 0.00      | 0.00      | 0.00      | 0.00      | 0.00      | 0.00      | 0.00      | 0.00      | 0.00      | 0.00      | 0.00      |
| PL6        | 0.00      | 0.01      | 0.00      | 0.00      | 0.00      | 0.00      | 0.00      | 0.00      | 0.00      | 0.01      | 0.00      | 0.00      | 0.00      | 0.00      | 0.00      | 0.00      |
| GT83       | 0.12      | 0.07      | 0.03      | 0.05      | 0.15      | 0.12      | 0.02      | 0.15      | 0.04      | 0.13      | 0.05      | 0.04      | 0.07      | 0.14      | 0.07      | 0.09      |
| GH126      | 0.00      | 0.00      | 0.00      | 0.00      | 0.00      | 0.00      | 0.00      | 0.00      | 0.00      | 0.00      | 0.00      | 0.00      | 0.00      | 0.00      | 0.00      | 0.00      |
| GH9        | 0.22      | 0.36      | 0.21      | 0.04      | 0.06      | 0.01      | 0.19      | 0.10      | 0.01      | 0.20      | 0.30      | 0.30      | 0.21      | 0.07      | 0.08      | 0.11      |
| GH75       | 0.00      | 0.00      | 0.00      | 0.00      | 0.00      | 0.00      | 0.00      | 0.00      | 0.00      | 0.00      | 0.00      | 0.00      | 0.00      | 0.00      | 0.00      | 0.00      |
| GT71       | 0.00      | 0.00      | 0.00      | 0.00      | 0.00      | 0.00      | 0.00      | 0.00      | 0.00      | 0.00      | 0.00      | 0.00      | 0.00      | 0.00      | 0.00      | 0.00      |
| GH46       | 0.00      | 0.00      | 0.00      | 0.00      | 0.00      | 0.00      | 0.00      | 0.00      | 0.00      | 0.00      | 0.00      | 0.00      | 0.00      | 0.00      | 0.00      | 0.00      |
| GT61       | 0.00      | 0.00      | 0.00      | 0.00      | 0.00      | 0.00      | 0.00      | 0.00      | 0.00      | 0.00      | 0.00      | 0.00      | 0.00      | 0.00      | 0.00      | 0.00      |
| GT3        | 0.15      | 0.11      | 0.09      | 0.01      | 0.06      | 0.04      | 0.09      | 0.13      | 0.01      | 0.11      | 0.28      | 0.20      | 0.07      | 0.09      | 0.16      | 0.14      |
| PL3        | 0.00      | 0.00      | 0.00      | 0.00      | 0.00      | 0.00      | 0.02      | 0.00      | 0.00      | 0.00      | 0.00      | 0.00      | 0.00      | 0.00      | 0.00      | 0.00      |
| GH108      | 0.05      | 0.03      | 0.00      | 0.01      | 0.02      | 0.01      | 0.02      | 0.02      | 0.02      | 0.04      | 0.03      | 0.02      | 0.09      | 0.04      | 0.03      | 0.02      |
| GT56       | 0.00      | 0.00      | 0.00      | 0.00      | 0.02      | 0.03      | 0.00      | 0.02      | 0.00      | 0.00      | 0.00      | 0.00      | 0.00      | 0.00      | 0.00      | 0.00      |
| PL11       | 0.24      | 0.10      | 0.27      | 0.07      | 0.04      | 0.03      | 0.15      | 0.19      | 0.06      | 0.13      | 0.18      | 0.04      | 0.17      | 0.05      | 0.21      | 0.29      |
| GH45       | 0.00      | 0.00      | 0.00      | 0.00      | 0.00      | 0.00      | 0.00      | 0.00      | 0.00      | 0.00      | 0.00      | 0.00      | 0.00      | 0.00      | 0.00      | 0.00      |
| GT34       | 0.00      | 0.00      | 0.00      | 0.00      | 0.00      | 0.00      | 0.00      | 0.00      | 0.00      | 0.00      | 0.00      | 0.00      | 0.00      | 0.00      | 0.00      | 0.00      |
| PL14       | 0.00      | 0.00      | 0.00      | 0.00      | 0.00      | 0.00      | 0.00      | 0.00      | 0.00      | 0.00      | 0.00      | 0.00      | 0.00      | 0.00      | 0.00      | 0.00      |
| GH19       | 0.01      | 0.01      | 0.00      | 0.01      | 0.00      | 0.03      | 0.00      | 0.00      | 0.00      | 0.01      | 0.00      | 0.02      | 0.00      | 0.00      | 0.01      | 0.02      |
| GH118      | 0.00      | 0.00      | 0.00      | 0.00      | 0.00      | 0.00      | 0.00      | 0.00      | 0.00      | 0.00      | 0.00      | 0.00      | 0.00      | 0.00      | 0.00      | 0.00      |
| GH82       | 0.00      | 0.00      | 0.00      | 0.00      | 0.00      | 0.00      | 0.00      | 0.00      | 0.00      | 0.00      | 0.00      | 0.00      | 0.00      | 0.00      | 0.00      | 0.00      |
| GH76       | 0.33      | 0.27      | 0.00      | 0.05      | 0.06      | 0.10      | 0.04      | 0.33      | 0.00      | 0.24      | 0.25      | 0.07      | 0.14      | 0.21      | 0.35      | 0.00      |
| GT4        | 1.87      | 1.74      | 1.66      | 1.08      | 1.03      | 1.59      | 1.72      | 2.23      | 1.49      | 1.66      | 2.02      | 1.19      | 1.78      | 1.82      | 2.05      | 1.47      |
| GT87       | 0.00      | 0.00      | 0.00      | 0.00      | 0.00      | 0.00      | 0.00      | 0.00      | 0.01      | 0.00      | 0.00      | 0.00      | 0.00      | 0.02      | 0.00      | 0.00      |
| GH24       | 0.12      | 0.10      | 0.09      | 0.12      | 0.17      | 0.21      | 0.17      | 0.25      | 0.02      | 0.10      | 0.21      | 0.15      | 0.31      | 0.25      | 0.13      | 0.16      |
| GH90       | 0.00      | 0.00      | 0.00      | 0.00      | 0.00      | 0.06      | 0.00      | 0.00      | 0.00      | 0.00      | 0.00      | 0.00      | 0.00      | 0.00      | 0.00      | 0.00      |
| GH57       | 0.14      | 0.12      | 0.06      | 0.04      | 0.06      | 0.07      | 0.13      | 0.06      | 0.01      | 0.11      | 0.16      | 0.13      | 0.05      | 0.09      | 0.11      | 0.09      |
| GH36       | 0.61      | 0.62      | 0.81      | 0.62      | 0.37      | 0.57      | 0.67      | 0.65      | 0.64      | 0.58      | 0.71      | 0.74      | 0.40      | 0.44      | 1.03      | 0.88      |
| GT46       | 0.00      | 0.00      | 0.00      | 0.00      | 0.00      | 0.00      | 0.00      | 0.00      | 0.00      | 0.00      | 0.00      | 0.00      | 0.00      | 0.00      | 0.00      | 0.00      |
| GH66       | 0.06      | 0.01      | 0.12      | 0.01      | 0.00      | 0.01      | 0.02      | 0.08      | 0.02      | 0.04      | 0.05      | 0.02      | 0.00      | 0.02      | 0.06      | 0.00      |

Normalized\_abundance\_2

| CAZY_group   | CN-AD-119 | CN-AD-120 | CN-AD-121 | CN-AD-122 | CN-AD-123 | CN-AD-124 | CN-AD-125 | CN-AD-126 | CN-AD-127 | CN-AD-128 | CN-AD-129 | CN-AD-130 | CN-AD-131 | CN-AD-132 | CN-AD-133 | CN-AD-134 |
|--------------|-----------|-----------|-----------|-----------|-----------|-----------|-----------|-----------|-----------|-----------|-----------|-----------|-----------|-----------|-----------|-----------|
| <b>GH48</b>  | 0.00      | 0.00      | 0.03      | 0.00      | 0.00      | 0.00      | 0.00      | 0.02      | 0.00      | 0.00      | 0.00      | 0.00      | 0.00      | 0.00      | 0.00      | 0.00      |
| <b>GT53</b>  | 0.00      | 0.00      | 0.00      | 0.00      | 0.00      | 0.00      | 0.00      | 0.00      | 0.00      | 0.00      | 0.00      | 0.00      | 0.00      | 0.00      | 0.00      | 0.00      |
| <b>GH60</b>  | 0.00      | 0.00      | 0.00      | 0.00      | 0.00      | 0.00      | 0.00      | 0.00      | 0.00      | 0.00      | 0.00      | 0.00      | 0.00      | 0.00      | 0.00      | 0.00      |
| <b>GT31</b>  | 0.00      | 0.00      | 0.00      | 0.00      | 0.02      | 0.01      | 0.00      | 0.00      | 0.00      | 0.00      | 0.00      | 0.00      | 0.00      | 0.00      | 0.00      | 0.00      |
| <b>GH105</b> | 0.82      | 0.38      | 0.39      | 0.17      | 0.18      | 0.32      | 0.43      | 0.73      | 0.26      | 0.54      | 0.84      | 0.33      | 0.82      | 0.55      | 1.05      | 0.47      |
| <b>GT23</b>  | 0.00      | 0.00      | 0.03      | 0.00      | 0.00      | 0.00      | 0.02      | 0.00      | 0.01      | 0.00      | 0.02      | 0.00      | 0.03      | 0.00      | 0.01      | 0.02      |
| <b>GH11</b>  | 0.00      | 0.00      | 0.00      | 0.00      | 0.00      | 0.00      | 0.00      | 0.00      | 0.00      | 0.00      | 0.00      | 0.00      | 0.00      | 0.00      | 0.00      | 0.00      |
| <b>GT38</b>  | 0.00      | 0.00      | 0.00      | 0.00      | 0.00      | 0.00      | 0.00      | 0.00      | 0.00      | 0.00      | 0.00      | 0.00      | 0.00      | 0.00      | 0.00      | 0.00      |
| <b>GT43</b>  | 0.00      | 0.00      | 0.00      | 0.00      | 0.00      | 0.00      | 0.00      | 0.00      | 0.00      | 0.00      | 0.00      | 0.00      | 0.00      | 0.00      | 0.00      | 0.00      |
| <b>GH99</b>  | 0.00      | 0.00      | 0.00      | 0.00      | 0.00      | 0.01      | 0.00      | 0.00      | 0.00      | 0.03      | 0.02      | 0.00      | 0.00      | 0.02      | 0.01      | 0.00      |
| <b>GH38</b>  | 0.30      | 0.26      | 0.21      | 0.13      | 0.15      | 0.21      | 0.09      | 0.27      | 0.06      | 0.16      | 0.23      | 0.11      | 0.17      | 0.21      | 0.24      | 0.14      |
| <b>GH109</b> | 0.22      | 0.18      | 0.21      | 0.07      | 0.09      | 0.07      | 0.32      | 0.37      | 0.09      | 0.30      | 0.26      | 0.22      | 0.24      | 0.25      | 0.35      | 0.18      |
| <b>GH2</b>   | 5.47      | 3.38      | 3.59      | 2.09      | 2.64      | 2.70      | 2.83      | 4.87      | 1.80      | 4.25      | 4.29      | 2.69      | 3.56      | 4.55      | 4.80      | 3.66      |
| <b>GT28</b>  | 0.32      | 0.30      | 0.39      | 0.34      | 0.26      | 0.44      | 0.34      | 0.31      | 0.43      | 0.27      | 0.35      | 0.35      | 0.37      | 0.26      | 0.35      | 0.52      |
| <b>GH42</b>  | 0.16      | 0.12      | 0.12      | 0.28      | 0.09      | 0.54      | 0.22      | 0.00      | 0.26      | 0.09      | 0.16      | 0.09      | 0.05      | 0.07      | 0.14      | 0.32      |
| <b>GT58</b>  | 0.00      | 0.00      | 0.00      | 0.00      | 0.00      | 0.00      | 0.00      | 0.00      | 0.00      | 0.00      | 0.00      | 0.00      | 0.00      | 0.00      | 0.00      | 0.00      |
| <b>GH61</b>  | 0.00      | 0.00      | 0.00      | 0.00      | 0.00      | 0.00      | 0.00      | 0.00      | 0.00      | 0.00      | 0.00      | 0.00      | 0.00      | 0.00      | 0.00      | 0.00      |
| <b>GH80</b>  | 0.00      | 0.00      | 0.00      | 0.00      | 0.00      | 0.00      | 0.00      | 0.00      | 0.00      | 0.00      | 0.00      | 0.00      | 0.00      | 0.00      | 0.00      | 0.00      |
| <b>GH98</b>  | 0.01      | 0.00      | 0.00      | 0.00      | 0.00      | 0.00      | 0.00      | 0.00      | 0.00      | 0.00      | 0.03      | 0.02      | 0.03      | 0.00      | 0.00      | 0.00      |
| <b>GH6</b>   | 0.00      | 0.00      | 0.00      | 0.00      | 0.00      | 0.00      | 0.00      | 0.00      | 0.00      | 0.00      | 0.00      | 0.00      | 0.00      | 0.00      | 0.00      | 0.00      |
| <b>GT1</b>   | 0.00      | 0.04      | 0.03      | 0.01      | 0.02      | 0.07      | 0.02      | 0.02      | 0.07      | 0.00      | 0.00      | 0.00      | 0.03      | 0.02      | 0.01      | 0.02      |
| <b>GH28</b>  | 1.09      | 0.66      | 0.72      | 0.24      | 0.42      | 0.57      | 0.51      | 0.71      | 0.50      | 0.75      | 1.23      | 0.45      | 0.87      | 0.69      | 0.98      | 0.72      |
| <b>GT42</b>  | 0.00      | 0.00      | 0.00      | 0.00      | 0.00      | 0.00      | 0.00      | 0.00      | 0.00      | 0.00      | 0.00      | 0.00      | 0.00      | 0.00      | 0.00      | 0.00      |
| <b>GH128</b> | 0.00      | 0.00      | 0.00      | 0.00      | 0.00      | 0.00      | 0.00      | 0.00      | 0.00      | 0.00      | 0.00      | 0.00      | 0.00      | 0.00      | 0.00      | 0.00      |
| <b>CE12</b>  | 0.19      | 0.12      | 0.15      | 0.05      | 0.06      | 0.12      | 0.13      | 0.10      | 0.14      | 0.11      | 0.21      | 0.13      | 0.10      | 0.07      | 0.13      | 0.18      |
| <b>CE16</b>  | 0.00      | 0.00      | 0.00      | 0.00      | 0.00      | 0.00      | 0.00      | 0.00      | 0.00      | 0.00      | 0.00      | 0.00      | 0.00      | 0.00      | 0.00      | 0.00      |
| <b>GT89</b>  | 0.00      | 0.00      | 0.00      | 0.00      | 0.00      | 0.00      | 0.00      | 0.00      | 0.00      | 0.00      | 0.00      | 0.00      | 0.00      | 0.00      | 0.00      | 0.00      |
| <b>GT11</b>  | 0.02      | 0.04      | 0.06      | 0.03      | 0.02      | 0.06      | 0.11      | 0.06      | 0.03      | 0.06      | 0.10      | 0.02      | 0.05      | 0.05      | 0.10      | 0.11      |
| <b>GT77</b>  | 0.01      | 0.00      | 0.00      | 0.00      | 0.02      | 0.01      | 0.00      | 0.00      | 0.00      | 0.01      | 0.00      | 0.00      | 0.02      | 0.02      | 0.00      | 0.02      |
| <b>GT55</b>  | 0.00      | 0.00      | 0.00      | 0.00      | 0.00      | 0.00      | 0.00      | 0.00      | 0.00      | 0.00      | 0.00      | 0.00      | 0.00      | 0.00      | 0.00      | 0.00      |
| <b>GT18</b>  | 0.00      | 0.00      | 0.00      | 0.00      | 0.00      | 0.00      | 0.00      | 0.00      | 0.00      | 0.00      | 0.00      | 0.00      | 0.00      | 0.00      | 0.00      | 0.00      |
| <b>GH87</b>  | 0.02      | 0.00      | 0.00      | 0.00      | 0.00      | 0.01      | 0.00      | 0.00      | 0.04      | 0.00      | 0.00      | 0.00      | 0.00      | 0.00      | 0.01      | 0.00      |
| <b>PL5</b>   | 0.00      | 0.00      | 0.00      | 0.00      | 0.00      | 0.00      | 0.00      | 0.00      | 0.00      | 0.00      | 0.00      | 0.00      | 0.00      | 0.00      | 0.00      | 0.00      |
| <b>GH22</b>  | 0.00      | 0.00      | 0.00      | 0.00      | 0.00      | 0.00      | 0.00      | 0.00      | 0.00      | 0.00      | 0.00      | 0.00      | 0.00      | 0.00      | 0.00      | 0.00      |
| <b>CE2</b>   | 0.07      | 0.08      | 0.00      | 0.04      | 0.06      | 0.01      | 0.02      | 0.02      | 0.03      | 0.03      | 0.10      | 0.09      | 0.02      | 0.02      | 0.07      | 0.05      |
| <b>GH120</b> | 0.00      | 0.05      | 0.00      | 0.08      | 0.02      | 0.07      | 0.02      | 0.00      | 0.08      | 0.03      | 0.08      | 0.06      | 0.07      | 0.00      | 0.06      | 0.18      |
| <b>GH73</b>  | 0.29      | 0.48      | 0.57      | 0.42      | 0.31      | 0.40      | 0.37      | 0.29      | 0.53      | 0.24      | 0.39      | 0.48      | 0.47      | 0.28      | 0.44      | 0.38      |
| <b>GT17</b>  | 0.00      | 0.00      | 0.00      | 0.00      | 0.00      | 0.00      | 0.02      | 0.00      | 0.00      | 0.00      | 0.00      | 0.00      | 0.00      | 0.00      | 0.00      | 0.00      |
| <b>GH124</b> | 0.00      | 0.00      | 0.00      | 0.00      | 0.00      | 0.00      | 0.00      | 0.00      | 0.00      | 0.00      | 0.00      | 0.00      | 0.00      | 0.00      | 0.00      | 0.00      |
| <b>GH54</b>  | 0.00      | 0.00      | 0.00      | 0.00      | 0.00      | 0.00      | 0.00      | 0.00      | 0.00      | 0.00      | 0.00      | 0.00      | 0.00      | 0.00      | 0.00      | 0.00      |
| <b>GH100</b> | 0.00      | 0.00      | 0.00      | 0.00      | 0.00      | 0.00      | 0.00      | 0.00      | 0.00      | 0.00      | 0.00      | 0.00      | 0.00      | 0.00      | 0.00      | 0.00      |
| <b>GH113</b> | 0.00      | 0.07      | 0.00      | 0.01      | 0.02      | 0.00      | 0.02      | 0.00      | 0.02      | 0.00      | 0.03      | 0.06      | 0.00      | 0.00      | 0.04      | 0.07      |
| <b>GT5</b>   | 0.24      | 0.34      | 0.48      | 0.45      | 0.17      | 0.44      | 0.41      | 0.21      | 0.57      | 0.21      | 0.30      | 0.28      | 0.31      | 0.35      | 0.35      | 0.56      |
| <b>GH94</b>  | 0.26      | 0.54      | 0.45      | 0.40      | 0.11      | 0.40      | 0.60      | 0.21      | 0.41      | 0.30      | 0.48      | 0.43      | 0.33      | 0.11      | 0.57      | 0.68      |
| <b>GT66</b>  | 0.00      | 0.00      | 0.00      | 0.00      | 0.00      | 0.00      | 0.00      | 0.00      | 0.00      | 0.00      | 0.00      | 0.00      | 0.00      | 0.00      | 0.00      | 0.00      |
| <b>GT94</b>  | 0.00      | 0.00      | 0.00      | 0.00      | 0.00      | 0.00      | 0.00      | 0.00      | 0.00      | 0.00      | 0.00      | 0.00      | 0.00      | 0.00      | 0.00      | 0.00      |
| <b>GH58</b>  | 0.00      | 0.00      | 0.00      | 0.00      | 0.00      | 0.03      | 0.00      | 0.00      | 0.00      | 0.00      | 0.00      | 0.00      | 0.00      | 0.00      | 0.00      | 0.00      |
| <b>GH1</b>   | 0.16      | 0.27      | 0.87      | 0.75      | 0.42      | 1.16      | 0.34      | 0.52      | 1.20      | 0.23      | 0.38      | 0.37      | 0.23      | 0.32      | 0.24      | 0.43      |
| <b>PL22</b>  | 0.01      | 0.00      | 0.00      | 0.00      | 0.00      | 0.03      | 0.00      | 0.00      | 0.00      | 0.00      | 0.00      | 0.00      | 0.00      | 0.00      | 0.00      | 0.00      |
| <b>GT9</b>   | 0.15      | 0.10      | 0.12      | 0.04      | 0.20      | 0.15      | 0.07      | 0.19      | 0.03      | 0.13      | 0.13      | 0.07      | 0.23      | 0.19      | 0.13      | 0.14      |



Normalized\_abundance\_2

| CAZY_group | CN-AD-119 | CN-AD-120 | CN-AD-121 | CN-AD-122 | CN-AD-123 | CN-AD-124 | CN-AD-125 | CN-AD-126 | CN-AD-127 | CN-AD-128 | CN-AD-129 | CN-AD-130 | CN-AD-131 | CN-AD-132 | CN-AD-133 | CN-AD-134 |
|------------|-----------|-----------|-----------|-----------|-----------|-----------|-----------|-----------|-----------|-----------|-----------|-----------|-----------|-----------|-----------|-----------|
| GT76       | 0.00      | 0.00      | 0.00      | 0.00      | 0.00      | 0.00      | 0.00      | 0.00      | 0.00      | 0.00      | 0.00      | 0.00      | 0.00      | 0.00      | 0.00      | 0.00      |
| GT32       | 0.04      | 0.11      | 0.00      | 0.03      | 0.09      | 0.07      | 0.06      | 0.10      | 0.04      | 0.14      | 0.15      | 0.09      | 0.10      | 0.07      | 0.07      | 0.05      |
| GT47       | 0.00      | 0.03      | 0.06      | 0.05      | 0.00      | 0.06      | 0.02      | 0.00      | 0.04      | 0.01      | 0.00      | 0.00      | 0.00      | 0.04      | 0.04      | 0.02      |
| GH84       | 0.11      | 0.05      | 0.09      | 0.08      | 0.09      | 0.03      | 0.09      | 0.19      | 0.04      | 0.09      | 0.15      | 0.15      | 0.16      | 0.18      | 0.17      | 0.09      |
| GH83       | 0.00      | 0.00      | 0.00      | 0.00      | 0.00      | 0.00      | 0.00      | 0.00      | 0.00      | 0.00      | 0.00      | 0.00      | 0.00      | 0.00      | 0.00      | 0.00      |
| GT59       | 0.00      | 0.00      | 0.00      | 0.00      | 0.00      | 0.00      | 0.00      | 0.00      | 0.00      | 0.00      | 0.00      | 0.00      | 0.00      | 0.00      | 0.00      | 0.00      |
| GH34       | 0.00      | 0.00      | 0.00      | 0.00      | 0.00      | 0.00      | 0.00      | 0.00      | 0.00      | 0.00      | 0.00      | 0.00      | 0.00      | 0.00      | 0.00      | 0.00      |
| GT14       | 0.05      | 0.03      | 0.00      | 0.01      | 0.00      | 0.00      | 0.04      | 0.02      | 0.01      | 0.06      | 0.07      | 0.02      | 0.03      | 0.09      | 0.04      | 0.07      |
| GH47       | 0.00      | 0.00      | 0.00      | 0.00      | 0.00      | 0.00      | 0.00      | 0.00      | 0.00      | 0.00      | 0.00      | 0.00      | 0.00      | 0.00      | 0.00      | 0.00      |
| GH97       | 1.45      | 0.96      | 0.60      | 0.20      | 0.63      | 0.25      | 0.45      | 0.87      | 0.10      | 0.88      | 1.22      | 0.37      | 0.61      | 0.90      | 0.95      | 0.47      |
| GH50       | 0.07      | 0.04      | 0.00      | 0.01      | 0.00      | 0.03      | 0.00      | 0.00      | 0.00      | 0.01      | 0.08      | 0.00      | 0.00      | 0.02      | 0.06      | 0.00      |
| GT26       | 0.17      | 0.18      | 0.30      | 0.11      | 0.06      | 0.16      | 0.22      | 0.25      | 0.11      | 0.17      | 0.16      | 0.17      | 0.14      | 0.19      | 0.14      | 0.23      |
| GH18       | 0.51      | 0.44      | 0.39      | 0.42      | 0.52      | 0.54      | 0.34      | 0.58      | 0.37      | 0.60      | 0.44      | 0.48      | 0.40      | 0.56      | 0.85      | 0.25      |
| GH37       | 0.00      | 0.01      | 0.00      | 0.00      | 0.07      | 0.06      | 0.00      | 0.00      | 0.00      | 0.00      | 0.00      | 0.00      | 0.00      | 0.00      | 0.00      | 0.00      |
| PL13       | 0.11      | 0.05      | 0.00      | 0.01      | 0.00      | 0.00      | 0.00      | 0.08      | 0.00      | 0.06      | 0.05      | 0.00      | 0.02      | 0.02      | 0.06      | 0.00      |
| GH27       | 0.26      | 0.21      | 0.27      | 0.11      | 0.17      | 0.09      | 0.15      | 0.29      | 0.13      | 0.26      | 0.18      | 0.13      | 0.14      | 0.28      | 0.24      | 0.20      |
| GT54       | 0.00      | 0.00      | 0.00      | 0.00      | 0.00      | 0.00      | 0.00      | 0.00      | 0.00      | 0.00      | 0.00      | 0.00      | 0.00      | 0.00      | 0.00      | 0.00      |
| GT91       | 0.00      | 0.00      | 0.00      | 0.00      | 0.00      | 0.00      | 0.00      | 0.00      | 0.00      | 0.00      | 0.00      | 0.00      | 0.00      | 0.00      | 0.00      | 0.00      |
| GT72       | 0.00      | 0.00      | 0.00      | 0.00      | 0.00      | 0.00      | 0.00      | 0.00      | 0.00      | 0.00      | 0.00      | 0.00      | 0.00      | 0.00      | 0.00      | 0.00      |
| GH67       | 0.09      | 0.08      | 0.12      | 0.01      | 0.04      | 0.03      | 0.00      | 0.12      | 0.02      | 0.04      | 0.10      | 0.06      | 0.03      | 0.04      | 0.13      | 0.07      |
| GH12       | 0.00      | 0.00      | 0.00      | 0.00      | 0.00      | 0.00      | 0.00      | 0.00      | 0.00      | 0.00      | 0.00      | 0.00      | 0.00      | 0.00      | 0.00      | 0.00      |
| GH91       | 0.01      | 0.04      | 0.00      | 0.03      | 0.02      | 0.01      | 0.00      | 0.00      | 0.01      | 0.01      | 0.00      | 0.00      | 0.00      | 0.05      | 0.01      | 0.00      |
| GT69       | 0.00      | 0.00      | 0.00      | 0.00      | 0.00      | 0.00      | 0.00      | 0.00      | 0.00      | 0.00      | 0.00      | 0.00      | 0.00      | 0.00      | 0.00      | 0.00      |
| GH106      | 0.36      | 0.12      | 0.18      | 0.07      | 0.11      | 0.07      | 0.11      | 0.31      | 0.07      | 0.16      | 0.35      | 0.07      | 0.24      | 0.34      | 0.41      | 0.18      |
| GT62       | 0.00      | 0.00      | 0.00      | 0.00      | 0.00      | 0.00      | 0.00      | 0.00      | 0.00      | 0.00      | 0.00      | 0.00      | 0.00      | 0.00      | 0.00      | 0.00      |
| GH17       | 0.00      | 0.00      | 0.00      | 0.00      | 0.00      | 0.00      | 0.00      | 0.00      | 0.00      | 0.00      | 0.00      | 0.00      | 0.00      | 0.00      | 0.00      | 0.00      |
| GH88       | 0.63      | 0.38      | 0.21      | 0.22      | 0.26      | 0.10      | 0.21      | 0.60      | 0.08      | 0.45      | 0.43      | 0.09      | 0.37      | 0.30      | 0.44      | 0.23      |
| CE5        | 0.00      | 0.00      | 0.00      | 0.00      | 0.00      | 0.00      | 0.00      | 0.00      | 0.00      | 0.00      | 0.00      | 0.00      | 0.00      | 0.00      | 0.00      | 0.00      |
| GT8        | 0.09      | 0.14      | 0.12      | 0.03      | 0.04      | 0.15      | 0.09      | 0.04      | 0.14      | 0.09      | 0.07      | 0.09      | 0.02      | 0.09      | 0.07      | 0.09      |
| GT50       | 0.00      | 0.00      | 0.00      | 0.00      | 0.00      | 0.00      | 0.00      | 0.00      | 0.00      | 0.00      | 0.00      | 0.00      | 0.00      | 0.00      | 0.00      | 0.00      |
| GT20       | 0.07      | 0.05      | 0.06      | 0.04      | 0.07      | 0.07      | 0.06      | 0.08      | 0.01      | 0.09      | 0.08      | 0.02      | 0.09      | 0.07      | 0.10      | 0.02      |
| PL9        | 0.06      | 0.04      | 0.06      | 0.07      | 0.06      | 0.23      | 0.07      | 0.08      | 0.10      | 0.16      | 0.13      | 0.06      | 0.03      | 0.11      | 0.13      | 0.09      |
| GH55       | 0.05      | 0.04      | 0.00      | 0.04      | 0.00      | 0.01      | 0.06      | 0.02      | 0.01      | 0.01      | 0.03      | 0.06      | 0.02      | 0.00      | 0.00      | 0.07      |
| GH64       | 0.00      | 0.00      | 0.00      | 0.00      | 0.00      | 0.00      | 0.00      | 0.00      | 0.00      | 0.00      | 0.00      | 0.00      | 0.00      | 0.00      | 0.00      | 0.00      |
| GH127      | 0.40      | 0.27      | 0.21      | 0.13      | 0.18      | 0.13      | 0.21      | 0.31      | 0.14      | 0.26      | 0.33      | 0.20      | 0.30      | 0.30      | 0.35      | 0.38      |
| GH103      | 0.00      | 0.00      | 0.00      | 0.00      | 0.04      | 0.03      | 0.00      | 0.02      | 0.00      | 0.01      | 0.00      | 0.00      | 0.00      | 0.00      | 0.00      | 0.00      |
| GH3        | 3.20      | 2.58      | 2.35      | 1.66      | 1.62      | 2.13      | 2.26      | 2.87      | 1.98      | 2.61      | 2.47      | 1.67      | 1.94      | 2.35      | 3.07      | 2.37      |
| GT45       | 0.00      | 0.00      | 0.00      | 0.00      | 0.00      | 0.00      | 0.00      | 0.00      | 0.00      | 0.00      | 0.00      | 0.00      | 0.00      | 0.00      | 0.00      | 0.00      |
| GT74       | 0.00      | 0.00      | 0.00      | 0.00      | 0.00      | 0.00      | 0.00      | 0.00      | 0.00      | 0.00      | 0.00      | 0.00      | 0.00      | 0.00      | 0.00      | 0.00      |
| GT90       | 0.00      | 0.00      | 0.00      | 0.00      | 0.00      | 0.00      | 0.00      | 0.00      | 0.00      | 0.00      | 0.00      | 0.00      | 0.00      | 0.00      | 0.00      | 0.00      |
| GH116      | 0.06      | 0.07      | 0.00      | 0.05      | 0.02      | 0.03      | 0.13      | 0.10      | 0.01      | 0.06      | 0.18      | 0.04      | 0.10      | 0.11      | 0.03      | 0.00      |
| GH31       | 0.99      | 1.00      | 0.94      | 0.62      | 0.74      | 0.81      | 0.95      | 1.02      | 0.69      | 0.91      | 0.92      | 0.63      | 1.03      | 1.01      | 1.15      | 0.93      |
| GT12       | 0.00      | 0.00      | 0.00      | 0.00      | 0.00      | 0.00      | 0.00      | 0.00      | 0.00      | 0.00      | 0.00      | 0.00      | 0.00      | 0.00      | 0.00      | 0.00      |
| CE1        | 0.42      | 0.37      | 0.21      | 0.15      | 0.26      | 0.19      | 0.32      | 0.38      | 0.17      | 0.16      | 0.38      | 0.19      | 0.37      | 0.37      | 0.27      | 0.32      |
| GH121      | 0.00      | 0.00      | 0.06      | 0.01      | 0.00      | 0.00      | 0.00      | 0.00      | 0.00      | 0.00      | 0.00      | 0.00      | 0.00      | 0.00      | 0.00      | 0.02      |
| GH79       | 0.02      | 0.00      | 0.00      | 0.00      | 0.00      | 0.00      | 0.00      | 0.00      | 0.00      | 0.03      | 0.02      | 0.00      | 0.00      | 0.00      | 0.01      | 0.00      |
| GT73       | 0.00      | 0.00      | 0.00      | 0.00      | 0.00      | 0.03      | 0.00      | 0.00      | 0.00      | 0.00      | 0.00      | 0.00      | 0.00      | 0.00      | 0.00      | 0.00      |
| GH77       | 0.47      | 0.48      | 0.72      | 0.48      | 0.33      | 0.57      | 0.49      | 0.48      | 0.70      | 0.48      | 0.54      | 0.54      | 0.40      | 0.55      | 0.54      | 0.52      |
| PL17       | 0.00      | 0.01      | 0.00      | 0.00      | 0.02      | 0.01      | 0.04      | 0.02      | 0.02      | 0.03      | 0.02      | 0.00      | 0.00      | 0.00      | 0.00      | 0.00      |
| PL8        | 0.53      | 0.38      | 0.15      | 0.07      | 0.18      | 0.13      | 0.09      | 0.50      | 0.02      | 0.60      | 0.30      | 0.11      | 0.28      | 0.30      | 0.41      | 0.20      |

## Normalized\_abundance\_2

| CAZY_group | CN-AD-119 | CN-AD-120 | CN-AD-121 | CN-AD-122 | CN-AD-123 | CN-AD-124 | CN-AD-125 | CN-AD-126 | CN-AD-127 | CN-AD-128 | CN-AD-129 | CN-AD-130 | CN-AD-131 | CN-AD-132 | CN-AD-133 | CN-AD-134 |
|------------|-----------|-----------|-----------|-----------|-----------|-----------|-----------|-----------|-----------|-----------|-----------|-----------|-----------|-----------|-----------|-----------|
| CE9        | 0.27      | 0.29      | 0.48      | 0.25      | 0.24      | 0.34      | 0.22      | 0.46      | 0.45      | 0.33      | 0.26      | 0.28      | 0.35      | 0.49      | 0.40      | 0.32      |
| CE15       | 0.02      | 0.00      | 0.03      | 0.03      | 0.04      | 0.03      | 0.02      | 0.00      | 0.01      | 0.00      | 0.00      | 0.00      | 0.00      | 0.00      | 0.01      | 0.02      |
| GT79       | 0.00      | 0.00      | 0.00      | 0.00      | 0.00      | 0.00      | 0.00      | 0.00      | 0.00      | 0.00      | 0.00      | 0.00      | 0.00      | 0.00      | 0.00      | 0.00      |
| GT10       | 0.01      | 0.01      | 0.03      | 0.00      | 0.00      | 0.01      | 0.04      | 0.00      | 0.00      | 0.00      | 0.00      | 0.00      | 0.00      | 0.00      | 0.01      | 0.00      |
| GH119      | 0.00      | 0.00      | 0.00      | 0.00      | 0.00      | 0.00      | 0.00      | 0.00      | 0.00      | 0.00      | 0.00      | 0.00      | 0.00      | 0.00      | 0.00      | 0.00      |
| GH16       | 0.30      | 0.19      | 0.12      | 0.03      | 0.09      | 0.12      | 0.09      | 0.31      | 0.06      | 0.28      | 0.28      | 0.15      | 0.21      | 0.32      | 0.35      | 0.23      |
| GH43       | 2.58      | 2.07      | 2.20      | 0.91      | 0.98      | 1.12      | 1.48      | 1.81      | 0.85      | 1.96      | 2.86      | 1.02      | 1.69      | 2.28      | 2.53      | 1.92      |
| GH51       | 0.46      | 0.49      | 0.51      | 0.22      | 0.35      | 0.34      | 0.34      | 0.46      | 0.30      | 0.45      | 0.56      | 0.37      | 0.45      | 0.49      | 0.69      | 0.56      |
| GT35       | 0.48      | 0.74      | 1.15      | 0.81      | 0.53      | 1.15      | 0.95      | 0.67      | 1.09      | 0.68      | 0.92      | 0.87      | 0.54      | 0.72      | 0.84      | 0.86      |
| GT25       | 0.00      | 0.00      | 0.00      | 0.00      | 0.00      | 0.00      | 0.00      | 0.02      | 0.00      | 0.00      | 0.00      | 0.00      | 0.00      | 0.00      | 0.00      | 0.00      |
| GT2        | 3.99      | 4.15      | 3.62      | 2.52      | 2.78      | 3.72      | 3.46      | 4.41      | 3.49      | 3.68      | 4.18      | 3.14      | 3.35      | 4.06      | 4.02      | 3.50      |
| GT51       | 0.88      | 0.67      | 0.66      | 0.63      | 0.83      | 0.78      | 0.58      | 0.62      | 0.78      | 0.62      | 0.67      | 0.56      | 0.75      | 0.87      | 0.86      | 0.70      |
| GH107      | 0.00      | 0.00      | 0.00      | 0.00      | 0.00      | 0.00      | 0.00      | 0.00      | 0.00      | 0.00      | 0.00      | 0.00      | 0.00      | 0.00      | 0.00      | 0.00      |
| GH7        | 0.00      | 0.00      | 0.00      | 0.00      | 0.00      | 0.00      | 0.00      | 0.00      | 0.00      | 0.00      | 0.00      | 0.00      | 0.00      | 0.00      | 0.00      | 0.00      |
| GT7        | 0.00      | 0.00      | 0.00      | 0.00      | 0.00      | 0.00      | 0.00      | 0.00      | 0.00      | 0.00      | 0.00      | 0.00      | 0.00      | 0.00      | 0.00      | 0.00      |
| GT36       | 0.00      | 0.00      | 0.00      | 0.00      | 0.00      | 0.00      | 0.00      | 0.00      | 0.00      | 0.00      | 0.00      | 0.00      | 0.00      | 0.00      | 0.00      | 0.00      |
| PL7        | 0.00      | 0.00      | 0.00      | 0.00      | 0.00      | 0.00      | 0.00      | 0.00      | 0.00      | 0.00      | 0.00      | 0.00      | 0.00      | 0.00      | 0.00      | 0.00      |
| GH110      | 0.16      | 0.05      | 0.06      | 0.05      | 0.07      | 0.03      | 0.13      | 0.31      | 0.04      | 0.14      | 0.20      | 0.07      | 0.12      | 0.37      | 0.18      | 0.05      |
| GT21       | 0.00      | 0.00      | 0.00      | 0.00      | 0.00      | 0.00      | 0.00      | 0.00      | 0.00      | 0.00      | 0.00      | 0.00      | 0.00      | 0.00      | 0.00      | 0.00      |
| GH62       | 0.00      | 0.00      | 0.00      | 0.00      | 0.00      | 0.00      | 0.00      | 0.00      | 0.00      | 0.00      | 0.00      | 0.00      | 0.00      | 0.00      | 0.00      | 0.00      |
| GH125      | 0.21      | 0.23      | 0.03      | 0.13      | 0.04      | 0.09      | 0.15      | 0.17      | 0.01      | 0.11      | 0.12      | 0.04      | 0.14      | 0.18      | 0.23      | 0.05      |
| GH117      | 0.11      | 0.11      | 0.03      | 0.04      | 0.04      | 0.03      | 0.09      | 0.12      | 0.01      | 0.09      | 0.12      | 0.04      | 0.09      | 0.07      | 0.06      | 0.07      |
| GH68       | 0.00      | 0.00      | 0.03      | 0.00      | 0.00      | 0.00      | 0.00      | 0.00      | 0.03      | 0.00      | 0.00      | 0.00      | 0.00      | 0.00      | 0.00      | 0.00      |
| GH85       | 0.00      | 0.00      | 0.00      | 0.00      | 0.00      | 0.00      | 0.02      | 0.00      | 0.00      | 0.00      | 0.02      | 0.00      | 0.00      | 0.00      | 0.04      | 0.07      |
| GH92       | 1.76      | 1.41      | 0.78      | 0.45      | 0.92      | 0.40      | 0.82      | 1.94      | 0.14      | 1.58      | 1.45      | 0.72      | 1.34      | 2.12      | 2.24      | 0.63      |
| GH40       | 0.00      | 0.00      | 0.00      | 0.00      | 0.00      | 0.00      | 0.00      | 0.00      | 0.00      | 0.00      | 0.00      | 0.00      | 0.00      | 0.00      | 0.00      | 0.00      |
| GT49       | 0.00      | 0.00      | 0.00      | 0.00      | 0.00      | 0.00      | 0.00      | 0.00      | 0.00      | 0.00      | 0.00      | 0.00      | 0.00      | 0.00      | 0.00      | 0.00      |
| GH112      | 0.07      | 0.15      | 0.39      | 0.15      | 0.06      | 0.19      | 0.26      | 0.10      | 0.28      | 0.11      | 0.20      | 0.11      | 0.07      | 0.12      | 0.23      | 0.25      |
| GT67       | 0.00      | 0.00      | 0.00      | 0.00      | 0.00      | 0.00      | 0.00      | 0.00      | 0.00      | 0.00      | 0.00      | 0.00      | 0.00      | 0.00      | 0.00      | 0.00      |
| CE8        | 0.29      | 0.18      | 0.33      | 0.09      | 0.13      | 0.32      | 0.19      | 0.25      | 0.15      | 0.17      | 0.41      | 0.15      | 0.14      | 0.23      | 0.34      | 0.23      |
| GT86       | 0.00      | 0.00      | 0.00      | 0.00      | 0.00      | 0.00      | 0.00      | 0.00      | 0.00      | 0.00      | 0.00      | 0.00      | 0.00      | 0.00      | 0.00      | 0.00      |
| GH101      | 0.00      | 0.00      | 0.09      | 0.01      | 0.00      | 0.00      | 0.00      | 0.00      | 0.00      | 0.00      | 0.00      | 0.00      | 0.00      | 0.00      | 0.00      | 0.00      |
| GH81       | 0.02      | 0.00      | 0.00      | 0.00      | 0.00      | 0.00      | 0.00      | 0.00      | 0.00      | 0.00      | 0.00      | 0.00      | 0.00      | 0.00      | 0.00      | 0.05      |
| GT93       | 0.00      | 0.00      | 0.00      | 0.00      | 0.00      | 0.00      | 0.00      | 0.00      | 0.00      | 0.00      | 0.00      | 0.00      | 0.00      | 0.00      | 0.00      | 0.00      |
| GT63       | 0.00      | 0.00      | 0.00      | 0.00      | 0.00      | 0.00      | 0.00      | 0.00      | 0.00      | 0.00      | 0.00      | 0.00      | 0.00      | 0.00      | 0.00      | 0.00      |
| CE11       | 0.21      | 0.16      | 0.15      | 0.08      | 0.20      | 0.10      | 0.22      | 0.23      | 0.10      | 0.17      | 0.26      | 0.19      | 0.24      | 0.21      | 0.27      | 0.16      |
| GT19       | 0.21      | 0.08      | 0.18      | 0.04      | 0.17      | 0.06      | 0.09      | 0.15      | 0.02      | 0.17      | 0.13      | 0.15      | 0.17      | 0.16      | 0.14      | 0.11      |
| GT33       | 0.00      | 0.00      | 0.00      | 0.00      | 0.00      | 0.00      | 0.00      | 0.00      | 0.00      | 0.00      | 0.00      | 0.00      | 0.00      | 0.00      | 0.00      | 0.00      |
| GH21       | 0.00      | 0.00      | 0.00      | 0.00      | 0.00      | 0.00      | 0.00      | 0.00      | 0.00      | 0.00      | 0.00      | 0.00      | 0.00      | 0.00      | 0.00      | 0.00      |
| GT68       | 0.00      | 0.00      | 0.00      | 0.00      | 0.00      | 0.00      | 0.00      | 0.00      | 0.00      | 0.00      | 0.00      | 0.00      | 0.00      | 0.00      | 0.00      | 0.00      |
| GH89       | 0.36      | 0.12      | 0.15      | 0.09      | 0.09      | 0.12      | 0.06      | 0.44      | 0.04      | 0.26      | 0.33      | 0.19      | 0.21      | 0.32      | 0.38      | 0.20      |
| GT82       | 0.00      | 0.00      | 0.00      | 0.00      | 0.00      | 0.00      | 0.00      | 0.00      | 0.00      | 0.00      | 0.00      | 0.00      | 0.00      | 0.00      | 0.00      | 0.00      |
| GH30       | 0.36      | 0.33      | 0.27      | 0.09      | 0.26      | 0.06      | 0.15      | 0.35      | 0.08      | 0.33      | 0.20      | 0.17      | 0.17      | 0.21      | 0.35      | 0.09      |
| GH20       | 1.52      | 0.69      | 0.51      | 0.46      | 0.63      | 0.44      | 0.64      | 1.67      | 0.32      | 1.09      | 1.17      | 1.04      | 1.20      | 1.55      | 1.51      | 0.70      |
| GH52       | 0.00      | 0.00      | 0.00      | 0.00      | 0.00      | 0.00      | 0.00      | 0.00      | 0.00      | 0.00      | 0.00      | 0.00      | 0.00      | 0.00      | 0.00      | 0.00      |
| GT84       | 0.00      | 0.00      | 0.00      | 0.00      | 0.00      | 0.00      | 0.06      | 0.00      | 0.00      | 0.00      | 0.02      | 0.02      | 0.00      | 0.00      | 0.00      | 0.00      |
| GT15       | 0.00      | 0.00      | 0.00      | 0.00      | 0.00      | 0.00      | 0.00      | 0.00      | 0.00      | 0.00      | 0.00      | 0.00      | 0.00      | 0.00      | 0.00      | 0.00      |
| GH93       | 0.01      | 0.00      | 0.00      | 0.00      | 0.02      | 0.00      | 0.00      | 0.02      | 0.00      | 0.01      | 0.02      | 0.00      | 0.00      | 0.02      | 0.00      | 0.00      |
| PL16       | 0.00      | 0.00      | 0.00      | 0.00      | 0.00      | 0.00      | 0.00      | 0.00      | 0.01      | 0.00      | 0.00      | 0.00      | 0.00      | 0.00      | 0.00      | 0.00      |
| GH26       | 0.04      | 0.18      | 0.18      | 0.00      | 0.06      | 0.00      | 0.07      | 0.06      | 0.01      | 0.04      | 0.16      | 0.11      | 0.03      | 0.09      | 0.16      | 0.05      |

## Normalized\_abundance\_2

| CAZY_group | CN-AD-119 | CN-AD-120 | CN-AD-121 | CN-AD-122 | CN-AD-123 | CN-AD-124 | CN-AD-125 | CN-AD-126 | CN-AD-127 | CN-AD-128 | CN-AD-129 | CN-AD-130 | CN-AD-131 | CN-AD-132 | CN-AD-133 | CN-AD-134 |
|------------|-----------|-----------|-----------|-----------|-----------|-----------|-----------|-----------|-----------|-----------|-----------|-----------|-----------|-----------|-----------|-----------|
| GT75       | 0.00      | 0.00      | 0.00      | 0.00      | 0.00      | 0.00      | 0.00      | 0.00      | 0.00      | 0.00      | 0.00      | 0.00      | 0.00      | 0.00      | 0.00      | 0.00      |
| GH53       | 0.07      | 0.27      | 0.06      | 0.07      | 0.00      | 0.07      | 0.13      | 0.00      | 0.03      | 0.01      | 0.20      | 0.09      | 0.05      | 0.07      | 0.20      | 0.25      |
| GT88       | 0.00      | 0.00      | 0.00      | 0.00      | 0.00      | 0.00      | 0.00      | 0.00      | 0.00      | 0.00      | 0.00      | 0.00      | 0.00      | 0.00      | 0.00      | 0.00      |
| GT24       | 0.00      | 0.00      | 0.00      | 0.00      | 0.00      | 0.00      | 0.00      | 0.00      | 0.00      | 0.00      | 0.00      | 0.00      | 0.00      | 0.00      | 0.00      | 0.00      |
| GT81       | 0.00      | 0.00      | 0.00      | 0.00      | 0.00      | 0.00      | 0.00      | 0.00      | 0.00      | 0.00      | 0.00      | 0.00      | 0.00      | 0.00      | 0.00      | 0.00      |
| GH4        | 0.02      | 0.05      | 0.24      | 0.24      | 0.24      | 0.29      | 0.02      | 0.10      | 0.21      | 0.03      | 0.07      | 0.06      | 0.19      | 0.04      | 0.03      | 0.09      |
| GT78       | 0.00      | 0.00      | 0.00      | 0.00      | 0.00      | 0.00      | 0.00      | 0.00      | 0.00      | 0.00      | 0.00      | 0.00      | 0.00      | 0.00      | 0.00      | 0.00      |
| GH8        | 0.02      | 0.03      | 0.03      | 0.01      | 0.06      | 0.07      | 0.07      | 0.00      | 0.03      | 0.00      | 0.03      | 0.02      | 0.00      | 0.05      | 0.01      | 0.07      |
| GH70       | 0.00      | 0.00      | 0.09      | 0.00      | 0.00      | 0.00      | 0.00      | 0.00      | 0.18      | 0.00      | 0.00      | 0.00      | 0.00      | 0.00      | 0.00      | 0.02      |
| GH122      | 0.00      | 0.00      | 0.00      | 0.00      | 0.00      | 0.00      | 0.00      | 0.00      | 0.00      | 0.00      | 0.00      | 0.00      | 0.00      | 0.00      | 0.00      | 0.00      |
| GH74       | 0.00      | 0.07      | 0.09      | 0.01      | 0.00      | 0.00      | 0.06      | 0.00      | 0.01      | 0.00      | 0.00      | 0.00      | 0.00      | 0.00      | 0.04      | 0.02      |
| GT41       | 0.00      | 0.00      | 0.00      | 0.00      | 0.02      | 0.00      | 0.00      | 0.00      | 0.00      | 0.00      | 0.02      | 0.00      | 0.00      | 0.02      | 0.01      | 0.00      |
| PL1        | 0.61      | 0.23      | 0.27      | 0.15      | 0.15      | 0.25      | 0.19      | 0.35      | 0.10      | 0.24      | 0.35      | 0.20      | 0.26      | 0.26      | 0.54      | 0.25      |
| GH15       | 0.02      | 0.07      | 0.03      | 0.01      | 0.00      | 0.04      | 0.06      | 0.02      | 0.00      | 0.01      | 0.07      | 0.02      | 0.03      | 0.05      | 0.04      | 0.02      |
| GH32       | 0.45      | 0.36      | 0.87      | 0.44      | 0.20      | 0.37      | 0.24      | 0.37      | 0.55      | 0.34      | 0.48      | 0.45      | 0.30      | 0.44      | 0.37      | 0.47      |
| GH44       | 0.00      | 0.00      | 0.00      | 0.00      | 0.00      | 0.00      | 0.00      | 0.00      | 0.00      | 0.00      | 0.00      | 0.00      | 0.00      | 0.00      | 0.01      | 0.00      |
| GT6        | 0.00      | 0.00      | 0.00      | 0.00      | 0.00      | 0.01      | 0.04      | 0.00      | 0.00      | 0.00      | 0.00      | 0.00      | 0.00      | 0.00      | 0.00      | 0.00      |
| GH13       | 1.95      | 2.73      | 3.47      | 2.86      | 1.62      | 3.70      | 2.73      | 1.89      | 3.74      | 2.14      | 2.60      | 2.43      | 2.29      | 1.99      | 2.75      | 3.05      |
| GT80       | 0.00      | 0.00      | 0.00      | 0.00      | 0.02      | 0.03      | 0.00      | 0.02      | 0.00      | 0.00      | 0.00      | 0.02      | 0.00      | 0.00      | 0.00      | 0.02      |
| GH71       | 0.00      | 0.00      | 0.00      | 0.00      | 0.00      | 0.00      | 0.00      | 0.00      | 0.00      | 0.00      | 0.00      | 0.00      | 0.00      | 0.00      | 0.00      | 0.00      |
| GH63       | 0.14      | 0.15      | 0.09      | 0.01      | 0.09      | 0.04      | 0.22      | 0.08      | 0.06      | 0.03      | 0.08      | 0.04      | 0.14      | 0.05      | 0.14      | 0.07      |
| PL21       | 0.09      | 0.10      | 0.00      | 0.00      | 0.00      | 0.00      | 0.04      | 0.04      | 0.00      | 0.10      | 0.08      | 0.00      | 0.03      | 0.05      | 0.03      | 0.00      |
| GH65       | 0.26      | 0.18      | 0.00      | 0.12      | 0.09      | 0.12      | 0.07      | 0.08      | 0.07      | 0.10      | 0.05      | 0.09      | 0.09      | 0.09      | 0.20      | 0.11      |
| CE4        | 0.46      | 0.66      | 0.63      | 0.48      | 0.31      | 0.56      | 0.52      | 0.37      | 0.69      | 0.38      | 0.53      | 0.37      | 0.44      | 0.28      | 0.64      | 0.47      |
| CE14       | 0.00      | 0.01      | 0.00      | 0.00      | 0.02      | 0.01      | 0.00      | 0.02      | 0.00      | 0.00      | 0.03      | 0.00      | 0.02      | 0.02      | 0.00      | 0.00      |
| GH115      | 0.38      | 0.30      | 0.12      | 0.05      | 0.18      | 0.21      | 0.07      | 0.44      | 0.10      | 0.21      | 0.25      | 0.17      | 0.12      | 0.16      | 0.28      | 0.25      |
| GH104      | 0.00      | 0.00      | 0.00      | 0.00      | 0.06      | 0.01      | 0.00      | 0.00      | 0.00      | 0.00      | 0.00      | 0.00      | 0.00      | 0.00      | 0.00      | 0.00      |
| GH111      | 0.00      | 0.00      | 0.00      | 0.00      | 0.00      | 0.00      | 0.00      | 0.00      | 0.00      | 0.00      | 0.00      | 0.00      | 0.00      | 0.00      | 0.00      | 0.00      |
| GH95       | 0.73      | 0.51      | 0.48      | 0.16      | 0.31      | 0.31      | 0.30      | 0.85      | 0.21      | 0.62      | 0.77      | 0.39      | 0.56      | 0.60      | 0.85      | 0.36      |
| GT70       | 0.00      | 0.00      | 0.00      | 0.00      | 0.00      | 0.00      | 0.00      | 0.00      | 0.00      | 0.00      | 0.00      | 0.00      | 0.00      | 0.00      | 0.00      | 0.00      |
| CE10       | 0.24      | 0.11      | 0.12      | 0.09      | 0.18      | 0.15      | 0.06      | 0.15      | 0.06      | 0.16      | 0.20      | 0.07      | 0.12      | 0.26      | 0.20      | 0.07      |
| GH10       | 0.09      | 0.11      | 0.12      | 0.08      | 0.06      | 0.04      | 0.02      | 0.04      | 0.06      | 0.06      | 0.13      | 0.04      | 0.03      | 0.05      | 0.16      | 0.14      |
| GH130      | 0.48      | 0.33      | 0.15      | 0.16      | 0.17      | 0.16      | 0.19      | 0.38      | 0.13      | 0.28      | 0.43      | 0.28      | 0.21      | 0.25      | 0.54      | 0.20      |
| PL20       | 0.00      | 0.00      | 0.00      | 0.00      | 0.00      | 0.00      | 0.00      | 0.00      | 0.00      | 0.00      | 0.00      | 0.00      | 0.00      | 0.00      | 0.00      | 0.00      |
| GH69       | 0.00      | 0.00      | 0.00      | 0.00      | 0.00      | 0.00      | 0.00      | 0.00      | 0.00      | 0.00      | 0.00      | 0.00      | 0.00      | 0.00      | 0.00      | 0.00      |
| PL2        | 0.00      | 0.00      | 0.00      | 0.00      | 0.00      | 0.00      | 0.00      | 0.00      | 0.00      | 0.00      | 0.00      | 0.00      | 0.00      | 0.00      | 0.00      | 0.00      |
| GH49       | 0.00      | 0.00      | 0.00      | 0.00      | 0.00      | 0.00      | 0.00      | 0.00      | 0.00      | 0.00      | 0.00      | 0.00      | 0.00      | 0.00      | 0.00      | 0.00      |
| GH25       | 0.24      | 0.38      | 0.48      | 0.30      | 0.17      | 0.35      | 0.26      | 0.23      | 0.44      | 0.23      | 0.44      | 0.35      | 0.24      | 0.28      | 0.37      | 0.59      |
| GH59       | 0.01      | 0.04      | 0.03      | 0.00      | 0.02      | 0.00      | 0.06      | 0.02      | 0.00      | 0.03      | 0.00      | 0.00      | 0.00      | 0.00      | 0.04      | 0.00      |
| GH35       | 0.55      | 0.27      | 0.24      | 0.13      | 0.35      | 0.13      | 0.15      | 0.67      | 0.06      | 0.57      | 0.31      | 0.39      | 0.35      | 0.64      | 0.50      | 0.27      |
| GT39       | 0.00      | 0.00      | 0.00      | 0.00      | 0.00      | 0.00      | 0.00      | 0.00      | 0.00      | 0.00      | 0.00      | 0.00      | 0.00      | 0.00      | 0.01      | 0.00      |
| GT57       | 0.00      | 0.00      | 0.00      | 0.00      | 0.00      | 0.00      | 0.00      | 0.00      | 0.00      | 0.00      | 0.00      | 0.00      | 0.00      | 0.00      | 0.00      | 0.00      |
| GH129      | 0.00      | 0.00      | 0.03      | 0.00      | 0.00      | 0.03      | 0.00      | 0.00      | 0.06      | 0.00      | 0.00      | 0.00      | 0.00      | 0.00      | 0.00      | 0.00      |
| GT22       | 0.00      | 0.00      | 0.00      | 0.00      | 0.00      | 0.00      | 0.00      | 0.00      | 0.00      | 0.00      | 0.00      | 0.00      | 0.00      | 0.00      | 0.00      | 0.00      |
| PL12       | 0.31      | 0.15      | 0.00      | 0.05      | 0.07      | 0.03      | 0.04      | 0.17      | 0.00      | 0.21      | 0.13      | 0.00      | 0.12      | 0.12      | 0.16      | 0.00      |
| PL18       | 0.00      | 0.00      | 0.00      | 0.00      | 0.00      | 0.00      | 0.00      | 0.00      | 0.00      | 0.00      | 0.00      | 0.00      | 0.00      | 0.00      | 0.00      | 0.00      |
| GT92       | 0.00      | 0.00      | 0.00      | 0.00      | 0.00      | 0.00      | 0.00      | 0.00      | 0.00      | 0.00      | 0.00      | 0.00      | 0.00      | 0.00      | 0.00      | 0.00      |
| GT44       | 0.00      | 0.00      | 0.00      | 0.00      | 0.00      | 0.00      | 0.00      | 0.00      | 0.00      | 0.00      | 0.00      | 0.00      | 0.00      | 0.00      | 0.00      | 0.00      |
| GT29       | 0.00      | 0.00      | 0.00      | 0.00      | 0.00      | 0.00      | 0.00      | 0.00      | 0.00      | 0.00      | 0.00      | 0.00      | 0.00      | 0.00      | 0.00      | 0.00      |
| GT13       | 0.00      | 0.00      | 0.00      | 0.00      | 0.00      | 0.00      | 0.00      | 0.00      | 0.00      | 0.00      | 0.00      | 0.00      | 0.00      | 0.00      | 0.00      | 0.00      |

Normalized\_abundance\_2

| CAZY_group | CN-AD-119 | CN-AD-120 | CN-AD-121 | CN-AD-122 | CN-AD-123 | CN-AD-124 | CN-AD-125 | CN-AD-126 | CN-AD-127 | CN-AD-128 | CN-AD-129 | CN-AD-130 | CN-AD-131 | CN-AD-132 | CN-AD-133 | CN-AD-134 |
|------------|-----------|-----------|-----------|-----------|-----------|-----------|-----------|-----------|-----------|-----------|-----------|-----------|-----------|-----------|-----------|-----------|
| GT52       | 0.00      | 0.00      | 0.00      | 0.00      | 0.00      | 0.00      | 0.00      | 0.00      | 0.00      | 0.00      | 0.00      | 0.00      | 0.00      | 0.00      | 0.00      | 0.00      |
| GT64       | 0.00      | 0.00      | 0.00      | 0.00      | 0.00      | 0.00      | 0.00      | 0.00      | 0.00      | 0.00      | 0.00      | 0.00      | 0.00      | 0.00      | 0.00      | 0.00      |
| GT85       | 0.00      | 0.00      | 0.00      | 0.00      | 0.00      | 0.00      | 0.00      | 0.00      | 0.00      | 0.00      | 0.00      | 0.00      | 0.00      | 0.00      | 0.00      | 0.00      |
| GT16       | 0.00      | 0.00      | 0.00      | 0.00      | 0.00      | 0.00      | 0.00      | 0.00      | 0.00      | 0.00      | 0.00      | 0.00      | 0.00      | 0.00      | 0.00      | 0.00      |
| GH56       | 0.00      | 0.00      | 0.00      | 0.00      | 0.00      | 0.00      | 0.00      | 0.00      | 0.00      | 0.00      | 0.00      | 0.00      | 0.00      | 0.00      | 0.00      | 0.00      |
| GT60       | 0.00      | 0.00      | 0.00      | 0.00      | 0.00      | 0.00      | 0.00      | 0.00      | 0.00      | 0.00      | 0.00      | 0.00      | 0.00      | 0.00      | 0.00      | 0.00      |
| GH41       | 0.00      | 0.00      | 0.00      | 0.00      | 0.00      | 0.00      | 0.00      | 0.00      | 0.00      | 0.00      | 0.00      | 0.00      | 0.00      | 0.00      | 0.00      | 0.00      |
| CE7        | 0.16      | 0.11      | 0.12      | 0.07      | 0.06      | 0.07      | 0.09      | 0.12      | 0.03      | 0.13      | 0.15      | 0.04      | 0.12      | 0.07      | 0.16      | 0.09      |
| GH39       | 0.00      | 0.03      | 0.03      | 0.05      | 0.06      | 0.04      | 0.09      | 0.00      | 0.02      | 0.01      | 0.10      | 0.02      | 0.00      | 0.00      | 0.06      | 0.11      |
| GT30       | 0.31      | 0.18      | 0.21      | 0.13      | 0.18      | 0.19      | 0.11      | 0.33      | 0.07      | 0.20      | 0.31      | 0.19      | 0.23      | 0.35      | 0.30      | 0.11      |
| PL15       | 0.26      | 0.05      | 0.00      | 0.04      | 0.06      | 0.06      | 0.02      | 0.15      | 0.00      | 0.24      | 0.07      | 0.00      | 0.05      | 0.12      | 0.14      | 0.14      |
| GH102      | 0.01      | 0.01      | 0.03      | 0.03      | 0.02      | 0.09      | 0.00      | 0.00      | 0.01      | 0.00      | 0.02      | 0.00      | 0.02      | 0.02      | 0.00      | 0.02      |

Normalized\_abundance\_2

| CAZY_group | CN-AD-135 | CN-AD-136 | CN-AD-137 | CN-AD-138 | CN-AD-139 | CN-AD-140 | CN-AD-141 | CN-AD-142 | CN-AD-143 | CN-AD-144 | IN-CH-17 | IN-CH-18 | IN-CH-19 | IN-CH-20 | IN-IN-2 | VE-AD-1 |
|------------|-----------|-----------|-----------|-----------|-----------|-----------|-----------|-----------|-----------|-----------|----------|----------|----------|----------|---------|---------|
| GH29       | 0.42      | 0.54      | 0.48      | 0.80      | 0.58      | 0.45      | 0.44      | 0.23      | 0.68      | 0.53      | 0.58     | 0.49     | 0.54     | 0.67     | 0.54    | 1.04    |
| PL4        | 0.00      | 0.00      | 0.00      | 0.00      | 0.00      | 0.02      | 0.00      | 0.00      | 0.01      | 0.00      | 0.00     | 0.00     | 0.00     | 0.00     | 0.00    | 0.00    |
| GH23       | 0.89      | 1.14      | 0.99      | 0.76      | 0.83      | 1.04      | 0.96      | 1.01      | 0.95      | 0.92      | 0.58     | 0.57     | 0.61     | 0.89     | 0.68    | 2.08    |
| CE6        | 0.04      | 0.03      | 0.02      | 0.02      | 0.04      | 0.04      | 0.07      | 0.02      | 0.05      | 0.05      | 0.19     | 0.33     | 0.31     | 0.24     | 0.10    | 0.31    |
| GH72       | 0.06      | 0.08      | 0.05      | 0.06      | 0.10      | 0.02      | 0.09      | 0.02      | 0.05      | 0.11      | 0.10     | 0.13     | 0.14     | 0.10     | 0.10    | 0.73    |
| GH114      | 0.00      | 0.00      | 0.00      | 0.00      | 0.00      | 0.00      | 0.00      | 0.00      | 0.00      | 0.00      | 0.00     | 0.00     | 0.00     | 0.00     | 0.00    | 0.00    |
| GH78       | 0.47      | 0.55      | 0.66      | 0.78      | 0.87      | 0.74      | 0.25      | 0.25      | 1.18      | 1.03      | 0.13     | 0.20     | 0.14     | 0.22     | 0.50    | 0.10    |
| PL19       | 0.00      | 0.00      | 0.00      | 0.00      | 0.00      | 0.00      | 0.00      | 0.00      | 0.00      | 0.00      | 0.00     | 0.00     | 0.00     | 0.00     | 0.00    | 0.00    |
| GT27       | 0.00      | 0.00      | 0.00      | 0.00      | 0.00      | 0.00      | 0.00      | 0.00      | 0.00      | 0.00      | 0.00     | 0.00     | 0.00     | 0.00     | 0.00    | 0.10    |
| GH5        | 0.33      | 0.28      | 0.23      | 0.19      | 0.19      | 0.32      | 0.22      | 0.18      | 0.08      | 0.29      | 0.26     | 0.84     | 0.68     | 0.75     | 0.41    | 0.73    |
| GT40       | 0.00      | 0.00      | 0.00      | 0.00      | 0.00      | 0.00      | 0.00      | 0.00      | 0.00      | 0.00      | 0.00     | 0.00     | 0.00     | 0.00     | 0.00    | 0.00    |
| CE13       | 0.00      | 0.02      | 0.00      | 0.00      | 0.00      | 0.00      | 0.00      | 0.00      | 0.00      | 0.00      | 0.00     | 0.00     | 0.00     | 0.00     | 0.00    | 0.00    |
| GT37       | 0.00      | 0.00      | 0.00      | 0.00      | 0.00      | 0.00      | 0.00      | 0.00      | 0.00      | 0.00      | 0.00     | 0.00     | 0.00     | 0.00     | 0.00    | 0.00    |
| GH33       | 0.14      | 0.25      | 0.25      | 0.31      | 0.23      | 0.20      | 0.15      | 0.05      | 0.15      | 0.21      | 0.00     | 0.02     | 0.02     | 0.02     | 0.15    | 0.10    |
| GT65       | 0.00      | 0.00      | 0.00      | 0.00      | 0.00      | 0.00      | 0.00      | 0.00      | 0.00      | 0.00      | 0.00     | 0.00     | 0.00     | 0.00     | 0.00    | 0.00    |
| GH86       | 0.00      | 0.00      | 0.00      | 0.00      | 0.00      | 0.00      | 0.00      | 0.00      | 0.00      | 0.00      | 0.00     | 0.00     | 0.00     | 0.00     | 0.00    | 0.00    |
| GH123      | 0.04      | 0.06      | 0.12      | 0.06      | 0.19      | 0.11      | 0.01      | 0.02      | 0.10      | 0.15      | 0.03     | 0.07     | 0.09     | 0.10     | 0.06    | 0.21    |
| GH96       | 0.00      | 0.00      | 0.00      | 0.00      | 0.00      | 0.00      | 0.00      | 0.00      | 0.00      | 0.00      | 0.00     | 0.00     | 0.00     | 0.00     | 0.00    | 0.00    |
| GH14       | 0.00      | 0.00      | 0.00      | 0.00      | 0.00      | 0.00      | 0.00      | 0.00      | 0.00      | 0.00      | 0.00     | 0.00     | 0.00     | 0.00     | 0.00    | 0.00    |
| CE3        | 0.00      | 0.00      | 0.00      | 0.00      | 0.00      | 0.00      | 0.00      | 0.00      | 0.00      | 0.00      | 0.00     | 0.00     | 0.00     | 0.00     | 0.00    | 0.00    |
| PL10       | 0.10      | 0.05      | 0.07      | 0.10      | 0.10      | 0.05      | 0.19      | 0.00      | 0.15      | 0.06      | 0.16     | 0.18     | 0.22     | 0.24     | 0.23    | 0.10    |
| GT48       | 0.00      | 0.00      | 0.00      | 0.00      | 0.00      | 0.00      | 0.00      | 0.00      | 0.00      | 0.00      | 0.00     | 0.00     | 0.00     | 0.00     | 0.00    | 0.00    |
| PL6        | 0.00      | 0.00      | 0.00      | 0.00      | 0.00      | 0.00      | 0.00      | 0.00      | 0.00      | 0.00      | 0.00     | 0.00     | 0.00     | 0.00     | 0.00    | 0.00    |
| GT83       | 0.05      | 0.03      | 0.15      | 0.08      | 0.14      | 0.13      | 0.04      | 0.11      | 0.08      | 0.08      | 0.06     | 0.13     | 0.13     | 0.26     | 0.06    | 0.10    |
| GH126      | 0.00      | 0.00      | 0.00      | 0.00      | 0.00      | 0.00      | 0.00      | 0.00      | 0.00      | 0.00      | 0.00     | 0.00     | 0.00     | 0.00     | 0.00    | 0.00    |
| GH9        | 0.15      | 0.35      | 0.12      | 0.19      | 0.17      | 0.27      | 0.01      | 0.02      | 0.07      | 0.16      | 0.03     | 0.02     | 0.05     | 0.08     | 0.17    | 0.00    |
| GH75       | 0.00      | 0.00      | 0.00      | 0.00      | 0.00      | 0.00      | 0.00      | 0.00      | 0.00      | 0.00      | 0.00     | 0.00     | 0.00     | 0.00     | 0.00    | 0.00    |
| GT71       | 0.00      | 0.00      | 0.00      | 0.00      | 0.00      | 0.00      | 0.00      | 0.00      | 0.00      | 0.00      | 0.00     | 0.00     | 0.00     | 0.00     | 0.00    | 0.00    |
| GH46       | 0.00      | 0.00      | 0.00      | 0.00      | 0.00      | 0.00      | 0.00      | 0.00      | 0.00      | 0.00      | 0.00     | 0.00     | 0.00     | 0.00     | 0.00    | 0.00    |
| GT61       | 0.00      | 0.00      | 0.00      | 0.00      | 0.00      | 0.00      | 0.00      | 0.00      | 0.00      | 0.00      | 0.00     | 0.00     | 0.00     | 0.00     | 0.00    | 0.00    |
| GT3        | 0.05      | 0.09      | 0.12      | 0.15      | 0.02      | 0.04      | 0.04      | 0.00      | 0.08      | 0.06      | 0.16     | 0.20     | 0.25     | 0.22     | 0.12    | 0.10    |
| PL3        | 0.00      | 0.00      | 0.00      | 0.00      | 0.00      | 0.00      | 0.00      | 0.00      | 0.00      | 0.00      | 0.00     | 0.00     | 0.00     | 0.00     | 0.00    | 0.00    |
| GH108      | 0.01      | 0.02      | 0.03      | 0.04      | 0.04      | 0.09      | 0.01      | 0.02      | 0.05      | 0.05      | 0.03     | 0.00     | 0.02     | 0.00     | 0.00    | 0.00    |
| GT56       | 0.00      | 0.00      | 0.05      | 0.00      | 0.00      | 0.02      | 0.01      | 0.00      | 0.01      | 0.02      | 0.00     | 0.02     | 0.00     | 0.00     | 0.00    | 0.21    |
| PL11       | 0.11      | 0.03      | 0.07      | 0.10      | 0.10      | 0.05      | 0.06      | 0.09      | 0.20      | 0.08      | 0.00     | 0.09     | 0.02     | 0.10     | 0.02    | 0.00    |
| GH45       | 0.00      | 0.00      | 0.00      | 0.00      | 0.00      | 0.00      | 0.00      | 0.00      | 0.00      | 0.00      | 0.00     | 0.00     | 0.00     | 0.00     | 0.00    | 0.00    |
| GT34       | 0.00      | 0.00      | 0.00      | 0.00      | 0.00      | 0.00      | 0.00      | 0.00      | 0.00      | 0.00      | 0.00     | 0.00     | 0.00     | 0.00     | 0.00    | 0.00    |
| PL14       | 0.00      | 0.00      | 0.00      | 0.00      | 0.00      | 0.00      | 0.00      | 0.00      | 0.00      | 0.00      | 0.00     | 0.00     | 0.00     | 0.00     | 0.00    | 0.00    |
| GH19       | 0.04      | 0.02      | 0.02      | 0.00      | 0.02      | 0.00      | 0.09      | 0.00      | 0.01      | 0.00      | 0.00     | 0.04     | 0.02     | 0.02     | 0.00    | 0.10    |
| GH118      | 0.00      | 0.00      | 0.00      | 0.00      | 0.00      | 0.00      | 0.00      | 0.00      | 0.00      | 0.00      | 0.00     | 0.00     | 0.00     | 0.00     | 0.00    | 0.00    |
| GH82       | 0.00      | 0.00      | 0.00      | 0.00      | 0.00      | 0.00      | 0.00      | 0.00      | 0.00      | 0.00      | 0.00     | 0.00     | 0.00     | 0.00     | 0.00    | 0.00    |
| GH76       | 0.14      | 0.06      | 0.15      | 0.13      | 0.12      | 0.20      | 0.00      | 0.00      | 0.41      | 0.34      | 0.00     | 0.02     | 0.00     | 0.02     | 0.02    | 0.00    |
| GT4        | 1.60      | 1.49      | 1.50      | 1.91      | 1.71      | 1.55      | 1.54      | 0.89      | 1.81      | 1.76      | 1.09     | 1.64     | 1.58     | 1.63     | 1.26    | 2.91    |
| GT87       | 0.00      | 0.02      | 0.00      | 0.00      | 0.00      | 0.00      | 0.00      | 0.00      | 0.00      | 0.00      | 0.00     | 0.00     | 0.00     | 0.00     | 0.00    | 0.10    |
| GH24       | 0.13      | 0.24      | 0.30      | 0.13      | 0.16      | 0.22      | 0.12      | 0.25      | 0.18      | 0.26      | 0.35     | 0.42     | 0.38     | 0.57     | 0.35    | 0.10    |
| GH90       | 0.00      | 0.00      | 0.02      | 0.00      | 0.00      | 0.00      | 0.00      | 0.00      | 0.00      | 0.00      | 0.00     | 0.00     | 0.00     | 0.00     | 0.00    | 0.00    |
| GH57       | 0.06      | 0.13      | 0.03      | 0.15      | 0.08      | 0.07      | 0.07      | 0.02      | 0.05      | 0.11      | 0.29     | 0.09     | 0.23     | 0.35     | 0.08    | 0.21    |
| GH36       | 0.66      | 0.47      | 0.41      | 0.46      | 0.50      | 0.54      | 0.73      | 0.50      | 0.79      | 0.76      | 0.71     | 0.88     | 0.86     | 1.04     | 0.91    | 1.35    |
| GT46       | 0.00      | 0.00      | 0.00      | 0.00      | 0.00      | 0.00      | 0.00      | 0.00      | 0.00      | 0.00      | 0.00     | 0.00     | 0.00     | 0.00     | 0.00    | 0.00    |
| GH66       | 0.01      | 0.02      | 0.03      | 0.00      | 0.02      | 0.05      | 0.04      | 0.05      | 0.04      | 0.06      | 0.06     | 0.09     | 0.09     | 0.10     | 0.04    | 0.31    |

Normalized\_abundance\_2

| CAZY_group | CN-AD-135 | CN-AD-136 | CN-AD-137 | CN-AD-138 | CN-AD-139 | CN-AD-140 | CN-AD-141 | CN-AD-142 | CN-AD-143 | CN-AD-144 | IN-CH-17 | IN-CH-18 | IN-CH-19 | IN-CH-20 | IN-IN-2 | VE-AD-1 |
|------------|-----------|-----------|-----------|-----------|-----------|-----------|-----------|-----------|-----------|-----------|----------|----------|----------|----------|---------|---------|
| GH48       | 0.00      | 0.00      | 0.00      | 0.00      | 0.00      | 0.00      | 0.00      | 0.00      | 0.00      | 0.00      | 0.00     | 0.00     | 0.00     | 0.00     | 0.00    | 0.00    |
| GT53       | 0.00      | 0.00      | 0.00      | 0.00      | 0.00      | 0.00      | 0.00      | 0.00      | 0.00      | 0.00      | 0.00     | 0.00     | 0.00     | 0.00     | 0.00    | 0.00    |
| GH60       | 0.00      | 0.00      | 0.00      | 0.00      | 0.00      | 0.00      | 0.00      | 0.00      | 0.00      | 0.00      | 0.00     | 0.00     | 0.00     | 0.00     | 0.00    | 0.00    |
| GT31       | 0.00      | 0.00      | 0.02      | 0.00      | 0.00      | 0.00      | 0.00      | 0.00      | 0.00      | 0.02      | 0.00     | 0.02     | 0.00     | 0.00     | 0.00    | 0.00    |
| GH105      | 0.51      | 0.32      | 0.41      | 0.50      | 0.60      | 0.29      | 0.39      | 0.21      | 0.61      | 0.52      | 0.13     | 0.24     | 0.18     | 0.31     | 0.15    | 0.62    |
| GT23       | 0.01      | 0.00      | 0.00      | 0.00      | 0.00      | 0.00      | 0.00      | 0.02      | 0.00      | 0.00      | 0.00     | 0.00     | 0.00     | 0.00     | 0.00    | 0.00    |
| GH11       | 0.00      | 0.00      | 0.00      | 0.00      | 0.00      | 0.00      | 0.00      | 0.00      | 0.00      | 0.00      | 0.00     | 0.00     | 0.00     | 0.00     | 0.00    | 0.00    |
| GT38       | 0.00      | 0.00      | 0.00      | 0.00      | 0.00      | 0.00      | 0.00      | 0.00      | 0.00      | 0.00      | 0.00     | 0.00     | 0.00     | 0.00     | 0.00    | 0.00    |
| GT43       | 0.00      | 0.00      | 0.00      | 0.00      | 0.00      | 0.00      | 0.00      | 0.00      | 0.00      | 0.00      | 0.00     | 0.00     | 0.00     | 0.00     | 0.00    | 0.00    |
| GH99       | 0.00      | 0.00      | 0.00      | 0.00      | 0.00      | 0.04      | 0.00      | 0.00      | 0.03      | 0.00      | 0.00     | 0.00     | 0.00     | 0.00     | 0.00    | 0.00    |
| GH38       | 0.24      | 0.19      | 0.13      | 0.19      | 0.10      | 0.20      | 0.09      | 0.21      | 0.24      | 0.29      | 0.00     | 0.04     | 0.02     | 0.02     | 0.04    | 0.73    |
| GH109      | 0.19      | 0.25      | 0.25      | 0.32      | 0.19      | 0.20      | 0.16      | 0.09      | 0.23      | 0.18      | 0.29     | 0.20     | 0.22     | 0.26     | 0.21    | 0.31    |
| GH2        | 3.08      | 3.35      | 3.35      | 3.46      | 3.39      | 3.51      | 2.24      | 2.01      | 3.37      | 3.64      | 2.41     | 3.25     | 3.10     | 2.93     | 2.99    | 8.21    |
| GT28       | 0.46      | 0.33      | 0.28      | 0.32      | 0.33      | 0.20      | 0.51      | 0.50      | 0.39      | 0.27      | 0.19     | 0.27     | 0.38     | 0.45     | 0.35    | 0.94    |
| GH42       | 0.18      | 0.09      | 0.07      | 0.17      | 0.16      | 0.11      | 0.26      | 0.23      | 0.23      | 0.23      | 0.00     | 0.00     | 0.00     | 0.04     | 0.06    | 0.94    |
| GT58       | 0.00      | 0.00      | 0.00      | 0.00      | 0.00      | 0.00      | 0.00      | 0.00      | 0.00      | 0.00      | 0.00     | 0.00     | 0.00     | 0.00     | 0.00    | 0.00    |
| GH61       | 0.00      | 0.00      | 0.00      | 0.00      | 0.00      | 0.00      | 0.00      | 0.00      | 0.00      | 0.00      | 0.00     | 0.00     | 0.00     | 0.00     | 0.00    | 0.00    |
| GH80       | 0.00      | 0.00      | 0.00      | 0.00      | 0.00      | 0.00      | 0.00      | 0.00      | 0.00      | 0.00      | 0.00     | 0.00     | 0.00     | 0.00     | 0.00    | 0.00    |
| GH98       | 0.00      | 0.00      | 0.03      | 0.00      | 0.00      | 0.00      | 0.00      | 0.00      | 0.00      | 0.00      | 0.00     | 0.00     | 0.00     | 0.00     | 0.00    | 0.00    |
| GH6        | 0.00      | 0.00      | 0.00      | 0.00      | 0.00      | 0.00      | 0.00      | 0.00      | 0.00      | 0.00      | 0.00     | 0.00     | 0.00     | 0.00     | 0.00    | 0.00    |
| GT1        | 0.04      | 0.05      | 0.00      | 0.04      | 0.06      | 0.00      | 0.06      | 0.05      | 0.03      | 0.05      | 0.00     | 0.02     | 0.04     | 0.00     | 0.04    | 0.00    |
| GH28       | 0.57      | 0.40      | 0.66      | 0.63      | 0.58      | 0.50      | 0.52      | 0.48      | 0.97      | 0.66      | 0.64     | 0.88     | 1.04     | 0.77     | 0.85    | 1.66    |
| GT42       | 0.00      | 0.00      | 0.00      | 0.00      | 0.00      | 0.00      | 0.00      | 0.00      | 0.00      | 0.00      | 0.00     | 0.00     | 0.00     | 0.00     | 0.00    | 0.00    |
| GH128      | 0.00      | 0.00      | 0.00      | 0.00      | 0.00      | 0.00      | 0.00      | 0.00      | 0.00      | 0.00      | 0.00     | 0.02     | 0.02     | 0.00     | 0.00    | 0.00    |
| CE12       | 0.13      | 0.02      | 0.15      | 0.02      | 0.08      | 0.09      | 0.15      | 0.05      | 0.05      | 0.06      | 0.10     | 0.35     | 0.32     | 0.22     | 0.15    | 0.83    |
| CE16       | 0.00      | 0.00      | 0.00      | 0.00      | 0.00      | 0.00      | 0.00      | 0.00      | 0.00      | 0.00      | 0.00     | 0.00     | 0.00     | 0.00     | 0.00    | 0.00    |
| GT89       | 0.00      | 0.00      | 0.00      | 0.00      | 0.00      | 0.00      | 0.00      | 0.00      | 0.00      | 0.00      | 0.00     | 0.00     | 0.00     | 0.00     | 0.00    | 0.00    |
| GT11       | 0.08      | 0.05      | 0.05      | 0.11      | 0.04      | 0.02      | 0.04      | 0.11      | 0.04      | 0.03      | 0.00     | 0.00     | 0.02     | 0.02     | 0.02    | 0.00    |
| GT77       | 0.01      | 0.02      | 0.02      | 0.02      | 0.00      | 0.02      | 0.01      | 0.02      | 0.01      | 0.00      | 0.03     | 0.11     | 0.13     | 0.02     | 0.04    | 0.83    |
| GT55       | 0.00      | 0.00      | 0.00      | 0.00      | 0.00      | 0.00      | 0.00      | 0.00      | 0.00      | 0.00      | 0.00     | 0.00     | 0.00     | 0.00     | 0.00    | 0.00    |
| GT18       | 0.00      | 0.00      | 0.00      | 0.00      | 0.00      | 0.00      | 0.00      | 0.00      | 0.00      | 0.00      | 0.00     | 0.00     | 0.00     | 0.00     | 0.00    | 0.00    |
| GH87       | 0.00      | 0.00      | 0.00      | 0.00      | 0.02      | 0.00      | 0.06      | 0.05      | 0.00      | 0.02      | 0.00     | 0.00     | 0.02     | 0.00     | 0.00    | 0.00    |
| PL5        | 0.00      | 0.00      | 0.00      | 0.00      | 0.00      | 0.00      | 0.00      | 0.00      | 0.00      | 0.00      | 0.00     | 0.00     | 0.00     | 0.00     | 0.00    | 0.00    |
| GH22       | 0.00      | 0.00      | 0.00      | 0.00      | 0.00      | 0.00      | 0.00      | 0.00      | 0.00      | 0.00      | 0.00     | 0.00     | 0.00     | 0.00     | 0.00    | 0.00    |
| CE2        | 0.04      | 0.06      | 0.00      | 0.02      | 0.02      | 0.04      | 0.07      | 0.00      | 0.03      | 0.00      | 0.03     | 0.04     | 0.02     | 0.04     | 0.04    | 0.00    |
| GH120      | 0.01      | 0.00      | 0.00      | 0.02      | 0.00      | 0.02      | 0.10      | 0.18      | 0.04      | 0.05      | 0.00     | 0.00     | 0.00     | 0.00     | 0.00    | 0.21    |
| GH73       | 0.32      | 0.35      | 0.30      | 0.38      | 0.37      | 0.27      | 0.51      | 0.60      | 0.49      | 0.44      | 0.29     | 0.71     | 0.59     | 0.71     | 0.44    | 1.35    |
| GT17       | 0.00      | 0.00      | 0.00      | 0.00      | 0.00      | 0.00      | 0.00      | 0.00      | 0.00      | 0.00      | 0.00     | 0.00     | 0.00     | 0.00     | 0.00    | 0.00    |
| GH124      | 0.00      | 0.00      | 0.00      | 0.00      | 0.00      | 0.00      | 0.00      | 0.00      | 0.00      | 0.00      | 0.00     | 0.00     | 0.00     | 0.00     | 0.00    | 0.00    |
| GH54       | 0.00      | 0.00      | 0.00      | 0.00      | 0.00      | 0.00      | 0.00      | 0.00      | 0.00      | 0.00      | 0.00     | 0.00     | 0.00     | 0.00     | 0.00    | 0.00    |
| GH100      | 0.00      | 0.00      | 0.00      | 0.00      | 0.00      | 0.00      | 0.00      | 0.00      | 0.00      | 0.00      | 0.00     | 0.00     | 0.00     | 0.00     | 0.00    | 0.00    |
| GH113      | 0.04      | 0.03      | 0.00      | 0.00      | 0.00      | 0.00      | 0.01      | 0.02      | 0.00      | 0.02      | 0.00     | 0.02     | 0.00     | 0.02     | 0.00    | 0.00    |
| GT5        | 0.40      | 0.25      | 0.23      | 0.27      | 0.14      | 0.25      | 0.45      | 0.48      | 0.27      | 0.39      | 0.23     | 0.33     | 0.31     | 0.31     | 0.29    | 0.42    |
| GH94       | 0.46      | 0.33      | 0.25      | 0.11      | 0.08      | 0.29      | 0.35      | 0.32      | 0.12      | 0.26      | 0.23     | 0.42     | 0.43     | 0.41     | 0.31    | 0.83    |
| GT66       | 0.00      | 0.00      | 0.00      | 0.00      | 0.00      | 0.00      | 0.00      | 0.00      | 0.00      | 0.00      | 0.00     | 0.00     | 0.00     | 0.00     | 0.02    | 0.00    |
| GT94       | 0.00      | 0.00      | 0.00      | 0.00      | 0.00      | 0.00      | 0.00      | 0.00      | 0.00      | 0.00      | 0.00     | 0.00     | 0.00     | 0.00     | 0.00    | 0.00    |
| GH58       | 0.00      | 0.00      | 0.00      | 0.00      | 0.00      | 0.00      | 0.00      | 0.00      | 0.00      | 0.00      | 0.00     | 0.00     | 0.00     | 0.00     | 0.00    | 0.00    |
| GH1        | 0.43      | 0.30      | 0.53      | 0.23      | 0.23      | 0.41      | 1.00      | 0.60      | 0.73      | 0.47      | 0.03     | 0.24     | 0.09     | 0.10     | 0.19    | 0.94    |
| PL22       | 0.00      | 0.00      | 0.02      | 0.00      | 0.00      | 0.00      | 0.00      | 0.00      | 0.00      | 0.00      | 0.00     | 0.00     | 0.02     | 0.00     | 0.00    | 0.00    |
| GT9        | 0.13      | 0.13      | 0.18      | 0.27      | 0.17      | 0.05      | 0.25      | 0.07      | 0.11      | 0.06      | 0.32     | 0.40     | 0.27     | 0.41     | 0.29    | 0.62    |

Normalized\_abundance\_2

| CAZY_group | CN-AD-135 | CN-AD-136 | CN-AD-137 | CN-AD-138 | CN-AD-139 | CN-AD-140 | CN-AD-141 | CN-AD-142 | CN-AD-143 | CN-AD-144 | IN-CH-17 | IN-CH-18 | IN-CH-19 | IN-CH-20 | IN-IN-2 | VE-AD-1 |
|------------|-----------|-----------|-----------|-----------|-----------|-----------|-----------|-----------|-----------|-----------|----------|----------|----------|----------|---------|---------|
| GT76       | 0.00      | 0.00      | 0.00      | 0.00      | 0.00      | 0.00      | 0.00      | 0.00      | 0.00      | 0.00      | 0.00     | 0.00     | 0.00     | 0.00     | 0.00    | 0.00    |
| GT32       | 0.03      | 0.09      | 0.08      | 0.06      | 0.04      | 0.02      | 0.07      | 0.02      | 0.14      | 0.13      | 0.03     | 0.09     | 0.04     | 0.12     | 0.06    | 0.10    |
| GT47       | 0.03      | 0.03      | 0.02      | 0.00      | 0.04      | 0.02      | 0.06      | 0.05      | 0.03      | 0.02      | 0.03     | 0.00     | 0.02     | 0.10     | 0.02    | 0.42    |
| GH84       | 0.09      | 0.13      | 0.10      | 0.17      | 0.19      | 0.11      | 0.23      | 0.05      | 0.19      | 0.08      | 0.19     | 0.18     | 0.25     | 0.18     | 0.06    | 0.31    |
| GH83       | 0.00      | 0.00      | 0.00      | 0.00      | 0.00      | 0.00      | 0.00      | 0.00      | 0.00      | 0.00      | 0.00     | 0.00     | 0.00     | 0.00     | 0.00    | 0.00    |
| GT59       | 0.00      | 0.00      | 0.00      | 0.00      | 0.00      | 0.00      | 0.00      | 0.00      | 0.00      | 0.00      | 0.00     | 0.00     | 0.00     | 0.00     | 0.00    | 0.00    |
| GH34       | 0.00      | 0.00      | 0.00      | 0.00      | 0.00      | 0.00      | 0.00      | 0.00      | 0.00      | 0.00      | 0.00     | 0.00     | 0.00     | 0.00     | 0.00    | 0.00    |
| GT14       | 0.04      | 0.03      | 0.03      | 0.04      | 0.06      | 0.05      | 0.01      | 0.00      | 0.01      | 0.03      | 0.00     | 0.04     | 0.05     | 0.04     | 0.00    | 0.00    |
| GH47       | 0.00      | 0.00      | 0.00      | 0.00      | 0.00      | 0.00      | 0.00      | 0.00      | 0.00      | 0.00      | 0.00     | 0.00     | 0.00     | 0.00     | 0.00    | 0.00    |
| GH97       | 0.45      | 0.70      | 0.56      | 0.71      | 0.79      | 0.59      | 0.25      | 0.09      | 0.67      | 0.87      | 1.06     | 1.30     | 1.40     | 1.18     | 0.91    | 1.25    |
| GH50       | 0.05      | 0.00      | 0.03      | 0.04      | 0.00      | 0.09      | 0.00      | 0.00      | 0.05      | 0.05      | 0.00     | 0.00     | 0.00     | 0.00     | 0.00    | 0.00    |
| GT26       | 0.18      | 0.16      | 0.17      | 0.19      | 0.10      | 0.25      | 0.15      | 0.23      | 0.14      | 0.18      | 0.26     | 0.24     | 0.23     | 0.28     | 0.17    | 0.52    |
| GH18       | 0.45      | 0.27      | 0.30      | 0.31      | 0.52      | 0.50      | 0.42      | 0.39      | 0.72      | 0.61      | 0.16     | 0.11     | 0.11     | 0.26     | 0.19    | 0.73    |
| GH37       | 0.00      | 0.00      | 0.12      | 0.00      | 0.00      | 0.02      | 0.04      | 0.00      | 0.03      | 0.03      | 0.00     | 0.04     | 0.00     | 0.00     | 0.00    | 0.10    |
| PL13       | 0.01      | 0.00      | 0.03      | 0.00      | 0.04      | 0.05      | 0.03      | 0.00      | 0.01      | 0.05      | 0.00     | 0.00     | 0.00     | 0.00     | 0.00    | 0.00    |
| GH27       | 0.13      | 0.06      | 0.07      | 0.15      | 0.14      | 0.13      | 0.09      | 0.02      | 0.23      | 0.19      | 0.16     | 0.22     | 0.23     | 0.22     | 0.15    | 0.31    |
| GT54       | 0.00      | 0.00      | 0.00      | 0.00      | 0.00      | 0.00      | 0.00      | 0.00      | 0.00      | 0.00      | 0.00     | 0.00     | 0.00     | 0.00     | 0.00    | 0.00    |
| GT91       | 0.00      | 0.00      | 0.00      | 0.00      | 0.00      | 0.00      | 0.00      | 0.00      | 0.00      | 0.00      | 0.00     | 0.00     | 0.00     | 0.00     | 0.00    | 0.00    |
| GT72       | 0.00      | 0.00      | 0.00      | 0.00      | 0.00      | 0.00      | 0.00      | 0.00      | 0.00      | 0.00      | 0.00     | 0.00     | 0.00     | 0.00     | 0.00    | 0.00    |
| GH67       | 0.04      | 0.03      | 0.10      | 0.02      | 0.04      | 0.07      | 0.00      | 0.02      | 0.10      | 0.06      | 0.16     | 0.29     | 0.25     | 0.22     | 0.12    | 0.21    |
| GH12       | 0.00      | 0.00      | 0.00      | 0.00      | 0.00      | 0.00      | 0.00      | 0.00      | 0.00      | 0.00      | 0.00     | 0.00     | 0.00     | 0.00     | 0.00    | 0.00    |
| GH91       | 0.03      | 0.02      | 0.03      | 0.02      | 0.00      | 0.00      | 0.00      | 0.00      | 0.04      | 0.03      | 0.00     | 0.00     | 0.00     | 0.00     | 0.00    | 0.00    |
| GT69       | 0.00      | 0.00      | 0.00      | 0.00      | 0.00      | 0.00      | 0.00      | 0.00      | 0.00      | 0.00      | 0.00     | 0.00     | 0.00     | 0.00     | 0.00    | 0.00    |
| GH106      | 0.11      | 0.21      | 0.28      | 0.15      | 0.25      | 0.22      | 0.13      | 0.11      | 0.19      | 0.13      | 0.10     | 0.20     | 0.16     | 0.28     | 0.21    | 0.21    |
| GT62       | 0.00      | 0.00      | 0.00      | 0.00      | 0.00      | 0.00      | 0.00      | 0.00      | 0.00      | 0.00      | 0.00     | 0.00     | 0.00     | 0.00     | 0.00    | 0.00    |
| GH17       | 0.00      | 0.00      | 0.00      | 0.00      | 0.00      | 0.00      | 0.00      | 0.00      | 0.00      | 0.00      | 0.00     | 0.00     | 0.00     | 0.00     | 0.00    | 0.00    |
| GH88       | 0.23      | 0.25      | 0.30      | 0.27      | 0.47      | 0.27      | 0.22      | 0.16      | 0.31      | 0.37      | 0.10     | 0.11     | 0.14     | 0.16     | 0.17    | 0.00    |
| CE5        | 0.00      | 0.00      | 0.00      | 0.00      | 0.00      | 0.00      | 0.00      | 0.00      | 0.00      | 0.00      | 0.00     | 0.00     | 0.00     | 0.00     | 0.00    | 0.00    |
| GT8        | 0.18      | 0.09      | 0.07      | 0.06      | 0.04      | 0.05      | 0.13      | 0.16      | 0.04      | 0.00      | 0.03     | 0.04     | 0.02     | 0.10     | 0.04    | 0.10    |
| GT50       | 0.00      | 0.00      | 0.00      | 0.00      | 0.00      | 0.00      | 0.00      | 0.00      | 0.00      | 0.00      | 0.00     | 0.00     | 0.00     | 0.00     | 0.00    | 0.00    |
| GT20       | 0.03      | 0.06      | 0.15      | 0.11      | 0.08      | 0.07      | 0.03      | 0.05      | 0.08      | 0.13      | 0.00     | 0.02     | 0.00     | 0.00     | 0.00    | 0.10    |
| PL9        | 0.09      | 0.09      | 0.26      | 0.06      | 0.06      | 0.06      | 0.05      | 0.19      | 0.07      | 0.08      | 0.06     | 0.00     | 0.00     | 0.07     | 0.06    | 0.00    |
| GH55       | 0.05      | 0.02      | 0.02      | 0.04      | 0.02      | 0.04      | 0.01      | 0.00      | 0.00      | 0.02      | 0.00     | 0.00     | 0.02     | 0.02     | 0.00    | 0.10    |
| GH64       | 0.00      | 0.00      | 0.00      | 0.00      | 0.00      | 0.00      | 0.00      | 0.00      | 0.00      | 0.00      | 0.00     | 0.00     | 0.00     | 0.00     | 0.00    | 0.00    |
| GH127      | 0.22      | 0.11      | 0.17      | 0.13      | 0.21      | 0.11      | 0.19      | 0.23      | 0.29      | 0.24      | 0.32     | 0.38     | 0.45     | 0.39     | 0.29    | 1.14    |
| GH103      | 0.03      | 0.00      | 0.03      | 0.00      | 0.00      | 0.00      | 0.06      | 0.00      | 0.01      | 0.02      | 0.00     | 0.04     | 0.04     | 0.00     | 0.00    | 0.21    |
| GH3        | 2.40      | 1.85      | 1.90      | 1.95      | 2.13      | 2.25      | 1.54      | 1.37      | 2.22      | 3.05      | 1.93     | 2.63     | 2.74     | 2.64     | 2.34    | 5.51    |
| GT45       | 0.00      | 0.00      | 0.00      | 0.00      | 0.00      | 0.00      | 0.00      | 0.00      | 0.00      | 0.00      | 0.00     | 0.00     | 0.00     | 0.00     | 0.00    | 0.00    |
| GT74       | 0.00      | 0.00      | 0.00      | 0.00      | 0.00      | 0.00      | 0.00      | 0.00      | 0.00      | 0.00      | 0.00     | 0.00     | 0.00     | 0.00     | 0.00    | 0.00    |
| GT90       | 0.00      | 0.00      | 0.00      | 0.00      | 0.00      | 0.00      | 0.00      | 0.00      | 0.00      | 0.00      | 0.00     | 0.00     | 0.00     | 0.00     | 0.00    | 0.00    |
| GH116      | 0.10      | 0.13      | 0.08      | 0.15      | 0.06      | 0.13      | 0.04      | 0.00      | 0.01      | 0.06      | 0.00     | 0.00     | 0.00     | 0.02     | 0.00    | 0.00    |
| GH31       | 0.89      | 0.71      | 0.97      | 0.92      | 0.83      | 0.84      | 0.71      | 0.76      | 0.92      | 0.98      | 1.00     | 0.84     | 1.01     | 0.77     | 0.89    | 2.49    |
| GT12       | 0.00      | 0.00      | 0.00      | 0.00      | 0.00      | 0.00      | 0.00      | 0.00      | 0.00      | 0.00      | 0.00     | 0.00     | 0.00     | 0.00     | 0.00    | 0.00    |
| CE1        | 0.28      | 0.25      | 0.36      | 0.38      | 0.27      | 0.29      | 0.35      | 0.18      | 0.33      | 0.37      | 0.19     | 0.35     | 0.23     | 0.26     | 0.25    | 0.83    |
| GH121      | 0.00      | 0.00      | 0.00      | 0.00      | 0.00      | 0.00      | 0.00      | 0.00      | 0.02      | 0.01      | 0.00     | 0.00     | 0.00     | 0.00     | 0.00    | 0.00    |
| GH79       | 0.00      | 0.02      | 0.00      | 0.00      | 0.00      | 0.00      | 0.00      | 0.00      | 0.00      | 0.00      | 0.00     | 0.00     | 0.00     | 0.00     | 0.00    | 0.21    |
| GT73       | 0.00      | 0.00      | 0.00      | 0.00      | 0.00      | 0.00      | 0.00      | 0.00      | 0.00      | 0.00      | 0.00     | 0.00     | 0.00     | 0.00     | 0.00    | 0.00    |
| GH77       | 0.63      | 0.63      | 0.50      | 0.36      | 0.37      | 0.50      | 0.64      | 0.53      | 0.37      | 0.48      | 0.39     | 0.44     | 0.45     | 0.55     | 0.41    | 2.18    |
| PL17       | 0.00      | 0.00      | 0.03      | 0.00      | 0.04      | 0.04      | 0.00      | 0.05      | 0.00      | 0.00      | 0.00     | 0.00     | 0.00     | 0.00     | 0.00    | 0.00    |
| PL8        | 0.20      | 0.13      | 0.25      | 0.32      | 0.25      | 0.25      | 0.10      | 0.00      | 0.29      | 0.16      | 0.00     | 0.13     | 0.02     | 0.12     | 0.08    | 0.21    |

## Normalized\_abundance\_2

| CAZY_group | CN-AD-135 | CN-AD-136 | CN-AD-137 | CN-AD-138 | CN-AD-139 | CN-AD-140 | CN-AD-141 | CN-AD-142 | CN-AD-143 | CN-AD-144 | IN-CH-17 | IN-CH-18 | IN-CH-19 | IN-CH-20 | IN-IN-2 | VE-AD-1 |
|------------|-----------|-----------|-----------|-----------|-----------|-----------|-----------|-----------|-----------|-----------|----------|----------|----------|----------|---------|---------|
| CE9        | 0.31      | 0.27      | 0.30      | 0.36      | 0.21      | 0.32      | 0.45      | 0.37      | 0.44      | 0.35      | 0.10     | 0.18     | 0.09     | 0.22     | 0.17    | 1.25    |
| CE15       | 0.00      | 0.03      | 0.02      | 0.02      | 0.04      | 0.00      | 0.00      | 0.00      | 0.01      | 0.02      | 0.00     | 0.00     | 0.00     | 0.02     | 0.00    | 0.10    |
| GT79       | 0.00      | 0.00      | 0.00      | 0.00      | 0.00      | 0.00      | 0.00      | 0.00      | 0.00      | 0.00      | 0.00     | 0.00     | 0.00     | 0.00     | 0.00    | 0.00    |
| GT10       | 0.00      | 0.05      | 0.03      | 0.04      | 0.00      | 0.00      | 0.00      | 0.00      | 0.00      | 0.00      | 0.00     | 0.00     | 0.00     | 0.00     | 0.02    | 0.00    |
| GH119      | 0.00      | 0.00      | 0.00      | 0.00      | 0.00      | 0.00      | 0.00      | 0.00      | 0.00      | 0.00      | 0.00     | 0.00     | 0.00     | 0.00     | 0.00    | 0.00    |
| GH16       | 0.09      | 0.17      | 0.13      | 0.27      | 0.21      | 0.23      | 0.06      | 0.02      | 0.19      | 0.18      | 0.13     | 0.20     | 0.16     | 0.26     | 0.21    | 0.10    |
| GH43       | 1.41      | 1.15      | 1.44      | 1.99      | 1.43      | 1.62      | 1.03      | 0.85      | 1.71      | 1.84      | 1.86     | 2.54     | 2.90     | 2.70     | 1.97    | 4.05    |
| GH51       | 0.38      | 0.40      | 0.30      | 0.34      | 0.45      | 0.31      | 0.26      | 0.43      | 0.34      | 0.45      | 0.64     | 0.84     | 0.88     | 0.94     | 0.83    | 1.35    |
| GT35       | 0.83      | 0.76      | 0.79      | 0.55      | 0.52      | 0.49      | 1.09      | 0.78      | 0.61      | 0.77      | 0.48     | 0.64     | 0.56     | 0.53     | 0.64    | 2.18    |
| GT25       | 0.05      | 0.00      | 0.02      | 0.00      | 0.00      | 0.00      | 0.03      | 0.00      | 0.00      | 0.00      | 0.00     | 0.00     | 0.00     | 0.00     | 0.00    | 0.00    |
| GT2        | 3.62      | 3.00      | 3.27      | 3.23      | 2.64      | 2.84      | 3.75      | 3.16      | 3.59      | 3.53      | 4.89     | 4.35     | 5.13     | 5.12     | 4.13    | 11.85   |
| GT51       | 0.72      | 0.60      | 0.79      | 0.55      | 0.72      | 0.68      | 0.95      | 0.69      | 0.72      | 0.84      | 0.96     | 1.17     | 1.13     | 1.18     | 0.93    | 3.33    |
| GH107      | 0.00      | 0.00      | 0.00      | 0.00      | 0.00      | 0.00      | 0.00      | 0.00      | 0.00      | 0.00      | 0.00     | 0.00     | 0.00     | 0.00     | 0.00    | 0.00    |
| GH7        | 0.00      | 0.00      | 0.00      | 0.00      | 0.00      | 0.00      | 0.00      | 0.00      | 0.00      | 0.00      | 0.00     | 0.00     | 0.00     | 0.00     | 0.00    | 0.00    |
| GT7        | 0.00      | 0.00      | 0.00      | 0.00      | 0.00      | 0.00      | 0.00      | 0.00      | 0.00      | 0.00      | 0.00     | 0.00     | 0.00     | 0.00     | 0.00    | 0.00    |
| GT36       | 0.00      | 0.00      | 0.00      | 0.00      | 0.00      | 0.00      | 0.00      | 0.00      | 0.00      | 0.00      | 0.00     | 0.00     | 0.00     | 0.00     | 0.00    | 0.00    |
| PL7        | 0.00      | 0.00      | 0.00      | 0.00      | 0.00      | 0.00      | 0.00      | 0.00      | 0.00      | 0.00      | 0.00     | 0.00     | 0.00     | 0.00     | 0.00    | 0.00    |
| GH110      | 0.04      | 0.14      | 0.10      | 0.17      | 0.16      | 0.02      | 0.07      | 0.02      | 0.10      | 0.10      | 0.06     | 0.04     | 0.09     | 0.04     | 0.10    | 0.00    |
| GT21       | 0.00      | 0.00      | 0.00      | 0.00      | 0.00      | 0.00      | 0.00      | 0.00      | 0.00      | 0.00      | 0.00     | 0.00     | 0.00     | 0.00     | 0.00    | 0.00    |
| GH62       | 0.00      | 0.00      | 0.00      | 0.00      | 0.00      | 0.00      | 0.00      | 0.00      | 0.00      | 0.00      | 0.00     | 0.00     | 0.00     | 0.00     | 0.00    | 0.00    |
| GH125      | 0.15      | 0.16      | 0.17      | 0.15      | 0.08      | 0.22      | 0.06      | 0.02      | 0.15      | 0.23      | 0.19     | 0.07     | 0.18     | 0.22     | 0.08    | 0.31    |
| GH117      | 0.08      | 0.06      | 0.07      | 0.10      | 0.10      | 0.05      | 0.06      | 0.00      | 0.10      | 0.05      | 0.00     | 0.00     | 0.00     | 0.02     | 0.02    | 0.00    |
| GH68       | 0.00      | 0.00      | 0.00      | 0.00      | 0.00      | 0.00      | 0.01      | 0.05      | 0.00      | 0.00      | 0.00     | 0.00     | 0.00     | 0.00     | 0.00    | 0.00    |
| GH85       | 0.01      | 0.02      | 0.00      | 0.02      | 0.00      | 0.00      | 0.01      | 0.05      | 0.00      | 0.00      | 0.00     | 0.09     | 0.04     | 0.18     | 0.00    | 0.21    |
| GH92       | 1.16      | 1.17      | 1.42      | 1.74      | 1.43      | 1.20      | 0.42      | 0.09      | 1.88      | 1.56      | 1.25     | 0.88     | 1.10     | 1.75     | 0.91    | 1.66    |
| GH40       | 0.00      | 0.00      | 0.00      | 0.00      | 0.00      | 0.00      | 0.00      | 0.00      | 0.00      | 0.00      | 0.00     | 0.00     | 0.00     | 0.00     | 0.00    | 0.00    |
| GT49       | 0.00      | 0.00      | 0.00      | 0.00      | 0.00      | 0.00      | 0.00      | 0.00      | 0.00      | 0.00      | 0.00     | 0.00     | 0.00     | 0.00     | 0.00    | 0.00    |
| GH112      | 0.22      | 0.16      | 0.12      | 0.10      | 0.08      | 0.18      | 0.17      | 0.18      | 0.15      | 0.16      | 0.03     | 0.07     | 0.05     | 0.02     | 0.08    | 0.31    |
| GT67       | 0.00      | 0.00      | 0.00      | 0.00      | 0.00      | 0.00      | 0.00      | 0.00      | 0.00      | 0.00      | 0.00     | 0.00     | 0.00     | 0.00     | 0.00    | 0.00    |
| CE8        | 0.24      | 0.05      | 0.30      | 0.21      | 0.14      | 0.16      | 0.32      | 0.07      | 0.18      | 0.08      | 0.10     | 0.38     | 0.23     | 0.14     | 0.17    | 0.21    |
| GT86       | 0.00      | 0.00      | 0.00      | 0.00      | 0.00      | 0.00      | 0.00      | 0.00      | 0.00      | 0.00      | 0.00     | 0.00     | 0.00     | 0.00     | 0.00    | 0.00    |
| GH101      | 0.01      | 0.00      | 0.00      | 0.04      | 0.00      | 0.00      | 0.06      | 0.00      | 0.01      | 0.02      | 0.00     | 0.00     | 0.00     | 0.00     | 0.00    | 0.00    |
| GH81       | 0.00      | 0.00      | 0.00      | 0.00      | 0.00      | 0.00      | 0.00      | 0.00      | 0.00      | 0.00      | 0.00     | 0.00     | 0.00     | 0.00     | 0.00    | 0.00    |
| GT93       | 0.00      | 0.00      | 0.00      | 0.00      | 0.00      | 0.00      | 0.00      | 0.00      | 0.00      | 0.00      | 0.00     | 0.00     | 0.00     | 0.00     | 0.00    | 0.00    |
| GT63       | 0.00      | 0.00      | 0.00      | 0.00      | 0.00      | 0.00      | 0.00      | 0.00      | 0.00      | 0.00      | 0.00     | 0.00     | 0.00     | 0.00     | 0.00    | 0.00    |
| CE11       | 0.17      | 0.14      | 0.20      | 0.17      | 0.21      | 0.07      | 0.19      | 0.07      | 0.18      | 0.13      | 0.39     | 0.35     | 0.45     | 0.41     | 0.35    | 0.42    |
| GT19       | 0.10      | 0.08      | 0.08      | 0.19      | 0.19      | 0.11      | 0.15      | 0.02      | 0.16      | 0.10      | 0.29     | 0.24     | 0.32     | 0.35     | 0.17    | 0.42    |
| GT33       | 0.00      | 0.00      | 0.00      | 0.00      | 0.00      | 0.00      | 0.00      | 0.00      | 0.00      | 0.00      | 0.00     | 0.00     | 0.00     | 0.00     | 0.00    | 0.00    |
| GH21       | 0.00      | 0.00      | 0.00      | 0.00      | 0.00      | 0.00      | 0.00      | 0.00      | 0.00      | 0.00      | 0.00     | 0.00     | 0.00     | 0.00     | 0.00    | 0.00    |
| GT68       | 0.00      | 0.00      | 0.00      | 0.00      | 0.00      | 0.00      | 0.00      | 0.00      | 0.00      | 0.00      | 0.00     | 0.00     | 0.00     | 0.00     | 0.00    | 0.00    |
| GH89       | 0.11      | 0.22      | 0.13      | 0.15      | 0.25      | 0.32      | 0.12      | 0.05      | 0.20      | 0.15      | 0.23     | 0.13     | 0.27     | 0.26     | 0.12    | 0.31    |
| GT82       | 0.00      | 0.00      | 0.00      | 0.02      | 0.00      | 0.00      | 0.00      | 0.00      | 0.00      | 0.00      | 0.00     | 0.00     | 0.00     | 0.00     | 0.00    | 0.00    |
| GH30       | 0.19      | 0.06      | 0.28      | 0.27      | 0.27      | 0.18      | 0.03      | 0.02      | 0.22      | 0.23      | 0.03     | 0.15     | 0.13     | 0.10     | 0.06    | 0.31    |
| GH20       | 0.64      | 0.95      | 0.74      | 1.13      | 1.01      | 0.93      | 0.48      | 0.30      | 1.10      | 0.97      | 0.90     | 1.13     | 1.13     | 0.94     | 1.02    | 0.94    |
| GH52       | 0.00      | 0.00      | 0.00      | 0.00      | 0.00      | 0.00      | 0.00      | 0.00      | 0.00      | 0.00      | 0.00     | 0.00     | 0.00     | 0.00     | 0.00    | 0.00    |
| GT84       | 0.00      | 0.00      | 0.00      | 0.00      | 0.00      | 0.00      | 0.00      | 0.00      | 0.00      | 0.00      | 0.00     | 0.00     | 0.00     | 0.00     | 0.00    | 0.00    |
| GT15       | 0.00      | 0.00      | 0.00      | 0.00      | 0.00      | 0.00      | 0.00      | 0.00      | 0.00      | 0.00      | 0.00     | 0.00     | 0.00     | 0.00     | 0.00    | 0.00    |
| GH93       | 0.00      | 0.00      | 0.00      | 0.00      | 0.00      | 0.02      | 0.00      | 0.00      | 0.00      | 0.03      | 0.00     | 0.00     | 0.00     | 0.00     | 0.00    | 0.00    |
| PL16       | 0.00      | 0.00      | 0.00      | 0.00      | 0.00      | 0.00      | 0.00      | 0.00      | 0.00      | 0.00      | 0.00     | 0.00     | 0.00     | 0.00     | 0.00    | 0.00    |
| GH26       | 0.06      | 0.06      | 0.08      | 0.11      | 0.04      | 0.04      | 0.01      | 0.07      | 0.03      | 0.10      | 0.00     | 0.07     | 0.04     | 0.04     | 0.02    | 0.31    |



Normalized\_abundance\_2

| CAZY_group | CN-AD-135 | CN-AD-136 | CN-AD-137 | CN-AD-138 | CN-AD-139 | CN-AD-140 | CN-AD-141 | CN-AD-142 | CN-AD-143 | CN-AD-144 | IN-CH-17 | IN-CH-18 | IN-CH-19 | IN-CH-20 | IN-IN-2 | VE-AD-1 |
|------------|-----------|-----------|-----------|-----------|-----------|-----------|-----------|-----------|-----------|-----------|----------|----------|----------|----------|---------|---------|
| GT75       | 0.00      | 0.00      | 0.00      | 0.00      | 0.00      | 0.00      | 0.00      | 0.00      | 0.00      | 0.00      | 0.00     | 0.00     | 0.00     | 0.00     | 0.00    | 0.00    |
| GH53       | 0.22      | 0.11      | 0.03      | 0.06      | 0.06      | 0.04      | 0.09      | 0.07      | 0.05      | 0.03      | 0.19     | 0.09     | 0.09     | 0.14     | 0.15    | 0.42    |
| GT88       | 0.00      | 0.00      | 0.00      | 0.00      | 0.00      | 0.00      | 0.00      | 0.00      | 0.00      | 0.00      | 0.00     | 0.00     | 0.00     | 0.00     | 0.00    | 0.00    |
| GT24       | 0.00      | 0.00      | 0.00      | 0.00      | 0.00      | 0.00      | 0.00      | 0.00      | 0.00      | 0.00      | 0.00     | 0.00     | 0.00     | 0.00     | 0.00    | 0.00    |
| GT81       | 0.00      | 0.00      | 0.00      | 0.00      | 0.00      | 0.00      | 0.00      | 0.00      | 0.00      | 0.00      | 0.00     | 0.00     | 0.00     | 0.00     | 0.00    | 0.00    |
| GH4        | 0.11      | 0.11      | 0.21      | 0.08      | 0.06      | 0.16      | 0.38      | 0.23      | 0.20      | 0.19      | 0.00     | 0.13     | 0.00     | 0.00     | 0.06    | 0.62    |
| GT78       | 0.00      | 0.00      | 0.00      | 0.00      | 0.00      | 0.00      | 0.00      | 0.00      | 0.00      | 0.00      | 0.00     | 0.00     | 0.00     | 0.00     | 0.00    | 0.00    |
| GH8        | 0.06      | 0.02      | 0.07      | 0.00      | 0.02      | 0.00      | 0.07      | 0.05      | 0.01      | 0.00      | 0.00     | 0.09     | 0.11     | 0.08     | 0.04    | 0.00    |
| GH70       | 0.00      | 0.00      | 0.00      | 0.00      | 0.00      | 0.00      | 0.23      | 0.21      | 0.00      | 0.00      | 0.00     | 0.00     | 0.02     | 0.00     | 0.00    | 0.00    |
| GH122      | 0.00      | 0.00      | 0.00      | 0.00      | 0.00      | 0.00      | 0.00      | 0.00      | 0.00      | 0.00      | 0.00     | 0.00     | 0.00     | 0.00     | 0.00    | 0.00    |
| GH74       | 0.05      | 0.00      | 0.00      | 0.04      | 0.00      | 0.00      | 0.00      | 0.07      | 0.00      | 0.02      | 0.00     | 0.00     | 0.00     | 0.00     | 0.00    | 0.00    |
| GT41       | 0.03      | 0.00      | 0.00      | 0.00      | 0.00      | 0.00      | 0.03      | 0.02      | 0.00      | 0.00      | 0.00     | 0.00     | 0.00     | 0.00     | 0.02    | 0.10    |
| PL1        | 0.15      | 0.14      | 0.28      | 0.36      | 0.25      | 0.31      | 0.31      | 0.11      | 0.29      | 0.19      | 0.03     | 0.24     | 0.18     | 0.30     | 0.10    | 0.31    |
| GH15       | 0.03      | 0.03      | 0.08      | 0.02      | 0.00      | 0.02      | 0.00      | 0.02      | 0.04      | 0.06      | 0.00     | 0.00     | 0.00     | 0.00     | 0.02    | 0.00    |
| GH32       | 0.43      | 0.24      | 0.25      | 0.32      | 0.31      | 0.22      | 0.86      | 0.60      | 0.64      | 0.63      | 0.55     | 0.62     | 0.81     | 0.75     | 0.60    | 0.73    |
| GH44       | 0.00      | 0.00      | 0.00      | 0.00      | 0.00      | 0.00      | 0.00      | 0.00      | 0.00      | 0.00      | 0.00     | 0.00     | 0.00     | 0.00     | 0.00    | 0.00    |
| GT6        | 0.00      | 0.00      | 0.00      | 0.00      | 0.00      | 0.00      | 0.00      | 0.00      | 0.00      | 0.02      | 0.00     | 0.00     | 0.00     | 0.00     | 0.00    | 0.00    |
| GH13       | 2.99      | 2.17      | 2.10      | 2.12      | 1.80      | 1.96      | 3.10      | 3.34      | 2.15      | 2.90      | 1.96     | 2.90     | 2.48     | 2.56     | 2.45    | 8.73    |
| GT80       | 0.00      | 0.00      | 0.05      | 0.00      | 0.00      | 0.00      | 0.00      | 0.00      | 0.00      | 0.02      | 0.00     | 0.02     | 0.04     | 0.00     | 0.00    | 0.00    |
| GH71       | 0.00      | 0.00      | 0.00      | 0.00      | 0.00      | 0.00      | 0.00      | 0.00      | 0.00      | 0.00      | 0.00     | 0.00     | 0.00     | 0.00     | 0.00    | 0.00    |
| GH63       | 0.03      | 0.13      | 0.13      | 0.08      | 0.10      | 0.07      | 0.12      | 0.02      | 0.12      | 0.08      | 0.03     | 0.11     | 0.04     | 0.08     | 0.02    | 0.10    |
| PL21       | 0.04      | 0.05      | 0.03      | 0.08      | 0.00      | 0.00      | 0.01      | 0.00      | 0.03      | 0.00      | 0.00     | 0.00     | 0.00     | 0.00     | 0.00    | 0.00    |
| GH65       | 0.17      | 0.05      | 0.08      | 0.11      | 0.06      | 0.07      | 0.09      | 0.09      | 0.12      | 0.19      | 0.03     | 0.07     | 0.02     | 0.04     | 0.04    | 0.42    |
| CE4        | 0.60      | 0.32      | 0.33      | 0.31      | 0.31      | 0.32      | 0.87      | 0.50      | 0.39      | 0.40      | 0.26     | 0.42     | 0.29     | 0.35     | 0.33    | 1.14    |
| CE14       | 0.00      | 0.00      | 0.03      | 0.00      | 0.00      | 0.00      | 0.01      | 0.00      | 0.03      | 0.02      | 0.00     | 0.00     | 0.00     | 0.00     | 0.04    | 0.10    |
| GH115      | 0.17      | 0.05      | 0.13      | 0.17      | 0.19      | 0.32      | 0.04      | 0.07      | 0.30      | 0.19      | 0.23     | 0.22     | 0.25     | 0.22     | 0.25    | 0.73    |
| GH104      | 0.00      | 0.00      | 0.00      | 0.00      | 0.00      | 0.02      | 0.00      | 0.00      | 0.00      | 0.00      | 0.00     | 0.04     | 0.02     | 0.00     | 0.00    | 0.00    |
| GH111      | 0.00      | 0.00      | 0.00      | 0.00      | 0.00      | 0.00      | 0.00      | 0.00      | 0.00      | 0.00      | 0.00     | 0.00     | 0.00     | 0.00     | 0.00    | 0.00    |
| GH95       | 0.40      | 0.35      | 0.36      | 0.53      | 0.45      | 0.50      | 0.25      | 0.16      | 0.57      | 0.58      | 0.84     | 0.75     | 0.83     | 0.83     | 0.58    | 1.14    |
| GT70       | 0.00      | 0.00      | 0.00      | 0.00      | 0.00      | 0.00      | 0.00      | 0.00      | 0.00      | 0.00      | 0.00     | 0.00     | 0.00     | 0.00     | 0.00    | 0.00    |
| CE10       | 0.13      | 0.09      | 0.18      | 0.13      | 0.16      | 0.18      | 0.12      | 0.16      | 0.14      | 0.10      | 0.06     | 0.15     | 0.05     | 0.10     | 0.02    | 0.31    |
| GH10       | 0.18      | 0.05      | 0.05      | 0.06      | 0.06      | 0.11      | 0.03      | 0.11      | 0.04      | 0.08      | 0.10     | 0.27     | 0.16     | 0.16     | 0.10    | 0.31    |
| GH130      | 0.23      | 0.16      | 0.17      | 0.21      | 0.21      | 0.25      | 0.16      | 0.16      | 0.19      | 0.26      | 0.26     | 0.24     | 0.29     | 0.28     | 0.21    | 0.52    |
| PL20       | 0.00      | 0.00      | 0.00      | 0.00      | 0.00      | 0.00      | 0.00      | 0.00      | 0.00      | 0.00      | 0.00     | 0.00     | 0.00     | 0.00     | 0.00    | 0.00    |
| GH69       | 0.00      | 0.00      | 0.00      | 0.00      | 0.00      | 0.00      | 0.00      | 0.00      | 0.00      | 0.00      | 0.00     | 0.00     | 0.00     | 0.00     | 0.00    | 0.00    |
| PL2        | 0.00      | 0.00      | 0.00      | 0.02      | 0.04      | 0.00      | 0.01      | 0.00      | 0.00      | 0.00      | 0.00     | 0.00     | 0.00     | 0.00     | 0.00    | 0.00    |
| GH49       | 0.00      | 0.00      | 0.00      | 0.00      | 0.00      | 0.00      | 0.00      | 0.00      | 0.00      | 0.00      | 0.00     | 0.00     | 0.00     | 0.00     | 0.00    | 0.00    |
| GH25       | 0.40      | 0.17      | 0.26      | 0.32      | 0.16      | 0.31      | 0.57      | 0.64      | 0.34      | 0.26      | 0.90     | 0.66     | 0.97     | 0.73     | 0.79    | 2.49    |
| GH59       | 0.00      | 0.00      | 0.00      | 0.00      | 0.00      | 0.02      | 0.00      | 0.00      | 0.00      | 0.00      | 0.00     | 0.00     | 0.00     | 0.00     | 0.00    | 0.00    |
| GH35       | 0.22      | 0.24      | 0.35      | 0.27      | 0.39      | 0.27      | 0.12      | 0.07      | 0.42      | 0.31      | 0.19     | 0.40     | 0.27     | 0.49     | 0.25    | 0.21    |
| GT39       | 0.00      | 0.00      | 0.00      | 0.00      | 0.00      | 0.00      | 0.00      | 0.00      | 0.00      | 0.00      | 0.00     | 0.00     | 0.00     | 0.00     | 0.00    | 0.00    |
| GT57       | 0.00      | 0.00      | 0.00      | 0.00      | 0.00      | 0.00      | 0.00      | 0.00      | 0.00      | 0.00      | 0.00     | 0.00     | 0.00     | 0.00     | 0.00    | 0.00    |
| GH129      | 0.00      | 0.00      | 0.00      | 0.00      | 0.00      | 0.00      | 0.00      | 0.00      | 0.04      | 0.02      | 0.00     | 0.00     | 0.00     | 0.00     | 0.02    | 0.00    |
| GT22       | 0.00      | 0.00      | 0.00      | 0.00      | 0.00      | 0.00      | 0.00      | 0.00      | 0.00      | 0.00      | 0.00     | 0.00     | 0.00     | 0.00     | 0.00    | 0.00    |
| PL12       | 0.04      | 0.05      | 0.07      | 0.13      | 0.10      | 0.13      | 0.06      | 0.00      | 0.08      | 0.16      | 0.00     | 0.02     | 0.04     | 0.02     | 0.04    | 0.00    |
| PL18       | 0.00      | 0.00      | 0.00      | 0.00      | 0.00      | 0.00      | 0.00      | 0.00      | 0.00      | 0.00      | 0.00     | 0.00     | 0.00     | 0.00     | 0.00    | 0.00    |
| GT92       | 0.00      | 0.00      | 0.00      | 0.00      | 0.00      | 0.00      | 0.00      | 0.00      | 0.00      | 0.00      | 0.00     | 0.00     | 0.00     | 0.00     | 0.00    | 0.00    |
| GT44       | 0.00      | 0.00      | 0.00      | 0.00      | 0.00      | 0.00      | 0.00      | 0.00      | 0.00      | 0.00      | 0.00     | 0.00     | 0.00     | 0.00     | 0.00    | 0.00    |
| GT29       | 0.00      | 0.00      | 0.00      | 0.00      | 0.00      | 0.00      | 0.00      | 0.00      | 0.00      | 0.00      | 0.00     | 0.00     | 0.00     | 0.00     | 0.00    | 0.00    |
| GT13       | 0.00      | 0.00      | 0.00      | 0.00      | 0.00      | 0.00      | 0.00      | 0.00      | 0.00      | 0.00      | 0.00     | 0.00     | 0.00     | 0.00     | 0.00    | 0.00    |

Normalized\_abundance\_2

| CAZY_group | CN-AD-135 | CN-AD-136 | CN-AD-137 | CN-AD-138 | CN-AD-139 | CN-AD-140 | CN-AD-141 | CN-AD-142 | CN-AD-143 | CN-AD-144 | IN-CH-17 | IN-CH-18 | IN-CH-19 | IN-CH-20 | IN-IN-2 | VE-AD-1 |
|------------|-----------|-----------|-----------|-----------|-----------|-----------|-----------|-----------|-----------|-----------|----------|----------|----------|----------|---------|---------|
| GT52       | 0.00      | 0.00      | 0.00      | 0.00      | 0.00      | 0.00      | 0.00      | 0.00      | 0.00      | 0.00      | 0.00     | 0.00     | 0.00     | 0.00     | 0.00    | 0.00    |
| GT64       | 0.00      | 0.00      | 0.00      | 0.00      | 0.00      | 0.00      | 0.00      | 0.00      | 0.00      | 0.00      | 0.00     | 0.00     | 0.00     | 0.00     | 0.00    | 0.00    |
| GT85       | 0.00      | 0.00      | 0.00      | 0.00      | 0.00      | 0.00      | 0.00      | 0.00      | 0.00      | 0.00      | 0.00     | 0.00     | 0.00     | 0.00     | 0.00    | 0.00    |
| GT16       | 0.00      | 0.00      | 0.00      | 0.00      | 0.00      | 0.00      | 0.00      | 0.00      | 0.00      | 0.00      | 0.00     | 0.00     | 0.00     | 0.00     | 0.00    | 0.00    |
| GH56       | 0.00      | 0.00      | 0.00      | 0.00      | 0.00      | 0.00      | 0.00      | 0.00      | 0.00      | 0.00      | 0.00     | 0.00     | 0.00     | 0.00     | 0.00    | 0.00    |
| GT60       | 0.00      | 0.00      | 0.00      | 0.00      | 0.00      | 0.00      | 0.00      | 0.00      | 0.00      | 0.00      | 0.00     | 0.00     | 0.00     | 0.00     | 0.00    | 0.00    |
| GH41       | 0.00      | 0.00      | 0.00      | 0.00      | 0.00      | 0.00      | 0.00      | 0.00      | 0.00      | 0.00      | 0.00     | 0.00     | 0.00     | 0.00     | 0.00    | 0.00    |
| CE7        | 0.09      | 0.08      | 0.12      | 0.13      | 0.10      | 0.13      | 0.03      | 0.02      | 0.15      | 0.15      | 0.23     | 0.18     | 0.29     | 0.18     | 0.17    | 0.00    |
| GH39       | 0.05      | 0.03      | 0.03      | 0.02      | 0.00      | 0.09      | 0.09      | 0.05      | 0.01      | 0.05      | 0.00     | 0.02     | 0.04     | 0.04     | 0.00    | 0.10    |
| GT30       | 0.24      | 0.25      | 0.33      | 0.32      | 0.27      | 0.18      | 0.17      | 0.09      | 0.27      | 0.21      | 0.29     | 0.44     | 0.36     | 0.47     | 0.46    | 0.52    |
| PL15       | 0.09      | 0.00      | 0.12      | 0.08      | 0.14      | 0.09      | 0.00      | 0.00      | 0.12      | 0.15      | 0.03     | 0.04     | 0.05     | 0.08     | 0.06    | 0.00    |
| GH102      | 0.06      | 0.02      | 0.08      | 0.02      | 0.00      | 0.05      | 0.09      | 0.00      | 0.03      | 0.03      | 0.00     | 0.04     | 0.04     | 0.02     | 0.00    | 0.21    |

## Normalized\_abundance\_2

| CAZY_group | VE-AD-2 | VE-AD-3 | VE-AD-4 | VE-AD-5 | VE-AD-6 | VE-CH-1 | VE-CH-2 | VE-CH-3 | VE-CH-4 | VE-CH-5 | VE-CH-6 | VE-IN-1 | VE-IN-2 | VE-IN-3 | VE-IN-4 | VE-IN-5 |
|------------|---------|---------|---------|---------|---------|---------|---------|---------|---------|---------|---------|---------|---------|---------|---------|---------|
| GH29       | 1.11    | 1.25    | 1.29    | 0.81    | 1.00    | 1.24    | 1.25    | 1.02    | 0.59    | 1.62    | 3.38    | 3.32    | 0.98    | 5.16    | 3.27    | 2.22    |
| PL4        | 0.00    | 0.00    | 0.01    | 0.00    | 0.00    | 0.00    | 0.00    | 0.00    | 0.00    | 0.00    | 0.00    | 0.00    | 0.00    | 0.00    | 0.00    | 0.00    |
| GH23       | 2.09    | 3.02    | 2.17    | 2.07    | 2.90    | 2.38    | 2.15    | 3.13    | 1.63    | 3.74    | 2.76    | 2.43    | 4.23    | 3.66    | 3.51    | 2.91    |
| CE6        | 0.22    | 0.40    | 0.03    | 0.49    | 0.39    | 0.12    | 0.51    | 0.25    | 0.42    | 0.01    | 0.00    | 0.00    | 0.00    | 0.00    | 0.08    | 0.23    |
| GH72       | 0.44    | 0.61    | 0.69    | 0.67    | 0.45    | 0.60    | 0.43    | 0.43    | 0.50    | 0.59    | 0.52    | 0.32    | 0.16    | 0.48    | 0.45    | 0.62    |
| GH114      | 0.00    | 0.00    | 0.00    | 0.00    | 0.00    | 0.00    | 0.00    | 0.00    | 0.00    | 0.00    | 0.00    | 0.00    | 0.00    | 0.00    | 0.00    | 0.00    |
| GH78       | 0.55    | 0.91    | 2.38    | 0.64    | 1.06    | 1.65    | 1.02    | 0.54    | 0.67    | 0.31    | 0.05    | 0.09    | 0.00    | 0.02    | 1.60    | 1.77    |
| PL19       | 0.00    | 0.00    | 0.00    | 0.00    | 0.00    | 0.00    | 0.00    | 0.00    | 0.00    | 0.00    | 0.00    | 0.00    | 0.00    | 0.00    | 0.00    | 0.00    |
| GT27       | 0.00    | 0.00    | 0.00    | 0.00    | 0.00    | 0.00    | 0.00    | 0.00    | 0.00    | 0.00    | 0.00    | 0.00    | 0.00    | 0.00    | 0.00    | 0.00    |
| GH5        | 0.89    | 1.46    | 0.74    | 1.51    | 1.04    | 0.83    | 1.49    | 0.98    | 1.21    | 0.60    | 1.24    | 2.18    | 1.14    | 2.86    | 0.81    | 1.00    |
| GT40       | 0.00    | 0.00    | 0.00    | 0.00    | 0.00    | 0.00    | 0.00    | 0.00    | 0.00    | 0.00    | 0.00    | 0.00    | 0.00    | 0.00    | 0.00    | 0.00    |
| CE13       | 0.00    | 0.00    | 0.00    | 0.00    | 0.00    | 0.00    | 0.00    | 0.00    | 0.00    | 0.00    | 0.00    | 0.01    | 0.00    | 0.00    | 0.00    | 0.00    |
| GT37       | 0.00    | 0.00    | 0.00    | 0.00    | 0.00    | 0.00    | 0.00    | 0.00    | 0.00    | 0.00    | 0.00    | 0.00    | 0.00    | 0.00    | 0.00    | 0.00    |
| GH33       | 0.16    | 0.04    | 0.59    | 0.09    | 0.13    | 0.43    | 0.08    | 0.30    | 0.17    | 3.50    | 5.18    | 3.38    | 1.14    | 4.85    | 1.75    | 2.39    |
| GT65       | 0.00    | 0.00    | 0.00    | 0.00    | 0.00    | 0.00    | 0.00    | 0.00    | 0.00    | 0.00    | 0.00    | 0.01    | 0.00    | 0.00    | 0.00    | 0.00    |
| GH86       | 0.00    | 0.00    | 0.07    | 0.06    | 0.00    | 0.02    | 0.00    | 0.00    | 0.00    | 0.00    | 0.00    | 0.00    | 0.00    | 0.00    | 0.00    | 0.00    |
| GH123      | 0.22    | 0.25    | 0.25    | 0.12    | 0.17    | 0.13    | 0.08    | 0.11    | 0.13    | 0.00    | 0.00    | 0.00    | 0.00    | 0.00    | 0.81    | 0.14    |
| GH96       | 0.00    | 0.00    | 0.00    | 0.00    | 0.00    | 0.00    | 0.00    | 0.00    | 0.00    | 0.00    | 0.00    | 0.00    | 0.00    | 0.00    | 0.00    | 0.00    |
| GH14       | 0.00    | 0.00    | 0.00    | 0.00    | 0.00    | 0.00    | 0.00    | 0.00    | 0.00    | 0.00    | 0.00    | 0.00    | 0.00    | 0.00    | 0.00    | 0.00    |
| CE3        | 0.00    | 0.00    | 0.00    | 0.03    | 0.00    | 0.01    | 0.00    | 0.00    | 0.00    | 0.00    | 0.00    | 0.00    | 0.00    | 0.00    | 0.00    | 0.00    |
| PL10       | 0.40    | 0.27    | 0.05    | 0.35    | 0.15    | 0.15    | 0.24    | 0.30    | 0.17    | 0.00    | 0.01    | 0.00    | 0.00    | 0.00    | 0.08    | 0.05    |
| GT48       | 0.00    | 0.00    | 0.00    | 0.00    | 0.00    | 0.00    | 0.00    | 0.00    | 0.00    | 0.00    | 0.00    | 0.00    | 0.00    | 0.00    | 0.00    | 0.00    |
| PL6        | 0.00    | 0.00    | 0.00    | 0.00    | 0.00    | 0.00    | 0.00    | 0.00    | 0.00    | 0.00    | 0.00    | 0.00    | 0.00    | 0.00    | 0.00    | 0.00    |
| GT83       | 0.29    | 0.34    | 0.25    | 0.32    | 0.39    | 0.20    | 0.31    | 0.41    | 0.21    | 0.08    | 0.05    | 0.00    | 0.33    | 0.10    | 0.65    | 0.83    |
| GH126      | 0.00    | 0.00    | 0.00    | 0.00    | 0.00    | 0.00    | 0.00    | 0.00    | 0.00    | 0.08    | 0.00    | 0.00    | 0.16    | 0.00    | 0.00    | 0.00    |
| GH9        | 0.13    | 0.46    | 0.47    | 1.22    | 0.52    | 0.72    | 0.71    | 0.25    | 0.50    | 0.00    | 0.01    | 0.00    | 0.16    | 0.00    | 0.03    | 0.09    |
| GH75       | 0.00    | 0.00    | 0.00    | 0.00    | 0.00    | 0.00    | 0.00    | 0.00    | 0.00    | 0.00    | 0.00    | 0.00    | 0.00    | 0.00    | 0.00    | 0.00    |
| GT71       | 0.00    | 0.00    | 0.00    | 0.00    | 0.00    | 0.00    | 0.00    | 0.00    | 0.00    | 0.00    | 0.00    | 0.00    | 0.00    | 0.00    | 0.00    | 0.00    |
| GH46       | 0.00    | 0.00    | 0.01    | 0.00    | 0.00    | 0.01    | 0.00    | 0.02    | 0.00    | 0.00    | 0.00    | 0.00    | 0.00    | 0.00    | 0.00    | 0.00    |
| GT61       | 0.00    | 0.00    | 0.00    | 0.00    | 0.00    | 0.00    | 0.00    | 0.00    | 0.00    | 0.00    | 0.00    | 0.00    | 0.00    | 0.00    | 0.00    | 0.00    |
| GT3        | 0.51    | 0.49    | 0.90    | 0.32    | 0.35    | 0.93    | 0.74    | 0.38    | 0.33    | 0.00    | 0.02    | 0.00    | 0.00    | 0.00    | 0.39    | 0.42    |
| PL3        | 0.00    | 0.00    | 0.00    | 0.00    | 0.00    | 0.00    | 0.00    | 0.00    | 0.00    | 0.00    | 0.00    | 0.00    | 0.00    | 0.00    | 0.00    | 0.00    |
| GH108      | 0.04    | 0.11    | 0.02    | 0.12    | 0.00    | 0.03    | 0.00    | 0.23    | 0.00    | 0.00    | 0.01    | 0.00    | 0.16    | 0.00    | 0.00    | 0.00    |
| GT56       | 0.09    | 0.00    | 0.00    | 0.00    | 0.02    | 0.00    | 0.00    | 0.29    | 0.04    | 0.05    | 0.00    | 0.00    | 0.00    | 0.10    | 0.03    | 0.03    |
| PL11       | 0.55    | 0.15    | 0.05    | 0.26    | 0.24    | 0.09    | 0.43    | 0.16    | 0.29    | 0.00    | 0.01    | 0.00    | 0.00    | 0.02    | 0.13    | 0.45    |
| GH45       | 0.00    | 0.00    | 0.01    | 0.00    | 0.00    | 0.00    | 0.00    | 0.00    | 0.00    | 0.00    | 0.00    | 0.00    | 0.00    | 0.00    | 0.00    | 0.00    |
| GT34       | 0.00    | 0.00    | 0.00    | 0.00    | 0.00    | 0.00    | 0.00    | 0.02    | 0.04    | 0.02    | 0.01    | 0.00    | 0.00    | 0.04    | 0.00    | 0.02    |
| PL14       | 0.00    | 0.00    | 0.00    | 0.00    | 0.00    | 0.00    | 0.00    | 0.00    | 0.00    | 0.00    | 0.00    | 0.00    | 0.00    | 0.00    | 0.00    | 0.00    |
| GH19       | 0.00    | 0.06    | 0.04    | 0.09    | 0.04    | 0.03    | 0.00    | 0.07    | 0.00    | 0.02    | 0.00    | 0.00    | 0.16    | 0.02    | 0.03    | 0.02    |
| GH118      | 0.00    | 0.00    | 0.00    | 0.00    | 0.00    | 0.00    | 0.00    | 0.00    | 0.00    | 0.00    | 0.00    | 0.00    | 0.00    | 0.00    | 0.00    | 0.00    |
| GH82       | 0.00    | 0.00    | 0.00    | 0.00    | 0.00    | 0.00    | 0.00    | 0.00    | 0.00    | 0.00    | 0.00    | 0.00    | 0.00    | 0.00    | 0.00    | 0.00    |
| GH76       | 0.00    | 0.02    | 0.16    | 0.00    | 0.06    | 0.10    | 0.00    | 0.02    | 0.04    | 0.00    | 0.00    | 0.00    | 0.00    | 0.00    | 1.00    | 0.78    |
| GT4        | 3.48    | 4.67    | 3.78    | 5.06    | 4.81    | 3.44    | 3.60    | 3.44    | 3.26    | 7.02    | 7.11    | 5.09    | 3.58    | 8.26    | 8.46    | 6.04    |
| GT87       | 0.00    | 0.00    | 0.01    | 0.00    | 0.00    | 0.00    | 0.04    | 0.02    | 0.00    | 0.02    | 0.01    | 0.03    | 0.00    | 0.02    | 0.03    | 0.00    |
| GH24       | 0.80    | 0.42    | 0.18    | 0.15    | 0.37    | 0.26    | 0.27    | 0.47    | 0.25    | 0.05    | 0.04    | 0.03    | 0.65    | 0.08    | 0.13    | 0.33    |
| GH90       | 0.00    | 0.00    | 0.00    | 0.00    | 0.00    | 0.00    | 0.00    | 0.00    | 0.00    | 0.00    | 0.00    | 0.00    | 0.00    | 0.00    | 0.00    | 0.00    |
| GH57       | 0.44    | 0.46    | 0.33    | 0.47    | 0.43    | 0.39    | 0.39    | 0.30    | 0.38    | 0.00    | 0.01    | 0.00    | 0.16    | 0.00    | 0.39    | 0.16    |
| GH36       | 2.17    | 1.58    | 1.43    | 2.44    | 2.43    | 1.52    | 2.23    | 1.25    | 1.59    | 3.73    | 2.53    | 1.87    | 0.49    | 2.82    | 3.17    | 2.29    |
| GT46       | 0.00    | 0.00    | 0.00    | 0.00    | 0.00    | 0.00    | 0.00    | 0.00    | 0.00    | 0.00    | 0.00    | 0.00    | 0.00    | 0.00    | 0.00    | 0.00    |
| GH66       | 0.11    | 0.44    | 0.17    | 0.29    | 0.17    | 0.11    | 0.24    | 0.23    | 0.13    | 0.27    | 0.12    | 0.00    | 0.00    | 0.00    | 0.10    | 0.17    |

Normalized\_abundance\_2

| CAZY_group | VE-AD-2 | VE-AD-3 | VE-AD-4 | VE-AD-5 | VE-AD-6 | VE-CH-1 | VE-CH-2 | VE-CH-3 | VE-CH-4 | VE-CH-5 | VE-CH-6 | VE-IN-1 | VE-IN-2 | VE-IN-3 | VE-IN-4 | VE-IN-5 |
|------------|---------|---------|---------|---------|---------|---------|---------|---------|---------|---------|---------|---------|---------|---------|---------|---------|
| GH48       | 0.00    | 0.02    | 0.02    | 0.02    | 0.03    | 0.02    | 0.00    | 0.00    | 0.02    | 0.04    | 0.00    | 0.00    | 0.00    | 0.00    | 0.00    | 0.00    |
| GT53       | 0.00    | 0.00    | 0.00    | 0.00    | 0.00    | 0.00    | 0.00    | 0.00    | 0.00    | 0.00    | 0.00    | 0.00    | 0.00    | 0.00    | 0.00    | 0.00    |
| GH60       | 0.00    | 0.00    | 0.00    | 0.00    | 0.00    | 0.00    | 0.00    | 0.00    | 0.00    | 0.00    | 0.00    | 0.00    | 0.00    | 0.00    | 0.00    | 0.00    |
| GT31       | 0.00    | 0.00    | 0.00    | 0.00    | 0.00    | 0.00    | 0.00    | 0.04    | 0.09    | 0.00    | 0.00    | 0.01    | 0.00    | 0.00    | 0.00    | 0.00    |
| GH105      | 1.53    | 1.20    | 0.31    | 0.93    | 1.30    | 0.36    | 0.90    | 0.54    | 0.79    | 0.03    | 0.06    | 0.06    | 0.00    | 0.00    | 0.92    | 0.99    |
| GT23       | 0.00    | 0.00    | 0.00    | 0.00    | 0.00    | 0.00    | 0.00    | 0.00    | 0.00    | 0.00    | 0.00    | 0.00    | 0.00    | 0.00    | 0.00    | 0.00    |
| GH11       | 0.00    | 0.02    | 0.01    | 0.03    | 0.00    | 0.01    | 0.00    | 0.00    | 0.00    | 0.00    | 0.00    | 0.00    | 0.00    | 0.00    | 0.00    | 0.00    |
| GT38       | 0.00    | 0.00    | 0.00    | 0.00    | 0.00    | 0.00    | 0.00    | 0.00    | 0.00    | 0.00    | 0.00    | 0.00    | 0.00    | 0.00    | 0.00    | 0.00    |
| GT43       | 0.00    | 0.00    | 0.00    | 0.00    | 0.00    | 0.00    | 0.00    | 0.00    | 0.00    | 0.00    | 0.00    | 0.00    | 0.00    | 0.00    | 0.00    | 0.00    |
| GH99       | 0.04    | 0.00    | 0.00    | 0.03    | 0.00    | 0.02    | 0.00    | 0.04    | 0.00    | 0.00    | 0.00    | 0.00    | 0.00    | 0.00    | 0.00    | 0.02    |
| GH38       | 0.02    | 0.15    | 0.59    | 0.35    | 0.39    | 0.46    | 0.16    | 0.30    | 0.33    | 0.64    | 3.22    | 2.72    | 1.79    | 6.21    | 1.73    | 0.71    |
| GH109      | 0.84    | 0.34    | 0.31    | 0.35    | 0.35    | 0.43    | 0.74    | 0.21    | 0.17    | 0.00    | 0.01    | 0.00    | 0.00    | 0.00    | 0.73    | 0.33    |
| GH2        | 9.79    | 9.97    | 6.44    | 10.07   | 10.22   | 6.24    | 11.12   | 8.14    | 7.11    | 7.86    | 7.54    | 4.05    | 3.74    | 7.13    | 17.39   | 10.75   |
| GT28       | 0.84    | 0.99    | 0.84    | 0.96    | 1.21    | 1.02    | 1.10    | 1.07    | 0.50    | 1.35    | 1.54    | 1.04    | 0.49    | 1.88    | 1.07    | 1.30    |
| GH42       | 0.24    | 0.40    | 0.18    | 0.32    | 0.32    | 0.27    | 0.43    | 0.13    | 0.46    | 3.38    | 4.22    | 3.86    | 1.79    | 5.94    | 0.65    | 1.82    |
| GT58       | 0.00    | 0.00    | 0.00    | 0.00    | 0.00    | 0.00    | 0.00    | 0.00    | 0.00    | 0.00    | 0.00    | 0.00    | 0.00    | 0.00    | 0.00    | 0.00    |
| GH61       | 0.00    | 0.00    | 0.00    | 0.00    | 0.00    | 0.00    | 0.00    | 0.00    | 0.00    | 0.00    | 0.00    | 0.00    | 0.00    | 0.00    | 0.00    | 0.00    |
| GH80       | 0.00    | 0.00    | 0.00    | 0.00    | 0.00    | 0.00    | 0.00    | 0.00    | 0.00    | 0.00    | 0.00    | 0.00    | 0.00    | 0.00    | 0.00    | 0.00    |
| GH98       | 0.02    | 0.00    | 0.00    | 0.00    | 0.06    | 0.01    | 0.04    | 0.00    | 0.04    | 0.00    | 0.00    | 0.00    | 0.00    | 0.00    | 0.08    | 0.05    |
| GH6        | 0.00    | 0.00    | 0.02    | 0.00    | 0.00    | 0.00    | 0.00    | 0.00    | 0.00    | 0.00    | 0.00    | 0.00    | 0.00    | 0.00    | 0.00    | 0.00    |
| GT1        | 0.11    | 0.08    | 0.07    | 0.00    | 0.09    | 0.08    | 0.08    | 0.11    | 0.17    | 0.18    | 0.05    | 0.00    | 0.49    | 0.06    | 0.16    | 0.05    |
| GH28       | 2.11    | 2.05    | 1.07    | 2.74    | 2.23    | 1.09    | 2.23    | 1.52    | 1.30    | 0.53    | 0.66    | 0.28    | 0.65    | 0.58    | 1.39    | 2.23    |
| GT42       | 0.00    | 0.00    | 0.00    | 0.00    | 0.00    | 0.00    | 0.00    | 0.00    | 0.00    | 0.00    | 0.00    | 0.00    | 0.00    | 0.00    | 0.00    | 0.00    |
| GH128      | 0.00    | 0.04    | 0.00    | 0.03    | 0.00    | 0.00    | 0.00    | 0.00    | 0.00    | 0.00    | 0.00    | 0.00    | 0.00    | 0.00    | 0.00    | 0.00    |
| CE12       | 0.36    | 0.38    | 0.08    | 0.35    | 0.22    | 0.16    | 0.39    | 0.39    | 0.17    | 0.02    | 0.01    | 0.00    | 0.00    | 0.02    | 0.10    | 0.19    |
| CE16       | 0.00    | 0.00    | 0.00    | 0.00    | 0.00    | 0.00    | 0.00    | 0.00    | 0.00    | 0.00    | 0.00    | 0.00    | 0.00    | 0.00    | 0.00    | 0.00    |
| GT89       | 0.00    | 0.00    | 0.00    | 0.00    | 0.00    | 0.00    | 0.00    | 0.00    | 0.00    | 0.00    | 0.00    | 0.00    | 0.00    | 0.00    | 0.00    | 0.00    |
| GT11       | 0.11    | 0.02    | 0.04    | 0.06    | 0.13    | 0.03    | 0.04    | 0.05    | 0.00    | 0.00    | 0.04    | 0.00    | 0.00    | 0.00    | 0.16    | 0.02    |
| GT77       | 0.16    | 0.06    | 0.10    | 0.06    | 0.02    | 0.00    | 0.00    | 0.32    | 0.17    | 0.54    | 0.12    | 0.03    | 6.01    | 0.27    | 0.08    | 0.02    |
| GT55       | 0.00    | 0.00    | 0.00    | 0.00    | 0.00    | 0.00    | 0.00    | 0.00    | 0.00    | 0.00    | 0.00    | 0.00    | 0.00    | 0.00    | 0.00    | 0.00    |
| GT18       | 0.00    | 0.00    | 0.00    | 0.00    | 0.00    | 0.00    | 0.00    | 0.00    | 0.00    | 0.00    | 0.00    | 0.00    | 0.00    | 0.00    | 0.00    | 0.00    |
| GH87       | 0.02    | 0.00    | 0.04    | 0.06    | 0.00    | 0.02    | 0.00    | 0.00    | 0.00    | 0.16    | 0.02    | 0.00    | 0.00    | 0.00    | 0.00    | 0.03    |
| PL5        | 0.00    | 0.00    | 0.00    | 0.00    | 0.00    | 0.00    | 0.00    | 0.00    | 0.00    | 0.00    | 0.00    | 0.00    | 0.00    | 0.00    | 0.00    | 0.00    |
| GH22       | 0.00    | 0.00    | 0.00    | 0.00    | 0.00    | 0.00    | 0.00    | 0.02    | 0.00    | 0.00    | 0.00    | 0.00    | 0.00    | 0.00    | 0.00    | 0.00    |
| CE2        | 0.09    | 0.25    | 0.09    | 0.32    | 0.13    | 0.10    | 0.31    | 0.05    | 0.21    | 0.25    | 0.24    | 0.00    | 0.16    | 0.00    | 0.05    | 0.29    |
| GH120      | 0.02    | 0.15    | 0.01    | 0.03    | 0.09    | 0.09    | 0.20    | 0.07    | 0.21    | 0.44    | 0.12    | 0.22    | 0.00    | 0.00    | 0.05    | 0.03    |
| GH73       | 1.58    | 1.31    | 0.67    | 1.05    | 1.60    | 0.84    | 1.88    | 1.32    | 1.21    | 2.19    | 1.02    | 0.73    | 0.33    | 0.71    | 0.52    | 0.99    |
| GT17       | 0.02    | 0.00    | 0.01    | 0.00    | 0.00    | 0.01    | 0.00    | 0.00    | 0.00    | 0.00    | 0.00    | 0.00    | 0.00    | 0.00    | 0.00    | 0.00    |
| GH124      | 0.00    | 0.00    | 0.00    | 0.00    | 0.00    | 0.00    | 0.00    | 0.00    | 0.00    | 0.00    | 0.00    | 0.00    | 0.00    | 0.00    | 0.00    | 0.00    |
| GH54       | 0.00    | 0.00    | 0.00    | 0.00    | 0.00    | 0.00    | 0.00    | 0.00    | 0.00    | 0.00    | 0.00    | 0.00    | 0.00    | 0.00    | 0.00    | 0.00    |
| GH100      | 0.00    | 0.00    | 0.00    | 0.00    | 0.00    | 0.00    | 0.00    | 0.00    | 0.00    | 0.00    | 0.00    | 0.00    | 0.00    | 0.00    | 0.00    | 0.00    |
| GH113      | 0.07    | 0.06    | 0.03    | 0.03    | 0.00    | 0.02    | 0.00    | 0.04    | 0.04    | 0.00    | 0.00    | 0.00    | 0.00    | 0.00    | 0.08    | 0.00    |
| GT5        | 0.62    | 0.84    | 0.94    | 0.90    | 1.04    | 0.86    | 0.71    | 0.75    | 1.51    | 0.50    | 0.36    | 0.51    | 0.33    | 0.13    | 1.10    | 0.74    |
| GH94       | 0.67    | 1.16    | 0.51    | 1.75    | 1.34    | 0.61    | 1.06    | 0.86    | 1.26    | 0.06    | 0.07    | 0.03    | 0.00    | 0.00    | 0.10    | 0.31    |
| GT66       | 0.02    | 0.00    | 0.05    | 0.00    | 0.00    | 0.04    | 0.00    | 0.00    | 0.00    | 0.00    | 0.00    | 0.00    | 0.00    | 0.00    | 0.00    | 0.02    |
| GT94       | 0.00    | 0.00    | 0.00    | 0.00    | 0.00    | 0.00    | 0.00    | 0.00    | 0.00    | 0.00    | 0.00    | 0.00    | 0.00    | 0.00    | 0.00    | 0.00    |
| GH58       | 0.00    | 0.00    | 0.00    | 0.00    | 0.00    | 0.01    | 0.00    | 0.04    | 0.00    | 0.00    | 0.00    | 0.00    | 0.00    | 0.02    | 0.00    | 0.00    |
| GH1        | 0.69    | 1.01    | 0.85    | 1.46    | 1.36    | 0.70    | 1.10    | 1.72    | 1.26    | 4.89    | 2.38    | 0.60    | 0.98    | 1.78    | 1.13    | 2.56    |
| PL22       | 0.07    | 0.00    | 0.00    | 0.00    | 0.00    | 0.00    | 0.00    | 0.02    | 0.00    | 0.01    | 0.00    | 0.00    | 0.00    | 0.00    | 0.00    | 0.00    |
| GT9        | 0.49    | 0.44    | 0.08    | 0.29    | 0.41    | 0.19    | 0.55    | 0.77    | 0.29    | 0.18    | 0.06    | 0.06    | 0.33    | 0.10    | 0.16    | 0.64    |

## Normalized\_abundance\_2

| CAZY_group | VE-AD-2 | VE-AD-3 | VE-AD-4 | VE-AD-5 | VE-AD-6 | VE-CH-1 | VE-CH-2 | VE-CH-3 | VE-CH-4 | VE-CH-5 | VE-CH-6 | VE-IN-1 | VE-IN-2 | VE-IN-3 | VE-IN-4 | VE-IN-5 |
|------------|---------|---------|---------|---------|---------|---------|---------|---------|---------|---------|---------|---------|---------|---------|---------|---------|
| GT76       | 0.00    | 0.00    | 0.01    | 0.00    | 0.00    | 0.00    | 0.00    | 0.00    | 0.00    | 0.00    | 0.00    | 0.00    | 0.03    | 0.00    | 0.00    | 0.00    |
| GT32       | 0.13    | 0.11    | 0.16    | 0.26    | 0.11    | 0.11    | 0.16    | 0.13    | 0.21    | 0.31    | 0.63    | 0.13    | 0.00    | 0.00    | 0.18    | 0.12    |
| GT47       | 0.13    | 0.11    | 0.20    | 0.26    | 0.35    | 0.17    | 0.27    | 0.30    | 0.13    | 0.44    | 0.35    | 0.51    | 0.00    | 0.56    | 0.39    | 0.43    |
| GH84       | 0.44    | 0.34    | 0.08    | 0.09    | 0.56    | 0.15    | 0.35    | 0.32    | 0.04    | 2.57    | 2.86    | 0.79    | 0.00    | 0.31    | 0.45    | 1.23    |
| GH83       | 0.00    | 0.00    | 0.00    | 0.00    | 0.00    | 0.00    | 0.00    | 0.00    | 0.00    | 0.00    | 0.00    | 0.00    | 0.00    | 0.00    | 0.00    | 0.00    |
| GT59       | 0.00    | 0.00    | 0.00    | 0.00    | 0.00    | 0.00    | 0.00    | 0.00    | 0.00    | 0.00    | 0.00    | 0.00    | 0.00    | 0.00    | 0.00    | 0.00    |
| GH34       | 0.00    | 0.00    | 0.00    | 0.00    | 0.00    | 0.00    | 0.00    | 0.00    | 0.00    | 0.00    | 0.00    | 0.00    | 0.00    | 0.00    | 0.00    | 0.00    |
| GT14       | 0.11    | 0.02    | 0.02    | 0.00    | 0.17    | 0.00    | 0.00    | 0.04    | 0.04    | 0.31    | 0.06    | 0.00    | 0.00    | 0.00    | 0.16    | 0.03    |
| GH47       | 0.00    | 0.00    | 0.00    | 0.00    | 0.00    | 0.00    | 0.00    | 0.00    | 0.00    | 0.01    | 0.02    | 0.00    | 0.00    | 0.06    | 0.00    | 0.02    |
| GH97       | 2.71    | 2.20    | 1.80    | 2.74    | 2.69    | 1.80    | 2.43    | 1.72    | 1.84    | 0.00    | 0.01    | 0.03    | 0.00    | 0.00    | 2.44    | 2.30    |
| GH50       | 0.00    | 0.00    | 0.05    | 0.00    | 0.00    | 0.03    | 0.00    | 0.00    | 0.04    | 0.00    | 0.00    | 0.00    | 0.16    | 0.00    | 0.03    | 0.55    |
| GT26       | 0.38    | 0.63    | 0.20    | 0.38    | 0.41    | 0.23    | 0.51    | 0.45    | 0.46    | 0.51    | 0.52    | 0.19    | 0.00    | 0.35    | 0.55    | 0.47    |
| GH18       | 0.36    | 0.57    | 0.61    | 0.29    | 0.61    | 0.59    | 0.71    | 0.70    | 0.96    | 0.73    | 1.34    | 0.89    | 0.49    | 0.31    | 0.92    | 1.00    |
| GH37       | 0.09    | 0.02    | 0.03    | 0.12    | 0.00    | 0.04    | 0.00    | 0.48    | 0.00    | 0.14    | 0.02    | 0.00    | 0.98    | 0.12    | 0.03    | 0.02    |
| PL13       | 0.00    | 0.02    | 0.00    | 0.00    | 0.00    | 0.00    | 0.00    | 0.00    | 0.00    | 0.00    | 0.00    | 0.00    | 0.00    | 0.00    | 0.03    | 0.10    |
| GH27       | 0.75    | 0.61    | 0.39    | 0.58    | 0.48    | 0.36    | 0.55    | 0.23    | 0.46    | 0.43    | 0.01    | 0.00    | 0.00    | 0.00    | 0.94    | 0.38    |
| GT54       | 0.00    | 0.00    | 0.00    | 0.00    | 0.00    | 0.00    | 0.00    | 0.00    | 0.00    | 0.00    | 0.00    | 0.00    | 0.00    | 0.00    | 0.00    | 0.00    |
| GT91       | 0.00    | 0.00    | 0.00    | 0.00    | 0.00    | 0.00    | 0.00    | 0.00    | 0.00    | 0.00    | 0.00    | 0.00    | 0.00    | 0.00    | 0.00    | 0.00    |
| GT72       | 0.18    | 0.00    | 0.00    | 0.00    | 0.00    | 0.00    | 0.00    | 0.00    | 0.00    | 0.00    | 0.00    | 0.00    | 0.00    | 0.00    | 0.00    | 0.00    |
| GH67       | 0.33    | 0.21    | 0.04    | 0.41    | 0.32    | 0.08    | 0.16    | 0.14    | 0.29    | 0.00    | 0.01    | 0.00    | 0.00    | 0.02    | 0.18    | 0.40    |
| GH12       | 0.00    | 0.00    | 0.00    | 0.00    | 0.04    | 0.00    | 0.00    | 0.02    | 0.00    | 0.00    | 0.00    | 0.00    | 0.00    | 0.02    | 0.03    | 0.00    |
| GH91       | 0.00    | 0.11    | 0.01    | 0.00    | 0.00    | 0.02    | 0.00    | 0.04    | 0.00    | 0.00    | 0.00    | 0.00    | 0.00    | 0.00    | 0.00    | 0.00    |
| GT69       | 0.00    | 0.00    | 0.00    | 0.00    | 0.00    | 0.00    | 0.00    | 0.00    | 0.00    | 0.00    | 0.00    | 0.00    | 0.00    | 0.00    | 0.00    | 0.00    |
| GH106      | 0.36    | 0.63    | 0.96    | 0.47    | 0.56    | 0.82    | 0.63    | 0.30    | 0.29    | 0.00    | 0.00    | 0.00    | 0.16    | 0.00    | 0.21    | 0.55    |
| GT62       | 0.00    | 0.00    | 0.00    | 0.00    | 0.00    | 0.00    | 0.00    | 0.00    | 0.00    | 0.00    | 0.00    | 0.00    | 0.00    | 0.00    | 0.00    | 0.00    |
| GH17       | 0.00    | 0.00    | 0.00    | 0.00    | 0.00    | 0.00    | 0.00    | 0.00    | 0.00    | 0.00    | 0.00    | 0.00    | 0.16    | 0.00    | 0.00    | 0.00    |
| GH88       | 0.27    | 0.21    | 0.28    | 0.32    | 0.19    | 0.16    | 0.27    | 0.18    | 0.21    | 0.06    | 0.05    | 0.16    | 0.00    | 0.00    | 0.89    | 0.90    |
| CE5        | 0.00    | 0.00    | 0.00    | 0.00    | 0.00    | 0.00    | 0.00    | 0.00    | 0.00    | 0.00    | 0.00    | 0.00    | 0.00    | 0.00    | 0.00    | 0.00    |
| GT8        | 0.16    | 0.13    | 0.17    | 0.29    | 0.24    | 0.16    | 0.39    | 0.29    | 0.33    | 1.30    | 0.95    | 0.66    | 0.98    | 0.15    | 1.36    | 0.90    |
| GT50       | 0.00    | 0.00    | 0.00    | 0.00    | 0.00    | 0.00    | 0.00    | 0.00    | 0.00    | 0.00    | 0.00    | 0.00    | 0.00    | 0.00    | 0.00    | 0.00    |
| GT20       | 0.02    | 0.00    | 0.00    | 0.00    | 0.00    | 0.00    | 0.00    | 0.14    | 0.00    | 0.06    | 0.00    | 0.06    | 0.16    | 0.00    | 0.03    | 0.19    |
| PL9        | 0.55    | 0.21    | 0.04    | 0.12    | 0.30    | 0.10    | 0.04    | 0.59    | 0.25    | 0.11    | 0.00    | 0.00    | 0.00    | 0.02    | 1.31    | 0.03    |
| GH55       | 0.02    | 0.00    | 0.02    | 0.03    | 0.00    | 0.01    | 0.04    | 0.00    | 0.00    | 0.00    | 0.00    | 0.00    | 0.00    | 0.00    | 0.03    | 0.02    |
| GH64       | 0.02    | 0.00    | 0.00    | 0.00    | 0.02    | 0.00    | 0.00    | 0.00    | 0.00    | 0.00    | 0.00    | 0.00    | 0.00    | 0.00    | 0.00    | 0.00    |
| GH127      | 1.00    | 0.95    | 0.54    | 0.61    | 1.00    | 0.62    | 0.98    | 0.73    | 0.63    | 0.65    | 0.05    | 0.22    | 0.00    | 0.08    | 1.91    | 0.48    |
| GH103      | 0.00    | 0.00    | 0.01    | 0.03    | 0.00    | 0.00    | 0.00    | 0.27    | 0.00    | 0.06    | 0.01    | 0.06    | 0.16    | 0.08    | 0.00    | 0.07    |
| GH3        | 5.61    | 6.44    | 4.36    | 6.43    | 5.70    | 4.82    | 6.50    | 4.89    | 4.56    | 4.46    | 3.81    | 3.64    | 1.14    | 3.05    | 11.68   | 7.19    |
| GT45       | 0.00    | 0.00    | 0.00    | 0.00    | 0.00    | 0.00    | 0.00    | 0.00    | 0.00    | 0.00    | 0.00    | 0.00    | 0.00    | 0.00    | 0.00    | 0.00    |
| GT74       | 0.00    | 0.00    | 0.00    | 0.00    | 0.00    | 0.00    | 0.00    | 0.00    | 0.00    | 0.00    | 0.00    | 0.00    | 0.00    | 0.00    | 0.00    | 0.00    |
| GT90       | 0.00    | 0.02    | 0.02    | 0.00    | 0.00    | 0.00    | 0.00    | 0.00    | 0.00    | 0.00    | 0.00    | 0.00    | 0.00    | 0.00    | 0.00    | 0.00    |
| GH116      | 0.00    | 0.02    | 0.01    | 0.12    | 0.02    | 0.04    | 0.04    | 0.00    | 0.00    | 0.00    | 0.00    | 0.00    | 0.00    | 0.00    | 0.00    | 0.00    |
| GH31       | 2.80    | 3.00    | 1.44    | 3.17    | 2.97    | 1.40    | 2.51    | 2.99    | 2.51    | 2.41    | 1.56    | 1.83    | 0.16    | 0.33    | 4.30    | 3.12    |
| GT12       | 0.00    | 0.00    | 0.00    | 0.00    | 0.00    | 0.00    | 0.00    | 0.00    | 0.00    | 0.00    | 0.00    | 0.00    | 0.16    | 0.00    | 0.00    | 0.00    |
| CE1        | 0.58    | 0.65    | 0.54    | 0.90    | 0.67    | 0.59    | 1.06    | 0.77    | 0.21    | 0.51    | 0.21    | 0.19    | 0.16    | 0.33    | 0.58    | 0.69    |
| GH121      | 0.00    | 0.00    | 0.00    | 0.03    | 0.00    | 0.04    | 0.04    | 0.00    | 0.29    | 0.94    | 0.02    | 0.54    | 0.00    | 0.06    | 0.05    | 0.47    |
| GH79       | 0.07    | 0.00    | 0.00    | 0.00    | 0.02    | 0.00    | 0.04    | 0.02    | 0.04    | 0.01    | 0.00    | 0.06    | 0.00    | 0.00    | 0.03    | 0.03    |
| GT73       | 0.02    | 0.00    | 0.00    | 0.00    | 0.00    | 0.00    | 0.00    | 0.02    | 0.00    | 0.00    | 0.02    | 0.00    | 0.00    | 0.00    | 0.00    | 0.00    |
| GH77       | 1.95    | 2.18    | 1.57    | 1.46    | 1.80    | 1.28    | 2.04    | 1.61    | 2.55    | 2.64    | 2.71    | 3.92    | 1.46    | 5.62    | 2.41    | 2.06    |
| PL17       | 0.00    | 0.06    | 0.00    | 0.00    | 0.02    | 0.00    | 0.00    | 0.00    | 0.00    | 0.00    | 0.00    | 0.00    | 0.00    | 0.00    | 0.00    | 0.00    |
| PL8        | 0.29    | 0.23    | 0.16    | 0.06    | 0.11    | 0.19    | 0.16    | 0.11    | 0.17    | 0.01    | 0.00    | 0.00    | 0.00    | 0.00    | 0.58    | 0.73    |

## Normalized\_abundance\_2

| CAZY_group | VE-AD-2 | VE-AD-3 | VE-AD-4 | VE-AD-5 | VE-AD-6 | VE-CH-1 | VE-CH-2 | VE-CH-3 | VE-CH-4 | VE-CH-5 | VE-CH-6 | VE-IN-1 | VE-IN-2 | VE-IN-3 | VE-IN-4 | VE-IN-5 |
|------------|---------|---------|---------|---------|---------|---------|---------|---------|---------|---------|---------|---------|---------|---------|---------|---------|
| CE9        | 0.49    | 0.65    | 0.46    | 0.61    | 0.80    | 0.48    | 0.51    | 1.04    | 0.71    | 1.58    | 1.43    | 1.55    | 0.65    | 1.50    | 1.20    | 1.59    |
| CE15       | 0.00    | 0.02    | 0.06    | 0.00    | 0.02    | 0.05    | 0.00    | 0.00    | 0.00    | 0.00    | 0.00    | 0.00    | 0.00    | 0.00    | 0.03    | 0.03    |
| GT79       | 0.00    | 0.00    | 0.00    | 0.00    | 0.00    | 0.00    | 0.00    | 0.00    | 0.00    | 0.00    | 0.00    | 0.00    | 0.00    | 0.00    | 0.00    | 0.00    |
| GT10       | 0.00    | 0.00    | 0.05    | 0.00    | 0.00    | 0.07    | 0.00    | 0.00    | 0.00    | 0.00    | 0.00    | 0.00    | 0.00    | 0.00    | 0.16    | 0.00    |
| GH119      | 0.00    | 0.00    | 0.01    | 0.00    | 0.00    | 0.00    | 0.00    | 0.00    | 0.00    | 0.00    | 0.00    | 0.00    | 0.00    | 0.00    | 0.00    | 0.00    |
| GH16       | 0.29    | 0.23    | 0.36    | 0.49    | 0.35    | 0.31    | 0.51    | 0.23    | 0.17    | 0.09    | 0.15    | 0.03    | 0.16    | 0.04    | 0.94    | 0.42    |
| GH43       | 4.90    | 6.04    | 2.06    | 5.30    | 5.35    | 2.59    | 5.29    | 3.94    | 2.64    | 7.70    | 1.47    | 2.88    | 0.16    | 1.15    | 6.34    | 5.71    |
| GH51       | 1.60    | 2.18    | 0.52    | 2.24    | 1.58    | 0.70    | 1.80    | 0.89    | 1.13    | 2.98    | 2.35    | 1.83    | 0.33    | 2.40    | 2.44    | 2.15    |
| GT35       | 2.02    | 2.66    | 1.80    | 2.27    | 2.43    | 1.55    | 2.08    | 2.27    | 2.55    | 3.03    | 2.25    | 2.62    | 1.14    | 3.66    | 2.02    | 2.30    |
| GT25       | 0.00    | 0.00    | 0.00    | 0.00    | 0.02    | 0.00    | 0.04    | 0.00    | 0.00    | 0.00    | 0.00    | 0.02    | 0.00    | 0.00    | 0.00    | 0.00    |
| GT2        | 11.87   | 12.12   | 8.19    | 10.97   | 11.76   | 7.83    | 9.79    | 11.01   | 11.42   | 15.29   | 18.84   | 16.63   | 9.10    | 21.09   | 15.09   | 15.06   |
| GT51       | 3.04    | 2.81    | 1.80    | 2.68    | 2.88    | 1.86    | 2.98    | 3.17    | 2.34    | 5.24    | 4.58    | 3.51    | 2.93    | 6.08    | 3.14    | 3.84    |
| GH107      | 0.00    | 0.00    | 0.00    | 0.00    | 0.00    | 0.00    | 0.00    | 0.00    | 0.00    | 0.00    | 0.00    | 0.00    | 0.00    | 0.00    | 0.00    | 0.00    |
| GH7        | 0.00    | 0.00    | 0.00    | 0.00    | 0.00    | 0.00    | 0.00    | 0.00    | 0.00    | 0.00    | 0.00    | 0.00    | 0.00    | 0.00    | 0.00    | 0.00    |
| GT7        | 0.00    | 0.00    | 0.00    | 0.00    | 0.00    | 0.00    | 0.00    | 0.00    | 0.00    | 0.00    | 0.00    | 0.00    | 0.00    | 0.00    | 0.00    | 0.00    |
| GT36       | 0.00    | 0.00    | 0.00    | 0.00    | 0.00    | 0.00    | 0.00    | 0.00    | 0.00    | 0.00    | 0.00    | 0.00    | 0.00    | 0.00    | 0.00    | 0.00    |
| PL7        | 0.00    | 0.00    | 0.02    | 0.00    | 0.00    | 0.01    | 0.00    | 0.00    | 0.00    | 0.00    | 0.00    | 0.00    | 0.00    | 0.00    | 0.00    | 0.00    |
| GH110      | 0.02    | 0.25    | 0.21    | 0.00    | 0.22    | 0.08    | 0.04    | 0.16    | 0.00    | 0.74    | 0.98    | 0.16    | 0.00    | 0.15    | 1.07    | 0.43    |
| GT21       | 0.00    | 0.00    | 0.00    | 0.00    | 0.00    | 0.00    | 0.00    | 0.00    | 0.00    | 0.00    | 0.00    | 0.00    | 0.00    | 0.00    | 0.00    | 0.00    |
| GH62       | 0.00    | 0.00    | 0.00    | 0.00    | 0.00    | 0.00    | 0.00    | 0.00    | 0.04    | 0.00    | 0.00    | 0.00    | 0.00    | 0.00    | 0.00    | 0.00    |
| GH125      | 0.27    | 0.38    | 0.27    | 0.20    | 0.43    | 0.25    | 0.43    | 0.23    | 0.17    | 0.26    | 0.58    | 0.89    | 0.00    | 1.36    | 0.86    | 0.57    |
| GH117      | 0.07    | 0.02    | 0.04    | 0.00    | 0.04    | 0.04    | 0.12    | 0.02    | 0.08    | 0.00    | 0.00    | 0.00    | 0.00    | 0.00    | 0.45    | 0.17    |
| GH68       | 0.00    | 0.00    | 0.00    | 0.00    | 0.00    | 0.00    | 0.00    | 0.00    | 0.00    | 0.14    | 0.25    | 0.00    | 0.00    | 0.04    | 0.00    | 0.14    |
| GH85       | 0.67    | 0.36    | 0.03    | 0.06    | 0.24    | 0.12    | 0.63    | 0.29    | 0.25    | 0.13    | 0.09    | 0.89    | 0.65    | 0.25    | 0.10    | 0.28    |
| GH92       | 2.20    | 2.01    | 3.10    | 1.80    | 1.82    | 2.57    | 2.70    | 1.95    | 1.59    | 0.08    | 0.34    | 0.32    | 0.49    | 0.65    | 5.42    | 3.79    |
| GH40       | 0.00    | 0.00    | 0.00    | 0.00    | 0.00    | 0.00    | 0.00    | 0.00    | 0.00    | 0.00    | 0.00    | 0.00    | 0.00    | 0.00    | 0.00    | 0.00    |
| GT49       | 0.00    | 0.00    | 0.01    | 0.00    | 0.00    | 0.00    | 0.00    | 0.00    | 0.00    | 0.00    | 0.00    | 0.00    | 0.00    | 0.00    | 0.00    | 0.00    |
| GH112      | 0.24    | 0.42    | 0.07    | 0.55    | 0.52    | 0.21    | 0.39    | 0.38    | 0.71    | 1.65    | 2.23    | 2.06    | 0.49    | 2.68    | 0.63    | 1.06    |
| GT67       | 0.00    | 0.00    | 0.00    | 0.00    | 0.00    | 0.00    | 0.00    | 0.00    | 0.00    | 0.00    | 0.00    | 0.00    | 0.00    | 0.00    | 0.00    | 0.00    |
| CE8        | 0.67    | 0.59    | 0.07    | 0.81    | 0.61    | 0.21    | 0.78    | 0.77    | 0.50    | 0.17    | 0.14    | 0.06    | 0.33    | 0.06    | 0.31    | 0.35    |
| GT86       | 0.00    | 0.00    | 0.00    | 0.00    | 0.00    | 0.00    | 0.00    | 0.00    | 0.00    | 0.00    | 0.00    | 0.00    | 0.00    | 0.00    | 0.00    | 0.00    |
| GH101      | 0.02    | 0.00    | 0.00    | 0.06    | 0.00    | 0.04    | 0.04    | 0.13    | 0.00    | 1.67    | 1.84    | 0.60    | 0.00    | 0.29    | 0.08    | 0.68    |
| GH81       | 0.00    | 0.02    | 0.01    | 0.00    | 0.00    | 0.00    | 0.00    | 0.00    | 0.00    | 0.00    | 0.00    | 0.00    | 0.00    | 0.00    | 0.03    | 0.03    |
| GT93       | 0.00    | 0.00    | 0.00    | 0.00    | 0.00    | 0.00    | 0.00    | 0.00    | 0.00    | 0.00    | 0.00    | 0.00    | 0.00    | 0.00    | 0.00    | 0.00    |
| GT63       | 0.00    | 0.00    | 0.00    | 0.00    | 0.00    | 0.00    | 0.00    | 0.00    | 0.00    | 0.00    | 0.00    | 0.00    | 0.00    | 0.00    | 0.00    | 0.00    |
| CE11       | 1.04    | 0.76    | 0.30    | 0.55    | 0.50    | 0.38    | 0.59    | 0.79    | 0.46    | 0.27    | 0.15    | 0.00    | 0.16    | 0.04    | 0.39    | 0.40    |
| GT19       | 0.42    | 0.44    | 0.33    | 0.44    | 0.28    | 0.21    | 0.35    | 0.45    | 0.13    | 0.02    | 0.02    | 0.00    | 0.33    | 0.10    | 0.52    | 0.45    |
| GT33       | 0.00    | 0.00    | 0.00    | 0.00    | 0.00    | 0.00    | 0.00    | 0.00    | 0.00    | 0.00    | 0.00    | 0.00    | 0.00    | 0.00    | 0.00    | 0.00    |
| GH21       | 0.00    | 0.00    | 0.00    | 0.00    | 0.00    | 0.00    | 0.00    | 0.00    | 0.00    | 0.00    | 0.00    | 0.00    | 0.00    | 0.00    | 0.00    | 0.00    |
| GT68       | 0.00    | 0.00    | 0.00    | 0.00    | 0.00    | 0.00    | 0.00    | 0.00    | 0.00    | 0.00    | 0.00    | 0.00    | 0.00    | 0.00    | 0.00    | 0.00    |
| GH89       | 0.40    | 0.32    | 0.59    | 0.23    | 0.35    | 0.38    | 0.59    | 0.25    | 0.17    | 1.33    | 1.42    | 0.41    | 0.00    | 0.21    | 0.94    | 1.45    |
| GT82       | 0.00    | 0.00    | 0.00    | 0.00    | 0.00    | 0.00    | 0.00    | 0.00    | 0.00    | 0.00    | 0.00    | 0.00    | 0.00    | 0.00    | 0.00    | 0.00    |
| GH30       | 0.31    | 0.21    | 0.24    | 0.26    | 0.06    | 0.26    | 0.24    | 0.13    | 0.13    | 0.85    | 0.42    | 0.73    | 0.00    | 0.10    | 0.47    | 0.90    |
| GH20       | 2.42    | 2.20    | 1.93    | 1.43    | 2.58    | 2.00    | 1.88    | 1.83    | 1.38    | 4.41    | 7.60    | 4.58    | 1.95    | 8.01    | 5.24    | 5.09    |
| GH52       | 0.00    | 0.00    | 0.00    | 0.00    | 0.00    | 0.00    | 0.00    | 0.00    | 0.00    | 0.00    | 0.00    | 0.00    | 0.00    | 0.00    | 0.00    | 0.00    |
| GT84       | 0.02    | 0.04    | 0.09    | 0.00    | 0.02    | 0.03    | 0.00    | 0.00    | 0.04    | 0.00    | 0.00    | 0.00    | 0.00    | 0.00    | 0.00    | 0.00    |
| GT15       | 0.00    | 0.00    | 0.00    | 0.00    | 0.00    | 0.00    | 0.00    | 0.00    | 0.00    | 0.00    | 0.00    | 0.00    | 0.00    | 0.00    | 0.00    | 0.00    |
| GH93       | 0.00    | 0.00    | 0.01    | 0.00    | 0.00    | 0.01    | 0.00    | 0.02    | 0.00    | 0.01    | 0.00    | 0.00    | 0.00    | 0.00    | 0.00    | 0.00    |
| PL16       | 0.00    | 0.00    | 0.00    | 0.00    | 0.00    | 0.00    | 0.00    | 0.00    | 0.00    | 0.00    | 0.00    | 0.00    | 0.00    | 0.00    | 0.00    | 0.00    |
| GH26       | 0.38    | 0.46    | 0.14    | 0.64    | 0.45    | 0.27    | 0.55    | 0.32    | 0.63    | 0.01    | 0.02    | 0.00    | 0.65    | 0.00    | 0.60    | 0.12    |

## Normalized\_abundance\_2

| CAZY_group | VE-AD-2 | VE-AD-3 | VE-AD-4 | VE-AD-5 | VE-AD-6 | VE-CH-1 | VE-CH-2 | VE-CH-3 | VE-CH-4 | VE-CH-5 | VE-CH-6 | VE-IN-1 | VE-IN-2 | VE-IN-3 | VE-IN-4 | VE-IN-5 |
|------------|---------|---------|---------|---------|---------|---------|---------|---------|---------|---------|---------|---------|---------|---------|---------|---------|
| GT75       | 0.00    | 0.00    | 0.00    | 0.00    | 0.00    | 0.00    | 0.00    | 0.00    | 0.00    | 0.00    | 0.00    | 0.00    | 0.00    | 0.00    | 0.00    | 0.00    |
| GH53       | 0.44    | 0.36    | 0.20    | 0.55    | 0.65    | 0.13    | 0.51    | 0.43    | 0.42    | 0.56    | 0.52    | 1.30    | 0.33    | 0.92    | 0.26    | 0.55    |
| GT88       | 0.00    | 0.00    | 0.00    | 0.00    | 0.00    | 0.00    | 0.00    | 0.00    | 0.00    | 0.00    | 0.00    | 0.00    | 0.00    | 0.00    | 0.00    | 0.00    |
| GT24       | 0.00    | 0.00    | 0.00    | 0.00    | 0.00    | 0.00    | 0.00    | 0.00    | 0.00    | 0.00    | 0.00    | 0.00    | 0.00    | 0.00    | 0.00    | 0.00    |
| GT81       | 0.00    | 0.00    | 0.00    | 0.00    | 0.00    | 0.00    | 0.00    | 0.00    | 0.00    | 0.00    | 0.00    | 0.00    | 0.00    | 0.00    | 0.00    | 0.00    |
| GH4        | 0.31    | 0.21    | 0.24    | 0.32    | 0.24    | 0.20    | 0.20    | 0.79    | 0.29    | 0.56    | 0.75    | 0.22    | 1.14    | 0.17    | 0.18    | 0.48    |
| GT78       | 0.00    | 0.00    | 0.00    | 0.00    | 0.00    | 0.00    | 0.00    | 0.00    | 0.00    | 0.00    | 0.00    | 0.00    | 0.00    | 0.00    | 0.00    | 0.00    |
| GH8        | 0.16    | 0.21    | 0.01    | 0.23    | 0.06    | 0.07    | 0.04    | 0.29    | 0.04    | 0.32    | 0.17    | 0.03    | 0.49    | 0.12    | 0.05    | 0.19    |
| GH70       | 0.00    | 0.17    | 0.00    | 0.06    | 0.00    | 0.00    | 0.00    | 0.04    | 0.00    | 1.05    | 0.11    | 0.00    | 0.16    | 0.36    | 0.00    | 0.55    |
| GH122      | 0.00    | 0.00    | 0.00    | 0.00    | 0.00    | 0.00    | 0.00    | 0.00    | 0.00    | 0.00    | 0.00    | 0.00    | 0.00    | 0.00    | 0.00    | 0.00    |
| GH74       | 0.00    | 0.04    | 0.04    | 0.06    | 0.06    | 0.04    | 0.08    | 0.05    | 0.04    | 0.00    | 0.00    | 0.00    | 0.00    | 0.00    | 0.00    | 0.00    |
| GT41       | 0.09    | 0.00    | 0.03    | 0.06    | 0.02    | 0.00    | 0.00    | 0.02    | 0.04    | 0.00    | 0.04    | 0.00    | 0.16    | 0.00    | 0.00    | 0.03    |
| PL1        | 0.64    | 0.63    | 0.24    | 0.61    | 0.52    | 0.46    | 0.35    | 0.38    | 0.54    | 0.00    | 0.00    | 0.00    | 0.00    | 0.00    | 0.18    | 0.71    |
| GH15       | 0.00    | 0.00    | 0.00    | 0.00    | 0.00    | 0.00    | 0.00    | 0.00    | 0.00    | 0.00    | 0.00    | 0.00    | 0.00    | 0.00    | 0.08    | 0.12    |
| GH32       | 1.49    | 1.92    | 0.56    | 2.12    | 1.56    | 0.84    | 1.65    | 1.27    | 1.34    | 2.34    | 1.57    | 1.83    | 1.79    | 3.09    | 2.04    | 1.39    |
| GH44       | 0.00    | 0.02    | 0.03    | 0.06    | 0.02    | 0.00    | 0.04    | 0.00    | 0.04    | 0.00    | 0.00    | 0.00    | 0.00    | 0.00    | 0.00    | 0.00    |
| GT6        | 0.02    | 0.00    | 0.00    | 0.00    | 0.04    | 0.00    | 0.00    | 0.00    | 0.00    | 0.00    | 0.00    | 0.00    | 0.00    | 0.00    | 0.00    | 0.00    |
| GH13       | 6.79    | 9.17    | 6.00    | 9.26    | 9.68    | 6.08    | 8.15    | 7.95    | 8.33    | 17.24   | 14.52   | 12.14   | 6.01    | 19.67   | 8.98    | 9.18    |
| GT80       | 0.07    | 0.00    | 0.03    | 0.03    | 0.04    | 0.02    | 0.00    | 0.16    | 0.00    | 0.05    | 0.00    | 0.00    | 0.33    | 0.02    | 0.00    | 0.02    |
| GH71       | 0.00    | 0.00    | 0.00    | 0.00    | 0.00    | 0.00    | 0.00    | 0.00    | 0.00    | 0.00    | 0.00    | 0.00    | 0.00    | 0.00    | 0.00    | 0.00    |
| GH63       | 0.42    | 0.27    | 0.11    | 0.15    | 0.22    | 0.17    | 0.12    | 0.47    | 0.13    | 0.13    | 0.00    | 0.00    | 0.33    | 0.12    | 0.45    | 0.12    |
| PL21       | 0.00    | 0.00    | 0.06    | 0.00    | 0.00    | 0.04    | 0.00    | 0.00    | 0.00    | 0.00    | 0.00    | 0.00    | 0.00    | 0.00    | 0.03    | 0.00    |
| GH65       | 0.04    | 0.11    | 0.31    | 0.20    | 0.15    | 0.31    | 0.47    | 0.27    | 0.17    | 1.26    | 0.71    | 0.06    | 0.33    | 0.12    | 0.55    | 0.47    |
| CE4        | 0.73    | 0.87    | 0.99    | 0.99    | 0.91    | 1.03    | 1.18    | 0.68    | 1.34    | 0.83    | 0.60    | 0.51    | 0.49    | 0.12    | 0.73    | 0.88    |
| CE14       | 0.00    | 0.02    | 0.02    | 0.03    | 0.00    | 0.03    | 0.00    | 0.09    | 0.00    | 0.01    | 0.04    | 0.00    | 0.00    | 0.00    | 0.05    | 0.03    |
| GH115      | 0.69    | 0.97    | 0.16    | 0.84    | 0.65    | 0.24    | 1.14    | 0.79    | 0.46    | 0.00    | 0.02    | 0.00    | 0.00    | 0.00    | 0.89    | 1.39    |
| GH104      | 0.00    | 0.00    | 0.01    | 0.00    | 0.04    | 0.00    | 0.00    | 0.11    | 0.04    | 0.00    | 0.01    | 0.00    | 0.33    | 0.00    | 0.00    | 0.00    |
| GH111      | 0.00    | 0.00    | 0.01    | 0.00    | 0.00    | 0.00    | 0.00    | 0.00    | 0.00    | 0.00    | 0.00    | 0.03    | 0.00    | 0.00    | 0.00    | 0.00    |
| GH95       | 2.09    | 2.22    | 0.82    | 1.34    | 2.23    | 1.17    | 1.96    | 1.34    | 1.21    | 2.36    | 2.76    | 1.52    | 0.81    | 3.07    | 3.09    | 2.44    |
| GT70       | 0.00    | 0.00    | 0.00    | 0.00    | 0.00    | 0.00    | 0.00    | 0.00    | 0.00    | 0.00    | 0.00    | 0.00    | 0.00    | 0.00    | 0.00    | 0.00    |
| CE10       | 0.49    | 0.32    | 0.32    | 0.20    | 0.39    | 0.24    | 0.39    | 0.41    | 0.25    | 0.40    | 0.40    | 0.35    | 0.65    | 0.61    | 0.71    | 0.42    |
| GH10       | 0.36    | 0.46    | 0.07    | 0.64    | 0.76    | 0.10    | 0.39    | 0.29    | 0.29    | 0.00    | 0.00    | 0.03    | 0.00    | 0.00    | 0.21    | 0.35    |
| GH130      | 0.40    | 0.49    | 0.32    | 0.64    | 0.41    | 0.34    | 0.78    | 0.25    | 0.50    | 0.00    | 0.00    | 0.00    | 0.00    | 0.00    | 0.45    | 0.80    |
| PL20       | 0.00    | 0.00    | 0.00    | 0.00    | 0.00    | 0.00    | 0.00    | 0.00    | 0.00    | 0.00    | 0.00    | 0.00    | 0.00    | 0.00    | 0.00    | 0.00    |
| GH69       | 0.00    | 0.00    | 0.00    | 0.00    | 0.00    | 0.00    | 0.00    | 0.00    | 0.00    | 0.00    | 0.00    | 0.00    | 0.00    | 0.00    | 0.00    | 0.00    |
| PL2        | 0.00    | 0.00    | 0.00    | 0.00    | 0.00    | 0.00    | 0.00    | 0.02    | 0.00    | 0.00    | 0.00    | 0.00    | 0.00    | 0.00    | 0.00    | 0.00    |
| GH49       | 0.00    | 0.00    | 0.00    | 0.00    | 0.00    | 0.00    | 0.00    | 0.00    | 0.00    | 0.00    | 0.00    | 0.00    | 0.00    | 0.00    | 0.00    | 0.00    |
| GH25       | 0.98    | 1.54    | 0.61    | 1.40    | 2.43    | 0.91    | 1.18    | 1.13    | 0.88    | 4.32    | 3.41    | 4.62    | 0.33    | 0.92    | 1.18    | 1.94    |
| GH59       | 0.02    | 0.00    | 0.01    | 0.03    | 0.00    | 0.01    | 0.00    | 0.02    | 0.00    | 0.00    | 0.00    | 0.00    | 0.00    | 0.00    | 0.00    | 0.00    |
| GH35       | 0.71    | 0.72    | 0.62    | 0.99    | 0.45    | 0.60    | 0.67    | 0.68    | 0.59    | 0.31    | 0.47    | 0.38    | 0.33    | 0.40    | 2.41    | 0.88    |
| GT39       | 0.00    | 0.06    | 0.04    | 0.09    | 0.00    | 0.02    | 0.00    | 0.02    | 0.00    | 0.00    | 0.01    | 0.00    | 0.00    | 0.02    | 0.00    | 0.00    |
| GT57       | 0.00    | 0.00    | 0.00    | 0.00    | 0.00    | 0.00    | 0.00    | 0.00    | 0.00    | 0.00    | 0.00    | 0.00    | 0.00    | 0.00    | 0.00    | 0.00    |
| GH129      | 0.00    | 0.00    | 0.00    | 0.03    | 0.04    | 0.01    | 0.00    | 0.00    | 0.00    | 0.85    | 1.59    | 1.04    | 0.33    | 1.53    | 0.24    | 0.64    |
| GT22       | 0.00    | 0.00    | 0.00    | 0.00    | 0.00    | 0.00    | 0.00    | 0.00    | 0.00    | 0.00    | 0.00    | 0.00    | 0.00    | 0.00    | 0.00    | 0.00    |
| PL12       | 0.02    | 0.04    | 0.05    | 0.00    | 0.00    | 0.03    | 0.00    | 0.04    | 0.04    | 0.00    | 0.00    | 0.00    | 0.00    | 0.00    | 0.13    | 0.31    |
| PL18       | 0.00    | 0.00    | 0.00    | 0.00    | 0.00    | 0.00    | 0.00    | 0.00    | 0.00    | 0.00    | 0.00    | 0.00    | 0.00    | 0.00    | 0.00    | 0.00    |
| GT92       | 0.00    | 0.00    | 0.00    | 0.00    | 0.00    | 0.00    | 0.00    | 0.00    | 0.00    | 0.00    | 0.00    | 0.00    | 0.00    | 0.00    | 0.00    | 0.00    |
| GT44       | 0.00    | 0.02    | 0.00    | 0.00    | 0.00    | 0.00    | 0.00    | 0.00    | 0.00    | 0.00    | 0.00    | 0.00    | 0.00    | 0.00    | 0.00    | 0.00    |
| GT29       | 0.00    | 0.00    | 0.00    | 0.00    | 0.00    | 0.00    | 0.00    | 0.00    | 0.00    | 0.00    | 0.00    | 0.00    | 0.00    | 0.00    | 0.00    | 0.00    |
| GT13       | 0.00    | 0.00    | 0.00    | 0.00    | 0.00    | 0.00    | 0.00    | 0.00    | 0.00    | 0.00    | 0.00    | 0.00    | 0.00    | 0.00    | 0.00    | 0.00    |

Normalized\_abundance\_2

| CAZY_group | VE-AD-2 | VE-AD-3 | VE-AD-4 | VE-AD-5 | VE-AD-6 | VE-CH-1 | VE-CH-2 | VE-CH-3 | VE-CH-4 | VE-CH-5 | VE-CH-6 | VE-IN-1 | VE-IN-2 | VE-IN-3 | VE-IN-4 | VE-IN-5 |
|------------|---------|---------|---------|---------|---------|---------|---------|---------|---------|---------|---------|---------|---------|---------|---------|---------|
| GT52       | 0.00    | 0.00    | 0.00    | 0.00    | 0.00    | 0.00    | 0.00    | 0.00    | 0.00    | 0.00    | 0.00    | 0.00    | 0.00    | 0.00    | 0.00    | 0.00    |
| GT64       | 0.00    | 0.00    | 0.00    | 0.00    | 0.00    | 0.00    | 0.00    | 0.00    | 0.00    | 0.00    | 0.00    | 0.00    | 0.00    | 0.00    | 0.00    | 0.00    |
| GT85       | 0.00    | 0.00    | 0.00    | 0.00    | 0.00    | 0.00    | 0.00    | 0.00    | 0.00    | 0.04    | 0.00    | 0.00    | 0.00    | 0.00    | 0.00    | 0.00    |
| GT16       | 0.00    | 0.00    | 0.00    | 0.00    | 0.00    | 0.00    | 0.00    | 0.00    | 0.00    | 0.00    | 0.00    | 0.00    | 0.00    | 0.00    | 0.00    | 0.00    |
| GH56       | 0.00    | 0.00    | 0.00    | 0.00    | 0.00    | 0.00    | 0.00    | 0.00    | 0.00    | 0.00    | 0.00    | 0.00    | 0.00    | 0.16    | 0.00    | 0.00    |
| GT60       | 0.00    | 0.00    | 0.00    | 0.00    | 0.00    | 0.00    | 0.00    | 0.00    | 0.00    | 0.00    | 0.00    | 0.00    | 0.00    | 0.00    | 0.00    | 0.00    |
| GH41       | 0.00    | 0.00    | 0.00    | 0.00    | 0.00    | 0.00    | 0.00    | 0.00    | 0.00    | 0.00    | 0.00    | 0.00    | 0.00    | 0.00    | 0.00    | 0.00    |
| CE7        | 0.33    | 0.25    | 0.09    | 0.49    | 0.22    | 0.11    | 0.35    | 0.13    | 0.13    | 0.13    | 0.03    | 0.00    | 0.00    | 0.00    | 0.02    | 0.21    |
| GH39       | 0.04    | 0.06    | 0.05    | 0.06    | 0.04    | 0.02    | 0.00    | 0.00    | 0.00    | 0.00    | 0.17    | 0.00    | 0.00    | 0.16    | 0.00    | 0.13    |
| GT30       | 0.69    | 0.46    | 0.33    | 0.70    | 0.78    | 0.28    | 0.51    | 0.64    | 0.25    | 0.65    | 0.81    | 0.44    | 0.16    | 1.00    | 1.00    | 1.14    |
| PL15       | 0.07    | 0.06    | 0.00    | 0.00    | 0.04    | 0.00    | 0.00    | 0.04    | 0.00    | 0.00    | 0.00    | 0.00    | 0.00    | 0.00    | 0.10    | 0.42    |
| GH102      | 0.13    | 0.08    | 0.02    | 0.17    | 0.02    | 0.04    | 0.08    | 0.25    | 0.04    | 0.16    | 0.09    | 0.00    | 0.16    | 0.04    | 0.10    | 0.12    |



## Normalized\_abundance\_2

| CAZY_group | VE-IN-6 | VE-IN-7 | VE-IN-8 |
|------------|---------|---------|---------|
| GH29       | 4.07    | 3.06    | 3.19    |
| PL4        | 0.00    | 0.00    | 0.00    |
| GH23       | 3.39    | 2.77    | 3.19    |
| CE6        | 0.08    | 0.00    | 0.00    |
| GH72       | 0.37    | 0.44    | 0.70    |
| GH114      | 0.00    | 0.00    | 0.00    |
| GH78       | 2.12    | 0.89    | 0.10    |
| PL19       | 0.00    | 0.00    | 0.00    |
| GT27       | 0.00    | 0.00    | 0.00    |
| GH5        | 1.06    | 1.73    | 1.74    |
| GT40       | 0.00    | 0.00    | 0.00    |
| CE13       | 0.00    | 0.00    | 0.00    |
| GT37       | 0.00    | 0.00    | 0.00    |
| GH33       | 4.78    | 5.44    | 3.97    |
| GT65       | 0.00    | 0.00    | 0.00    |
| GH86       | 0.02    | 0.00    | 0.00    |
| GH123      | 0.31    | 0.00    | 0.00    |
| GH96       | 0.00    | 0.00    | 0.00    |
| GH14       | 0.00    | 0.00    | 0.00    |
| CE3        | 0.00    | 0.00    | 0.00    |
| PL10       | 0.12    | 0.00    | 0.00    |
| GT48       | 0.00    | 0.00    | 0.00    |
| PL6        | 0.00    | 0.00    | 0.00    |
| GT83       | 0.94    | 0.07    | 0.49    |
| GH126      | 0.00    | 0.00    | 0.02    |
| GH9        | 0.02    | 0.02    | 0.00    |
| GH75       | 0.00    | 0.00    | 0.00    |
| GT71       | 0.00    | 0.00    | 0.00    |
| GH46       | 0.00    | 0.00    | 0.00    |
| GT61       | 0.00    | 0.00    | 0.00    |
| GT3        | 0.27    | 0.00    | 0.00    |
| PL3        | 0.00    | 0.00    | 0.00    |
| GH108      | 0.02    | 0.00    | 0.00    |
| GT56       | 0.00    | 0.07    | 0.14    |
| PL11       | 0.25    | 0.00    | 0.00    |
| GH45       | 0.00    | 0.00    | 0.00    |
| GT34       | 0.00    | 0.03    | 0.02    |
| PL14       | 0.00    | 0.00    | 0.00    |
| GH19       | 0.00    | 0.00    | 0.08    |
| GH118      | 0.00    | 0.00    | 0.00    |
| GH82       | 0.00    | 0.00    | 0.00    |
| GH76       | 0.67    | 0.00    | 0.02    |
| GT4        | 6.58    | 7.47    | 8.35    |
| GT87       | 0.00    | 0.02    | 0.00    |
| GH24       | 0.25    | 0.07    | 0.27    |
| GH90       | 0.00    | 0.00    | 0.00    |
| GH57       | 0.16    | 0.00    | 0.00    |
| GH36       | 2.96    | 4.11    | 2.82    |
| GT46       | 0.00    | 0.00    | 0.00    |
| GH66       | 0.12    | 0.02    | 0.31    |

## Normalized\_abundance\_2

| CAZY_group | VE-IN-6 | VE-IN-7 | VE-IN-8 |
|------------|---------|---------|---------|
| GH48       | 0.00    | 0.00    | 0.00    |
| GT53       | 0.00    | 0.00    | 0.00    |
| GH60       | 0.00    | 0.00    | 0.00    |
| GT31       | 0.00    | 0.00    | 0.00    |
| GH105      | 0.86    | 0.08    | 0.08    |
| GT23       | 0.00    | 0.00    | 0.00    |
| GH11       | 0.00    | 0.00    | 0.00    |
| GT38       | 0.00    | 0.00    | 0.00    |
| GT43       | 0.00    | 0.00    | 0.00    |
| GH99       | 0.02    | 0.00    | 0.00    |
| GH38       | 3.25    | 2.84    | 4.03    |
| GH109      | 0.45    | 0.02    | 0.04    |
| GH2        | 13.53   | 10.63   | 5.42    |
| GT28       | 1.41    | 1.80    | 1.74    |
| GH42       | 2.23    | 5.94    | 4.25    |
| GT58       | 0.00    | 0.00    | 0.00    |
| GH61       | 0.00    | 0.00    | 0.00    |
| GH80       | 0.00    | 0.00    | 0.00    |
| GH98       | 0.00    | 0.00    | 0.00    |
| GH6        | 0.00    | 0.00    | 0.00    |
| GT1        | 0.14    | 0.13    | 0.02    |
| GH28       | 1.47    | 0.92    | 0.65    |
| GT42       | 0.00    | 0.00    | 0.00    |
| GH128      | 0.00    | 0.00    | 0.00    |
| CE12       | 0.25    | 0.02    | 0.00    |
| CE16       | 0.00    | 0.00    | 0.00    |
| GT89       | 0.00    | 0.00    | 0.00    |
| GT11       | 0.04    | 0.00    | 0.00    |
| GT77       | 0.10    | 0.10    | 0.88    |
| GT55       | 0.00    | 0.00    | 0.00    |
| GT18       | 0.00    | 0.00    | 0.00    |
| GH87       | 0.00    | 0.03    | 0.18    |
| PL5        | 0.00    | 0.00    | 0.00    |
| GH22       | 0.00    | 0.00    | 0.00    |
| CE2        | 0.10    | 0.30    | 0.06    |
| GH120      | 0.10    | 0.05    | 0.16    |
| GH73       | 1.16    | 0.91    | 1.17    |
| GT17       | 0.00    | 0.00    | 0.00    |
| GH124      | 0.00    | 0.00    | 0.00    |
| GH54       | 0.00    | 0.00    | 0.00    |
| GH100      | 0.00    | 0.00    | 0.00    |
| GH113      | 0.00    | 0.00    | 0.00    |
| GT5        | 0.65    | 0.25    | 0.31    |
| GH94       | 0.10    | 0.45    | 0.14    |
| GT66       | 0.00    | 0.00    | 0.00    |
| GT94       | 0.00    | 0.00    | 0.00    |
| GH58       | 0.00    | 0.00    | 0.00    |
| GH1        | 0.96    | 3.78    | 2.23    |
| PL22       | 0.00    | 0.00    | 0.06    |
| GT9        | 0.45    | 0.27    | 1.02    |

Normalized\_abundance\_2

| CAZY_group | VE-IN-6 | VE-IN-7 | VE-IN-8 |
|------------|---------|---------|---------|
| GT76       | 0.00    | 0.00    | 0.00    |
| GT32       | 0.20    | 0.39    | 0.80    |
| GT47       | 0.49    | 0.49    | 0.55    |
| GH84       | 2.10    | 1.63    | 1.08    |
| GH83       | 0.00    | 0.00    | 0.00    |
| GT59       | 0.00    | 0.00    | 0.00    |
| GH34       | 0.00    | 0.00    | 0.00    |
| GT14       | 0.06    | 0.32    | 0.57    |
| GH47       | 0.02    | 0.05    | 0.02    |
| GH97       | 2.02    | 0.00    | 0.00    |
| GH50       | 0.04    | 0.00    | 0.00    |
| GT26       | 0.29    | 0.54    | 0.68    |
| GH18       | 0.96    | 0.77    | 0.49    |
| GH37       | 0.04    | 0.02    | 0.33    |
| PL13       | 0.02    | 0.00    | 0.00    |
| GH27       | 0.31    | 0.02    | 0.00    |
| GT54       | 0.00    | 0.00    | 0.00    |
| GT91       | 0.00    | 0.00    | 0.00    |
| GT72       | 0.00    | 0.00    | 0.00    |
| GH67       | 0.08    | 0.00    | 0.00    |
| GH12       | 0.02    | 0.00    | 0.00    |
| GH91       | 0.00    | 0.02    | 0.02    |
| GT69       | 0.00    | 0.00    | 0.00    |
| GH106      | 0.78    | 0.00    | 0.00    |
| GT62       | 0.00    | 0.00    | 0.00    |
| GH17       | 0.00    | 0.00    | 0.00    |
| GH88       | 0.33    | 0.02    | 0.02    |
| CE5        | 0.00    | 0.00    | 0.00    |
| GT8        | 0.37    | 0.30    | 3.76    |
| GT50       | 0.00    | 0.00    | 0.00    |
| GT20       | 0.14    | 0.02    | 0.00    |
| PL9        | 0.12    | 0.07    | 0.14    |
| GH55       | 0.02    | 0.05    | 0.00    |
| GH64       | 0.00    | 0.00    | 0.00    |
| GH127      | 1.41    | 0.44    | 0.10    |
| GH103      | 0.06    | 0.07    | 0.12    |
| GH3        | 6.70    | 7.66    | 3.74    |
| GT45       | 0.00    | 0.00    | 0.00    |
| GT74       | 0.00    | 0.00    | 0.00    |
| GT90       | 0.00    | 0.00    | 0.00    |
| GH116      | 0.00    | 0.00    | 0.00    |
| GH31       | 2.98    | 1.13    | 1.84    |
| GT12       | 0.00    | 0.00    | 0.00    |
| CE1        | 0.59    | 0.22    | 0.76    |
| GH121      | 0.00    | 0.20    | 0.14    |
| GH79       | 0.00    | 0.00    | 0.00    |
| GT73       | 0.00    | 0.00    | 0.06    |
| GH77       | 3.21    | 4.35    | 3.23    |
| PL17       | 0.00    | 0.00    | 0.00    |
| PL8        | 0.74    | 0.07    | 0.04    |

## Normalized\_abundance\_2

| CAZY_group | VE-IN-6 | VE-IN-7 | VE-IN-8 |
|------------|---------|---------|---------|
| CE9        | 1.53    | 1.95    | 0.98    |
| CE15       | 0.00    | 0.00    | 0.00    |
| GT79       | 0.00    | 0.00    | 0.00    |
| GT10       | 0.02    | 0.00    | 0.00    |
| GH119      | 0.00    | 0.00    | 0.00    |
| GH16       | 0.41    | 0.05    | 0.10    |
| GH43       | 5.09    | 2.22    | 1.92    |
| GH51       | 2.33    | 2.03    | 1.90    |
| GT35       | 2.31    | 4.00    | 2.88    |
| GT25       | 0.00    | 0.00    | 0.02    |
| GT2        | 17.47   | 21.75   | 19.29   |
| GT51       | 4.45    | 5.29    | 5.11    |
| GH107      | 0.00    | 0.00    | 0.00    |
| GH7        | 0.00    | 0.00    | 0.00    |
| GT7        | 0.00    | 0.00    | 0.00    |
| GT36       | 0.00    | 0.00    | 0.00    |
| PL7        | 0.00    | 0.02    | 0.00    |
| GH110      | 0.96    | 0.67    | 0.39    |
| GT21       | 0.00    | 0.00    | 0.00    |
| GH62       | 0.00    | 0.00    | 0.00    |
| GH125      | 0.55    | 0.79    | 0.78    |
| GH117      | 0.22    | 0.00    | 0.00    |
| GH68       | 0.00    | 0.00    | 0.14    |
| GH85       | 0.59    | 0.12    | 0.14    |
| GH92       | 5.27    | 0.45    | 0.41    |
| GH40       | 0.00    | 0.00    | 0.00    |
| GT49       | 0.00    | 0.00    | 0.00    |
| GH112      | 1.57    | 2.50    | 1.96    |
| GT67       | 0.00    | 0.00    | 0.00    |
| CE8        | 0.16    | 0.05    | 0.16    |
| GT86       | 0.00    | 0.00    | 0.00    |
| GH101      | 1.14    | 1.09    | 0.86    |
| GH81       | 0.00    | 0.00    | 0.00    |
| GT93       | 0.00    | 0.00    | 0.00    |
| GT63       | 0.00    | 0.00    | 0.00    |
| CE11       | 0.27    | 0.15    | 0.18    |
| GT19       | 0.31    | 0.13    | 0.25    |
| GT33       | 0.00    | 0.00    | 0.00    |
| GH21       | 0.00    | 0.00    | 0.00    |
| GT68       | 0.00    | 0.00    | 0.00    |
| GH89       | 1.53    | 0.76    | 0.76    |
| GT82       | 0.00    | 0.00    | 0.00    |
| GH30       | 0.61    | 0.62    | 0.18    |
| GH20       | 8.17    | 6.90    | 6.01    |
| GH52       | 0.00    | 0.00    | 0.00    |
| GT84       | 0.00    | 0.00    | 0.00    |
| GT15       | 0.00    | 0.00    | 0.00    |
| GH93       | 0.00    | 0.00    | 0.00    |
| PL16       | 0.00    | 0.00    | 0.00    |
| GH26       | 0.20    | 0.00    | 0.00    |

Normalized\_abundance\_2

| CAZY_group | VE-IN-6 | VE-IN-7 | VE-IN-8 |
|------------|---------|---------|---------|
| GT75       | 0.00    | 0.00    | 0.00    |
| GH53       | 0.33    | 0.67    | 0.78    |
| GT88       | 0.00    | 0.00    | 0.00    |
| GT24       | 0.00    | 0.00    | 0.00    |
| GT81       | 0.00    | 0.00    | 0.00    |
| GH4        | 0.22    | 0.57    | 0.80    |
| GT78       | 0.00    | 0.00    | 0.00    |
| GH8        | 0.06    | 0.08    | 0.20    |
| GH70       | 0.02    | 0.24    | 1.15    |
| GH122      | 0.00    | 0.00    | 0.00    |
| GH74       | 0.00    | 0.00    | 0.00    |
| GT41       | 0.00    | 0.00    | 0.02    |
| PL1        | 0.57    | 0.00    | 0.00    |
| GH15       | 0.16    | 0.00    | 0.00    |
| GH32       | 1.57    | 2.65    | 2.99    |
| GH44       | 0.00    | 0.00    | 0.00    |
| GT6        | 0.02    | 0.00    | 0.00    |
| GH13       | 11.32   | 23.02   | 14.36   |
| GT80       | 0.00    | 0.03    | 0.08    |
| GH71       | 0.00    | 0.00    | 0.00    |
| GH63       | 0.14    | 0.08    | 0.10    |
| PL21       | 0.00    | 0.00    | 0.00    |
| GH65       | 0.20    | 1.18    | 0.41    |
| CE4        | 0.86    | 0.42    | 0.86    |
| CE14       | 0.02    | 0.03    | 0.10    |
| GH115      | 0.94    | 0.00    | 0.02    |
| GH104      | 0.00    | 0.03    | 0.00    |
| GH111      | 0.00    | 0.00    | 0.00    |
| GH95       | 3.60    | 2.77    | 2.39    |
| GT70       | 0.00    | 0.00    | 0.00    |
| CE10       | 0.57    | 0.76    | 0.41    |
| GH10       | 0.10    | 0.00    | 0.02    |
| GH130      | 0.59    | 0.00    | 0.00    |
| PL20       | 0.00    | 0.00    | 0.00    |
| GH69       | 0.00    | 0.00    | 0.00    |
| PL2        | 0.00    | 0.00    | 0.00    |
| GH49       | 0.00    | 0.00    | 0.00    |
| GH25       | 2.23    | 2.40    | 2.39    |
| GH59       | 0.00    | 0.00    | 0.00    |
| GH35       | 0.98    | 0.39    | 0.45    |
| GT39       | 0.04    | 0.02    | 0.00    |
| GT57       | 0.00    | 0.00    | 0.00    |
| GH129      | 0.92    | 1.70    | 1.19    |
| GT22       | 0.00    | 0.00    | 0.00    |
| PL12       | 0.16    | 0.02    | 0.00    |
| PL18       | 0.00    | 0.00    | 0.00    |
| GT92       | 0.00    | 0.00    | 0.00    |
| GT44       | 0.00    | 0.00    | 0.00    |
| GT29       | 0.00    | 0.00    | 0.00    |
| GT13       | 0.00    | 0.00    | 0.00    |

Normalized\_abundance\_2

| CAZY_group | VE-IN-6 | VE-IN-7 | VE-IN-8 |
|------------|---------|---------|---------|
| GT52       | 0.00    | 0.00    | 0.00    |
| GT64       | 0.00    | 0.00    | 0.00    |
| GT85       | 0.00    | 0.00    | 0.00    |
| GT16       | 0.00    | 0.00    | 0.00    |
| GH56       | 0.00    | 0.00    | 0.00    |
| GT60       | 0.00    | 0.00    | 0.00    |
| GH41       | 0.00    | 0.00    | 0.00    |
| CE7        | 0.20    | 0.03    | 0.00    |
| GH39       | 0.00    | 0.05    | 0.06    |
| GT30       | 0.94    | 0.81    | 0.61    |
| PL15       | 0.18    | 0.00    | 0.00    |
| GH102      | 0.06    | 0.08    | 0.12    |







| CAZY_group | CN-AD-1 | CN-AD-2 | CN-AD-3 | CN-AD-4 | CN-AD-5 | CN-AD-6 | CN-AD-7 | CN-AD-8 | CN-AD-9 | CN-AD-10 | CN-AD-11 | CN-AD-12 | CN-AD-13 | CN-AD-14 | CN-AD-15 | CN-AD-16 | CN-AD-17 | CN-AD-18 | CN-AD-19 | CN-AD-20 | CN-AD-21 |
|------------|---------|---------|---------|---------|---------|---------|---------|---------|---------|----------|----------|----------|----------|----------|----------|----------|----------|----------|----------|----------|----------|
| GH34       | 0.00    | 0.00    | 0.00    | 0.00    | 0.00    | 0.00    | 0.00    | 0.00    | 0.00    | 0.00     | 0.00     | 0.00     | 0.00     | 0.00     | 0.00     | 0.00     | 0.00     | 0.00     | 0.00     | 0.00     | 0.00     |
| GT14       | 0.03    | 0.02    | 0.00    | 0.00    | 0.01    | 0.02    | 0.02    | 0.02    | 0.00    | 0.02     | 0.07     | 0.00     | 0.00     | 0.00     | 0.05     | 0.04     | 0.02     | 0.05     | 0.07     | 0.06     | 0.02     |
| GH47       | 0.00    | 0.00    | 0.00    | 0.00    | 0.00    | 0.00    | 0.00    | 0.00    | 0.00    | 0.00     | 0.02     | 0.00     | 0.00     | 0.01     | 0.01     | 0.00     | 0.00     | 0.00     | 0.00     | 0.00     | 0.00     |
| GH97       | 0.69    | 0.72    | 0.81    | 0.90    | 0.58    | 0.64    | 0.67    | 0.58    | 0.52    | 0.43     | 0.02     | 0.70     | 0.12     | 0.70     | 0.99     | 1.24     | 0.68     | 0.92     | 1.66     | 1.48     | 0.44     |
| GH50       | 0.00    | 0.09    | 0.00    | 0.05    | 0.00    | 0.00    | 0.07    | 0.15    | 0.00    | 0.00     | 0.00     | 0.05     | 0.00     | 0.02     | 0.04     | 0.00     | 0.09     | 0.04     | 0.07     | 0.06     | 0.05     |
| GT26       | 0.23    | 0.18    | 0.26    | 0.21    | 0.19    | 0.16    | 0.11    | 0.15    | 0.07    | 0.18     | 0.16     | 0.14     | 0.10     | 0.08     | 0.19     | 0.17     | 0.11     | 0.18     | 0.21     | 0.17     | 0.17     |
| GH18       | 0.43    | 0.54    | 0.37    | 0.48    | 0.48    | 0.53    | 0.57    | 0.64    | 0.39    | 0.28     | 0.25     | 0.56     | 0.31     | 0.28     | 0.56     | 0.33     | 0.42     | 0.53     | 0.53     | 0.66     | 0.42     |
| GH37       | 0.00    | 0.02    | 0.00    | 0.00    | 0.00    | 0.07    | 0.02    | 0.04    | 0.05    | 0.03     | 0.09     | 0.00     | 0.00     | 0.02     | 0.00     | 0.00     | 0.00     | 0.04     | 0.00     | 0.00     | 0.00     |
| PL13       | 0.03    | 0.09    | 0.00    | 0.02    | 0.00    | 0.02    | 0.02    | 0.06    | 0.00    | 0.00     | 0.00     | 0.00     | 0.00     | 0.02     | 0.08     | 0.02     | 0.02     | 0.02     | 0.05     | 0.06     | 0.03     |
| GH27       | 0.15    | 0.18    | 0.14    | 0.19    | 0.13    | 0.13    | 0.09    | 0.21    | 0.11    | 0.16     | 0.00     | 0.17     | 0.10     | 0.16     | 0.22     | 0.22     | 0.11     | 0.19     | 0.25     | 0.33     | 0.12     |
| GT54       | 0.00    | 0.00    | 0.00    | 0.00    | 0.00    | 0.00    | 0.00    | 0.00    | 0.00    | 0.00     | 0.00     | 0.00     | 0.00     | 0.00     | 0.00     | 0.00     | 0.00     | 0.00     | 0.00     | 0.00     | 0.00     |
| GT91       | 0.00    | 0.00    | 0.00    | 0.00    | 0.00    | 0.00    | 0.00    | 0.00    | 0.00    | 0.00     | 0.00     | 0.00     | 0.00     | 0.00     | 0.00     | 0.00     | 0.00     | 0.00     | 0.00     | 0.00     | 0.00     |
| GT72       | 0.00    | 0.00    | 0.00    | 0.00    | 0.00    | 0.00    | 0.00    | 0.00    | 0.00    | 0.00     | 0.00     | 0.00     | 0.00     | 0.00     | 0.00     | 0.00     | 0.00     | 0.00     | 0.00     | 0.00     | 0.00     |
| GH67       | 0.03    | 0.02    | 0.09    | 0.09    | 0.09    | 0.04    | 0.04    | 0.06    | 0.05    | 0.08     | 0.00     | 0.09     | 0.02     | 0.05     | 0.08     | 0.20     | 0.02     | 0.00     | 0.19     | 0.04     | 0.09     |
| GH12       | 0.00    | 0.00    | 0.00    | 0.00    | 0.00    | 0.00    | 0.00    | 0.00    | 0.00    | 0.00     | 0.00     | 0.00     | 0.00     | 0.00     | 0.00     | 0.00     | 0.00     | 0.00     | 0.00     | 0.00     | 0.00     |
| GH91       | 0.03    | 0.05    | 0.00    | 0.07    | 0.03    | 0.00    | 0.07    | 0.06    | 0.00    | 0.02     | 0.04     | 0.03     | 0.02     | 0.01     | 0.03     | 0.00     | 0.09     | 0.05     | 0.00     | 0.06     | 0.02     |
| GT69       | 0.00    | 0.00    | 0.00    | 0.00    | 0.00    | 0.00    | 0.00    | 0.00    | 0.00    | 0.00     | 0.00     | 0.00     | 0.00     | 0.00     | 0.00     | 0.00     | 0.00     | 0.00     | 0.00     | 0.00     | 0.00     |
| GH106      | 0.15    | 0.20    | 0.14    | 0.14    | 0.11    | 0.22    | 0.13    | 0.26    | 0.11    | 0.28     | 0.02     | 0.17     | 0.04     | 0.36     | 0.20     | 0.31     | 0.22     | 0.30     | 0.34     | 0.30     | 0.12     |
| GT62       | 0.00    | 0.00    | 0.00    | 0.00    | 0.00    | 0.00    | 0.00    | 0.00    | 0.00    | 0.00     | 0.00     | 0.00     | 0.00     | 0.00     | 0.00     | 0.00     | 0.00     | 0.00     | 0.00     | 0.00     | 0.00     |
| GH17       | 0.00    | 0.00    | 0.00    | 0.00    | 0.00    | 0.00    | 0.00    | 0.00    | 0.00    | 0.00     | 0.00     | 0.00     | 0.00     | 0.00     | 0.00     | 0.00     | 0.00     | 0.00     | 0.00     | 0.00     | 0.00     |
| GH88       | 0.23    | 0.34    | 0.16    | 0.48    | 0.19    | 0.15    | 0.24    | 0.30    | 0.16    | 0.23     | 0.07     | 0.28     | 0.13     | 0.20     | 0.55     | 0.41     | 0.42     | 0.26     | 0.53     | 0.57     | 0.24     |
| CE5        | 0.00    | 0.00    | 0.00    | 0.00    | 0.00    | 0.00    | 0.00    | 0.00    | 0.00    | 0.00     | 0.00     | 0.00     | 0.00     | 0.00     | 0.00     | 0.00     | 0.00     | 0.00     | 0.00     | 0.00     | 0.00     |
| GT8        | 0.08    | 0.05    | 0.09    | 0.09    | 0.13    | 0.09    | 0.11    | 0.06    | 0.05    | 0.03     | 0.11     | 0.00     | 0.25     | 0.07     | 0.04     | 0.09     | 0.07     | 0.05     | 0.04     | 0.09     | 0.09     |
| GT50       | 0.00    | 0.00    | 0.00    | 0.00    | 0.00    | 0.00    | 0.00    | 0.00    | 0.00    | 0.00     | 0.00     | 0.00     | 0.00     | 0.00     | 0.00     | 0.00     | 0.00     | 0.00     | 0.00     | 0.00     | 0.00     |
| GT20       | 0.10    | 0.07    | 0.05    | 0.12    | 0.09    | 0.16    | 0.04    | 0.09    | 0.05    | 0.08     | 0.04     | 0.09     | 0.02     | 0.07     | 0.05     | 0.09     | 0.11     | 0.09     | 0.12     | 0.06     | 0.05     |
| PL9        | 0.03    | 0.16    | 0.00    | 0.07    | 0.11    | 0.02    | 0.07    | 0.08    | 0.02    | 0.00     | 0.20     | 0.08     | 0.02     | 0.02     | 0.08     | 0.02     | 0.04     | 0.00     | 0.07     | 0.09     | 0.12     |
| GH55       | 0.03    | 0.00    | 0.02    | 0.05    | 0.06    | 0.02    | 0.00    | 0.00    | 0.00    | 0.02     | 0.00     | 0.03     | 0.00     | 0.02     | 0.06     | 0.04     | 0.02     | 0.04     | 0.04     | 0.06     | 0.02     |
| GH64       | 0.00    | 0.00    | 0.00    | 0.00    | 0.00    | 0.00    | 0.00    | 0.00    | 0.00    | 0.00     | 0.00     | 0.00     | 0.00     | 0.00     | 0.00     | 0.00     | 0.00     | 0.00     | 0.02     | 0.00     | 0.00     |
| GH127      | 0.20    | 0.18    | 0.40    | 0.18    | 0.27    | 0.33    | 0.17    | 0.21    | 0.23    | 0.31     | 0.11     | 0.22     | 0.12     | 0.25     | 0.19     | 0.30     | 0.22     | 0.25     | 0.43     | 0.30     | 0.21     |
| GH103      | 0.00    | 0.02    | 0.00    | 0.00    | 0.00    | 0.04    | 0.02    | 0.02    | 0.00    | 0.00     | 0.04     | 0.00     | 0.00     | 0.01     | 0.00     | 0.00     | 0.00     | 0.02     | 0.00     | 0.00     | 0.00     |
| GH3        | 2.37    | 2.28    | 1.98    | 2.53    | 1.50    | 2.16    | 1.39    | 2.09    | 1.23    | 1.61     | 1.03     | 2.08     | 1.10     | 1.69     | 2.84     | 2.33     | 2.30     | 2.55     | 3.38     | 3.13     | 1.89     |
| GT45       | 0.00    | 0.00    | 0.00    | 0.00    | 0.00    | 0.02    | 0.00    | 0.00    | 0.00    | 0.00     | 0.00     | 0.00     | 0.00     | 0.00     | 0.00     | 0.00     | 0.00     | 0.00     | 0.00     | 0.00     | 0.00     |
| GT74       | 0.00    | 0.00    | 0.00    | 0.00    | 0.00    | 0.00    | 0.00    | 0.00    | 0.00    | 0.00     | 0.00     | 0.00     | 0.00     | 0.00     | 0.00     | 0.00     | 0.00     | 0.00     | 0.00     | 0.00     | 0.00     |
| GT90       | 0.00    | 0.00    | 0.00    | 0.00    | 0.00    | 0.00    | 0.00    | 0.00    | 0.00    | 0.00     | 0.00     | 0.00     | 0.00     | 0.00     | 0.00     | 0.00     | 0.00     | 0.00     | 0.00     | 0.00     | 0.00     |
| GH116      | 0.08    | 0.05    | 0.05    | 0.05    | 0.06    | 0.15    | 0.02    | 0.02    | 0.00    | 0.05     | 0.00     | 0.02     | 0.00     | 0.04     | 0.08     | 0.09     | 0.09     | 0.18     | 0.04     | 0.13     | 0.03     |
| GH31       | 0.94    | 0.68    | 0.81    | 1.08    | 0.88    | 0.73    | 0.63    | 0.96    | 0.66    | 0.67     | 0.45     | 0.83     | 0.54     | 0.58     | 1.03     | 0.89     | 0.77     | 0.79     | 1.43     | 1.35     | 0.70     |
| GT12       | 0.00    | 0.00    | 0.00    | 0.00    | 0.00    | 0.00    | 0.00    | 0.00    | 0.00    | 0.00     | 0.00     | 0.00     | 0.00     | 0.00     | 0.00     | 0.00     | 0.00     | 0.00     | 0.00     | 0.00     | 0.00     |
| CE1        | 0.31    | 0.41    | 0.23    | 0.37    | 0.33    | 0.40    | 0.37    | 0.21    | 0.20    | 0.18     | 0.13     | 0.20     | 0.27     | 0.15     | 0.42     | 0.39     | 0.35     | 0.35     | 0.51     | 0.42     | 0.33     |
| GH121      | 0.00    | 0.00    | 0.00    | 0.00    | 0.00    | 0.00    | 0.00    | 0.00    | 0.02    | 0.00     | 0.00     | 0.11     | 0.00     | 0.01     | 0.00     | 0.00     | 0.00     | 0.04     | 0.00     | 0.00     | 0.00     |
| GH79       | 0.00    | 0.00    | 0.00    | 0.00    | 0.00    | 0.00    | 0.00    | 0.00    | 0.00    | 0.00     | 0.00     | 0.00     | 0.04     | 0.02     | 0.00     | 0.00     | 0.00     | 0.00     | 0.00     | 0.00     | 0.03     |
| GT73       | 0.00    | 0.00    | 0.00    | 0.00    | 0.00    | 0.00    | 0.00    | 0.00    | 0.00    | 0.02     | 0.00     | 0.00     | 0.00     | 0.00     | 0.00     | 0.00     | 0.00     | 0.00     | 0.00     | 0.00     | 0.00     |
| GH77       | 0.20    | 0.54    | 0.56    | 0.48    | 0.66    | 0.44    | 0.24    | 0.24    | 0.36    | 0.39     | 0.27     | 0.59     | 0.40     | 0.34     | 0.60     | 0.39     | 0.26     | 0.42     | 0.50     | 0.42     | 0.63     |
| PL17       | 0.00    | 0.02    | 0.02    | 0.00    | 0.00    | 0.00    | 0.00    | 0.00    | 0.00    | 0.03     | 0.00     | 0.00     | 0.00     | 0.01     | 0.01     | 0.02     | 0.00     | 0.00     | 0.02     | 0.00     | 0.03     |
| PL8        | 0.20    | 0.14    | 0.16    | 0.60    | 0.16    | 0.07    | 0.15    | 0.32    | 0.07    | 0.03     | 0.04     | 0.36     | 0.00     | 0.17     | 0.39     | 0.41     | 0.42     | 0.37     | 0.25     | 0.55     | 0.19     |
| CE9        | 0.26    | 0.32    | 0.23    | 0.48    | 0.24    | 0.22    | 0.35    | 0.36    | 0.39    | 0.16     | 0.29     | 0.34     | 0.29     | 0.25     | 0.36     | 0.35     | 0.33     | 0.37     | 0.25     | 0.26     | 0.37     |
| CE15       | 0.00    | 0.02    | 0.02    | 0.00    | 0.00    | 0.05    | 0.00    | 0.02    | 0.00    | 0.02     | 0.00     | 0.00     | 0.00     | 0.02     | 0.01     | 0.00     | 0.00     | 0.04     | 0.04     | 0.00     | 0.02     |
| GT79       | 0.00    | 0.00    | 0.00    | 0.00    | 0.00    | 0.00    | 0.00    | 0.00    | 0.00    | 0.00     | 0.00     | 0.00     | 0.00     | 0.00     | 0.00     | 0.00     | 0.00     | 0.00     | 0.00     | 0.00     | 0.00     |
| GT10       | 0.03    | 0.00    | 0.00    | 0.00    | 0.00    | 0.00    | 0.00    | 0.02    | 0.00    | 0.00     | 0.00     | 0.00     | 0.00     | 0.01     | 0.00     | 0.02     | 0.02     | 0.00     | 0.00     | 0.00     | 0.00     |
| GH119      | 0.00    | 0.00    | 0.00    | 0.00    | 0.00    | 0.00    | 0.00    | 0.00    | 0.00    | 0.00     | 0.00     | 0.00     | 0.00     | 0.00     | 0.00     | 0.00     | 0.00     | 0.00     | 0.00     | 0.00     | 0.00     |
| GH16       | 0.18    | 0.18    | 0.16    | 0.42    | 0.19    | 0.16    | 0.13    | 0.26    | 0.16    | 0.15     | 0.00     | 0.19     | 0.06     | 0.17     | 0.23     | 0.33     | 0.24     | 0.12     | 0.23     | 0.35     | 0.05     |
| GH43       | 1.40    | 1.20    | 1.79    | 1.98    | 1.45    | 1.64    | 1.44    | 1.60    | 1.27    | 1.54     | 0.31     | 2.09     | 0.62     | 1.12     | 2.16     | 2.69     | 1.80     | 2.04     | 3.45     | 2.86     | 1.66     |
| GH51       | 0.43    | 0.16    | 0.40    | 0.42    | 0.47    | 0.46    | 0.39    | 0.40    | 0.39    | 0.44     | 0.09     | 0.50     | 0.29     | 0.42     | 0.41     | 0.63     | 0.42     | 0.51     | 0.69     | 0.77     | 0.40     |
| GT35       | 0.59    | 0.68    | 0.74    | 0.62    | 0.94    | 0.75    | 0.54    | 0.38    | 0.48    | 0.77     | 0.67     | 0.81     | 0.65     | 0.51     | 0.62     | 0.43     | 0.39     | 0.55     | 0.67     | 0.70     | 1.01     |



| CAZY_group | CN-AD-1 | CN-AD-2 | CN-AD-3 | CN-AD-4 | CN-AD-5 | CN-AD-6 | CN-AD-7 | CN-AD-8 | CN-AD-9 | CN-AD-10 | CN-AD-11 | CN-AD-12 | CN-AD-13 | CN-AD-14 | CN-AD-15 | CN-AD-16 | CN-AD-17 | CN-AD-18 | CN-AD-19 | CN-AD-20 | CN-AD-21 |
|------------|---------|---------|---------|---------|---------|---------|---------|---------|---------|----------|----------|----------|----------|----------|----------|----------|----------|----------|----------|----------|----------|
| PL1        | 0.13    | 0.25    | 0.16    | 0.28    | 0.23    | 0.13    | 0.33    | 0.36    | 0.00    | 0.15     | 0.09     | 0.20     | 0.02     | 0.09     | 0.33     | 0.15     | 0.26     | 0.25     | 0.43     | 0.30     | 0.17     |
| GH15       | 0.03    | 0.02    | 0.02    | 0.09    | 0.01    | 0.07    | 0.04    | 0.00    | 0.02    | 0.02     | 0.00     | 0.05     | 0.00     | 0.03     | 0.00     | 0.04     | 0.02     | 0.02     | 0.09     | 0.09     | 0.02     |
| GH32       | 0.41    | 0.29    | 0.49    | 0.39    | 0.43    | 0.22    | 0.30    | 0.43    | 0.27    | 0.34     | 0.31     | 0.45     | 0.63     | 0.13     | 0.34     | 0.33     | 0.35     | 0.30     | 0.50     | 0.41     | 0.31     |
| GH44       | 0.00    | 0.00    | 0.00    | 0.00    | 0.01    | 0.00    | 0.00    | 0.00    | 0.00    | 0.03     | 0.00     | 0.00     | 0.00     | 0.00     | 0.00     | 0.00     | 0.00     | 0.00     | 0.00     | 0.00     | 0.00     |
| GT6        | 0.00    | 0.00    | 0.00    | 0.00    | 0.00    | 0.00    | 0.00    | 0.00    | 0.00    | 0.00     | 0.02     | 0.00     | 0.00     | 0.00     | 0.00     | 0.00     | 0.00     | 0.00     | 0.00     | 0.00     | 0.00     |
| GH13       | 1.51    | 2.58    | 2.72    | 1.94    | 2.88    | 2.32    | 1.26    | 1.24    | 2.13    | 1.89     | 2.80     | 2.89     | 2.36     | 1.35     | 2.70     | 2.07     | 1.75     | 2.15     | 2.02     | 2.84     | 2.92     |
| GT80       | 0.00    | 0.00    | 0.00    | 0.00    | 0.00    | 0.00    | 0.00    | 0.02    | 0.02    | 0.02     | 0.02     | 0.05     | 0.00     | 0.03     | 0.00     | 0.00     | 0.04     | 0.02     | 0.00     | 0.00     | 0.02     |
| GH71       | 0.00    | 0.00    | 0.00    | 0.00    | 0.00    | 0.00    | 0.00    | 0.00    | 0.00    | 0.00     | 0.00     | 0.00     | 0.00     | 0.00     | 0.00     | 0.00     | 0.00     | 0.00     | 0.00     | 0.00     | 0.00     |
| GH63       | 0.08    | 0.07    | 0.02    | 0.09    | 0.03    | 0.22    | 0.02    | 0.06    | 0.05    | 0.11     | 0.16     | 0.09     | 0.00     | 0.05     | 0.08     | 0.22     | 0.02     | 0.16     | 0.21     | 0.04     | 0.07     |
| PL21       | 0.00    | 0.00    | 0.00    | 0.04    | 0.00    | 0.00    | 0.00    | 0.00    | 0.00    | 0.00     | 0.00     | 0.03     | 0.00     | 0.04     | 0.03     | 0.07     | 0.04     | 0.02     | 0.02     | 0.07     | 0.10     |
| GH65       | 0.08    | 0.07    | 0.09    | 0.19    | 0.16    | 0.13    | 0.00    | 0.09    | 0.23    | 0.02     | 0.18     | 0.11     | 0.04     | 0.09     | 0.22     | 0.20     | 0.11     | 0.23     | 0.14     | 0.13     | 0.16     |
| CE4        | 0.26    | 0.29    | 0.44    | 0.42    | 0.47    | 0.53    | 0.30    | 0.32    | 0.48    | 0.46     | 0.40     | 0.39     | 0.58     | 0.34     | 0.51     | 0.41     | 0.22     | 0.46     | 0.62     | 0.46     | 0.61     |
| CE14       | 0.00    | 0.02    | 0.00    | 0.02    | 0.00    | 0.07    | 0.04    | 0.02    | 0.00    | 0.03     | 0.02     | 0.02     | 0.00     | 0.00     | 0.04     | 0.00     | 0.02     | 0.02     | 0.02     | 0.02     | 0.00     |
| GH115      | 0.15    | 0.25    | 0.19    | 0.16    | 0.11    | 0.11    | 0.22    | 0.41    | 0.14    | 0.07     | 0.00     | 0.16     | 0.06     | 0.14     | 0.24     | 0.28     | 0.15     | 0.16     | 0.53     | 0.42     | 0.24     |
| GH104      | 0.03    | 0.00    | 0.00    | 0.00    | 0.00    | 0.00    | 0.00    | 0.02    | 0.00    | 0.00     | 0.02     | 0.00     | 0.00     | 0.00     | 0.00     | 0.00     | 0.00     | 0.02     | 0.00     | 0.00     | 0.00     |
| GH111      | 0.00    | 0.00    | 0.00    | 0.00    | 0.00    | 0.00    | 0.00    | 0.00    | 0.00    | 0.00     | 0.00     | 0.00     | 0.00     | 0.00     | 0.00     | 0.00     | 0.00     | 0.00     | 0.00     | 0.00     | 0.00     |
| GH95       | 0.28    | 0.54    | 0.33    | 0.69    | 0.51    | 0.33    | 0.48    | 0.75    | 0.20    | 0.44     | 0.11     | 0.38     | 0.15     | 0.50     | 0.64     | 0.74     | 0.66     | 0.46     | 0.94     | 0.74     | 0.49     |
| GT70       | 0.00    | 0.00    | 0.00    | 0.00    | 0.00    | 0.00    | 0.00    | 0.00    | 0.00    | 0.00     | 0.00     | 0.00     | 0.00     | 0.00     | 0.00     | 0.00     | 0.00     | 0.00     | 0.00     | 0.00     | 0.00     |
| CE10       | 0.28    | 0.16    | 0.02    | 0.23    | 0.06    | 0.22    | 0.20    | 0.26    | 0.14    | 0.11     | 0.09     | 0.20     | 0.08     | 0.10     | 0.14     | 0.22     | 0.22     | 0.18     | 0.12     | 0.26     | 0.07     |
| GH10       | 0.05    | 0.05    | 0.05    | 0.04    | 0.09    | 0.07    | 0.13    | 0.04    | 0.00    | 0.03     | 0.00     | 0.05     | 0.02     | 0.06     | 0.15     | 0.19     | 0.04     | 0.11     | 0.18     | 0.15     | 0.19     |
| GH130      | 0.26    | 0.32    | 0.23    | 0.41    | 0.29    | 0.31    | 0.37    | 0.30    | 0.11    | 0.18     | 0.02     | 0.34     | 0.04     | 0.19     | 0.32     | 0.19     | 0.33     | 0.30     | 0.41     | 0.39     | 0.23     |
| PL20       | 0.00    | 0.00    | 0.00    | 0.00    | 0.00    | 0.00    | 0.00    | 0.00    | 0.00    | 0.00     | 0.00     | 0.00     | 0.00     | 0.00     | 0.00     | 0.00     | 0.00     | 0.00     | 0.00     | 0.00     | 0.00     |
| GH69       | 0.00    | 0.00    | 0.00    | 0.00    | 0.00    | 0.00    | 0.00    | 0.00    | 0.00    | 0.00     | 0.00     | 0.00     | 0.00     | 0.00     | 0.00     | 0.00     | 0.00     | 0.00     | 0.00     | 0.00     | 0.00     |
| PL2        | 0.00    | 0.00    | 0.00    | 0.00    | 0.00    | 0.00    | 0.00    | 0.00    | 0.00    | 0.00     | 0.00     | 0.00     | 0.00     | 0.00     | 0.00     | 0.00     | 0.00     | 0.00     | 0.00     | 0.00     | 0.00     |
| GH49       | 0.00    | 0.00    | 0.00    | 0.00    | 0.00    | 0.00    | 0.00    | 0.00    | 0.00    | 0.00     | 0.00     | 0.00     | 0.00     | 0.00     | 0.00     | 0.00     | 0.00     | 0.00     | 0.00     | 0.00     | 0.00     |
| GH25       | 0.13    | 0.29    | 0.47    | 0.32    | 0.51    | 0.29    | 0.28    | 0.28    | 0.39    | 0.30     | 0.20     | 0.28     | 0.29     | 0.20     | 0.36     | 0.30     | 0.28     | 0.33     | 0.44     | 0.15     | 0.35     |
| GH59       | 0.00    | 0.00    | 0.00    | 0.02    | 0.04    | 0.00    | 0.00    | 0.00    | 0.00    | 0.03     | 0.00     | 0.00     | 0.00     | 0.00     | 0.00     | 0.00     | 0.00     | 0.00     | 0.02     | 0.00     | 0.02     |
| GH35       | 0.38    | 0.34    | 0.09    | 0.58    | 0.37    | 0.26    | 0.39    | 0.51    | 0.30    | 0.21     | 0.07     | 0.20     | 0.04     | 0.38     | 0.33     | 0.44     | 0.46     | 0.33     | 0.55     | 0.48     | 0.12     |
| GT39       | 0.00    | 0.00    | 0.00    | 0.00    | 0.00    | 0.00    | 0.00    | 0.00    | 0.00    | 0.00     | 0.00     | 0.00     | 0.00     | 0.00     | 0.00     | 0.00     | 0.00     | 0.00     | 0.00     | 0.00     | 0.00     |
| GT57       | 0.00    | 0.00    | 0.00    | 0.00    | 0.00    | 0.00    | 0.00    | 0.00    | 0.00    | 0.00     | 0.00     | 0.00     | 0.00     | 0.00     | 0.00     | 0.00     | 0.00     | 0.00     | 0.00     | 0.00     | 0.00     |
| GH129      | 0.00    | 0.00    | 0.00    | 0.00    | 0.03    | 0.00    | 0.00    | 0.00    | 0.07    | 0.00     | 0.16     | 0.00     | 0.02     | 0.00     | 0.00     | 0.00     | 0.00     | 0.02     | 0.00     | 0.02     | 0.02     |
| GT22       | 0.00    | 0.00    | 0.00    | 0.00    | 0.00    | 0.00    | 0.00    | 0.00    | 0.00    | 0.00     | 0.00     | 0.00     | 0.00     | 0.00     | 0.00     | 0.00     | 0.00     | 0.00     | 0.00     | 0.00     | 0.00     |
| PL12       | 0.08    | 0.11    | 0.00    | 0.07    | 0.00    | 0.04    | 0.11    | 0.13    | 0.00    | 0.03     | 0.00     | 0.11     | 0.02     | 0.09     | 0.18     | 0.19     | 0.15     | 0.07     | 0.11     | 0.28     | 0.19     |
| PL18       | 0.00    | 0.00    | 0.00    | 0.00    | 0.00    | 0.00    | 0.00    | 0.00    | 0.00    | 0.00     | 0.00     | 0.00     | 0.00     | 0.00     | 0.00     | 0.00     | 0.00     | 0.00     | 0.00     | 0.00     | 0.00     |
| GT92       | 0.00    | 0.00    | 0.00    | 0.00    | 0.00    | 0.00    | 0.00    | 0.00    | 0.00    | 0.00     | 0.00     | 0.00     | 0.00     | 0.00     | 0.00     | 0.00     | 0.00     | 0.00     | 0.00     | 0.00     | 0.00     |
| GT44       | 0.00    | 0.00    | 0.00    | 0.00    | 0.00    | 0.00    | 0.00    | 0.00    | 0.00    | 0.00     | 0.00     | 0.00     | 0.00     | 0.00     | 0.00     | 0.00     | 0.00     | 0.00     | 0.00     | 0.00     | 0.00     |
| GT29       | 0.00    | 0.00    | 0.00    | 0.00    | 0.00    | 0.00    | 0.00    | 0.00    | 0.00    | 0.00     | 0.00     | 0.00     | 0.00     | 0.00     | 0.00     | 0.00     | 0.00     | 0.00     | 0.00     | 0.00     | 0.00     |
| GT13       | 0.00    | 0.00    | 0.00    | 0.00    | 0.00    | 0.00    | 0.00    | 0.00    | 0.00    | 0.00     | 0.00     | 0.00     | 0.00     | 0.00     | 0.00     | 0.00     | 0.00     | 0.00     | 0.00     | 0.00     | 0.00     |
| GT52       | 0.00    | 0.00    | 0.00    | 0.00    | 0.00    | 0.00    | 0.00    | 0.00    | 0.00    | 0.00     | 0.00     | 0.00     | 0.00     | 0.00     | 0.00     | 0.00     | 0.00     | 0.00     | 0.00     | 0.00     | 0.00     |
| GT64       | 0.00    | 0.00    | 0.00    | 0.00    | 0.00    | 0.00    | 0.00    | 0.00    | 0.00    | 0.00     | 0.00     | 0.00     | 0.00     | 0.00     | 0.00     | 0.00     | 0.00     | 0.00     | 0.00     | 0.00     | 0.00     |
| GT85       | 0.00    | 0.00    | 0.00    | 0.00    | 0.00    | 0.00    | 0.00    | 0.00    | 0.00    | 0.00     | 0.00     | 0.00     | 0.00     | 0.00     | 0.00     | 0.00     | 0.00     | 0.00     | 0.00     | 0.00     | 0.00     |
| GT16       | 0.00    | 0.00    | 0.00    | 0.00    | 0.00    | 0.00    | 0.00    | 0.00    | 0.00    | 0.00     | 0.00     | 0.00     | 0.00     | 0.00     | 0.00     | 0.00     | 0.00     | 0.00     | 0.00     | 0.00     | 0.00     |
| GH56       | 0.00    | 0.00    | 0.00    | 0.00    | 0.00    | 0.00    | 0.00    | 0.00    | 0.00    | 0.00     | 0.00     | 0.00     | 0.00     | 0.00     | 0.00     | 0.00     | 0.00     | 0.00     | 0.00     | 0.00     | 0.00     |
| GT60       | 0.00    | 0.00    | 0.00    | 0.00    | 0.00    | 0.00    | 0.00    | 0.00    | 0.00    | 0.00     | 0.00     | 0.00     | 0.00     | 0.00     | 0.00     | 0.00     | 0.00     | 0.00     | 0.00     | 0.00     | 0.00     |
| GH41       | 0.00    | 0.00    | 0.00    | 0.00    | 0.00    | 0.00    | 0.00    | 0.00    | 0.00    | 0.00     | 0.00     | 0.00     | 0.00     | 0.00     | 0.00     | 0.00     | 0.00     | 0.00     | 0.00     | 0.00     | 0.00     |
| CE7        | 0.08    | 0.18    | 0.19    | 0.09    | 0.04    | 0.11    | 0.09    | 0.13    | 0.05    | 0.11     | 0.07     | 0.13     | 0.04     | 0.08     | 0.14     | 0.19     | 0.11     | 0.14     | 0.23     | 0.13     | 0.07     |
| GH39       | 0.00    | 0.02    | 0.00    | 0.04    | 0.04    | 0.09    | 0.04    | 0.02    | 0.00    | 0.05     | 0.02     | 0.06     | 0.04     | 0.01     | 0.04     | 0.00     | 0.02     | 0.00     | 0.05     | 0.06     | 0.02     |
| GT30       | 0.38    | 0.27    | 0.26    | 0.34    | 0.14    | 0.31    | 0.33    | 0.30    | 0.20    | 0.25     | 0.27     | 0.25     | 0.17     | 0.23     | 0.25     | 0.33     | 0.39     | 0.40     | 0.18     | 0.30     | 0.16     |
| PL15       | 0.10    | 0.29    | 0.00    | 0.12    | 0.00    | 0.02    | 0.17    | 0.17    | 0.00    | 0.00     | 0.00     | 0.09     | 0.00     | 0.07     | 0.10     | 0.17     | 0.18     | 0.04     | 0.23     | 0.17     | 0.10     |
| GH102      | 0.03    | 0.05    | 0.02    | 0.00    | 0.00    | 0.04    | 0.00    | 0.04    | 0.07    | 0.07     | 0.04     | 0.02     | 0.00     | 0.01     | 0.00     | 0.00     | 0.00     | 0.05     | 0.00     | 0.02     | 0.00     |





| CAZY_group   | CN-AD-22 | CN-AD-23 | CN-AD-24 | CN-AD-25 | CN-AD-26 | CN-AD-27 | CN-AD-28 | CN-AD-29 | CN-AD-30 | CN-AD-31 | CN-AD-32 | CN-AD-33 | CN-AD-34 | CN-AD-35 | CN-AD-36 | CN-AD-37 | CN-AD-38 | CN-AD-39 | CN-AD-40 | CN-AD-41 | CN-AD-42 |
|--------------|----------|----------|----------|----------|----------|----------|----------|----------|----------|----------|----------|----------|----------|----------|----------|----------|----------|----------|----------|----------|----------|
| <b>GH34</b>  | 0.00     | 0.00     | 0.00     | 0.00     | 0.00     | 0.00     | 0.00     | 0.00     | 0.00     | 0.00     | 0.00     | 0.00     | 0.00     | 0.00     | 0.00     | 0.00     | 0.00     | 0.00     | 0.00     | 0.00     | 0.00     |
| <b>GT14</b>  | 0.07     | 0.05     | 0.04     | 0.06     | 0.01     | 0.00     | 0.01     | 0.02     | 0.00     | 0.01     | 0.00     | 0.05     | 0.02     | 0.04     | 0.00     | 0.00     | 0.03     | 0.07     | 0.02     | 0.01     | 0.00     |
| <b>GH47</b>  | 0.00     | 0.00     | 0.00     | 0.00     | 0.00     | 0.00     | 0.01     | 0.00     | 0.00     | 0.00     | 0.00     | 0.00     | 0.00     | 0.00     | 0.00     | 0.00     | 0.00     | 0.00     | 0.00     | 0.00     | 0.00     |
| <b>GH97</b>  | 0.34     | 0.79     | 0.97     | 0.42     | 1.09     | 0.89     | 0.91     | 0.78     | 0.42     | 0.47     | 0.70     | 1.01     | 0.38     | 0.81     | 0.00     | 0.21     | 0.48     | 0.76     | 0.89     | 0.23     | 0.44     |
| <b>GH50</b>  | 0.00     | 0.12     | 0.06     | 0.00     | 0.07     | 0.11     | 0.06     | 0.00     | 0.00     | 0.02     | 0.07     | 0.05     | 0.02     | 0.11     | 0.00     | 0.02     | 0.00     | 0.02     | 0.07     | 0.00     | 0.04     |
| <b>GT26</b>  | 0.17     | 0.23     | 0.16     | 0.13     | 0.16     | 0.14     | 0.17     | 0.15     | 0.15     | 0.21     | 0.12     | 0.15     | 0.09     | 0.16     | 0.09     | 0.15     | 0.13     | 0.15     | 0.10     | 0.11     | 0.12     |
| <b>GH18</b>  | 0.27     | 0.65     | 0.75     | 0.55     | 0.37     | 0.41     | 0.73     | 0.31     | 0.37     | 0.59     | 0.55     | 0.71     | 0.48     | 0.65     | 0.44     | 0.25     | 0.33     | 0.28     | 0.53     | 0.23     | 0.51     |
| <b>GH37</b>  | 0.05     | 0.05     | 0.04     | 0.06     | 0.00     | 0.02     | 0.00     | 0.00     | 0.00     | 0.00     | 0.03     | 0.00     | 0.01     | 0.01     | 0.13     | 0.00     | 0.07     | 0.00     | 0.00     | 0.03     | 0.04     |
| <b>PL13</b>  | 0.00     | 0.06     | 0.02     | 0.00     | 0.03     | 0.05     | 0.06     | 0.05     | 0.00     | 0.05     | 0.07     | 0.03     | 0.01     | 0.05     | 0.00     | 0.00     | 0.01     | 0.02     | 0.04     | 0.01     | 0.02     |
| <b>GH27</b>  | 0.05     | 0.15     | 0.18     | 0.08     | 0.16     | 0.15     | 0.17     | 0.15     | 0.08     | 0.15     | 0.18     | 0.24     | 0.15     | 0.16     | 0.00     | 0.13     | 0.11     | 0.28     | 0.21     | 0.09     | 0.05     |
| <b>GT54</b>  | 0.00     | 0.00     | 0.00     | 0.00     | 0.00     | 0.00     | 0.00     | 0.00     | 0.00     | 0.00     | 0.00     | 0.00     | 0.00     | 0.00     | 0.00     | 0.00     | 0.00     | 0.00     | 0.00     | 0.00     | 0.00     |
| <b>GT91</b>  | 0.00     | 0.00     | 0.00     | 0.00     | 0.00     | 0.00     | 0.00     | 0.00     | 0.00     | 0.00     | 0.00     | 0.00     | 0.00     | 0.00     | 0.00     | 0.00     | 0.00     | 0.00     | 0.00     | 0.00     | 0.00     |
| <b>GT72</b>  | 0.00     | 0.00     | 0.00     | 0.00     | 0.00     | 0.00     | 0.00     | 0.00     | 0.00     | 0.00     | 0.00     | 0.00     | 0.00     | 0.00     | 0.00     | 0.00     | 0.00     | 0.00     | 0.00     | 0.00     | 0.00     |
| <b>GH67</b>  | 0.00     | 0.05     | 0.06     | 0.00     | 0.09     | 0.09     | 0.13     | 0.08     | 0.08     | 0.07     | 0.05     | 0.05     | 0.02     | 0.04     | 0.03     | 0.02     | 0.04     | 0.09     | 0.09     | 0.04     | 0.04     |
| <b>GH12</b>  | 0.00     | 0.00     | 0.00     | 0.00     | 0.00     | 0.00     | 0.00     | 0.00     | 0.00     | 0.00     | 0.00     | 0.00     | 0.00     | 0.00     | 0.00     | 0.00     | 0.00     | 0.00     | 0.00     | 0.00     | 0.00     |
| <b>GH91</b>  | 0.00     | 0.08     | 0.04     | 0.00     | 0.04     | 0.06     | 0.01     | 0.00     | 0.02     | 0.00     | 0.04     | 0.03     | 0.00     | 0.01     | 0.00     | 0.00     | 0.01     | 0.00     | 0.02     | 0.04     | 0.04     |
| <b>GT69</b>  | 0.00     | 0.00     | 0.00     | 0.00     | 0.00     | 0.00     | 0.00     | 0.00     | 0.00     | 0.00     | 0.00     | 0.00     | 0.00     | 0.00     | 0.00     | 0.00     | 0.00     | 0.00     | 0.00     | 0.00     | 0.00     |
| <b>GH106</b> | 0.05     | 0.14     | 0.22     | 0.04     | 0.31     | 0.26     | 0.27     | 0.17     | 0.14     | 0.13     | 0.32     | 0.20     | 0.12     | 0.26     | 0.00     | 0.11     | 0.12     | 0.13     | 0.24     | 0.04     | 0.18     |
| <b>GT62</b>  | 0.00     | 0.00     | 0.00     | 0.00     | 0.00     | 0.00     | 0.00     | 0.00     | 0.00     | 0.00     | 0.00     | 0.00     | 0.00     | 0.00     | 0.00     | 0.00     | 0.00     | 0.00     | 0.00     | 0.00     | 0.00     |
| <b>GH17</b>  | 0.00     | 0.00     | 0.00     | 0.00     | 0.00     | 0.00     | 0.00     | 0.00     | 0.00     | 0.00     | 0.00     | 0.00     | 0.00     | 0.00     | 0.00     | 0.00     | 0.00     | 0.00     | 0.00     | 0.00     | 0.00     |
| <b>GH88</b>  | 0.19     | 0.48     | 0.52     | 0.21     | 0.47     | 0.24     | 0.32     | 0.26     | 0.14     | 0.28     | 0.34     | 0.24     | 0.16     | 0.40     | 0.44     | 0.11     | 0.08     | 0.35     | 0.41     | 0.11     | 0.30     |
| <b>CE5</b>   | 0.00     | 0.00     | 0.00     | 0.00     | 0.00     | 0.00     | 0.00     | 0.00     | 0.00     | 0.00     | 0.00     | 0.00     | 0.00     | 0.00     | 0.00     | 0.00     | 0.00     | 0.00     | 0.00     | 0.00     | 0.00     |
| <b>GT8</b>   | 0.17     | 0.12     | 0.10     | 0.19     | 0.05     | 0.12     | 0.07     | 0.18     | 0.20     | 0.07     | 0.08     | 0.05     | 0.02     | 0.01     | 0.03     | 0.08     | 0.05     | 0.20     | 0.10     | 0.09     | 0.09     |
| <b>GT50</b>  | 0.00     | 0.00     | 0.00     | 0.00     | 0.00     | 0.00     | 0.00     | 0.00     | 0.00     | 0.00     | 0.00     | 0.00     | 0.00     | 0.00     | 0.00     | 0.00     | 0.00     | 0.00     | 0.00     | 0.00     | 0.00     |
| <b>GT20</b>  | 0.10     | 0.09     | 0.10     | 0.11     | 0.07     | 0.11     | 0.11     | 0.08     | 0.00     | 0.04     | 0.11     | 0.07     | 0.04     | 0.05     | 0.06     | 0.02     | 0.05     | 0.07     | 0.07     | 0.08     | 0.09     |
| <b>PL9</b>   | 0.02     | 0.08     | 0.10     | 0.13     | 0.14     | 0.08     | 0.17     | 0.23     | 0.12     | 0.10     | 0.09     | 0.05     | 0.02     | 0.08     | 0.03     | 0.02     | 0.07     | 0.04     | 0.07     | 0.20     | 0.02     |
| <b>GH55</b>  | 0.02     | 0.05     | 0.02     | 0.00     | 0.01     | 0.03     | 0.00     | 0.05     | 0.02     | 0.05     | 0.00     | 0.08     | 0.02     | 0.01     | 0.00     | 0.00     | 0.08     | 0.04     | 0.01     | 0.01     | 0.00     |
| <b>GH64</b>  | 0.00     | 0.00     | 0.00     | 0.00     | 0.00     | 0.02     | 0.00     | 0.00     | 0.00     | 0.00     | 0.00     | 0.00     | 0.00     | 0.00     | 0.00     | 0.00     | 0.00     | 0.00     | 0.00     | 0.00     | 0.00     |
| <b>GH127</b> | 0.19     | 0.19     | 0.24     | 0.29     | 0.23     | 0.35     | 0.18     | 0.17     | 0.27     | 0.10     | 0.22     | 0.22     | 0.12     | 0.32     | 0.09     | 0.42     | 0.18     | 0.28     | 0.31     | 0.20     | 0.11     |
| <b>GH103</b> | 0.02     | 0.02     | 0.02     | 0.04     | 0.00     | 0.02     | 0.00     | 0.00     | 0.00     | 0.00     | 0.00     | 0.00     | 0.00     | 0.00     | 0.06     | 0.00     | 0.03     | 0.00     | 0.00     | 0.01     | 0.04     |
| <b>GH3</b>   | 1.62     | 2.65     | 2.52     | 2.25     | 2.24     | 1.97     | 2.33     | 2.02     | 2.15     | 1.91     | 1.84     | 2.04     | 1.32     | 2.17     | 0.85     | 1.75     | 2.10     | 2.02     | 2.44     | 1.45     | 1.95     |
| <b>GT45</b>  | 0.00     | 0.00     | 0.02     | 0.00     | 0.00     | 0.00     | 0.00     | 0.00     | 0.00     | 0.00     | 0.00     | 0.00     | 0.00     | 0.00     | 0.00     | 0.00     | 0.00     | 0.00     | 0.00     | 0.00     | 0.00     |
| <b>GT74</b>  | 0.00     | 0.00     | 0.00     | 0.00     | 0.00     | 0.00     | 0.00     | 0.00     | 0.00     | 0.00     | 0.00     | 0.00     | 0.00     | 0.00     | 0.00     | 0.00     | 0.00     | 0.00     | 0.00     | 0.00     | 0.00     |
| <b>GT90</b>  | 0.00     | 0.00     | 0.00     | 0.00     | 0.00     | 0.00     | 0.00     | 0.00     | 0.00     | 0.00     | 0.00     | 0.00     | 0.00     | 0.01     | 0.00     | 0.00     | 0.00     | 0.00     | 0.00     | 0.00     | 0.00     |
| <b>GH116</b> | 0.02     | 0.06     | 0.06     | 0.06     | 0.07     | 0.02     | 0.04     | 0.12     | 0.00     | 0.02     | 0.07     | 0.12     | 0.10     | 0.03     | 0.00     | 0.00     | 0.03     | 0.07     | 0.07     | 0.04     | 0.02     |
| <b>GH31</b>  | 0.46     | 1.20     | 0.95     | 0.84     | 0.81     | 0.92     | 0.98     | 0.88     | 0.86     | 0.65     | 0.86     | 1.00     | 0.55     | 0.90     | 0.63     | 0.78     | 1.00     | 0.85     | 1.03     | 0.74     | 1.00     |
| <b>GT12</b>  | 0.00     | 0.00     | 0.00     | 0.00     | 0.00     | 0.00     | 0.00     | 0.00     | 0.00     | 0.00     | 0.00     | 0.00     | 0.00     | 0.00     | 0.00     | 0.00     | 0.00     | 0.00     | 0.00     | 0.00     | 0.00     |
| <b>CE1</b>   | 0.29     | 0.34     | 0.34     | 0.29     | 0.43     | 0.33     | 0.29     | 0.28     | 0.17     | 0.21     | 0.32     | 0.32     | 0.17     | 0.26     | 0.09     | 0.15     | 0.20     | 0.35     | 0.32     | 0.21     | 0.21     |
| <b>GH121</b> | 0.00     | 0.00     | 0.00     | 0.02     | 0.00     | 0.00     | 0.00     | 0.00     | 0.02     | 0.02     | 0.01     | 0.00     | 0.00     | 0.00     | 0.00     | 0.11     | 0.00     | 0.00     | 0.00     | 0.00     | 0.00     |
| <b>GH79</b>  | 0.00     | 0.00     | 0.00     | 0.00     | 0.00     | 0.00     | 0.00     | 0.00     | 0.00     | 0.00     | 0.00     | 0.00     | 0.00     | 0.01     | 0.00     | 0.00     | 0.01     | 0.00     | 0.00     | 0.00     | 0.00     |
| <b>GT73</b>  | 0.00     | 0.00     | 0.00     | 0.00     | 0.00     | 0.00     | 0.00     | 0.00     | 0.00     | 0.00     | 0.00     | 0.00     | 0.00     | 0.00     | 0.00     | 0.00     | 0.00     | 0.00     | 0.00     | 0.00     | 0.00     |
| <b>GH77</b>  | 0.32     | 0.35     | 0.50     | 0.32     | 0.46     | 0.52     | 0.35     | 0.51     | 0.54     | 0.55     | 0.30     | 0.59     | 0.28     | 0.58     | 0.22     | 0.61     | 0.42     | 0.39     | 0.35     | 0.56     | 0.30     |
| <b>PL17</b>  | 0.00     | 0.00     | 0.02     | 0.00     | 0.01     | 0.02     | 0.01     | 0.00     | 0.02     | 0.01     | 0.00     | 0.00     | 0.00     | 0.00     | 0.00     | 0.06     | 0.01     | 0.02     | 0.00     | 0.00     | 0.00     |
| <b>PL8</b>   | 0.07     | 0.48     | 0.50     | 0.04     | 0.29     | 0.15     | 0.24     | 0.21     | 0.07     | 0.17     | 0.36     | 0.42     | 0.12     | 0.23     | 0.06     | 0.00     | 0.11     | 0.13     | 0.41     | 0.11     | 0.19     |
| <b>CE9</b>   | 0.22     | 0.45     | 0.50     | 0.50     | 0.26     | 0.39     | 0.39     | 0.38     | 0.42     | 0.28     | 0.27     | 0.34     | 0.16     | 0.36     | 0.22     | 0.25     | 0.28     | 0.22     | 0.27     | 0.25     | 0.30     |
| <b>CE15</b>  | 0.00     | 0.03     | 0.00     | 0.00     | 0.01     | 0.00     | 0.00     | 0.00     | 0.00     | 0.02     | 0.00     | 0.00     | 0.01     | 0.00     | 0.00     | 0.00     | 0.01     | 0.02     | 0.04     | 0.00     | 0.00     |
| <b>GT79</b>  | 0.00     | 0.00     | 0.00     | 0.00     | 0.00     | 0.00     | 0.00     | 0.00     | 0.00     | 0.00     | 0.00     | 0.00     | 0.00     | 0.00     | 0.00     | 0.00     | 0.00     | 0.00     | 0.00     | 0.00     | 0.00     |
| <b>GT10</b>  | 0.00     | 0.02     | 0.00     | 0.00     | 0.00     | 0.00     | 0.00     | 0.00     | 0.00     | 0.01     | 0.01     | 0.00     | 0.02     | 0.00     | 0.00     | 0.00     | 0.00     | 0.00     | 0.01     | 0.01     | 0.00     |
| <b>GH119</b> | 0.00     | 0.00     | 0.00     | 0.00     | 0.00     | 0.00     | 0.00     | 0.00     | 0.00     | 0.00     | 0.00     | 0.00     | 0.00     | 0.00     | 0.00     | 0.00     | 0.00     | 0.00     | 0.00     | 0.00     | 0.00     |
| <b>GH16</b>  | 0.19     | 0.32     | 0.18     | 0.25     | 0.25     | 0.21     | 0.10     | 0.13     | 0.05     | 0.16     | 0.18     | 0.34     | 0.16     | 0.11     | 0.00     | 0.06     | 0.09     | 0.22     | 0.29     | 0.08     | 0.14     |
| <b>GH43</b>  | 0.85     | 2.01     | 2.42     | 1.01     | 2.65     | 1.82     | 1.83     | 1.52     | 1.15     | 1.30     | 1.96     | 1.79     | 0.77     | 2.00     | 0.47     | 1.60     | 1.47     | 1.67     | 2.14     | 0.78     | 1.14     |
| <b>GH51</b>  | 0.15     | 0.39     | 0.48     | 0.46     | 0.49     | 0.38     | 0.63     | 0.40     | 0.46     | 0.25     | 0.42     | 0.46     | 0.30     | 0.59     | 0.16     | 0.42     | 0.46     | 0.35     | 0.49     | 0.30     | 0.39     |
| <b>GT35</b>  | 0.48     | 0.85     | 0.61     | 0.95     | 0.54     | 0.61     | 0.73     | 0.66     | 0.79     | 0.65     | 0.42     | 0.54     | 0.55     | 0.73     | 0.54     | 0.72     | 0.99     | 0.54     | 0.58     | 0.74     | 0.67     |

| CAZY_group | CN-AD-22 | CN-AD-23 | CN-AD-24 | CN-AD-25 | CN-AD-26 | CN-AD-27 | CN-AD-28 | CN-AD-29 | CN-AD-30 | CN-AD-31 | CN-AD-32 | CN-AD-33 | CN-AD-34 | CN-AD-35 | CN-AD-36 | CN-AD-37 | CN-AD-38 | CN-AD-39 | CN-AD-40 | CN-AD-41 | CN-AD-42 |
|------------|----------|----------|----------|----------|----------|----------|----------|----------|----------|----------|----------|----------|----------|----------|----------|----------|----------|----------|----------|----------|----------|
| GT25       | 0.00     | 0.00     | 0.02     | 0.00     | 0.00     | 0.00     | 0.00     | 0.00     | 0.00     | 0.00     | 0.01     | 0.00     | 0.00     | 0.00     | 0.00     | 0.00     | 0.00     | 0.00     | 0.00     | 0.00     | 0.00     |
| GT2        | 2.52     | 3.93     | 4.13     | 3.85     | 3.83     | 3.56     | 3.75     | 3.54     | 2.86     | 3.03     | 2.73     | 3.66     | 2.57     | 3.49     | 1.51     | 3.04     | 2.79     | 3.47     | 3.65     | 2.98     | 2.69     |
| GT51       | 0.75     | 0.96     | 0.95     | 0.90     | 0.85     | 0.74     | 0.73     | 0.86     | 0.79     | 0.56     | 0.77     | 0.79     | 0.45     | 0.69     | 0.63     | 0.59     | 0.74     | 0.67     | 0.87     | 0.59     | 0.77     |
| GH107      | 0.00     | 0.00     | 0.00     | 0.00     | 0.00     | 0.00     | 0.00     | 0.00     | 0.00     | 0.00     | 0.00     | 0.00     | 0.00     | 0.00     | 0.00     | 0.00     | 0.00     | 0.00     | 0.00     | 0.00     | 0.00     |
| GH7        | 0.00     | 0.00     | 0.00     | 0.00     | 0.00     | 0.00     | 0.00     | 0.00     | 0.00     | 0.00     | 0.00     | 0.00     | 0.00     | 0.00     | 0.00     | 0.00     | 0.00     | 0.00     | 0.00     | 0.00     | 0.00     |
| GT7        | 0.00     | 0.00     | 0.00     | 0.00     | 0.00     | 0.00     | 0.00     | 0.00     | 0.00     | 0.00     | 0.00     | 0.00     | 0.00     | 0.00     | 0.00     | 0.00     | 0.00     | 0.00     | 0.00     | 0.00     | 0.00     |
| GT36       | 0.00     | 0.00     | 0.00     | 0.00     | 0.00     | 0.00     | 0.00     | 0.00     | 0.00     | 0.00     | 0.00     | 0.00     | 0.00     | 0.00     | 0.00     | 0.00     | 0.00     | 0.00     | 0.00     | 0.00     | 0.00     |
| PL7        | 0.00     | 0.00     | 0.00     | 0.00     | 0.00     | 0.00     | 0.00     | 0.00     | 0.00     | 0.00     | 0.00     | 0.00     | 0.00     | 0.00     | 0.00     | 0.00     | 0.00     | 0.00     | 0.00     | 0.00     | 0.00     |
| GH110      | 0.05     | 0.12     | 0.18     | 0.15     | 0.13     | 0.11     | 0.08     | 0.15     | 0.07     | 0.09     | 0.13     | 0.15     | 0.12     | 0.11     | 0.00     | 0.08     | 0.07     | 0.24     | 0.13     | 0.06     | 0.05     |
| GT21       | 0.00     | 0.00     | 0.00     | 0.00     | 0.00     | 0.00     | 0.00     | 0.00     | 0.00     | 0.00     | 0.00     | 0.00     | 0.00     | 0.00     | 0.00     | 0.00     | 0.00     | 0.00     | 0.00     | 0.00     | 0.00     |
| GH62       | 0.00     | 0.00     | 0.00     | 0.00     | 0.00     | 0.00     | 0.00     | 0.00     | 0.00     | 0.00     | 0.00     | 0.00     | 0.00     | 0.00     | 0.00     | 0.00     | 0.00     | 0.00     | 0.00     | 0.00     | 0.00     |
| GH125      | 0.22     | 0.23     | 0.20     | 0.11     | 0.13     | 0.09     | 0.21     | 0.12     | 0.03     | 0.12     | 0.13     | 0.14     | 0.11     | 0.15     | 0.03     | 0.08     | 0.07     | 0.09     | 0.14     | 0.05     | 0.14     |
| GH117      | 0.00     | 0.09     | 0.18     | 0.02     | 0.09     | 0.09     | 0.11     | 0.13     | 0.00     | 0.01     | 0.07     | 0.14     | 0.07     | 0.09     | 0.00     | 0.04     | 0.03     | 0.09     | 0.14     | 0.04     | 0.04     |
| GH68       | 0.00     | 0.00     | 0.00     | 0.02     | 0.00     | 0.00     | 0.00     | 0.00     | 0.00     | 0.00     | 0.00     | 0.00     | 0.00     | 0.00     | 0.00     | 0.00     | 0.00     | 0.00     | 0.00     | 0.00     | 0.00     |
| GH85       | 0.00     | 0.08     | 0.00     | 0.04     | 0.01     | 0.00     | 0.00     | 0.02     | 0.02     | 0.00     | 0.00     | 0.00     | 0.02     | 0.00     | 0.00     | 0.06     | 0.00     | 0.00     | 0.01     | 0.01     | 0.00     |
| GH92       | 0.53     | 1.59     | 2.42     | 1.26     | 1.75     | 1.44     | 1.68     | 1.06     | 0.51     | 0.80     | 1.89     | 1.82     | 0.86     | 1.73     | 0.03     | 0.61     | 0.57     | 1.15     | 2.11     | 0.53     | 1.11     |
| GH40       | 0.00     | 0.00     | 0.00     | 0.00     | 0.00     | 0.00     | 0.00     | 0.00     | 0.00     | 0.00     | 0.00     | 0.00     | 0.00     | 0.00     | 0.00     | 0.00     | 0.00     | 0.00     | 0.00     | 0.00     | 0.00     |
| GT49       | 0.00     | 0.00     | 0.00     | 0.00     | 0.00     | 0.00     | 0.00     | 0.00     | 0.00     | 0.00     | 0.00     | 0.00     | 0.00     | 0.00     | 0.00     | 0.00     | 0.00     | 0.00     | 0.00     | 0.00     | 0.00     |
| GH112      | 0.07     | 0.12     | 0.06     | 0.19     | 0.10     | 0.14     | 0.20     | 0.13     | 0.24     | 0.09     | 0.03     | 0.08     | 0.10     | 0.19     | 0.25     | 0.17     | 0.17     | 0.13     | 0.03     | 0.10     | 0.12     |
| GT67       | 0.00     | 0.00     | 0.00     | 0.00     | 0.00     | 0.00     | 0.00     | 0.00     | 0.00     | 0.00     | 0.00     | 0.00     | 0.00     | 0.00     | 0.00     | 0.00     | 0.00     | 0.00     | 0.00     | 0.00     | 0.00     |
| CE8        | 0.05     | 0.20     | 0.26     | 0.11     | 0.22     | 0.24     | 0.22     | 0.15     | 0.08     | 0.15     | 0.26     | 0.32     | 0.03     | 0.23     | 0.06     | 0.13     | 0.11     | 0.09     | 0.22     | 0.15     | 0.09     |
| GT86       | 0.00     | 0.00     | 0.00     | 0.00     | 0.00     | 0.00     | 0.00     | 0.00     | 0.00     | 0.00     | 0.00     | 0.00     | 0.00     | 0.00     | 0.00     | 0.00     | 0.00     | 0.00     | 0.00     | 0.00     | 0.00     |
| GH101      | 0.02     | 0.05     | 0.00     | 0.06     | 0.00     | 0.02     | 0.01     | 0.00     | 0.05     | 0.00     | 0.00     | 0.03     | 0.00     | 0.00     | 0.00     | 0.06     | 0.00     | 0.00     | 0.00     | 0.04     | 0.05     |
| GH81       | 0.00     | 0.00     | 0.00     | 0.00     | 0.01     | 0.00     | 0.00     | 0.00     | 0.00     | 0.01     | 0.00     | 0.00     | 0.00     | 0.00     | 0.00     | 0.00     | 0.00     | 0.02     | 0.00     | 0.00     | 0.00     |
| GT93       | 0.00     | 0.00     | 0.00     | 0.00     | 0.00     | 0.00     | 0.00     | 0.00     | 0.00     | 0.00     | 0.00     | 0.00     | 0.00     | 0.00     | 0.00     | 0.00     | 0.00     | 0.00     | 0.00     | 0.00     | 0.00     |
| GT63       | 0.00     | 0.00     | 0.00     | 0.00     | 0.00     | 0.00     | 0.00     | 0.00     | 0.00     | 0.00     | 0.00     | 0.00     | 0.00     | 0.00     | 0.00     | 0.00     | 0.00     | 0.00     | 0.00     | 0.00     | 0.00     |
| CE11       | 0.24     | 0.22     | 0.24     | 0.19     | 0.29     | 0.21     | 0.21     | 0.23     | 0.25     | 0.12     | 0.15     | 0.22     | 0.14     | 0.15     | 0.09     | 0.15     | 0.11     | 0.20     | 0.22     | 0.10     | 0.14     |
| GT19       | 0.22     | 0.19     | 0.18     | 0.11     | 0.18     | 0.12     | 0.07     | 0.15     | 0.15     | 0.06     | 0.13     | 0.07     | 0.09     | 0.11     | 0.03     | 0.02     | 0.09     | 0.11     | 0.10     | 0.09     | 0.11     |
| GT33       | 0.00     | 0.00     | 0.00     | 0.00     | 0.00     | 0.00     | 0.00     | 0.00     | 0.00     | 0.00     | 0.00     | 0.00     | 0.00     | 0.00     | 0.00     | 0.00     | 0.00     | 0.00     | 0.00     | 0.00     | 0.00     |
| GH21       | 0.00     | 0.00     | 0.00     | 0.00     | 0.00     | 0.00     | 0.00     | 0.00     | 0.00     | 0.00     | 0.00     | 0.00     | 0.00     | 0.00     | 0.00     | 0.00     | 0.00     | 0.00     | 0.00     | 0.00     | 0.00     |
| GT68       | 0.00     | 0.00     | 0.00     | 0.00     | 0.00     | 0.00     | 0.00     | 0.00     | 0.00     | 0.00     | 0.00     | 0.00     | 0.00     | 0.00     | 0.00     | 0.00     | 0.00     | 0.00     | 0.00     | 0.00     | 0.00     |
| GH89       | 0.05     | 0.34     | 0.30     | 0.15     | 0.18     | 0.27     | 0.25     | 0.28     | 0.07     | 0.16     | 0.31     | 0.34     | 0.11     | 0.30     | 0.00     | 0.15     | 0.08     | 0.15     | 0.28     | 0.11     | 0.18     |
| GT82       | 0.00     | 0.00     | 0.00     | 0.00     | 0.00     | 0.00     | 0.00     | 0.00     | 0.00     | 0.00     | 0.00     | 0.00     | 0.00     | 0.00     | 0.00     | 0.00     | 0.00     | 0.00     | 0.00     | 0.00     | 0.00     |
| GH30       | 0.12     | 0.12     | 0.32     | 0.15     | 0.31     | 0.20     | 0.15     | 0.12     | 0.14     | 0.21     | 0.22     | 0.19     | 0.15     | 0.20     | 0.03     | 0.17     | 0.16     | 0.28     | 0.22     | 0.09     | 0.18     |
| GH20       | 0.34     | 1.25     | 1.21     | 0.95     | 1.21     | 1.05     | 1.13     | 1.14     | 0.30     | 0.76     | 1.05     | 0.96     | 0.88     | 1.20     | 0.00     | 0.40     | 0.33     | 1.24     | 1.55     | 0.61     | 0.58     |
| GH52       | 0.00     | 0.00     | 0.00     | 0.00     | 0.00     | 0.00     | 0.00     | 0.00     | 0.00     | 0.00     | 0.00     | 0.00     | 0.00     | 0.00     | 0.00     | 0.00     | 0.00     | 0.00     | 0.00     | 0.00     | 0.00     |
| GT84       | 0.00     | 0.00     | 0.00     | 0.00     | 0.00     | 0.00     | 0.00     | 0.02     | 0.02     | 0.01     | 0.00     | 0.00     | 0.02     | 0.03     | 0.00     | 0.00     | 0.00     | 0.07     | 0.00     | 0.00     | 0.00     |
| GT15       | 0.00     | 0.00     | 0.00     | 0.00     | 0.00     | 0.00     | 0.00     | 0.00     | 0.00     | 0.00     | 0.00     | 0.00     | 0.00     | 0.00     | 0.00     | 0.00     | 0.00     | 0.00     | 0.00     | 0.00     | 0.00     |
| GH93       | 0.00     | 0.00     | 0.04     | 0.00     | 0.00     | 0.00     | 0.01     | 0.00     | 0.00     | 0.00     | 0.01     | 0.00     | 0.01     | 0.00     | 0.00     | 0.00     | 0.00     | 0.00     | 0.01     | 0.00     | 0.00     |
| PL16       | 0.00     | 0.00     | 0.00     | 0.00     | 0.00     | 0.00     | 0.00     | 0.00     | 0.00     | 0.00     | 0.00     | 0.00     | 0.00     | 0.00     | 0.00     | 0.00     | 0.00     | 0.00     | 0.00     | 0.00     | 0.00     |
| GH26       | 0.02     | 0.22     | 0.02     | 0.11     | 0.08     | 0.06     | 0.03     | 0.03     | 0.00     | 0.05     | 0.05     | 0.00     | 0.12     | 0.07     | 0.00     | 0.00     | 0.22     | 0.09     | 0.07     | 0.10     | 0.04     |
| GT75       | 0.00     | 0.00     | 0.00     | 0.00     | 0.00     | 0.00     | 0.00     | 0.00     | 0.00     | 0.00     | 0.00     | 0.00     | 0.00     | 0.00     | 0.00     | 0.00     | 0.00     | 0.00     | 0.00     | 0.00     | 0.00     |
| GH53       | 0.02     | 0.09     | 0.02     | 0.06     | 0.12     | 0.06     | 0.04     | 0.15     | 0.10     | 0.02     | 0.03     | 0.02     | 0.03     | 0.08     | 0.00     | 0.06     | 0.17     | 0.11     | 0.07     | 0.01     | 0.02     |
| GT88       | 0.00     | 0.00     | 0.00     | 0.00     | 0.00     | 0.00     | 0.00     | 0.00     | 0.00     | 0.00     | 0.00     | 0.00     | 0.00     | 0.00     | 0.00     | 0.00     | 0.00     | 0.00     | 0.00     | 0.00     | 0.00     |
| GT24       | 0.00     | 0.00     | 0.00     | 0.00     | 0.00     | 0.00     | 0.00     | 0.00     | 0.00     | 0.00     | 0.00     | 0.00     | 0.00     | 0.00     | 0.00     | 0.00     | 0.00     | 0.00     | 0.00     | 0.00     | 0.00     |
| GT81       | 0.00     | 0.00     | 0.00     | 0.00     | 0.00     | 0.00     | 0.00     | 0.00     | 0.00     | 0.00     | 0.00     | 0.00     | 0.00     | 0.00     | 0.00     | 0.00     | 0.00     | 0.00     | 0.00     | 0.00     | 0.00     |
| GH4        | 0.12     | 0.26     | 0.14     | 0.38     | 0.10     | 0.17     | 0.07     | 0.13     | 0.08     | 0.06     | 0.11     | 0.12     | 0.19     | 0.19     | 0.50     | 0.02     | 0.16     | 0.07     | 0.07     | 0.16     | 0.30     |
| GT78       | 0.00     | 0.00     | 0.00     | 0.00     | 0.00     | 0.00     | 0.00     | 0.00     | 0.00     | 0.00     | 0.00     | 0.00     | 0.00     | 0.00     | 0.00     | 0.00     | 0.00     | 0.00     | 0.00     | 0.00     | 0.00     |
| GH8        | 0.02     | 0.02     | 0.04     | 0.06     | 0.05     | 0.03     | 0.01     | 0.03     | 0.05     | 0.02     | 0.03     | 0.02     | 0.02     | 0.05     | 0.03     | 0.02     | 0.12     | 0.02     | 0.01     | 0.01     | 0.02     |
| GH70       | 0.00     | 0.00     | 0.00     | 0.00     | 0.00     | 0.00     | 0.00     | 0.00     | 0.00     | 0.00     | 0.00     | 0.00     | 0.00     | 0.00     | 0.00     | 0.00     | 0.00     | 0.00     | 0.00     | 0.00     | 0.00     |
| GH122      | 0.00     | 0.00     | 0.00     | 0.00     | 0.00     | 0.00     | 0.00     | 0.00     | 0.00     | 0.00     | 0.00     | 0.00     | 0.00     | 0.00     | 0.00     | 0.00     | 0.00     | 0.00     | 0.00     | 0.00     | 0.00     |
| GH74       | 0.00     | 0.00     | 0.00     | 0.00     | 0.00     | 0.00     | 0.00     | 0.00     | 0.00     | 0.00     | 0.00     | 0.00     | 0.02     | 0.01     | 0.00     | 0.00     | 0.03     | 0.00     | 0.00     | 0.03     | 0.00     |
| GT41       | 0.02     | 0.00     | 0.00     | 0.00     | 0.00     | 0.02     | 0.01     | 0.02     | 0.00     | 0.01     | 0.00     | 0.00     | 0.00     | 0.00     | 0.00     | 0.00     | 0.01     | 0.00     | 0.00     | 0.00     | 0.00     |

| CAZY_group | CN-AD-22 | CN-AD-23 | CN-AD-24 | CN-AD-25 | CN-AD-26 | CN-AD-27 | CN-AD-28 | CN-AD-29 | CN-AD-30 | CN-AD-31 | CN-AD-32 | CN-AD-33 | CN-AD-34 | CN-AD-35 | CN-AD-36 | CN-AD-37 | CN-AD-38 | CN-AD-39 | CN-AD-40 | CN-AD-41 | CN-AD-42 |
|------------|----------|----------|----------|----------|----------|----------|----------|----------|----------|----------|----------|----------|----------|----------|----------|----------|----------|----------|----------|----------|----------|
| PL1        | 0.10     | 0.28     | 0.40     | 0.13     | 0.34     | 0.21     | 0.36     | 0.20     | 0.10     | 0.17     | 0.27     | 0.27     | 0.03     | 0.30     | 0.03     | 0.08     | 0.07     | 0.09     | 0.25     | 0.06     | 0.14     |
| GH15       | 0.02     | 0.05     | 0.04     | 0.04     | 0.03     | 0.03     | 0.03     | 0.05     | 0.02     | 0.01     | 0.01     | 0.00     | 0.05     | 0.04     | 0.00     | 0.02     | 0.03     | 0.00     | 0.03     | 0.04     | 0.02     |
| GH32       | 0.24     | 0.62     | 0.46     | 0.59     | 0.31     | 0.24     | 0.41     | 0.33     | 0.54     | 0.16     | 0.27     | 0.32     | 0.17     | 0.44     | 0.19     | 0.49     | 0.37     | 0.26     | 0.45     | 0.36     | 0.37     |
| GH44       | 0.00     | 0.00     | 0.00     | 0.00     | 0.00     | 0.00     | 0.00     | 0.00     | 0.00     | 0.00     | 0.00     | 0.00     | 0.00     | 0.00     | 0.00     | 0.00     | 0.00     | 0.00     | 0.00     | 0.00     | 0.00     |
| GT6        | 0.00     | 0.00     | 0.00     | 0.00     | 0.00     | 0.00     | 0.01     | 0.00     | 0.02     | 0.00     | 0.00     | 0.00     | 0.00     | 0.00     | 0.00     | 0.00     | 0.00     | 0.00     | 0.00     | 0.00     | 0.00     |
| GH13       | 2.13     | 2.25     | 2.10     | 3.43     | 2.15     | 2.15     | 2.63     | 2.58     | 2.98     | 2.27     | 1.12     | 2.36     | 1.56     | 2.22     | 1.77     | 2.83     | 2.48     | 1.86     | 1.88     | 1.95     | 1.74     |
| GT80       | 0.05     | 0.00     | 0.02     | 0.02     | 0.01     | 0.00     | 0.00     | 0.00     | 0.00     | 0.01     | 0.00     | 0.02     | 0.02     | 0.01     | 0.00     | 0.00     | 0.01     | 0.00     | 0.00     | 0.01     | 0.02     |
| GH71       | 0.00     | 0.00     | 0.00     | 0.00     | 0.00     | 0.00     | 0.00     | 0.00     | 0.00     | 0.00     | 0.00     | 0.00     | 0.00     | 0.00     | 0.00     | 0.00     | 0.00     | 0.00     | 0.00     | 0.00     | 0.00     |
| GH63       | 0.12     | 0.08     | 0.04     | 0.15     | 0.10     | 0.11     | 0.10     | 0.10     | 0.05     | 0.07     | 0.03     | 0.08     | 0.06     | 0.07     | 0.16     | 0.11     | 0.09     | 0.11     | 0.01     | 0.04     | 0.04     |
| PL21       | 0.00     | 0.05     | 0.06     | 0.00     | 0.05     | 0.03     | 0.06     | 0.05     | 0.00     | 0.02     | 0.07     | 0.03     | 0.00     | 0.03     | 0.00     | 0.00     | 0.00     | 0.00     | 0.00     | 0.06     | 0.00     |
| GH65       | 0.12     | 0.19     | 0.14     | 0.21     | 0.16     | 0.08     | 0.08     | 0.07     | 0.05     | 0.15     | 0.05     | 0.12     | 0.05     | 0.07     | 0.41     | 0.11     | 0.20     | 0.22     | 0.12     | 0.10     | 0.07     |
| CE4        | 0.29     | 0.40     | 0.38     | 0.40     | 0.38     | 0.52     | 0.42     | 0.43     | 0.59     | 0.47     | 0.22     | 0.35     | 0.37     | 0.51     | 0.38     | 0.38     | 0.54     | 0.39     | 0.39     | 0.41     | 0.40     |
| CE14       | 0.02     | 0.03     | 0.02     | 0.02     | 0.02     | 0.02     | 0.03     | 0.00     | 0.02     | 0.05     | 0.00     | 0.00     | 0.01     | 0.00     | 0.06     | 0.00     | 0.01     | 0.02     | 0.01     | 0.00     | 0.02     |
| GH115      | 0.05     | 0.37     | 0.16     | 0.06     | 0.27     | 0.29     | 0.22     | 0.17     | 0.14     | 0.09     | 0.24     | 0.25     | 0.07     | 0.19     | 0.03     | 0.13     | 0.15     | 0.13     | 0.20     | 0.00     | 0.19     |
| GH104      | 0.02     | 0.00     | 0.00     | 0.04     | 0.00     | 0.00     | 0.00     | 0.00     | 0.00     | 0.00     | 0.00     | 0.00     | 0.00     | 0.00     | 0.00     | 0.00     | 0.00     | 0.00     | 0.00     | 0.00     | 0.04     |
| GH111      | 0.00     | 0.00     | 0.00     | 0.00     | 0.00     | 0.00     | 0.00     | 0.00     | 0.00     | 0.00     | 0.00     | 0.00     | 0.00     | 0.00     | 0.00     | 0.00     | 0.00     | 0.00     | 0.00     | 0.00     | 0.00     |
| GH95       | 0.15     | 0.69     | 0.75     | 0.53     | 0.72     | 0.58     | 0.69     | 0.56     | 0.30     | 0.36     | 0.49     | 0.57     | 0.37     | 0.65     | 0.03     | 0.36     | 0.29     | 0.59     | 0.67     | 0.28     | 0.28     |
| GT70       | 0.00     | 0.00     | 0.00     | 0.00     | 0.00     | 0.00     | 0.00     | 0.00     | 0.00     | 0.00     | 0.00     | 0.00     | 0.00     | 0.00     | 0.00     | 0.00     | 0.00     | 0.00     | 0.00     | 0.00     | 0.00     |
| CE10       | 0.12     | 0.25     | 0.30     | 0.21     | 0.20     | 0.26     | 0.18     | 0.20     | 0.02     | 0.10     | 0.22     | 0.20     | 0.10     | 0.08     | 0.06     | 0.04     | 0.13     | 0.13     | 0.17     | 0.18     | 0.14     |
| GH10       | 0.00     | 0.09     | 0.08     | 0.02     | 0.14     | 0.06     | 0.11     | 0.12     | 0.03     | 0.05     | 0.07     | 0.05     | 0.05     | 0.05     | 0.00     | 0.02     | 0.05     | 0.15     | 0.12     | 0.04     | 0.09     |
| GH130      | 0.07     | 0.40     | 0.30     | 0.11     | 0.25     | 0.35     | 0.29     | 0.17     | 0.15     | 0.23     | 0.28     | 0.15     | 0.25     | 0.32     | 0.00     | 0.11     | 0.17     | 0.26     | 0.36     | 0.09     | 0.11     |
| PL20       | 0.00     | 0.00     | 0.00     | 0.00     | 0.00     | 0.00     | 0.00     | 0.00     | 0.00     | 0.00     | 0.00     | 0.00     | 0.00     | 0.00     | 0.00     | 0.00     | 0.00     | 0.00     | 0.00     | 0.00     | 0.00     |
| GH69       | 0.00     | 0.00     | 0.00     | 0.00     | 0.00     | 0.00     | 0.00     | 0.00     | 0.00     | 0.00     | 0.00     | 0.00     | 0.00     | 0.00     | 0.00     | 0.00     | 0.00     | 0.00     | 0.00     | 0.00     | 0.00     |
| PL2        | 0.00     | 0.02     | 0.00     | 0.00     | 0.00     | 0.00     | 0.00     | 0.00     | 0.00     | 0.00     | 0.00     | 0.00     | 0.00     | 0.00     | 0.00     | 0.00     | 0.00     | 0.00     | 0.00     | 0.00     | 0.00     |
| GH49       | 0.00     | 0.00     | 0.00     | 0.00     | 0.00     | 0.00     | 0.00     | 0.00     | 0.00     | 0.00     | 0.00     | 0.00     | 0.00     | 0.00     | 0.00     | 0.00     | 0.00     | 0.00     | 0.00     | 0.00     | 0.00     |
| GH25       | 0.22     | 0.26     | 0.24     | 0.29     | 0.27     | 0.35     | 0.38     | 0.35     | 0.30     | 0.23     | 0.22     | 0.34     | 0.19     | 0.23     | 0.57     | 0.65     | 0.26     | 0.22     | 0.27     | 0.29     | 0.25     |
| GH59       | 0.00     | 0.00     | 0.00     | 0.00     | 0.00     | 0.00     | 0.00     | 0.00     | 0.00     | 0.01     | 0.00     | 0.00     | 0.01     | 0.03     | 0.00     | 0.00     | 0.01     | 0.00     | 0.00     | 0.04     | 0.00     |
| GH35       | 0.10     | 0.40     | 0.48     | 0.42     | 0.35     | 0.32     | 0.31     | 0.30     | 0.14     | 0.20     | 0.54     | 0.46     | 0.33     | 0.43     | 0.13     | 0.13     | 0.21     | 0.33     | 0.43     | 0.18     | 0.23     |
| GT39       | 0.00     | 0.00     | 0.00     | 0.00     | 0.00     | 0.00     | 0.00     | 0.02     | 0.00     | 0.00     | 0.00     | 0.00     | 0.00     | 0.01     | 0.00     | 0.00     | 0.00     | 0.02     | 0.00     | 0.00     | 0.00     |
| GT57       | 0.00     | 0.00     | 0.00     | 0.00     | 0.00     | 0.00     | 0.00     | 0.00     | 0.00     | 0.00     | 0.00     | 0.00     | 0.00     | 0.00     | 0.00     | 0.00     | 0.00     | 0.00     | 0.00     | 0.00     | 0.00     |
| GH129      | 0.00     | 0.00     | 0.00     | 0.04     | 0.00     | 0.00     | 0.01     | 0.00     | 0.03     | 0.00     | 0.00     | 0.00     | 0.02     | 0.00     | 0.00     | 0.04     | 0.00     | 0.00     | 0.00     | 0.00     | 0.04     |
| GT22       | 0.00     | 0.00     | 0.00     | 0.00     | 0.00     | 0.00     | 0.00     | 0.00     | 0.00     | 0.00     | 0.00     | 0.00     | 0.00     | 0.00     | 0.00     | 0.00     | 0.00     | 0.00     | 0.00     | 0.00     | 0.00     |
| PL12       | 0.05     | 0.11     | 0.26     | 0.02     | 0.16     | 0.11     | 0.13     | 0.12     | 0.02     | 0.09     | 0.12     | 0.10     | 0.02     | 0.11     | 0.00     | 0.00     | 0.04     | 0.17     | 0.10     | 0.06     | 0.04     |
| PL18       | 0.00     | 0.00     | 0.00     | 0.00     | 0.00     | 0.00     | 0.00     | 0.00     | 0.00     | 0.00     | 0.00     | 0.00     | 0.00     | 0.00     | 0.00     | 0.00     | 0.00     | 0.00     | 0.00     | 0.00     | 0.00     |
| GT92       | 0.00     | 0.00     | 0.00     | 0.00     | 0.00     | 0.00     | 0.00     | 0.00     | 0.00     | 0.00     | 0.00     | 0.00     | 0.00     | 0.00     | 0.00     | 0.00     | 0.00     | 0.00     | 0.00     | 0.00     | 0.00     |
| GT44       | 0.00     | 0.00     | 0.00     | 0.00     | 0.00     | 0.00     | 0.00     | 0.00     | 0.00     | 0.00     | 0.00     | 0.00     | 0.00     | 0.00     | 0.00     | 0.00     | 0.00     | 0.00     | 0.00     | 0.01     | 0.00     |
| GT29       | 0.00     | 0.00     | 0.00     | 0.00     | 0.00     | 0.00     | 0.00     | 0.00     | 0.00     | 0.00     | 0.00     | 0.00     | 0.00     | 0.00     | 0.00     | 0.00     | 0.00     | 0.00     | 0.00     | 0.00     | 0.00     |
| GT13       | 0.00     | 0.00     | 0.00     | 0.00     | 0.00     | 0.00     | 0.00     | 0.00     | 0.00     | 0.00     | 0.00     | 0.00     | 0.00     | 0.00     | 0.00     | 0.00     | 0.00     | 0.00     | 0.00     | 0.00     | 0.00     |
| GT52       | 0.00     | 0.00     | 0.00     | 0.00     | 0.00     | 0.00     | 0.00     | 0.00     | 0.00     | 0.00     | 0.00     | 0.00     | 0.00     | 0.00     | 0.00     | 0.00     | 0.00     | 0.00     | 0.00     | 0.00     | 0.00     |
| GT64       | 0.00     | 0.00     | 0.00     | 0.00     | 0.00     | 0.00     | 0.00     | 0.00     | 0.00     | 0.00     | 0.00     | 0.00     | 0.00     | 0.00     | 0.00     | 0.00     | 0.00     | 0.00     | 0.00     | 0.00     | 0.00     |
| GT85       | 0.00     | 0.00     | 0.00     | 0.00     | 0.00     | 0.00     | 0.00     | 0.00     | 0.00     | 0.00     | 0.00     | 0.00     | 0.00     | 0.00     | 0.00     | 0.00     | 0.00     | 0.00     | 0.00     | 0.00     | 0.00     |
| GT16       | 0.00     | 0.00     | 0.00     | 0.00     | 0.00     | 0.00     | 0.00     | 0.00     | 0.00     | 0.00     | 0.00     | 0.00     | 0.00     | 0.00     | 0.00     | 0.00     | 0.00     | 0.00     | 0.00     | 0.00     | 0.00     |
| GH56       | 0.00     | 0.00     | 0.00     | 0.00     | 0.00     | 0.00     | 0.00     | 0.00     | 0.00     | 0.00     | 0.00     | 0.00     | 0.00     | 0.00     | 0.00     | 0.00     | 0.00     | 0.00     | 0.00     | 0.00     | 0.00     |
| GT60       | 0.00     | 0.00     | 0.00     | 0.00     | 0.00     | 0.00     | 0.00     | 0.00     | 0.00     | 0.00     | 0.00     | 0.00     | 0.00     | 0.00     | 0.00     | 0.00     | 0.00     | 0.00     | 0.00     | 0.00     | 0.00     |
| GH41       | 0.00     | 0.00     | 0.00     | 0.00     | 0.00     | 0.00     | 0.00     | 0.00     | 0.00     | 0.00     | 0.00     | 0.00     | 0.00     | 0.00     | 0.00     | 0.00     | 0.00     | 0.00     | 0.00     | 0.00     | 0.00     |
| CE7        | 0.07     | 0.14     | 0.14     | 0.08     | 0.11     | 0.09     | 0.08     | 0.05     | 0.03     | 0.04     | 0.20     | 0.08     | 0.05     | 0.13     | 0.00     | 0.04     | 0.07     | 0.07     | 0.13     | 0.03     | 0.16     |
| GH39       | 0.00     | 0.08     | 0.00     | 0.06     | 0.00     | 0.02     | 0.00     | 0.03     | 0.02     | 0.00     | 0.01     | 0.00     | 0.00     | 0.05     | 0.03     | 0.04     | 0.04     | 0.00     | 0.00     | 0.03     | 0.04     |
| GT30       | 0.24     | 0.29     | 0.38     | 0.34     | 0.28     | 0.35     | 0.24     | 0.30     | 0.24     | 0.15     | 0.24     | 0.29     | 0.19     | 0.28     | 0.03     | 0.15     | 0.16     | 0.33     | 0.25     | 0.15     | 0.25     |
| PL15       | 0.00     | 0.12     | 0.26     | 0.00     | 0.18     | 0.17     | 0.18     | 0.05     | 0.00     | 0.16     | 0.19     | 0.07     | 0.03     | 0.11     | 0.00     | 0.00     | 0.01     | 0.04     | 0.16     | 0.01     | 0.09     |
| GH102      | 0.02     | 0.08     | 0.08     | 0.04     | 0.00     | 0.02     | 0.04     | 0.02     | 0.02     | 0.02     | 0.03     | 0.03     | 0.02     | 0.01     | 0.06     | 0.06     | 0.07     | 0.00     | 0.00     | 0.08     | 0.07     |







| CAZY_group   | CN-AD-43 | CN-AD-44 | CN-AD-45 | CN-AD-46 | CN-AD-47 | CN-AD-48 | CN-AD-49 | CN-AD-50 | CN-AD-51 | CN-AD-52 | CN-AD-53 | CN-AD-54 | CN-AD-55 | CN-AD-56 | CN-AD-57 | CN-AD-58 | CN-AD-59 | CN-AD-60 | CN-AD-61 | CN-AD-62 | CN-AD-63 |
|--------------|----------|----------|----------|----------|----------|----------|----------|----------|----------|----------|----------|----------|----------|----------|----------|----------|----------|----------|----------|----------|----------|
| <b>GH34</b>  | 0.00     | 0.00     | 0.00     | 0.00     | 0.00     | 0.00     | 0.00     | 0.00     | 0.00     | 0.00     | 0.00     | 0.00     | 0.00     | 0.00     | 0.00     | 0.00     | 0.00     | 0.00     | 0.00     | 0.00     | 0.00     |
| <b>GT14</b>  | 0.00     | 0.00     | 0.02     | 0.05     | 0.00     | 0.04     | 0.04     | 0.00     | 0.04     | 0.00     | 0.02     | 0.02     | 0.02     | 0.00     | 0.01     | 0.02     | 0.00     | 0.03     | 0.05     | 0.00     | 0.04     |
| <b>GH47</b>  | 0.00     | 0.00     | 0.00     | 0.00     | 0.00     | 0.00     | 0.00     | 0.00     | 0.00     | 0.00     | 0.00     | 0.00     | 0.00     | 0.00     | 0.00     | 0.00     | 0.00     | 0.00     | 0.00     | 0.00     | 0.00     |
| <b>GH97</b>  | 0.94     | 0.11     | 0.88     | 1.17     | 0.39     | 0.50     | 1.01     | 0.64     | 1.04     | 0.26     | 1.07     | 0.76     | 0.76     | 0.62     | 0.67     | 1.30     | 0.34     | 0.59     | 1.16     | 0.16     | 0.97     |
| <b>GH50</b>  | 0.09     | 0.00     | 0.08     | 0.11     | 0.00     | 0.00     | 0.02     | 0.08     | 0.10     | 0.00     | 0.04     | 0.07     | 0.07     | 0.00     | 0.07     | 0.02     | 0.02     | 0.00     | 0.09     | 0.00     | 0.02     |
| <b>GT26</b>  | 0.09     | 0.13     | 0.17     | 0.16     | 0.20     | 0.15     | 0.21     | 0.16     | 0.11     | 0.17     | 0.09     | 0.12     | 0.14     | 0.11     | 0.20     | 0.19     | 0.16     | 0.20     | 0.17     | 0.10     | 0.14     |
| <b>GH18</b>  | 0.52     | 0.39     | 0.51     | 0.50     | 0.12     | 0.42     | 0.58     | 0.42     | 0.47     | 0.26     | 0.54     | 0.67     | 0.53     | 0.35     | 0.51     | 0.31     | 0.32     | 0.43     | 0.61     | 0.24     | 0.41     |
| <b>GH37</b>  | 0.07     | 0.05     | 0.00     | 0.05     | 0.00     | 0.04     | 0.00     | 0.02     | 0.04     | 0.03     | 0.04     | 0.03     | 0.00     | 0.04     | 0.00     | 0.00     | 0.00     | 0.03     | 0.00     | 0.00     | 0.00     |
| <b>PL13</b>  | 0.07     | 0.00     | 0.03     | 0.05     | 0.00     | 0.00     | 0.09     | 0.06     | 0.04     | 0.00     | 0.04     | 0.07     | 0.02     | 0.00     | 0.07     | 0.02     | 0.02     | 0.00     | 0.03     | 0.02     | 0.05     |
| <b>GH27</b>  | 0.17     | 0.11     | 0.23     | 0.25     | 0.08     | 0.04     | 0.11     | 0.10     | 0.27     | 0.09     | 0.16     | 0.21     | 0.22     | 0.05     | 0.19     | 0.40     | 0.08     | 0.19     | 0.43     | 0.08     | 0.34     |
| <b>GT54</b>  | 0.00     | 0.00     | 0.00     | 0.00     | 0.00     | 0.00     | 0.00     | 0.00     | 0.00     | 0.00     | 0.00     | 0.00     | 0.00     | 0.00     | 0.00     | 0.00     | 0.00     | 0.00     | 0.00     | 0.00     | 0.00     |
| <b>GT91</b>  | 0.00     | 0.00     | 0.00     | 0.00     | 0.00     | 0.00     | 0.00     | 0.00     | 0.00     | 0.00     | 0.00     | 0.00     | 0.00     | 0.00     | 0.00     | 0.00     | 0.00     | 0.00     | 0.00     | 0.00     | 0.00     |
| <b>GT72</b>  | 0.00     | 0.00     | 0.00     | 0.00     | 0.00     | 0.00     | 0.00     | 0.00     | 0.00     | 0.00     | 0.00     | 0.00     | 0.00     | 0.00     | 0.00     | 0.00     | 0.00     | 0.00     | 0.00     | 0.00     | 0.00     |
| <b>GH67</b>  | 0.04     | 0.02     | 0.03     | 0.09     | 0.08     | 0.02     | 0.15     | 0.04     | 0.06     | 0.09     | 0.02     | 0.03     | 0.05     | 0.05     | 0.06     | 0.09     | 0.04     | 0.03     | 0.20     | 0.00     | 0.11     |
| <b>GH12</b>  | 0.00     | 0.00     | 0.00     | 0.00     | 0.00     | 0.00     | 0.00     | 0.00     | 0.00     | 0.00     | 0.00     | 0.00     | 0.00     | 0.00     | 0.00     | 0.00     | 0.00     | 0.00     | 0.00     | 0.00     | 0.00     |
| <b>GH91</b>  | 0.00     | 0.02     | 0.07     | 0.02     | 0.00     | 0.00     | 0.02     | 0.00     | 0.04     | 0.00     | 0.04     | 0.03     | 0.01     | 0.04     | 0.01     | 0.05     | 0.02     | 0.01     | 0.02     | 0.03     | 0.00     |
| <b>GT69</b>  | 0.00     | 0.00     | 0.00     | 0.00     | 0.00     | 0.00     | 0.00     | 0.00     | 0.00     | 0.00     | 0.00     | 0.00     | 0.00     | 0.00     | 0.00     | 0.00     | 0.00     | 0.00     | 0.00     | 0.00     | 0.00     |
| <b>GH106</b> | 0.33     | 0.16     | 0.18     | 0.34     | 0.20     | 0.08     | 0.34     | 0.34     | 0.56     | 0.03     | 0.24     | 0.24     | 0.19     | 0.34     | 0.27     | 0.28     | 0.10     | 0.24     | 0.32     | 0.02     | 0.27     |
| <b>GT62</b>  | 0.00     | 0.00     | 0.00     | 0.00     | 0.00     | 0.00     | 0.00     | 0.00     | 0.00     | 0.00     | 0.00     | 0.00     | 0.00     | 0.00     | 0.00     | 0.00     | 0.00     | 0.00     | 0.00     | 0.00     | 0.00     |
| <b>GH17</b>  | 0.00     | 0.00     | 0.00     | 0.00     | 0.00     | 0.00     | 0.00     | 0.00     | 0.00     | 0.00     | 0.00     | 0.00     | 0.00     | 0.00     | 0.00     | 0.00     | 0.00     | 0.00     | 0.00     | 0.00     | 0.00     |
| <b>GH88</b>  | 0.50     | 0.02     | 0.36     | 0.39     | 0.04     | 0.27     | 0.36     | 0.22     | 0.47     | 0.06     | 0.47     | 0.35     | 0.35     | 0.14     | 0.39     | 0.59     | 0.14     | 0.25     | 0.58     | 0.11     | 0.34     |
| <b>CE5</b>   | 0.00     | 0.00     | 0.00     | 0.00     | 0.00     | 0.00     | 0.00     | 0.00     | 0.00     | 0.00     | 0.00     | 0.00     | 0.00     | 0.00     | 0.00     | 0.00     | 0.00     | 0.00     | 0.00     | 0.00     | 0.00     |
| <b>GT8</b>   | 0.13     | 0.08     | 0.08     | 0.16     | 0.04     | 0.23     | 0.04     | 0.06     | 0.06     | 0.09     | 0.15     | 0.10     | 0.03     | 0.23     | 0.10     | 0.09     | 0.06     | 0.05     | 0.14     | 0.06     | 0.09     |
| <b>GT50</b>  | 0.00     | 0.00     | 0.00     | 0.00     | 0.00     | 0.00     | 0.00     | 0.00     | 0.00     | 0.00     | 0.00     | 0.00     | 0.00     | 0.00     | 0.00     | 0.00     | 0.00     | 0.00     | 0.00     | 0.00     | 0.00     |
| <b>GT20</b>  | 0.13     | 0.03     | 0.12     | 0.16     | 0.04     | 0.15     | 0.11     | 0.06     | 0.11     | 0.00     | 0.11     | 0.10     | 0.08     | 0.05     | 0.05     | 0.17     | 0.06     | 0.10     | 0.09     | 0.05     | 0.05     |
| <b>PL9</b>   | 0.07     | 0.08     | 0.08     | 0.07     | 0.16     | 0.00     | 0.17     | 0.08     | 0.06     | 0.09     | 0.15     | 0.07     | 0.07     | 0.02     | 0.06     | 0.05     | 0.02     | 0.04     | 0.07     | 0.15     | 0.13     |
| <b>GH55</b>  | 0.00     | 0.00     | 0.02     | 0.02     | 0.08     | 0.02     | 0.02     | 0.02     | 0.03     | 0.00     | 0.00     | 0.03     | 0.03     | 0.02     | 0.04     | 0.02     | 0.00     | 0.03     | 0.07     | 0.05     | 0.01     |
| <b>GH64</b>  | 0.00     | 0.00     | 0.00     | 0.00     | 0.00     | 0.00     | 0.00     | 0.00     | 0.00     | 0.00     | 0.00     | 0.00     | 0.00     | 0.00     | 0.00     | 0.00     | 0.00     | 0.00     | 0.00     | 0.00     | 0.00     |
| <b>GH127</b> | 0.22     | 0.27     | 0.15     | 0.30     | 0.16     | 0.17     | 0.26     | 0.18     | 0.39     | 0.32     | 0.22     | 0.29     | 0.23     | 0.21     | 0.21     | 0.31     | 0.18     | 0.24     | 0.43     | 0.15     | 0.30     |
| <b>GH103</b> | 0.04     | 0.02     | 0.00     | 0.02     | 0.00     | 0.02     | 0.00     | 0.00     | 0.01     | 0.00     | 0.02     | 0.02     | 0.00     | 0.05     | 0.01     | 0.00     | 0.00     | 0.03     | 0.00     | 0.00     | 0.00     |
| <b>GH3</b>   | 2.27     | 1.77     | 2.59     | 2.54     | 1.58     | 2.09     | 2.18     | 2.57     | 2.14     | 1.91     | 2.74     | 1.73     | 2.07     | 1.35     | 2.22     | 2.24     | 1.70     | 1.95     | 3.34     | 1.89     | 2.41     |
| <b>GT45</b>  | 0.00     | 0.00     | 0.00     | 0.00     | 0.00     | 0.00     | 0.00     | 0.00     | 0.00     | 0.00     | 0.00     | 0.00     | 0.00     | 0.00     | 0.00     | 0.00     | 0.00     | 0.00     | 0.00     | 0.00     | 0.00     |
| <b>GT74</b>  | 0.00     | 0.00     | 0.00     | 0.00     | 0.00     | 0.00     | 0.00     | 0.00     | 0.00     | 0.00     | 0.00     | 0.00     | 0.00     | 0.00     | 0.00     | 0.00     | 0.00     | 0.00     | 0.00     | 0.00     | 0.00     |
| <b>GT90</b>  | 0.00     | 0.00     | 0.02     | 0.00     | 0.00     | 0.00     | 0.00     | 0.02     | 0.00     | 0.00     | 0.00     | 0.00     | 0.00     | 0.00     | 0.00     | 0.00     | 0.00     | 0.00     | 0.00     | 0.00     | 0.00     |
| <b>GH116</b> | 0.02     | 0.00     | 0.07     | 0.07     | 0.12     | 0.10     | 0.13     | 0.02     | 0.05     | 0.00     | 0.11     | 0.07     | 0.07     | 0.05     | 0.10     | 0.12     | 0.02     | 0.09     | 0.09     | 0.05     | 0.06     |
| <b>GH31</b>  | 1.05     | 0.97     | 0.91     | 0.89     | 0.67     | 0.90     | 0.69     | 0.72     | 1.02     | 0.52     | 0.89     | 0.76     | 0.72     | 0.43     | 0.80     | 0.90     | 0.71     | 0.96     | 1.23     | 0.68     | 1.03     |
| <b>GT12</b>  | 0.00     | 0.00     | 0.00     | 0.00     | 0.00     | 0.00     | 0.00     | 0.00     | 0.00     | 0.00     | 0.00     | 0.00     | 0.00     | 0.00     | 0.00     | 0.00     | 0.00     | 0.00     | 0.00     | 0.00     | 0.00     |
| <b>CE1</b>   | 0.35     | 0.17     | 0.36     | 0.30     | 0.24     | 0.27     | 0.45     | 0.32     | 0.33     | 0.09     | 0.36     | 0.40     | 0.24     | 0.23     | 0.29     | 0.52     | 0.18     | 0.24     | 0.48     | 0.16     | 0.30     |
| <b>GH121</b> | 0.00     | 0.03     | 0.02     | 0.00     | 0.00     | 0.00     | 0.00     | 0.10     | 0.00     | 0.06     | 0.00     | 0.00     | 0.00     | 0.00     | 0.00     | 0.00     | 0.00     | 0.00     | 0.00     | 0.02     | 0.00     |
| <b>GH79</b>  | 0.00     | 0.00     | 0.00     | 0.14     | 0.00     | 0.00     | 0.00     | 0.00     | 0.00     | 0.00     | 0.00     | 0.00     | 0.00     | 0.00     | 0.00     | 0.00     | 0.00     | 0.00     | 0.00     | 0.00     | 0.01     |
| <b>GT73</b>  | 0.00     | 0.00     | 0.00     | 0.00     | 0.00     | 0.00     | 0.00     | 0.00     | 0.00     | 0.00     | 0.00     | 0.00     | 0.00     | 0.04     | 0.00     | 0.00     | 0.00     | 0.00     | 0.00     | 0.00     | 0.00     |
| <b>GH77</b>  | 0.26     | 0.45     | 0.51     | 0.34     | 0.51     | 0.29     | 0.32     | 0.34     | 0.39     | 0.66     | 0.31     | 0.22     | 0.49     | 0.34     | 0.45     | 0.40     | 0.39     | 0.34     | 0.44     | 0.63     | 0.44     |
| <b>PL17</b>  | 0.02     | 0.02     | 0.00     | 0.00     | 0.04     | 0.00     | 0.00     | 0.00     | 0.00     | 0.00     | 0.00     | 0.00     | 0.02     | 0.00     | 0.00     | 0.00     | 0.02     | 0.00     | 0.00     | 0.03     | 0.04     |
| <b>PL8</b>   | 0.37     | 0.00     | 0.40     | 0.28     | 0.12     | 0.04     | 0.24     | 0.20     | 0.43     | 0.00     | 0.33     | 0.31     | 0.34     | 0.14     | 0.33     | 0.42     | 0.16     | 0.21     | 0.46     | 0.15     | 0.40     |
| <b>CE9</b>   | 0.35     | 0.39     | 0.31     | 0.30     | 0.36     | 0.31     | 0.41     | 0.40     | 0.24     | 0.32     | 0.25     | 0.43     | 0.35     | 0.21     | 0.37     | 0.28     | 0.36     | 0.34     | 0.36     | 0.26     | 0.22     |
| <b>CE15</b>  | 0.00     | 0.00     | 0.03     | 0.05     | 0.04     | 0.04     | 0.00     | 0.00     | 0.01     | 0.00     | 0.00     | 0.02     | 0.00     | 0.00     | 0.05     | 0.05     | 0.00     | 0.01     | 0.00     | 0.00     | 0.01     |
| <b>GT79</b>  | 0.00     | 0.00     | 0.00     | 0.00     | 0.00     | 0.00     | 0.00     | 0.00     | 0.00     | 0.00     | 0.00     | 0.00     | 0.00     | 0.00     | 0.00     | 0.00     | 0.00     | 0.00     | 0.00     | 0.00     | 0.00     |
| <b>GT10</b>  | 0.02     | 0.00     | 0.00     | 0.00     | 0.00     | 0.02     | 0.00     | 0.06     | 0.00     | 0.00     | 0.00     | 0.00     | 0.00     | 0.00     | 0.01     | 0.00     | 0.00     | 0.00     | 0.00     | 0.00     | 0.02     |
| <b>GH119</b> | 0.00     | 0.00     | 0.00     | 0.00     | 0.00     | 0.00     | 0.00     | 0.00     | 0.00     | 0.00     | 0.00     | 0.00     | 0.00     | 0.00     | 0.00     | 0.00     | 0.00     | 0.00     | 0.00     | 0.00     | 0.00     |
| <b>GH16</b>  | 0.20     | 0.02     | 0.21     | 0.16     | 0.04     | 0.15     | 0.17     | 0.16     | 0.18     | 0.00     | 0.31     | 0.21     | 0.30     | 0.16     | 0.24     | 0.24     | 0.06     | 0.19     | 0.36     | 0.10     | 0.17     |
| <b>GH43</b>  | 1.77     | 0.89     | 2.00     | 2.36     | 0.71     | 0.98     | 2.66     | 1.71     | 2.45     | 1.44     | 2.00     | 1.57     | 1.45     | 1.08     | 1.64     | 3.35     | 1.16     | 1.44     | 3.14     | 0.79     | 2.56     |
| <b>GH51</b>  | 0.39     | 0.34     | 0.51     | 0.44     | 0.16     | 0.50     | 0.51     | 0.34     | 0.59     | 0.64     | 0.36     | 0.40     | 0.42     | 0.46     | 0.34     | 0.47     | 0.28     | 0.43     | 0.66     | 0.32     | 0.54     |
| <b>GT35</b>  | 0.41     | 0.94     | 0.71     | 0.50     | 0.59     | 0.50     | 0.58     | 0.72     | 0.45     | 0.87     | 0.33     | 0.47     | 0.57     | 0.53     | 0.77     | 0.42     | 0.63     | 0.54     | 0.66     | 0.89     | 0.65     |

| CAZY_group | CN-AD-43 | CN-AD-44 | CN-AD-45 | CN-AD-46 | CN-AD-47 | CN-AD-48 | CN-AD-49 | CN-AD-50 | CN-AD-51 | CN-AD-52 | CN-AD-53 | CN-AD-54 | CN-AD-55 | CN-AD-56 | CN-AD-57 | CN-AD-58 | CN-AD-59 | CN-AD-60 | CN-AD-61 | CN-AD-62 | CN-AD-63 |
|------------|----------|----------|----------|----------|----------|----------|----------|----------|----------|----------|----------|----------|----------|----------|----------|----------|----------|----------|----------|----------|----------|
| GT25       | 0.04     | 0.00     | 0.00     | 0.00     | 0.00     | 0.00     | 0.00     | 0.00     | 0.00     | 0.00     | 0.00     | 0.00     | 0.01     | 0.00     | 0.00     | 0.00     | 0.00     | 0.00     | 0.02     | 0.00     | 0.00     |
| GT2        | 2.99     | 3.08     | 3.60     | 3.90     | 2.80     | 2.84     | 3.79     | 3.48     | 3.64     | 2.89     | 2.69     | 2.68     | 2.83     | 2.99     | 3.22     | 3.80     | 2.51     | 3.33     | 4.43     | 2.56     | 3.44     |
| GT51       | 0.79     | 0.74     | 0.94     | 0.85     | 0.55     | 0.75     | 0.84     | 0.56     | 0.83     | 0.75     | 0.74     | 0.67     | 0.75     | 0.69     | 0.53     | 0.73     | 0.43     | 0.74     | 0.70     | 0.68     | 0.74     |
| GH107      | 0.00     | 0.00     | 0.00     | 0.00     | 0.00     | 0.00     | 0.00     | 0.00     | 0.00     | 0.00     | 0.00     | 0.00     | 0.00     | 0.00     | 0.00     | 0.00     | 0.00     | 0.00     | 0.00     | 0.00     | 0.00     |
| GH7        | 0.00     | 0.00     | 0.00     | 0.00     | 0.00     | 0.00     | 0.00     | 0.00     | 0.00     | 0.00     | 0.00     | 0.00     | 0.00     | 0.00     | 0.00     | 0.00     | 0.00     | 0.00     | 0.00     | 0.00     | 0.00     |
| GT7        | 0.00     | 0.00     | 0.00     | 0.00     | 0.00     | 0.00     | 0.00     | 0.00     | 0.00     | 0.00     | 0.00     | 0.00     | 0.00     | 0.00     | 0.00     | 0.00     | 0.00     | 0.00     | 0.00     | 0.00     | 0.00     |
| GT36       | 0.00     | 0.00     | 0.00     | 0.00     | 0.00     | 0.00     | 0.00     | 0.00     | 0.00     | 0.00     | 0.00     | 0.00     | 0.00     | 0.00     | 0.00     | 0.00     | 0.00     | 0.00     | 0.00     | 0.00     | 0.00     |
| PL7        | 0.00     | 0.00     | 0.00     | 0.00     | 0.00     | 0.00     | 0.00     | 0.00     | 0.00     | 0.00     | 0.00     | 0.00     | 0.00     | 0.00     | 0.00     | 0.00     | 0.00     | 0.00     | 0.00     | 0.00     | 0.00     |
| GH110      | 0.20     | 0.03     | 0.13     | 0.02     | 0.12     | 0.17     | 0.24     | 0.02     | 0.10     | 0.03     | 0.07     | 0.09     | 0.14     | 0.12     | 0.11     | 0.24     | 0.04     | 0.11     | 0.22     | 0.08     | 0.12     |
| GT21       | 0.00     | 0.00     | 0.00     | 0.00     | 0.00     | 0.00     | 0.00     | 0.00     | 0.00     | 0.00     | 0.00     | 0.00     | 0.00     | 0.00     | 0.00     | 0.00     | 0.00     | 0.00     | 0.00     | 0.00     | 0.00     |
| GH62       | 0.00     | 0.00     | 0.00     | 0.00     | 0.00     | 0.00     | 0.00     | 0.00     | 0.00     | 0.00     | 0.00     | 0.00     | 0.00     | 0.00     | 0.00     | 0.00     | 0.00     | 0.00     | 0.00     | 0.00     | 0.00     |
| GH125      | 0.17     | 0.03     | 0.15     | 0.21     | 0.00     | 0.17     | 0.19     | 0.12     | 0.15     | 0.00     | 0.15     | 0.16     | 0.19     | 0.04     | 0.17     | 0.07     | 0.12     | 0.18     | 0.15     | 0.05     | 0.15     |
| GH117      | 0.07     | 0.00     | 0.13     | 0.11     | 0.08     | 0.13     | 0.11     | 0.10     | 0.10     | 0.00     | 0.13     | 0.09     | 0.08     | 0.02     | 0.07     | 0.07     | 0.06     | 0.06     | 0.10     | 0.03     | 0.08     |
| GH68       | 0.00     | 0.02     | 0.00     | 0.00     | 0.00     | 0.04     | 0.00     | 0.00     | 0.00     | 0.00     | 0.00     | 0.00     | 0.00     | 0.00     | 0.00     | 0.00     | 0.00     | 0.00     | 0.00     | 0.00     | 0.00     |
| GH85       | 0.00     | 0.00     | 0.05     | 0.00     | 0.00     | 0.00     | 0.00     | 0.02     | 0.00     | 0.00     | 0.00     | 0.00     | 0.01     | 0.00     | 0.00     | 0.00     | 0.08     | 0.04     | 0.00     | 0.00     | 0.00     |
| GH92       | 1.83     | 0.30     | 1.47     | 2.27     | 0.71     | 0.90     | 2.08     | 1.19     | 1.97     | 0.26     | 1.67     | 1.48     | 1.73     | 0.41     | 1.49     | 1.79     | 0.73     | 1.04     | 2.44     | 0.37     | 1.62     |
| GH40       | 0.00     | 0.00     | 0.00     | 0.00     | 0.00     | 0.00     | 0.00     | 0.00     | 0.00     | 0.00     | 0.00     | 0.00     | 0.00     | 0.00     | 0.00     | 0.00     | 0.00     | 0.00     | 0.00     | 0.00     | 0.00     |
| GT49       | 0.00     | 0.00     | 0.00     | 0.00     | 0.00     | 0.00     | 0.00     | 0.00     | 0.00     | 0.00     | 0.00     | 0.00     | 0.00     | 0.00     | 0.00     | 0.00     | 0.00     | 0.00     | 0.00     | 0.00     | 0.00     |
| GH112      | 0.07     | 0.23     | 0.20     | 0.02     | 0.08     | 0.08     | 0.04     | 0.12     | 0.04     | 0.35     | 0.04     | 0.10     | 0.08     | 0.11     | 0.06     | 0.02     | 0.32     | 0.09     | 0.17     | 0.15     | 0.08     |
| GT67       | 0.00     | 0.00     | 0.00     | 0.00     | 0.00     | 0.00     | 0.00     | 0.00     | 0.00     | 0.00     | 0.00     | 0.00     | 0.00     | 0.00     | 0.00     | 0.00     | 0.00     | 0.00     | 0.00     | 0.00     | 0.00     |
| CE8        | 0.13     | 0.16     | 0.15     | 0.21     | 0.32     | 0.04     | 0.32     | 0.14     | 0.20     | 0.09     | 0.31     | 0.16     | 0.14     | 0.18     | 0.20     | 0.19     | 0.16     | 0.23     | 0.26     | 0.15     | 0.19     |
| GT86       | 0.00     | 0.00     | 0.00     | 0.00     | 0.00     | 0.00     | 0.00     | 0.00     | 0.00     | 0.00     | 0.00     | 0.00     | 0.00     | 0.00     | 0.00     | 0.00     | 0.00     | 0.00     | 0.00     | 0.00     | 0.00     |
| GH101      | 0.04     | 0.03     | 0.05     | 0.00     | 0.00     | 0.00     | 0.02     | 0.02     | 0.00     | 0.14     | 0.00     | 0.00     | 0.00     | 0.00     | 0.00     | 0.00     | 0.04     | 0.01     | 0.00     | 0.00     | 0.00     |
| GH81       | 0.00     | 0.00     | 0.00     | 0.00     | 0.00     | 0.00     | 0.04     | 0.00     | 0.00     | 0.00     | 0.00     | 0.00     | 0.00     | 0.02     | 0.02     | 0.00     | 0.00     | 0.00     | 0.00     | 0.00     | 0.00     |
| GT93       | 0.00     | 0.00     | 0.00     | 0.00     | 0.00     | 0.00     | 0.00     | 0.00     | 0.00     | 0.00     | 0.00     | 0.00     | 0.00     | 0.00     | 0.00     | 0.00     | 0.00     | 0.00     | 0.00     | 0.00     | 0.00     |
| GT63       | 0.00     | 0.00     | 0.00     | 0.00     | 0.00     | 0.00     | 0.00     | 0.00     | 0.00     | 0.00     | 0.00     | 0.00     | 0.00     | 0.00     | 0.00     | 0.00     | 0.00     | 0.00     | 0.00     | 0.00     | 0.00     |
| CE11       | 0.13     | 0.09     | 0.21     | 0.11     | 0.08     | 0.13     | 0.24     | 0.14     | 0.29     | 0.12     | 0.15     | 0.16     | 0.17     | 0.32     | 0.23     | 0.14     | 0.08     | 0.23     | 0.19     | 0.13     | 0.18     |
| GT19       | 0.15     | 0.08     | 0.15     | 0.18     | 0.12     | 0.10     | 0.15     | 0.06     | 0.14     | 0.14     | 0.09     | 0.12     | 0.15     | 0.16     | 0.07     | 0.12     | 0.04     | 0.13     | 0.19     | 0.03     | 0.09     |
| GT33       | 0.00     | 0.00     | 0.00     | 0.00     | 0.00     | 0.00     | 0.00     | 0.00     | 0.00     | 0.00     | 0.00     | 0.00     | 0.00     | 0.00     | 0.00     | 0.00     | 0.00     | 0.00     | 0.00     | 0.00     | 0.00     |
| GH21       | 0.00     | 0.00     | 0.00     | 0.00     | 0.00     | 0.00     | 0.00     | 0.00     | 0.00     | 0.00     | 0.00     | 0.00     | 0.00     | 0.00     | 0.00     | 0.00     | 0.00     | 0.00     | 0.00     | 0.00     | 0.00     |
| GT68       | 0.00     | 0.00     | 0.00     | 0.00     | 0.00     | 0.00     | 0.00     | 0.00     | 0.00     | 0.00     | 0.00     | 0.00     | 0.00     | 0.00     | 0.00     | 0.00     | 0.00     | 0.00     | 0.00     | 0.00     | 0.00     |
| GH89       | 0.41     | 0.05     | 0.25     | 0.30     | 0.20     | 0.06     | 0.21     | 0.22     | 0.25     | 0.17     | 0.34     | 0.24     | 0.24     | 0.09     | 0.24     | 0.40     | 0.16     | 0.15     | 0.39     | 0.10     | 0.21     |
| GT82       | 0.00     | 0.00     | 0.00     | 0.00     | 0.00     | 0.00     | 0.00     | 0.00     | 0.00     | 0.00     | 0.00     | 0.00     | 0.00     | 0.00     | 0.00     | 0.00     | 0.00     | 0.00     | 0.02     | 0.00     | 0.00     |
| GH30       | 0.33     | 0.05     | 0.13     | 0.39     | 0.12     | 0.06     | 0.24     | 0.16     | 0.25     | 0.03     | 0.16     | 0.26     | 0.14     | 0.14     | 0.23     | 0.26     | 0.16     | 0.18     | 0.44     | 0.06     | 0.33     |
| GH20       | 1.29     | 0.41     | 1.21     | 1.10     | 1.14     | 0.65     | 1.31     | 0.70     | 1.30     | 0.29     | 0.98     | 1.12     | 1.18     | 0.51     | 1.16     | 1.25     | 0.45     | 0.84     | 1.40     | 0.31     | 0.87     |
| GH52       | 0.00     | 0.00     | 0.00     | 0.00     | 0.00     | 0.00     | 0.00     | 0.00     | 0.00     | 0.00     | 0.00     | 0.00     | 0.00     | 0.00     | 0.00     | 0.00     | 0.00     | 0.00     | 0.00     | 0.00     | 0.00     |
| GT84       | 0.00     | 0.00     | 0.00     | 0.00     | 0.00     | 0.02     | 0.00     | 0.00     | 0.00     | 0.00     | 0.00     | 0.00     | 0.00     | 0.00     | 0.01     | 0.05     | 0.00     | 0.00     | 0.00     | 0.00     | 0.00     |
| GT15       | 0.00     | 0.00     | 0.00     | 0.00     | 0.00     | 0.00     | 0.00     | 0.00     | 0.00     | 0.00     | 0.00     | 0.00     | 0.00     | 0.00     | 0.00     | 0.00     | 0.00     | 0.00     | 0.00     | 0.00     | 0.00     |
| GH93       | 0.02     | 0.00     | 0.00     | 0.00     | 0.00     | 0.00     | 0.02     | 0.00     | 0.00     | 0.00     | 0.02     | 0.02     | 0.01     | 0.00     | 0.00     | 0.00     | 0.00     | 0.01     | 0.03     | 0.00     | 0.01     |
| PL16       | 0.00     | 0.00     | 0.00     | 0.00     | 0.00     | 0.00     | 0.00     | 0.00     | 0.00     | 0.00     | 0.00     | 0.00     | 0.00     | 0.00     | 0.00     | 0.00     | 0.00     | 0.00     | 0.00     | 0.00     | 0.00     |
| GH26       | 0.02     | 0.03     | 0.07     | 0.14     | 0.00     | 0.04     | 0.02     | 0.20     | 0.18     | 0.03     | 0.07     | 0.00     | 0.02     | 0.07     | 0.11     | 0.07     | 0.04     | 0.05     | 0.14     | 0.02     | 0.20     |
| GT75       | 0.00     | 0.00     | 0.00     | 0.00     | 0.00     | 0.00     | 0.00     | 0.00     | 0.00     | 0.00     | 0.00     | 0.00     | 0.00     | 0.00     | 0.00     | 0.00     | 0.00     | 0.00     | 0.00     | 0.00     | 0.00     |
| GH53       | 0.00     | 0.06     | 0.08     | 0.05     | 0.08     | 0.02     | 0.06     | 0.02     | 0.06     | 0.06     | 0.05     | 0.00     | 0.01     | 0.11     | 0.01     | 0.07     | 0.12     | 0.16     | 0.22     | 0.08     | 0.11     |
| GT88       | 0.00     | 0.00     | 0.00     | 0.00     | 0.00     | 0.00     | 0.00     | 0.00     | 0.00     | 0.00     | 0.00     | 0.00     | 0.00     | 0.00     | 0.00     | 0.00     | 0.00     | 0.00     | 0.00     | 0.00     | 0.00     |
| GT24       | 0.00     | 0.00     | 0.00     | 0.00     | 0.00     | 0.00     | 0.00     | 0.00     | 0.00     | 0.00     | 0.00     | 0.00     | 0.00     | 0.00     | 0.00     | 0.00     | 0.00     | 0.00     | 0.00     | 0.00     | 0.00     |
| GT81       | 0.00     | 0.00     | 0.00     | 0.00     | 0.00     | 0.00     | 0.00     | 0.00     | 0.00     | 0.00     | 0.00     | 0.00     | 0.00     | 0.00     | 0.00     | 0.00     | 0.00     | 0.00     | 0.00     | 0.00     | 0.00     |
| GH4        | 0.24     | 0.27     | 0.02     | 0.18     | 0.00     | 0.29     | 0.09     | 0.04     | 0.09     | 0.38     | 0.20     | 0.16     | 0.17     | 0.07     | 0.11     | 0.05     | 0.08     | 0.19     | 0.10     | 0.19     | 0.07     |
| GT78       | 0.00     | 0.00     | 0.00     | 0.00     | 0.00     | 0.00     | 0.00     | 0.00     | 0.00     | 0.00     | 0.00     | 0.00     | 0.00     | 0.00     | 0.00     | 0.00     | 0.00     | 0.00     | 0.00     | 0.00     | 0.00     |
| GH8        | 0.02     | 0.02     | 0.02     | 0.09     | 0.00     | 0.00     | 0.00     | 0.04     | 0.08     | 0.03     | 0.05     | 0.00     | 0.00     | 0.02     | 0.04     | 0.09     | 0.06     | 0.06     | 0.10     | 0.02     | 0.07     |
| GH70       | 0.00     | 0.00     | 0.00     | 0.00     | 0.00     | 0.10     | 0.00     | 0.00     | 0.01     | 0.00     | 0.00     | 0.00     | 0.00     | 0.00     | 0.00     | 0.00     | 0.00     | 0.00     | 0.00     | 0.00     | 0.00     |
| GH122      | 0.00     | 0.00     | 0.00     | 0.00     | 0.00     | 0.00     | 0.00     | 0.00     | 0.00     | 0.00     | 0.00     | 0.00     | 0.00     | 0.00     | 0.00     | 0.00     | 0.00     | 0.00     | 0.00     | 0.00     | 0.00     |
| GH74       | 0.00     | 0.00     | 0.02     | 0.00     | 0.00     | 0.04     | 0.00     | 0.04     | 0.03     | 0.03     | 0.00     | 0.00     | 0.00     | 0.00     | 0.02     | 0.00     | 0.02     | 0.03     | 0.02     | 0.02     | 0.07     |
| GT41       | 0.00     | 0.03     | 0.00     | 0.00     | 0.04     | 0.00     | 0.00     | 0.00     | 0.00     | 0.00     | 0.00     | 0.00     | 0.00     | 0.00     | 0.00     | 0.00     | 0.01     | 0.00     | 0.00     | 0.00     | 0.00     |

| CAZY_group | CN-AD-43 | CN-AD-44 | CN-AD-45 | CN-AD-46 | CN-AD-47 | CN-AD-48 | CN-AD-49 | CN-AD-50 | CN-AD-51 | CN-AD-52 | CN-AD-53 | CN-AD-54 | CN-AD-55 | CN-AD-56 | CN-AD-57 | CN-AD-58 | CN-AD-59 | CN-AD-60 | CN-AD-61 | CN-AD-62 | CN-AD-63 |
|------------|----------|----------|----------|----------|----------|----------|----------|----------|----------|----------|----------|----------|----------|----------|----------|----------|----------|----------|----------|----------|----------|
| PL1        | 0.41     | 0.14     | 0.25     | 0.28     | 0.20     | 0.00     | 0.41     | 0.32     | 0.34     | 0.00     | 0.42     | 0.22     | 0.30     | 0.16     | 0.21     | 0.33     | 0.16     | 0.16     | 0.48     | 0.13     | 0.35     |
| GH15       | 0.02     | 0.02     | 0.03     | 0.05     | 0.00     | 0.06     | 0.06     | 0.00     | 0.04     | 0.00     | 0.05     | 0.02     | 0.07     | 0.00     | 0.08     | 0.09     | 0.02     | 0.01     | 0.03     | 0.03     | 0.04     |
| GH32       | 0.46     | 0.58     | 0.48     | 0.41     | 0.36     | 0.65     | 0.49     | 0.38     | 0.32     | 0.72     | 0.27     | 0.43     | 0.24     | 0.39     | 0.29     | 0.28     | 0.30     | 0.31     | 0.55     | 0.32     | 0.30     |
| GH44       | 0.00     | 0.00     | 0.00     | 0.00     | 0.00     | 0.00     | 0.00     | 0.04     | 0.00     | 0.00     | 0.00     | 0.00     | 0.00     | 0.00     | 0.01     | 0.00     | 0.00     | 0.00     | 0.00     | 0.03     | 0.01     |
| GT6        | 0.02     | 0.00     | 0.00     | 0.02     | 0.00     | 0.00     | 0.00     | 0.00     | 0.00     | 0.00     | 0.00     | 0.00     | 0.00     | 0.00     | 0.00     | 0.00     | 0.04     | 0.00     | 0.00     | 0.00     | 0.00     |
| GH13       | 1.24     | 3.49     | 2.43     | 1.74     | 2.45     | 1.84     | 1.61     | 3.06     | 1.69     | 3.61     | 1.47     | 1.48     | 1.61     | 2.23     | 2.26     | 2.17     | 1.97     | 2.06     | 2.32     | 2.72     | 2.06     |
| GT80       | 0.02     | 0.02     | 0.03     | 0.02     | 0.00     | 0.00     | 0.00     | 0.00     | 0.03     | 0.00     | 0.02     | 0.02     | 0.01     | 0.04     | 0.02     | 0.05     | 0.00     | 0.01     | 0.00     | 0.00     | 0.00     |
| GH71       | 0.00     | 0.00     | 0.00     | 0.00     | 0.00     | 0.00     | 0.00     | 0.00     | 0.00     | 0.00     | 0.00     | 0.00     | 0.00     | 0.00     | 0.00     | 0.00     | 0.00     | 0.00     | 0.00     | 0.00     | 0.00     |
| GH63       | 0.11     | 0.02     | 0.02     | 0.16     | 0.08     | 0.10     | 0.11     | 0.00     | 0.09     | 0.09     | 0.09     | 0.02     | 0.07     | 0.09     | 0.04     | 0.17     | 0.02     | 0.11     | 0.14     | 0.00     | 0.07     |
| PL21       | 0.00     | 0.00     | 0.05     | 0.00     | 0.08     | 0.00     | 0.00     | 0.06     | 0.00     | 0.00     | 0.04     | 0.03     | 0.02     | 0.00     | 0.02     | 0.00     | 0.06     | 0.03     | 0.00     | 0.03     | 0.02     |
| GH65       | 0.07     | 0.11     | 0.12     | 0.16     | 0.04     | 0.15     | 0.06     | 0.16     | 0.10     | 0.12     | 0.13     | 0.09     | 0.08     | 0.04     | 0.10     | 0.14     | 0.16     | 0.13     | 0.20     | 0.03     | 0.09     |
| CE4        | 0.20     | 0.70     | 0.38     | 0.46     | 0.20     | 0.48     | 0.45     | 0.30     | 0.42     | 0.64     | 0.33     | 0.41     | 0.34     | 0.53     | 0.43     | 0.50     | 0.39     | 0.50     | 0.46     | 0.34     | 0.50     |
| CE14       | 0.02     | 0.00     | 0.00     | 0.00     | 0.00     | 0.00     | 0.04     | 0.00     | 0.04     | 0.00     | 0.00     | 0.00     | 0.03     | 0.02     | 0.00     | 0.00     | 0.02     | 0.03     | 0.03     | 0.00     | 0.00     |
| GH115      | 0.20     | 0.05     | 0.18     | 0.37     | 0.12     | 0.06     | 0.34     | 0.08     | 0.39     | 0.14     | 0.20     | 0.19     | 0.19     | 0.12     | 0.26     | 0.35     | 0.16     | 0.09     | 0.55     | 0.08     | 0.35     |
| GH104      | 0.00     | 0.00     | 0.00     | 0.00     | 0.00     | 0.00     | 0.00     | 0.00     | 0.00     | 0.00     | 0.00     | 0.05     | 0.00     | 0.00     | 0.00     | 0.00     | 0.00     | 0.00     | 0.00     | 0.00     | 0.00     |
| GH111      | 0.00     | 0.00     | 0.00     | 0.00     | 0.00     | 0.00     | 0.00     | 0.00     | 0.00     | 0.00     | 0.00     | 0.00     | 0.00     | 0.00     | 0.00     | 0.00     | 0.00     | 0.00     | 0.00     | 0.00     | 0.00     |
| GH95       | 0.63     | 0.28     | 0.76     | 0.50     | 0.36     | 0.33     | 0.66     | 0.42     | 0.69     | 0.26     | 0.53     | 0.55     | 0.49     | 0.48     | 0.53     | 0.61     | 0.32     | 0.36     | 1.02     | 0.32     | 0.78     |
| GT70       | 0.00     | 0.00     | 0.00     | 0.00     | 0.00     | 0.00     | 0.00     | 0.00     | 0.00     | 0.00     | 0.00     | 0.00     | 0.00     | 0.00     | 0.00     | 0.00     | 0.00     | 0.00     | 0.00     | 0.00     | 0.00     |
| CE10       | 0.35     | 0.17     | 0.23     | 0.28     | 0.12     | 0.08     | 0.26     | 0.12     | 0.15     | 0.03     | 0.18     | 0.16     | 0.18     | 0.14     | 0.08     | 0.21     | 0.10     | 0.13     | 0.19     | 0.06     | 0.09     |
| GH10       | 0.04     | 0.02     | 0.12     | 0.14     | 0.00     | 0.02     | 0.09     | 0.06     | 0.19     | 0.12     | 0.15     | 0.07     | 0.02     | 0.05     | 0.10     | 0.17     | 0.06     | 0.05     | 0.10     | 0.05     | 0.09     |
| GH130      | 0.39     | 0.16     | 0.43     | 0.32     | 0.08     | 0.10     | 0.19     | 0.16     | 0.37     | 0.06     | 0.15     | 0.21     | 0.24     | 0.16     | 0.32     | 0.19     | 0.26     | 0.25     | 0.39     | 0.06     | 0.27     |
| PL20       | 0.00     | 0.00     | 0.00     | 0.00     | 0.00     | 0.00     | 0.00     | 0.00     | 0.00     | 0.00     | 0.00     | 0.00     | 0.00     | 0.00     | 0.00     | 0.00     | 0.00     | 0.00     | 0.00     | 0.00     | 0.00     |
| GH69       | 0.00     | 0.00     | 0.00     | 0.00     | 0.00     | 0.00     | 0.00     | 0.00     | 0.00     | 0.00     | 0.00     | 0.00     | 0.00     | 0.00     | 0.00     | 0.00     | 0.00     | 0.00     | 0.00     | 0.00     | 0.00     |
| PL2        | 0.00     | 0.00     | 0.00     | 0.00     | 0.00     | 0.00     | 0.00     | 0.00     | 0.00     | 0.00     | 0.00     | 0.00     | 0.00     | 0.00     | 0.00     | 0.00     | 0.00     | 0.00     | 0.02     | 0.00     | 0.00     |
| GH49       | 0.00     | 0.00     | 0.00     | 0.00     | 0.00     | 0.00     | 0.00     | 0.00     | 0.00     | 0.00     | 0.00     | 0.00     | 0.00     | 0.00     | 0.00     | 0.00     | 0.00     | 0.00     | 0.00     | 0.00     | 0.00     |
| GH25       | 0.22     | 0.44     | 0.30     | 0.30     | 0.36     | 0.42     | 0.32     | 0.34     | 0.18     | 0.66     | 0.29     | 0.14     | 0.22     | 0.25     | 0.30     | 0.12     | 0.24     | 0.35     | 0.20     | 0.32     | 0.21     |
| GH59       | 0.00     | 0.00     | 0.00     | 0.00     | 0.00     | 0.00     | 0.00     | 0.02     | 0.01     | 0.00     | 0.00     | 0.00     | 0.00     | 0.00     | 0.02     | 0.00     | 0.00     | 0.00     | 0.00     | 0.03     | 0.01     |
| GH35       | 0.50     | 0.13     | 0.38     | 0.32     | 0.32     | 0.27     | 0.45     | 0.24     | 0.45     | 0.14     | 0.45     | 0.31     | 0.34     | 0.14     | 0.24     | 0.31     | 0.24     | 0.30     | 0.44     | 0.16     | 0.50     |
| GT39       | 0.00     | 0.00     | 0.00     | 0.00     | 0.00     | 0.00     | 0.00     | 0.00     | 0.00     | 0.00     | 0.00     | 0.00     | 0.00     | 0.00     | 0.00     | 0.00     | 0.00     | 0.00     | 0.00     | 0.00     | 0.00     |
| GT57       | 0.00     | 0.00     | 0.00     | 0.00     | 0.00     | 0.00     | 0.00     | 0.00     | 0.00     | 0.00     | 0.00     | 0.00     | 0.00     | 0.00     | 0.00     | 0.00     | 0.00     | 0.00     | 0.00     | 0.00     | 0.00     |
| GH129      | 0.00     | 0.06     | 0.00     | 0.00     | 0.00     | 0.04     | 0.00     | 0.04     | 0.00     | 0.00     | 0.00     | 0.00     | 0.00     | 0.00     | 0.01     | 0.00     | 0.00     | 0.00     | 0.02     | 0.02     | 0.00     |
| GT22       | 0.00     | 0.00     | 0.00     | 0.00     | 0.00     | 0.00     | 0.00     | 0.00     | 0.00     | 0.00     | 0.00     | 0.00     | 0.00     | 0.00     | 0.00     | 0.00     | 0.00     | 0.00     | 0.00     | 0.00     | 0.00     |
| PL12       | 0.04     | 0.00     | 0.10     | 0.07     | 0.08     | 0.02     | 0.09     | 0.16     | 0.13     | 0.00     | 0.04     | 0.19     | 0.07     | 0.00     | 0.14     | 0.12     | 0.06     | 0.04     | 0.17     | 0.03     | 0.08     |
| PL18       | 0.00     | 0.00     | 0.00     | 0.00     | 0.00     | 0.00     | 0.00     | 0.00     | 0.00     | 0.00     | 0.00     | 0.00     | 0.00     | 0.00     | 0.00     | 0.00     | 0.00     | 0.00     | 0.00     | 0.00     | 0.00     |
| GT92       | 0.00     | 0.00     | 0.00     | 0.00     | 0.00     | 0.00     | 0.00     | 0.00     | 0.00     | 0.00     | 0.00     | 0.00     | 0.00     | 0.00     | 0.00     | 0.00     | 0.00     | 0.00     | 0.00     | 0.00     | 0.00     |
| GT44       | 0.00     | 0.00     | 0.00     | 0.00     | 0.00     | 0.00     | 0.00     | 0.00     | 0.00     | 0.00     | 0.00     | 0.00     | 0.00     | 0.00     | 0.00     | 0.00     | 0.00     | 0.00     | 0.00     | 0.00     | 0.00     |
| GT29       | 0.00     | 0.00     | 0.00     | 0.00     | 0.00     | 0.00     | 0.00     | 0.00     | 0.00     | 0.00     | 0.00     | 0.00     | 0.00     | 0.00     | 0.00     | 0.00     | 0.00     | 0.00     | 0.00     | 0.00     | 0.00     |
| GT13       | 0.00     | 0.00     | 0.00     | 0.00     | 0.00     | 0.00     | 0.00     | 0.00     | 0.00     | 0.00     | 0.00     | 0.00     | 0.00     | 0.00     | 0.00     | 0.00     | 0.00     | 0.00     | 0.00     | 0.00     | 0.00     |
| GT52       | 0.00     | 0.00     | 0.00     | 0.00     | 0.00     | 0.00     | 0.00     | 0.00     | 0.00     | 0.00     | 0.00     | 0.00     | 0.00     | 0.00     | 0.00     | 0.00     | 0.00     | 0.00     | 0.00     | 0.00     | 0.00     |
| GT64       | 0.00     | 0.00     | 0.00     | 0.00     | 0.00     | 0.00     | 0.00     | 0.00     | 0.00     | 0.00     | 0.00     | 0.00     | 0.00     | 0.00     | 0.00     | 0.00     | 0.00     | 0.00     | 0.00     | 0.00     | 0.00     |
| GT85       | 0.00     | 0.00     | 0.00     | 0.00     | 0.00     | 0.00     | 0.00     | 0.00     | 0.00     | 0.00     | 0.00     | 0.00     | 0.00     | 0.00     | 0.00     | 0.00     | 0.00     | 0.00     | 0.00     | 0.00     | 0.00     |
| GT16       | 0.00     | 0.00     | 0.00     | 0.00     | 0.00     | 0.00     | 0.00     | 0.00     | 0.00     | 0.00     | 0.00     | 0.00     | 0.00     | 0.00     | 0.00     | 0.00     | 0.00     | 0.00     | 0.00     | 0.00     | 0.00     |
| GH56       | 0.00     | 0.00     | 0.00     | 0.00     | 0.00     | 0.00     | 0.00     | 0.00     | 0.00     | 0.00     | 0.00     | 0.00     | 0.00     | 0.00     | 0.00     | 0.00     | 0.00     | 0.00     | 0.00     | 0.00     | 0.00     |
| GT60       | 0.00     | 0.00     | 0.00     | 0.00     | 0.00     | 0.00     | 0.00     | 0.00     | 0.00     | 0.00     | 0.00     | 0.00     | 0.00     | 0.00     | 0.00     | 0.00     | 0.00     | 0.00     | 0.00     | 0.00     | 0.00     |
| GH41       | 0.00     | 0.00     | 0.00     | 0.00     | 0.00     | 0.00     | 0.00     | 0.00     | 0.00     | 0.00     | 0.00     | 0.00     | 0.00     | 0.00     | 0.00     | 0.00     | 0.00     | 0.00     | 0.00     | 0.00     | 0.00     |
| CE7        | 0.13     | 0.03     | 0.10     | 0.23     | 0.12     | 0.08     | 0.11     | 0.10     | 0.11     | 0.03     | 0.13     | 0.19     | 0.08     | 0.05     | 0.07     | 0.05     | 0.10     | 0.05     | 0.17     | 0.02     | 0.11     |
| GH39       | 0.02     | 0.06     | 0.03     | 0.00     | 0.00     | 0.00     | 0.02     | 0.00     | 0.08     | 0.00     | 0.02     | 0.02     | 0.00     | 0.09     | 0.02     | 0.02     | 0.06     | 0.03     | 0.05     | 0.02     | 0.05     |
| GT30       | 0.24     | 0.08     | 0.28     | 0.25     | 0.28     | 0.17     | 0.41     | 0.18     | 0.33     | 0.23     | 0.27     | 0.43     | 0.28     | 0.30     | 0.25     | 0.38     | 0.22     | 0.24     | 0.34     | 0.13     | 0.22     |
| PL15       | 0.09     | 0.00     | 0.12     | 0.16     | 0.08     | 0.00     | 0.13     | 0.18     | 0.05     | 0.00     | 0.11     | 0.24     | 0.10     | 0.00     | 0.06     | 0.00     | 0.06     | 0.04     | 0.15     | 0.03     | 0.11     |
| GH102      | 0.02     | 0.06     | 0.02     | 0.05     | 0.04     | 0.04     | 0.00     | 0.02     | 0.03     | 0.09     | 0.02     | 0.03     | 0.01     | 0.05     | 0.04     | 0.00     | 0.04     | 0.04     | 0.02     | 0.08     | 0.01     |

| CAZY_group | CN-AD-64 | CN-AD-65 | CN-AD-66 |
|------------|----------|----------|----------|
| GH29       | 0.87     | 0.67     | 0.41     |
| PL4        | 0.00     | 0.00     | 0.00     |
| GH23       | 0.90     | 1.13     | 0.71     |
| CE6        | 0.00     | 0.04     | 0.01     |
| GH72       | 0.03     | 0.08     | 0.06     |
| GH114      | 0.00     | 0.00     | 0.00     |
| GH78       | 0.79     | 0.83     | 0.72     |
| PL19       | 0.00     | 0.00     | 0.00     |
| GT27       | 0.00     | 0.00     | 0.00     |
| GH5        | 0.21     | 0.16     | 0.13     |
| GT40       | 0.00     | 0.00     | 0.00     |
| CE13       | 0.00     | 0.00     | 0.00     |
| GT37       | 0.00     | 0.00     | 0.00     |
| GH33       | 0.24     | 0.18     | 0.18     |
| GT65       | 0.00     | 0.00     | 0.00     |
| GH86       | 0.00     | 0.00     | 0.00     |
| GH123      | 0.08     | 0.08     | 0.09     |
| GH96       | 0.00     | 0.00     | 0.00     |
| GH14       | 0.00     | 0.00     | 0.00     |
| CE3        | 0.00     | 0.00     | 0.00     |
| PL10       | 0.11     | 0.14     | 0.07     |
| GT48       | 0.00     | 0.00     | 0.00     |
| PL6        | 0.00     | 0.00     | 0.00     |
| GT83       | 0.05     | 0.22     | 0.08     |
| GH126      | 0.00     | 0.00     | 0.00     |
| GH9        | 0.05     | 0.18     | 0.08     |
| GH75       | 0.00     | 0.00     | 0.00     |
| GT71       | 0.00     | 0.00     | 0.00     |
| GH46       | 0.00     | 0.00     | 0.00     |
| GT61       | 0.00     | 0.00     | 0.00     |
| GT3        | 0.08     | 0.24     | 0.04     |
| PL3        | 0.00     | 0.00     | 0.00     |
| GH108      | 0.03     | 0.08     | 0.04     |
| GT56       | 0.00     | 0.00     | 0.00     |
| PL11       | 0.08     | 0.16     | 0.09     |
| GH45       | 0.00     | 0.00     | 0.00     |
| GT34       | 0.00     | 0.00     | 0.00     |
| PL14       | 0.00     | 0.00     | 0.00     |
| GH19       | 0.00     | 0.00     | 0.00     |
| GH118      | 0.00     | 0.00     | 0.00     |
| GH82       | 0.00     | 0.00     | 0.00     |
| GH76       | 0.13     | 0.38     | 0.04     |
| GT4        | 1.48     | 2.00     | 1.31     |
| GT87       | 0.00     | 0.00     | 0.00     |
| GH24       | 0.19     | 0.16     | 0.12     |
| GH90       | 0.00     | 0.00     | 0.00     |
| GH57       | 0.11     | 0.16     | 0.05     |
| GH36       | 0.82     | 0.89     | 0.47     |
| GT46       | 0.00     | 0.00     | 0.00     |
| GH66       | 0.05     | 0.08     | 0.04     |
| GH48       | 0.00     | 0.00     | 0.00     |
| GT53       | 0.00     | 0.00     | 0.00     |
| GH60       | 0.00     | 0.00     | 0.00     |

| CAZY_group | CN-AD-64 | CN-AD-65 | CN-AD-66 |
|------------|----------|----------|----------|
| GT31       | 0.00     | 0.00     | 0.00     |
| GH105      | 0.63     | 0.61     | 0.28     |
| GT23       | 0.03     | 0.00     | 0.00     |
| GH11       | 0.00     | 0.00     | 0.00     |
| GT38       | 0.00     | 0.00     | 0.00     |
| GT43       | 0.00     | 0.00     | 0.00     |
| GH99       | 0.00     | 0.02     | 0.00     |
| GH38       | 0.21     | 0.24     | 0.13     |
| GH109      | 0.26     | 0.40     | 0.14     |
| GH2        | 3.49     | 4.28     | 2.30     |
| GT28       | 0.40     | 0.26     | 0.28     |
| GH42       | 0.11     | 0.14     | 0.09     |
| GT58       | 0.00     | 0.00     | 0.00     |
| GH61       | 0.00     | 0.00     | 0.00     |
| GH80       | 0.00     | 0.00     | 0.00     |
| GH98       | 0.00     | 0.02     | 0.00     |
| GH6        | 0.00     | 0.00     | 0.00     |
| GT1        | 0.03     | 0.02     | 0.08     |
| GH28       | 0.69     | 0.93     | 0.42     |
| GT42       | 0.00     | 0.00     | 0.00     |
| GH128      | 0.00     | 0.00     | 0.00     |
| CE12       | 0.13     | 0.06     | 0.08     |
| CE16       | 0.00     | 0.00     | 0.00     |
| GT89       | 0.00     | 0.00     | 0.00     |
| GT11       | 0.08     | 0.04     | 0.02     |
| GT77       | 0.00     | 0.00     | 0.01     |
| GT55       | 0.00     | 0.00     | 0.00     |
| GT18       | 0.00     | 0.00     | 0.00     |
| GH87       | 0.00     | 0.00     | 0.00     |
| PL5        | 0.00     | 0.00     | 0.00     |
| GH22       | 0.00     | 0.00     | 0.00     |
| CE2        | 0.00     | 0.10     | 0.01     |
| GH120      | 0.00     | 0.00     | 0.01     |
| GH73       | 0.40     | 0.48     | 0.36     |
| GT17       | 0.00     | 0.00     | 0.00     |
| GH124      | 0.00     | 0.00     | 0.00     |
| GH54       | 0.00     | 0.00     | 0.00     |
| GH100      | 0.00     | 0.00     | 0.00     |
| GH113      | 0.03     | 0.00     | 0.01     |
| GT5        | 0.32     | 0.36     | 0.25     |
| GH94       | 0.32     | 0.12     | 0.11     |
| GT66       | 0.00     | 0.00     | 0.00     |
| GT94       | 0.00     | 0.00     | 0.00     |
| GH58       | 0.00     | 0.00     | 0.00     |
| GH1        | 0.29     | 0.02     | 0.33     |
| PL22       | 0.00     | 0.00     | 0.00     |
| GT9        | 0.19     | 0.24     | 0.13     |
| GT76       | 0.00     | 0.00     | 0.00     |
| GT32       | 0.13     | 0.00     | 0.07     |
| GT47       | 0.03     | 0.00     | 0.00     |
| GH84       | 0.11     | 0.12     | 0.09     |
| GH83       | 0.00     | 0.00     | 0.00     |
| GT59       | 0.00     | 0.00     | 0.00     |

| CAZY_group | CN-AD-64 | CN-AD-65 | CN-AD-66 |
|------------|----------|----------|----------|
| GH34       | 0.00     | 0.00     | 0.00     |
| GT14       | 0.03     | 0.06     | 0.01     |
| GH47       | 0.00     | 0.00     | 0.00     |
| GH97       | 0.66     | 1.37     | 0.43     |
| GH50       | 0.00     | 0.10     | 0.00     |
| GT26       | 0.16     | 0.10     | 0.15     |
| GH18       | 0.61     | 0.75     | 0.30     |
| GH37       | 0.00     | 0.00     | 0.00     |
| PL13       | 0.03     | 0.10     | 0.01     |
| GH27       | 0.16     | 0.30     | 0.13     |
| GT54       | 0.00     | 0.00     | 0.00     |
| GT91       | 0.00     | 0.00     | 0.00     |
| GT72       | 0.00     | 0.00     | 0.00     |
| GH67       | 0.03     | 0.04     | 0.04     |
| GH12       | 0.00     | 0.00     | 0.00     |
| GH91       | 0.00     | 0.04     | 0.01     |
| GT69       | 0.00     | 0.00     | 0.00     |
| GH106      | 0.26     | 0.32     | 0.11     |
| GT62       | 0.00     | 0.00     | 0.00     |
| GH17       | 0.00     | 0.00     | 0.00     |
| GH88       | 0.08     | 0.48     | 0.18     |
| CE5        | 0.00     | 0.00     | 0.00     |
| GT8        | 0.19     | 0.04     | 0.07     |
| GT50       | 0.00     | 0.00     | 0.00     |
| GT20       | 0.08     | 0.08     | 0.07     |
| PL9        | 0.13     | 0.04     | 0.05     |
| GH55       | 0.03     | 0.04     | 0.00     |
| GH64       | 0.00     | 0.00     | 0.00     |
| GH127      | 0.19     | 0.36     | 0.15     |
| GH103      | 0.00     | 0.00     | 0.00     |
| GH3        | 1.93     | 2.52     | 1.46     |
| GT45       | 0.00     | 0.00     | 0.00     |
| GT74       | 0.00     | 0.00     | 0.00     |
| GT90       | 0.00     | 0.00     | 0.00     |
| GH116      | 0.08     | 0.12     | 0.02     |
| GH31       | 1.14     | 0.99     | 0.70     |
| GT12       | 0.00     | 0.00     | 0.00     |
| CE1        | 0.29     | 0.32     | 0.25     |
| GH121      | 0.00     | 0.00     | 0.00     |
| GH79       | 0.00     | 0.00     | 0.01     |
| GT73       | 0.00     | 0.00     | 0.00     |
| GH77       | 0.56     | 0.36     | 0.37     |
| PL17       | 0.05     | 0.02     | 0.01     |
| PL8        | 0.26     | 0.54     | 0.12     |
| CE9        | 0.16     | 0.34     | 0.32     |
| CE15       | 0.00     | 0.02     | 0.00     |
| GT79       | 0.00     | 0.00     | 0.00     |
| GT10       | 0.00     | 0.02     | 0.01     |
| GH119      | 0.00     | 0.00     | 0.00     |
| GH16       | 0.11     | 0.26     | 0.11     |
| GH43       | 1.75     | 2.40     | 1.02     |
| GH51       | 0.32     | 0.59     | 0.22     |
| GT35       | 0.71     | 0.52     | 0.64     |



| CAZY_group | CN-AD-64 | CN-AD-65 | CN-AD-66 |
|------------|----------|----------|----------|
| GT25       | 0.00     | 0.04     | 0.00     |
| GT2        | 3.31     | 3.69     | 2.84     |
| GT51       | 0.56     | 0.87     | 0.75     |
| GH107      | 0.00     | 0.00     | 0.00     |
| GH7        | 0.00     | 0.00     | 0.00     |
| GT7        | 0.00     | 0.00     | 0.00     |
| GT36       | 0.00     | 0.00     | 0.00     |
| PL7        | 0.00     | 0.00     | 0.01     |
| GH110      | 0.16     | 0.16     | 0.09     |
| GT21       | 0.00     | 0.00     | 0.00     |
| GH62       | 0.00     | 0.00     | 0.00     |
| GH125      | 0.11     | 0.22     | 0.07     |
| GH117      | 0.16     | 0.18     | 0.08     |
| GH68       | 0.00     | 0.00     | 0.02     |
| GH85       | 0.00     | 0.02     | 0.02     |
| GH92       | 1.32     | 2.46     | 0.81     |
| GH40       | 0.00     | 0.00     | 0.00     |
| GT49       | 0.00     | 0.00     | 0.00     |
| GH112      | 0.11     | 0.04     | 0.14     |
| GT67       | 0.00     | 0.00     | 0.00     |
| CE8        | 0.16     | 0.18     | 0.12     |
| GT86       | 0.00     | 0.00     | 0.00     |
| GH101      | 0.00     | 0.00     | 0.02     |
| GH81       | 0.00     | 0.00     | 0.00     |
| GT93       | 0.00     | 0.00     | 0.00     |
| GT63       | 0.00     | 0.00     | 0.00     |
| CE11       | 0.16     | 0.22     | 0.14     |
| GT19       | 0.08     | 0.10     | 0.09     |
| GT33       | 0.00     | 0.00     | 0.00     |
| GH21       | 0.00     | 0.00     | 0.00     |
| GT68       | 0.00     | 0.00     | 0.00     |
| GH89       | 0.26     | 0.40     | 0.08     |
| GT82       | 0.00     | 0.00     | 0.00     |
| GH30       | 0.21     | 0.20     | 0.21     |
| GH20       | 1.06     | 2.16     | 0.69     |
| GH52       | 0.00     | 0.00     | 0.00     |
| GT84       | 0.00     | 0.00     | 0.00     |
| GT15       | 0.00     | 0.00     | 0.00     |
| GH93       | 0.00     | 0.02     | 0.00     |
| PL16       | 0.00     | 0.00     | 0.00     |
| GH26       | 0.08     | 0.02     | 0.02     |
| GT75       | 0.00     | 0.00     | 0.00     |
| GH53       | 0.19     | 0.12     | 0.02     |
| GT88       | 0.00     | 0.00     | 0.00     |
| GT24       | 0.00     | 0.00     | 0.00     |
| GT81       | 0.00     | 0.00     | 0.00     |
| GH4        | 0.11     | 0.04     | 0.07     |
| GT78       | 0.00     | 0.00     | 0.00     |
| GH8        | 0.05     | 0.08     | 0.01     |
| GH70       | 0.00     | 0.00     | 0.15     |
| GH122      | 0.00     | 0.00     | 0.00     |
| GH74       | 0.05     | 0.00     | 0.00     |
| GT41       | 0.00     | 0.00     | 0.00     |

| CAZY_group | CN-AD-64 | CN-AD-65 | CN-AD-66 |
|------------|----------|----------|----------|
| PL1        | 0.26     | 0.36     | 0.07     |
| GH15       | 0.00     | 0.04     | 0.04     |
| GH32       | 0.42     | 0.38     | 0.32     |
| GH44       | 0.00     | 0.00     | 0.00     |
| GT6        | 0.00     | 0.00     | 0.00     |
| GH13       | 2.80     | 2.02     | 1.59     |
| GT80       | 0.00     | 0.00     | 0.00     |
| GH71       | 0.00     | 0.00     | 0.00     |
| GH63       | 0.05     | 0.08     | 0.05     |
| PL21       | 0.00     | 0.04     | 0.02     |
| GH65       | 0.13     | 0.12     | 0.11     |
| CE4        | 0.45     | 0.32     | 0.34     |
| CE14       | 0.00     | 0.00     | 0.00     |
| GH115      | 0.24     | 0.14     | 0.12     |
| GH104      | 0.00     | 0.00     | 0.00     |
| GH111      | 0.00     | 0.00     | 0.00     |
| GH95       | 0.48     | 0.71     | 0.29     |
| GT70       | 0.00     | 0.00     | 0.00     |
| CE10       | 0.13     | 0.18     | 0.14     |
| GH10       | 0.24     | 0.12     | 0.07     |
| GH130      | 0.26     | 0.30     | 0.11     |
| PL20       | 0.00     | 0.00     | 0.00     |
| GH69       | 0.00     | 0.00     | 0.00     |
| PL2        | 0.00     | 0.00     | 0.00     |
| GH49       | 0.00     | 0.00     | 0.00     |
| GH25       | 0.40     | 0.20     | 0.35     |
| GH59       | 0.00     | 0.00     | 0.00     |
| GH35       | 0.29     | 0.38     | 0.27     |
| GT39       | 0.00     | 0.00     | 0.00     |
| GT57       | 0.00     | 0.00     | 0.00     |
| GH129      | 0.00     | 0.00     | 0.00     |
| GT22       | 0.00     | 0.00     | 0.00     |
| PL12       | 0.05     | 0.26     | 0.05     |
| PL18       | 0.00     | 0.00     | 0.00     |
| GT92       | 0.00     | 0.00     | 0.00     |
| GT44       | 0.00     | 0.00     | 0.00     |
| GT29       | 0.00     | 0.00     | 0.00     |
| GT13       | 0.00     | 0.00     | 0.00     |
| GT52       | 0.00     | 0.00     | 0.00     |
| GT64       | 0.00     | 0.00     | 0.00     |
| GT85       | 0.00     | 0.00     | 0.00     |
| GT16       | 0.00     | 0.00     | 0.00     |
| GH56       | 0.00     | 0.00     | 0.00     |
| GT60       | 0.00     | 0.00     | 0.00     |
| GH41       | 0.00     | 0.00     | 0.00     |
| CE7        | 0.16     | 0.12     | 0.02     |
| GH39       | 0.08     | 0.02     | 0.02     |
| GT30       | 0.24     | 0.44     | 0.20     |
| PL15       | 0.03     | 0.22     | 0.06     |
| GH102      | 0.03     | 0.00     | 0.02     |
