# Supplementary material for: Global Profiling of Carbohydrate Active Enzymes in Human Gut Microbiome
Source: PubMed Central journal article supplement (PMC4636310; doi:10.1371/journal.pone.0142038), 2015-11-06
Supplement: pone.0142038.s012.pdf [file pone.0142038.s012.pdf]

## Supplementary Text S2

### Investigation of the CAZotype predictive ability of the CAZyme and taxonomic profiles using Partial Least Square (PLS) Regression

We performed two different PLS regression analyses for this purpose.

#### **Analysis 1**

In this analysis, we evaluated the ability of gut CAZyme abundance profiles (predictors) of the individuals for the prediction of the CAZotypes (response) obtained earlier (using the BCA approach) for the corresponding individuals.

**Objective:** The objective was to obtain a cross validation of how good the CAZyme profiles are for the prediction of CAZotypes, as well as to identify the key CAZymes that have the best predictive power for CAZotype classification.

**Methods:** The PLS regression analyses were performed using plsdepot package of the R programming interface with the CAZyme abundance profiles as the predictor variables and the CAZotype as the response. The predictive ability of the predictor variables for the response was evaluated using two parameters, namely the correlation of the three PLS components with the response and the fraction variance of the response explained by each PLS component.

In order to identify CAZyme families with the most predictive power, the following approach was adopted. For each PLS component, the coefficient weights for the various CAZyme families were first obtained. CAZymes with the most positive weights (top 15) and the most negative weights (top 15 with the most negative weight) were then selected as the ones with the highest predictive power. This was done for all the PLS components. Subsequently, a unique set of CAZyme was prepared containing CAZymes with the most predictive ability in either of the three PLS Components.

**Results:** The PLS regression indicated that the two PLS components t1 and t2, obtained were observed to have good correlation values (0.845 and 0.792, respectively) with the response (i.e. CAZotypes). The percentage of variance of response explained by the three PLS components was also observed to be high, ranging from 0.707 (for component t1) to 0.758 (for component t3).

Table 1 provides the list of predictive CAZymes obtained in the PLS regression analysis.

Table 1: PLS component weights for the list of predictive CAZymes

| CAZyme | Weight (t1) | Weight (t2) | Weight (t3) | CAZotype Specificity |
|--------|-------------|-------------|-------------|----------------------|
| GH115  | 0.1073      | 0.0179      | -0.0294     | CT1-Specific         |
| GH2    | 0.1574      | 0.0257      | -0.0550     | CT1-Specific         |
| GH28   | 0.1291      | 0.0778      | 0.0829      | CT1-Specific         |
| GH43   | 0.1344      | -0.0046     | 0.0029      | CT1-Specific         |
| GH76   | 0.0486      | 0.0789      | -0.1889     | CT1-Specific         |
| GH78   | 0.0793      | 0.1517      | -0.0073     | CT1-Specific         |
| GH88   | 0.0624      | 0.2096      | 0.0806      | CT1-Specific         |
| GH92   | 0.0830      | 0.0934      | -0.1113     | CT1-Specific         |
| GH97   | 0.1044      | -0.0167     | -0.0986     | CT1-Specific         |
| PL1    | 0.0780      | 0.1114      | 0.0147      | CT1-Specific         |
| PL8    | 0.0480      | 0.1750      | 0.0036      | CT1-Specific         |
| GH23   | 0.1363      | 0.0135      | 0.0662      | CT2-Specific         |
| GH24   | 0.0135      | -0.1991     | -0.2249     | CT2-Specific         |
| GH31   | 0.1411      | -0.0308     | -0.0212     | CT2-Specific         |
| GH4    | 0.0598      | 0.0157      | 0.1527      | CT2-Specific         |
| GH73   | 0.1159      | -0.0481     | 0.0223      | CT2-Specific         |
| GH101  | 0.0664      | -0.0932     | -0.1305     | CT3-Specific         |
| GH129  | 0.0977      | 0.0785      | 0.1421      | CT3-Specific         |
| GH29   | 0.1411      | 0.1094      | 0.1190      | CT3-Specific         |
| GH32   | 0.1304      | -0.0162     | 0.0769      | CT3-Specific         |
| GH33   | 0.1076      | 0.0563      | 0.0553      | CT3-Specific         |
| GH36   | 0.1421      | -0.0164     | 0.0481      | CT3-Specific         |
| GH38   | 0.1038      | 0.1534      | 0.2593      | CT3-Specific         |
| GH42   | 0.1114      | 0.0962      | 0.2061      | CT3-Specific         |
| GH5    | 0.1268      | 0.0598      | 0.1911      | CT3-Specific         |
| GH51   | 0.1464      | -0.0291     | 0.0058      | CT3-Specific         |
| GH77   | 0.1332      | 0.0487      | 0.1488      | CT3-Specific         |
| GH95   | 0.1549      | -0.0061     | -0.0251     | CT3-Specific         |
| GH20   | 0.1395      | 0.0618      | -0.0063     | CT3/CT1-Specific     |
| GH13   | 0.1331      | 0.0213      | 0.1339      | CT3/CT2-Specific     |
| GH25   | 0.1145      | -0.0277     | 0.1053      | CT3/CT2-Specific     |
| GH102  | 0.0191      | -0.1643     | -0.1333     |                      |
| GH105  | 0.0858      | 0.1412      | 0.0331      |                      |
| GH110  | 0.0874      | -0.0662     | -0.2562     |                      |
| GH112  | 0.1070      | 0.0920      | 0.1840      |                      |
| GH116  | 0.0074      | 0.1198      | -0.0127     |                      |
| GH117  | 0.0388      | 0.0851      | -0.1466     |                      |
| GH125  | 0.1369      | 0.1608      | 0.1942      |                      |
| GH127  | 0.1050      | -0.1180     | -0.1762     |                      |
| GH16   | 0.0877      | -0.0119     | -0.1583     |                      |
| GH18   | 0.1236      | 0.2287      | 0.2397      |                      |
| GH27   | 0.0804      | -0.0312     | -0.1653     |                      |
| GH3    | 0.1517      | 0.0066      | 0.0003      |                      |
| GH30   | 0.1220      | 0.1005      | 0.0812      |                      |
| GH35   | 0.1225      | -0.0108     | -0.1303     |                      |
| GH37   | 0.0192      | -0.1234     | -0.0704     |                      |
| GH50   | 0.0435      | 0.0359      | -0.1780     |                      |
| GH55   | 0.0188      | 0.1327      | 0.1090      |                      |
| GH63   | 0.0693      | -0.0560     | -0.1310     |                      |
| GH72   | 0.1329      | -0.0301     | 0.0527      |                      |
| GH84   | 0.0864      | -0.1056     | -0.1772     |                      |
| GH89   | 0.1058      | -0.0505     | -0.2213     |                      |
| GH91   | 0.0133      | 0.0398      | -0.1177     |                      |
| GH99   | 0.0230      | 0.0178      | -0.1060     |                      |
| PL12   | 0.0466      | 0.2231      | 0.0886      |                      |
| PL13   | 0.0430      | 0.2061      | 0.0521      |                      |
| PL15   | 0.0469      | 0.1921      | 0.0464      |                      |
| PL21   | 0.0110      | 0.1431      | 0.0804      |                      |
| PL9    | 0.0438      | -0.1150     | -0.2035     |                      |

A total of 59 CAZyme families were identified to have good predictive abilities for the CAZotypes. Interestingly, this list of CAZyme families was also observed to contain 12 (out of the 14), seven (out of the nine) and 15 (out of the 17) CAZyme families identified earlier (using Welch's t-test) to be significantly over-abundant in CAZotypes 1, 2 and 3 respectively (S5 Fig). This result further validates that these sets of over-abundant CAZymes act as drivers for the different CAZotypes.

## Analysis 2

**Objective:** The objective was to investigate whether the taxonomic composition of the gut microbiomes can have enough predictive ability for the CAZotype of an individual.

**Methods:** Three different gut taxonomic profiles of the individuals were obtained at the levels of phylum, order and genus, respectively. The three profiles were then individually used as predictors for the CAZotypes of the corresponding individuals. The PLS regression analyses were performed using plsdepot package of the R programming interface. The predictive ability of the predictor variables for the response was evaluated using two parameters, namely the correlation of the three PLS components with the response and the fraction variance of the response explained by each PLS component.

**Results:** Table 2 shows the CAZotype predictive ability of the taxonomic profiles at the taxonomic levels of phylum, order, and genus.

Table 2 (a) Correlation of the PLS components with the response variables for the three different scenarios (b) Fraction of variance explained by each PLS component for the response variables for the different scenarios.

(A)

| Predictors                        | Correlation of the PLS Components |       |       |
|-----------------------------------|-----------------------------------|-------|-------|
|                                   | t1                                | t2    | t3    |
| Taxonomic Profile at Phylum Level | 0.257                             | 0.038 | 0.025 |
| Taxonomic Profile at Order Level  | 0.284                             | 0.077 | 0.031 |
| Taxonomic Profile at Genus Level  | 0.684                             | 0.41  | 0.31  |

(B)

| Predictors                        | Variance within Response explained |       |       |
|-----------------------------------|------------------------------------|-------|-------|
|                                   | t1                                 | t2    | t3    |
| Taxonomic Profile at Phylum Level | 0.067                              | 0.07  | 0.064 |
| Taxonomic Profile at Order Level  | 0.115                              | 0.113 | 0.112 |
| Taxonomic Profile at Genus Level  | 0.681                              | 0.51  | 0.36  |

As observed in Table 2, although the predictive power of the taxonomic profiles is low at the non-specific levels of phylum and order, it increases noticeably at the specific level of genus. The above results suggest that specific microbial groups tend to harbor specific groups of CAZymes, which in turn influence the CAZotype of an individual. The lower predictive ability at non-specific levels may indicate a high degree of functional heterogeneity within microbial genera/species within a specific broader group of phylum or order, leading to lower predictive power of profiles at these taxonomic levels.
